# Supplementary material for: Gene expression evolution in pattern-triggered immunity within Arabidopsis thaliana and across Brassicaceae species
Source: Plant Cell. 2021 Mar 5;33(6):1863–87. doi: 10.1093/plcell/koab073 (PMC8290292; doi:10.1093/plcell/koab073)
Supplement: koab073_Supplementary_Data [file koab073_supplementary_data.zip]

Archive with 12 entries (12 files):
- tpc.00600.2020-s01.pdf
- tpc.00600.2020-s02.xlsx
- tpc.00600.2020-s03.xlsx
- tpc.00600.2020-s04.xlsx
- tpc.00600.2020-s05.xlsx
- tpc.00600.2020-s06.xlsx
- tpc.00600.2020-s07.xlsx
- tpc.00600.2020-s08.xlsx
- tpc.00600.2020-s09.xlsx
- tpc.00600.2020-s10.xlsx
- tpc.00600.2020-s11.pdf
- tpc.00600.2020-s12.pdf
