# Supplementary material for: Gene expression evolution in pattern-triggered immunity within Arabidopsis thaliana and across Brassicaceae species
Source: Plant Cell. 2021 Mar 5;33(6):1863–87. doi: 10.1093/plcell/koab073 (PMC8290292; doi:10.1093/plcell/koab073)
Supplement: koab073_Supplementary_Data [file koab073_supplementary_data.zip › tpc.00600.2020-s05.xlsx]

## Sheet: Supplemental Data Set 4
Supplemental Data. Winkelmüller, Entila, Anver et al. (2021). Gene expression evolution in pattern-triggered immunity within Arabidopsis thaliana and across Brassicaceae species. Plant Cell.
Supplemental Data Set 5. Expression changes (log2) of DEGs in Figure 4G.
	UniqueID	Can0	GyO	Kn0	Kon	No0
cluster1	AT4G29120	-1.09465	-0.0711144	0.0985129	-0.347076	-0.161201
cluster1	AT3G17580	-1.07887	0.263596	0.117698	0.083045	-0.487119
cluster1	AT3G29030	-1.15203	0.223442	0.0247489	-0.534156	-0.161465
cluster1	AT3G50740	-1.29072	-0.463959	0.0438165	-0.328371	0.210094
cluster1	AT3G56290	-1.31176	-0.174168	-0.126014	-0.231895	0.0316845
cluster1	AT5G01200	-1.41139	0.147942	0.0822426	0.116433	-0.0376607
cluster1	AT5G27440	-1.07317	0.305975	0.025572	-0.162867	-0.125608
cluster1	AT5G39520	-1.84438	0.260378	0.161982	NaN	-0.334667
cluster1	AT5G47330	-1.05207	-0.42848	-0.268597	-0.0696486	-0.41466
cluster1	AT5G48500	-1.03228	-0.200397	-0.486295	-0.537217	-0.278234
cluster1	AT5G50240	-1.01507	-0.350964	-0.287218	-0.90948	-0.0564178
cluster1	AT5G67390	-1.23798	-0.00466469	0.128789	-0.820994	-0.335638
cluster1	AT1G01250	-1.59206	0.0107007	-0.479267	-0.385174	-0.0109311
cluster1	AT1G02470	-0.899283	-1.21143	-0.273805	-0.219102	0.105018
cluster1	AT1G16730	-1.10155	-0.254743	-0.0248875	-0.183215	-0.130139
cluster1	AT1G24530	-1.11788	-0.0635868	0.499073	-1.03463	-0.258914
cluster1	AT1G26945	-1.3692	-0.613238	0.408773	-0.355067	-0.744888
cluster1	AT1G34640	-1.14666	-0.328968	-0.361103	-0.37501	-0.255599
cluster1	AT1G45010	-1.00894	-0.74888	0.228722	-0.465066	-0.0280565
cluster1	AT1G47655	-1.05589	-0.594962	0.207721	-0.540621	-0.468102
cluster1	AT1G48260	-1.40448	-0.414768	-0.369765	0.343149	-0.432166
cluster1	AT1G53130	-1.49875	0.641918	-0.0448652	-1.24362	-0.144528
cluster1	AT1G53830	-1.12479	-0.54609	0.00253587	-0.184068	-0.404503
cluster1	AT1G60870	-1.15962	-0.338029	-0.230369	-0.788595	-0.234786
cluster1	AT1G71866	-2.46212	-0.257973	-0.0657874	NaN	NaN
cluster1	AT1G73120	-1.08271	-0.0667716	-0.00404146	-0.0780242	0.0686432
cluster1	AT1G74430	-1.6478	-0.486792	-0.694694	-0.567586	-0.250243
cluster1	AT1G78020	-1.59465	-0.433827	-0.481878	-0.521095	-0.0454823
cluster1	AT1G79580	-1.03236	0.056717	-0.0955489	-0.616774	-0.360695
cluster1	AT2G01290	-1.03093	-0.499046	-0.341012	-0.568304	-0.0612559
cluster1	AT2G02590	-1.08467	-0.0761604	-0.0513209	-0.354323	-0.592719
cluster1	AT2G19310	-1.61251	-0.127832	-0.584027	-0.323021	-0.795867
cluster1	AT2G25720	-1.07843	-0.326554	-0.107472	-0.63133	-0.325907
cluster1	AT2G27130	-1.15225	-0.137489	0.0383787	-0.679448	-0.0668664
cluster1	AT2G27770	-1.21407	-0.0536131	-0.334378	-1.01966	-0.543304
cluster1	AT2G28630	-1.0649	-0.48807	0.573044	-0.0801758	-0.4379
cluster1	AT2G37530	-1.54539	-0.0592322	-0.453908	-1.45428	-0.332723
cluster1	AT2G41290	-1.17891	-0.48444	-0.126584	-0.475253	-0.547542
cluster1	AT2G43060	-1.19941	-0.0805063	-0.18259	-0.366282	-0.487512
cluster1	AT2G43550	-1.06233	-0.339874	-0.361109	-0.388372	-0.347431
cluster1	AT2G43880	-1.16964	-0.375472	0.00562511	-0.692381	-0.109262
cluster1	AT3G03690	-1.04913	-0.482951	-0.115652	-0.230179	-0.77058
cluster1	AT3G04310	-1.31182	-0.34982	-0.474171	-0.569392	-0.662845
cluster1	AT3G05800	-1.18319	-0.255603	0.116517	0.0837754	-0.478096
cluster1	AT3G12870	-1.10384	-0.505975	0.0411003	-0.727664	-0.763472
cluster1	AT3G14060	-2.04749	-0.452252	0.486586	-0.558569	-0.0742256
cluster1	AT3G21270	-1.05482	-0.443014	0.122322	-0.605992	-0.0982722
cluster1	AT3G21460	-1.2991	-0.1807	-0.0344916	-1.068	-0.0417666
cluster1	AT3G21560	-1.36254	-0.686957	-0.291648	-0.214926	-0.0256245
cluster1	AT3G21670	-1.19644	-0.32999	-0.649454	-0.140886	-0.464732
cluster1	AT3G21890	-2.11731	-0.449398	-0.653904	NaN	0.0590584
cluster1	AT3G22410	-0.976344	-0.696235	-0.173031	-1.0867	-0.0237055
cluster1	AT3G22540	-1.43117	-0.299281	-0.123328	-0.616657	0.406409
cluster1	AT3G23805	-1.19354	-0.68907	-0.105465	-0.660767	-0.549654
cluster1	AT3G24450	-1.20928	-0.591405	-0.226114	-0.603728	0.116813
cluster1	AT3G25905	-1.03618	-0.505349	0.142414	-0.880026	-0.52467
cluster1	AT3G27270	-1.06715	-0.120796	-0.146421	-0.455579	0.00762274
cluster1	AT3G44020	-1.08501	-0.302592	-0.342186	-0.621846	0.140529
cluster1	AT3G48970	-1.09603	-0.584442	0.16062	-0.79038	-0.679164
cluster1	AT3G50640	-1.35366	-0.374242	0.461571	-0.52493	-0.194577
cluster1	AT3G50685	-1.09385	-0.549899	-0.325346	-0.534674	-0.39139
cluster1	AT3G51600	-1.08957	-0.55417	-0.0403254	-0.732403	-0.477409
cluster1	AT3G53210	-1.22395	-0.625609	-0.22879	-0.565462	-0.752216
cluster1	AT3G56220	-1.045	-0.55859	-0.373371	-0.574539	-0.523419
cluster1	AT3G57062	-1.11261	-0.219074	-0.186644	-0.498481	-0.466638
cluster1	AT3G61550	-1.13705	-0.780276	0.174248	-1.17922	-0.525572
cluster1	AT3G62000	-1.05929	-0.329491	-0.376256	-0.32581	-0.653964
cluster1	AT3G62650	-1.10169	-0.213345	-0.139744	-0.5328	-0.390966
cluster1	AT4G00895	-1.03843	-0.460007	-0.330701	-0.742572	-0.513582
cluster1	AT4G03965	-1.49765	-0.864629	-0.261789	NaN	NaN
cluster1	AT4G09620	-1.03494	-0.449364	-0.573788	-0.769643	-0.417509
cluster1	AT4G09650	-1.04317	-0.130612	-0.141618	-0.25098	-0.289254
cluster1	AT4G09890	-1.06494	-0.619483	-0.178178	-1.01629	-0.433215
cluster1	AT4G15440	-1.16919	-0.281176	-0.398638	-0.561869	-0.486961
cluster1	AT4G16447	-1.15935	0.0497809	-0.214224	-0.618166	-0.673474
cluster1	AT4G16515	-1.21513	-0.624584	0.534253	-1.68535	-0.717101
cluster1	AT4G16610	-1.68928	-0.0652966	-0.247443	-0.714393	-0.526355
cluster1	AT4G17245	-1.06304	-0.301781	0.0118947	-1.3177	-0.287868
cluster1	AT4G17870	-1.03158	-0.302052	-0.178142	-0.558155	-0.329741
cluster1	AT4G19100	-1.7002	-0.328543	-0.306384	-0.74494	-0.872242
cluster1	AT4G19645	-1.12454	-0.0674395	-0.564856	-0.230352	-0.118402
cluster1	AT4G22666	-1.33274	-0.98886	0.4264	-1.39675	-0.774846
cluster1	AT4G22790	-1.15888	-0.430107	-0.460301	-0.709952	-0.458468
cluster1	AT4G23070	-1.3932	-1.40686	0.423353	-0.287351	-0.837881
cluster1	AT4G24660	-1.25622	-0.533956	-0.670812	-1.14388	-0.11847
cluster1	AT4G27030	-1.20568	-0.40899	-0.666056	-0.839317	-0.457844
cluster1	AT4G31600	-1.31391	-0.398331	-0.46584	-0.908373	-0.635605
cluster1	AT4G32290	-1.15242	-0.755801	-0.516571	-0.936082	-0.447363
cluster1	AT4G32340	-1.01004	-0.789506	-0.399261	-0.228954	-0.702689
cluster1	AT4G34740	-1.06774	-0.581683	-0.30807	-1.03519	-0.551188
cluster1	AT4G37150	-1.37668	-0.365514	0.175762	-1.62661	-0.0651718
cluster1	AT4G37540	-1.07853	-0.67193	-0.00318801	-1.41538	-0.682631
cluster1	AT4G37800	-1.04255	-0.581684	-0.148986	-0.565141	-0.436415
cluster1	AT4G38020	-1.24531	-0.356981	-0.305772	-0.3486	-0.66087
cluster1	AT4G38100	-1.22515	-0.494974	-0.35025	-1.16295	-0.618629
cluster1	AT5G03050	-1.2899	-0.483881	-0.450833	-0.445728	-0.353916
cluster1	AT5G05990	-1.2047	-0.587224	-0.538061	-0.953784	-0.636586
cluster1	AT5G06270	-1.18938	-0.747277	-0.466793	-0.715006	-0.710839
cluster1	AT5G06470	-1.19534	-0.488023	-0.133013	-1.41149	-0.404136
cluster1	AT5G07580	-1.23201	-0.258726	-0.631579	-0.878005	-0.508752
cluster1	AT5G07670	-1.061	-0.497281	-0.505719	-0.755557	-0.504923
cluster1	AT5G09440	-1.2414	-0.353194	-0.218849	-0.631726	-0.203402
cluster1	AT5G12050	-1.15869	-0.426411	0.367554	-1.3017	-1.28174
cluster1	AT5G13170	-1.36317	-0.611856	-0.0378446	-0.539326	-0.261221
cluster1	AT5G14410	-1.22291	-0.406176	-0.261142	-0.79849	-0.550214
cluster1	AT5G15180	-1.44149	-0.813234	0.268091	-0.771942	-1.08875
cluster1	AT5G17220	-1.075	-0.302571	-0.377454	-0.457151	-0.56015
cluster1	AT5G19970	-1.00702	-0.467043	-0.0193601	-0.995301	-0.684376
cluster1	AT5G20700	-1.19195	-0.420632	-0.292518	-0.683223	-0.180123
cluster1	AT5G22460	-1.21353	-0.0730519	-0.537904	-0.238716	-0.846774
cluster1	AT5G24570	-1.63682	-0.841203	-0.420421	-1.02203	-0.433877
cluster1	AT5G25480	-1.04509	-0.403979	-0.438743	-1.0084	-0.634292
cluster1	AT5G25840	-1.07095	-0.351036	-0.362217	-1.1008	-0.445312
cluster1	AT5G26960	-1.19082	-0.504359	-0.00505723	-0.904443	-0.37372
cluster1	AT5G37670	-1.20284	-0.302214	0.118642	-0.672822	-0.610611
cluster1	AT5G37680	-1.26694	-0.659323	-0.607229	-0.67367	-0.557275
cluster1	AT5G38980	-1.37812	-0.472287	-0.281053	-0.407456	-0.432958
cluster1	AT5G42780	-1.04492	-0.634947	-0.556442	-0.820881	-0.657446
cluster1	AT5G43250	-0.967006	-0.218299	-0.549609	-1.1748	-0.647428
cluster1	AT5G44005	-1.27485	0.419992	-0.813126	-1.31692	-0.00583622
cluster1	AT5G44600	-1.1026	-0.728962	-0.61409	-0.779778	-0.63146
cluster1	AT5G45960	-1.60781	-0.699345	-0.383601	0.138771	-1.00761
cluster1	AT5G47550	-1.76316	-0.480922	-0.0658421	-1.02448	-0.754744
cluster1	AT5G48545	-1.34902	-0.195679	-0.318922	-0.826548	-0.740896
cluster1	AT5G49015	-1.05668	-0.619236	0.404899	-0.939763	-0.770013
cluster1	AT5G49100	-1.22678	-0.746602	-0.438101	-1.11523	-0.585167
cluster1	AT5G52180	-1.09525	-0.776898	-0.33185	-1.05764	-0.794622
cluster1	AT5G52190	-1.57241	-0.458226	-0.35331	-0.89251	-0.529922
cluster1	AT5G52900	-1.0128	-0.53861	1.02151	-1.48632	-1.03253
cluster1	AT5G53486	-1.44694	-0.887131	-0.501541	-1.20141	-0.46205
cluster1	AT5G53980	-1.16541	-1.03497	-0.685005	-0.420667	-0.532757
cluster1	AT5G54530	-1.41723	-1.36796	0.0169244	-1.36272	-0.576173
cluster1	AT5G54980	-1.01451	-0.646518	-0.217209	-0.791686	-0.612412
cluster1	AT5G59470	-1.03943	-0.252334	-0.460917	-0.923863	-0.611897
cluster1	AT5G59990	-1.25696	-1.49149	-0.0855979	-0.832057	0.468077
cluster1	AT5G60660	-1.05517	-0.786508	0.220401	-0.780351	-0.463002
cluster1	AT5G61290	-1.30391	-0.393619	0.214426	-0.794986	-1.19776
cluster1	AT5G61570	-0.924073	0.158505	-0.319471	-0.566717	-1.11845
cluster1	AT5G63450	-1.27757	0.439114	0.424056	0.158412	-1.09832
cluster1	AT5G65410	-1.27903	-0.753554	-0.650998	-0.9999	-0.341071
cluster1	AT5G65860	-1.11426	-0.512255	-0.518468	-1.28885	-0.575149
cluster1	AT5G66270	-1.00383	-0.288972	-0.271782	-0.886587	-0.783617
cluster1	AT1G04550	-1.05886	-0.742765	-0.326721	-0.693581	-0.441428
cluster1	AT1G04635	-1.05852	-0.254467	-0.19842	-1.15101	-0.86181
cluster1	AT1G05385	-1.18947	-0.436168	-0.486338	-0.714011	-1.12016
cluster1	AT1G06475	-1.41538	-0.272446	-0.76958	-0.970031	-0.311204
cluster1	AT1G11112	-1.17786	-0.780695	-0.462843	-0.860138	-0.553054
cluster1	AT1G11655	-1.92223	-1.25255	0.11543	-0.644483	-0.724758
cluster1	AT1G12090	-1.27532	-0.900308	-0.233193	-0.863484	-0.661713
cluster1	AT1G12500	-1.0162	-0.459554	0.0908267	-0.828547	-0.519032
cluster1	AT1G14340	-1.24121	-0.856715	-0.303031	-0.875114	-0.603434
cluster1	AT1G16850	-1.12844	-0.37265	-0.259979	-1.1807	-0.744364
cluster1	AT1G17100	-1.25777	-0.722658	-0.596331	-0.972862	-0.926351
cluster1	AT1G17200	-1.05386	-0.587112	-0.386191	-0.707547	-0.346863
cluster1	AT1G17430	-1.31566	-0.665116	-0.220997	-0.890047	-1.09376
cluster1	AT1G17700	-1.18486	-1.02705	-0.180775	-0.945904	-0.273641
cluster1	AT1G20470	-1.6326	-0.726156	-0.815665	-1.01563	-0.200228
cluster1	AT1G22500	-1.23282	-0.787696	-0.173002	-1.08207	-0.118613
cluster1	AT1G23050	-1.43157	-0.800791	0.0467878	-1.19937	-1.09964
cluster1	AT1G23980	-1.3306	-0.957953	-0.259985	-0.706804	-0.783865
cluster1	AT1G24020	-1.1983	-0.923162	-0.840965	-0.789698	-0.566833
cluster1	AT1G30500	-1.02843	-0.505435	-0.549659	-1.39039	-0.590244
cluster1	AT1G32583	-1.23981	-0.650392	-0.662791	-1.01212	-0.926232
cluster1	AT1G33780	-1.17447	-0.522762	-0.541041	-0.693953	-0.587331
cluster1	AT1G34010	-1.10864	-0.558773	-0.220501	-1.13397	-0.656357
cluster1	AT1G34580	-0.787688	-0.258418	0.0470118	-0.706003	-1.15597
cluster1	AT1G35420	-1.27612	-0.528707	-0.576017	-0.961926	-0.878367
cluster1	AT1G51400	-1.42878	-0.383227	-0.483593	-0.830376	-0.983771
cluster1	AT1G52880	-1.02086	-0.513011	-0.282377	-0.978052	-0.48845
cluster1	AT1G55260	-1.06733	-0.524387	-0.47559	-0.727746	-0.534889
cluster1	AT1G59700	-1.2717	-0.498839	-0.441335	-0.828561	-0.851675
cluster1	AT1G61740	-1.13195	-0.684884	-0.142984	-0.892956	-0.818595
cluster1	AT1G64450	-1.01295	-0.673646	-0.513428	-1.40415	-0.72133
cluster1	AT1G66350	-1.41403	-0.810233	-0.776073	-0.786193	-0.938461
cluster1	AT1G68540	-1.06458	-0.202613	-0.628913	-0.522332	-1.13403
cluster1	AT1G69310	-1.01324	-0.474457	-0.0654407	-0.330447	-0.61007
cluster1	AT1G70985	-1.79841	-1.40195	-0.956234	-1.02215	-0.0488043
cluster1	AT1G72310	-0.941453	-0.496054	-0.353064	-1.21655	-0.340428
cluster1	AT1G72430	-1.05725	-0.411239	-0.306011	-1.41324	-0.715594
cluster1	AT1G74940	-1.09335	-0.773672	-0.327945	-1.13789	-0.70908
cluster1	AT1G75240	-1.24266	-0.887213	-0.330346	-1.30426	-0.461213
cluster1	AT1G75580	-1.66033	-0.442162	-0.615582	-0.73978	-0.416849
cluster1	AT1G75590	-0.971077	-0.833933	-0.368961	-1.1175	-0.79851
cluster1	AT1G76110	-1.23228	-0.430051	-1.05518	-0.520222	-0.596635
cluster1	AT1G76240	-1.30996	-0.58634	-0.234182	-1.37998	-0.572784
cluster1	AT1G78170	-1.24342	-0.306194	-0.507854	-0.659039	-0.66644
cluster1	AT1G79060	-1.03829	-0.618104	-0.766327	-0.980605	-0.479919
cluster1	AT1G80760	-1.1227	-0.87515	-0.527354	-1.11446	-0.554734
cluster1	AT2G02990	-0.837968	-1.00808	0.0416823	-0.754481	-0.554227
cluster1	AT2G03350	-1.03032	-0.566228	-0.431888	-0.877752	-0.705444
cluster1	AT2G03420	-1.2766	-0.466764	-0.633989	-0.74379	-0.962259
cluster1	AT2G17695	-1.08455	-0.376626	-0.398776	-0.480766	-0.796006
cluster1	AT2G17972	-1.4782	-0.621325	-0.667751	-1.18256	-0.908102
cluster1	AT2G18550	NaN	-1.25674	0.382112	0.322032	-1.20391
cluster1	AT2G21220	-1.46705	-0.540885	-0.55408	-0.623715	-0.81541
cluster1	AT2G21320	-1.44962	-0.619141	-0.587985	-0.850911	-1.01625
cluster1	AT2G21970	-1.37184	-0.543835	-0.258491	-0.877506	-0.532205
cluster1	AT2G22200	-2.10268	-0.946051	-1.17984	-1.18757	-0.18688
cluster1	AT2G22540	-1.02774	-0.588329	-0.408638	-0.557796	-0.459921
cluster1	AT2G24150	-0.963187	-0.630147	-0.405536	-1.09435	-0.869715
cluster1	AT2G25000	-1.53655	-0.808289	-0.469801	-1.20439	-0.535731
cluster1	AT2G26680	-0.736034	-0.61736	-0.264777	-1.02714	-0.715408
cluster1	AT2G28310	-1.17253	-0.761018	-0.518005	-0.643354	-0.671822
cluster1	AT2G28605	-1.4798	-0.680277	-0.445668	-0.691071	-0.806506
cluster1	AT2G30230	-1.46244	-0.468683	-0.499913	-1.14158	-1.25405
cluster1	AT2G33855	-1.52981	-0.670134	-0.407817	-1.00482	-0.458473
cluster1	AT2G34340	-1.51	-0.699994	-0.164484	-1.16401	-0.718554
cluster1	AT2G37300	-1.12254	-0.516386	-0.765338	-1.55101	-0.565273
cluster1	AT2G37330	-0.812704	-0.646994	0.0488315	-1.03428	-0.703845
cluster1	AT2G37390	-1.16763	-0.46636	-0.250538	-0.965699	-0.546908
cluster1	AT2G37640	-1.24983	-0.923269	-0.678841	-1.2163	-0.626909
cluster1	AT2G39010	-1.20062	-0.642432	-0.30896	-0.75817	-0.545594
cluster1	AT2G42975	-1.23742	-0.53582	-0.439152	-0.888945	-0.464856
cluster1	AT2G43100	-1.08163	-0.780402	-0.433885	-1.31488	-0.659973
cluster1	AT2G43340	-1.3237	-0.197943	-0.573946	-0.991907	-0.657881
cluster1	AT2G44745	-1.81106	-1.06549	-0.651935	-1.25219	-0.481106
cluster1	AT2G44940	-1.36555	-0.48102	-0.815303	-0.967561	-0.48925
cluster1	AT2G45180	-1.44768	-0.617083	-0.309311	-0.604665	-0.756272
cluster1	AT2G46570	-1.53371	-1.19007	-0.516511	-0.999371	-0.618348
cluster1	AT2G46640	-1.21607	-0.54193	-0.844866	-0.669891	-0.966286
cluster1	AT2G47910	-1.08904	-0.726511	-0.282048	-0.777414	-0.812455
cluster1	AT2G48080	-0.839744	-1.26969	-0.149815	-0.832949	-0.116553
cluster1	AT3G03850	-1.30836	-1.45039	1.03711	-1.11127	-0.906245
cluster1	AT3G04860	-1.13664	-0.790431	-0.552516	-0.803184	-0.659194
cluster1	AT3G05410	-1.1016	-0.615998	-0.513194	-1.07198	-0.385327
cluster1	AT3G07150	-2.20686	-0.175239	-1.0303	-2.09613	-0.207818
cluster1	AT3G07340	-1.06086	-0.720567	-0.624204	-0.837411	-0.430654
cluster1	AT3G08940	-1.39233	-0.612686	-0.458905	-1.12455	-0.993469
cluster1	AT3G09310	-1.37081	-0.138427	-0.930474	-1.04796	-0.730042
cluster1	AT3G12610	-1.14398	-0.692742	-0.168368	-1.40195	-0.832206
cluster1	AT3G12685	-1.03698	-0.549886	-0.375682	-0.450627	-0.729543
cluster1	AT3G13674	-1.63774	-0.709243	-0.398117	-1.00272	-0.607887
cluster1	AT3G14310	-0.961889	-0.735985	-0.59173	-1.27014	-0.659756
cluster1	AT3G14770	-1.18254	-0.608279	-0.16482	-0.949767	-0.889738
cluster1	AT3G16175	-1.81654	-0.986926	-0.871011	-0.533191	-0.205431
cluster1	AT3G16370	-1.06569	-0.615695	-0.30097	-0.700752	-0.840159
cluster1	AT3G17100	-1.01067	-0.615433	-0.449803	-1.10152	-0.812718
cluster1	AT3G17130	-1.23842	-0.834202	-0.574122	-1.15104	-0.405401
cluster1	AT3G17611	-0.944684	-0.278659	-0.134675	-0.823048	-1.09724
cluster1	AT3G20270	-1.17574	-0.368747	-0.889363	-0.579014	-0.906765
cluster1	AT3G25030	-1.13698	-1.12614	-0.966303	-1.24503	-0.205721
cluster1	AT3G25700	-1.04194	-1.08589	-0.187502	-1.09879	-0.709517
cluster1	AT3G28050	-1.21177	-0.755123	-0.590294	-0.626391	-0.580975
cluster1	AT3G44150	-0.907968	-0.702024	-0.253978	-1.05271	-0.435207
cluster1	AT3G44450	-1.13203	-0.898603	-0.72597	-0.589855	-0.720275
cluster1	AT3G45210	-1.10583	-0.702944	-0.494374	-0.855787	-0.580036
cluster1	AT3G48550	-1.3918	-0.926689	-0.497299	-1.16533	-0.299536
cluster1	AT3G53850	-1.20947	-0.801426	-0.640557	-1.15846	-0.915299
cluster1	AT3G54430	-1.20343	-0.573816	-0.661522	-0.963157	-1.04575
cluster1	AT3G56010	-1.21874	-0.479384	-0.481863	-0.781716	-0.787991
cluster1	AT3G57400	-1.23662	-0.691108	-0.402777	-1.26581	-0.933646
cluster1	AT3G58850	-1.47493	-1.15538	-0.409388	-1.04314	-0.764309
cluster1	AT3G61590	-1.04292	-0.692616	-0.593838	-1.58989	-0.794401
cluster1	AT3G62660	-0.757441	-0.530086	0.115116	-1.11763	-0.806906
cluster1	AT4G01130	-1.12725	-0.937333	-0.630511	-0.792915	-0.986044
cluster1	AT4G01410	-1.49612	-0.465108	-0.484915	-1.35309	-0.784275
cluster1	AT4G02715	-1.02507	-0.752558	-0.443484	-1.17572	-0.857367
cluster1	AT4G03150	-1.22416	-0.671873	-0.68474	-1.07253	-0.815435
cluster1	AT4G04880	-1.0711	-0.335741	-0.621186	-0.698745	-0.590186
cluster1	AT4G08700	-0.99641	-0.467917	-0.543746	-0.701194	-1.00354
cluster1	AT4G10400	-1.00658	-0.941568	-0.466572	-1.10202	-0.456954
cluster1	AT4G10600	-1.45825	-0.928255	-0.755841	-0.239299	-1.05155
cluster1	AT4G10800	-1.22642	-0.552045	-0.637921	-0.968715	-0.897359
cluster1	AT4G12320	-1.34002	-1.30327	-0.972481	-0.58875	-0.692004
cluster1	AT4G12520	-1.65613	-0.972312	0.275195	-1.57135	-0.813102
cluster1	AT4G12730	-0.959656	-0.905004	-0.3445	-1.00155	-0.822939
cluster1	AT4G13620	-1.56896	-0.925123	-0.360863	-1.40141	-1.04196
cluster1	AT4G14040	-1.04103	-0.66274	-0.481423	-0.5834	-0.811791
cluster1	AT4G18390	-1.11588	-0.864329	-0.484369	-1.1551	-0.853161
cluster1	AT4G18700	-0.919383	-0.484609	-0.602279	-1.09904	-0.821956
cluster1	AT4G18740	-1.01019	-0.518107	-0.626891	-0.68347	-0.975357
cluster1	AT4G19430	-1.56465	-0.695922	-0.520425	-0.330074	-1.06639
cluster1	AT4G20820	-0.438558	-1.00874	-0.138342	-0.0630121	-0.540186
cluster1	AT4G20840	-1.17566	-0.553442	-0.516213	-0.173202	-1.38194
cluster1	AT4G21445	-1.46788	-0.761999	-0.685513	-0.876304	-1.1403
cluster1	AT4G22560	-1.46588	-0.773402	-0.196884	-1.10467	-1.26894
cluster1	AT4G24120	-1.073	-0.795348	-0.727628	-1.12448	-0.736787
cluster1	AT4G25910	-1.2926	-0.56525	-0.844438	-0.89909	-0.586916
cluster1	AT4G28310	-1.17291	-0.911632	-0.576926	-1.25924	-0.783442
cluster1	AT4G28640	-1.12333	-0.370275	-0.584978	-0.69359	-1.0116
cluster1	AT4G30400	-1.22809	-0.857939	-0.401014	-1.12816	-0.800807
cluster1	AT4G30410	-0.885603	-0.437677	-0.415463	-1.02533	-0.619312
cluster1	AT4G30845	-1.08089	-0.583761	-0.576331	-1.18903	-0.925087
cluster1	AT4G34750	-1.26379	-0.649048	-0.502314	-1.50144	-0.575737
cluster1	AT4G36380	-1.13371	-0.977998	-0.4805	-0.87961	-0.748333
cluster1	AT4G37300	-1.18473	-0.809222	-0.684312	-0.945661	-0.961288
cluster1	AT4G37470	-1.18187	-0.958295	-0.563487	-1.04594	-0.721466
cluster1	AT4G38670	-1.21147	-0.842751	-0.554914	-1.16959	-0.618286
cluster1	AT4G38960	-1.08069	-0.868974	-0.776447	-0.692562	-0.798385
cluster1	AT4G40060	-1.05059	-0.778307	-0.0852382	-1.50509	-0.768961
cluster1	AT5G04490	-1.23359	-0.66016	-0.723135	-1.1162	-0.887639
cluster1	AT5G04950	-1.11254	-0.755429	-0.484673	-1.30024	-0.662184
cluster1	AT5G05630	-1.20922	-0.892081	-0.599578	-1.06141	-0.739602
cluster1	AT5G06980	-1.32945	-0.741588	-0.732295	-0.955681	-0.917801
cluster1	AT5G09450	-0.941857	-0.566816	-0.406868	-1.07968	-1.07371
cluster1	AT5G09990	-1.28787	-1.5267	-0.43226	-0.863926	-0.934317
cluster1	AT5G11890	-0.844263	-0.564205	-0.205212	-1.24973	-0.679649
cluster1	AT5G13610	-1.07616	-0.554725	-0.7136	-1.06468	-0.985077
cluster1	AT5G14110	-1.81537	-0.0570729	-1.69167	-0.506799	-0.929709
cluster1	AT5G15050	-1.00459	-0.799461	-0.471956	-1.16456	-0.998588
cluster1	AT5G15210	-0.806916	-0.843935	0.0682647	-1.25615	-0.782024
cluster1	AT5G15290	-1.88297	-1.32142	0.320634	-1.11433	-1.1728
cluster1	AT5G15770	-0.906617	-0.633513	-0.109352	-0.702257	-1.21703
cluster1	AT5G17600	-1.52698	-0.97281	-0.364882	-1.29598	-1.04105
cluster1	AT5G18840	-2.00935	-0.825262	-0.773532	-0.900152	-1.03358
cluster1	AT5G21280	-0.900594	-1.01582	-0.491434	-1.01556	-0.524706
cluster1	AT5G22310	-1.31215	-0.889925	-0.839144	-0.933463	-0.92544
cluster1	AT5G23920	-1.05412	-0.945056	-0.592848	-0.840771	-1.02164
cluster1	AT5G23930	-1.59061	-0.35062	-0.711837	-1.37972	-1.00767
cluster1	AT5G25120	-1.50293	-1.06961	-0.442128	-1.28997	-0.733008
cluster1	AT5G25220	-1.11242	-0.714212	-0.589959	-1.32249	-0.911416
cluster1	AT5G38700	-0.771676	-2.40568	0.644172	NaN	-0.89601
cluster1	AT5G39610	-0.629258	-1.08868	0.109931	0.011027	-1.01322
cluster1	AT5G40140	-1.22891	-1.11427	-0.608572	-1.4226	-0.529753
cluster1	AT5G43140	-1.06179	-0.631856	-0.580103	-0.843969	-0.827966
cluster1	AT5G43860	-0.938943	-0.883876	-0.0981031	-1.75421	-0.781425
cluster1	AT5G43980	-1.7573	-1.30872	-0.379763	-1.65716	-0.630366
cluster1	AT5G44130	-1.09396	-0.74107	-0.479643	-0.740679	-1.01697
cluster1	AT5G44260	-0.873612	-0.753078	-0.227738	-1.5472	-0.882271
cluster1	AT5G45940	-1.11748	-0.74322	-0.391168	-0.978857	-0.989048
cluster1	AT5G47440	-1.31202	-0.236061	-0.803426	-1.57093	NaN
cluster1	AT5G47640	-1.6077	-0.792066	-0.698644	-1.07562	-1.01846
cluster1	AT5G47760	-0.751562	-0.349845	-0.157581	-0.30249	-1.16976
cluster1	AT5G49300	-1.27806	-0.376487	-0.79587	-1.43599	-0.715423
cluster1	AT5G49560	-1.31798	-0.773432	-0.715006	-0.919562	-0.849035
cluster1	AT5G52780	-1.48179	-0.591368	-0.559986	-1.03707	-1.08197
cluster1	AT5G53160	-1.36162	-0.642014	-0.504041	-1.10822	-0.950583
cluster1	AT5G53280	-0.821085	-0.539354	-0.498337	-1.05266	-0.689197
cluster1	AT5G54880	-1.28405	-0.580784	-0.488624	-1.14101	-1.06531
cluster1	AT5G55730	-0.980211	-0.813882	-0.4819	-1.22873	-0.830485
cluster1	AT5G57660	-0.811685	-0.40637	-0.0873351	-1.06992	-0.964212
cluster1	AT5G59360	-1.6084	-1.02109	-0.665838	-1.47367	-0.65486
cluster1	AT5G62280	-1.08725	-0.918245	0.400648	-1.58427	-1.40428
cluster1	AT5G65990	-0.822425	-0.932661	-0.375801	-1.23095	-0.650749
cluster1	AT5G66590	-1.4678	-1.05534	-0.252391	-1.44431	-1.07157
cluster1	AT1G06080	-1.22862	-1.04998	-0.192413	-0.44283	-1.52972
cluster1	AT1G07720	-1.76269	-0.865645	-0.587758	-0.982497	-1.16732
cluster1	AT1G10530	-0.821524	-0.539042	-0.182841	-1.38506	-0.920022
cluster1	AT1G11545	-0.844007	-0.788784	-0.346768	-1.15099	-0.83232
cluster1	AT1G12990	-0.897886	-0.558069	-0.297897	-1.09182	-0.930228
cluster1	AT1G14345	-1.56628	-0.726691	-0.76886	-1.07124	-0.920817
cluster1	AT1G18650	-1.10962	-0.646974	-0.72474	-0.777096	-0.97451
cluster1	AT1G24040	-0.979098	-0.628797	-0.553947	-0.878364	-1.06368
cluster1	AT1G24450	-1.46885	-0.779857	-0.438525	-1.1036	-1.05415
cluster1	AT1G26220	-1.48631	-0.48288	-0.570614	-1.18822	-1.36077
cluster1	AT1G27050	-1.52173	-0.736847	-0.548514	-1.59123	-0.782487
cluster1	AT1G27480	-1.08937	-0.599403	-0.75202	-1.04259	-0.933734
cluster1	AT1G29790	-0.894482	-0.902213	-0.304262	-1.28989	-0.905674
cluster1	AT1G32520	-1.28184	-0.372314	-0.821558	-0.890986	-1.04705
cluster1	AT1G49510	-1.02655	-0.782153	-0.558677	-1.13343	-1.05904
cluster1	AT1G49620	-1.38681	-1.07331	-0.987529	-0.613492	-0.830084
cluster1	AT1G49650	-1.22513	-1.10733	-0.281409	-1.46503	-0.878989
cluster1	AT1G51100	-1.30683	-0.740047	-0.711712	-1.03421	-0.942987
cluster1	AT1G56310	-0.943425	-0.0425875	-0.635664	-0.608594	-1.23189
cluster1	AT1G57790	-2.06956	-0.654186	-0.639143	-1.14399	-1.19393
cluster1	AT1G60000	-1.22922	-0.963773	-0.544967	-0.955564	-1.15725
cluster1	AT1G62520	-1.05465	-0.763011	-0.502168	-1.24566	-0.954244
cluster1	AT1G71850	-1.06477	-0.825499	-0.777442	-1.23913	-0.643077
cluster1	AT1G72790	-0.967172	-1.4025	-0.285612	-0.819504	-1.00365
cluster1	AT1G74370	-1.01256	-0.335553	-0.818433	-0.745664	-0.857572
cluster1	AT1G75360	-1.65496	-0.24628	-1.27822	-0.979171	-0.975764
cluster1	AT1G75640	-0.736362	-1.02768	-0.572494	-0.576301	-0.438587
cluster1	AT1G77020	-1.11619	-0.500919	-0.56625	-0.787228	-1.23076
cluster1	AT1G79720	-0.784623	-0.427322	-0.383916	-1.04949	-0.870583
cluster1	AT2G18260	-0.71805	-1.30855	0.373577	-0.816144	-1.26212
cluster1	AT2G20520	-0.638503	-2.19169	0.35784	NaN	-0.66791
cluster1	AT2G20650	-0.525491	-0.273777	-0.0922847	-0.409921	-1.04847
cluster1	AT2G23600	-1.10437	-0.708494	-0.651577	-0.6196	-1.21036
cluster1	AT2G24310	-1.41994	-0.713104	-0.615339	-1.47779	-0.779661
cluster1	AT2G26840	-1.38675	-0.740274	-0.648509	-1.40091	-0.887171
cluster1	AT2G38570	-0.78207	-0.25106	-0.559488	-0.652135	-1.04448
cluster1	AT2G40475	-1.47692	-0.603488	-0.89974	-1.51391	-0.672278
cluster1	AT2G41950	-1.48123	-0.861311	-0.656675	-1.00725	-1.02225
cluster1	AT2G43820	-1.0139	-0.719098	-0.549015	-0.979228	-1.1773
cluster1	AT2G45120	-1.26191	-1.20811	-0.564435	-1.41943	-0.569066
cluster1	AT3G05120	-0.764673	-0.940179	-0.487108	-1.07417	-0.73347
cluster1	AT3G05180	-1.26537	-0.888994	-0.532386	-1.08627	-1.0905
cluster1	AT3G06520	-0.902525	-2.03353	-0.655873	-0.597861	-0.277886
cluster1	AT3G09580	-0.860877	-0.524663	-0.437637	-0.855097	-1.08553
cluster1	AT3G09710	-1.16755	-0.74335	-0.76678	-0.715641	-1.05358
cluster1	AT3G10520	-1.54346	-0.947485	-0.620151	-1.11477	-1.04109
cluster1	AT3G12930	-0.939856	-0.587707	-0.479068	-0.766457	-1.00031
cluster1	AT3G14370	-1.2212	-1.09541	0.15796	-1.89492	-1.00585
cluster1	AT3G16520	-0.735603	-0.448565	-0.271343	-1.19713	-0.973277
cluster1	AT3G20160	-0.419221	-1.31408	0.38729	-0.614148	-1.19899
cluster1	AT3G20810	-0.66825	-0.553728	-0.172629	-0.78892	-1.0517
cluster1	AT3G21360	-1.25703	-0.595208	-0.674626	-1.28549	-1.06733
cluster1	AT3G48740	-0.739895	-1.14182	-0.368858	-0.736882	-0.735494
cluster1	AT3G58100	-0.796136	-0.783851	-0.527645	-1.25922	-0.77326
cluster1	AT4G01460	-0.777676	-0.636313	-0.317919	-0.552519	-1.06962
cluster1	AT4G01840	-1.2369	-0.674785	-0.5812	-0.939646	-1.34599
cluster1	AT4G15540	-1.08639	-0.612308	-0.823225	-0.979856	-0.937729
cluster1	AT5G01520	-0.73244	-1.27206	-0.207642	-0.645517	-0.828234
cluster1	AT5G18760	-1.04945	-0.558191	-0.612932	-0.939029	-1.20795
cluster1	AT5G22940	-0.791704	-0.915201	-0.257544	-1.16973	-0.979889
cluster1	AT5G24840	-0.795778	-0.650166	-0.607119	-1.08694	-0.712458
cluster1	AT5G40600	-0.878155	-0.435955	-0.538691	-0.822172	-1.04443
cluster1	AT1G26600	-0.689839	-1.29367	-0.562221	-0.869574	-0.520447
cluster1	AT1G49180	-0.94573	-0.453708	-0.64097	-0.7025	-1.19704
cluster1	AT1G70210	-0.977826	-0.749505	-0.496579	-0.747753	-1.27495
cluster1	AT1G78260	-0.898194	-0.816266	-0.509608	-0.968915	-1.08786
cluster1	AT3G01600	-0.718267	-1.69896	-0.508734	-0.784064	-0.515564
cluster1	AT3G62860	-1.08572	-0.61751	-0.77384	-0.803242	-1.19383
cluster1	AT4G15830	-0.592591	-0.769755	-0.189701	-0.946715	-1.07518
cluster1	AT5G19040	-1.081	-0.398895	0.401838	-1.23575	0.0100871
cluster1	AT5G45790	-0.878719	-0.415005	-0.729441	-0.82795	-1.08317
cluster1	AT1G50000	-0.697112	-0.290978	-0.525095	-0.934823	-1.10571
cluster1	AT2G32710	-0.670535	-0.591129	-0.441362	-0.990257	-1.11964
cluster1	AT2G38090	-0.923768	-0.380723	-0.218113	-1.32402	-0.472775
cluster1	AT3G48480	-0.866837	-0.503144	-0.37868	-0.877792	-1.5238
cluster1	AT3G58000	-1.23324	0.460384	1.63178	-1.51034	-0.0944223
cluster1	AT3G58270	-0.910487	0.167183	0.178446	-1.69361	-0.981319
cluster1	AT4G09040	-0.841835	-0.62672	-0.60412	-0.896517	-1.13459
cluster1	AT5G58784	NaN	-0.812124	0.34202	-1.40918	-0.707778
cluster1	AT1G19690	-0.725725	-0.753495	-0.471325	-0.91829	-1.06968
cluster1	AT1G21410	-1.05368	-0.772523	-0.904658	-0.771324	-0.935682
cluster1	AT1G72600	-0.975758	-0.266864	-0.172279	-1.58762	-0.50487
cluster1	AT2G31085	-1.16069	-0.567121	0.289415	-1.93237	0.192858
cluster1	AT2G35860	-0.752157	-0.731392	-0.0402805	-1.29199	-0.652185
cluster1	AT2G36340	-0.723773	-0.587766	-0.711149	-1.08207	-0.864429
cluster1	AT3G06200	-0.660221	-0.373431	-0.393227	-1.04588	-0.958033
cluster1	AT3G06590	-0.730815	-0.804495	-0.357536	-1.08705	-0.567423
cluster1	AT3G51400	-0.89054	-0.552039	-0.491006	-1.21028	-0.194227
cluster1	AT5G20740	-0.746096	-0.575159	-0.0794681	-1.1248	-0.521077
cluster1	AT1G61255	-1.02986	-0.282449	-0.602906	-0.83909	0.873869
cluster1	AT1G78510	-0.833728	-0.428304	-0.878863	-1.0258	-0.909431
cluster1	AT3G22670	-0.89981	-0.63555	-0.279619	-1.4765	-0.233924
cluster1	AT4G28630	-0.857141	-0.49489	-0.534657	-1.19977	-1.18831
cluster1	AT4G32460	-0.751375	-0.902987	-0.302503	-1.40053	-0.83859
cluster1	AT4G37320	-0.658356	0.182997	-0.462642	-1.12714	-1.06401
cluster1	AT5G60890	-0.892107	-0.303539	-0.456361	-1.25346	-0.0238965
cluster1	AT1G06450	-0.885683	-0.578878	-0.639346	-1.18959	-0.0974907
cluster1	AT1G26100	-0.690929	-0.537013	-0.207055	-1.05146	-0.369808
cluster1	AT1G54970	-0.534824	-1.11798	0.865057	-1.61035	-1.02531
cluster1	AT1G69780	-0.839677	-0.634584	-0.802044	-1.13736	-0.798291
cluster1	AT2G03090	-0.806903	-0.616947	-0.445718	-1.35904	-0.637162
cluster1	AT2G36400	-0.762845	-0.521965	-0.237194	-1.01973	-0.0177641
cluster1	AT2G47990	-0.854137	-0.75659	-0.62418	-1.34719	-0.534703
cluster1	AT4G17430	-0.719228	-0.477215	-0.547082	-1.1908	-0.864575
cluster1	AT1G20830	-0.562593	-0.519313	-0.337291	-1.02876	-1.03601
cluster1	AT1G53680	-0.668836	-1.01697	0.209485	-1.27783	-0.283878
cluster1	AT4G09510	-0.852344	-0.577739	-0.847831	-1.14027	-0.83909
cluster1	AT5G03120	-1.06266	-0.797719	-0.798801	-0.759119	-1.09897
cluster1	AT1G60600	-1.04305	-0.734052	-0.840444	-0.823165	-1.03392
cluster1	AT1G61900	-0.802448	-0.901016	-0.611877	-0.822848	-1.08539
cluster1	AT1G75420	-0.93968	-0.488564	-0.980201	-1.07348	-0.832365
cluster1	AT1G77920	-0.978528	-0.384823	-1.18284	-1.30158	-0.512302
cluster1	AT3G05430	-1.37703	-0.488036	-1.17377	-1.14454	-0.729746
cluster1	AT3G48800	-0.998985	-0.834187	-0.76501	-1.00288	-0.910345
cluster1	AT5G22860	-0.609246	-0.314583	-0.30623	-1.20369	-0.989361
cluster1	AT2G05760	-0.634077	-1.23281	-0.499717	-0.932049	-0.865707
cluster1	AT2G39560	-0.978796	-1.00879	-0.703583	-0.980074	-0.893482
cluster1	AT3G49840	-0.849979	-0.946134	-0.636915	-1.38649	-0.668335
cluster1	AT3G51530	-0.774661	-1.09858	-0.779124	-0.906374	-0.755221
cluster1	AT3G63200	-0.671645	-0.603906	0.0169054	-1.16917	-0.164106
cluster1	AT4G10620	-0.798353	-0.891428	-0.694601	-1.12803	-0.862713
cluster1	AT2G16800	-0.763379	-0.676969	-0.592426	-1.33488	-0.969336
cluster1	AT3G11070	-0.529284	-0.608455	-0.165026	-1.01693	-0.879127
cluster1	AT4G14480	-0.644644	-0.327166	-0.231592	-1.17974	-0.597964
cluster1	AT1G25425	-0.602827	0.0116751	0.330282	-1.222	-0.027043
cluster1	AT2G01913	-0.756028	-0.581594	-0.295451	-1.18267	-0.0991242
cluster1	AT4G34560	-0.633262	-0.229323	-0.32089	-1.10008	-0.598986
cluster1	AT5G47920	-0.60747	-0.198006	0.136464	-1.11914	-0.0609326
cluster1	AT2G36430	-0.499821	-0.175018	0.455292	-1.23264	-0.323189
cluster1	AT1G64580	-0.682741	-0.351743	-0.360324	-1.18824	-0.424338
cluster1	AT2G39180	-0.57032	-0.531432	-0.415776	-1.01744	-0.827804
cluster1	AT2G45160	-0.65179	-0.492654	-0.352521	-1.11871	-0.378982
cluster1	AT3G51060	-0.675032	-0.997962	-0.479294	-1.03134	-0.486375
cluster1	AT2G43480	-0.65359	0.311923	0.167903	-1.58578	0.112835
cluster1	AT2G46310	-0.749878	-0.408913	-0.563135	-1.3225	-0.524732
cluster1	AT3G56830	-0.686694	-0.170198	-0.666839	-1.17129	-0.740486
cluster1	AT1G46480	-0.578474	-0.510389	-0.147311	-1.22242	-0.537942
cluster1	AT1G68585	-0.524158	-0.577839	0.148147	-1.04786	0.137467
cluster1	AT1G74070	-0.649972	-0.470296	-0.537319	-1.10152	-0.655172
cluster1	AT5G51670	-0.55147	-0.512575	-0.214892	-1.04288	-0.444264
cluster1	AT1G02020	-0.538516	-0.449971	-0.115511	-1.15781	-0.54215
cluster1	AT1G05860	-0.666933	-0.832418	-0.618544	-1.04195	-0.762987
cluster1	AT2G02955	-0.684494	-0.557271	-0.460605	-1.226	-0.465169
cluster1	AT5G53730	-0.760356	-1.11907	-0.532307	-1.25244	-0.437802
cluster2	AT1G02450	3.01177	1.25011	3.29495	2.55386	2.46983
cluster2	AT1G03740	2.87416	2.1161	1.44061	2.65376	2.89567
cluster2	AT1G68330	2.58386	2.14732	2.04319	2.659	2.70019
cluster2	AT1G73080	2.91739	2.33408	1.52064	3.06428	2.66301
cluster2	AT1G73550	2.21789	1.56184	3.61012	2.91966	2.60027
cluster2	AT1G74590	2.34091	2.53503	1.90091	2.34748	3.23858
cluster2	AT1G76040	2.54026	2.42785	1.76146	2.81614	2.97692
cluster2	AT1G76430	2.00906	2.7744	2.411	2.81018	2.49562
cluster2	AT2G13650	2.76728	2.19188	2.10162	2.79605	2.55308
cluster2	AT2G24130	4.14247	3.05511	NaN	0.766199	NaN
cluster2	AT2G30550	2.41653	2.12125	2.0318	2.52102	3.05759
cluster2	AT2G32020	2.48456	2.03615	2.0876	2.30096	3.52522
cluster2	AT2G36210	2.50493	2.48894	2.34382	1.93038	3.4102
cluster2	AT2G36270	2.78867	2.54598	1.63737	2.98652	2.65888
cluster2	AT2G36950	1.94523	2.4124	1.76768	3.11603	2.87721
cluster2	AT2G41430	2.04791	2.16498	2.44748	3.28821	2.57328
cluster2	AT2G43120	2.82074	2.57933	1.7538	2.721	2.35787
cluster2	AT2G47060	2.67203	2.33541	2.46075	2.28727	2.88527
cluster2	AT3G08710	1.58828	2.74356	2.07193	3.15609	3.23999
cluster2	AT3G10815	2.6105	1.99462	1.57606	3.47275	2.86404
cluster2	AT3G10985	2.19426	2.49186	2.15249	2.55973	3.29172
cluster2	AT3G13432	2.42921	1.95636	2.37916	2.39727	3.15785
cluster2	AT3G15500	2.25867	2.56554	1.31855	3.37043	3.20862
cluster2	AT3G16860	2.42597	2.18005	1.92417	3.10521	2.86789
cluster2	AT3G17700	2.64525	2.30093	1.86996	3.22036	2.7107
cluster2	AT3G18710	1.91495	2.51282	2.13302	3.37794	2.65527
cluster2	AT3G18950	2.11758	2.51117	1.14106	3.18199	3.15809
cluster2	AT3G22260	2.49429	2.60082	1.94761	3.2729	2.73618
cluster2	AT3G23120	NaN	1.81716	3.26858	3.9339	1.77827
cluster2	AT3G44830	2.60751	2.47799	0.792811	3.16582	3.04857
cluster2	AT3G46930	2.76099	2.15471	1.62796	2.9517	2.79536
cluster2	AT3G49120	3.05955	1.97461	1.61681	3.04013	2.90967
cluster2	AT3G51660	1.96577	2.1823	2.69858	2.68755	3.59301
cluster2	AT3G51920	2.03603	2.43479	2.58053	2.96595	3.04905
cluster2	AT3G52430	3.17508	2.22135	1.91243	3.01419	2.76705
cluster2	AT3G53590	NaN	NaN	NaN	2.99968	NaN
cluster2	AT3G57240	2.88439	2.75996	2.23379	2.39592	2.732
cluster2	AT3G57740	3.17642	2.1528	2.2182	2.44755	3.13206
cluster2	AT4G02200	2.10297	2.14739	1.96167	2.91577	2.98302
cluster2	AT4G02380	1.78965	2.67561	2.39194	2.18487	3.28108
cluster2	AT4G05010	1.96848	2.93129	1.98639	3.04624	3.11851
cluster2	AT4G12350	2.90376	2.25239	2.99341	2.51066	2.86184
cluster2	AT4G14680	1.62741	2.57826	1.30811	2.96005	3.42811
cluster2	AT4G16500	1.89195	2.2165	2.25365	2.83158	3.56379
cluster2	AT4G17615	2.56556	2.43082	2.14278	2.90968	3.14874
cluster2	AT4G24380	2.09386	2.52842	1.33403	2.84648	3.375
cluster2	AT4G25670	NaN	2.27916	NaN	2.68082	3.33107
cluster2	AT4G25720	1.54808	2.57324	1.62459	3.54262	2.98929
cluster2	AT4G27280	2.36162	2.21106	2.00698	2.65893	3.29169
cluster2	AT4G27970	2.27913	2.91868	2.23231	2.49187	3.39395
cluster2	AT4G28140	NaN	0.917449	NaN	4.14232	NaN
cluster2	AT4G28550	2.37994	2.21075	1.27532	3.13604	3.04381
cluster2	AT4G32300	2.76624	2.30671	2.2625	3.27213	2.83052
cluster2	AT4G35590	2.79652	2.71096	1.57428	2.20128	NaN
cluster2	AT4G36490	NaN	NaN	NaN	2.92081	NaN
cluster2	AT4G38140	1.89982	2.75027	NaN	2.54554	3.81752
cluster2	AT4G38940	2.37278	2.46885	1.65352	2.74024	3.23161
cluster2	AT4G39950	2.83916	2.61409	0.866745	3.46802	3.28979
cluster2	AT5G03330	2.5438	2.26092	1.35954	2.8071	3.18064
cluster2	AT5G03700	2.22732	2.19422	2.84942	2.30547	2.92856
cluster2	AT5G04930	2.88552	2.14939	1.88816	2.84727	2.89838
cluster2	AT5G05340	2.35626	2.09458	1.80717	2.70435	3.21113
cluster2	AT5G05850	1.7113	2.45133	2.25209	3.04271	3.00732
cluster2	AT5G11970	2.12134	2.56805	2.54073	2.8872	3.369
cluster2	AT5G12880	2.09614	2.01397	2.09879	3.19982	2.95605
cluster2	AT5G16170	1.75261	2.10413	2.51443	3.04034	3.5634
cluster2	AT5G18150	2.53093	2.18442	1.78075	3.29022	2.67089
cluster2	AT5G25400	2.39978	NaN	NaN	NaN	NaN
cluster2	AT5G26340	2.64382	1.87392	2.4784	3.3042	3.01279
cluster2	AT5G37070	2.28063	2.07601	2.33449	3.15317	2.94223
cluster2	AT5G40540	2.46322	2.17061	1.98586	2.56204	3.30968
cluster2	AT5G42440	2.17162	2.13384	2.3952	2.58728	2.85259
cluster2	AT5G45340	2.80114	1.93	1.45152	3.54534	2.71095
cluster2	AT5G51190	2.42924	2.27181	0.929451	2.63433	3.67345
cluster2	AT5G52050	2.62352	2.29336	2.44792	2.63664	2.31875
cluster2	AT5G54810	1.90395	2.19244	1.71903	2.7965	3.4464
cluster2	AT5G55150	2.856	2.03697	3.01227	1.27871	3.50769
cluster2	AT5G57035	3.40002	2.27711	1.95665	2.85528	3.03287
cluster2	AT5G57123	2.79346	2.48497	1.89112	2.70216	3.65225
cluster2	AT5G61890	2.12998	1.58062	3.7364	1.88702	3.22264
cluster2	AT5G63790	2.42743	2.59127	1.72965	2.90213	3.23541
cluster2	AT5G64120	2.26313	1.62899	2.75012	2.75538	4.2041
cluster2	AT5G65130	2.67813	NaN	NaN	NaN	NaN
cluster2	AT5G66650	2.34226	2.28763	2.16551	3.64872	2.07915
cluster2	AT5G67350	1.96282	2.27637	2.05796	2.81808	3.46423
cluster2	AT1G02880	2.48034	1.93725	1.75802	3.20079	2.96363
cluster2	AT1G04100	2.21598	2.77537	2.08861	3.25411	3.00177
cluster2	AT1G11200	2.35677	2.1012	2.13428	3.64084	2.86076
cluster2	AT1G11310	2.95956	2.56895	2.07876	2.91818	2.77943
cluster2	AT1G12610	NaN	2.39953	NaN	NaN	NaN
cluster2	AT1G19770	2.63596	2.2921	2.18382	3.07316	2.67431
cluster2	AT1G22280	2.29854	2.43973	2.45458	3.0777	3.17803
cluster2	AT1G25370	2.63516	2.06813	1.86071	3.22948	2.88836
cluster2	AT1G27770	3.13083	2.09868	2.45205	2.78607	3.21416
cluster2	AT1G30720	2.61221	1.894	2.6866	2.85896	2.80981
cluster2	AT1G34420	2.91558	2.13243	1.82332	2.70436	3.20699
cluster2	AT1G48640	3.22036	1.94116	1.51686	3.08646	3.80372
cluster2	AT1G51790	3.00343	2.19197	2.38955	2.80194	3.48935
cluster2	AT1G53430	3.44954	2.38887	1.59511	2.76224	2.83105
cluster2	AT1G55365	1.72304	2.48174	2.55794	2.79021	3.28849
cluster2	AT1G56540	1.95061	2.279	1.00678	3.40167	3.92787
cluster2	AT1G59590	1.88322	2.57211	2.96388	3.69169	2.98795
cluster2	AT1G60783	NaN	NaN	3.64968	NaN	2.15977
cluster2	AT1G62422	2.23895	2.27747	2.4973	3.08227	3.21431
cluster2	AT1G63245	1.88351	1.99981	3.77981	2.67721	3.85877
cluster2	AT1G67060	2.50218	2.1751	2.26052	2.72939	3.07475
cluster2	AT1G70530	3.4115	2.32491	2.32287	3.0133	2.20303
cluster2	AT1G70920	2.60168	2.41801	2.38031	3.23632	3.01785
cluster2	AT1G71697	2.55093	2.51499	2.36347	3.21123	3.2431
cluster2	AT1G73965	2.87315	1.93541	2.25737	2.7854	3.54122
cluster2	AT1G74080	3.24699	2.18504	1.86209	2.66204	3.13933
cluster2	AT1G74330	2.96623	2.27388	1.4859	2.97402	3.22998
cluster2	AT1G76130	2.17411	2.28785	1.55627	3.1774	3.50328
cluster2	AT1G78830	2.71919	2.35113	2.65848	2.90439	2.95772
cluster2	AT2G01340	2.6507	2.37632	1.94359	3.09103	3.10223
cluster2	AT2G06050	2.37452	2.86999	1.57224	3.0253	2.95312
cluster2	AT2G20142	2.22392	2.31759	2.11249	2.34271	3.71545
cluster2	AT2G24570	2.56973	2.41972	2.65449	2.83184	2.94697
cluster2	AT2G30720	2.81591	2.77171	1.727	3.28322	3.05575
cluster2	AT2G31880	3.14688	2.30354	2.74188	2.75745	3.18
cluster2	AT2G32660	2.60465	4.57058	2.42279	2.35387	1.98359
cluster2	AT2G32800	2.76165	1.8317	2.58073	3.67481	2.30485
cluster2	AT2G34390	NaN	1.81539	2.90659	NaN	3.3076
cluster2	AT2G38290	2.34499	2.28346	2.4434	2.32412	3.81541
cluster2	AT2G38860	2.0754	2.75128	1.85711	3.21342	3.63639
cluster2	AT2G39650	2.60222	2.34668	1.79524	2.92704	3.62438
cluster2	AT2G41835	2.62694	2.46172	2.24056	2.9087	2.93858
cluster2	AT2G41880	2.50712	2.65726	1.69545	3.13585	3.48094
cluster2	AT2G46430	2.98861	3.09019	2.46286	2.1144	3.24316
cluster2	AT2G46620	2.43308	2.77155	2.1513	3.22962	3.53758
cluster2	AT2G46940	2.43293	2.20326	2.51496	2.90569	3.50023
cluster2	AT2G47550	3.00095	1.96404	3.15817	2.86278	3.4621
cluster2	AT3G05580	2.82771	2.41676	2.2942	3.41095	3.23151
cluster2	AT3G12040	2.39366	2.12331	1.96928	3.0769	3.38101
cluster2	AT3G16720	2.51586	2.52275	2.0825	2.61923	3.69588
cluster2	AT3G25600	1.93939	2.43894	2.55172	3.07729	3.33016
cluster2	AT3G25882	2.67132	2.09858	2.4606	2.89638	3.70516
cluster2	AT3G47380	1.40222	2.4493	2.79112	3.16213	3.49753
cluster2	AT3G57280	2.45263	2.58102	2.41763	3.22766	3.6979
cluster2	AT3G57550	2.74687	2.29594	2.1897	3.11135	2.99526
cluster2	AT4G08850	2.75857	2.22698	2.87117	2.43813	3.83315
cluster2	AT4G13510	2.64652	2.08904	2.55596	2.73907	3.51697
cluster2	AT4G17500	2.65801	2.35121	1.74529	3.04483	3.59426
cluster2	AT4G18950	2.75383	2.41668	1.88791	3.43847	3.35724
cluster2	AT4G19370	2.81761	2.73222	2.13592	2.6669	3.16865
cluster2	AT4G20860	3.35466	2.07357	2.78815	2.69203	3.17495
cluster2	AT4G21120	2.76394	2.24968	3.23242	3.12193	2.90314
cluster2	AT4G21865	2.66725	2.23752	1.58867	2.63334	4.36914
cluster2	AT4G22530	2.82687	2.60373	2.82683	1.78782	3.82075
cluster2	AT4G25030	2.54903	2.75684	2.33842	3.35223	3.37495
cluster2	AT4G25110	2.54583	2.01673	2.62032	3.0141	3.83328
cluster2	AT4G25900	2.74731	2.76984	2.10375	3.75257	3.06827
cluster2	AT4G26120	2.77376	2.53474	2.26077	2.87914	3.51104
cluster2	AT4G29740	1.99969	3.36495	1.54427	3.32272	3.48123
cluster2	AT4G30530	1.6797	2.55832	1.74975	3.64987	3.64516
cluster2	AT4G31020	2.64936	1.98224	1.79129	4.17109	3.14588
cluster2	AT4G34180	2.46707	2.60079	2.41223	3.32489	3.64952
cluster2	AT4G34390	3.12302	2.43275	1.83397	3.04048	3.10698
cluster2	AT4G36030	3.18258	2.54574	2.31018	3.01095	2.99548
cluster2	AT4G39940	1.84322	2.81608	1.69044	3.7744	3.61505
cluster2	AT5G02290	2.72361	2.45211	2.34821	3.33889	3.24623
cluster2	AT5G02970	2.91693	2.46924	1.65029	3.53185	3.04769
cluster2	AT5G08790	3.28498	2.70636	2.10785	2.73226	3.61774
cluster2	AT5G13080	2.32151	2.45809	1.73586	4.30413	2.784
cluster2	AT5G18490	3.0615	2.62322	2.32883	2.93635	3.11774
cluster2	AT5G22540	3.92622	3.1598	1.3457	3.1783	2.66286
cluster2	AT5G23160	2.26969	0.961149	0.745546	4.44825	4.70436
cluster2	AT5G26030	2.95831	2.44985	2.48783	3.01073	3.47038
cluster2	AT5G47230	2.64205	2.49522	2.27586	3.05932	3.66552
cluster2	AT5G47960	2.5906	3.04292	2.39559	2.61521	3.50851
cluster2	AT5G48380	3.16825	2.41639	2.76237	3.09007	3.18645
cluster2	AT5G55120	2.42847	2.8964	1.80237	4.01698	2.92272
cluster2	AT5G59820	2.21737	2.20644	1.68891	3.15818	4.22176
cluster2	AT5G61210	2.8843	2.62495	2.45355	3.308	3.12175
cluster2	AT5G64750	2.10597	2.73532	2.15767	3.0736	4.54703
cluster2	AT5G65300	2.65419	2.91436	1.85585	2.80561	3.67786
cluster2	AT5G66070	2.9837	2.39442	2.15774	3.23227	3.48654
cluster2	AT5G66210	3.08072	2.57692	2.26846	3.27688	3.51397
cluster2	AT5G66890	2.91677	2.44726	NaN	3.22166	NaN
cluster2	AT1G01480	3.283	3.12552	2.91327	2.8616	2.58685
cluster2	AT1G03370	3.2681	2.22384	2.09319	3.15015	3.08522
cluster2	AT1G14040	2.93189	3.09738	1.82378	3.49435	3.15858
cluster2	AT1G15190	2.95328	2.32037	2.70065	3.85152	2.95948
cluster2	AT1G20510	2.33533	2.67617	2.0015	3.51023	3.76182
cluster2	AT1G30620	3.09693	2.50793	2.19194	3.37976	3.38966
cluster2	AT1G32928	2.4526	2.70214	2.81341	3.59236	3.45542
cluster2	AT1G33590	2.86725	2.71594	2.6498	3.16673	3.40926
cluster2	AT1G51660	2.66551	2.61667	2.46663	3.32276	3.86189
cluster2	AT1G61340	2.78299	3.29876	1.99097	3.24025	3.5302
cluster2	AT1G63720	3.31233	2.90931	2.47208	2.88965	2.91899
cluster2	AT1G64160	2.24543	3.87932	0.886984	2.71846	4.66749
cluster2	AT1G64710	2.44149	2.61776	2.90637	3.47186	3.19388
cluster2	AT1G68340	2.62611	2.76505	2.2298	3.71305	3.25711
cluster2	AT1G68450	4.06339	2.79531	2.13104	3.17955	2.81996
cluster2	AT1G70420	2.81876	2.75915	2.54624	3.59864	2.84686
cluster2	AT1G73805	3.72552	2.28796	2.33563	2.70531	3.14412
cluster2	AT1G75000	2.71284	2.9049	2.23949	2.75833	3.55057
cluster2	AT1G80450	2.48578	2.85824	2.18592	3.38677	3.40284
cluster2	AT2G02220	3.22849	2.41815	2.69875	3.38117	2.83975
cluster2	AT2G15760	2.53939	3.18744	1.88	2.98026	3.66817
cluster2	AT2G17705	2.43758	2.62419	2.48385	2.77084	3.89528
cluster2	AT2G19130	2.85502	2.23721	2.34297	3.633	3.20187
cluster2	AT2G23680	2.75276	2.52298	2.57924	2.45843	4.14829
cluster2	AT2G26190	3.53774	2.0466	2.46663	3.24771	3.33063
cluster2	AT2G27690	1.64405	3.42528	2.71001	3.38086	3.7132
cluster2	AT2G28400	2.79367	2.31859	2.67429	3.1187	3.99378
cluster2	AT2G31990	3.11018	2.38955	2.4841	3.66391	2.89891
cluster2	AT2G36470	2.83445	2.3388	2.46149	3.15131	3.69559
cluster2	AT2G39660	2.88109	2.58602	2.74488	3.0532	3.62378
cluster2	AT3G10720	3.05844	2.5193	3.00779	3.55387	3.09777
cluster2	AT3G14710	NaN	NaN	NaN	NaN	3.42347
cluster2	AT3G18830	2.81245	2.81463	2.71315	2.96243	3.31743
cluster2	AT3G19260	3.21527	2.66786	2.54956	2.97997	3.6222
cluster2	AT3G21150	2.84643	2.79898	2.64884	3.37177	3.65816
cluster2	AT3G21230	3.43519	2.40885	2.40201	3.55412	3.22479
cluster2	AT3G21630	3.223	2.91169	2.5108	3.59403	2.9148
cluster2	AT3G22160	2.50824	2.62874	2.5985	2.86641	3.84743
cluster2	AT3G25250	3.01608	3.11146	1.55046	3.09669	3.51165
cluster2	AT3G25900	3.00305	2.55308	2.36276	4.0045	3.09351
cluster2	AT3G26680	3.06111	2.73879	2.41365	3.10371	3.31188
cluster2	AT3G44350	2.15549	2.73858	3.50011	NaN	3.70593
cluster2	AT3G47550	2.78549	2.61535	2.46311	3.21701	3.60697
cluster2	AT3G53150	3.3383	2.23188	2.81725	4.56639	2.33251
cluster2	AT3G53810	3.36575	2.6052	2.63762	3.42829	3.03301
cluster2	AT3G55150	4.37553	2.37365	2.66586	2.87468	2.54769
cluster2	AT3G56880	2.993	2.93771	3.29586	2.98737	3.03473
cluster2	AT3G57330	3.29213	2.52738	1.94861	3.55425	3.45106
cluster2	AT3G59880	2.05447	3.29721	3.13317	2.70628	3.87736
cluster2	AT3G60690	2.46837	2.73429	2.57425	3.14798	3.88646
cluster2	AT4G00305	2.30067	2.60293	2.21542	5.10444	2.64602
cluster2	AT4G11330	2.45947	2.64929	3.00454	3.69112	3.23258
cluster2	AT4G11850	3.0005	2.85673	2.17097	3.50367	3.6118
cluster2	AT4G18205	2.57474	2.80989	3.34139	3.06754	3.39587
cluster2	AT4G24310	2.70296	2.23351	2.57699	3.95492	3.21249
cluster2	AT4G37390	3.98346	2.44494	1.47361	4.51635	2.13613
cluster2	AT4G39030	3.01185	2.82341	2.08176	3.64451	3.78178
cluster2	AT5G01760	2.98283	3.33398	1.11956	3.98897	2.90735
cluster2	AT5G04310	2.76392	2.91358	2.7387	3.2491	3.29649
cluster2	AT5G13190	2.13576	3.02063	2.74562	3.27554	3.76372
cluster2	AT5G27760	2.59139	2.92797	2.09622	3.01585	4.10979
cluster2	AT5G39000	3.52262	2.98715	2.20352	3.88455	2.75396
cluster2	AT5G39670	3.61351	2.40711	2.44913	2.66371	3.81713
cluster2	AT5G41100	3.38134	2.70047	2.5599	3.44628	3.44016
cluster2	AT1G16670	3.10154	3.00885	2.56522	3.33699	3.25279
cluster2	AT1G21010	3.01787	2.95104	2.45831	3.40652	3.872
cluster2	AT1G25220	3.03132	2.68625	1.99411	3.53592	3.59288
cluster2	AT1G25400	2.71587	3.06699	2.34933	3.62438	3.64381
cluster2	AT1G30740	2.77999	2.65356	2.68543	4.41601	2.94022
cluster2	AT1G32920	2.69087	2.96055	2.11087	3.46755	3.9417
cluster2	AT1G44130	4.24889	1.83633	3.45087	3.19888	2.95652
cluster2	AT1G52200	2.7021	2.83307	3.21992	3.03589	3.93197
cluster2	AT1G61800	2.00702	3.16513	1.44889	3.82565	4.58375
cluster2	AT1G66160	2.36101	3.28649	2.84418	3.30493	3.42466
cluster2	AT1G66480	3.28364	2.31097	2.89019	3.61077	3.8092
cluster2	AT1G66880	3.32491	2.71099	2.64316	3.02047	3.72458
cluster2	AT2G04515	2.65086	2.40966	2.79415	3.73027	3.65359
cluster2	AT2G25460	2.87689	3.12054	2.40884	3.28803	3.78055
cluster2	AT2G31230	2.57356	3.11762	1.9619	3.25156	4.19344
cluster2	AT2G31865	2.83115	3.05168	2.90306	3.56677	3.58914
cluster2	AT2G32240	3.60893	2.71373	1.9828	3.39764	3.93477
cluster2	AT3G13850	NaN	NaN	2.50762	NaN	NaN
cluster2	AT3G13950	3.10448	2.31367	2.923	3.30495	3.97018
cluster2	AT3G27970	2.26509	NaN	NaN	4.50221	3.40655
cluster2	AT3G47820	2.84572	2.74717	2.66579	3.72523	3.64305
cluster2	AT3G48450	2.80152	3.77745	1.65833	4.36357	3.00205
cluster2	AT3G57530	3.50373	2.79501	2.22252	3.35659	3.52174
cluster2	AT3G58490	2.88586	3.0418	2.49622	4.16267	2.90786
cluster2	AT4G11280	3.40115	2.73658	2.19559	3.14515	4.43107
cluster2	AT4G22640	3.5303	3.23313	2.42055	3.07158	3.64162
cluster2	AT4G36950	2.67449	4.26297	2.60759	4.18326	2.36788
cluster2	AT5G26920	4.64743	2.67664	2.65148	2.96879	3.25756
cluster2	AT5G38900	2.62477	2.73095	2.55765	3.36016	4.66013
cluster2	AT5G42380	2.97189	3.35044	1.67553	3.06393	4.83519
cluster2	AT5G63130	2.77256	2.85966	2.24896	3.62431	4.14376
cluster2	AT1G10040	3.37895	2.97408	1.44087	3.87053	3.94844
cluster2	AT1G15430	3.12465	2.92623	2.47263	3.5876	3.98173
cluster2	AT1G21326	3.20663	2.91091	3.08199	3.59382	3.44847
cluster2	AT1G24150	3.20331	3.11879	2.69469	3.68534	3.5784
cluster2	AT1G25390	3.51799	2.78839	2.36073	3.53166	3.60073
cluster2	AT1G53990	2.58436	3.8479	1.98324	3.48732	3.88412
cluster2	AT1G59870	3.51338	2.84607	2.84641	3.02367	3.7463
cluster2	AT1G70140	3.40661	3.33113	2.93239	2.96157	3.68846
cluster2	AT2G29410	3.51365	2.76027	1.76024	4.48922	3.22061
cluster2	AT2G40140	3.65951	3.06502	2.37278	3.39414	3.66623
cluster2	AT2G41342	3.21655	3.53768	2.14952	3.84374	3.47443
cluster2	AT2G44840	2.28035	3.92871	1.95756	3.13024	4.62826
cluster2	AT3G26980	2.90204	3.07979	2.9071	3.56804	3.94704
cluster2	AT3G50760	2.99566	2.84929	3.36972	3.49353	3.78498
cluster2	AT3G54420	2.18622	2.85684	3.8501	4.84491	2.93228
cluster2	AT3G55470	2.76421	2.39799	2.29195	4.42121	4.32999
cluster2	AT4G11000	2.52819	2.8838	NaN	NaN	4.65376
cluster2	AT4G18430	3.1285	2.8913	2.96887	4.06341	3.47726
cluster2	AT4G22980	4.05229	2.71083	2.7608	3.04193	3.68776
cluster2	AT5G05190	3.40103	2.62775	3.38665	3.4926	3.71859
cluster2	AT5G06320	3.09409	3.04119	3.09536	3.43502	3.95389
cluster2	AT5G11670	3.43497	2.87674	2.67991	3.51143	3.80199
cluster2	AT5G15870	3.21146	2.56154	3.07025	3.57031	4.15227
cluster2	AT5G54490	2.96059	3.06291	2.53721	4.0381	3.97538
cluster2	AT1G08940	2.85018	3.11301	2.63592	3.88263	3.90506
cluster2	AT1G10417	2.92029	2.78487	2.53909	4.35669	3.81278
cluster2	AT1G14370	3.60017	2.91205	2.8627	3.23234	3.86726
cluster2	AT1G14870	3.3503	2.34361	3.17805	3.45449	4.28879
cluster2	AT1G15530	3.35333	3.08919	2.80311	3.6123	3.86213
cluster2	AT1G23710	3.21013	2.96621	2.51123	3.79116	3.85098
cluster2	AT1G28380	3.61281	3.02197	2.60929	3.55105	3.75144
cluster2	AT1G51800	3.47777	2.71985	3.15514	3.23254	4.10553
cluster2	AT1G65690	3.73945	3.0346	3.3634	3.54238	2.9477
cluster2	AT1G67856	2.6625	2.73733	3.56944	4.01739	3.9458
cluster2	AT1G72280	2.89141	3.08321	2.5345	3.76991	4.1189
cluster2	AT2G27660	3.18747	2.6887	3.54905	3.83616	3.73723
cluster2	AT2G39400	3.01932	2.97193	3.30906	3.5665	4.01516
cluster2	AT2G41010	2.92727	3.149	3.07502	3.44425	4.16454
cluster2	AT2G46400	3.74704	2.94311	2.42898	3.42586	3.98141
cluster2	AT3G07390	2.9723	3.01217	3.11689	3.6559	4.2515
cluster2	AT3G09020	3.50342	2.82547	2.49556	3.77548	3.83861
cluster2	AT3G09830	3.28436	3.1425	2.85191	3.52304	3.95355
cluster2	AT3G27415	NaN	3.06428	NaN	NaN	NaN
cluster2	AT3G28850	2.20955	3.1703	3.17765	3.91381	4.35194
cluster2	AT3G50930	3.70672	2.90978	2.31326	3.05777	4.66665
cluster2	AT4G08555	3.31275	2.33917	2.46971	3.35907	5.29015
cluster2	AT4G18880	3.3802	3.1732	2.60771	3.40492	4.32716
cluster2	AT4G26200	3.21008	2.49137	4.01581	3.32178	3.95289
cluster2	AT4G27980	3.55324	3.05261	2.35413	3.50415	4.18275
cluster2	AT4G28703	3.02029	2.69815	3.71137	3.82503	4.04932
cluster2	AT4G30090	3.25833	3.52524	3.20342	3.87324	3.35809
cluster2	AT5G46350	3.67628	2.1582	4.08676	4.20424	3.01359
cluster2	AT5G64900	2.49478	3.34855	2.9616	4.39907	3.66144
cluster2	AT1G29690	3.3396	3.06542	2.93078	3.612	3.9784
cluster2	AT1G42990	2.54628	2.78144	2.96798	3.77798	5.00105
cluster2	AT1G51700	2.76111	3.55843	3.24031	3.43585	4.15346
cluster2	AT1G67810	2.95802	3.43422	2.97388	2.4408	5.20559
cluster2	AT1G68390	4.01237	3.27949	2.18554	3.94828	3.34476
cluster2	AT2G01180	3.07956	3.01651	2.73016	3.83016	4.27509
cluster2	AT2G23320	2.98577	2.89724	3.18213	3.66049	4.24927
cluster2	AT2G34930	3.66469	3.54966	2.99481	3.6827	3.33919
cluster2	AT2G37940	3.37638	2.58713	2.87827	4.14277	4.13601
cluster2	AT3G09010	3.52133	3.05384	2.25408	3.84516	4.14855
cluster2	AT3G44720	3.75789	3.20821	2.85651	3.28132	3.95335
cluster2	AT4G22690	2.59376	3.39597	2.97817	4.57769	3.69635
cluster2	AT5G17350	3.0174	3.00671	2.72987	4.18096	4.3908
cluster2	AT5G43420	3.44318	3.42901	2.88433	3.78378	3.84483
cluster2	AT1G14260	3.68304	2.68989	3.32839	4.23107	3.59468
cluster2	AT1G17420	2.99997	3.44226	3.31144	3.79313	3.94104
cluster2	AT1G65240	2.90164	3.81729	3.3312	3.79523	3.68275
cluster2	AT1G75450	3.11277	3.05554	2.42298	4.8938	3.7107
cluster2	AT3G55950	3.59656	3.43332	2.68264	3.81195	3.87162
cluster2	AT3G59080	3.58146	3.52564	2.81682	3.82487	3.76288
cluster2	AT3G61190	3.53735	2.61935	1.79016	4.04302	5.03926
cluster2	AT5G49520	3.70088	3.02081	2.9322	3.72826	4.23208
cluster2	AT1G29290	3.49728	3.46737	2.3827	3.55766	4.55102
cluster2	AT2G23770	3.37169	3.52847	2.94961	3.80589	4.04449
cluster2	AT2G39518	3.11518	3.03163	3.74201	3.63634	4.34761
cluster2	AT2G40000	3.49163	2.93753	2.85647	4.72136	3.56953
cluster2	AT3G21070	3.66048	3.22605	2.98365	4.31777	3.53933
cluster2	AT4G01010	3.6651	3.10709	2.3047	4.09067	4.20899
cluster2	AT4G39230	3.43334	3.41772	2.70949	4.00407	4.02077
cluster2	AT5G25260	5.18061	2.9215	3.28014	3.99033	2.36621
cluster2	AT5G42830	3.65392	3.1729	3.8203	3.41565	4.06211
cluster2	AT5G66790	3.68832	3.41521	3.10435	3.38634	4.31369
cluster2	AT1G28480	2.75149	3.3224	2.69105	4.37307	4.45455
cluster2	AT1G62420	2.75215	2.67624	2.72166	5.28615	4.23656
cluster2	AT3G02550	3.50612	2.98874	2.67492	4.43	4.01747
cluster2	AT3G21700	2.8194	3.42744	2.94222	4.15965	4.5685
cluster2	AT4G37640	4.31955	3.04905	2.7766	3.75045	3.95901
cluster2	AT5G12930	3.94491	3.34971	3.16448	3.99567	3.54376
cluster2	AT5G24600	3.56957	3.49811	2.42694	4.5936	3.56298
cluster2	AT5G25930	3.91628	3.5144	2.79693	3.49462	4.23854
cluster2	AT5G28646	3.69445	3.43782	1.89691	4.20677	4.35104
cluster2	AT3G53770	4.25094	2.33304	NaN	5.30447	3.05988
cluster2	AT4G25350	3.9977	2.94765	3.04023	4.23979	3.72096
cluster2	AT4G40080	3.34323	3.42963	2.78336	4.09218	4.34762
cluster2	AT1G73810	3.37676	3.67857	2.62953	3.45881	4.86496
cluster2	AT2G32680	3.43734	2.90665	3.89909	3.20857	4.97477
cluster2	AT3G18690	3.27053	3.33668	3.07048	3.92096	4.54023
cluster2	AT3G26910	3.98039	3.33032	2.83319	3.70175	4.19022
cluster2	AT3G28580	5.17649	1.14999	-0.114577	4.9077	5.65325
cluster2	AT3G59700	4.01459	2.85165	2.17144	4.49984	4.1769
cluster2	AT4G20000	3.09069	3.11108	4.08788	3.80433	4.39252
cluster2	AT4G34150	3.52301	3.25511	3.12318	3.84886	4.48783
cluster2	AT5G01830	3.3294	3.35678	2.28287	4.39459	4.51784
cluster2	AT3G56500	3.74193	2.80718	2.67925	5.08724	3.75238
cluster2	AT1G76610	NaN	2.9945	2.82588	NaN	4.64276
cluster2	AT4G35480	3.43513	3.15211	3.67027	4.39025	3.94784
cluster2	AT1G33030	3.17831	3.70828	3.012	3.6447	4.90864
cluster2	AT1G51890	4.14965	2.76731	3.13308	3.92861	4.43991
cluster2	AT3G16530	2.91304	3.65305	3.42515	3.88273	4.71643
cluster2	AT5G12340	3.40516	3.44052	2.27372	4.65691	4.35437
cluster2	AT3G11820	3.43251	3.47216	3.03586	4.12674	4.428
cluster3	AT5G43270	-0.99621	-0.390015	-0.895478	-0.970387	-1.22858
cluster3	AT5G43920	-0.687858	-0.944622	-0.95186	-1.06954	-1.07589
cluster3	AT5G53500	-0.630128	-1.05308	-0.764276	-1.19925	-1.11986
cluster3	AT5G60050	-0.779874	-0.690727	-0.517176	-1.44379	-1.03296
cluster3	AT5G60450	-0.732511	-1.1123	-0.983392	-1.10072	-0.834229
cluster3	AT5G66820	-0.753045	-0.678005	-0.847849	-1.16123	-0.984706
cluster3	AT1G02610	-0.933037	-1.20329	-0.72946	-0.639725	-1.24837
cluster3	AT1G17040	-0.568961	-0.603951	-0.988001	-1.22605	-1.66452
cluster3	AT1G20370	-0.577452	-0.908582	-0.683222	-1.27852	-1.30134
cluster3	AT1G27410	-0.566619	-0.845375	-0.555068	-1.28351	-1.37725
cluster3	AT1G29530	-0.7332	-0.748519	-0.926046	-0.979638	-1.45862
cluster3	AT1G30210	-0.983571	-0.700084	-0.757755	-1.11853	-1.01234
cluster3	AT1G49740	-0.755702	-0.796624	-0.842559	-1.36299	-0.997775
cluster3	AT1G60060	-1.04301	-1.02029	-1.33837	-0.871405	-0.385101
cluster3	AT1G60790	-0.36062	-1.06812	-0.867197	-1.33726	-1.2996
cluster3	AT1G60800	-0.586565	-1.09227	-1.34487	-0.960223	-1.33493
cluster3	AT1G62350	-1.04125	-0.623961	-0.707148	-0.950497	-1.42903
cluster3	AT1G64860	-0.951894	-0.656873	-1.09405	-0.817802	-1.32791
cluster3	AT1G65320	-0.677867	-1.07417	-0.837388	-0.995315	-1.03455
cluster3	AT1G65380	-0.909262	-0.808892	-0.780116	-1.24791	-0.854369
cluster3	AT1G66140	-0.80478	-0.910643	-0.924895	-1.09623	-0.939182
cluster3	AT1G67440	-0.687246	-1.10382	-0.674195	-0.888714	-1.48732
cluster3	AT1G69040	-0.588859	-1.00327	-1.26743	-1.22132	-1.08818
cluster3	AT1G69160	-0.851759	-0.758495	-0.765799	-1.10182	-1.13634
cluster3	AT1G72090	-0.457441	-1.03709	-1.31836	-1.28264	-1.05726
cluster3	AT1G73320	-1.06059	-0.817468	-0.891606	-0.870182	-1.05511
cluster3	AT1G73340	-0.361586	-0.920186	-0.621977	-1.29703	-1.84689
cluster3	AT1G74160	-0.427037	-0.851067	-0.936891	-1.60027	-1.13314
cluster3	AT1G79030	-0.704305	-0.915156	-0.949491	-1.06075	-1.06575
cluster3	AT2G02150	-0.738787	-0.479269	-0.987917	-1.2629	-1.22845
cluster3	AT2G04270	-0.545625	-0.84181	-1.37059	-1.24885	-1.36176
cluster3	AT2G15820	-0.611932	-0.823715	-1.10267	-1.14973	-1.46596
cluster3	AT2G19170	-0.372222	-1.30512	-1.01578	-1.18203	-1.44504
cluster3	AT2G23470	-1.10425	-0.745898	-0.972894	-0.9451	-0.93155
cluster3	AT2G26640	-0.905829	-0.981031	-0.860668	-1.15151	-1.00549
cluster3	AT2G28070	-0.634466	-0.796475	-0.995183	-1.37267	-1.18547
cluster3	AT2G29670	-0.944531	-0.664644	-0.965839	-0.955516	-1.00129
cluster3	AT2G32450	-0.795508	-1.01326	-0.890042	-1.00666	-1.19523
cluster3	AT2G33330	-1.13768	-0.915969	-0.908978	-0.853511	-1.01975
cluster3	AT2G37930	-0.759409	-0.9673	-0.396886	-1.29198	-1.05725
cluster3	AT2G40570	-0.795273	-0.610911	-1.31354	-1.35193	-0.676548
cluster3	AT2G41330	-0.964924	-0.676342	-1.19189	-1.13249	-1.0474
cluster3	AT2G41705	-0.858626	-0.50797	-0.963551	-1.31638	-1.10404
cluster3	AT2G42200	-0.552824	-1.43265	-0.595777	-1.4247	-1.0446
cluster3	AT2G42290	-0.392813	-0.863381	-1.24519	-1.50349	-1.18598
cluster3	AT2G42960	-0.763425	-0.871333	-0.864714	-1.17619	-1.31662
cluster3	AT2G45810	-0.770756	-0.790766	-0.814693	-1.23254	-1.11697
cluster3	AT2G45850	-0.859759	-1.00863	-0.977708	-0.927377	-1.1582
cluster3	AT3G02930	-0.326568	-1.65591	-1.03427	-1.31822	-0.964854
cluster3	AT3G04290	-1.00886	-0.907807	-0.629273	-1.22922	-1.03014
cluster3	AT3G05100	-1.03845	-0.871112	-0.795667	-1.13887	-0.984645
cluster3	AT3G08010	-0.85664	-0.91527	-0.617954	-1.16343	-1.18014
cluster3	AT3G09650	-0.49165	-0.98588	-1.20208	-1.35734	-1.09412
cluster3	AT3G10440	-0.568663	-1.05379	-0.564719	-1.28919	-1.43188
cluster3	AT3G13510	-0.677605	-0.860878	-0.991702	-1.20876	-1.14248
cluster3	AT3G17470	-0.621145	-0.589747	-0.86637	-1.21707	-1.5169
cluster3	AT3G23020	-0.0897365	-1.03463	-0.522387	-1.81045	-1.50424
cluster3	AT3G23730	-0.963496	-1.12782	-0.711045	-1.09288	-1.01884
cluster3	AT3G24520	-1.04277	-0.942825	-1.21066	-1.29586	-0.334947
cluster3	AT3G27170	-0.842929	-1.17913	-0.882451	-1.09353	-1.08297
cluster3	AT3G27640	-0.572889	-0.773005	-1.30109	-1.23462	-1.40694
cluster3	AT3G47500	-0.548978	-0.936412	-0.86445	-1.62734	-1.16949
cluster3	AT3G49730	-0.264642	-1.10292	-1.05043	-1.61573	-1.48147
cluster3	AT3G51950	-0.691087	-0.935829	-1.13524	-1.05683	-1.24208
cluster3	AT3G52720	-0.698657	-0.983338	-0.73065	-1.23231	-1.20757
cluster3	AT3G53800	-0.754973	-0.720555	-0.89046	-1.70179	-0.962604
cluster3	AT3G56100	-0.729025	-0.92741	-0.444448	-1.46631	-0.896253
cluster3	AT3G57190	-0.887678	-0.558438	-0.933853	-1.02414	-1.49242
cluster3	AT3G61970	-0.954975	-0.679017	-0.656423	-1.32836	-1.02559
cluster3	AT3G62470	NaN	-1.0321	-0.841117	-1.20187	-0.977367
cluster3	AT3G63290	-0.889512	-1.0623	-0.604989	-1.42347	-0.974969
cluster3	AT4G00040	-0.694267	-0.861599	-1.00145	-1.26293	-1.11822
cluster3	AT4G00480	-0.622931	-0.531669	-0.702222	-1.60162	-1.68082
cluster3	AT4G02920	-0.976202	-0.8981	-0.95742	-0.973147	-1.29712
cluster3	AT4G09900	-1.10667	-0.634812	-0.932994	-0.87812	-1.21378
cluster3	AT4G12420	-0.579437	-0.930053	-1.0139	-1.12708	-1.43901
cluster3	AT4G15430	-0.504873	-1.48149	-1.72753	-1.04066	-0.988583
cluster3	AT4G15820	-0.48524	-1.23504	-1.50603	-1.35094	-0.990014
cluster3	AT4G16390	-1.03433	-0.858148	-0.669993	-1.13781	-1.0599
cluster3	AT4G20940	-0.385692	-1.09477	-1.0436	-1.51265	-1.16251
cluster3	AT4G22730	-0.28149	-0.867056	-1.61594	-1.71996	-1.05062
cluster3	AT4G23290	-0.673094	-0.979128	-0.864776	-1.28907	-1.23064
cluster3	AT4G23740	-0.64754	-1.01939	-1.05143	-0.96763	-1.24151
cluster3	AT4G24670	-0.714687	-1.02019	-1.0676	-0.941552	-1.09342
cluster3	AT4G24790	-0.713834	-1.18458	-1.19892	-1.41011	-0.6866
cluster3	AT4G25620	-0.983073	-0.682043	-0.86264	-1.26312	-0.991911
cluster3	AT4G26540	-0.553773	-1.11906	-1.40305	-1.13538	-1.40445
cluster3	AT4G26800	-0.594529	-0.430548	-0.888819	-1.8151	-1.48379
cluster3	AT4G28180	-0.557093	-1.45464	-0.43206	-1.5197	-0.874649
cluster3	AT4G32570	-0.890743	-0.728381	-0.92517	-1.26037	-0.948513
cluster3	AT4G35470	-0.620286	-1.09137	-1.15902	-1.18102	-1.50356
cluster3	AT4G38170	-0.871268	-0.674618	-1.23596	-1.31466	-1.23843
cluster3	AT4G38690	-0.861851	-1.11061	-0.586724	-1.25953	-1.0663
cluster3	AT4G39010	-0.932634	-1.20923	-1.21701	-0.788136	-0.764657
cluster3	AT4G39330	-1.03327	-1.00409	-0.706838	-1.09338	-1.20628
cluster3	AT4G39400	-0.739448	-0.982883	-0.913506	-1.301	-1.2487
cluster3	AT5G02180	-0.972893	-0.827807	-0.79978	-1.04397	-1.27526
cluster3	AT5G02480	-0.711279	-0.767021	-0.995508	-1.32578	-0.851104
cluster3	AT5G02710	-1.06131	-0.787316	-0.951676	-0.999927	-1.35233
cluster3	AT5G06480	-1.31875	-1.0878	-1.0801	-0.492742	-1.15841
cluster3	AT5G08010	-0.754079	-0.919272	-1.06876	-1.06829	-1.27863
cluster3	AT5G08020	-0.63562	-1.03137	-0.824186	-1.33702	-1.14724
cluster3	AT5G11160	-1.14189	-0.852354	-0.885037	-0.913347	-1.12057
cluster3	AT5G12260	-0.553854	-0.724656	-0.647137	-1.38957	-1.54816
cluster3	AT5G12440	-0.810542	-1.07403	-1.00986	-1.19412	-1.34601
cluster3	AT5G12900	-0.833567	-0.943276	-1.26818	-1.28622	-0.99316
cluster3	AT5G13920	-0.676802	-0.99994	-0.567256	-1.20595	-1.05709
cluster3	AT5G14090	-0.201243	-0.671767	-1.27277	-1.86545	-1.2803
cluster3	AT5G15860	-1.06517	-0.808558	-0.695803	-0.865567	-1.44515
cluster3	AT5G16180	-0.477216	-1.27833	-1.09495	-1.16439	-1.10644
cluster3	AT5G18140	-0.919476	-0.876656	-0.841032	-0.907816	-1.04546
cluster3	AT5G19090	-0.923368	-0.961078	-0.748741	-1.25367	-0.857233
cluster3	AT5G22290	-0.809635	-1.27824	-1.06546	-0.956907	-1.37499
cluster3	AT5G26910	-0.597954	-0.761555	-1.27697	-1.14882	-1.5007
cluster3	AT5G27270	-0.762077	-1.14174	-1.17208	-0.78423	-1.03937
cluster3	AT5G42100	-0.713615	-1.09735	-0.58357	-1.28121	-0.920436
cluster3	AT5G42310	-0.694809	-0.754612	-0.97726	-1.47516	-0.986719
cluster3	AT5G45610	-0.71282	-1.24302	-1.13593	-1.39697	-0.937987
cluster3	AT5G50740	-0.668559	-1.12981	-0.759768	-1.29481	-1.17055
cluster3	AT5G54510	-0.366151	-1.56555	-0.873915	-1.26026	-1.59569
cluster3	AT5G56380	-0.91171	-0.75509	NaN	NaN	-1.15512
cluster3	AT5G58480	-0.740992	-0.807802	-0.756918	-1.12029	-1.40241
cluster3	AT5G58550	-0.378179	-0.946674	-0.964512	-1.42806	-2.00932
cluster3	AT5G58960	-0.818775	-1.09096	-1.14988	-1.24127	-0.892516
cluster3	AT5G60970	-0.677234	-1.19541	-0.588976	-1.36083	-0.956892
cluster3	AT5G61270	-0.805113	-1.07628	-1.14796	-1.08811	-1.32754
cluster3	AT5G62230	-0.735896	-0.674062	-1.51282	-0.949755	-1.46656
cluster3	AT5G64570	-0.42254	-1.28116	-1.0767	-1.26422	-1.24946
cluster3	AT5G64840	-0.604397	-1.0272	-1.31811	-1.26046	-1.09069
cluster3	AT5G66350	-0.977918	-1.07587	-0.612877	-1.3185	-1.09491
cluster3	AT1G01240	-0.854053	-0.638732	-0.642405	-1.33293	-1.1484
cluster3	AT1G01700	NaN	-1.79778	NaN	-0.540739	NaN
cluster3	AT1G05560	-1.16092	-0.828636	-0.988511	-1.10302	-0.921757
cluster3	AT1G09010	-0.767177	-0.823385	-0.911641	-1.17417	-1.14504
cluster3	AT1G10850	-0.531862	-1.19235	-1.27208	-1.32319	-1.16453
cluster3	AT1G13090	-0.834748	-0.845697	-0.99548	-1.07783	-1.46251
cluster3	AT1G14380	-0.540351	-1.10936	-1.05332	-1.36305	-0.932617
cluster3	AT1G15215	-1.04267	-0.937084	-0.967728	-0.983962	-1.14318
cluster3	AT1G21060	-0.837058	-0.497758	-0.890467	-1.07232	-1.70764
cluster3	AT1G23340	-1.01597	-0.989348	-0.72729	-1.2199	-0.955583
cluster3	AT1G24070	-0.891215	-0.506866	-1.25418	-1.26234	-0.965199
cluster3	AT1G26190	-0.759005	-1.13381	-1.38578	-1.22137	-0.967054
cluster3	AT1G28440	-0.701604	-0.974423	-1.20469	-1.25608	-1.32131
cluster3	AT1G29170	-0.461585	-1.11189	-1.926	-1.27388	-1.18405
cluster3	AT1G30610	-0.478946	-1.14271	-1.08849	-1.63617	-0.851386
cluster3	AT1G31650	-0.57923	-1.09238	-1.70135	-1.02917	-1.44667
cluster3	AT1G44110	-0.980106	-0.988394	-0.57987	-1.08983	-1.18533
cluster3	AT1G49520	-0.617057	-0.806621	-0.870865	-1.5513	-1.12395
cluster3	AT1G51965	-0.530384	-0.894877	-1.05937	-1.96592	-1.07327
cluster3	AT1G56430	-0.773539	-0.905404	-0.786331	-1.64312	-1.0756
cluster3	AT1G62870	-0.474222	-1.13515	-0.964344	-1.0512	-2.03526
cluster3	AT1G63670	-0.631944	-1.03389	-1.3439	-1.34817	-1.34875
cluster3	AT1G63680	-0.732086	-0.962434	-1.2967	-1.25288	-1.32092
cluster3	AT1G63850	-0.858938	-0.787036	-0.750441	-1.35792	-1.02902
cluster3	AT1G66180	-0.855596	-1.13306	-0.336978	-1.38887	-1.17533
cluster3	AT1G67830	-1.10295	-0.906878	-0.903359	-1.1277	-1.04937
cluster3	AT1G68890	-0.452023	-0.837411	-1.87067	-1.2546	-1.47163
cluster3	AT1G72810	-0.883513	-1.13267	-0.333578	-1.36012	-1.06507
cluster3	AT1G73360	-0.771045	-0.804983	-0.895247	-1.25743	-1.59468
cluster3	AT1G74090	-1.16606	-0.835539	-0.957946	-1.31367	-1.0347
cluster3	AT1G74390	-1.06783	-0.93227	-1.12109	-0.837027	-1.18372
cluster3	AT1G75380	-0.828085	-1.11232	-1.02179	-1.24469	-1.37071
cluster3	AT1G78180	-0.87367	-0.734587	-1.1116	-1.19465	-1.52994
cluster3	AT2G01630	-0.67792	-1.08364	-0.866584	-1.60923	-0.768921
cluster3	AT2G20240	-0.696486	-0.926865	-1.14138	-1.17282	-1.29765
cluster3	AT2G22650	-1.25238	-0.614245	-1.01753	-1.13589	-1.21629
cluster3	AT2G24960	-1.12983	-0.868101	-1.14591	-1.17367	-1.02121
cluster3	AT2G26730	-0.866053	-1.06838	-0.85183	-1.44871	-1.31425
cluster3	AT2G31190	-1.11887	-0.641196	-1.08339	-0.960866	-1.17686
cluster3	AT2G34170	-0.710127	-1.05792	-1.23889	-0.952708	-1.44934
cluster3	AT2G35060	-0.675795	-1.09549	-1.44205	-1.07834	-1.15214
cluster3	AT2G35130	-1.06883	-0.782264	-1.33078	-0.665188	-1.87153
cluster3	AT2G35155	-0.280265	-0.867887	-1.44807	-2.11569	-0.92952
cluster3	AT2G37630	-0.952751	-1.12731	-1.06547	-1.26924	-1.19532
cluster3	AT2G42690	-0.938065	-0.941274	-0.852455	-1.14119	-1.50778
cluster3	AT2G43110	-0.746757	-0.866141	-0.845177	-1.55551	-1.37796
cluster3	AT2G45590	-1.03623	-0.9741	-0.889866	-1.1257	-1.38831
cluster3	AT2G46710	-0.863423	-0.992244	-1.18257	-0.817544	-1.4974
cluster3	AT3G02060	-0.778525	-1.04923	-1.37324	-1.39114	-1.19843
cluster3	AT3G06145	-0.748352	-0.607574	-1.32027	-1.53112	-1.21997
cluster3	AT3G07730	-0.640928	-0.636347	-1.0062	-1.44403	-1.74782
cluster3	AT3G09050	-0.904235	-0.759692	-1.12154	-1.13606	-1.26119
cluster3	AT3G13190	-1.15238	-0.57089	-1.37918	-1.00301	-1.00649
cluster3	AT3G14240	-0.855306	-1.17807	-0.636963	-1.37259	-1.0899
cluster3	AT3G16890	-0.635195	-1.14914	-1.46926	-1.27602	-1.11096
cluster3	AT3G17640	-0.720658	-0.861301	-0.471257	-1.94742	-1.19362
cluster3	AT3G22740	-1.01666	-1.31759	-0.241141	-1.11014	-1.49951
cluster3	AT3G26932	-0.638337	-0.93719	-1.35896	-1.1701	-1.58867
cluster3	AT3G46610	-0.916924	-0.854776	-0.636703	-1.17627	-1.58145
cluster3	AT3G48240	-0.927792	-0.330568	-0.618629	-1.53466	-1.72777
cluster3	AT3G55340	-0.747111	-1.15223	-0.849819	-1.71465	-1.0169
cluster3	AT3G59670	-1.06866	-0.822375	-0.937236	-1.17763	-1.29817
cluster3	AT3G59940	-0.968206	-0.881846	-0.61845	-1.53366	-1.48505
cluster3	AT3G61840	-0.802846	-2.38875	NaN	-0.29992	-1.1723
cluster3	AT4G00690	-0.564727	-0.791627	-0.694846	-1.59375	-1.71617
cluster3	AT4G01140	-0.891093	-1.26041	0.129541	-1.3405	-1.63253
cluster3	AT4G02010	-0.75427	-1.07986	-0.780838	-1.40551	-1.31466
cluster3	AT4G02630	-1.3511	-0.95313	-1.73951	-0.869911	-0.861552
cluster3	AT4G02900	-0.806926	-1.07945	-1.69919	-0.918359	-1.41023
cluster3	AT4G04900	-1.23971	-1.32123	-1.08428	-0.986551	-0.781971
cluster3	AT4G09970	-1.12284	-0.369069	-1.05252	-1.20613	-1.74466
cluster3	AT4G10090	-1.13281	-0.888097	-0.774423	-1.06102	-1.42426
cluster3	AT4G17180	-1.00823	-1.03359	-0.708245	-1.08694	-1.5461
cluster3	AT4G18760	-0.885045	-0.947533	-0.875995	-1.80698	-0.871476
cluster3	AT4G23020	-1.21182	-1.34371	-0.736955	-0.862461	-1.46767
cluster3	AT4G23890	-1.17035	-0.872362	-0.954156	-1.18586	-1.44819
cluster3	AT4G26850	-1.12212	-0.909005	-0.997	-1.16091	-1.05098
cluster3	AT4G28010	-0.85795	-0.808218	-1.04576	-1.35871	-1.51756
cluster3	AT4G30825	-0.609373	-0.999046	-1.0578	-1.428	-1.65466
cluster3	AT4G34250	-0.542477	-1.54993	-0.644621	-1.54124	-1.44973
cluster3	AT4G34980	-0.958666	-1.21723	-0.744102	-1.65002	-0.92658
cluster3	AT4G35420	-1.32733	-0.483788	-0.974538	-1.14404	-1.29591
cluster3	AT4G39620	-0.490688	-0.868549	-1.32699	-1.61421	-1.38125
cluster3	AT5G03760	-0.934848	-1.06865	-0.952471	-1.23881	-1.15817
cluster3	AT5G03960	-0.575157	-1.72261	-0.349102	-1.36474	-1.43586
cluster3	AT5G08070	-1.3869	-0.928611	-0.823407	-0.554428	-1.73487
cluster3	AT5G13140	-1.21213	-0.932208	-0.844845	-1.20885	-1.10072
cluster3	AT5G18590	-0.493691	-1.2415	-1.67502	-1.55003	-1.13439
cluster3	AT5G25460	-0.987492	-1.01018	-0.783908	-1.2857	-1.24436
cluster3	AT5G35750	-0.683618	-1.11728	-1.16209	-1.34083	-1.45606
cluster3	AT5G35790	-0.723767	-0.907426	-1.5074	-1.04979	-1.63072
cluster3	AT5G38860	-1.08834	-0.596128	-1.32524	-1.59975	-0.728061
cluster3	AT5G41140	-0.366021	-1.27924	-1.60827	-1.91725	-0.727414
cluster3	AT5G44670	-1.13757	-0.989932	-0.867474	-1.01879	-1.30727
cluster3	AT5G52010	-1.05326	-0.965636	-1.08786	-1.28614	-1.39438
cluster3	AT5G52100	-0.760006	-1.10782	-1.41404	-1.01347	-1.89122
cluster3	AT5G53210	-0.580855	-1.31169	-1.17693	-1.61779	-1.29223
cluster3	AT5G53220	-0.533141	-1.38519	-1.64025	-1.23235	-1.37272
cluster3	AT5G55470	-0.745337	-0.658475	-1.45793	-1.03739	-2.36983
cluster3	AT5G56040	-1.04741	-0.729339	-1.01401	-1.58164	-1.29095
cluster3	AT5G57930	-0.857582	-0.889617	-0.851452	-1.59308	-1.46011
cluster3	AT5G61000	-0.936877	-1.12616	-1.04604	-1.41362	-0.96188
cluster3	AT1G03310	-0.897687	-1.09431	-1.59785	-1.17219	-1.26349
cluster3	AT1G05200	-0.83432	-1.16975	-1.54673	-1.05605	-1.6165
cluster3	AT1G05460	-0.388318	-1.09861	-1.74757	-1.3835	-1.60313
cluster3	AT1G10820	-0.810653	-0.817211	-1.20508	-1.4507	-1.4092
cluster3	AT1G14205	-1.24382	-0.617493	-1.17599	-1.16982	-1.17133
cluster3	AT1G16680	-0.352785	-1.33662	-1.64363	-1.38547	-1.46302
cluster3	AT1G18090	-0.51296	-1.32595	-1.11642	-1.39182	-1.52032
cluster3	AT1G19835	-0.512645	-1.5353	-1.31884	-1.59418	-1.0979
cluster3	AT1G22570	-1.09215	-1.10859	-0.377847	-1.25323	-1.66447
cluster3	AT1G58520	-1.14227	-0.794011	-1.00588	-0.915838	-1.77258
cluster3	AT1G60010	-1.13955	-1.03428	-0.758212	-1.23348	-1.29688
cluster3	AT1G60160	-1.04144	-0.930048	-1.04046	-1.29657	-1.41167
cluster3	AT1G67590	-1.30099	-0.780854	-1.08994	-1.11228	-1.60011
cluster3	AT1G72720	-1.12273	-1.37195	-1.5206	-0.33676	-1.68226
cluster3	AT1G72820	-1.02898	-0.924672	-0.687171	-1.34938	-1.48142
cluster3	AT1G73710	-0.257404	-1.3169	-1.54582	-1.55669	-1.46334
cluster3	AT1G75100	-1.08657	-1.26368	-1.29021	-1.04397	-1.10603
cluster3	AT1G80080	-1.07968	-1.18442	-0.943076	-1.46635	-1.11051
cluster3	AT2G01850	-1.33731	-0.967895	-0.955533	-0.977923	-1.45055
cluster3	AT2G02540	-1.16326	-0.870105	-0.623918	-1.47811	-1.38837
cluster3	AT2G20710	-0.646436	-0.805504	-1.60721	-1.51389	-1.43458
cluster3	AT2G23360	-0.742322	-1.08167	-1.37653	-1.58384	-1.01859
cluster3	AT2G24630	-0.858501	-1.16339	-1.1753	-1.30265	-1.47682
cluster3	AT2G24820	-1.14786	-0.890075	-0.542423	-1.45124	-1.2901
cluster3	AT2G28200	-1.21071	-1.3025	-1.11835	-1.19758	-1.06504
cluster3	AT2G32100	-1.09586	-1.41057	-0.623335	-0.897559	-1.84638
cluster3	AT2G36540	-1.21393	NaN	-1.73143	-0.666249	NaN
cluster3	AT2G38460	-1.1456	-0.788541	-1.19746	-1.32598	-1.43647
cluster3	AT2G41560	-0.976471	-1.30112	-1.14866	-1.50614	-0.799162
cluster3	AT2G45150	-1.17016	-1.0288	-1.00836	-1.41153	-0.971588
cluster3	AT2G47450	-1.23216	-0.945373	-0.783607	-1.33155	-1.28424
cluster3	AT3G06070	-1.07924	-0.769492	-0.858499	-1.6724	-1.06344
cluster3	AT3G06080	-1.09766	-1.07402	-1.06584	-1.19605	-1.61233
cluster3	AT3G06840	-1.10534	-0.827511	-0.911459	-1.3798	-1.44894
cluster3	AT3G07310	-1.05105	-1.04285	-0.952048	-1.19327	-1.63697
cluster3	AT3G13810	-1.24793	-0.736586	-1.0379	-1.52713	-1.17655
cluster3	AT3G15095	-1.23433	-1.19707	-0.744529	-1.20335	-1.15043
cluster3	AT3G15354	-0.364209	-1.28538	-1.75661	-1.49696	-1.39484
cluster3	AT3G17040	-0.827775	-1.05286	-1.39548	-1.2079	-1.84476
cluster3	AT3G44380	-1.32161	-0.750788	-0.830942	-1.29257	-1.279
cluster3	AT3G46490	-0.771609	-2.05584	-0.334994	-1.16926	-1.41865
cluster3	AT3G48200	-0.872714	-1.10166	-1.62885	-1.02013	-1.55099
cluster3	AT3G49650	-0.70772	-1.49175	-0.880327	-1.38682	-1.44051
cluster3	AT3G53920	-0.95319	-0.850584	-1.3816	-1.18503	-1.712
cluster3	AT3G56270	-0.781738	-0.980364	-1.43169	-1.36339	-1.53541
cluster3	AT3G57830	-0.513672	-1.30713	-1.20133	-1.88184	-1.00513
cluster3	AT3G58690	-0.96134	-1.07169	-1.34017	-1.29254	-1.36628
cluster3	AT3G59550	0.101338	-1.35978	-1.43453	-1.7695	-2.07272
cluster3	AT4G17770	-1.04651	-1.00427	-1.05629	-1.57973	-0.921843
cluster3	AT4G18210	-1.06486	-1.07804	-0.429307	-1.3363	-1.25355
cluster3	AT4G19420	-1.26341	-1.17682	-1.34571	-0.889681	-1.46542
cluster3	AT4G22290	-1.22716	-1.22602	-0.785541	-1.23528	-1.01508
cluster3	AT4G26150	-0.337586	-1.34842	-0.820883	-2.31237	-0.943069
cluster3	AT4G28100	-1.17284	-0.959765	-0.665845	-1.36356	-1.16242
cluster3	AT4G29720	-0.898404	-1.36827	-1.00811	-1.66212	-0.930535
cluster3	AT4G31590	-0.810187	-1.12043	-1.4136	-1.3717	-1.53574
cluster3	AT4G36050	-0.49696	-1.19994	-1.34712	-1.85422	-1.1702
cluster3	AT4G36240	-1.06093	-1.11897	-0.948537	-1.78356	-0.46105
cluster3	AT4G39770	-0.750173	-1.31356	-1.0766	-1.29137	-1.66986
cluster3	AT5G06940	-0.127689	-1.13437	-0.747182	-2.40348	-1.55559
cluster3	AT5G14770	-0.364927	-1.11116	-1.79402	-1.718	-1.49511
cluster3	AT5G14940	-0.417639	-1.34843	-0.791386	-1.54793	-1.9467
cluster3	AT5G19060	-1.35904	-0.891041	-1.55604	-1.10257	-1.29086
cluster3	AT5G19730	-1.15216	-1.17419	-0.718277	-1.48064	-1.27621
cluster3	AT5G23010	-1.02883	-0.824851	-1.52997	-1.39222	-1.21037
cluster3	AT5G27240	-0.772145	-1.53487	-1.36276	-1.35726	-1.07429
cluster3	AT5G45830	NaN	NaN	-0.909829	-1.52982	NaN
cluster3	AT5G47800	-0.913849	-1.03638	-2.14369	-1.51069	-0.545681
cluster3	AT5G47820	-0.612987	-1.32409	-1.43864	-1.51215	-1.26849
cluster3	AT5G52280	-0.603717	-1.02519	-1.47512	-1.74338	-1.54553
cluster3	AT5G57790	-1.32339	-0.513425	-1.94779	-1.25958	-1.19281
cluster3	AT5G63530	-1.21546	-1.24704	-1.32287	-1.01855	-1.31558
cluster3	AT5G67200	-0.733894	-1.29479	-1.43605	-1.33924	-1.36492
cluster3	AT5G67480	-0.942241	-0.917868	-1.49151	-1.08433	-1.8532
cluster3	AT1G11440	-1.39275	-0.849379	-0.86582	-1.22161	-1.59505
cluster3	AT1G13250	-1.07726	-0.717824	-0.712653	-2.04346	-1.02915
cluster3	AT1G14600	-1.26654	-1.16339	-0.816391	-1.03791	-1.52745
cluster3	AT1G16390	-1.50397	-0.734673	-1.18385	-1.10853	-1.27979
cluster3	AT1G22550	-1.06173	-1.16079	-1.01092	-1.30477	-1.58697
cluster3	AT1G23030	-1.05976	-1.19034	-1.04354	-1.32889	-1.63596
cluster3	AT1G25230	-1.10794	-1.44947	-0.393706	-1.26097	-1.19394
cluster3	AT1G32740	-1.404	-1.13369	-1.06539	-0.805525	-1.07276
cluster3	AT1G62830	-0.908388	-1.11788	-1.13484	-1.71066	-0.999382
cluster3	AT1G66130	-1.19789	-1.12365	-1.60858	-1.11928	-1.22982
cluster3	AT1G69690	-1.22983	-1.19605	-0.866945	-1.43679	-0.893594
cluster3	AT1G70100	-0.835173	-1.35638	-2.0359	-1.2063	-1.08485
cluster3	AT1G76880	-1.2058	-1.04277	-1.01263	-1.65837	-1.09264
cluster3	AT2G17650	-1.14183	-1.23648	-0.773665	-0.913502	NaN
cluster3	AT2G21860	-1.27718	-0.689735	-0.724216	-1.65664	-1.25589
cluster3	AT2G27060	-0.557826	-1.13098	-1.23043	-1.51899	-2.00839
cluster3	AT2G28105	-1.32107	-0.721701	-1.03083	-1.34566	-1.45256
cluster3	AT2G28550	-1.23795	-0.689751	-0.967826	-1.30686	-1.00871
cluster3	AT2G30100	-1.18667	-1.1988	-1.18512	-1.00102	-1.65043
cluster3	AT2G30890	-1.24004	-0.592398	-0.935005	-1.75059	-0.885017
cluster3	AT2G31380	-1.31659	-1.08918	-1.00496	-1.26742	-1.26858
cluster3	AT2G31790	-1.05767	-1.04578	-1.22948	-1.61027	-1.27849
cluster3	AT2G33050	-0.165787	-1.32103	-1.30571	-2.1673	-1.43255
cluster3	AT2G33735	-1.59256	-0.95704	-1.24834	-1.10238	-1.0053
cluster3	AT2G34925	-1.3078	-1.03	-0.842718	-1.52813	-0.901649
cluster3	AT2G38170	-1.54647	-1.16177	-1.04106	-1.19228	-1.16184
cluster3	AT2G43200	-1.10839	-1.51738	-1.14721	-1.16689	-1.26797
cluster3	AT3G12690	-1.00183	-0.796584	-0.878153	-1.57376	-0.615318
cluster3	AT3G18490	-1.28636	-1.16922	-0.720098	-1.47093	-1.2651
cluster3	AT3G25500	-0.984435	-1.11098	-1.31637	-1.91409	-0.870065
cluster3	AT3G56370	-0.657832	-1.26708	-1.25438	-1.64963	-1.53787
cluster3	AT3G59060	-1.17362	-0.614519	-0.8299	-1.38311	-1.03598
cluster3	AT3G59110	-0.880056	-1.17388	-1.50408	-1.20786	-1.69269
cluster3	AT3G60290	-1.45291	-1.01278	-1.29066	-1.05489	-1.53067
cluster3	AT3G62390	-1.11836	-1.17025	-1.10891	-1.28287	-1.59042
cluster3	AT4G03210	-1.30152	-1.10266	-0.914434	-1.14426	-1.0184
cluster3	AT4G12750	-0.46532	-1.54314	-1.51185	-1.75202	-1.29449
cluster3	AT4G14510	-0.751993	-1.26747	-1.50909	-1.65075	-1.31789
cluster3	AT4G14890	-1.14433	-1.04282	-0.556855	-1.26343	-1.12602
cluster3	AT4G18501	NaN	-0.772404	-0.642957	-2.18366	-1.14238
cluster3	AT4G25600	-1.23956	-0.840957	-0.761815	-1.02993	-1.20364
cluster3	AT4G26490	-0.832745	-2.71306	-0.454645	-1.4388	-0.775106
cluster3	AT4G34610	-1.18546	-1.09402	-1.36808	-1.29389	-1.20453
cluster3	AT4G36870	-0.927005	-0.985252	-1.5936	-1.69595	-1.1763
cluster3	AT5G01015	-1.5211	-0.943132	-1.03728	-0.969726	-1.27317
cluster3	AT5G03140	-1.2488	-1.05374	-0.775574	-1.43035	-1.65421
cluster3	AT5G03180	-0.841801	-1.09456	-1.50108	-1.32279	-1.73456
cluster3	AT5G03230	-1.3715	-1.23682	-0.6261	-1.26652	-1.35973
cluster3	AT5G03555	-1.15433	-0.973263	-0.911164	-1.55927	-1.45642
cluster3	AT5G04220	-0.963091	-1.0634	-1.45717	-1.24245	-1.7712
cluster3	AT5G05810	-1.10235	-1.33428	-0.370818	-1.75254	-1.04037
cluster3	AT5G06670	-1.14931	-1.49998	-1.53456	-1.38365	-0.883726
cluster3	AT5G08460	NaN	-1.15405	NaN	NaN	NaN
cluster3	AT5G10570	-1.42979	-1.73003	-1.8107	-0.620281	-1.04096
cluster3	AT5G11420	-1.18657	-1.01955	-0.768389	-1.17202	-1.04619
cluster3	AT5G24330	-1.38606	-0.825253	-1.29796	-1.53685	-1.06384
cluster3	AT5G39210	-1.35198	-1.31233	-1.02941	-0.671391	-0.91543
cluster3	AT5G41400	-1.30864	-1.34575	-0.827279	-1.41269	-1.16483
cluster3	AT5G42130	-1.04998	-0.837664	-0.724975	-1.35193	-0.890853
cluster3	AT5G42760	-1.63051	-0.993781	-1.33432	-1.13903	-0.983745
cluster3	AT5G43820	-1.10061	-1.21811	-1.50624	-1.07129	-1.70867
cluster3	AT5G44250	-1.10608	-0.639311	-0.639994	-1.11737	-1.24284
cluster3	AT5G48910	-0.790773	-1.26164	-1.33703	-1.65427	-1.3965
cluster3	AT5G49360	-1.14296	-1.71651	-0.908541	-1.05315	-1.59028
cluster3	AT5G54130	-1.05912	-0.811099	-0.892161	-1.24837	-0.771943
cluster3	AT5G55840	-0.68117	-0.913206	-1.41109	-1.30526	-2.25223
cluster3	AT5G60850	-1.50537	-1.01767	-0.872112	-1.37637	-1.11019
cluster3	AT5G64330	-0.797327	-1.23975	-1.5082	-1.57714	-1.40558
cluster3	AT5G65710	-0.940909	-1.19997	-1.60941	-1.49019	-1.19599
cluster3	AT5G67060	-1.25985	-0.963553	-0.484983	-1.62535	-1.61314
cluster3	AT1G01860	-1.23221	-0.916622	-1.21003	-1.3927	-1.45275
cluster3	AT1G06360	-1.12387	-1.36241	-0.933269	-1.40313	-1.35046
cluster3	AT1G07280	-1.50257	-1.11042	-1.38238	-0.890898	-1.60242
cluster3	AT1G14840	-0.765986	-1.12715	-1.54849	-1.66888	-1.35917
cluster3	AT1G15290	-0.887983	-1.34351	-1.55695	-1.5022	-1.19924
cluster3	AT1G15510	-0.364397	-1.5403	-1.77977	-1.77243	-1.3837
cluster3	AT1G18620	-0.472485	-1.21997	-1.55508	-1.76584	-1.70217
cluster3	AT1G19340	-1.52428	-0.979455	-1.4838	-0.983978	-1.52155
cluster3	AT1G19350	-1.18776	-0.833074	-0.88876	-1.1185	-0.893072
cluster3	AT1G22330	-1.31963	-0.991808	-0.711942	-1.59773	-1.10047
cluster3	AT1G26500	-0.679452	-1.30619	-0.530018	-1.76887	-1.95449
cluster3	AT1G27460	-0.952151	-1.37774	-1.25871	-1.4424	-1.47845
cluster3	AT1G28310	-0.937922	-0.884723	-0.394364	-1.39137	-1.07998
cluster3	AT1G29660	-1.46291	-0.991919	-1.15424	-1.34774	-1.24782
cluster3	AT1G42550	-0.885331	-1.52255	-1.38455	-1.39099	-1.42734
cluster3	AT1G48480	-1.45567	-0.944965	-0.861619	-1.32601	-1.15362
cluster3	AT1G51080	-1.28097	-1.38003	-1.08073	-1.12109	-1.63828
cluster3	AT1G51440	-0.967724	-1.96154	0.21317	-1.08058	-1.40707
cluster3	AT1G52190	-1.2934	-1.35047	-0.639556	-1.61056	-1.2048
cluster3	AT1G60460	-0.930768	-1.05986	-0.781912	-2.26384	-1.09766
cluster3	AT1G62960	-1.31701	-0.782869	-0.951269	-1.38396	-0.920453
cluster3	AT1G68130	-0.90835	-1.18964	-1.04869	-1.85824	-1.37051
cluster3	AT1G70090	-1.18955	-1.13552	-0.955153	-1.34937	-1.6362
cluster3	AT1G74890	-1.36524	-1.6438	-0.686756	-0.946744	-1.80105
cluster3	AT1G76890	-0.846096	-1.07921	-0.888778	-2.0903	-1.43741
cluster3	AT2G01420	-1.11799	-1.28949	-0.706326	-1.72266	-1.21436
cluster3	AT2G01918	-1.508	-0.812067	-1.06215	-0.97346	-1.23437
cluster3	AT2G13690	-1.06315	-1.49288	-1.0367	-1.76433	-1.01181
cluster3	AT2G23690	-1.44659	-0.875838	-1.01899	-1.70443	-0.72905
cluster3	AT2G26110	-1.1764	-0.676483	-0.537731	-1.66611	-1.08294
cluster3	AT2G27800	-1.37272	-1.2419	-0.801851	-1.48498	-1.31683
cluster3	AT2G34200	-1.1542	-0.874118	-0.716853	-1.2291	-0.97976
cluster3	AT2G35470	-1.50346	-0.996231	-0.681484	-1.42316	-1.23912
cluster3	AT2G36000	-1.32417	-1.15124	-0.971954	-1.42029	-1.34204
cluster3	AT2G36370	-0.826524	-1.0244	-1.33773	-1.41374	-2.05581
cluster3	AT2G36750	-1.31702	-1.53668	-1.04347	-1.64653	-0.536587
cluster3	AT2G42320	-0.685472	-0.838443	-0.962257	-1.94924	-1.8583
cluster3	AT2G43010	-1.2015	-1.47454	-1.24027	-1.16709	-1.4613
cluster3	AT2G44230	-1.06919	-1.37066	-0.579072	-1.61078	-1.65529
cluster3	AT3G03470	-1.05143	-1.58799	-0.857806	-1.36976	-1.48664
cluster3	AT3G04140	-1.513	-1.0565	-0.946418	-1.51859	-1.21101
cluster3	AT3G04760	-0.891308	-1.20296	-1.25295	-1.61578	-1.59344
cluster3	AT3G06750	-1.47943	-1.26691	-0.744171	-1.40826	-1.28558
cluster3	AT3G07540	-0.81379	-1.7683	-1.34821	-1.64186	-1.17087
cluster3	AT3G08600	-1.23683	-1.17307	-0.46895	-1.52668	-1.1082
cluster3	AT3G10405	-1.3892	-1.02532	-1.11475	-1.41041	-1.30781
cluster3	AT3G21620	-1.47776	-0.760785	-1.14622	-1.05444	NaN
cluster3	AT3G28100	-1.7664	-0.960711	-0.820294	-1.19106	-1.5258
cluster3	AT3G45230	-1.30846	-1.12509	-0.399121	-1.73035	-1.20942
cluster3	AT3G49740	-0.350208	-1.05353	-1.26114	-0.93278	-3.43312
cluster3	AT3G49900	-1.15366	-1.16962	-1.20478	-1.6627	-1.27843
cluster3	AT3G54600	-1.53347	-0.996713	-0.917661	-1.53428	-0.979364
cluster3	AT3G54910	-1.38539	-0.856687	-1.46686	-1.48619	-1.28619
cluster3	AT3G56080	-1.12647	-1.47871	-1.21096	-1.51975	-1.12962
cluster3	AT3G56630	-1.43903	-0.806704	-0.643931	-1.36851	-1.25122
cluster3	AT3G61780	-0.551446	-1.69467	-1.11075	-1.95109	-1.19392
cluster3	AT3G66652	-0.451242	-1.34232	-1.86771	-1.79604	-1.41533
cluster3	AT4G02130	-1.19424	-1.01752	-0.622149	-1.4644	-0.902527
cluster3	AT4G12970	-1.60064	-1.36255	-1.04542	-1.32153	-1.09599
cluster3	AT4G13770	-1.10095	-1.05933	-1.19017	-1.62253	-1.54318
cluster3	AT4G15490	-1.12442	-1.04258	-0.380807	-1.49829	-1.10905
cluster3	AT4G18960	-1.00456	-1.47157	-0.405291	NaN	NaN
cluster3	AT4G19070	-1.62206	-0.946499	-0.797718	-1.27776	-1.26053
cluster3	AT4G22200	-1.02286	-0.73622	-1.43766	-1.52823	-1.94524
cluster3	AT4G23770	-1.55834	-1.20087	-1.0512	-1.065	-1.5113
cluster3	AT4G27240	-1.03412	-1.0311	-0.772447	-1.88838	-1.41882
cluster3	AT4G29240	-1.22618	-1.31348	-0.527525	-1.84651	-1.15041
cluster3	AT4G33000	-1.59698	-1.11004	-1.36489	-1.05045	-1.48657
cluster3	AT4G35320	-1.66691	-0.879827	-1.09755	-1.45424	-1.20339
cluster3	AT5G01075	-1.38291	-1.01676	-0.993972	-0.631238	-1.11597
cluster3	AT5G04530	-1.03794	-1.29619	-1.166	-1.36035	-1.70952
cluster3	AT5G05830	-1.41908	-0.864566	-0.687727	-1.22453	-1.31573
cluster3	AT5G10020	-1.02151	-1.21048	-0.846342	-1.82061	-1.35226
cluster3	AT5G10150	-0.994122	-0.855885	-0.548791	-1.31874	-0.993166
cluster3	AT5G15010	-0.972854	-1.17508	-1.40884	-1.23751	-1.8898
cluster3	AT5G16590	-0.814671	-1.26812	-0.945742	-1.77093	-1.69999
cluster3	AT5G21222	-1.01986	-0.880704	-1.66452	-1.36	-1.72768
cluster3	AT5G24010	-1.00472	-1.53898	-1.17547	-1.35643	-1.62207
cluster3	AT5G33280	-1.26107	-1.35573	-0.968371	-1.37379	-1.64905
cluster3	AT5G52882	-0.61468	-1.17736	-1.46829	-1.74376	-1.75782
cluster3	AT5G53420	-1.65766	-0.673916	-1.44726	-1.42999	-1.08163
cluster3	AT5G58770	-1.5244	-1.00022	-0.924849	-1.2841	-0.998688
cluster3	AT5G58900	-1.76239	-0.753139	-1.13116	-1.56704	-0.842215
cluster3	AT5G59350	-1.5883	-0.768633	-1.06979	-1.2191	-0.989732
cluster3	AT5G60880	-1.37756	-1.07222	-1.24016	-1.33171	-1.50782
cluster3	AT5G61300	-0.876582	-1.76843	-1.59876	-1.24146	-1.54688
cluster3	AT5G62130	-1.13789	-0.579755	-0.802704	-1.39116	-0.91899
cluster3	AT5G62360	-1.9633	-0.445293	-1.16301	-1.09035	-1.38934
cluster3	AT5G62430	-1.33432	-1.17188	-0.429483	-1.04779	-1.38332
cluster3	AT5G67150	-1.56467	-1.29501	-0.954139	-1.47981	-0.993058
cluster3	AT1G04240	-1.49084	-1.14482	-0.562428	-1.797	-1.21271
cluster3	AT1G11700	-1.59497	-1.12207	-1.21763	-1.13081	-0.676112
cluster3	AT1G12845	-1.34534	-1.46335	-0.726531	-1.53234	-1.31102
cluster3	AT1G13700	-1.11547	-1.18575	-0.899603	-1.58543	-1.66754
cluster3	AT1G14920	-1.12428	-0.82582	-0.417166	-1.57866	-1.11471
cluster3	AT1G16320	-1.60721	-0.665371	-0.784521	-1.28047	-1.36045
cluster3	AT1G18265	-1.31407	-1.32479	-0.580498	-1.39232	-1.64216
cluster3	AT1G26920	-1.26513	-1.0057	-0.949982	-1.85001	-1.39635
cluster3	AT1G34245	-1.28946	-1.02811	-1.14323	-1.71292	-1.21097
cluster3	AT1G45230	-1.35096	-0.957326	-0.711534	-1.19173	-1.08746
cluster3	AT1G64500	-1.56829	-1.1654	-1.02009	-1.24924	-1.46792
cluster3	AT1G64640	-1.37042	-1.38476	-0.556379	-1.78491	-1.25133
cluster3	AT1G67040	-0.548769	-1.76613	-2.12785	-1.1294	-1.72273
cluster3	AT1G72610	-1.28332	-0.679542	-0.723949	-1.1405	-1.19481
cluster3	AT1G76620	-0.981923	-1.02387	-0.966557	-1.9914	-1.44012
cluster3	AT1G76740	NaN	-1.2217	NaN	NaN	NaN
cluster3	AT2G02780	-1.08343	-0.95101	-1.30477	-1.46463	-1.90281
cluster3	AT2G03890	-1.08431	-1.07334	-1.21693	-1.42439	-1.91792
cluster3	AT2G14660	-1.2436	-1.19636	-0.484075	-1.2737	-1.09102
cluster3	AT2G20875	-1.4951	-1.07459	-0.78914	-1.72884	-0.631807
cluster3	AT2G23180	-0.997228	-1.30701	-0.600091	-2.20546	-1.33877
cluster3	AT2G24220	-1.11522	-0.917312	-1.30296	-1.42851	-1.98316
cluster3	AT2G28150	-1.29333	-0.917049	-1.47156	-1.57456	-1.43031
cluster3	AT2G28410	-1.20681	-1.07835	-0.670555	-1.17822	-0.884149
cluster3	AT2G45560	-0.860769	-1.92357	-0.609091	-1.68985	-1.51919
cluster3	AT3G12320	-1.34618	-0.805213	-0.779965	-0.908303	-1.23166
cluster3	AT3G18870	-2.10849	-0.799877	-1.16109	-1.21447	-1.19356
cluster3	AT3G20200	NaN	-1.12765	-2.13609	NaN	-0.568601
cluster3	AT3G20680	-1.70951	-0.76438	-0.816566	-1.57439	-0.985101
cluster3	AT3G21870	-1.82639	-0.71569	-1.1502	-0.778469	-1.22253
cluster3	AT3G27870	-0.370342	-1.44052	-1.65565	-1.39393	-2.2639
cluster3	AT3G49220	-1.04408	-1.40711	-1.01968	-1.76748	-1.33392
cluster3	AT3G50630	-1.67984	-0.966131	-0.913636	-1.2904	-1.06446
cluster3	AT3G59420	-0.364606	-1.27856	-1.8608	-1.41086	-2.38876
cluster3	AT3G60530	-1.4802	-1.07217	-0.366842	-1.65638	-1.11786
cluster3	AT4G12030	-1.49375	-0.613324	-1.2714	-1.69941	-1.53479
cluster3	AT4G17810	-1.45489	-1.07259	-0.769486	-1.18989	-0.933333
cluster3	AT4G18290	-1.18816	-1.45246	-1.67702	-1.45571	-1.20887
cluster3	AT4G19380	-0.983074	-1.58161	-1.24268	-1.60569	-1.50443
cluster3	AT4G32980	-1.33298	-1.11563	-1.66251	-1.30223	-1.40389
cluster3	AT4G33790	-1.56028	-0.89327	-0.989965	-0.820107	-1.16533
cluster3	AT4G36850	-1.3903	-0.865942	-0.523016	-1.03014	-1.45659
cluster3	AT4G36970	-1.38174	-0.914612	-0.830206	-1.21147	-0.911155
cluster3	AT5G02890	-1.60612	-1.1604	-0.834779	-1.57978	-1.28383
cluster3	AT5G09820	-1.19379	-1.04227	-1.20318	-1.53597	-1.76097
cluster3	AT5G09840	-0.710365	-0.977838	-0.953521	-2.00277	-1.96405
cluster3	AT5G23480	-0.774682	-1.32354	-1.63709	-1.76174	NaN
cluster3	AT5G27230	-1.1462	NaN	-1.05177	NaN	-1.67475
cluster3	AT5G44410	-1.13167	-1.85818	-1.10807	-1.82364	-0.768418
cluster3	AT5G45650	-1.7318	-1.61358	-0.412228	-1.46191	-0.920815
cluster3	AT5G50335	-1.96578	-1.43475	-0.911298	-1.39096	-0.867532
cluster3	AT5G57880	-1.51255	-1.49107	-0.533516	-1.82997	-1.00993
cluster3	AT5G64620	-1.26949	-1.39711	-0.776405	-1.64124	-1.47555
cluster3	AT5G67280	-1.52698	-1.26594	-0.959411	-1.71687	-1.16419
cluster3	AT1G01810	-1.71191	-0.624837	-0.767961	-1.30729	-1.3417
cluster3	AT1G05600	-1.3959	-1.04572	-0.962788	-1.35728	-1.92127
cluster3	AT1G10020	-1.14422	-1.10679	-1.0025	-1.79476	-1.67764
cluster3	AT1G19830	-1.51874	-1.33393	NaN	-1.10181	NaN
cluster3	AT1G52770	-1.00355	-0.734059	-1.13273	-2.32129	-1.32022
cluster3	AT1G68560	-0.74345	-1.38228	-1.27911	-1.73264	-1.77246
cluster3	AT1G70280	-0.736526	-1.64399	-1.45094	-1.62347	-1.65479
cluster3	AT1G72030	-1.8604	-1.54007	-1.22479	-1.04144	-1.16926
cluster3	AT1G78230	-0.334695	-1.54661	-1.27229	-2.14136	-1.67186
cluster3	AT1G79110	-1.76786	-0.695381	-0.784346	-2.02065	-1.06316
cluster3	AT2G17300	-1.36536	-0.921099	-0.805938	-1.17046	-0.879412
cluster3	AT2G45340	-1.09356	-1.49943	-1.34921	-1.49259	-1.52282
cluster3	AT3G16570	-2.07984	-1.21231	-1.04218	-1.32133	-1.04066
cluster3	AT3G19680	-1.59484	-0.899394	-0.917678	-1.75049	-1.44083
cluster3	AT3G25790	-1.1891	-0.991904	-0.146318	-1.7314	-1.12788
cluster3	AT3G48940	NaN	-1.74582	-0.566945	NaN	NaN
cluster3	AT3G53380	-1.15306	-1.14797	-1.19751	-1.86439	-1.37645
cluster3	AT3G55240	-1.95636	-1.12252	-1.22236	-1.20241	-1.22915
cluster3	AT4G11780	-1.17699	-0.135192	0.189762	-1.79609	-2.10473
cluster3	AT4G14760	-0.847303	-1.53864	-1.76727	-2.19331	-0.679022
cluster3	AT5G02190	-1.22197	-1.68923	-0.822704	-1.7435	-1.23102
cluster3	AT5G41920	-1.77839	-1.24608	-0.573833	-1.83808	-1.12118
cluster3	AT5G55580	-1.06147	-1.12212	-1.21759	-1.75266	-1.78173
cluster3	AT1G08180	-2.2212	-1.0277	-0.931352	-1.48335	-0.932408
cluster3	AT1G12100	-2.12958	-1.22678	-0.701339	-1.40486	-0.945026
cluster3	AT1G68120	-1.54181	-0.430584	-0.797679	-1.42515	-1.09359
cluster3	AT1G74850	-0.931222	-1.05262	-1.49521	-2.0215	-1.46179
cluster3	AT2G23840	-1.75312	-0.962788	-1.20975	-1.13335	-1.90275
cluster3	AT2G42395	-1.60319	-1.01924	-0.728935	-1.43299	-1.94578
cluster3	AT3G19300	-1.17038	-0.938536	-1.19834	-2.13806	-1.31103
cluster3	AT4G16141	-1.45542	-1.15507	-1.10823	-1.858	-1.24984
cluster3	AT4G34510	NaN	-2.12289	-0.173518	NaN	NaN
cluster3	AT5G11590	-2.49195	-1.4903	-1.55955	-0.932886	-0.572926
cluster3	AT5G16000	-1.31387	-1.12047	-1.32748	-1.78148	-1.36314
cluster3	AT5G25630	-0.704775	-1.23098	-1.54208	-1.80771	-1.83077
cluster3	AT1G09530	-1.10869	-1.21364	-1.51622	-1.96378	-1.16924
cluster3	AT1G75770	-1.65048	-1.40731	-1.37022	-1.46169	-1.12609
cluster3	AT2G18800	-1.66805	-1.44817	0.0720551	-1.954	-1.0414
cluster3	AT2G35260	-1.40995	-1.04079	-1.20115	-1.71653	-1.5209
cluster3	AT2G37460	-1.35342	-1.24622	-1.48344	-1.68981	-1.24818
cluster3	AT3G03190	-1.82986	-0.757342	-0.821013	-1.48324	-1.88355
cluster3	AT3G20395	-1.7337	-1.77995	-0.806939	-1.34398	-1.29369
cluster3	AT3G27540	-1.72831	-1.21321	-0.757188	-1.71087	-1.39146
cluster3	AT4G04630	-1.09318	-1.39844	-1.16907	-1.58834	-1.80849
cluster3	AT4G32280	-1.46548	-1.61952	0.637162	-2.24962	-1.26261
cluster3	AT4G34020	-1.0179	-1.32796	-1.15348	-1.77074	-1.72698
cluster3	AT5G11550	-1.27425	-1.43569	-0.976852	-1.91261	-1.30949
cluster3	AT5G15410	-1.17678	-1.22205	-1.12102	-2.02325	-1.36935
cluster3	AT5G49170	-1.7455	-1.44054	-0.728531	-1.84667	-1.02075
cluster3	AT5G57785	-1.78245	-1.67099	-0.856603	-1.62328	-0.937453
cluster3	AT5G63630	-1.07188	-1.13556	-1.38649	-1.83854	-1.60321
cluster3	AT1G01840	-1.91668	-1.01924	-0.66645	-1.95514	-1.07508
cluster3	AT1G49470	-1.18076	-1.11251	-0.28646	-1.22964	-1.16724
cluster3	AT1G49660	-1.45135	-1.42905	-1.18982	-1.68008	-1.27094
cluster3	AT1G56720	-0.684626	-1.44189	-1.18	-1.60239	-2.24196
cluster3	AT2G29320	-1.70031	-1.1129	-1.17816	-1.3077	-1.71939
cluster3	AT2G40670	-1.52875	-1.39866	-1.36868	-1.92773	-0.765339
cluster3	AT2G41550	-0.968866	-1.46879	-1.84106	-1.79052	-1.19118
cluster3	AT3G16560	-1.7572	-1.1929	-1.27655	-1.62719	-1.15074
cluster3	AT3G22104	-1.5374	-0.806694	-1.48464	-1.92808	-1.23633
cluster3	AT3G25670	-1.50599	-1.31799	-1.13211	-1.20331	-1.99841
cluster3	AT3G49670	-1.24604	-1.34503	-0.776153	-1.95742	-1.56285
cluster3	AT3G52070	-1.89059	-1.21107	-0.267074	-1.55059	-1.8598
cluster3	AT3G57920	-0.886665	-1.33645	-0.622785	-2.73019	-1.14578
cluster3	AT4G03400	-1.13599	-1.29323	-1.55846	-1.41969	-1.861
cluster3	AT4G14380	-2.64817	-0.531342	-1.06716	-1.096	-1.51126
cluster3	AT4G29910	-1.45359	-1.08347	-1.16661	-1.51764	-1.83536
cluster3	AT5G02860	-0.334072	-1.00644	-1.59971	-2.27243	-1.89468
cluster3	AT5G48730	-1.20928	-1.19231	-1.31458	-1.8483	-1.54461
cluster3	AT1G24280	-1.51352	-1.31749	-1.33553	-1.77454	-1.14653
cluster3	AT1G30570	-1.11659	-1.54977	-1.23547	-1.72481	-1.50453
cluster3	AT1G71970	-1.44033	-1.17142	-0.651219	-1.83122	-1.81572
cluster3	AT1G78930	-0.991553	-0.834109	-1.15324	-1.63632	-2.43506
cluster3	AT2G35700	-1.90487	-1.64158	-0.997591	-1.10183	NaN
cluster3	AT2G46870	-1.76386	-1.22702	-1.14916	-1.46394	-1.47912
cluster3	AT4G13560	NaN	NaN	NaN	-1.23209	-2.15583
cluster3	AT4G27900	-1.68621	-0.849345	-1.44001	-1.8238	-1.2837
cluster3	AT1G01430	-1.17321	-1.33552	-1.12018	-1.56375	-2.00498
cluster3	AT1G14440	-1.20677	-1.58958	-1.04804	-1.85806	-1.43884
cluster3	AT1G23205	-2.10617	-0.884668	-0.585126	-1.78847	-0.837879
cluster3	AT1G23400	-0.922747	-1.36333	-1.52731	-1.75453	-1.70804
cluster3	AT2G18890	-1.65391	-1.03029	-0.564534	-1.16995	-1.09068
cluster3	AT2G41990	-1.66361	-1.35791	-1.09336	-1.49774	-1.57282
cluster3	AT3G17790	-1.87835	-1.27818	-0.719398	-1.42564	-0.582581
cluster3	AT3G30180	-1.83347	-0.676257	-1.32566	-1.86584	-1.34504
cluster3	AT3G46990	-0.910945	-0.82127	-1.61549	-2.08796	-1.74237
cluster3	AT4G00165	-2.09844	-0.77134	-1.00605	-1.63008	-1.5235
cluster3	AT4G03070	-1.49687	-1.15351	-2.04575	-1.01334	-1.82286
cluster3	AT5G05690	-1.63612	-1.26967	-1.27267	-1.6091	-1.39759
cluster3	AT2G31290	-0.963019	-1.23484	-0.967045	-2.43601	-1.40124
cluster3	AT3G15720	-1.45709	-0.776575	-1.31877	-1.34092	-2.3714
cluster3	AT3G26280	-1.38937	-1.71945	-1.0722	-0.888819	-2.36764
cluster3	AT3G47430	-2.17102	-1.28619	-1.38485	-1.20629	-1.25567
cluster3	AT2G18940	-0.8354	-1.52556	-1.41245	-1.77019	-1.79547
cluster3	AT1G80130	-1.70114	-0.829974	-0.732764	-1.10763	-1.08472
cluster3	AT3G23740	-0.663303	-1.10645	-1.27113	-1.05376	-0.66137
cluster3	AT5G51540	-0.471658	-0.909121	-1.6929	-1.26059	-1.04399
cluster3	AT1G05950	-0.506116	-1.38127	-1.3611	-0.985669	-0.958439
cluster3	AT1G01070	-0.883224	-0.990719	-0.613811	-0.955157	-1.04392
cluster4	AT4G04450	3.50879	0.550267	0.110309	1.10806	NaN
cluster4	AT1G76390	1.96983	0.927952	0.753823	0.976916	1.09512
cluster4	AT4G19970	2.76741	0.769718	-0.432965	1.08905	1.6571
cluster4	AT1G77810	3.58746	0.805509	0.433001	1.30606	0.781522
cluster4	AT2G44500	1.81775	0.896675	0.176221	1.63926	1.14155
cluster4	AT3G01990	2.08685	0.507426	0.606692	1.97272	0.429506
cluster4	AT3G11850	1.9515	0.964307	0.499447	1.40545	1.0513
cluster4	AT3G12200	1.55655	1.20616	-0.0662805	1.50398	1.24268
cluster4	AT3G21295	1.82305	0.658933	0.28443	1.32133	1.30047
cluster4	AT4G12010	1.74594	0.857772	0.36738	1.30787	1.36615
cluster4	AT4G35380	1.53511	1.11843	0.0197391	1.36824	1.72503
cluster4	AT5G27610	1.64994	1.17252	0.0826906	1.23331	1.32683
cluster4	AT5G35200	1.48111	0.928637	0.53178	1.4313	1.2499
cluster4	AT5G45050	1.77884	0.732309	0.717025	1.41552	1.34517
cluster4	AT5G49680	1.88712	0.531836	0.557606	1.19381	1.15611
cluster4	AT5G55100	2.32939	1.09336	0.0445509	1.90938	0.905957
cluster4	AT5G60410	1.53422	0.933402	0.437536	1.43289	1.42159
cluster4	AT1G08350	1.70418	0.961999	0.78136	1.46201	1.13446
cluster4	AT1G10050	1.62148	1.11607	0.563725	1.42744	1.19855
cluster4	AT1G16220	1.49497	1.09197	0.236031	1.75132	1.22455
cluster4	AT1G23170	1.72914	0.650758	1.13218	1.39016	1.28322
cluster4	AT1G50360	2.09232	1.04344	0.310022	1.77458	1.17659
cluster4	AT1G70740	2.08254	0.592938	0.59165	1.2036	1.34686
cluster4	AT1G77390	1.71445	1.35288	0.745572	1.23178	NaN
cluster4	AT2G18090	1.51314	1.05202	0.672849	1.37535	1.19829
cluster4	AT2G20080	1.62416	0.416527	0.217465	2.08998	1.36504
cluster4	AT3G08870	2.3804	0.383707	1.91216	0.949774	0.85376
cluster4	AT3G44730	2.42007	-0.102352	1.06024	1.02021	2.11255
cluster4	AT3G49210	1.95398	0.909084	0.7972	1.13561	1.5969
cluster4	AT3G51360	1.5575	0.390712	0.847623	1.44897	1.385
cluster4	AT3G60110	1.57131	1.19033	0.688062	1.19604	1.23026
cluster4	AT3G61390	2.62282	1.39168	0.111971	1.4159	NaN
cluster4	AT4G04610	1.81147	1.1651	-0.409466	1.98399	1.83631
cluster4	AT4G19510	2.51316	1.59962	-0.122666	0.280128	2.61904
cluster4	AT4G29900	1.8116	1.19589	0.663164	1.26228	1.20139
cluster4	AT5G02400	1.55648	0.909863	0.724179	1.18096	1.49453
cluster4	AT5G11920	1.90638	0.815055	0.822712	1.51918	1.26481
cluster4	AT5G59220	1.82152	1.08155	0.699697	1.86873	1.01267
cluster4	AT5G59700	1.77622	0.954206	0.37592	1.78717	1.60947
cluster4	AT5G60760	2.53644	1.3282	0.383519	1.50534	1.67903
cluster4	AT1G02390	2.06162	1.16885	0.394018	1.58032	1.81354
cluster4	AT1G18900	2.07958	1.45958	0.322589	1.59746	1.57173
cluster4	AT1G19270	1.94122	1.24942	0.779141	1.56278	1.26593
cluster4	AT1G55970	2.129	1.00172	0.534783	1.81888	1.23317
cluster4	AT1G74710	2.29223	1.07138	1.30972	1.2793	0.981269
cluster4	AT2G18700	2.16454	0.474984	0.632995	1.96199	1.61445
cluster4	AT2G19710	2.39428	1.2753	0.46882	1.38321	1.93617
cluster4	AT2G37980	2.3564	1.21665	0.567364	1.93162	1.39569
cluster4	AT2G40090	1.38597	1.03061	0.671012	1.47179	1.23934
cluster4	AT3G13100	1.70258	0.85078	0.113665	2.03522	2.14026
cluster4	AT3G14840	2.11129	0.974227	0.684267	1.76978	1.49047
cluster4	AT4G11230	2.48651	0.912414	1.20998	1.4062	1.27419
cluster4	AT4G34400	3.23077	0.380434	NaN	NaN	NaN
cluster4	AT5G15890	2.21693	1.07422	0.180183	2.39456	1.4214
cluster4	AT5G17680	2.82054	0.630677	1.53069	0.918183	1.94032
cluster4	AT5G20990	1.50809	1.18536	0.642387	1.40835	1.33875
cluster4	AT5G45110	1.69109	0.863823	0.772809	1.51634	1.68753
cluster4	AT5G54650	2.09086	1.27896	0.766238	1.60425	1.57406
cluster4	AT2G21620	1.51879	1.10546	0.856888	1.32633	1.36537
cluster4	AT2G35390	1.42296	0.919881	0.648051	1.94918	0.989259
cluster4	AT2G41450	1.49949	1.39098	-0.254271	1.71955	2.29634
cluster4	AT2G41690	1.23134	1.26781	0.0314671	1.67544	1.81245
cluster4	AT3G42180	1.34817	1.09254	0.565015	1.42502	1.52897
cluster4	AT3G57520	1.37904	1.45072	0.361628	1.51245	1.36232
cluster4	AT4G23515	NaN	NaN	0.244487	1.71461	1.25776
cluster4	AT4G35500	1.49835	1.02789	0.93958	1.52741	1.12024
cluster4	AT4G39320	2.97039	1.62974	0.43831	2.04131	1.46054
cluster4	AT5G02800	1.38103	0.978232	0.691374	1.79036	1.25016
cluster4	AT5G23520	1.68042	1.23205	0.743699	1.57486	1.31379
cluster4	AT5G38710	1.88248	1.32597	0.748024	1.62731	1.3586
cluster4	AT5G57580	1.39908	1.12458	0.862762	1.41639	1.16428
cluster4	AT1G07650	1.52483	1.09499	0.977052	1.27593	1.30355
cluster4	AT1G53330	1.91335	1.44714	0.590759	1.78419	NaN
cluster4	AT1G61140	1.67551	1.29047	0.730257	1.25622	1.77489
cluster4	AT2G30400	1.84682	1.82222	0.659171	1.08483	1.57948
cluster4	AT2G33490	1.64122	1.04974	0.81384	1.68727	1.33206
cluster4	AT3G03110	1.39374	1.05251	0.71487	1.51543	1.39313
cluster4	AT3G06500	1.69214	0.996416	0.499947	1.71489	2.00036
cluster4	AT3G11040	1.63068	1.25168	0.548061	1.99205	1.37616
cluster4	AT3G12360	1.506	0.945864	1.0397	1.36104	1.35504
cluster4	AT3G15200	1.57849	1.52002	0.607866	2.13468	0.792931
cluster4	AT3G18370	1.78133	0.817023	0.934053	1.72808	1.4445
cluster4	AT3G22800	1.26136	0.983149	0.685597	1.7297	1.26317
cluster4	AT3G26090	1.3117	1.10535	0.776082	1.67417	1.05769
cluster4	AT3G55410	1.16711	1.09201	0.638333	1.6436	1.41187
cluster4	AT4G04695	1.75822	1.41187	0.844065	1.43236	1.27869
cluster4	AT4G26970	1.28824	0.70675	0.38431	2.04435	1.1607
cluster4	AT4G33300	1.90458	1.27949	0.938622	1.15887	1.70947
cluster4	AT4G36430	1.49004	1.52117	0.423516	2.19177	1.03553
cluster4	AT5G35370	1.54128	1.21467	0.69824	1.73564	1.24076
cluster4	AT5G57015	1.43047	1.03704	0.877215	1.76006	1.23519
cluster4	AT5G58160	1.63816	1.39402	0.675015	1.6721	1.42858
cluster4	AT5G60280	1.77997	1.07448	1.40076	1.56327	0.776258
cluster4	AT1G05670	1.88013	1.46386	-0.0954359	2.78385	0.0794041
cluster4	AT1G06840	1.48288	1.15687	0.862631	1.59643	1.14921
cluster4	AT1G59820	2.00145	1.16177	0.957664	1.42478	1.67193
cluster4	AT1G66680	1.46675	0.912474	0.812216	1.9009	1.23726
cluster4	AT2G14255	1.36592	1.01019	0.616924	1.91341	1.48701
cluster4	AT2G17290	1.31869	1.27479	0.963972	1.32416	1.26351
cluster4	AT2G24180	1.76038	1.4362	0.72273	2.08072	1.12368
cluster4	AT2G27150	1.7456	1.13139	1.03224	1.24774	1.6136
cluster4	AT2G39480	1.84852	1.16197	0.852578	1.59045	1.60365
cluster4	AT3G50910	1.42651	1.25998	0.580986	1.74082	1.61138
cluster4	AT4G01090	1.40887	1.04179	0.872171	1.72574	1.30684
cluster4	AT4G17720	1.38631	1.33404	0.727582	1.70282	1.45065
cluster4	AT4G24290	1.46548	1.20476	0.813552	1.77997	1.3581
cluster4	AT4G30060	1.49561	1.18047	0.882481	1.75044	1.3012
cluster4	AT5G41610	1.94306	1.04178	1.18622	1.21924	1.70577
cluster4	AT5G59430	1.91151	1.11547	0.666342	2.17935	1.50567
cluster4	AT2G16720	1.42447	1.28921	1.07523	1.74776	0.939605
cluster4	AT2G37370	1.26373	1.09471	0.501709	2.30268	NaN
cluster4	AT3G10500	1.57369	1.25353	1.03256	1.37928	1.50084
cluster4	AT3G20860	1.71834	0.680898	0.763361	2.53234	1.45789
cluster4	AT3G62260	1.58047	0.775325	1.01988	2.03088	1.37956
cluster4	AT3G63500	1.95741	1.24525	0.942045	1.4633	1.71921
cluster4	AT4G24230	1.60196	1.00208	1.06262	1.78286	1.34309
cluster4	AT4G26400	1.32146	1.21277	1.10679	1.50492	1.16157
cluster4	AT4G33920	1.57971	1.45097	0.683589	1.90128	1.45301
cluster4	AT4G36550	1.83958	1.36616	1.02085	1.66393	1.27559
cluster4	AT4G39910	1.27499	1.37294	0.983882	1.73324	1.13821
cluster4	AT5G14480	1.45951	0.905006	1.08199	1.89729	1.2436
cluster4	AT5G15640	1.79644	1.35187	0.86422	1.65002	1.55119
cluster4	AT5G54780	1.4772	1.01812	0.798981	2.55779	1.13562
cluster4	AT5G61530	1.15326	1.2131	0.68517	1.74987	1.61366
cluster4	AT1G14730	1.57769	1.29853	1.21772	1.8384	0.587508
cluster4	AT1G53390	1.49839	1.06794	1.00535	1.66692	1.46217
cluster4	AT1G63030	NaN	NaN	NaN	1.59365	NaN
cluster4	AT1G67070	1.52589	0.953571	1.23352	1.55153	1.53891
cluster4	AT1G74740	1.54169	0.907141	1.0232	2.03061	1.29686
cluster4	AT2G25410	1.32446	NaN	NaN	1.55099	NaN
cluster4	AT2G27080	1.35697	0.938919	1.14966	1.55904	1.41301
cluster4	AT2G34500	1.50499	1.02871	0.832149	2.30621	1.39741
cluster4	AT2G36650	1.37886	0.739982	0.571744	3.00893	1.34321
cluster4	AT2G46260	1.56501	1.02516	0.965628	2.0407	1.31422
cluster4	AT2G47680	1.28204	1.04583	0.897331	1.95275	1.4145
cluster4	AT3G06300	1.26808	1.06595	1.15026	1.89874	1.26552
cluster4	AT4G17250	2.4532	0.981619	0.954479	2.46124	1.38061
cluster4	AT4G23700	2.11972	1.66795	1.44627	1.98924	0.466637
cluster4	AT4G33060	1.64204	1.07414	1.25376	1.72084	1.265
cluster4	AT5G10520	2.19744	1.64578	1.08324	1.69359	1.2137
cluster4	AT5G13790	1.17634	1.6206	0.753304	1.89298	1.26386
cluster4	AT5G21900	1.65717	1.28942	1.03804	1.54322	1.60245
cluster4	AT5G58720	1.45178	1.17766	0.99155	1.94455	1.35582
cluster4	AT5G60800	1.63001	1.49492	1.14777	1.19342	1.58227
cluster4	AT1G34370	1.40886	1.36167	1.05515	1.54575	1.53205
cluster4	AT1G61660	1.38102	1.46834	1.07416	1.5472	1.35515
cluster4	AT1G67850	1.61741	1.50948	1.15949	1.40223	1.42643
cluster4	AT2G04400	0.992512	1.57863	0.530531	1.94711	1.45221
cluster4	AT2G18670	1.72993	1.03376	1.42878	1.45511	1.44504
cluster4	AT2G46270	1.54739	1.5196	0.775051	1.84383	1.58991
cluster4	AT3G54620	1.73237	1.40599	0.83205	1.86899	1.59754
cluster4	AT3G54850	1.72505	1.34194	0.994436	1.77264	1.46905
cluster4	AT4G25070	2.06287	1.15053	0.900812	1.8809	1.75804
cluster4	AT4G25560	1.27062	1.54676	0.650708	2.03815	1.50712
cluster4	AT5G01980	1.10088	0.994428	0.774833	1.76686	1.40793
cluster4	AT5G22630	1.10912	1.35297	0.781514	1.89226	1.63319
cluster4	AT5G61010	1.76407	1.55253	1.00339	1.19431	1.76628
cluster4	AT1G21450	1.99856	1.04829	1.1196	1.7663	1.74417
cluster4	AT1G34300	1.91722	1.23731	0.968647	1.86357	1.67479
cluster4	AT1G76470	1.42654	1.17786	0.747079	1.56964	2.12145
cluster4	AT2G23450	2.14283	1.17484	1.20435	1.71906	1.59445
cluster4	AT2G25850	1.93311	1.20138	0.828229	1.73504	1.95981
cluster4	AT2G30990	1.76503	1.45903	0.87399	1.63886	1.71143
cluster4	AT3G19553	1.40969	1.52186	1.39285	1.90543	1.0222
cluster4	AT3G55090	NaN	1.82569	1.03798	NaN	0.958119
cluster4	AT3G62590	1.73144	1.13367	1.35303	1.94471	1.34449
cluster4	AT3G66654	1.35554	1.32355	1.04712	1.73432	1.56055
cluster4	AT4G01950	1.70162	1.19309	0.869484	2.27781	1.54766
cluster4	AT4G17486	1.34641	0.770902	1.10976	1.65593	0.919496
cluster4	AT4G18890	2.14929	1.17564	1.10485	1.37713	1.88806
cluster4	AT4G23850	1.56693	1.25147	1.09326	1.71056	1.625
cluster4	AT4G27460	1.90465	1.02691	1.2361	2.05877	1.40311
cluster4	AT5G12300	1.84306	1.21493	1.42953	1.54021	1.50149
cluster4	AT5G61380	1.93857	1.3858	1.0897	1.80312	1.61329
cluster4	AT1G02660	2.07934	1.3428	1.01554	2.252	1.36235
cluster4	AT1G07520	2.28025	1.49168	0.90981	1.63713	1.72615
cluster4	AT1G08450	1.52547	1.19926	1.5089	1.68822	1.35523
cluster4	AT1G10480	1.18748	1.74621	0.681925	1.77697	1.69017
cluster4	AT1G17060	1.28017	1.0895	0.845544	2.03715	0.883674
cluster4	AT1G50440	1.28411	1.40964	0.919343	1.78601	1.71714
cluster4	AT2G01450	2.04727	1.62261	1.16621	1.7683	1.3601
cluster4	AT2G29065	1.66643	1.45151	1.1346	1.5321	1.68877
cluster4	AT2G42980	1.16882	0.954812	NaN	1.93594	NaN
cluster4	AT3G22600	1.33035	1.57404	1.08262	2.15617	1.22782
cluster4	AT3G48890	1.05996	0.936672	0.960321	2.49394	1.6167
cluster4	AT3G52870	1.1038	1.44339	0.560542	2.36419	1.72174
cluster4	AT3G59660	1.65301	2.07501	0.671578	2.03398	1.47537
cluster4	AT5G07440	1.4947	1.45519	0.945368	1.91605	1.72991
cluster4	AT5G15120	1.7158	1.35075	1.44237	1.58388	1.55077
cluster4	AT5G62570	1.76466	1.50936	1.20052	1.72474	1.5739
cluster4	AT1G12360	2.22994	1.3249	1.04083	2.006	1.61313
cluster4	AT1G49050	1.87946	1.37757	1.19633	1.51327	1.75018
cluster4	AT1G79690	1.28299	1.49088	0.566763	2.14686	1.88797
cluster4	AT2G11520	1.61879	1.42435	1.12112	1.60621	1.76531
cluster4	AT2G46990	1.45131	1.66018	0.840179	2.36265	1.43378
cluster4	AT3G54810	1.67812	1.42739	0.899502	1.66028	2.00695
cluster4	AT3G55430	1.57108	1.34817	1.38628	1.64548	1.57787
cluster4	AT4G33880	1.38041	1.36098	0.27574	2.1674	2.30537
cluster4	AT5G56970	1.2003	1.65247	0.524529	2.30207	1.81096
cluster4	AT5G64300	1.55376	1.67506	0.843212	1.79468	1.81698
cluster4	AT1G52890	1.13382	1.67515	-0.0720244	2.22637	2.46029
cluster4	AT2G43320	1.4898	1.46563	1.02833	1.7134	1.88631
cluster4	AT3G02750	1.67131	1.39301	0.92016	2.14075	1.71652
cluster4	AT4G08500	1.56623	1.45307	1.09943	1.72213	1.8339
cluster4	AT4G10720	1.55835	1.94731	0.486997	2.56612	1.49363
cluster4	AT5G02230	1.25635	0.854236	0.556589	2.72199	0.630878
cluster4	AT5G48150	1.65277	1.38176	1.32837	1.66192	1.69305
cluster4	AT1G03940	1.66385	NaN	NaN	NaN	NaN
cluster4	AT1G04500	NaN	0.31997	NaN	2.13267	NaN
cluster4	AT1G13000	1.45303	1.6464	1.09304	1.83236	1.6805
cluster4	AT1G21080	1.31519	1.05627	0.724791	1.81575	0.788868
cluster4	AT1G45145	0.980233	1.04167	1.09557	2.8382	1.53283
cluster4	AT1G61215	1.19596	1.43822	0.858567	1.70222	0.750473
cluster4	AT2G31800	1.89804	1.34006	1.30977	2.04509	1.47307
cluster4	AT4G26170	1.70163	0.937902	-0.949365	2.27083	0.829706
cluster4	AT4G37610	1.18355	0.937554	0.801221	1.94019	0.911469
cluster4	AT1G05880	1.48502	1.91005	1.10284	1.48456	NaN
cluster4	AT1G32350	1.01466	2.26545	0.822961	2.81851	1.02865
cluster4	AT4G11350	1.36134	1.7931	0.891296	1.81438	1.86157
cluster4	AT4G16600	1.94135	0.033878	1.30232	3.00746	NaN
cluster4	AT4G35770	1.76054	1.15444	0.822771	1.77086	-0.0934419
cluster4	AT3G49370	1.78823	1.72362	1.26361	2.03788	1.38117
cluster4	AT4G37400	1.33348	0.999658	0.893708	2.22572	2.1491
cluster4	AT4G35190	2.22107	2.12218	0.815239	1.78315	1.57222
cluster4	AT4G37770	2.73289	1.09737	2.30628	NaN	0.757507
cluster4	AT5G45250	2.07588	1.49434	0.862309	1.82976	1.9418
cluster4	AT5G52800	NaN	1.16219	NaN	NaN	NaN
cluster4	AT3G02360	1.58835	1.18731	1.05552	2.19645	1.88967
cluster4	AT5G02320	2.45474	1.56669	0.925699	1.63685	1.88195
cluster4	AT5G23850	1.28205	1.55085	0.909225	2.21836	1.85083
cluster4	AT5G37740	1.40077	1.39323	1.02608	1.94896	1.97135
cluster4	AT1G61640	1.60207	1.3445	1.00861	1.60372	2.17555
cluster4	AT2G39350	1.91802	1.29299	1.35052	1.74945	1.76775
cluster4	AT3G22370	1.78381	1.17479	0.95832	1.76215	2.21037
cluster4	AT1G51760	1.51548	1.66546	0.599317	2.28287	1.98363
cluster4	AT4G24400	1.78721	1.76925	1.24573	1.85181	1.56331
cluster4	AT5G23000	2.43292	0.75767	1.35672	2.12387	1.8085
cluster4	AT5G47420	1.712	1.42362	1.12769	1.88283	1.87936
cluster4	AT1G34260	2.4678	1.59266	0.988797	0.664542	2.43883
cluster4	AT2G07180	1.85089	1.65495	1.47032	1.68014	1.52257
cluster4	AT3G13650	1.18174	2.1054	0.795808	2.24086	1.65899
cluster4	AT3G49350	1.83187	1.20944	1.30194	2.14934	1.69393
cluster4	AT3G59350	1.86246	1.88415	1.39708	2.08845	1.20894
cluster4	AT5G65200	1.95732	1.38742	1.17086	2.22922	1.65958
cluster4	AT1G13470	2.44215	0.937521	1.85556	1.06803	1.91932
cluster4	AT2G22470	1.94189	1.18853	1.93459	2.43273	1.03742
cluster4	AT3G53260	1.86934	1.77566	1.02714	2.33449	1.51177
cluster4	AT2G03505	2.20076	1.34394	1.70284	1.80462	1.48088
cluster5	AT1G18590	-0.588197	0.428239	0.0220623	1.37783	0.826828
cluster5	AT1G47271	0.233343	0.423094	0.582168	1.23112	0.133921
cluster5	AT2G05530	0.037149	0.485921	-0.176277	1.12819	0.628091
cluster5	AT2G14620	-0.289243	0.35468	-0.0665198	1.62079	0.126898
cluster5	AT2G31570	-0.10318	0.2156	0.358135	1.06578	0.43073
cluster5	AT2G43670	0.305837	0.121093	0.42783	0.971066	1.05991
cluster5	AT3G03870	0.0132495	0.262565	0.742397	1.17528	0.440155
cluster5	AT3G16350	0.360876	0.254361	0.535459	1.11078	0.750623
cluster5	AT3G53200	-0.0483347	-0.519945	0.627686	1.12759	0.517444
cluster5	AT4G15990	-0.0550966	0.271665	0.257919	1.17147	0.967259
cluster5	AT4G35630	-0.193828	0.650552	0.252305	1.05461	0.774053
cluster5	AT5G65207	-0.0801311	-0.451917	1.23296	1.21259	0.142477
cluster5	AT1G12600	-0.0219803	0.166432	0.534691	1.60669	1.15941
cluster5	AT1G19670	-0.379377	1.23106	0.236155	1.51084	1.06709
cluster5	AT1G24100	-0.263559	0.162694	0.151146	1.9072	1.42092
cluster5	AT1G64700	0.342662	0.0628294	0.969889	1.14786	0.819729
cluster5	AT1G65870	0.0190317	0.307423	0.797808	1.45201	1.07135
cluster5	AT1G70990	-0.2666	0.121289	0.582042	1.60842	1.53503
cluster5	AT2G01300	-0.00897709	0.310467	0.238558	1.36269	1.39911
cluster5	AT2G01880	-0.132478	0.978925	0.212284	1.05756	0.488621
cluster5	AT2G20610	-0.0150203	0.455789	0.0256397	1.08859	0.977733
cluster5	AT2G46650	-0.580572	0.572694	0.198449	1.54497	1.23118
cluster5	AT3G03860	0.162878	0.357433	0.614241	1.1107	0.804631
cluster5	AT3G52360	0.343897	0.280634	0.654768	1.35986	0.826954
cluster5	AT4G01710	0.23539	0.571383	0.491222	1.03476	0.870687
cluster5	AT4G04972	0.273391	0.395006	0.526404	1.25771	1.08225
cluster5	AT4G36410	-0.0315274	0.678026	0.46397	1.30737	0.600133
cluster5	AT5G03260	0.475109	0.0900659	0.43712	1.48491	0.746891
cluster5	AT5G07460	0.034585	0.824128	0.494311	1.12293	0.749738
cluster5	AT5G21950	0.105078	0.375792	0.771193	1.33926	0.770975
cluster5	AT5G61600	0.370684	0.131661	0.239852	0.922816	1.37198
cluster5	AT1G19250	NaN	0.225753	0.524776	1.01219	1.35775
cluster5	AT1G63820	0.361816	-0.682515	1.17251	2.14774	1.92427
cluster5	AT2G05260	0.431067	0.47	0.453791	1.00447	0.895919
cluster5	AT3G48180	-0.218538	0.378229	0.712609	1.06059	1.24986
cluster5	AT3G59850	0.0703712	0.758132	0.456622	1.5778	1.38924
cluster5	AT4G31860	0.0883284	0.596337	0.422724	1.00332	1.18207
cluster5	AT4G35200	0.190192	0.442724	0.142832	1.01332	1.35696
cluster5	AT4G36110	-0.209155	-0.114108	1.3129	0.978761	0.969496
cluster5	AT2G39855	0.197983	0.243753	0.456357	0.690818	1.23727
cluster5	AT3G03590	0.119179	0.4738	0.549607	0.834561	1.03076
cluster5	AT3G49820	0.377705	0.459991	0.760527	1.4777	1.18624
cluster5	AT3G50800	0.360057	0.567384	0.412118	1.19114	0.710939
cluster5	AT4G18280	0.0514044	0.426378	1.02336	0.755448	0.291252
cluster5	AT4G26810	-0.049756	0.349752	0.931243	1.07948	1.27724
cluster5	AT5G40370	0.172687	0.722388	0.575598	1.02377	0.870817
cluster5	AT5G46060	0.204262	0.666314	0.722961	1.27162	0.984281
cluster5	AT1G06570	0.422355	0.548723	0.484465	1.11264	0.71778
cluster5	AT1G64405	0.45858	0.369726	0.333135	0.760291	1.07861
cluster5	AT1G75250	-0.0427744	0.859725	0.553051	1.01921	1.10089
cluster5	AT2G40113	0.548656	0.155368	1.08373	1.3217	0.415517
cluster5	AT2G44730	0.199202	0.691508	0.724528	1.06642	0.732709
cluster5	AT4G31750	0.511333	0.371337	0.678701	1.29738	1.01101
cluster5	AT5G16110	0.351036	0.355654	0.890835	1.08306	0.90569
cluster5	AT5G46530	0.05401	0.685767	0.637907	1.01625	1.16032
cluster5	AT1G03210	0.548056	0.517539	0.455852	1.03848	0.790149
cluster5	AT1G08670	0.22394	NaN	0.124032	0.753341	1.01181
cluster5	AT1G08830	0.164892	0.590526	0.610256	0.863091	1.03598
cluster5	AT1G61890	0.334387	0.726384	0.316477	1.07265	0.435501
cluster5	AT1G66760	0.532706	0.439219	0.702666	1.0933	0.823455
cluster5	AT1G76560	0.438782	0.457434	0.903812	1.30994	0.116165
cluster5	AT2G44130	0.31103	0.0264879	1.3881	0.587199	0.305
cluster5	AT3G15450	0.394845	0.40379	1.22647	1.54289	0.525146
cluster5	AT3G29010	0.486056	0.469119	0.907975	1.18	0.56791
cluster5	AT3G52540	0.571049	-0.0386858	1.32575	1.33927	1.06576
cluster5	AT3G57020	0.162277	0.413495	1.00312	0.57274	0.709261
cluster5	AT4G05170	0.252474	0.859884	-0.0690853	1.0381	1.31517
cluster5	AT4G12250	0.445382	0.576956	0.8942	1.02529	0.683934
cluster5	AT4G31875	0.102686	0.936008	1.01992	1.2198	0.626334
cluster5	AT5G09970	0.571221	0.248335	1.24553	0.494287	0.217192
cluster5	AT1G09815	0.234339	0.704493	0.512184	1.02731	1.19125
cluster5	AT1G12710	0.418429	0.765424	0.393337	1.00829	1.00254
cluster5	AT1G20700	0.305545	0.87076	0.394184	1.19278	1.06777
cluster5	AT1G26690	0.321027	0.783315	0.791286	1.11559	0.824288
cluster5	AT1G27290	0.113845	0.398459	1.11211	0.676639	0.756043
cluster5	AT1G52330	0.428088	0.626138	0.673776	1.02949	0.83244
cluster5	AT1G55475	0.46524	0.715037	0.401031	1.05142	0.939094
cluster5	AT1G71190	0.53899	0.531318	0.754684	1.02091	0.766771
cluster5	AT1G72750	0.0776585	0.524552	0.69916	0.740204	1.11542
cluster5	AT1G77370	0.188038	0.725079	0.723527	1.20952	1.11039
cluster5	AT1G77885	0.249442	0.872684	0.535068	1.08437	0.960006
cluster5	AT2G37750	0.413324	0.318547	0.98112	1.09091	0.962548
cluster5	AT2G47490	0.517521	0.687497	0.299722	0.708805	1.01173
cluster5	AT3G03160	0.211643	0.510299	0.716684	0.59249	1.00398
cluster5	AT3G04570	0.242861	0.516699	0.579732	0.590791	1.1271
cluster5	AT3G06420	0.522523	0.510058	0.637907	1.42361	0.81269
cluster5	AT3G11900	0.284821	0.62813	0.42647	0.660708	1.02803
cluster5	AT3G49380	0.332378	0.784016	-0.196234	0.911565	1.17304
cluster5	AT3G55830	0.553861	0.566147	0.852193	1.05033	0.816093
cluster5	AT4G27470	0.50906	0.445354	0.494722	0.77418	1.08564
cluster5	AT4G29810	0.298962	0.948886	0.605521	1.03436	0.862177
cluster5	AT4G33940	-0.0323995	1.37292	0.993719	1.37518	-0.0148041
cluster5	AT4G36610	0.528511	0.629749	0.433103	0.934292	1.05577
cluster5	AT5G05370	0.14494	0.600866	0.690228	0.656317	1.02607
cluster5	AT5G26731	0.251532	0.36711	0.929432	0.609008	1.01984
cluster5	AT5G41070	0.664399	0.304914	1.06821	0.526993	0.493499
cluster5	AT5G52020	0.0951049	1.08318	1.08586	0.618866	0.128537
cluster5	AT5G55110	0.572666	0.626114	0.425247	0.893486	1.11217
cluster5	AT1G29050	0.134205	0.8342	0.644435	1.15782	1.17953
cluster5	AT1G64300	0.61704	0.576119	0.713282	1.13952	0.813221
cluster5	AT1G72690	0.347914	0.598223	0.793787	1.05174	1.12869
cluster5	AT1G79590	0.375684	0.809663	0.710485	1.18097	1.02341
cluster5	AT2G38610	0.374677	0.712921	0.550179	0.926432	1.04631
cluster5	AT3G07090	0.0927074	1.0113	0.330628	0.694368	1.19145
cluster5	AT3G15352	0.214977	0.619432	0.781458	0.720524	1.00655
cluster5	AT3G22240	0.567802	0.578923	0.516473	0.839718	1.14569
cluster5	AT3G27290	0.50036	0.842652	0.640763	1.02782	0.772448
cluster5	AT3G60410	0.343579	0.670408	0.726231	0.83895	1.00768
cluster5	AT5G07475	0.137081	0.63813	0.548543	0.730556	1.35735
cluster5	AT5G52210	0.317919	0.871326	0.81757	1.08885	0.908619
cluster5	AT5G56550	0.623302	0.505845	0.929165	1.29779	0.507967
cluster5	AT1G11905	0.455194	1.03596	0.555475	0.742211	0.669521
cluster5	AT1G19330	0.610287	0.680199	0.593369	1.03807	0.914376
cluster5	AT1G29300	0.281944	0.772716	0.611428	0.850715	1.17992
cluster5	AT1G30110	0.294068	0.793261	0.670267	0.777422	1.06476
cluster5	AT1G32690	0.218959	0.345529	0.847708	0.424456	1.06656
cluster5	AT1G65840	0.467778	0.780218	0.558724	0.931592	1.09109
cluster5	AT2G02060	0.35131	0.252161	1.27381	0.340145	0.794763
cluster5	AT2G31200	0.220215	0.73931	0.686058	0.653287	1.12929
cluster5	AT3G04670	0.571072	0.717591	0.774851	1.00562	0.907054
cluster5	AT3G21352	0.253867	0.149626	1.19201	0.657746	1.2392
cluster5	AT3G21710	0.504817	0.731809	0.660293	1.21538	0.98318
cluster5	AT3G24050	0.361105	0.774091	0.624238	0.848141	1.09872
cluster5	AT3G52470	0.202337	0.780592	0.92199	0.766593	1.00286
cluster5	AT3G53780	0.498544	0.603245	1.22106	0.812794	0.674515
cluster5	AT3G54130	0.373147	0.753285	0.736744	1.04586	1.08567
cluster5	AT4G30320	0.46771	0.4877	0.709058	0.567784	1.08799
cluster5	AT5G05090	0.765836	0.367873	1.15864	0.851388	0.696412
cluster5	AT5G25540	0.509144	0.774441	0.809939	1.11135	0.910079
cluster5	AT5G43100	0.54592	0.739223	0.795714	1.03575	0.964285
cluster5	AT5G43760	0.663469	0.305761	1.07472	0.395511	0.843088
cluster5	AT5G48385	0.694955	0.582162	0.665875	1.10711	0.751822
cluster5	AT5G61440	0.668775	0.426023	0.752104	1.01131	1.14286
cluster5	AT1G13590	0.627547	0.620951	0.595538	1.14005	1.09294
cluster5	AT1G15100	0.528498	0.543855	0.777539	0.684449	1.15434
cluster5	AT1G18200	0.484565	0.572177	1.16873	0.544528	0.785918
cluster5	AT1G28200	0.479707	0.594558	0.826761	0.99395	1.16156
cluster5	AT1G51960	NaN	0.660482	1.33916	1.17777	0.36993
cluster5	AT1G52565	NaN	0.485997	1.1024	0.512099	0.963891
cluster5	AT2G16060	0.314563	0.179999	0.974095	0.396681	1.34826
cluster5	AT2G33585	0.278219	0.656179	0.951483	1.07091	1.15052
cluster5	AT2G33590	0.668131	0.656789	0.54838	0.615114	1.01955
cluster5	AT2G47260	0.507377	0.673238	0.601611	1.18132	1.25666
cluster5	AT3G06890	0.663144	0.36188	0.851475	0.349373	1.17799
cluster5	AT3G15260	0.481182	1.02502	0.528602	0.893343	0.968188
cluster5	AT3G16565	-0.23697	0.655352	0.688066	1.18751	1.86719
cluster5	AT3G25210	0.988749	0.0421657	0.939579	0.875275	1.22903
cluster5	AT4G08330	0.41986	0.629377	1.10631	0.551128	0.968647
cluster5	AT4G12090	0.288822	0.696526	0.999641	0.504804	1.08429
cluster5	AT4G14746	0.50709	0.574861	1.20344	0.980518	0.842824
cluster5	AT4G23885	0.355614	0.726946	0.828143	0.631121	1.02503
cluster5	AT4G32800	0.210354	1.5465	0.119316	0.728579	0.975919
cluster5	AT4G36220	0.759125	0.529097	1.07909	0.45669	0.677654
cluster5	AT5G03030	0.168036	0.728762	0.953246	0.821829	1.19681
cluster5	AT5G05365	0.29377	0.614164	0.643528	0.614764	1.48355
cluster5	AT5G06570	0.659308	0.659034	1.05089	0.855585	0.706607
cluster5	AT5G07910	0.536969	0.757939	0.771824	1.00225	1.07386
cluster5	AT5G13330	0.327507	0.610171	0.619061	0.883206	1.41159
cluster5	AT5G41290	0.602742	0.520977	0.905621	1.14048	NaN
cluster5	AT5G42570	0.475694	0.759828	0.867744	0.959109	1.05663
cluster5	AT1G02900	0.54943	0.597419	0.969139	1.14717	1.07777
cluster5	AT1G20460	0.3786	0.922576	0.825272	0.996927	1.02275
cluster5	AT1G23490	0.397977	0.765824	0.912148	0.707749	1.06109
cluster5	AT1G28250	0.416252	0.661051	1.05122	0.850035	1.04349
cluster5	AT1G48370	0.496003	0.839523	0.463104	0.969398	1.25609
cluster5	AT1G65820	0.283684	0.906633	0.84328	0.909311	1.13573
cluster5	AT1G68310	0.317122	0.71914	0.961608	0.959189	1.18135
cluster5	AT1G74340	0.363893	0.837938	0.789225	0.855775	1.12608
cluster5	AT2G03810	0.601694	0.873496	0.723272	0.639817	1.00207
cluster5	AT2G17130	0.510573	0.660317	0.760332	0.874229	1.15807
cluster5	AT2G22850	0.285244	1.22378	0.49251	0.881138	0.999919
cluster5	AT2G25190	0.276814	0.992978	0.787982	0.554479	1.01479
cluster5	AT2G39720	0.558064	0.505964	1.15437	0.659903	0.990516
cluster5	AT3G13110	0.236151	0.919882	0.600806	1.31664	1.34383
cluster5	AT3G44735	0.258047	0.727015	1.60354	0.385727	0.692724
cluster5	AT3G54040	0.533106	0.797428	0.692263	0.849962	1.09162
cluster5	AT3G57090	0.518569	0.879799	0.712642	0.989325	1.07703
cluster5	AT3G62690	0.664971	0.544468	0.842652	0.50114	1.22321
cluster5	AT4G01575	0.680759	0.776179	0.615443	0.780998	1.19291
cluster5	AT4G18910	0.280355	0.9204	0.800535	0.878652	1.10745
cluster5	AT5G03990	0.562963	0.883851	0.648816	0.905576	1.14037
cluster5	AT5G05440	0.0987336	0.787912	1.05959	0.570216	1.32459
cluster5	AT5G16160	0.389143	1.10663	0.648194	0.584165	0.956511
cluster5	AT5G41900	0.0452632	0.622924	1.91103	0.187298	0.981801
cluster5	AT5G52450	0.414029	0.970359	0.7304	0.41644	1.11594
cluster5	AT5G64130	0.351879	0.790698	0.85696	0.939013	1.22841
cluster5	AT1G56260	0.223537	1.01026	1.3252	0.86239	0.754894
cluster5	AT2G45210	0.162314	0.764707	1.0439	0.278028	0.868945
cluster5	AT3G05545	0.736443	0.693427	0.820626	0.981182	1.15224
cluster5	AT3G10400	0.472904	0.731105	0.90358	0.860229	1.30912
cluster5	AT3G20310	0.280239	0.784797	1.07552	0.807166	1.19192
cluster5	AT4G24730	0.46402	0.822909	0.83633	0.82323	1.26773
cluster5	AT4G33925	0.313541	1.19188	0.775764	1.14782	0.982594
cluster5	AT5G11730	0.809241	0.790663	0.868072	0.510053	1.00457
cluster5	AT5G27830	0.453634	0.747317	1.06956	1.03928	1.11614
cluster5	AT1G13260	0.975418	0.55397	1.1059	0.498319	0.991807
cluster5	AT1G15900	0.302224	1.35916	0.476483	0.7641	1.27654
cluster5	AT1G74450	0.0381603	0.916603	1.02233	1.90466	0.505605
cluster5	AT1G76250	0.21006	0.859415	1.22405	0.289001	1.36244
cluster5	AT2G15220	0.53089	0.61683	1.26233	0.637379	1.2319
cluster5	AT2G19590	0.525936	0.831936	0.567807	0.85301	1.42934
cluster5	AT2G46210	0.606759	0.821802	0.791178	1.14455	0.886878
cluster5	AT3G02000	0.651526	0.737256	1.15764	0.405854	1.19726
cluster5	AT3G61980	0.326599	0.941582	0.951381	0.928929	1.24276
cluster5	AT4G08230	0.313505	0.841609	0.783168	1.28755	1.34095
cluster5	AT5G45480	0.967573	0.52029	0.851432	0.391176	1.42797
cluster5	AT5G47710	0.390535	0.744645	0.905709	1.37289	1.23998
cluster5	AT5G64110	0.926103	0.532332	0.984075	0.748722	1.14876
cluster5	AT1G71950	0.405327	0.822459	0.919272	0.848811	1.35061
cluster5	AT2G32830	0.00531344	0.454816	0.865001	0.435526	1.38231
cluster5	AT2G35290	-0.0755748	0.904536	1.60875	0.602616	1.24101
cluster5	AT2G35770	0.819921	0.856082	0.874368	0.653231	1.16445
cluster5	AT3G11260	0.397602	1.47233	0.439384	0.466161	1.29557
cluster5	AT3G23440	-0.13923	0.668265	1.26738	0.358543	1.34504
cluster5	AT3G51790	0.42198	0.910304	0.820289	0.9768	1.29919
cluster5	AT4G17670	0.374401	1.03635	1.25638	0.258558	1.1827
cluster5	AT5G03890	0.517064	1.01968	0.864504	0.807365	1.21655
cluster5	AT5G12390	0.419893	0.900072	0.890044	1.23931	1.15934
cluster5	AT5G36290	0.599187	0.814797	0.963935	0.864582	1.20392
cluster5	AT5G44390	0.828393	0.794305	1.26971	0.688397	0.965866
cluster5	AT5G55050	0.916043	0.714378	1.99019	-0.305351	0.758251
cluster5	AT1G63930	0.765895	0.548598	1.16668	1.05684	1.14273
cluster5	AT2G16595	0.735966	0.936804	1.05574	0.748361	0.99453
cluster5	AT2G36300	0.409654	0.778859	1.17892	0.88652	1.29622
cluster5	AT3G16990	0.613944	0.921888	1.01784	0.927974	1.09655
cluster5	AT3G54020	0.666812	0.810376	1.06046	1.16388	0.671996
cluster5	AT4G04800	0.740669	0.882005	0.615744	0.421637	1.57447
cluster5	AT2G21900	NaN	1.19709	NaN	0.524803	NaN
cluster5	AT3G02140	0.452973	1.06997	0.736214	1.17607	1.2336
cluster5	AT4G08040	1.17524	1.22071	1.61585	-0.114281	0.673979
cluster5	AT4G10040	0.691305	0.768779	0.842794	0.710163	1.48857
cluster5	AT4G24370	0.332396	0.822543	0.984003	0.955263	1.50579
cluster5	AT5G14470	0.59498	0.979436	0.835386	0.923603	1.30883
cluster5	AT5G47120	0.36245	0.874837	0.952337	1.00464	1.41902
cluster5	AT5G59520	0.436539	0.997971	1.00473	0.765353	1.41057
cluster5	AT1G15125	-0.0103905	1.2136	0.980563	0.678354	1.59356
cluster5	AT1G19300	0.57237	0.834561	0.845028	0.645689	1.59228
cluster5	AT1G29670	0.69597	0.956796	1.38759	0.925258	0.835487
cluster5	AT1G65730	0.848867	0.616433	2.21953	0.668827	0.663402
cluster5	AT2G32380	0.377672	0.869745	1.11894	0.875295	1.39792
cluster5	AT2G37820	0.384932	0.854211	1.02279	0.85427	1.51281
cluster5	AT2G37970	0.554921	0.76551	0.653695	1.24821	0.810227
cluster5	AT3G12400	0.737023	0.843022	1.06795	0.939975	1.17469
cluster5	AT3G47830	0.546728	0.918399	0.778156	1.22188	0.633309
cluster5	AT3G56030	0.474033	0.963396	1.21444	0.965982	1.23596
cluster5	AT4G11655	0.217672	0.513132	1.35423	1.41431	1.43575
cluster5	AT4G36010	0.0890361	1.23184	0.711802	0.597766	1.84086
cluster5	AT5G53310	0.616514	0.853977	0.857171	1.15288	1.11779
cluster5	AT1G07175	0.411898	0.875296	1.27712	0.925436	1.38431
cluster5	AT1G16370	0.464688	0.967227	1.0006	1.52196	0.792546
cluster5	AT1G47480	0.582199	1.10029	1.11897	1.17388	1.00709
cluster5	AT1G65520	0.400799	1.14563	0.929004	0.67593	1.58969
cluster5	AT2G36320	0.551357	0.745781	1.13842	1.16519	1.28779
cluster5	AT2G36330	0.6891	1.02136	1.12291	0.90724	1.15938
cluster5	AT3G12630	0.441487	0.882031	1.05737	1.05421	1.41354
cluster5	AT3G57380	0.664082	1.40088	0.76376	0.486575	0.998012
cluster5	AT4G09030	0.689146	0.99665	0.663623	0.723603	1.4652
cluster5	AT4G17650	0.302886	0.905754	0.923564	1.09246	1.62458
cluster5	AT4G26470	0.441188	0.978991	0.607749	1.30821	0.918944
cluster5	AT4G27480	1.39216	0.124544	1.64478	0.49114	0.750645
cluster5	AT5G50790	0.0968572	0.766207	0.703767	0.812179	2.27541
cluster5	AT5G56170	0.564858	0.973299	1.04146	1.06636	1.26611
cluster5	AT5G58110	0.762086	0.764157	0.849738	0.928215	1.16046
[truncated: 2,736 more rows]
