# Supplementary material for: Gene expression evolution in pattern-triggered immunity within Arabidopsis thaliana and across Brassicaceae species
Source: Plant Cell. 2021 Mar 5;33(6):1863–87. doi: 10.1093/plcell/koab073 (PMC8290292; doi:10.1093/plcell/koab073)
Supplement: koab073_Supplementary_Data [file koab073_supplementary_data.zip › tpc.00600.2020-s06.xlsx]

## Sheet: Supplemental Data Set 5
Supplemental Data. Winkelmüller, Entila, Anver et al. (2021). Gene expression evolution in pattern-triggered immunity within Arabidopsis thaliana and across Brassicaceae species. Plant Cell.
Supplemental Data Set 6. Expression changes (log2) of DEGs in Figure 5A.
cluster	Arabidopsis_thaliana	Capsella_rubella	Cardamine_hirsuta	Eutrema_salsugineum	Ath	Can0	Gy0	Kn0	Kon	No0	Cru	Chi	Esa
cluster1_green_Ath	AT1G01140	Carubv10009130	CARHR001330	Thhalv10007632	0.562165	1.03721	0.462486	0.532704	0.133528	0.362063	-1.01778	-0.195002	-0.0479626
cluster1_green_Ath	AT1G01950	Carubv10008265	CARHR000400	Thhalv10006753	0.31708	0.498058	1.27566	-0.0189598	0.451524	0.34379	0.285154	0.0578732	-0.156714
cluster1_green_Ath	AT1G03210	Carubv10009900	CARHR002540	Thhalv10008339	0.200047	0.563432	0.48242	0.403968	1.01764	0.735535	-0.202715	-0.324965	0.877268
cluster1_green_Ath	AT1G03430	Carubv10010558	CARHR002780	Thhalv10009010	0.553903	0.871742	0.916883	1.05649	0.680753	1.21084	0.499811	-0.590604	0.218108
cluster1_green_Ath	AT1G03940	Carubv10011644	CARHR003280	Thhalv10007549	-0.0368905	1.7729	1.48509	-0.422349	2.22884	0.781269	-1.531	-1.09025	-0.15046
cluster1_green_Ath	AT1G05650	Carubv10011292	CARHR005170	Thhalv10007830	0.686607	0.95282	1.6325	0.610732	1.6166	1.56124	-0.783103	0.4224	-1.1641
cluster1_green_Ath	AT1G06570	Carubv10009131	CARHR006180	Thhalv10007634	0.712471	0.43872	0.515874	0.449934	1.09606	0.666131	0.0800452	-0.0173415	0.0748744
cluster1_green_Ath	AT1G07020	Carubv10012654	CARHR006710	Thhalv10008798	0.561763	0.629243	0.987055	1.29155	1.40646	1.38341	0.150233	0.218449	-0.491778
cluster1_green_Ath	AT1G07130	Carubv10010524	CARHR006820	Thhalv10008979	0.712157	1.10152	0.685344	0.922919	1.09963	1.82893	-0.679476	0.457075	-0.502333
cluster1_green_Ath	AT1G07150	Carubv10008850	CARHR006860	Thhalv10007482	0.600665	0.290085	0.208358	-0.0683895	1.25651	0.369946	0.964708	-0.4067	-0.118285
cluster1_green_Ath	AT1G07220	Carubv10008891	CARHR006940	Thhalv10007804	1.19405	0.733521	0.913308	0.284608	0.673147	0.707725	0.202927	-0.0794751	-0.418901
cluster1_green_Ath	AT1G08350	Carubv10008667	CARHR008230	Thhalv10007170	0.54606	1.72219	0.932917	0.734124	1.43574	1.07501	-0.247186	-0.0600471	0.149753
cluster1_green_Ath	AT1G08670	Carubv10011520	CARHR008600	Thhalv10008666	0.298208	0.275813	1.51153	0.0779772	0.828768	0.95384	0.0355368	0.10558	1.29931
cluster1_green_Ath	AT1G09815	Carubv10010654	CARHR009820	Thhalv10009118	0.427599	0.24323	0.667898	0.476821	1.00774	1.14296	0.0337188	-0.194098	-0.275134
cluster1_green_Ath	AT1G10170	Carubv10008145	CARHR010270	Thhalv10006708	0.924201	1.76816	0.754806	0.647483	0.635995	1.4193	-0.466914	0.926368	0.901547
cluster1_green_Ath	AT1G10740	Carubv10009032	CARHR010930	Thhalv10007563	0.135632	0.994577	0.335545	0.640632	1.18154	0.978019	-0.067021	-0.157564	1.56592
cluster1_green_Ath	AT1G11000	Carubv10008710	CARHR011210	Thhalv10007202	0.767452	1.24138	0.847904	0.165761	0.711388	0.464561	0.637912	-0.0596692	-0.0457986
cluster1_green_Ath	AT1G11125	Carubv10010002	CARHR011330	Thhalv10008484	0.0536448	1.26937	0.796949	1.07968	0.599373	0.933699	0.696716	0.252506	-0.215999
cluster1_green_Ath	AT1G11540	Carubv10011874	CARHR011820	Thhalv10007599	0.527575	0.79862	1.15975	0.757555	1.17355	1.52322	0.333035	1.15517	-0.202606
cluster1_green_Ath	AT1G11960	Carubv10008363	CARHR012310	Thhalv10006870	0.749103	1.20494	0.25383	0.706811	1.04596	0.298951	-0.137726	0.187358	1.39043
cluster1_green_Ath	AT1G12420	Carubv10009162	CARHR012710	Thhalv10007972	0.310442	1.08389	0.334558	-0.200972	1.76704	0.505395	0.452544	1.30724	-0.629251
cluster1_green_Ath	AT1G12790	Carubv10012622	CARHR013100	Thhalv10008579	0.577533	1.16318	1.42352	0.0638799	0.859389	1.16421	-0.198905	-0.00844903	0.987592
cluster1_green_Ath	AT1G12950	Carubv10011529	CARHR013300	Thhalv10007376	1.14481	0.478805	0.197384	0.356468	0.426762	0.608311	-0.316203	0.909464	-0.457392
cluster1_green_Ath	AT1G12970	Carubv10009069	CARHR013310	Thhalv10007575	0.432592	0.492497	0.708984	1.0296	1.33831	1.28847	-0.309714	0.288344	-0.36671
cluster1_green_Ath	AT1G13180	Carubv10009216	CARHR013550	Thhalv10007702	0.59691	1.07843	0.735126	0.620454	1.09292	0.938856	0.831916	0.604682	-0.108752
cluster1_green_Ath	AT1G14750	Carubv10010916	CARHR015280	Thhalv10009486	0.474423	0.85727	0.524355	0.577078	1.43961	1.14646	-0.122744	-1.29228	-0.0566319
cluster1_green_Ath	AT1G15125	Carubv10009591	CARHR015660	Thhalv10008074	0.913807	-0.0312664	1.17809	0.945903	0.653995	1.54514	0.907892	-0.0173415	0.17697
cluster1_green_Ath	AT1G15400	Carubv10010935	CARHR015940	Thhalv10009053	0.49805	0.818592	1.13677	1.04214	1.61605	1.27517	0.0496892	0.874297	0.756359
cluster1_green_Ath	AT1G15900	Carubv10011590	CARHR016410	Thhalv10009838	0.520321	0.401638	1.29395	0.442012	0.787744	1.19351	0.126394	1.44152	0.360272
cluster1_green_Ath	AT1G16220	Carubv10011374	CARHR016690	Thhalv10007474	-0.0469569	1.51994	1.1229	0.213684	1.73317	1.07506	0.376777	-0.0871033	-0.580921
cluster1_green_Ath	AT1G16370	Carubv10011578	CARHR016850	Thhalv10007384	0.337325	0.555657	0.947376	0.966489	1.50563	0.741477	-0.219506	0.416105	1.09155
cluster1_green_Ath	AT1G16480	Carubv10011798	CARHR016950	Thhalv10006722	1.0257	1.70752	0.276719	0.451377	0.00522507	1.08399	0.550983	-0.373323	-0.22378
cluster1_green_Ath	AT1G16540	Carubv10011147	CARHR017020	Thhalv10006808	0.472099	1.17285	0.0696262	-0.479005	0.740862	0.706053	-0.469771	0.707455	-0.305649
cluster1_green_Ath	AT1G17160	Carubv10009429	CARHR017740	Thhalv10007918	0.593234	0.727717	0.939561	0.700036	1.19907	1.0544	0.490897	-0.0962562	0.566249
cluster1_green_Ath	AT1G17230	Carubv10008143	CARHR017840	Thhalv10006611	1.08312	0.525446	0.230689	-0.0923137	0.224134	0.571418	0.266497	0.364202	-0.377871
cluster1_green_Ath	AT1G17500	Carubv10008113	CARHR018100	Thhalv10006585	1.10321	1.30499	0.651026	0.372749	0.612655	1.03998	0.229608	0.514784	0.946855
cluster1_green_Ath	AT1G17550	Carubv10009389	CARHR018160	Thhalv10007386	0.371559	1.27452	0.840607	-0.141756	0.510444	0.0482138	-0.544075	0.275016	0.00379649
cluster1_green_Ath	AT1G18160	Carubv10012038	CARHR018720	Thhalv10006685	0.792778	1.19019	0.458498	0.190204	1.03029	0.680463	0.524246	0.196969	0.0423142
cluster1_green_Ath	AT1G18590	Carubv10012097	CARHR019210	Thhalv10008073	1.08986	-0.586116	0.402907	-0.00540064	1.36673	0.777211	-0.368836	0.487611	0.266091
cluster1_green_Ath	AT1G18900	Carubv10008274	CARHR019550	Thhalv10009547	1.34716	2.10377	1.43983	0.31325	1.54163	1.55335	0.141805	0.123859	-0.741497
cluster1_green_Ath	AT1G19240	Carubv10010715	CARHR019840	Thhalv10009175	0.308038	0.603728	0.97663	0.96982	1.25852	1.30409	-0.434492	-0.610248	-0.0555904
cluster1_green_Ath	AT1G19300	Carubv10012618	CARHR019890	Thhalv10008059	0.600584	0.58954	0.79104	0.802779	0.626515	1.55561	0.728587	-0.0742293	0.82023
cluster1_green_Ath	AT1G19330	Carubv10010116	CARHR019920	Thhalv10008586	-0.429211	0.621697	0.646135	0.558017	1.01342	0.851073	0.395753	0.507306	0.0910044
cluster1_green_Ath	AT1G19670	Carubv10009755	CARHR020190	Thhalv10008201	-0.126239	-0.377612	1.19041	0.204671	1.49073	1.01263	-1.46416	-1.51183	-0.119184
cluster1_green_Ath	AT1G19840	Carubv10010532	CARHR020340	Thhalv10009868	1.07031	0.478591	0.260507	0.87426	1.00424	0.26923	-0.406521	-0.946154	-0.777448
cluster1_green_Ath	AT1G19970	Carubv10010001	CARHR020460	Thhalv10008458	0.365077	1.29163	1.48653	1.27567	1.36406	1.8887	-0.403251	-0.199124	-0.801406
cluster1_green_Ath	AT1G20700	Carubv10010349	CARHR021150	Thhalv10008824	-0.0744934	0.352037	0.673086	0.382934	1.17993	0.978658	0.848799	0.362231	-0.0806415
cluster1_green_Ath	AT1G21070	Carubv10009605	CARHR021520	Thhalv10008081	0.450209	1.32736	1.16541	1.07877	1.35387	1.20335	-1.03954	0.0580729	-0.0861883
cluster1_green_Ath	AT1G21280	Carubv10006150	CARHR217380	Thhalv10009460	0.235426	0.203816	0.602339	1.38272	0.877523	0.946139	0.280246	-0.0173415	0.338165
cluster1_green_Ath	AT1G23220	Carubv10010634	CARHR023680	Thhalv10009103	0.46104	0.641954	0.852061	0.815772	1.05867	1.32677	-0.203836	0.0452906	-0.0505946
cluster1_green_Ath	AT1G23490	Carubv10002073	CARHR023910	Thhalv10008884	0.360866	0.407058	0.735456	0.874382	0.684418	1.0112	-0.153506	1.03353	0.427315
cluster1_green_Ath	AT1G23560	Carubv10009689	CARHR023990	Thhalv10008158	1.12638	0.914736	1.42436	0.771536	1.16936	0.780645	-0.576766	-0.483923	1.34996
cluster1_green_Ath	AT1G24100	Carubv10009070	CARHR024390	Thhalv10007574	1.07119	-0.251851	0.130117	0.110581	1.89881	1.36591	-0.0547013	-0.187896	0.376277
cluster1_green_Ath	AT1G25550	Carubv10009492	CARHR025900	Thhalv10008115	0.868137	1.03276	1.2317	1.07228	1.67746	1.51455	-0.0377927	0.563947	0.715587
cluster1_green_Ath	AT1G26200	Carubv10012109	CARHR025710	Thhalv10008634	0.585204	0.58721	1.57024	-0.126643	0.0585325	0.764512	-0.0211846	-0.0293295	-0.0576514
cluster1_green_Ath	AT1G27740	Carubv10011072	CARHR027250	Thhalv10009862	1.25435	0.645024	0.521687	0.248266	1.56954	1.47495	-0.72389	1.11174	0.506187
cluster1_green_Ath	AT1G27910	Carubv10008370	CARHR027340	Thhalv10006874	0.874874	1.35453	0.842583	0.453023	0.730008	1.25936	-0.151416	0.215208	0.724553
cluster1_green_Ath	AT1G29050	Carubv10009422	CARHR028270	Thhalv10007896	0.816467	0.142578	0.804479	0.619293	1.13539	1.13123	0.444211	-0.373608	0.328684
cluster1_green_Ath	AT1G29120	Carubv10009109	CARHR028440	Thhalv10007940	1.25032	0.585492	1.14046	1.24093	1.88295	1.93686	-0.0319803	-0.17796	0.163566
cluster1_green_Ath	AT1G29300	Carubv10011192	CARHR028620	Thhalv10007535	0.996233	0.283164	0.714552	0.578451	0.82581	1.13553	-0.355091	0.773828	-0.326662
cluster1_green_Ath	AT1G30110	Carubv10010189	CARHR029300	Thhalv10008899	0.343571	0.311268	0.751808	0.635134	0.74155	1.02075	0.712235	-1.39774	0.245152
cluster1_green_Ath	AT1G30540	Carubv10009648	CARHR029950	Thhalv10008046	0.713055	0.974118	0.509938	0.606273	1.23874	0.705829	0.620821	-0.0924503	0.00729091
cluster1_green_Ath	AT1G31220	Carubv10010847	CARHR030700	Thhalv10008369	0.294255	0.838009	1.02164	0.814664	1.21174	1.63478	-0.34627	-0.287182	-0.357862
cluster1_green_Ath	AT1G31310	Carubv10012336	CARHR030770	Thhalv10007862	-1.07324	0.307367	0.0190829	-0.154375	0.559979	1.11766	0.193375	0.0545204	0.375012
cluster1_green_Ath	AT1G31340	Carubv10010534	CARHR030810	Thhalv10008986	0.564691	0.691953	0.495655	0.442498	1.16295	0.640107	0.292056	0.203663	-0.0590879
cluster1_green_Ath	AT1G31460	Carubv10012628	CARHR030980	Thhalv10008233	0.541065	0.825073	0.85171	0.326909	1.44343	1.21943	-0.290684	-0.61838	0.37405
cluster1_green_Ath	AT1G32330	Carubv10008952	CARHR031680	Thhalv10008238	1.10103	0.886441	0.561271	0.348851	0.17091	0.734976	0.261863	0.493506	-0.143105
cluster1_green_Ath	AT1G32640	Carubv10008586	CARHR032070	Thhalv10007075	0.77276	0.822105	1.07151	0.695829	1.65142	1.27853	0.54066	0.590641	0.199311
cluster1_green_Ath	AT1G34220	Carubv10008690	CARHR033730	Thhalv10007134	0.711099	1.0218	0.255808	0.0258152	0.17463	0.422293	0.241672	0.458744	0.298131
cluster1_green_Ath	AT1G35140	Carubv10009822	CARHR262000	Thhalv10001826	0.0325796	-0.141319	0.606549	0.673001	2.08231	1.64018	-0.363652	1.56099	1.26508
cluster1_green_Ath	AT1G37130	Carubv10008249	CARHR034720	Thhalv10003628	1.09788	0.961561	0.673032	0.563714	0.631815	0.811163	0.0247231	-0.250916	-0.701917
cluster1_green_Ath	AT1G42470	Carubv10008106	CARHR292420	Thhalv10016155	0.680359	1.52089	0.553736	0.479725	1.1225	1.07759	-0.931446	1.14175	-0.219754
cluster1_green_Ath	AT1G43780	Carubv10009034	CARHR035490	Thhalv10011445	1.52649	0.470433	0.432595	0.0583577	0.348197	0.469096	-1.49788	-0.634849	0.1247
cluster1_green_Ath	AT1G44160	Carubv10011360	CARHR035830	Thhalv10011600	-0.0964604	0.791565	0.27511	0.0380225	0.893834	-0.15017	-1.22432	0.24288	0.668458
cluster1_green_Ath	AT1G47480	Carubv10009807	CARHR037040	Thhalv10012081	1.04465	0.583959	1.07399	1.09115	1.15015	0.929933	0.635119	0.0596853	-0.273979
cluster1_green_Ath	AT1G47530	Carubv10008985	CARHR037100	Thhalv10011437	0.601238	1.3715	0.928342	0.556824	0.478779	1.65429	-0.528304	-0.174755	-0.226399
cluster1_green_Ath	AT1G48320	Carubv10010536	CARHR037940	Thhalv10011840	0.554917	0.915512	0.977889	1.01554	1.23199	1.05337	-0.286033	0.895794	-0.494483
cluster1_green_Ath	AT1G50440	Carubv10010073	CARHR040450	Thhalv10011737	0.855879	1.3138	1.36873	0.880537	1.7751	1.66665	0.81146	-0.134166	0.534574
cluster1_green_Ath	AT1G51340	Carubv10008894	CARHR041410	Thhalv10011401	0.453598	0.214395	1.01333	0.102073	0.438056	0.791832	-1.49158	0.137068	0.0897627
cluster1_green_Ath	AT1G52050	Carubv10012623	CARHR042190	Thhalv10011670	1.62043	0.501011	0.481017	0.596971	0.53182	0.533644	0.53222	-0.732316	-1.18413
cluster1_green_Ath	AT1G52070	Carubv10012594	CARHR042220	Thhalv10011638	1.32254	0.343165	0.203716	0.434559	0.383387	0.32538	0.309903	0.615495	-0.784391
cluster1_green_Ath	AT1G52565	Carubv10011799	CARHR042690	Thhalv10011857	0.581005	0.0458702	0.486132	1.09704	0.46849	0.889454	0.463242	-0.0323671	1.1172
cluster1_green_Ath	AT1G54170	Carubv10008656	CARHR044520	Thhalv10011331	0.626232	1.13509	0.553989	0.266299	0.488002	0.531187	0.716172	0.21682	0.190309
cluster1_green_Ath	AT1G54400	Carubv10021021	CARHR055530	Thhalv10023940	0.555521	0.000121	0.421641	-0.422258	0.452618	2.40937	0.363092	0.407317	-0.225914
cluster1_green_Ath	AT1G54960	Carubv10019920	CARHR284470	Thhalv10023309	0.175718	1.60004	0.117014	0.103949	0.381414	-0.249405	0.41549	-0.103423	-0.0491175
cluster1_green_Ath	AT1G55080	Carubv10010152	CARHR044670	Thhalv10022201	0.208217	0.270269	0.591072	0.0886695	0.580207	1.04707	-0.370506	-0.182007	-0.488712
cluster1_green_Ath	AT1G55110	Carubv10008958	CARHR044700	Thhalv10011450	0.942414	1.20539	0.933249	0.90798	1.3308	0.991518	0.142438	-0.274083	-1.09752
cluster1_green_Ath	AT1G55120	Carubv10008754	CARHR044710	Thhalv10011339	1.30086	0.885595	0.837124	0.783325	1.1132	0.957382	0.391161	0.0690417	-0.297704
cluster1_green_Ath	AT1G55460	Carubv10009308	CARHR045130	Thhalv10011527	0.746576	1.38311	1.0448	1.20061	1.40158	1.65666	-0.0019	0.403243	1.22128
cluster1_green_Ath	AT1G55530	Carubv10009589	CARHR045210	Thhalv10012351	0.206246	0.0902561	0.56322	0.401086	0.788371	0.772545	1.09677	0.321363	-0.236063
cluster1_green_Ath	AT1G56260	Carubv10021142	CARHR289820	Thhalv10023757	-0.00876158	0.189854	0.974741	1.26963	0.820608	0.732168	1.08957	-0.361442	-0.25869
cluster1_green_Ath	AT1G58070	Carubv10021763	CARHR053990	Thhalv10023811	1.36233	-0.0226459	0.116696	0.194298	0.808206	0.337567	0.866451	0.140448	-0.141478
cluster1_green_Ath	AT1G58100	Carubv10020411	CARHR053950	Thhalv10023507	0.520425	0.641078	0.915589	1.10586	1.01228	1.66579	0.771873	0.0377897	0.294559
cluster1_green_Ath	AT1G58170	Carubv10022469	CARHR053910	Thhalv10023714	-0.0347349	-0.0817038	0.652816	0.244971	-0.131463	1.02081	0.00333301	-0.539509	-0.670333
cluster1_green_Ath	AT1G58200	Carubv10019907	CARHR053820	Thhalv10023336	0.396101	1.21559	0.54791	0.0488186	1.07834	0.276309	0.0200987	-0.291456	0.0755958
cluster1_green_Ath	AT1G63090	Carubv10020482	CARHR048420	Thhalv10023623	0.324032	0.527143	1.71724	0.50575	1.27037	1.64375	1.01318	0.141348	0.0399624
cluster1_green_Ath	AT1G63820	Carubv10022040	CARHR047380	Thhalv10023638	1.1585	0.341635	-0.655541	1.12398	2.16002	1.86118	0.0497865	0.207277	0.102056
cluster1_green_Ath	AT1G64100	Carubv10019976	CARHR048250	Thhalv10023907	1.47461	0.0460954	0.214129	-0.692176	2.00961	3.33151	-0.522107	-1.86045	-1.16025
cluster1_green_Ath	AT1G64385	Carubv10020548	CARHR046550	Thhalv10023582	1.06138	-0.393005	1.52413	1.05183	0.377061	1.73197	-0.28788	0.0771111	-0.215729
cluster1_green_Ath	AT1G64760	Carubv10013602	CARHR055430	Thhalv10022665	0.376993	1.5189	0.872108	1.36975	1.03218	1.55938	0.017931	1.40792	-0.275517
cluster1_green_Ath	AT1G65840	Carubv10020181	CARHR057700	Thhalv10018447	1.25393	0.490016	0.74813	0.525167	0.907305	1.03776	0.277011	1.02042	0.27193
cluster1_green_Ath	AT1G66570	Carubv10006922	CARHR179040	Thhalv10023916	2.42674	2.26956	0.380634	0.27519	1.65554	0.793465	0.280246	-0.0173415	0.328906
cluster1_green_Ath	AT1G66680	Carubv10020434	CARHR058730	Thhalv10018777	0.509399	1.47879	0.879773	0.77667	1.8787	1.18595	0.785208	0.282227	0.378791
cluster1_green_Ath	AT1G66760	Carubv10020514	CARHR058860	Thhalv10018475	0.165299	0.576162	0.418394	0.663373	1.11224	0.770967	-0.16807	0.314491	0.335933
cluster1_green_Ath	AT1G66830	Carubv10019896	CARHR058940	Thhalv10018224	1.6864	1.60106	-0.372537	0.534869	-0.0965157	0.438014	-2.31917	0.576309	-0.645976
cluster1_green_Ath	AT1G67340	Carubv10020405	CARHR059880	Thhalv10018922	0.215002	0.636927	0.793448	1.26569	1.08371	1.309	0.0610946	0.824931	0.0985121
cluster1_green_Ath	AT1G67530	Carubv10019833	CARHR060100	Thhalv10018154	0.692843	1.76804	0.612727	-0.0904012	0.824054	0.715483	1.26629	-0.332539	-0.19148
cluster1_green_Ath	AT1G68230	Carubv10020939	CARHR060920	Thhalv10019125	1.9626	-0.129886	0.277755	0.384103	0.686933	0.483461	-0.0261795	0.31967	0.792498
cluster1_green_Ath	AT1G68310	Carubv10021083	CARHR060990	Thhalv10019265	0.441028	0.324151	0.679666	0.934529	0.935942	1.13501	0.0986511	-0.0996512	-0.310971
cluster1_green_Ath	AT1G69430	Carubv10020641	CARHR062320	Thhalv10018794	0.805282	0.814192	1.4774	1.83616	2.24936	1.80857	-0.456458	-0.714291	-0.793056
cluster1_green_Ath	AT1G69550	Carubv10019662	CARHR071800	Thhalv10024211	0.708129	0.975898	0.65582	0.749444	0.472695	0.678678	-1.35297	0.451218	1.3956
cluster1_green_Ath	AT1G70700	Carubv10020780	CARHR063960	Thhalv10018961	0.303148	-0.0858681	1.00605	0.490838	2.03584	1.3765	-0.230707	0.123048	1.33868
cluster1_green_Ath	AT1G70780	Carubv10021392	CARHR064040	Thhalv10019542	-0.0509235	-0.0578883	0.432595	0.312789	0.348197	0.469096	-1.03351	0.232254	-0.410121
cluster1_green_Ath	AT1G70990	Carubv10021123	CARHR064270	Thhalv10019710	1.18891	-0.235179	0.0897754	0.548989	1.59109	1.50625	-0.430433	-2.07462	-0.646774
cluster1_green_Ath	AT1G72300	Carubv10022303	CARHR065190	Thhalv10018044	0.62384	1.10805	0.588339	0.416487	0.718402	0.596173	0.711602	0.102839	-0.0713084
cluster1_green_Ath	AT1G72750	Carubv10020993	CARHR065670	Thhalv10019450	0.29183	0.0851967	0.497391	0.663777	0.718367	1.06495	0.355632	-0.0173558	0.179129
cluster1_green_Ath	AT1G74340	Carubv10021766	CARHR067600	Thhalv10019650	-0.0478201	0.375383	0.792857	0.754523	0.822303	1.07773	0.463437	0.354781	0.0255697
cluster1_green_Ath	AT1G74450	Carubv10020351	CARHR067720	Thhalv10018683	0.729328	0.0814488	0.873735	0.989972	1.87812	0.441171	0.436943	0.710526	0.402217
cluster1_green_Ath	AT1G74950	Carubv10020844	CARHR068270	Thhalv10019039	0.393216	0.468486	0.796856	0.134022	1.09621	0.508831	0.76097	-0.186639	0.798169
cluster1_green_Ath	AT1G76065	Carubv10021228	CARHR069590	Thhalv10019391	0.266531	0.993699	1.26522	1.223	1.87388	1.97221	-0.215423	-0.345851	-0.0267717
cluster1_green_Ath	AT1G76440	Carubv10020967	CARHR070000	Thhalv10019300	0.80025	1.39951	1.70343	0.905684	1.96695	1.93243	0.15828	-0.135626	-0.127781
cluster1_green_Ath	AT1G76560	Carubv10021134	CARHR070110	Thhalv10019316	0.378013	0.499955	0.434643	0.896687	1.30798	-0.0890706	0.133024	-0.0173415	-0.219068
cluster1_green_Ath	AT1G76850	Carubv10022407	CARHR070360	Thhalv10018046	0.702777	1.20315	0.284982	-0.457404	0.627795	0.365485	0.52981	0.173659	0.0559242
cluster1_green_Ath	AT1G77360	Carubv10021564	CARHR070840	Thhalv10018469	0.634135	0.536168	1.41208	0.749144	2.47257	1.29383	-0.257692	0.458452	0.220708
cluster1_green_Ath	AT1G77370	Carubv10021140	CARHR070850	Thhalv10005112	0.0303819	0.177984	0.693553	0.693262	1.18683	1.05566	0.635305	0.637021	0.184292
cluster1_green_Ath	AT1G77890	Carubv10020261	CARHR071380	Thhalv10018451	0.726388	1.93331	0.642994	0.121713	0.838333	1.36926	0.394432	0.616436	-0.342076
cluster1_green_Ath	AT1G78000	Carubv10021409	CARHR071460	Thhalv10018244	1.12169	1.31346	1.1198	0.320692	1.06225	1.48067	0.595986	-0.44538	-0.919873
cluster1_green_Ath	AT1G78420	Carubv10020395	CARHR071940	Thhalv10018644	0.667102	0.976527	0.743557	0.539311	1.28909	0.75699	0.230457	0.512122	0.641233
cluster1_green_Ath	AT1G78955	Carubv10019844	CARHR072570	Thhalv10018165	0.746711	1.23526	1.00789	0.397825	0.851999	0.164659	-0.0703849	0.146876	-0.147699
cluster1_green_Ath	AT1G79380	Carubv10022131	CARHR073030	Thhalv10018670	0.430265	1.22279	0.500282	0.175765	0.924111	0.325865	0.475976	0.233896	0.112898
cluster1_green_Ath	AT1G80190	Carubv10018049	CARHR074290	Thhalv10019155	0.0751379	1.09522	0.387503	0.066861	0.929462	1.14302	-0.343963	0.373911	0.0852988
cluster1_green_Ath	AT1G80290	Carubv10016140	CARHR074200	Thhalv10000547	0.558693	0.926962	0.994732	0.955598	1.10546	0.72514	0.268276	0.717339	-0.0716349
cluster1_green_Ath	AT2G01150	Carubv10018154	CARHR143700	Thhalv10001158	0.377112	0.718649	1.43141	1.09629	1.48754	1.58941	0.350469	-0.309437	-0.578735
cluster1_green_Ath	AT2G02060	Carubv10017538	CARHR144700	Thhalv10004791	0.248694	0.374454	0.178345	1.23465	0.245058	0.753624	-0.672307	-0.131586	-1.1144
cluster1_green_Ath	AT2G03020	Carubv10006396	CARHR223020	Thhalv10026831	-0.127226	0.705914	1.22423	0.19373	1.02044	2.02599	0.280246	-0.0173415	0.353812
cluster1_green_Ath	AT2G03505	Carubv10017928	CARHR145850	Thhalv10005040	0.952727	2.21356	1.30673	1.62914	1.76848	1.38918	-0.559379	0.629309	-0.7092
cluster1_green_Ath	AT2G11810	Carubv10013637	CARHR104980	Thhalv10022676	2.56914	0.284791	-0.0839343	0.125103	0.28937	-0.0227827	-0.756659	0.328316	-0.687075
cluster1_green_Ath	AT2G14255	Carubv10013561	CARHR105290	Thhalv10022988	0.0445668	1.3766	0.960048	0.583937	1.87581	1.44098	-0.760875	-0.142513	0.06452
cluster1_green_Ath	AT2G14750	Carubv10014222	CARHR286460	Thhalv10022805	1.22488	0.26109	1.26446	0.768259	2.42008	1.97518	0.312706	0.558222	0.343853
cluster1_green_Ath	AT2G16595	Carubv10014348	CARHR106800	Thhalv10022826	0.480267	0.807863	0.902872	1.01549	0.708522	0.954547	-0.217101	0.803085	1.35593
cluster1_green_Ath	AT2G16700	Carubv10014867	CARHR106910	Thhalv10022900	0.20453	0.392887	0.494662	1.01781	2.56606	0.317437	0.911687	0.294061	-0.251946
cluster1_green_Ath	AT2G16760	Carubv10014157	CARHR142750	Thhalv10001544	1.67036	0.184273	0.558601	0.627711	0.757938	0.694643	0.471143	0.116309	-0.079962
cluster1_green_Ath	AT2G17430	Carubv10015854	CARHR107600	Thhalv10023186	-0.641872	0.8796	0.958149	0.0613391	0.728151	2.63036	0.29076	0.49982	-0.00298951
cluster1_green_Ath	AT2G17480	Carubv10015833	CARHR107650	Thhalv10022612	1.04946	1.11424	1.00318	0.749071	1.74158	0.868546	0.677169	0.307577	-0.33793
cluster1_green_Ath	AT2G17530	Carubv10013734	CARHR107700	Thhalv10022695	0.452838	0.928113	0.75923	0.408353	1.07364	0.918848	0.729714	0.44933	-0.386526
cluster1_green_Ath	AT2G17570	Carubv10014285	CARHR107760	Thhalv10023082	1.05665	1.07997	1.21331	1.15931	1.28143	-0.453992	0.402358	-0.155885	-0.488656
cluster1_green_Ath	AT2G19050	Carubv10015923	CARHR109570	Thhalv10022764	2.69702	-0.859976	0.234415	1.18593	2.51467	1.51711	0.800814	-0.998683	-0.0308887
cluster1_green_Ath	AT2G19590	Carubv10014231	CARHR110030	Thhalv10002047	1.25021	0.523939	0.815698	0.545884	0.834729	1.33623	0.4014	0.30044	0.589011
cluster1_green_Ath	AT2G19800	Carubv10014217	CARHR110260	Thhalv10002046	0.950501	1.47219	1.70637	1.14936	1.63026	1.70718	-0.476635	0.631331	0.837272
cluster1_green_Ath	AT2G20080	Carubv10016269	CARHR110580	Thhalv10002311	-0.396838	1.64298	0.301218	0.180339	2.11311	1.32331	1.27598	-0.733087	-0.804386
cluster1_green_Ath	AT2G20110	Carubv10013361	CARHR110630	Thhalv10001964	0.770756	1.26818	1.17484	0.356867	1.10928	1.06705	0.923158	0.518771	-0.708809
cluster1_green_Ath	AT2G20610	Carubv10013645	CARHR111240	Thhalv10001981	0.858974	-0.00436535	0.422005	-0.00667408	1.06946	0.92866	0.297898	0.480724	-0.0263509
cluster1_green_Ath	AT2G21480	Carubv10024975	CARHR112400	Thhalv10000042	1.95226	-0.0578883	0.432595	0.312789	0.348197	0.469096	0.808567	-0.0173415	-0.178169
cluster1_green_Ath	AT2G25940	Carubv10025418	CARHR286470	Thhalv10001970	0.257274	1.391	0.0333858	0.287197	0.952571	0.134192	-0.0112871	0.121917	-0.0530632
cluster1_green_Ath	AT2G26240	Carubv10024361	CARHR115050	Thhalv10002166	0.184966	0.931328	0.930215	1.11424	1.30337	1.5581	-0.233178	0.810271	0.100823
cluster1_green_Ath	AT2G27150	Carubv10022516	CARHR119530	Thhalv10001885	1.86968	1.75828	1.14866	1.02417	1.23192	1.54464	-0.936441	-0.456262	-0.301361
cluster1_green_Ath	AT2G27260	Carubv10010132	CARHR119770	Thhalv10002076	-0.0335463	0.645111	0.978719	0.9453	1.07064	1.06267	0.519305	0.275321	-0.718547
cluster1_green_Ath	AT2G28510	Carubv10023783	CARHR121520	Thhalv10017032	0.342968	-0.0750171	0.456966	0.593113	-0.0865233	1.07791	0.685948	0.00702887	-0.00203902
cluster1_green_Ath	AT2G30400	Carubv10023651	CARHR289390	Thhalv10017964	1.45881	1.83963	1.94658	0.758971	1.12542	1.89973	-0.313228	0.0770419	-1.51269
cluster1_green_Ath	AT2G30740	Carubv10023490	CARHR124230	Thhalv10016840	0.356221	0.933916	0.477033	0.673882	1.28074	0.836683	0.329738	-0.0421722	0.451868
cluster1_green_Ath	AT2G30780	Carubv10023194	CARHR124250	Thhalv10016605	0.510972	1.151	0.436586	0.443398	0.524359	0.230897	0.217799	0.135137	-0.286905
cluster1_green_Ath	AT2G30990	Carubv10022845	CARHR124530	Thhalv10016438	1.40662	1.79186	1.47363	0.828204	1.59542	1.70256	0.319458	0.0889944	-0.0899068
cluster1_green_Ath	AT2G31570	Carubv10023920	CARHR125200	Thhalv10017319	0.205611	-0.0890299	0.190722	0.330496	1.04439	0.381501	0.236769	0.48371	0.391608
cluster1_green_Ath	AT2G33585	Carubv10024780	CARHR127610	Thhalv10017474	0.11337	0.277825	0.574911	0.927367	1.03891	1.10659	0.598558	0.0425156	0.788145
cluster1_green_Ath	AT2G33700	Carubv10023439	CARHR127700	Thhalv10016757	0.803936	0.781764	0.827259	0.688837	1.18385	1.15492	0.65479	0.409353	0.468315
cluster1_green_Ath	AT2G34140	Carubv10024615	CARHR128230	Thhalv10017316	0.704824	0.731146	0.833742	0.985761	0.966362	1.85967	0.136147	0.357646	-2.29102
cluster1_green_Ath	AT2G34360	Carubv10023107	CARHR128450	Thhalv10016570	0.561975	0.665286	1.56201	0.208848	1.65992	-0.117509	-1.15533	-0.406181	-0.234416
cluster1_green_Ath	AT2G35290	Carubv10024338	CARHR129440	Thhalv10017432	0.112556	-0.227133	0.713887	1.61392	0.594429	1.24778	0.305756	1.51401	-0.239757
cluster1_green_Ath	AT2G36090	Carubv10025196	CARHR130340	Thhalv10016952	-0.750225	0.299883	0.771203	0.484358	0.299432	1.85469	-0.355987	0.469652	0.448292
cluster1_green_Ath	AT2G36580	Carubv10022991	CARHR130870	Thhalv10016506	1.17724	1.26637	0.609239	0.621031	0.933733	1.43115	0.261053	0.458525	0.680827
cluster1_green_Ath	AT2G37590	Carubv10023657	CARHR131980	Thhalv10016930	0.3472	1.09855	0.749125	1.19731	1.15986	1.9525	0.328332	0.380276	-0.263645
cluster1_green_Ath	AT2G38000	Carubv10025680	CARHR132560	Thhalv10016725	0.37295	0.814354	0.505727	0.478745	1.03599	0.266586	0.520184	0.614416	0.459844
cluster1_green_Ath	AT2G38960	Carubv10023112	CARHR133700	Thhalv10016606	1.00149	1.21944	0.815375	0.436005	0.848947	0.546172	0.335907	-0.0248042	0.62449
cluster1_green_Ath	AT2G40020	Carubv10023785	CARHR134980	Thhalv10017194	-0.513061	1.16986	0.541305	0.0292895	1.24782	0.325565	0.287449	-0.533038	-0.41345
cluster1_green_Ath	AT2G41350	Carubv10025670	CARHR136470	Thhalv10017004	0.821498	0.867762	1.33242	-0.00897172	1.8739	0.370267	-0.0274793	0.0491204	0.200038
cluster1_green_Ath	AT2G41450	Carubv10022953	CARHR136560	Thhalv10016390	0.329575	1.57693	1.45473	-0.192767	1.94729	2.24668	-0.349749	1.54541	0.12388
cluster1_green_Ath	AT2G42760	Carubv10023852	CARHR137840	Thhalv10017132	0.731563	0.481316	0.963266	0.345122	1.74829	0.957888	-0.26671	0.526068	1.12294
cluster1_green_Ath	AT2G42950	Carubv10023051	CARHR138010	Thhalv10016539	0.356479	1.26809	1.19902	0.501337	1.08271	0.88873	0.177953	0.0642693	-0.398043
cluster1_green_Ath	AT2G44130	Carubv10025145	CARHR139310	Thhalv10001782	0.1881	0.316795	0.000928	1.44844	0.573312	0.227949	-1.18756	-0.37141	0.0950842
cluster1_green_Ath	AT2G44360	Carubv10024293	CARHR139520	Thhalv10001676	0.482118	0.468179	0.999993	1.13962	1.48008	1.27362	0.408298	0.103705	1.1804
cluster1_green_Ath	AT2G44730	Carubv10025047	CARHR139940	Thhalv10001488	0.295742	0.212452	0.654886	0.684782	1.04046	0.682793	0.747888	0.464914	0.356653
cluster1_green_Ath	AT2G46080	Carubv10023538	CARHR141340	Thhalv10001526	0.708127	0.85014	1.00958	0.508747	1.28351	1.13671	0.631681	0.409583	0.119441
cluster1_green_Ath	AT2G46170	Carubv10023902	CARHR141450	Thhalv10001599	0.75869	0.769909	1.03075	0.895902	1.00955	1.33646	0.865065	-0.125198	0.438844
cluster1_green_Ath	AT2G46210	Carubv10023205	CARHR141480	Thhalv10001443	0.761919	0.557734	0.716902	0.759553	1.10645	0.856689	-0.509414	-0.620578	0.776537
cluster1_green_Ath	AT2G46735	Carubv10025599	CARHR142080	Thhalv10001667	0.312123	0.0937101	0.681068	0.573523	0.922243	0.769006	1.01757	-0.0173415	-0.00105278
cluster1_green_Ath	AT2G47680	Carubv10022564	CARHR143070	Thhalv10001290	1.69678	1.23375	1.03367	0.845502	2.00355	1.39559	-0.130101	0.181053	-0.436854
cluster1_green_Ath	AT2G47750	Carubv10022875	CARHR143120	Thhalv10001368	-0.646683	1.57688	1.56065	-0.386964	5.06937	2.5492	-0.72964	-1.44052	-0.73166
cluster1_green_Ath	AT3G01080	Carubv10013623	CARHR075990	Thhalv10020676	0.48529	0.994171	-0.0144588	1.73514	1.65182	1.08438	0.18961	0.15835	1.19612
cluster1_green_Ath	AT3G01610	Carubv10012989	CARHR075310	Thhalv10010134	0.665915	1.18796	0.481729	0.390522	0.713363	0.960701	0.467055	-0.40689	-0.0708886
cluster1_green_Ath	AT3G01640	Carubv10013944	CARHR075280	Thhalv10020980	0.905402	1.12021	1.10644	1.17947	1.52091	1.38511	1.0226	0.268132	-0.170173
cluster1_green_Ath	AT3G02150	Carubv10014042	CARHR076120	Thhalv10021021	1.16762	0.891207	1.12646	1.41444	0.945152	1.39915	-0.546738	0.186956	-0.136997
cluster1_green_Ath	AT3G03520	Carubv10013454	CARHR077530	Thhalv10020514	0.197938	3.69945	0.101105	-0.451287	0.080007	0.080068	0.654815	0.124232	0.162444
cluster1_green_Ath	AT3G03530	Carubv10013415	CARHR077540	Thhalv10020472	0.620619	2.37984	0.440467	-0.32581	0.911984	1.19138	0.811673	0.1758	0.293132
cluster1_green_Ath	AT3G03860	Carubv10014268	CARHR077980	Thhalv10021238	0.26407	0.172593	0.321359	0.579804	1.08886	0.749685	0.0776605	0.0721086	0.20337
cluster1_green_Ath	AT3G04570	Carubv10015351	CARHR078750	Thhalv10021166	-0.204861	0.228886	0.487158	0.530598	0.573946	1.07316	-0.128265	0.0568061	0.28017
cluster1_green_Ath	AT3G05380	Carubv10012879	CARHR079720	Thhalv10019971	0.851531	1.06468	0.379839	0.00928444	0.66107	0.614819	-0.465354	0.308403	-0.199167
cluster1_green_Ath	AT3G05450	Carubv10016115	CARHR080560	Thhalv10021511	-0.964535	-0.0570703	0.432595	2.68575	0.348197	0.501254	0.280246	-0.23159	-0.31087
cluster1_green_Ath	AT3G05830	Carubv10014130	CARHR080290	Thhalv10021934	0.621993	1.10667	0.667581	0.379308	0.77476	0.599403	-0.373775	0.100703	0.106666
cluster1_green_Ath	AT3G06890	Carubv10014923	CARHR081510	Thhalv10021931	-0.611243	0.656987	0.3684	0.842484	0.361206	1.13162	-1.04201	-0.195843	-0.520798
cluster1_green_Ath	AT3G07320	Carubv10013655	CARHR081970	Thhalv10020660	0.537876	1.57841	0.248344	0.610497	0.670961	0.866684	0.0983527	-0.0713396	-0.470094
cluster1_green_Ath	AT3G10400	Carubv10016463	CARHR084880	Thhalv10021363	0.526334	0.506979	0.649185	0.838333	0.82341	1.2455	-0.351244	-0.0173415	-0.244927
cluster1_green_Ath	AT3G10950	Carubv10015000	CARHR085530	Thhalv10021837	3.74979	-0.0586514	0.862797	-0.326157	0.348197	0.469096	-0.0396228	-0.498136	-0.287735
cluster1_green_Ath	AT3G11260	Carubv10016169	CARHR085820	Thhalv10022017	-0.346189	0.350546	1.40205	0.695094	0.378102	1.26412	0.265087	0.0165147	-1.40828
cluster1_green_Ath	AT3G12030	Carubv10016008	CARHR086590	Thhalv10022159	0.693158	0.95592	1.10641	0.929117	1.34177	1.28122	-0.2634	-0.232256	0.0929066
cluster1_green_Ath	AT3G12200	Carubv10013336	CARHR086770	Thhalv10020364	0.92045	1.56308	1.18898	-0.0962323	1.47157	1.18287	-0.219238	0.359435	0.664568
cluster1_green_Ath	AT3G13110	Carubv10015528	CARHR087700	Thhalv10020893	0.835603	0.237012	0.884555	0.564595	1.29379	1.29181	-0.219108	1.13836	-0.521533
cluster1_green_Ath	AT3G14200	Carubv10014542	CARHR089080	Thhalv10021462	0.246042	0.601094	1.04361	0.209754	-0.0550255	0.877683	-0.378554	0.0566201	0.966566
cluster1_green_Ath	AT3G14395	Carubv10014820	CARHR089390	Thhalv10022065	0.885169	-0.688644	0.659139	0.107801	1.8665	1.03598	-0.422371	-0.290246	-2.77853
cluster1_green_Ath	AT3G15530	Carubv10014314	CARHR090590	Thhalv10021257	0.865639	0.75581	0.597941	1.57433	1.07128	1.60823	0.176983	1.27509	0.301256
cluster1_green_Ath	AT3G16300	Carubv10015319	CARHR091510	Thhalv10021518	0.199068	0.625365	0.585962	1.00217	1.19868	0.845727	0.328731	-0.469666	-1.37534
cluster1_green_Ath	AT3G16350	Carubv10013924	CARHR091560	Thhalv10020915	0.303196	0.346564	0.225193	0.496971	1.09129	0.657404	0.339733	-0.265576	0.176471
cluster1_green_Ath	AT3G16940	Carubv10012963	CARHR092210	Thhalv10020047	0.829781	1.62397	0.744417	-0.354615	1.074	0.780589	-0.0632233	0.335819	1.2586
cluster1_green_Ath	AT3G16990	Carubv10014589	CARHR092240	Thhalv10021446	0.297787	0.616497	0.888216	0.992759	0.907531	1.04183	1.29669	0.0455475	-0.391868
cluster1_green_Ath	AT3G17390	Carubv10013777	CARHR092710	Thhalv10020887	1.05087	1.10501	0.986653	1.02052	1.06536	1.28499	-0.506973	0.441011	0.924376
cluster1_green_Ath	AT3G17770	Carubv10013295	CARHR093110	Thhalv10020350	0.58662	1.00863	0.498715	0.44366	1.2372	1.4826	0.119063	-0.174754	0.442899
cluster1_green_Ath	AT3G18010	Carubv10013929	CARHR093320	Thhalv10022042	0.248267	1.31911	0.995381	0.213524	1.45177	0.996792	-0.607833	-2.43909	-1.17391
cluster1_green_Ath	AT3G18440	Carubv10013270	CARHR093800	Thhalv10020343	0.915312	1.64534	0.954368	0.221485	1.13873	0.70624	0.54653	0.257787	0.00774207
cluster1_green_Ath	AT3G19190	Carubv10012796	CARHR094600	Thhalv10019879	1.08584	1.42582	0.240526	0.426356	0.749866	0.699401	0.0864709	0.300686	0.364148
cluster1_green_Ath	AT3G19210	Carubv10012922	CARHR094620	Thhalv10020013	0.798145	1.62435	0.79558	0.0598546	1.10555	1.30512	0.457714	0.0198768	-0.197707
cluster1_green_Ath	AT3G19553	Carubv10013593	CARHR094980	Thhalv10020631	1.03019	1.41162	1.49162	1.35462	1.88311	0.962784	-1.0831	0.333989	-0.0169423
cluster1_green_Ath	AT3G20040	Carubv10013513	CARHR095570	Thhalv10020562	0.97944	1.03745	0.852141	0.130207	1.36208	0.695089	0.680114	0.0316827	-0.686292
cluster1_green_Ath	AT3G21220	Carubv10015608	CARHR097120	Thhalv10021025	0.982806	1.05319	1.11302	1.23991	0.90349	1.48707	-0.202712	0.812464	0.965185
cluster1_green_Ath	AT3G21295	Carubv10013137	CARHR097200	Thhalv10020246	0.918201	1.85773	0.614897	0.276853	1.30688	1.17225	0.547984	-0.124879	0.926697
cluster1_green_Ath	AT3G22930	Carubv10014817	CARHR098870	Thhalv10021692	0.4967	0.477488	1.27679	1.02038	0.981897	1.93261	0.349093	0.750606	0.782819
cluster1_green_Ath	AT3G23440	Carubv10014951	CARHR099400	Thhalv10022231	0.398621	-0.161347	0.599262	1.22304	0.0625273	1.2807	0.0737469	1.10116	0.318011
cluster1_green_Ath	AT3G24050	Carubv10014365	CARHR100180	Thhalv10002609	0.170909	0.372222	0.744175	0.58923	0.825481	1.05174	1.01947	0.35173	-0.0171977
cluster1_green_Ath	AT3G24130	Carubv10003190	CARHR100070	Thhalv10002927	-0.0509235	-0.0578883	1.72869	0.84111	0.348197	-0.0592245	0.280246	-0.574213	0.338165
cluster1_green_Ath	AT3G24503	Carubv10013510	CARHR100620	Thhalv10002492	1.39865	0.470032	0.626982	0.624622	0.678157	0.854178	1.07528	-0.161625	-0.227329
cluster1_green_Ath	AT3G25210	Carubv10013818	CARHR101560	Thhalv10002564	0.590823	1.00546	0.00867706	0.863259	0.8548	1.18665	-0.129065	-0.346239	0.447785
cluster1_green_Ath	AT3G26420	Carubv10017941	CARHR147440	Thhalv10004793	-2.76474	0.112604	0.992074	1.02736	0.761965	1.09109	-0.202639	0.0233522	-0.0617676
cluster1_green_Ath	AT3G26840	Carubv10016764	CARHR147910	Thhalv10003736	1.68167	0.277874	0.0555648	0.140015	0.349793	0.749323	-0.126037	0.676938	0.47287
cluster1_green_Ath	AT3G29010	Carubv10019399	CARHR152100	Thhalv10005292	0.301094	0.455308	0.424703	0.886215	1.16462	0.549415	0.756151	-0.014506	0.544282
cluster1_green_Ath	AT3G30380	Carubv10019591	CARHR153470	Thhalv10004404	0.254451	0.757468	0.894926	0.408645	1.29865	1.04943	0.205401	0.118209	-0.429649
cluster1_green_Ath	AT3G43270	Carubv10017009	CARHR054440	Thhalv10002482	0.834315	0.856726	0.351619	0.670047	0.702745	0.505769	1.36596	-0.330978	-0.595549
cluster1_green_Ath	AT3G44730	Carubv10007986	CARHR151450	Thhalv10002379	1.10942	2.42739	-0.128201	0.920844	1.12264	2.12266	0.035003	-0.113586	-0.1405
cluster1_green_Ath	AT3G44735	Carubv10018708	CARHR151430	Thhalv10002908	0.826637	0.196326	0.654934	1.57456	0.313874	0.616582	-1.00486	-0.215762	-0.765233
cluster1_green_Ath	AT3G45650	Carubv10016943	CARHR149980	Thhalv10002464	1.25308	0.749563	0.890304	0.417672	0.636464	1.13531	-1.05027	-1.26481	-0.590948
cluster1_green_Ath	AT3G46720	Carubv10017253	CARHR154970	Thhalv10002978	-0.231724	1.41707	0.292702	-0.734099	0.495808	1.64772	-1.11466	0.574959	-0.881028
cluster1_green_Ath	AT3G47830	Carubv10017731	CARHR156520	Thhalv10010580	0.652278	0.554984	0.88268	0.751499	1.28569	0.605267	-0.218086	-0.178577	0.318458
cluster1_green_Ath	AT3G48570	Carubv10018354	CARHR157370	Thhalv10010887	0.340249	0.609096	0.787604	1.15105	1.05658	1.49753	0.0709863	0.146053	0.386022
cluster1_green_Ath	AT3G50850	Carubv10019248	CARHR160400	Thhalv10010630	0.667343	0.786916	1.12244	1.27824	1.1697	1.55346	0.221855	0.768972	-0.39521
cluster1_green_Ath	AT3G52360	Carubv10018794	CARHR162120	Thhalv10010863	-0.194273	0.291619	0.248614	0.624678	1.32834	0.759558	0.374135	0.421857	0.814633
cluster1_green_Ath	AT3G52540	Carubv10018933	CARHR162320	Thhalv10011014	0.226811	0.611713	-0.110844	1.33112	1.40714	1.10047	-0.65308	-0.103709	-0.540614
cluster1_green_Ath	AT3G52561	Carubv10018867	CARHR162350	Thhalv10011097	3.15537	0.677304	2.59095	0.672116	-0.0226191	2.07914	-0.522657	-1.91612	1.15799
cluster1_green_Ath	AT3G53000	Carubv10017732	CARHR162890	Thhalv10010582	0.683478	1.06529	1.03058	0.675418	1.82204	1.05921	0.101843	0.58242	0.468034
cluster1_green_Ath	AT3G53990	Carubv10018150	CARHR163890	Thhalv10010778	0.785413	0.843609	1.07303	1.27265	1.2529	1.48116	-0.167394	0.117367	0.537468
cluster1_green_Ath	AT3G54110	Carubv10017704	CARHR163990	Thhalv10010579	0.602479	0.502798	0.777031	0.522113	0.954693	0.78028	1.03869	-0.0652135	0.234254
cluster1_green_Ath	AT3G56030	Carubv10018709	CARHR166100	Thhalv10006093	0.703856	0.476244	0.904101	1.1847	0.949098	1.19218	0.275276	-0.461611	-0.411611
cluster1_green_Ath	AT3G56060	Carubv10019598	CARHR166130	Thhalv10005870	0.877207	0.592501	0.311822	0.39848	1.67155	0.485766	1.24873	0.0429592	-0.613272
cluster1_green_Ath	AT3G57090	Carubv10018130	CARHR167290	Thhalv10006275	0.234555	0.527327	0.845693	0.673792	0.967934	1.02375	-0.00262104	0.141427	0.255133
cluster1_green_Ath	AT3G57880	Carubv10016719	CARHR168190	Thhalv10005798	0.733399	1.24181	0.110631	0.314686	0.40092	1.0698	-0.0141226	-0.0336748	-0.0985823
cluster1_green_Ath	AT3G59010	Carubv10017004	CARHR169420	Thhalv10005885	1.27591	0.7681	0.78442	1.41001	0.752234	1.48947	-0.728343	-1.44739	0.318558
cluster1_green_Ath	AT3G59220	Carubv10017760	CARHR169610	Thhalv10006135	-0.0885727	0.596302	1.4951	-0.0268482	0.644611	0.985538	-1.10757	-1.55929	0.734789
cluster1_green_Ath	AT3G59850	Carubv10017416	CARHR170200	Thhalv10006416	0.136155	0.148213	0.681666	0.382135	1.56752	1.33016	0.406827	0.0583262	0.0983086
cluster1_green_Ath	AT3G59900	Carubv10018945	CARHR170230	Thhalv10006308	0.939124	0.56189	0.924368	1.2268	0.825624	1.38712	-0.143898	1.03624	0.146625
cluster1_green_Ath	AT3G60490	Carubv10017799	CARHR170870	Thhalv10006200	0.162912	-0.500094	0.402223	0.56115	0.878837	1.06188	0.521982	-0.218207	-0.149754
cluster1_green_Ath	AT3G61160	Carubv10019312	CARHR171450	Thhalv10005969	0.840003	0.542339	0.264354	0.0902373	1.49371	-0.0160305	-0.764019	0.21697	1.2557
cluster1_green_Ath	AT3G62990	Carubv10018216	CARHR173280	Thhalv10006446	0.362056	2.20216	-0.0205812	0.582931	2.57057	0.788141	0.470034	-0.235987	0.744535
cluster1_green_Ath	AT3G63240	Carubv10016969	CARHR291710	Thhalv10005867	0.109736	1.75834	0.665387	-0.541421	1.16533	1.29821	-0.675213	-0.387306	-0.551216
cluster1_green_Ath	AT4G01710	Carubv10002926	CARHR248040	Thhalv10005116	0.0523269	0.26312	0.527268	0.463241	1.01118	0.827045	-0.285973	-0.447608	-0.0545274
cluster1_green_Ath	AT4G02360	Carubv10002605	CARHR250550	Thhalv10029529	-0.279883	1.8988	1.66824	1.74639	0.455609	0.839953	0.231523	-1.23387	0.655089
cluster1_green_Ath	AT4G03430	Carubv10025803	CARHR251830	Thhalv10028386	1.23939	0.978828	0.594258	0.564764	0.716515	1.30056	0.251098	0.43424	0.0406946
cluster1_green_Ath	AT4G04800	Carubv10003532	CARHR252730	Thhalv10029054	0.450644	0.744439	0.853545	0.588561	0.401228	1.52025	0.44957	0.558005	-0.192554
cluster1_green_Ath	AT4G05120	Carubv10001055	CARHR252450	Thhalv10028692	1.18708	0.892028	2.45042	1.22451	1.11155	0.893339	0.556978	-0.538697	0.842058
cluster1_green_Ath	AT4G05170	Carubv10003683	CARHR252380	Thhalv10029319	0.581151	0.297346	0.760367	-0.122175	0.948097	1.25995	-2.56618	1.10325	0.516778
cluster1_green_Ath	AT4G08160	Carubv10000293	CARHR259270	Thhalv10028466	1.62178	0.817028	0.0198443	0.714969	0.549898	0.441529	0.78852	0.353796	-0.304307
cluster1_green_Ath	AT4G10170	Carubv10001766	CARHR256650	Thhalv10028894	0.08291	0.531105	0.508733	0.811103	0.700121	0.82423	-0.585489	0.616878	1.15958
cluster1_green_Ath	AT4G10380	Carubv10001558	CARHR256270	Thhalv10028842	0.136166	0.696864	1.20676	0.734036	0.677405	1.27268	0.597859	0.281481	-0.0536707
cluster1_green_Ath	AT4G11680	Carubv10001135	CARHR254690	Thhalv10028703	0.0918618	1.06172	0.891453	0.359988	1.26998	1.23886	0.25313	-0.236632	-0.234895
cluster1_green_Ath	AT4G12000	Carubv10001502	CARHR254280	Thhalv10028910	0.0679885	-0.213808	0.295527	0.578572	0.460489	1.00764	-0.765889	0.268547	-0.819491
cluster1_green_Ath	AT4G12010	Carubv10002693	CARHR254250	Thhalv10028373	1.4654	1.79639	0.926188	0.370147	1.28198	1.30841	0.464058	0.441667	-0.28652
cluster1_green_Ath	AT4G12020	Carubv10000171	CARHR254260	Thhalv10028393	0.967339	1.00141	-0.744163	0.962424	0.503082	0.66153	0.492563	0.954492	-0.225004
cluster1_green_Ath	AT4G12790	Carubv10005478	CARHR218080	Thhalv10025507	0.582947	0.830044	1.14142	0.568643	1.32905	1.18617	0.321731	0.0288305	0.460946
cluster1_green_Ath	AT4G13040	Carubv10005663	CARHR218370	Thhalv10026242	0.345094	1.14184	0.714108	0.516183	0.804611	0.629359	0.344482	0.677885	0.492597
cluster1_green_Ath	AT4G13830	Carubv10005745	CARHR219740	Thhalv10026283	-0.200541	0.938369	0.798024	0.64958	1.40377	0.0774886	0.290471	-0.666896	0.0215975
cluster1_green_Ath	AT4G15140	Carubv10007387	CARHR221880	Thhalv10027487	0.915579	0.976835	1.09836	1.4914	1.25459	1.78969	-0.254493	-0.52327	-0.875525
cluster1_green_Ath	AT4G15360	Carubv10013479	CARHR095690	Thhalv10020513	1.35907	0.378424	0.117781	0.912275	0.182721	2.76384	-0.850835	-0.829333	-0.540782
cluster1_green_Ath	AT4G16350	Carubv10005675	CARHR222720	Thhalv10027149	0.36587	0.821577	1.27424	1.13326	1.12451	1.2058	0.602825	0.0797324	-0.0150349
cluster1_green_Ath	AT4G16760	Carubv10004312	CARHR223330	Thhalv10024621	0.791237	0.751189	0.8531	0.274475	1.21884	0.570442	-0.297404	0.372017	-0.0116444
cluster1_green_Ath	AT4G17695	Carubv10005261	CARHR224420	Thhalv10026166	1.27879	1.05905	0.742336	0.668341	0.641322	0.0900761	-1.15368	0.161397	0.12216
cluster1_green_Ath	AT4G18630	Carubv10004709	CARHR225490	Thhalv10025107	0.411081	0.601959	1.11439	0.399686	0.547044	0.737331	0.251187	1.42972	-0.537934
cluster1_green_Ath	AT4G19140	Carubv10005338	CARHR226010	Thhalv10025843	1.02194	0.975129	1.36424	1.03498	1.43431	1.46179	0.195619	0.363734	0.0234595
cluster1_green_Ath	AT4G19980	Carubv10006027	CARHR226750	Thhalv10026564	-0.375607	0.396147	1.14561	0.198979	1.49646	1.33044	0.410756	-0.636398	-0.296968
cluster1_green_Ath	AT4G19990	Carubv10004190	CARHR226770	Thhalv10024475	0.930711	1.29425	0.811067	-0.0849304	0.577309	0.960194	-0.0650637	-0.0980226	-0.240829
cluster1_green_Ath	AT4G20300	Carubv10005146	CARHR227120	Thhalv10025632	0.482575	0.595708	0.676907	0.120663	1.04744	0.882713	0.0064528	-0.352269	0.207975
cluster1_green_Ath	AT4G20880	Carubv10004874	CARHR227440	Thhalv10025304	0.107573	1.20195	0.806831	0.751566	1.48484	1.25581	-0.100334	0.448875	-0.762496
cluster1_green_Ath	AT4G20970	Carubv10005784	CARHR227520	Thhalv10026322	2.5369	1.00077	0.889703	-0.333751	2.91148	1.02311	-2.14795	0.153524	-0.237742
cluster1_green_Ath	AT4G23885	Carubv10007685	CARHR231280	Thhalv10026982	0.154007	0.353646	0.676358	0.798055	0.609103	0.969513	1.13563	0.080487	0.0918662
cluster1_green_Ath	AT4G24015	Carubv10005892	CARHR231420	Thhalv10026391	0.818634	1.19806	1.407	0.657187	1.10978	1.20593	-0.171372	0.105736	-0.785555
cluster1_green_Ath	AT4G24430	Carubv10007831	CARHR231820	Thhalv10024647	2.81123	0.374159	0.0305924	0.289918	0.174123	-0.955588	0.0572057	0.0746433	0.112767
cluster1_green_Ath	AT4G24730	Carubv10005301	CARHR232100	Thhalv10025788	0.409862	0.467846	0.777354	0.806827	0.809801	1.222	0.329858	0.290142	0.567268
cluster1_green_Ath	AT4G24970	Carubv10006721	CARHR232370	Thhalv10024553	0.935671	1.37035	1.01209	0.0557342	1.43019	0.858533	-0.816626	-0.862035	-0.453032
cluster1_green_Ath	AT4G25410	Carubv10006739	CARHR232820	Thhalv10027549	0.369408	1.94136	0.446264	-0.28154	0.459516	0.99004	0.425621	0.208046	0.46785
cluster1_green_Ath	AT4G26140	Carubv10007108	CARHR233660	Thhalv10024511	0.300069	1.2469	0.094234	0.563271	1.21409	0.282985	-0.716907	-0.0298315	0.306779
cluster1_green_Ath	AT4G26170	Carubv10004909	CARHR233700	Thhalv10025245	-0.0120868	1.68413	0.907947	-1.35947	2.22683	0.613275	0.466878	-1.1233	1.01131
cluster1_green_Ath	AT4G26810	Carubv10006096	CARHR234430	Thhalv10026656	0.2602	-0.0643348	0.326241	0.921783	1.03862	1.25273	0.104928	-0.179416	0.15127
cluster1_green_Ath	AT4G26990	Carubv10007224	CARHR234600	Thhalv10025144	0.531619	1.05115	0.428282	0.361588	1.05886	0.7672	0.114448	-0.0516185	-0.101243
cluster1_green_Ath	AT4G27460	Carubv10005000	CARHR235140	Thhalv10026939	0.990586	1.97383	1.00278	1.1793	2.09297	1.34538	-0.112734	-0.580537	-0.698748
cluster1_green_Ath	AT4G28290	Carubv10006154	CARHR236000	Thhalv10026705	0.246133	0.313586	0.604584	1.31286	1.68695	1.03188	-1.15891	-1.15836	1.42703
cluster1_green_Ath	AT4G28800	Carubv10007459	CARHR236600	Thhalv10027582	-0.268137	-0.0570703	1.83436	1.92775	0.797493	2.42723	-3.58208	2.10572	0.481835
cluster1_green_Ath	AT4G29220	Carubv10006594	CARHR236970	Thhalv10024824	0.543053	1.02503	0.488692	-0.0778878	1.00487	0.831992	-0.515975	0.0258047	-0.262487
cluster1_green_Ath	AT4G30240	Carubv10005233	CARHR238150	Thhalv10025801	0.833434	0.901756	0.98344	0.679329	1.28116	1.34785	0.333283	0.882127	-0.462638
cluster1_green_Ath	AT4G30270	Carubv10005183	CARHR238180	Thhalv10025941	1.44338	1.24083	1.14994	1.26707	1.80098	1.33588	-0.557651	0.244631	0.374867
cluster1_green_Ath	AT4G31470	Carubv10006338	CARHR239360	Thhalv10026331	0.776359	0.16714	0.986562	0.60941	1.40429	1.61026	-2.09888	-1.26361	-3.55222
cluster1_green_Ath	AT4G32800	Carubv10006567	CARHR240790	Thhalv10026204	1.8113	0.332267	1.44889	0.0811677	0.687942	0.963808	0.947331	-0.0191003	-0.45247
cluster1_green_Ath	AT4G33160	Carubv10004913	CARHR241190	Thhalv10025320	0.206445	1.39529	0.338294	0.837478	1.0546	0.853799	0.564616	0.30276	-0.299746
cluster1_green_Ath	AT4G33180	Carubv10005254	CARHR241210	Thhalv10025802	0.61549	0.736461	1.15832	1.10528	1.01748	1.52465	0.035937	0.132652	-0.136092
cluster1_green_Ath	AT4G34310	Carubv10004011	CARHR242470	Thhalv10024246	0.776315	1.08109	0.0254827	-0.151653	0.439994	0.240192	0.434056	0.155802	0.176793
cluster1_green_Ath	AT4G34400	Carubv10006245	CARHR242370	Thhalv10028696	1.01732	3.23096	0.27044	0.0534843	1.54556	1.802	-1.53461	0.533138	0.29337
cluster1_green_Ath	AT4G36010	Carubv10005355	CARHR244410	Thhalv10025825	0.956694	0.092051	1.10881	0.701034	0.53827	1.80947	0.248527	0.797714	0.23795
cluster1_green_Ath	AT4G36110	Carubv10006094	CARHR244510	Thhalv10026647	1.08273	0.0829577	-0.109185	1.26955	0.922258	0.959684	-0.929025	0.095989	-0.988162
cluster1_green_Ath	AT4G36220	Carubv10004440	CARHR244620	Thhalv10024928	0.681532	0.771155	0.495476	1.04098	0.43379	0.631198	0.572052	0.246736	0.622045
cluster1_green_Ath	AT4G36640	Carubv10007257	CARHR244980	Thhalv10025882	1.12393	1.19774	1.14936	0.586426	1.3364	1.51126	-0.00261282	0.614249	0.127259
cluster1_green_Ath	AT4G37520	Carubv10005222	CARHR245920	Thhalv10025695	1.01423	0.509291	0.711934	0.468005	0.898091	0.798754	-0.25153	1.44301	0.717743
cluster1_green_Ath	AT4G37560	Carubv10007029	CARHR245960	Thhalv10025178	-0.0284885	0.448584	-0.397281	-0.422903	2.15738	0.596769	-1.05639	-0.998937	0.782514
cluster1_green_Ath	AT4G38530	Carubv10007023	CARHR294260	Thhalv10024782	0.5407	1.32482	0.814158	0.432997	0.963758	1.65277	0.0916795	0.0902235	0.663539
cluster1_green_Ath	AT4G39320	Carubv10005843	CARHR247390	Thhalv10027542	0.939853	2.79568	1.62649	0.46417	1.97224	1.42242	-0.37564	0.720132	-1.06554
cluster1_green_Ath	AT4G39820	Carubv10004446	CARHR246880	Thhalv10025314	0.873358	0.975742	1.1467	1.17189	1.48547	1.50353	-0.0633346	-0.00961017	0.620337
cluster1_green_Ath	AT4G39910	Carubv10005074	CARHR246790	Thhalv10025506	0.844949	1.28941	1.33685	0.943989	1.71153	1.07518	0.540131	0.488275	0.477951
cluster1_green_Ath	AT5G01040	Carubv10000548	CARHR211370	Thhalv10015329	0.860157	1.31091	0.300421	0.605298	1.18914	1.02636	0.581228	0.53507	-0.308975
cluster1_green_Ath	AT5G01720	Carubv10000400	CARHR212080	Thhalv10012898	0.951454	1.058	0.661519	0.532097	0.384078	0.42877	0.649126	0.785282	-0.269614
cluster1_green_Ath	AT5G01730	Carubv10000074	CARHR212090	Thhalv10012471	1.30515	1.49336	1.21559	0.151756	1.27568	0.856691	0.235295	-0.0869503	0.378622
cluster1_green_Ath	AT5G03110	Carubv10001582	CARHR210240	Thhalv10014228	0.501534	1.05587	0.81913	0.890594	1.54456	1.36065	0.30242	-0.0753632	-0.343509
cluster1_green_Ath	AT5G04390	Carubv10003458	CARHR208920	Thhalv10013864	-0.10685	0.794957	0.689879	-0.347294	-0.29237	1.58187	-0.491206	-0.955356	0.10516
cluster1_green_Ath	AT5G05090	Carubv10003130	CARHR208180	Thhalv10014387	0.234448	0.784697	0.339013	1.14316	0.799455	0.645316	-0.603546	-0.220517	0.111937
cluster1_green_Ath	AT5G05100	Carubv10001459	CARHR208170	Thhalv10014404	0.38673	0.878654	0.605035	0.825543	1.17383	0.781291	0.714753	0.530115	0.202172
cluster1_green_Ath	AT5G05570	Carubv10000088	CARHR207690	Thhalv10012508	0.802479	1.2267	0.326668	-0.195347	0.549675	0.218709	0.740572	0.539821	0.0924969
cluster1_green_Ath	AT5G07460	Carubv10001919	CARHR205680	Thhalv10014609	1.18041	0.0445374	0.789704	0.455065	1.10434	0.700332	-0.68926	-0.208003	-0.347506
cluster1_green_Ath	AT5G07730	Carubv10001808	CARHR205420	Thhalv10014431	-0.0351941	0.843033	1.30266	0.8051	1.1306	1.02846	-0.0286727	0.0992264	-0.27982
cluster1_green_Ath	AT5G07820	Carubv10000566	CARHR205360	Thhalv10013233	1.66311	1.33376	0.624496	0.441516	0.842658	0.749577	0.710497	-0.273751	0.605714
cluster1_green_Ath	AT5G08139	Carubv10001041	CARHR205050	Thhalv10013909	0.931134	1.09213	1.32939	1.14133	1.83877	1.67579	0.558381	0.12539	0.500743
cluster1_green_Ath	AT5G08335	Carubv10002010	CARHR204740	Thhalv10014725	0.53316	0.744847	1.47485	1.13296	1.90519	1.53151	-0.231366	0.683231	0.181422
cluster1_green_Ath	AT5G09970	Carubv10000671	CARHR203360	Thhalv10013216	0.443317	0.540757	0.129976	1.19571	0.455925	0.0876051	-0.0505284	0.397247	-0.26452
cluster1_green_Ath	AT5G10830	Carubv10003164	CARHR202450	Thhalv10014426	0.751372	1.14574	1.11796	1.16991	1.55287	1.738	0.539058	-0.0173415	0.376458
cluster1_green_Ath	AT5G12390	Carubv10002115	CARHR200720	Thhalv10014835	0.503024	0.422652	0.863314	0.862169	1.22344	1.11961	0.764537	-0.0344242	-0.123287
cluster1_green_Ath	AT5G12940	Carubv10003437	CARHR200510	Thhalv10013835	0.749645	1.20356	1.33933	1.43925	1.06255	1.58655	-0.458571	-1.65681	-1.18671
cluster1_green_Ath	AT5G13100	Carubv10002837	CARHR200370	Thhalv10013944	0.00443998	0.688826	0.883225	0.851015	1.12137	1.64489	0.755906	-0.0173415	0.547932
cluster1_green_Ath	AT5G13340	Carubv10001790	CARHR200100	Thhalv10014512	0.167861	0.96149	0.4961	-0.111166	1.14404	0.579584	0.0260863	-0.1093	0.0286704
cluster1_green_Ath	AT5G13500	Carubv10001266	CARHR199940	Thhalv10013935	0.872358	0.776087	1.03212	1.02777	1.04835	1.42484	0.146817	1.02018	0.351995
cluster1_green_Ath	AT5G13790	Carubv10002596	CARHR199650	Thhalv10014765	0.739312	1.16347	1.51829	0.698023	1.9235	1.16978	0.268783	-0.307598	0.869349
cluster1_green_Ath	AT5G15940	Carubv10001194	CARHR197370	Thhalv10013899	0.998102	0.865043	0.9345	0.987631	1.12171	1.04555	0.231865	-0.811851	0.338165
cluster1_green_Ath	AT5G17370	Carubv10000811	CARHR195840	Thhalv10015915	1.00972	0.460808	0.387697	0.147617	0.569352	0.360419	0.0578009	-0.00196141	0.416939
cluster1_green_Ath	AT5G20190	Carubv10001598	CARHR192630	Thhalv10014275	0.659671	-0.593666	0.525914	0.0728781	0.49997	0.812897	-0.0340547	-0.811266	-1.28431
cluster1_green_Ath	AT5G20990	Carubv10000376	CARHR191850	Thhalv10012894	1.13411	1.5242	1.15757	0.611082	1.3829	1.28647	0.499086	0.407875	0.20974
cluster1_green_Ath	AT5G21120	Carubv10000708	CARHR191750	Thhalv10013166	3.07119	2.52091	-0.366375	0.130532	0.674109	0.556998	-0.206305	1.46085	-0.205892
cluster1_green_Ath	AT5G21950	Carubv10001520	CARHR191580	Thhalv10014154	-0.0241767	0.281081	0.31013	0.748785	1.34399	0.686005	0.285634	-0.486053	1.01302
cluster1_green_Ath	AT5G24520	Carubv10001339	CARHR188910	Thhalv10004515	0.391715	1.02846	0.737492	0.960236	0.94733	0.759101	0.125463	0.191085	0.453987
cluster1_green_Ath	AT5G25790	Carubv10000816	CARHR187630	Thhalv10004002	0.462009	0.915846	0.331571	0.554828	1.03699	0.574625	0.41637	0.813039	0.220498
cluster1_green_Ath	AT5G27380	Carubv10000662	CARHR185970	Thhalv10003956	1.31308	0.976327	1.45219	0.529866	1.76011	0.882182	-0.373833	0.821686	0.0738113
cluster1_green_Ath	AT5G27830	Carubv10001564	CARHR186320	Thhalv10004669	0.547324	0.454903	0.711485	1.03004	1.01609	1.06582	0.201099	-0.0905494	-0.0710978
cluster1_green_Ath	AT5G34930	Carubv10007297	CARHR286880	Thhalv10020287	1.51774	1.23296	1.22623	0.990212	1.19402	1.46114	0.366213	-0.291903	-0.151958
cluster1_green_Ath	AT5G36290	Carubv10005380	CARHR216450	Thhalv10004689	0.496814	0.614831	0.781398	0.928034	0.842643	1.15568	0.388369	0.445235	0.512167
cluster1_green_Ath	AT5G36880	Carubv10006697	CARHR216250	Thhalv10027656	0.965152	1.04706	0.919839	0.43871	1.00364	0.879296	0.216652	0.402874	0.229038
cluster1_green_Ath	AT5G37770	Carubv10007462	CARHR215040	Thhalv10027972	0.34658	1.02339	1.07699	1.34089	1.27552	1.81088	0.553854	1.16003	-0.245721
cluster1_green_Ath	AT5G38610	Carubv10007129	CARHR214060	Thhalv10027940	0.944597	-0.159029	0.169208	0.482627	0.721708	0.989616	-1.79421	0.9569	0.19732
cluster1_green_Ath	AT5G39360	Carubv10005587	CARHR263030	Thhalv10027898	1.05056	0.37067	0.892907	0.580976	0.625478	0.553392	-0.0637892	-0.0648679	-0.601251
cluster1_green_Ath	AT5G39590	Carubv10004423	CARHR262700	Thhalv10027724	0.755251	0.58184	0.824975	0.606081	1.27964	0.893083	0.291818	0.228172	0.138105
cluster1_green_Ath	AT5G39660	Carubv10004614	CARHR262630	Thhalv10027747	0.59214	1.00266	0.245654	0.204706	1.07466	0.440708	0.56477	0.114996	0.262512
cluster1_green_Ath	AT5G39680	Carubv10006490	CARHR262610	Thhalv10027662	0.555956	1.08514	1.32842	0.219467	1.16302	0.327348	0.00899836	0.344476	0.222177
cluster1_green_Ath	AT5G40470	Carubv10007226	CARHR261520	Thhalv10028043	0.736517	0.409034	0.193362	0.378056	0.48445	0.113175	-1.52507	0.0458213	0.383922
cluster1_green_Ath	AT5G41070	Carubv10004991	CARHR213300	Thhalv10027807	0.522897	0.647738	0.282198	1.03938	0.461564	0.467785	0.547165	0.304583	-1.15946
cluster1_green_Ath	AT5G41800	Carubv10004788	CARHR212770	Thhalv10027762	0.954817	0.785545	0.938198	0.818202	0.937142	1.16816	0.387452	1.49168	-0.398115
cluster1_green_Ath	AT5G41900	Carubv10004670	CARHR212660	Thhalv10027739	1.83809	-0.0574501	0.547375	1.82299	0.138075	0.926415	-1.2839	0.16259	0.944398
cluster1_green_Ath	AT5G42350	Carubv10026174	CARHR284980	Thhalv10003171	0.398273	1.00882	0.616118	-0.170871	0.619512	0.583106	-0.0678589	0.12444	-0.141554
cluster1_green_Ath	AT5G42570	Carubv10027105	CARHR181800	Thhalv10003268	0.550537	0.487449	0.724293	0.828242	0.941388	1.00798	0.0229492	0.451335	0.0472488
cluster1_green_Ath	AT5G43180	Carubv10027030	CARHR180720	Thhalv10003266	0.373384	-0.0507711	0.250653	-0.0295413	0.485381	0.568628	0.0719441	0.223244	-1.51304
cluster1_green_Ath	AT5G43890	Carubv10026464	CARHR179540	Thhalv10003214	1.94762	-0.0911504	0.321383	1.64041	-0.647942	0.676862	0.398702	0.0548901	-0.59418
cluster1_green_Ath	AT5G44370	Carubv10026438	CARHR178760	Thhalv10003416	1.28206	1.15366	0.745084	1.23157	0.675624	0.985601	0.738775	0.490541	-0.539639
cluster1_green_Ath	AT5G44700	Carubv10027518	CARHR178200	Thhalv10000741	1.69555	1.59879	0.863134	0.198929	0.0306592	0.836408	0.0354514	-0.423184	0.289549
cluster1_green_Ath	AT5G44860	Carubv10026792	CARHR177950	Thhalv10001106	0.307883	1.12514	0.201087	1.08044	1.10468	0.088783	0.357963	0.790655	-0.13648
cluster1_green_Ath	AT5G45100	Carubv10026762	CARHR177510	Thhalv10001241	0.519729	1.30042	1.31279	1.24878	1.61554	1.238	0.473687	1.04662	-0.227966
cluster1_green_Ath	AT5G45480	Carubv10025861	CARHR176550	Thhalv10000764	0.782324	0.981877	0.491621	0.815516	0.358164	1.32906	-0.131083	-0.46783	0.24373
cluster1_green_Ath	AT5G45840	Carubv10025993	CARHR176130	Thhalv10000802	1.80314	-0.22081	0.0783995	-0.379896	0.705254	0.838971	-0.744806	0.348455	0.36199
cluster1_green_Ath	AT5G46050	Carubv10026112	CARHR175880	Thhalv10000830	1.39683	0.514809	1.1278	1.45718	0.975861	1.62864	1.10296	-0.549909	-0.11665
cluster1_green_Ath	AT5G46590	Carubv10028284	CARHR174990	Thhalv10001200	1.70036	-0.178936	1.5015	0.28287	0.249797	1.73045	1.46296	-1.21927	-0.280843
cluster1_green_Ath	AT5G47050	Carubv10027000	CARHR174420	Thhalv10000973	0.660593	0.882256	0.808768	1.04655	1.28972	1.39275	0.760865	0.71493	0.0343324
cluster1_green_Ath	AT5G47250	Carubv10025875	CARHR174100	Thhalv10000773	1.40233	0.549224	0.397863	-0.45399	0.12329	1.52267	-0.0131383	-0.0173415	0.567511
cluster1_green_Ath	AT5G48370	Carubv10026342	CARHR183840	Thhalv10004228	0.361229	1.22607	0.856522	0.312268	1.15004	0.669705	0.188607	0.554206	-0.377071
cluster1_green_Ath	AT5G48385	Carubv10026179	CARHR183810	Thhalv10003930	0.720701	0.663571	0.542838	0.615493	1.08556	0.681155	0.233535	0.22859	0.987036
cluster1_green_Ath	AT5G48560	Carubv10026241	CARHR183460	Thhalv10004031	0.289674	0.292306	0.732111	0.469393	0.715159	0.618971	1.10984	0.0710047	-0.0434378
cluster1_green_Ath	AT5G48650	Carubv10026377	CARHR183310	Thhalv10004460	-0.601515	0.340402	0.300899	-0.0477647	0.342561	1.76235	0.633169	0.00115178	-0.454767
cluster1_green_Ath	AT5G48670	Carubv10014232	CARHR180810	Thhalv10023873	1.59773	-0.859301	-0.0382534	0.0365525	0.873186	-0.163707	-0.741123	-0.24156	0.338165
cluster1_green_Ath	AT5G49900	Carubv10025826	CARHR258820	Thhalv10012588	1.00418	1.32286	0.448887	-0.168179	1.26063	0.456689	-0.413696	-0.588242	-0.104841
cluster1_green_Ath	AT5G50210	Carubv10026195	CARHR258410	Thhalv10012812	1.22407	1.04997	0.567934	0.560843	0.830993	0.618661	-0.164536	-0.371545	-0.118785
cluster1_green_Ath	AT5G50915	Carubv10026852	CARHR257350	Thhalv10014242	0.257587	1.15146	1.43749	1.16651	0.741701	2.17566	1.41591	-1.07669	-0.916349
cluster1_green_Ath	AT5G51050	Carubv10027500	CARHR257040	Thhalv10013343	0.575503	0.999079	0.94051	0.281354	1.52743	1.15313	-0.0120767	-0.0559289	0.183466
cluster1_green_Ath	AT5G51200	Carubv10028249	CARHR118630	Thhalv10002339	1.10627	1.41273	0.682898	0.34511	0.695214	0.792516	-0.588834	-0.161308	-0.0752026
cluster1_green_Ath	AT5G51480	Carubv10026165	CARHR264220	Thhalv10013035	2.11549	1.3767	1.12256	1.54664	0.995205	0.796859	0.371543	0.435713	-0.0568834
cluster1_green_Ath	AT5G51780	Carubv10027166	CARHR264660	Thhalv10015297	0.111605	0.683758	0.648644	0.379566	1.21473	1.09793	-0.0190968	0.769724	0.372525
cluster1_green_Ath	AT5G52210	Carubv10028360	CARHR265130	Thhalv10014702	0.302432	0.329674	0.825492	0.790573	1.05122	0.866009	0.480304	0.923428	0.0351158
cluster1_green_Ath	AT5G52410	Carubv10025937	CARHR265350	Thhalv10012763	0.167111	1.86453	0.388502	-0.490359	0.328729	0.73781	-0.822074	0.0473275	0.196025
cluster1_green_Ath	AT5G52450	Carubv10026303	CARHR265440	Thhalv10013374	1.37873	0.429062	0.924732	0.705955	0.403594	1.06292	0.478132	0.591842	0.367185
cluster1_green_Ath	AT5G53060	Carubv10026043	CARHR266080	Thhalv10012933	0.596202	1.05986	0.989104	0.0964564	1.17614	0.662653	0.798249	0.486763	0.14498
cluster1_green_Ath	AT5G54140	Carubv10026837	CARHR267330	Thhalv10014131	1.05342	0.754686	0.125579	0.444577	0.746418	0.721986	-0.38874	-0.484412	-0.296842
cluster1_green_Ath	AT5G54590	Carubv10026619	CARHR267880	Thhalv10013594	0.317407	1.08314	0.104648	0.238436	0.65133	0.988938	1.42823	-0.0724949	-0.464311
cluster1_green_Ath	AT5G56260	Carubv10027261	CARHR269660	Thhalv10014864	0.743148	0.706468	1.07668	1.15277	1.3055	1.30677	0.920162	-0.160352	0.506559
cluster1_green_Ath	AT5G56840	Carubv10026949	CARHR270590	Thhalv10014394	0.692433	1.75563	1.91829	0.951137	1.62164	2.04985	-0.572793	0.399124	0.0378417
cluster1_green_Ath	AT5G57050	Carubv10026433	CARHR270810	Thhalv10013611	0.347274	0.146906	0.300306	0.119092	1.05535	0.117451	-0.947374	0.788062	-0.625226
cluster1_green_Ath	AT5G57090	Carubv10026053	CARHR270850	Thhalv10012929	0.703956	0.288396	0.245794	0.17475	0.268961	0.427971	0.303186	-0.00289692	-1.03174
cluster1_green_Ath	AT5G57210	Carubv10025951	CARHR271000	Thhalv10012758	0.880071	1.14289	0.873513	0.0128093	1.10613	0.521366	-0.0797667	0.774695	0.643587
cluster1_green_Ath	AT5G57390	Carubv10026181	CARHR271190	Thhalv10013143	0.130738	0.845627	0.432211	-0.120613	0.332747	1.32175	1.01206	0.378185	-0.0175054
cluster1_green_Ath	AT5G58110	Carubv10027708	CARHR271940	Thhalv10014732	0.322263	0.774086	0.732724	0.813571	0.905672	1.11098	0.0374698	-0.31646	-0.184319
cluster1_green_Ath	AT5G58160	Carubv10025755	CARHR271970	Thhalv10012463	1.42964	1.64541	1.3181	0.62563	1.61815	1.34773	0.307796	0.261028	0.290476
cluster1_green_Ath	AT5G61440	Carubv10026990	CARHR275200	Thhalv10004776	0.364994	0.752077	0.399257	0.71636	1.02846	1.09573	-0.150437	0.276807	0.844092
cluster1_green_Ath	AT5G62220	Carubv10028275	CARHR276000	Thhalv10005582	-0.393202	0.463306	0.67071	-0.112754	1.2016	1.07308	0.127145	-0.767237	0.614491
cluster1_green_Ath	AT5G63850	Carubv10027867	CARHR277750	Thhalv10004152	0.902446	0.736818	0.714089	0.523534	1.15705	0.847058	0.0295576	0.89372	0.621648
cluster1_green_Ath	AT5G63880	Carubv10027101	CARHR277780	Thhalv10004899	0.866105	0.79057	0.727593	0.629608	1.18089	1.00885	0.510076	0.245463	0.0733133
cluster1_green_Ath	AT5G64110	Carubv10027924	CARHR278020	Thhalv10004567	0.357274	0.97915	0.501286	0.951389	0.733905	1.09394	0.962379	0.313073	-1.01033
cluster1_green_Ath	AT5G64700	Carubv10026557	CARHR278690	Thhalv10004484	1.01664	0.475739	1.53049	0.444345	1.55253	2.02593	-0.0288161	0.299816	0.634993
cluster1_green_Ath	AT5G65140	Carubv10026620	CARHR279050	Thhalv10004405	0.97528	0.771232	1.16574	0.719479	1.40949	1.70719	-0.0258078	1.09466	0.736694
cluster1_green_Ath	AT5G66300	Carubv10026898	CARHR281410	Thhalv10005380	0.902934	0.592676	0.541642	0.603735	1.60414	0.215919	0.429695	0.277026	-0.559128
cluster1_green_Ath	AT5G66740	Carubv10026618	CARHR280980	Thhalv10004430	-0.673003	0.07016	1.08882	1.19638	1.30353	1.57517	0.0247063	0.0622585	-1.52378
cluster1_green_Ath	AT5G66940	Carubv10027688	CARHR280760	Thhalv10005685	-0.167439	0.325517	1.20527	1.01841	1.21104	1.75772	0.949671	-0.0398671	-0.245664
cluster1_green_Ath	AT5G67540	Carubv10027885	CARHR280060	Thhalv10004148	0.617617	0.786105	0.963838	0.743098	1.01829	0.754239	-0.308026	0.176613	-0.190824
cluster1_green_Ath	AT5G67620	Carubv10027216	CARHR279970	Thhalv10004994	0.611416	0.509999	0.283678	0.290443	2.21346	1.43947	0.0878853	-0.541066	1.23385
cluster2	AT1G01480	Carubv10009396	CARHR000890	Thhalv10007457	4.11796	3.42769	3.20232	3.03831	2.98346	2.56651	6.31288	1.92164	1.9125
cluster2	AT1G02360	Carubv10010007	CARHR001680	Thhalv10008465	4.70129	4.69042	3.75518	3.52987	5.14347	4.51625	6.90227	1.08193	4.81381
cluster2	AT1G02400	Carubv10009706	CARHR001720	Thhalv10008179	3.88638	4.391	3.89761	3.20248	4.52625	4.73769	6.10245	4.08437	4.17054
cluster2	AT1G03220	Carubv10011636	CARHR002340	Thhalv10007672	3.20871	4.17115	3.80203	3.08466	4.77721	4.28299	4.98574	4.01583	3.64492
cluster2	AT1G04370	Carubv10011057	CARHR003700	Thhalv10009418	4.59576	2.19929	4.59285	1.82558	5.27539	5.43633	5.26997	3.32648	6.97092
cluster2	AT1G07000	Carubv10011870	CARHR006680	Thhalv10007127	3.82665	3.79712	3.62829	3.53439	4.59234	4.75021	3.73435	2.7935	2.75106
cluster2	AT1G08860	Carubv10008668	CARHR008780	Thhalv10007173	6.28678	5.41757	5.04978	3.10919	5.68799	5.04915	2.3583	2.59904	2.78863
cluster2	AT1G08940	Carubv10009965	CARHR008850	Thhalv10008391	2.90908	2.86581	3.09337	2.60409	3.86611	3.86873	4.45897	4.09441	5.17764
cluster2	AT1G09932	Carubv10011217	CARHR010000	Thhalv10008516	4.16459	3.84336	4.40102	3.11599	4.13277	3.83229	4.15352	0.768673	4.28949
cluster2	AT1G09940	Carubv10008813	CARHR010060	Thhalv10007359	2.58645	4.0151	3.24663	2.64421	4.31873	4.87949	3.8696	3.37766	3.2564
cluster2	AT1G11925	Carubv10010604	CARHR012270	Thhalv10009060	6.38334	6.32523	6.2075	3.25559	6.4092	6.33174	4.78156	0.808536	3.88103
cluster2	AT1G13210	Carubv10008116	CARHR013590	Thhalv10006589	3.70387	4.50675	3.40304	2.97244	3.90796	4.36725	4.83488	3.9102	4.79278
cluster2	AT1G14870	Carubv10010549	CARHR015410	Thhalv10009008	2.89518	3.38475	2.32473	3.14414	3.43537	4.23521	4.13614	4.01942	3.09511
cluster2	AT1G16420	Carubv10011040	CARHR016890	Thhalv10007917	5.95522	7.06454	4.81682	4.20244	6.38781	5.70835	2.74313	1.24596	1.96549
cluster2	AT1G17380	Carubv10009758	CARHR017980	Thhalv10008415	3.46862	3.72598	4.34759	1.87509	5.76667	4.76552	2.0886	2.24758	5.0977
cluster2	AT1G17420	Carubv10008244	CARHR018010	Thhalv10006732	2.61405	2.96768	3.44608	3.19265	3.80348	3.87088	2.95283	1.10263	5.96224
cluster2	AT1G18390	Carubv10008544	CARHR018990	Thhalv10007020	3.65715	3.8935	3.32534	3.09422	3.59617	4.59528	4.10527	2.29812	3.82797
cluster2	AT1G18570	Carubv10009563	CARHR019190	Thhalv10008152	4.31263	4.56509	3.79028	3.14227	4.44656	5.05501	7.30773	2.2405	3.70499
cluster2	AT1G20310	Carubv10010139	CARHR020790	Thhalv10009337	4.68631	3.91655	2.86221	3.4746	4.00015	6.23051	6.53381	3.61626	3.66282
cluster2	AT1G21326	Carubv10010842	CARHR021710	Thhalv10008673	1.9914	3.21753	2.93994	3.11276	3.56027	3.40102	6.89726	3.06449	6.03689
cluster2	AT1G24150	Carubv10008361	CARHR024530	Thhalv10006885	3.1979	3.18794	3.1268	2.69027	3.65464	3.55267	5.64938	2.96373	4.11551
cluster2	AT1G25390	Carubv10011668	CARHR026090	Thhalv10007057	2.40995	3.57419	2.76048	2.27861	3.53153	3.56238	4.74427	3.47089	3.72257
cluster2	AT1G26420	Carubv10008831	CARHR025530	Thhalv10007352	5.36838	4.79528	4.50225	3.84576	4.96416	6.55346	5.66449	5.22428	2.77091
cluster2	AT1G27730	Carubv10010130	CARHR027240	Thhalv10010032	3.83086	4.08463	3.85879	2.93597	4.58986	4.91145	5.00783	2.97588	3.37758
cluster2	AT1G28190	Carubv10010017	CARHR027680	Thhalv10008463	3.18833	4.59909	3.78713	3.13335	4.65714	4.29451	6.00269	5.22388	4.53766
cluster2	AT1G28380	Carubv10008612	CARHR027880	Thhalv10007105	3.14939	3.65191	2.99558	2.57238	3.53513	3.70479	3.76271	3.07392	3.24145
cluster2	AT1G29290	Carubv10010707	CARHR028610	Thhalv10009585	2.45507	3.38695	3.56473	2.33675	3.56718	4.40772	5.57295	4.50891	3.33554
cluster2	AT1G29860	Carubv10009934	CARHR029580	Thhalv10009672	3.87342	4.73284	2.79937	2.97412	2.65644	2.54579	3.18263	4.21347	6.10815
cluster2	AT1G30135	Carubv10010507	CARHR029250	Thhalv10009598	2.47929	3.96984	6.26637	2.18135	5.60477	5.88265	3.40803	2.14738	5.24014
cluster2	AT1G30370	Carubv10012471	CARHR029760	Thhalv10007346	3.87516	4.71565	4.1148	2.66361	4.90086	4.3534	6.19586	3.34209	3.09209
cluster2	AT1G30700	Carubv10008825	CARHR030170	Thhalv10007341	3.79364	4.53219	3.78382	3.5697	5.18149	4.41325	4.11754	4.62434	3.94854
cluster2	AT1G30755	Carubv10010994	CARHR030220	Thhalv10007107	3.75965	4.70947	3.89758	3.1407	4.87779	4.46676	6.22218	3.8153	3.32228
cluster2	AT1G33030	Carubv10009584	CARHR032350	Thhalv10008040	4.93066	3.1982	3.66671	2.97538	3.66536	4.84489	4.11184	3.6836	4.03158
cluster2	AT1G35210	Carubv10011701	CARHR287280	Thhalv10001870	4.24545	4.16876	4.77633	2.92906	4.60278	6.41617	5.15287	5.19426	3.04226
cluster2	AT1G49000	Carubv10011210	CARHR039030	Thhalv10011830	6.57929	3.76036	3.93446	4.72091	5.99465	5.43691	5.824	2.31551	3.67614
cluster2	AT1G51800	Carubv10008261	CARHR041950	Thhalv10011223	4.73521	3.51734	2.70312	3.14816	3.20338	4.06561	6.15857	2.35819	2.87907
cluster2	AT1G51890	Carubv10008262	CARHR042010	Thhalv10011236	4.29316	4.06305	2.76396	3.17052	3.86665	4.46758	5.07261	3.19635	1.44875
cluster2	AT1G51915	Carubv10012353	CARHR042060	Thhalv10012030	6.31132	4.10882	4.08878	4.2664	6.05067	6.78868	4.78566	2.23708	0.338165
cluster2	AT1G52200	Carubv10010385	CARHR042340	Thhalv10011813	3.78435	2.72931	2.80016	3.18345	3.01529	3.88483	4.0039	2.91736	4.56797
cluster2	AT1G58225	Carubv10021116	CARHR053770	Thhalv10023749	6.77247	4.53976	3.91727	4.08471	5.01655	5.38225	2.26274	4.95041	4.29846
cluster2	AT1G59870	Carubv10019656	CARHR053210	Thhalv10018005	3.96033	3.53335	2.81578	2.83097	2.99848	3.69128	6.29174	3.25969	4.04338
cluster2	AT1G61560	Carubv10020030	CARHR050850	Thhalv10023372	4.52288	5.65827	5.39063	4.1895	5.51985	5.56947	3.9524	4.10295	6.282
cluster2	AT1G61610	Carubv10019792	CARHR050770	Thhalv10023270	3.26199	2.51536	1.93748	0.856806	2.92117	2.88216	9.03101	7.17735	2.83572
cluster2	AT1G62300	Carubv10020051	CARHR049820	Thhalv10023390	4.54588	3.95171	3.89388	3.65096	4.67857	4.62534	5.80304	2.44608	4.36408
cluster2	AT1G64065	Carubv10022353	CARHR046870	Thhalv10023687	3.03348	3.78817	3.97633	3.29745	5.09607	5.10996	6.41211	4.82254	1.50881
cluster2	AT1G65690	Carubv10020710	CARHR057490	Thhalv10019035	3.27695	3.74021	3.02007	3.2944	3.52599	2.89867	4.71792	3.94774	5.1869
cluster2	AT1G66160	Carubv10020330	CARHR292310	Thhalv10018597	2.75802	2.36794	3.24123	2.79006	3.27977	3.38099	3.82888	4.49893	5.61422
cluster2	AT1G67920	Carubv10021260	CARHR060560	Thhalv10019740	4.00973	5.95846	4.54653	3.57841	4.98273	5.28724	5.61554	3.27158	3.15741
cluster2	AT1G68450	Carubv10021516	CARHR061230	Thhalv10019299	3.35741	3.99625	2.96437	2.22992	3.19891	2.80551	6.52386	4.36182	4.97051
cluster2	AT1G68765	Carubv10021238	CARHR061590	Thhalv10019748	5.83472	4.11129	3.75235	3.32328	4.12117	3.17905	6.25745	3.42753	5.10809
cluster2	AT1G74360	Carubv10019700	CARHR067620	Thhalv10018042	4.9728	5.64856	4.03259	3.62478	4.95862	5.47566	5.01904	4.47684	4.18275
cluster2	AT1G76070	Carubv10020800	CARHR069610	Thhalv10018992	2.94326	3.8279	4.01058	3.10642	4.46379	5.01924	3.97248	3.99443	4.20608
cluster2	AT1G76600	Carubv10022093	CARHR070160	Thhalv10019130	3.47054	4.5408	4.17953	3.2733	4.26599	5.47706	4.44955	1.87298	2.85797
cluster2	AT1G80840	Carubv10020726	CARHR073630	Thhalv10018925	4.62207	4.46569	4.20189	3.43059	4.23987	5.13971	5.39298	5.03083	6.97939
cluster2	AT2G04515	Carubv10014723	CARHR102400	Thhalv10003003	3.66831	2.56531	2.34374	2.69081	3.79192	3.62293	6.40816	6.01514	3.05529
cluster2	AT2G20562	Carubv10015034	CARHR111130	Thhalv10002140	3.52773	4.05812	4.48723	3.46697	5.01629	5.61054	6.71389	3.60787	3.94882
cluster2	AT2G22320	Carubv10024843	CARHR113550	Thhalv10000443	3.38609	6.42355	6.48243	4.11468	6.27595	6.87282	4.33304	1.97923	3.11957
cluster2	AT2G22500	Carubv10025249	CARHR113700	Thhalv10000240	3.87327	3.57092	3.8838	3.24746	4.54641	6.05242	3.6573	2.98371	3.6514
cluster2	AT2G23320	Carubv10023662	CARHR292960	Thhalv10000270	2.66643	3.00076	2.86797	3.14896	3.64318	4.19886	4.60193	2.65761	2.80156
cluster2	AT2G23770	Carubv10022835	CARHR184800	Thhalv10000091	3.17251	3.42902	3.49993	2.91344	3.78345	4.01029	6.46924	2.86392	3.67649
cluster2	AT2G27310	Carubv10025102	CARHR119880	Thhalv10002035	2.28024	3.73106	3.19052	2.6808	4.35046	4.41822	3.5064	3.10357	4.22522
cluster2	AT2G27660	Carubv10025280	CARHR120270	Thhalv10016319	4.10324	3.20782	2.65252	3.50291	3.81379	3.69562	4.95727	2.22774	2.04226
cluster2	AT2G31865	Carubv10025449	CARHR125550	Thhalv10016528	3.08322	2.86809	3.02948	2.85057	3.59338	3.5443	5.62906	4.1651	2.70842
cluster2	AT2G32240	Carubv10022514	CARHR126030	Thhalv10016148	4.72832	3.6013	2.75263	1.9788	3.38532	3.87815	4.36663	3.53576	3.81834
cluster2	AT2G33580	Carubv10024693	CARHR127600	Thhalv10016366	3.32043	3.89752	3.30322	3.46051	3.83429	4.3452	4.28989	2.28675	4.21511
cluster2	AT2G33710	Carubv10025511	CARHR127730	Thhalv10017235	3.75146	4.42876	4.53727	3.24	5.28925	5.57913	7.46619	4.33093	4.36929
cluster2	AT2G34930	Carubv10025647	CARHR129100	Thhalv10016209	2.96008	3.73301	3.5287	2.87176	3.65411	3.2436	5.37429	1.6678	2.62825
cluster2	AT2G35658	Carubv10025130	CARHR129910	Thhalv10017475	2.74225	3.03449	2.76291	3.61016	4.31537	4.88244	7.07737	1.75569	2.21505
cluster2	AT2G35710	Carubv10022998	CARHR129950	Thhalv10016563	2.97003	4.12098	3.46003	2.95608	4.61549	4.21707	5.75527	5.91388	5.92224
cluster2	AT2G35930	Carubv10024934	CARHR130190	Thhalv10016730	4.6209	5.25457	4.76858	3.79109	5.60011	5.56114	6.14475	2.6812	3.83531
cluster2	AT2G36440	Carubv10024438	CARHR130740	Thhalv10017612	2.65602	2.44188	3.29752	2.29284	2.25452	1.75861	7.23241	3.82883	6.82335
cluster2	AT2G36690	Carubv10023480	CARHR130980	Thhalv10016820	3.87033	3.71666	3.53307	3.27867	4.84473	4.70037	8.27886	5.63875	2.54035
cluster2	AT2G37940	Carubv10023705	CARHR132490	Thhalv10017001	2.9988	3.39935	2.55047	2.82862	4.12222	4.06807	4.4954	3.44592	3.44605
cluster2	AT2G38470	Carubv10023006	CARHR133160	Thhalv10016542	3.58998	4.68312	3.80562	2.98761	4.27556	4.62434	5.35903	3.97378	3.91252
cluster2	AT2G38870	Carubv10024461	CARHR133600	Thhalv10017502	3.19097	3.45013	3.63777	3.37525	4.55515	5.59549	3.30665	5.26991	3.30746
cluster2	AT2G39200	Carubv10022893	CARHR133950	Thhalv10016436	4.94137	4.83637	4.17235	4.31209	4.92361	4.7075	5.9868	2.79647	4.11726
cluster2	AT2G39518	Carubv10024171	CARHR134410	Thhalv10017310	3.34029	3.1265	3.00159	3.67655	3.62599	4.3028	5.19743	2.74059	1.98185
cluster2	AT2G40000	Carubv10025158	CARHR134950	Thhalv10017972	2.7286	3.60325	2.90179	2.88147	4.72229	3.51885	4.30112	2.49624	3.8594
cluster2	AT2G40095	Carubv10024065	CARHR135060	Thhalv10017237	2.46054	3.47454	3.34018	3.03978	4.38462	4.43989	3.50613	2.02108	3.91663
cluster2	AT2G40140	Carubv10022848	CARHR135150	Thhalv10016372	2.44681	3.70032	3.03296	2.3585	3.3738	3.59881	5.07737	3.47713	3.5197
cluster2	AT2G40170	Carubv10025705	CARHR135200	Thhalv10017713	1.22575	2.96573	3.89668	4.41629	4.52954	1.97629	10.8844	0.274357	6.06949
cluster2	AT2G41010	Carubv10024784	CARHR136130	Thhalv10017173	2.55705	2.93407	3.11041	3.04289	3.44189	4.12673	4.97758	4.1942	1.91171
cluster2	AT2G42360	Carubv10023972	CARHR137410	Thhalv10017175	4.26181	4.62018	3.94369	4.27846	4.5946	5.09019	7.04283	3.43587	2.85619
cluster2	AT2G43000	Carubv10023730	CARHR138060	Thhalv10017054	4.24298	4.91541	4.612	3.2712	4.72975	5.08311	3.30612	5.02606	4.0416
cluster2	AT2G44370	Carubv10024700	CARHR139540	Thhalv10001601	3.38022	4.44682	3.36042	4.14779	4.59955	4.13443	5.10836	3.27639	3.22849
cluster2	AT2G44578	Carubv10025313	CARHR139780	Thhalv10001745	4.57133	3.14181	4.81901	1.24282	4.58255	4.58086	4.50118	7.465	6.18198
cluster2	AT2G45760	Carubv10024657	CARHR141040	Thhalv10001640	4.69799	5.01494	4.2622	2.48908	5.62023	6.60651	5.30373	6.05562	4.20032
cluster2	AT2G47190	Carubv10023831	CARHR142580	Thhalv10001584	3.24363	5.14447	3.77154	2.8646	3.7791	4.62361	5.79767	3.44993	5.39932
cluster2	AT2G47550	Carubv10022923	CARHR142960	Thhalv10001380	3.47699	3.0214	1.961	3.03462	2.83054	3.42178	4.50366	4.45021	4.07543
cluster2	AT3G07195	Carubv10014540	CARHR081840	Thhalv10021478	4.2995	4.94725	4.44647	4.11354	5.57527	6.15307	5.94396	3.4865	5.12242
cluster2	AT3G09020	Carubv10013835	CARHR083360	Thhalv10022431	3.07094	3.55117	2.79027	2.47856	3.75988	3.76692	4.81431	3.18374	5.2021
cluster2	AT3G09520	Carubv10013194	CARHR083910	Thhalv10020295	6.04405	4.32997	3.8222	3.61289	4.33189	4.8753	3.68997	3.30922	5.52238
cluster2	AT3G09830	Carubv10013766	CARHR084280	Thhalv10020792	3.48689	3.30487	3.11676	2.80979	3.49556	3.86465	4.63041	2.72747	3.34565
cluster2	AT3G11820	Carubv10014219	CARHR086370	Thhalv10021072	2.84011	3.4483	3.43605	3.0001	4.10751	4.37825	4.1391	2.43998	2.98016
cluster2	AT3G11840	Carubv10016030	CARHR086390	Thhalv10020668	3.72714	5.62823	4.9094	3.75534	5.0955	5.76835	5.56872	-0.0173415	5.56978
cluster2	AT3G16530	Carubv10016113	CARHR090330	Thhalv10021294	3.57794	2.92908	3.61939	3.39324	3.86035	4.65834	7.64582	3.06941	3.01896
cluster2	AT3G18250	Carubv10015096	CARHR093600	Thhalv10022120	4.12018	5.35732	3.30255	4.69982	5.07896	5.68079	3.96398	1.52947	1.97691
cluster2	AT3G18690	Carubv10015299	CARHR094070	Thhalv10021464	2.11782	3.26882	3.28299	3.03442	3.91695	4.48652	3.95492	2.44591	3.73894
cluster2	AT3G21070	Carubv10013436	CARHR096910	Thhalv10020469	3.15253	3.6696	3.19163	2.9645	4.28205	3.48172	3.10916	3.38353	4.08525
cluster2	AT3G22060	Carubv10014454	CARHR097920	Thhalv10021371	3.23629	4.00565	3.75244	3.55009	4.4965	4.59818	4.68227	2.37866	5.27544
cluster2	AT3G23220	Carubv10014873	CARHR099170	Thhalv10022200	1.68296	4.93121	6.06866	2.06302	3.74456	4.84075	4.34618	3.32463	8.8892
cluster2	AT3G25610	Carubv10016594	CARHR146590	Thhalv10003538	4.19626	4.51799	3.36293	2.64837	4.49171	4.43769	4.65841	3.9809	3.32903
cluster2	AT3G26500	Carubv10019038	CARHR147490	Thhalv10004130	4.31721	3.51425	3.13527	3.63978	4.31721	4.4942	4.41458	3.08347	3.58128
cluster2	AT3G26910	Carubv10018844	CARHR148000	Thhalv10003842	3.01135	4.01158	3.3164	2.83659	3.7061	4.14987	4.32159	3.71948	3.59861
cluster2	AT3G26980	Carubv10018253	CARHR148150	Thhalv10005144	2.30474	2.92638	3.04166	2.86494	3.55785	3.89516	3.77159	4.48354	3.72622
cluster2	AT3G28850	Carubv10017269	CARHR151840	Thhalv10004235	2.96542	2.24753	3.13024	3.13492	3.89682	4.30314	5.98081	2.99576	3.88375
cluster2	AT3G29000	Carubv10018075	CARHR152090	Thhalv10005639	4.9276	5.3776	4.5813	3.65421	5.57299	6.51065	3.94356	5.31494	2.69545
cluster2	AT3G44860	Carubv10017524	CARHR151170	Thhalv10002598	3.67127	4.97593	4.50821	2.65598	6.49124	5.48395	1.89486	6.62405	0.0510512
cluster2	AT3G45060	Carubv10019442	CARHR150910	Thhalv10002919	5.24991	6.04781	6.70019	4.13316	5.89819	5.43967	3.88117	-0.664362	2.64528
cluster2	AT3G48450	Carubv10018325	CARHR157210	Thhalv10011071	2.57399	2.72078	3.72704	1.61331	4.315	2.95321	7.42599	5.05127	3.06982
cluster2	AT3G50930	Carubv10017002	CARHR153680	Thhalv10010287	4.47032	3.78017	3.00899	2.22282	3.24739	4.90557	5.83569	4.33376	3.26839
cluster2	AT3G52400	Carubv10017581	CARHR162170	Thhalv10010514	3.93091	4.2698	3.75682	3.33046	4.66042	5.15638	5.67989	4.84848	3.74498
cluster2	AT3G52450	Carubv10019493	CARHR162220	Thhalv10010389	4.42803	3.89439	3.68981	3.37461	4.47096	4.64503	5.19001	2.74559	3.4714
cluster2	AT3G53150	Carubv10018449	CARHR163000	Thhalv10011062	1.83592	3.47112	2.0352	2.76263	4.60363	2.52522	8.17582	7.13508	4.73491
cluster2	AT3G54420	Carubv10017824	CARHR164320	Thhalv10010625	3.57669	2.16488	2.81285	3.8058	4.82769	2.99219	7.03683	3.64473	3.99574
cluster2	AT3G55150	Carubv10019317	CARHR165180	Thhalv10010195	2.95262	4.40297	2.25153	2.54556	2.86394	2.46488	8.28389	3.47195	2.36035
cluster2	AT3G55950	Carubv10019171	CARHR166030	Thhalv10005797	3.2046	3.6253	3.39708	2.64276	3.79313	3.80178	5.21827	3.65582	3.11087
cluster2	AT3G55980	Carubv10016897	CARHR166060	Thhalv10005860	3.31585	4.82202	3.82098	3.12852	4.53157	4.53954	4.92448	2.91823	2.25381
cluster2	AT3G56500	Carubv10019268	CARHR166620	Thhalv10006496	3.59508	3.76585	2.77931	2.68859	5.09721	3.6974	6.08371	5.40378	5.63509
cluster2	AT3G57450	Carubv10018323	CARHR167650	Thhalv10006420	2.95563	3.53696	3.69482	3.06549	4.085	4.54731	4.71932	2.24498	3.10101
cluster2	AT3G59080	Carubv10016982	CARHR169500	Thhalv10005882	2.98028	3.60966	3.48735	2.77809	3.81582	3.6935	4.70158	4.72173	4.14661
cluster2	AT3G59700	Carubv10016803	CARHR170070	Thhalv10005823	3.62687	4.05114	2.90328	2.06955	4.48239	4.10677	4.00879	3.48351	4.87058
cluster2	AT4G01010	Carubv10000339	CARHR249330	Thhalv10028473	3.62789	3.72462	3.13783	2.26606	4.06796	4.14406	4.84188	3.29047	3.44088
cluster2	AT4G01250	Carubv10001446	CARHR249050	Thhalv10028843	3.69525	4.62801	3.84469	3.64642	4.96748	5.12458	5.20296	2.3919	2.99179
cluster2	AT4G01700	Carubv10002987	CARHR249970	Thhalv10028870	4.64519	3.86107	3.45573	3.76601	4.54174	4.47901	5.06176	3.85299	3.42851
cluster2	AT4G04510	Carubv10000409	CARHR250370	Thhalv10028498	5.14151	6.35399	2.93583	4.22081	3.59164	2.51376	4.84841	2.04825	1.19225
cluster2	AT4G04540	Carubv10000412	CARHR252960	Thhalv10028501	8.21285	5.76488	4.46176	3.30997	5.20336	3.30814	2.50167	7.06038	3.03784
cluster2	AT4G08555	Carubv10002386	CARHR259590	Thhalv10029113	3.13119	3.29807	2.32472	2.51442	3.45401	5.36409	5.32522	4.23382	3.57211
cluster2	AT4G11170	Carubv10000100	CARHR054230	Thhalv10023232	5.29807	5.64201	4.3447	3.7381	4.91863	6.27471	2.99032	2.59213	1.99935
cluster2	AT4G11280	Carubv10000800	CARHR255310	Thhalv10028605	3.09379	3.42431	2.71814	2.16428	3.15986	4.39376	4.34807	4.21066	2.96203
cluster2	AT4G11890	Carubv10001286	CARHR254410	Thhalv10029460	5.35562	3.84108	3.39361	3.01128	4.41056	4.74772	5.34879	2.91033	4.62153
cluster2	AT4G14365	Carubv10005117	CARHR220580	Thhalv10025615	5.2389	4.79178	4.24629	3.79944	4.85746	5.54409	5.09416	4.43465	2.35676
cluster2	AT4G15120	Carubv10007700	CARHR221860	Thhalv10026342	2.29506	4.03243	3.76533	2.80861	5.29467	4.63069	6.70557	1.75394	3.71329
cluster2	AT4G15417	Carubv10007185	CARHR222160	Thhalv10025932	4.01016	4.22638	3.63937	5.1803	5.38688	5.09647	5.29315	-0.545662	3.67608
cluster2	AT4G17490	Carubv10005314	CARHR224160	Thhalv10027543	3.2835	3.87277	3.56653	2.82692	4.49551	4.50414	6.99606	5.22488	2.79503
cluster2	AT4G18170	Carubv10005249	CARHR224920	Thhalv10025806	3.17402	3.98214	4.07728	3.81408	4.74019	4.90729	7.30867	3.67324	2.84686
cluster2	AT4G18250	Carubv10004372	CARHR225010	Thhalv10024677	4.89604	4.03686	3.16456	3.48686	4.29961	4.80752	5.10469	2.7126	3.11939
cluster2	AT4G18430	Carubv10005708	CARHR225260	Thhalv10026206	3.35064	3.14671	2.87301	2.905	4.05078	3.42799	3.89811	4.24362	4.2514
cluster2	AT4G18880	Carubv10004953	CARHR225760	Thhalv10025409	3.09506	3.40191	3.13404	2.56583	3.39572	4.24529	4.1325	3.75683	2.69886
cluster2	AT4G20000	Carubv10005634	CARHR226780	Thhalv10026244	4.72572	3.09462	3.0908	3.99728	3.75385	4.36427	3.04323	3.92024	3.17436
cluster2	AT4G20780	Carubv10006646	CARHR227320	Thhalv10026325	4.49332	4.64115	4.46963	4.00288	5.60356	6.41547	3.96916	3.8352	4.69042
cluster2	AT4G21390	Carubv10006676	CARHR227990	Thhalv10025357	4.7969	5.18396	4.83588	3.34331	4.98086	5.87282	6.4761	2.40896	3.09686
cluster2	AT4G22690	Carubv10007287	CARHR229620	Thhalv10024914	2.84827	2.59114	3.35632	2.92381	4.55616	3.64241	3.94633	6.31517	3.45459
cluster2	AT4G23190	Carubv10004309	CARHR230300	Thhalv10024606	4.70628	4.37708	3.89312	3.5921	4.10942	4.44696	6.20121	4.47047	2.92669
cluster2	AT4G23810	Carubv10006884	CARHR231200	Thhalv10025724	4.51505	3.81162	3.8496	3.82003	4.28436	5.00385	6.64757	4.91167	3.17464
cluster2	AT4G24310	Carubv10007137	CARHR231730	Thhalv10026158	2.39992	2.663	2.18477	2.56841	3.92552	3.15668	7.39539	4.7986	4.75744
cluster2	AT4G25350	Carubv10004221	CARHR232760	Thhalv10024522	4.37146	4.07136	3.04847	3.03634	4.50185	3.73887	4.9615	2.8702	1.89528
cluster2	AT4G26200	Carubv10006315	CARHR233740	Thhalv10027427	4.20869	3.2075	2.5374	3.91485	3.45989	3.94079	6.90711	0.647304	1.13254
cluster2	AT4G28350	Carubv10004287	CARHR236050	Thhalv10027026	4.60302	4.72651	4.56799	4.09107	5.58886	5.49441	4.79737	4.57615	6.31388
cluster2	AT4G28420	Carubv10004785	CARHR236190	Thhalv10025166	6.56787	5.63036	4.34537	2.87748	6.71128	2.43951	7.54305	2.41717	5.25858
cluster2	AT4G30210	Carubv10004254	CARHR238120	Thhalv10024546	3.35117	3.96962	3.54083	2.77659	4.3628	4.14272	4.75638	3.47103	3.58455
cluster2	AT4G31550	Carubv10005215	CARHR239430	Thhalv10025646	3.08968	4.1961	3.59306	3.05325	4.39409	4.35649	5.78109	2.75119	3.21699
cluster2	AT4G33050	Carubv10004685	CARHR241060	Thhalv10025033	4.38036	4.38454	3.66903	3.27059	4.09306	4.54213	4.4445	4.22279	4.34952
cluster2	AT4G35110	Carubv10005011	CARHR243390	Thhalv10025438	3.81173	4.1994	3.4622	2.97824	4.45677	4.09004	3.22279	3.63337	4.73226
cluster2	AT4G35180	Carubv10004720	CARHR243500	Thhalv10025079	5.03567	4.92475	4.41927	3.74253	4.30697	5.97907	3.8036	3.42698	4.81013
cluster2	AT4G36500	Carubv10006040	CARHR244820	Thhalv10026576	3.38175	3.97943	4.37624	3.51828	4.58524	5.36156	8.73262	3.27199	5.75596
cluster2	AT4G36950	Carubv10007712	CARHR245550	Thhalv10027234	3.37989	2.68214	4.5438	2.6052	4.46213	2.02614	4.63108	5.56502	7.86569
cluster2	AT4G37370	Carubv10004642	CARHR245750	Thhalv10024985	5.1072	4.34542	3.32863	3.17132	4.67558	5.55938	3.68169	5.51224	4.73334
cluster2	AT4G37390	Carubv10004412	CARHR245770	Thhalv10024716	1.81948	4.03707	2.40327	1.44977	4.5086	2.05582	3.88666	4.43491	7.11193
cluster2	AT4G37640	Carubv10004056	CARHR246020	Thhalv10024301	3.50317	4.33345	3.02269	2.73552	3.71632	3.91814	4.3073	2.78943	2.69519
cluster2	AT4G39230	Carubv10005315	CARHR247470	Thhalv10025805	2.56014	3.43786	3.37731	2.63644	3.97445	3.98652	4.06468	3.43699	2.8248
cluster2	AT4G39670	Carubv10005624	CARHR247060	Thhalv10026153	4.78948	4.75105	4.06844	2.82627	4.67424	5.49826	6.2023	5.53072	-0.875138
cluster2	AT4G40020	Carubv10004384	CARHR246650	Thhalv10027577	4.76502	5.65256	4.76946	3.40374	5.42774	5.86372	8.16486	3.84298	2.40257
cluster2	AT5G01100	Carubv10000446	CARHR211420	Thhalv10012957	5.05916	4.70715	4.04226	3.16537	4.98423	5.32142	4.88555	4.58579	2.76432
cluster2	AT5G01550	Carubv10000349	CARHR211910	Thhalv10012840	6.33098	5.13682	3.94026	4.7668	6.07074	5.58185	5.02117	4.95155	4.10345
cluster2	AT5G05190	Carubv10003100	CARHR208070	Thhalv10013098	4.07882	3.41665	2.58813	3.32746	3.45967	3.64793	4.53336	3.29952	2.73265
cluster2	AT5G06320	Carubv10003629	CARHR207060	Thhalv10014557	2.82832	3.11625	2.99905	3.05498	3.41416	3.89539	2.992	4.32062	3.42115
cluster2	AT5G09876	Carubv10002293	CARHR203470	Thhalv10023850	5.08679	2.51121	3.28119	3.05575	5.72259	5.98836	5.45232	6.06753	2.15127
cluster2	AT5G11670	Carubv10003832	CARHR201550	Thhalv10013057	3.57732	3.45982	2.842	2.63964	3.48885	3.75281	3.18085	2.67727	4.21738
cluster2	AT5G12340	Carubv10003684	CARHR200770	Thhalv10015959	2.74538	3.45068	3.42813	2.28326	4.68058	4.29373	4.44205	2.67227	4.86679
cluster2	AT5G14700	Carubv10001213	CARHR198610	Thhalv10013866	4.36595	4.74639	4.82383	2.97887	6.55757	5.50163	5.21488	3.61343	2.87807
cluster2	AT5G15870	Carubv10000292	CARHR197440	Thhalv10012764	3.13388	3.23431	2.536	3.04294	3.54744	4.09014	4.21364	2.99467	3.93011
cluster2	AT5G17350	Carubv10002057	CARHR195860	Thhalv10014832	3.86666	2.85623	2.9498	2.71448	4.22622	4.26893	4.75081	3.05893	2.60993
cluster2	AT5G19880	Carubv10002844	CARHR192980	Thhalv10014083	4.67688	3.6178	3.3882	2.71891	5.08633	4.8372	1.73205	5.55853	2.08072
cluster2	AT5G20230	Carubv10001991	CARHR192600	Thhalv10014739	4.41692	3.6888	3.94929	3.13227	3.63037	4.32341	4.19218	4.99867	2.85353
cluster2	AT5G22250	Carubv10002891	CARHR191310	Thhalv10014297	2.64298	3.89481	3.78121	2.58071	4.30936	4.7661	3.45923	2.74092	3.26375
cluster2	AT5G22540	Carubv10000882	CARHR191020	Thhalv10013261	5.77635	4.18749	3.27556	1.37499	3.14304	2.85803	5.02251	2.9335	4.70918
cluster2	AT5G22545	Carubv10003337	CARHR191010	Thhalv10015096	2.6304	4.15677	1.48717	2.31138	1.16801	2.23506	6.62808	4.78237	6.41834
cluster2	AT5G24550	Carubv10003612	CARHR139640	Thhalv10001744	4.85228	2.39615	2.57759	0.312789	3.87183	3.93065	11.7964	-0.0173415	0.338165
cluster2	AT5G25260	Carubv10003046	CARHR188240	Thhalv10004164	4.45025	5.25489	3.06144	3.27207	4.00853	2.36982	3.34413	4.04857	4.54297
cluster2	AT5G25930	Carubv10000132	CARHR187510	Thhalv10003585	4.1406	3.91737	3.55078	2.82111	3.48189	4.24338	3.81949	2.45813	3.11871
cluster2	AT5G28646	Carubv10002005	CARHR185260	Thhalv10005603	2.85462	3.79937	3.44255	1.88478	4.22348	4.4195	9.63473	2.88206	3.29637
cluster2	AT5G40000	Carubv10006799	CARHR262100	Thhalv10028293	5.71824	6.33644	5.06836	2.60681	4.44503	4.01925	5.77808	1.51491	3.25248
cluster2	AT5G41680	Carubv10005208	CARHR272980	Thhalv10028151	4.11955	4.928	3.57676	3.84859	6.25475	5.71078	5.85267	2.21811	0.341528
cluster2	AT5G42380	Carubv10028385	CARHR285070	Thhalv10003430	3.69592	3.19201	3.41209	1.74262	3.08991	4.7955	6.28835	6.04032	4.8251
cluster2	AT5G43420	Carubv10028453	CARHR180180	Thhalv10003389	2.99304	3.4418	3.38721	2.81881	3.76499	3.818	4.73579	3.39003	1.55811
cluster2	AT5G46080	Carubv10026769	CARHR175850	Thhalv10000955	3.27137	4.32011	4.04714	3.812	5.24145	4.93307	5.2273	3.53516	2.95221
cluster2	AT5G46350	Carubv10026746	CARHR175450	Thhalv10001240	4.28083	3.98331	2.14914	4.04706	4.47411	2.9758	4.02546	5.04256	4.11901
cluster2	AT5G47910	Carubv10007974	CARHR284360	Thhalv10003619	2.78354	3.76444	3.74691	2.71825	4.01644	4.35801	3.60319	3.29135	3.30034
cluster2	AT5G48410	Carubv10025869	CARHR183770	Thhalv10003642	3.2195	4.66549	3.5491	3.2539	4.12778	3.1599	5.82585	3.08214	4.09375
cluster2	AT5G48540	Carubv10026967	CARHR183490	Thhalv10005717	3.85706	2.91153	4.11426	3.23966	4.19389	4.38556	3.80228	3.56169	4.78808
cluster2	AT5G48657	Carubv10027111	CARHR183260	Thhalv10004864	3.71747	3.47784	3.26087	3.37011	3.8417	4.89979	5.29202	2.15064	4.66859
cluster2	AT5G52050	Carubv10026248	CARHR264990	Thhalv10015455	1.86293	2.63653	2.27119	2.41075	2.73042	2.26635	7.48149	4.71238	6.483
cluster2	AT5G55090	Carubv10026284	CARHR268430	Thhalv10015237	5.016	4.10439	3.50044	4.10321	5.00727	4.2458	4.90661	1.91978	2.77826
cluster2	AT5G57010	Carubv10026276	CARHR270750	Thhalv10015693	4.11874	5.28697	4.79884	3.97808	4.6601	5.17701	4.3559	4.31169	2.89582
cluster2	AT5G57190	Carubv10026079	CARHR270980	Thhalv10012950	3.64618	3.81096	3.20752	2.9622	5.0063	4.00429	4.58309	5.21786	5.4645
cluster2	AT5G57510	Carubv10027367	CARHR271290	Thhalv10015454	5.42714	4.03155	3.57655	2.07739	4.53939	5.23738	4.96873	6.00863	4.71515
cluster2	AT5G59730	Carubv10028285	CARHR273310	Thhalv10016083	2.23693	3.598	3.68229	2.979	4.55515	4.37953	4.09498	2.46589	4.95387
cluster2	AT5G61560	Carubv10025907	CARHR275330	Thhalv10003692	3.65242	4.72784	3.31214	2.98745	3.94275	4.56992	3.79844	3.0993	2.84144
cluster2	AT5G62150	Carubv10027425	CARHR275920	Thhalv10005374	3.77917	4.9647	4.87942	4.02897	5.7885	5.98796	6.19995	1.84545	6.85009
cluster2	AT5G63130	Carubv10027182	CARHR276960	Thhalv10004971	2.74424	2.69485	2.78686	2.20896	3.6514	4.10302	4.95994	3.06961	4.41918
cluster2	AT5G64660	Carubv10027914	CARHR278630	Thhalv10004299	3.51456	3.88268	3.97043	2.89128	5.08642	5.28857	4.44819	2.19747	3.90154
cluster2	AT5G64750	Carubv10026540	CARHR278740	Thhalv10004333	4.41871	2.18732	2.79061	2.16645	3.08979	4.52818	6.44306	3.92383	5.72218
cluster2	AT5G66790	Carubv10026084	CARHR280910	Thhalv10003840	3.22272	3.72508	3.39633	3.07776	3.388	4.34923	3.66061	3.09363	3.35376
cluster2	AT5G67080	Carubv10028563	CARHR280570	Thhalv10004510	3.92868	5.02878	5.3569	3.07976	5.9517	6.40479	5.6694	3.7022	4.30291
cluster2	AT5G67340	Carubv10025974	CARHR280270	Thhalv10003745	4.21314	4.77768	3.69332	3.05521	4.83698	4.31874	3.04987	4.0354	2.93217
cluster3_black_Brass	AT1G01570	Carubv10008901	CARHR000790	Thhalv10007848	0.417313	-0.0340176	0.158468	0.455796	0.820503	0.516111	2.51709	0.716648	3.57083
cluster3_black_Brass	AT1G05310	Carubv10011085	CARHR004800	Thhalv10009800	1.05617	0.133191	-0.0373556	0.220673	-0.24791	-0.198564	4.72299	2.05346	0.128913
cluster3_black_Brass	AT1G05680	Carubv10009096	CARHR005200	Thhalv10007603	1.2992	-0.0369974	-0.165034	-0.487292	0.38831	0.332692	3.01368	2.15418	3.15835
cluster3_black_Brass	AT1G05700	Carubv10011047	CARHR054170	Thhalv10006777	1.39777	1.06993	1.09893	-0.127124	0.741728	1.54574	3.29806	1.2007	1.42664
cluster3_black_Brass	AT1G05894	Carubv10011325	CARHR005430	Thhalv10009329	0.430887	0.607359	-0.413646	-0.17734	1.30099	-1.69038	4.28793	0.572477	0.0720814
cluster3_black_Brass	AT1G09155	Carubv10009939	CARHR009080	Thhalv10008383	-0.262835	0.457369	0.0992373	0.483602	-0.622511	-0.53321	5.65577	5.83085	4.30694
cluster3_black_Brass	AT1G09490	Carubv10009753	CARHR222090	Thhalv10008138	-0.349255	-0.173215	-0.0821241	-0.15889	0.182198	-0.219437	4.89589	1.13069	-0.267357
cluster3_black_Brass	AT1G12740	Carubv10020186	CARHR013030	Thhalv10007534	0.704833	1.11476	0.615653	0.399753	1.52138	1.7817	5.20445	1.48153	-0.765559
cluster3_black_Brass	AT1G15385	Carubv10012662	CARHR015920	Thhalv10009244	1.03267	0.86842	1.09038	0.358092	0.864205	1.71973	4.38808	2.30025	1.78155
cluster3_black_Brass	AT1G15460	Carubv10011515	CARHR016010	Thhalv10007002	0.109167	-0.0416962	-0.300706	-0.384854	1.67804	0.152934	2.1978	1.4375	2.48741
cluster3_black_Brass	AT1G19610	Carubv10010796	CARHR247530	Thhalv10009242	0.713676	0.768184	1.01288	1.7626	1.38655	1.53566	3.92149	0.0500924	1.22035
cluster3_black_Brass	AT1G21590	Carubv10011454	CARHR021950	Thhalv10006893	0.839769	1.13909	0.822728	0.209377	0.527723	1.01055	2.92933	1.47272	1.74146
cluster3_black_Brass	AT1G22360	Carubv10008992	CARHR022720	Thhalv10007499	1.1596	0.73035	0.865279	1.45116	1.17701	1.43791	3.72542	2.32194	0.702856
cluster3_black_Brass	AT1G30900	Carubv10008569	CARHR030390	Thhalv10007059	1.49865	1.23879	0.59124	0.328138	0.776533	0.232336	2.44071	1.28798	1.56535
cluster3_black_Brass	AT1G32180	Carubv10011620	CARHR031550	Thhalv10006703	0.985205	-0.585391	1.927	0.527884	0.784949	0.997417	7.84351	-1.03941	1.61838
cluster3_black_Brass	AT1G34320	Carubv10008536	CARHR033780	Thhalv10007023	0.929573	0.936107	0.71205	0.411531	0.980685	0.370721	1.99785	2.6493	1.43016
cluster3_black_Brass	AT1G52720	Carubv10010650	CARHR042860	Thhalv10012366	-0.151816	0.138724	0.404798	0.492558	0.35472	0.630224	3.89156	1.06604	1.50209
cluster3_black_Brass	AT1G58190	Carubv10021433	CARHR053860	Thhalv10023377	1.02989	0.763759	0.82918	0.830757	0.938984	1.18619	4.56977	0.49982	1.48444
cluster3_black_Brass	AT1G59850	Carubv10021851	CARHR053240	Thhalv10023992	1.17891	1.35866	0.706568	0.183353	-0.0743676	-1.0938	2.57	1.57046	0.424872
cluster3_black_Brass	AT1G64405	Carubv10021166	CARHR046510	Thhalv10023875	-1.24889	0.434715	0.431356	0.325087	0.853562	0.97103	2.92625	1.13264	0.435
cluster3_black_Brass	AT1G67480	Carubv10020480	CARHR060030	Thhalv10018729	0.429536	0.346148	0.512513	0.585862	0.288513	0.296876	2.5897	1.38527	0.58756
cluster3_black_Brass	AT1G67880	Carubv10020435	CARHR060530	Thhalv10018686	-0.011355	0.35986	0.370866	0.513601	0.599731	0.322241	3.01683	2.60181	0.81054
cluster3_black_Brass	AT1G69790	Carubv10020215	CARHR062860	Thhalv10018676	0.954921	0.925326	0.490781	0.35432	0.276829	0.517292	2.15482	3.28614	1.1706
cluster3_black_Brass	AT1G69990	Carubv10021437	CARHR063090	Thhalv10018330	1.3674	0.034955	-0.483627	1.31678	-0.942694	-1.751	3.34744	1.08278	0.718529
cluster3_black_Brass	AT1G70250	Carubv10022795	CARHR138710	Thhalv10016373	0.371787	0.700394	0.193761	0.0628941	0.184763	0.163298	4.16562	5.38817	1.27966
cluster3_black_Brass	AT1G72890	Carubv10020305	CARHR065880	Thhalv10018571	-0.489785	-0.660467	-0.663034	-1.0346	0.090033	-1.17338	4.32926	0.866325	1.32475
cluster3_black_Brass	AT1G72950	Carubv10025426	CARHR065890	Thhalv10018617	0.20342	1.2874	1.01659	0.622117	1.466	0.375196	3.40973	-0.0630923	0.954848
cluster3_black_Brass	AT1G76640	Carubv10021626	CARHR070200	Thhalv10019832	0.599702	-0.0221676	0.389693	0.282288	1.42537	0.343506	4.48224	-0.213562	0.500931
cluster3_black_Brass	AT1G77380	Carubv10021374	CARHR070860	Thhalv10018484	1.03431	0.269643	0.21859	0.0700925	0.381895	-0.111051	2.41061	0.660892	2.32081
cluster3_black_Brass	AT1G78120	Carubv10020129	CARHR071580	Thhalv10018402	0.350193	0.686754	0.545727	0.0111301	0.495614	0.424913	4.07454	0.696498	0.555832
cluster3_black_Brass	AT1G79450	Carubv10020558	CARHR073110	Thhalv10018802	0.968195	0.928325	0.97387	0.413548	1.288	0.879022	6.56457	-0.937066	1.92507
cluster3_black_Brass	AT2G01300	Carubv10019439	CARHR143830	Thhalv10001173	1.53306	0.0443111	0.177392	0.203448	1.45467	1.38325	5.72815	2.47389	1.39059
cluster3_black_Brass	AT2G03760	Carubv10018897	CARHR146510	Thhalv10004585	0.984801	0.56512	-0.110718	0.335035	0.489161	0.79535	2.02911	2.0015	1.52524
cluster3_black_Brass	AT2G15220	Carubv10016469	CARHR105610	Thhalv10022957	1.77025	0.51559	0.625059	1.21778	0.664236	1.23792	4.27387	1.60229	0.835422
cluster3_black_Brass	AT2G22860	Carubv10024420	CARHR114180	Thhalv10000381	1.31294	1.00646	1.01934	0.704719	1.68737	1.01472	4.50959	1.32328	3.40141
cluster3_black_Brass	AT2G23960	Carubv10006985	CARHR184650	Thhalv10000299	2.78681	0.327886	0.299428	0.625482	1.05587	0.497996	3.80279	0.410493	4.66586
cluster3_black_Brass	AT2G28650	Carubv10022905	CARHR121760	Thhalv10017781	0.755627	-0.145281	-0.532463	0.784883	0.879018	-1.02421	4.40257	3.84896	3.50254
cluster3_black_Brass	AT2G28990	Carubv10024714	CARHR122160	Thhalv10016220	1.2584	-0.604462	-0.0896936	0.460128	0.40505	0.469096	2.5956	1.39585	1.55307
cluster3_black_Brass	AT2G30270	Carubv10024138	CARHR123590	Thhalv10017277	0.165523	0.115827	0.649917	-0.086156	-0.457887	0.547565	2.44304	1.58383	1.99268
cluster3_black_Brass	AT2G31200	Carubv10024267	CARHR124800	Thhalv10017380	0.47876	0.233219	0.706932	0.665123	0.630656	1.0774	2.69828	0.791508	0.988668
cluster3_black_Brass	AT2G35580	Carubv10023384	CARHR129760	Thhalv10017598	0.477397	0.470433	0.432595	0.312789	0.876518	1.44621	3.42088	-0.924666	0.705224
cluster3_black_Brass	AT2G37440	Carubv10023097	CARHR132150	Thhalv10016662	0.125122	1.10533	0.612974	1.0993	0.214045	0.281523	2.44651	1.80063	0.69902
cluster3_black_Brass	AT2G37820	Carubv10025020	CARHR131730	Thhalv10017859	0.613288	0.306856	0.706555	0.999362	0.823765	1.504	3.04513	3.19198	1.13905
cluster3_black_Brass	AT2G38480	Carubv10024123	CARHR133170	Thhalv10017282	-0.747147	-0.715183	-0.482229	-0.124077	-0.314203	-0.305362	3.20463	1.87238	1.08997
cluster3_black_Brass	AT2G40113	Carubv10024190	CARHR135090	Thhalv10017342	1.35606	0.579189	0.167074	1.06745	1.31836	0.392244	2.82714	2.10231	1.70237
cluster3_black_Brass	AT2G40520	Carubv10022828	CARHR135630	Thhalv10016509	-0.0246244	-0.121556	-0.325491	-0.0856309	-0.294729	-0.119491	2.78702	1.7013	0.791539
cluster3_black_Brass	AT2G41180	Carubv10024274	CARHR136270	Thhalv10017346	0.12881	-0.956173	0.203328	0.2236	-0.630868	-0.279784	3.40938	2.00886	0.795245
cluster3_black_Brass	AT2G41640	Carubv10023085	CARHR136730	Thhalv10016562	0.473705	0.961573	0.358934	0.0679004	-0.474974	-0.151906	2.69595	2.42828	1.85276
cluster3_black_Brass	AT2G46750	Carubv10022855	CARHR142070	Thhalv10002773	1.41755	1.0631	0.570186	0.268735	0.992445	0.782142	4.02603	2.51206	1.39364
cluster3_black_Brass	AT2G46760	Carubv10022850	CARHR142100	Thhalv10001364	0.279572	0.829184	0.79166	-0.150641	0.402049	0.43363	5.30302	-0.0468506	0.395697
cluster3_black_Brass	AT3G01420	Carubv10013184	CARHR075550	Thhalv10020279	0.918066	0.539921	0.365412	-0.0115183	0.464879	0.330191	3.39742	2.80481	3.31944
cluster3_black_Brass	AT3G04010	Carubv10013538	CARHR078140	Thhalv10020592	0.662304	0.52546	0.293663	0.379494	0.581201	0.331342	4.33057	0.777142	1.72773
cluster3_black_Brass	AT3G04620	Carubv10015288	CARHR078830	Thhalv10021676	-0.0331254	0.871559	0.0820073	0.14082	0.957225	0.671176	3.03042	0.440571	1.84955
cluster3_black_Brass	AT3G06490	Carubv10014195	CARHR081020	Thhalv10021126	0.145495	0.995697	0.958117	-0.12803	1.38293	1.95752	3.63574	1.70243	3.09311
cluster3_black_Brass	AT3G07970	Carubv10015662	CARHR082710	Thhalv10020758	2.21907	-1.01528	0.477082	-0.807802	0.98412	1.3077	3.22316	1.46172	0.536864
cluster3_black_Brass	AT3G14460	Carubv10015458	CARHR089300	Thhalv10011185	0.832247	-0.0667576	0.461023	0.81817	-0.416961	0.512451	2.68353	2.57235	0.26206
cluster3_black_Brass	AT3G14630	Carubv10015601	CARHR095630	Thhalv10021962	2.51344	-1.29879	1.07427	0.394045	-0.957099	0.997417	4.01445	0.793712	0.0419761
cluster3_black_Brass	AT3G15352	Carubv10015304	CARHR090370	Thhalv10021884	0.30783	0.212426	0.564812	0.759167	0.68696	0.983742	3.14996	1.68853	1.80087
cluster3_black_Brass	AT3G25597	Carubv10018146	CARHR146570	Thhalv10005058	0.746624	1.31495	0.578947	1.29612	1.21409	1.12465	3.24509	1.17083	0.945016
cluster3_black_Brass	AT3G25770	Carubv10017888	CARHR146670	Thhalv10004824	0.467854	0.900733	0.36667	0.510359	1.5304	0.496514	4.84154	1.47347	6.55531
cluster3_black_Brass	AT3G42180	Carubv10008022	CARHR153630	Thhalv10002345	1.55218	1.33765	1.14655	0.510029	1.41649	1.5319	3.8891	0.680449	1.25139
cluster3_black_Brass	AT3G45410	Carubv10018475	CARHR150350	Thhalv10002842	-0.214373	0.707675	0.348004	0.589619	0.575242	0.372858	3.75242	-0.0905263	1.0802
cluster3_black_Brass	AT3G46880	Carubv10018666	CARHR155500	Thhalv10010907	-1.23765	-0.215637	0.00420764	0.859558	0.297708	0.96572	3.99112	0.437229	0.553941
cluster3_black_Brass	AT3G50310	Carubv10018782	CARHR159780	Thhalv10010509	0.475865	-0.338272	-0.921164	0.177535	-0.351501	-0.249619	3.94739	1.68627	1.51655
cluster3_black_Brass	AT3G53820	Carubv10019596	CARHR163750	Thhalv10010804	0.384158	1.25337	1.57419	1.54035	0.907071	-0.597898	2.97802	2.45645	0.13835
cluster3_black_Brass	AT3G55880	Carubv10018007	CARHR165980	Thhalv10010703	0.651241	0.453709	0.601989	0.629456	0.969415	0.555484	2.11426	1.64602	1.80913
cluster3_black_Brass	AT3G55890	Carubv10018247	CARHR165990	Thhalv10010822	0.487579	0.576117	0.613331	0.219658	0.81385	0.799674	2.83818	2.58965	0.338165
cluster3_black_Brass	AT3G57380	Carubv10017113	CARHR167570	Thhalv10005928	1.18048	0.682241	1.41285	0.719951	0.491988	1.04498	4.02548	0.939906	2.56648
cluster3_black_Brass	AT3G59710	Carubv10019270	CARHR170080	Thhalv10006128	0.35484	0.232179	0.138326	-0.459274	-0.330449	-0.645555	5.36251	0.122019	0.0290852
cluster3_black_Brass	AT3G62280	Carubv10018750	CARHR172620	Thhalv10006046	0.929544	1.15612	1.39791	1.19546	1.22258	2.34239	6.47271	0.988495	1.94723
cluster3_black_Brass	AT4G04720	Carubv10003219	CARHR252820	Thhalv10028567	0.40481	0.656249	0.217784	0.0351614	0.0999368	0.100881	3.17485	1.86405	1.32993
cluster3_black_Brass	AT4G11530	Carubv10003321	CARHR254870	Thhalv10028491	0.789555	0.950711	0.950253	-0.587043	0.601633	0.933613	8.48738	0.707578	0.231041
cluster3_black_Brass	AT4G13420	Carubv10006871	CARHR219060	Thhalv10024742	0.567474	0.626392	0.683279	0.735665	0.349927	0.409221	1.90553	1.34352	2.42227
cluster3_black_Brass	AT4G15760	Carubv10004937	CARHR290240	Thhalv10025403	0.591888	0.603093	0.204684	0.446542	0.101215	0.027327	4.23006	2.61219	2.4402
cluster3_black_Brass	AT4G17895	Carubv10004260	CARHR224620	Thhalv10024586	1.05835	1.23642	0.765679	0.516591	0.853058	0.78533	2.53476	1.02254	1.97432
cluster3_black_Brass	AT4G18910	Carubv10005388	CARHR225790	Thhalv10025855	0.702812	0.282883	0.853527	0.780331	0.839867	1.05611	3.07359	0.635898	4.23582
cluster3_black_Brass	AT4G19810	Carubv10005044	CARHR226580	Thhalv10025464	0.962706	1.23259	0.373926	1.00742	0.845451	0.711991	3.17766	1.37636	1.52935
cluster3_black_Brass	AT4G20110	Carubv10004337	CARHR226950	Thhalv10024676	1.02021	0.973299	0.275399	0.0738594	0.58636	0.344957	2.14387	2.13705	3.32966
cluster3_black_Brass	AT4G20770	Carubv10007408	CARHR227310	Thhalv10024457	1.44693	-0.503022	-1.00087	-0.684629	1.14228	1.14627	3.55529	-0.35627	0.658775
cluster3_black_Brass	AT4G21440	Carubv10004873	CARHR228110	Thhalv10027571	1.46327	0.155758	0.432595	1.89459	1.05936	-0.292994	2.92441	1.65877	4.65355
cluster3_black_Brass	AT4G22590	Carubv10005056	CARHR229480	Thhalv10025482	-0.0509235	-0.0578883	0.432595	0.312789	0.348197	0.469096	2.23601	2.99628	2.01883
cluster3_black_Brass	AT4G23060	Carubv10004684	CARHR230120	Thhalv10025012	0.487905	0.976663	0.511668	-0.308884	-0.352488	0.385213	2.27525	0.95046	1.71783
cluster3_black_Brass	AT4G23130	Carubv10004324	CARHR230230	Thhalv10024603	2.31439	-0.121959	1.11323	1.68114	-0.121358	0.932677	3.35571	0.182036	2.27586
cluster3_black_Brass	AT4G23290	Carubv10006289	CARHR230630	Thhalv10024670	-0.220134	-0.6557	-1.00959	-0.90626	-1.28806	-1.29259	5.4082	-1.22933	4.09596
cluster3_black_Brass	AT4G23515	Carubv10006966	CARHR230850	Thhalv10026755	0.428879	1.82704	-0.286017	0.154112	1.70764	1.36124	3.63026	1.97676	0.12021
cluster3_black_Brass	AT4G23580	Carubv10007270	CARHR083760	Thhalv10002581	-0.0509235	-0.0578883	0.432595	0.312789	0.348197	0.469096	4.8525	-0.0173415	0.065788
cluster3_black_Brass	AT4G23730	Carubv10005322	CARHR231120	Thhalv10025817	0.399527	0.2423	0.204414	-0.0890111	-0.218272	0.382961	2.23116	2.37017	2.94159
cluster3_black_Brass	AT4G23920	Carubv10005157	CARHR231340	Thhalv10025610	0.224659	0.36557	0.773691	0.367149	0.701011	0.899871	3.46778	1.22976	1.44485
cluster3_black_Brass	AT4G25300	Carubv10020553	CARHR216970	Thhalv10025577	-0.174668	-0.0751597	0.0491688	-0.116628	1.29263	0.125066	2.92618	-0.396445	2.97074
cluster3_black_Brass	AT4G26050	Carubv10005024	CARHR233550	Thhalv10025419	1.65869	0.493185	1.34928	0.0813519	1.52047	1.30371	4.95172	0.736233	0.505884
cluster3_black_Brass	AT4G26270	Carubv10006975	CARHR233820	Thhalv10025029	1.30668	1.13992	0.175699	0.352163	0.841498	0.00341324	4.29884	0.670428	1.64153
cluster3_black_Brass	AT4G26890	Carubv10004778	CARHR234500	Thhalv10027219	0.596857	0.551046	0.21229	0.885698	0.453095	0.430646	3.71683	5.43408	3.19923
cluster3_black_Brass	AT4G27190	Carubv10006587	CARHR234850	Thhalv10024315	1.02912	-0.0578883	0.432595	0.312789	0.348197	-0.294022	4.16679	1.01463	4.55704
cluster3_black_Brass	AT4G27350	Carubv10005286	CARHR235000	Thhalv10025946	0.678317	0.684434	1.16534	1.20456	1.36432	1.33587	3.48209	2.74372	0.963221
cluster3_black_Brass	AT4G28330	Carubv10005924	CARHR236040	Thhalv10026455	-0.344067	-0.936502	-0.259551	-0.1938	-0.6902	-0.519123	2.87499	1.50265	2.06749
cluster3_black_Brass	AT4G32870	Carubv10007152	CARHR240870	Thhalv10026440	0.990821	0.808577	1.09447	1.20929	1.61779	1.3949	3.6594	1.0793	1.01084
cluster3_black_Brass	AT4G36990	Carubv10005408	CARHR245510	Thhalv10025906	-0.0509235	-0.0578883	0.432595	0.312789	0.348197	0.469096	2.09561	2.35825	2.73612
cluster3_black_Brass	AT4G39980	Carubv10004581	CARHR246700	Thhalv10024923	1.17225	0.566369	1.03585	0.27708	1.65156	1.18719	2.80298	1.04493	1.78782
cluster3_black_Brass	AT5G03620	Carubv10003361	CARHR209680	Thhalv10015584	0.63262	0.132013	0.432595	1.80239	0.348197	0.997417	5.37009	-0.0173415	2.70061
cluster3_black_Brass	AT5G04200	Carubv10001449	CARHR209060	Thhalv10014106	1.4268	0.566571	0.376806	0.224177	0.7174	0.437609	3.16128	0.694682	0.370586
cluster3_black_Brass	AT5G10990	Carubv10002201	CARHR202300	Thhalv10015745	-0.722427	0.191101	-0.458066	0.267201	0.335428	0.262089	4.46015	-0.237763	3.28229
cluster3_black_Brass	AT5G13210	Carubv10000406	CARHR200260	Thhalv10012951	0.955973	0.781684	0.0165759	0.127445	0.636225	1.28048	3.17973	3.82665	2.562
cluster3_black_Brass	AT5G15490	Carubv10000855	CARHR197820	Thhalv10013414	0.796514	0.36872	0.111801	0.414514	0.157136	0.420267	2.49699	1.36068	1.28231
cluster3_black_Brass	AT5G17330	Carubv10000781	CARHR195890	Thhalv10013317	0.696545	1.08829	0.303434	0.355534	0.696513	0.400244	2.76919	0.25797	1.04617
cluster3_black_Brass	AT5G23950	Carubv10001693	CARHR189610	Thhalv10004867	-0.142502	1.49625	0.0684391	0.926325	0.327122	0.366656	2.14123	1.1356	2.2695
cluster3_black_Brass	AT5G26010	Carubv10003772	CARHR187270	Thhalv10004521	0.0513968	-0.350479	-0.431771	-0.0857112	0.0333345	-0.574624	2.65712	2.26928	0.66138
cluster3_black_Brass	AT5G26731	Carubv10002297	CARHR186980	Thhalv10005170	0.623044	0.200979	0.247461	0.902331	0.559551	0.920181	2.51901	0.549012	1.91927
cluster3_black_Brass	AT5G36260	Carubv10007473	CARHR216480	Thhalv10004115	0.335576	0.484823	-0.897501	0.281879	0.408648	0.724763	2.72965	3.43627	0.917955
cluster3_black_Brass	AT5G38910	Carubv10006688	CARHR263590	Thhalv10027920	0.890559	-0.0578883	0.432595	0.312789	-0.683737	-0.0592245	2.91932	5.2331	0.338165
cluster3_black_Brass	AT5G41590	Carubv10005685	CARHR287640	Thhalv10027919	0.0393128	0.555765	0.499463	0.179183	0.395357	0.658593	4.29832	0.930109	1.14781
cluster3_black_Brass	AT5G43570	Carubv10027471	CARHR180030	Thhalv10003303	1.05341	0.608521	1.45727	0.242504	2.2892	0.257808	10.2186	0.287206	1.87099
cluster3_black_Brass	AT5G43580	Carubv10027439	CARHR180000	Thhalv10003342	0.663458	0.985684	1.37799	0.194052	1.49005	0.56703	3.6131	2.63764	2.01956
cluster3_black_Brass	AT5G44390	Carubv10026190	CARHR178710	Thhalv10001137	1.28467	0.870537	0.878557	1.19578	0.697382	0.909647	5.74666	2.02416	2.6662
cluster3_black_Brass	AT5G44630	Carubv10028174	CARHR178290	Thhalv10001108	-0.579244	-0.0578883	0.432595	-0.215532	0.348197	0.469096	1.98649	3.13441	2.78654
cluster3_black_Brass	AT5G47740	Carubv10028591	CARHR173580	Thhalv10001004	0.367807	0.437512	0.62361	0.190711	1.05295	0.258817	2.3218	1.3829	1.41136
cluster3_black_Brass	AT5G49450	Carubv10027299	CARHR182100	Thhalv10005532	-0.0509235	-0.0578883	0.432595	0.312789	0.348197	0.469096	2.3164	1.30951	1.27931
cluster3_black_Brass	AT5G50450	Carubv10026771	CARHR257840	Thhalv10013738	0.0602526	0.501394	0.0527373	1.08965	0.476413	0.268131	2.40482	1.85906	1.37922
cluster3_black_Brass	AT5G51260	Carubv10026976	CARHR256770	Thhalv10014448	0.81388	0.2619	0.612066	0.920957	0.962365	0.837224	3.19674	0.549963	0.648648
cluster3_black_Brass	AT5G51570	Carubv10026824	CARHR264370	Thhalv10014263	0.558813	0.550781	0.6393	0.101829	0.847664	0.732281	2.97214	1.373	0.757448
cluster3_black_Brass	AT5G51680	Carubv10026727	CARHR264530	Thhalv10014011	0.472538	1.31981	0.560728	0.505108	1.21144	0.425146	4.11475	1.961	0.769814
cluster3_black_Brass	AT5G53590	Carubv10028027	CARHR266720	Thhalv10002918	-0.0509235	-0.0578883	0.432595	0.312789	0.348197	0.469096	2.49644	0.732113	1.75813
cluster3_black_Brass	AT5G62520	Carubv10027743	CARHR276300	Thhalv10004619	1.6736	0.17198	0.130601	0.879427	0.66157	0.813089	2.97822	1.94084	2.17989
cluster3_black_Brass	AT5G65160	Carubv10027509	CARHR279070	Thhalv10003869	0.0381216	0.248468	0.118917	0.382417	0.485793	0.589767	2.87358	1.20346	1.26717
cluster3_black_Brass	AT5G65500	Carubv10025893	CARHR279480	Thhalv10003671	1.43008	0.487793	0.273767	-0.389083	-0.41491	-2.24649	3.54254	1.77927	2.49153
cluster3_black_Brass	AT5G65690	Carubv10026025	CARHR279650	Thhalv10003764	2.15101	1.02844	0.749919	0.554116	1.8857	0.742271	7.0064	2.60955	1.84524
cluster3_black_Brass	AT5G65980	Carubv10028656	CARHR281780	Thhalv10005581	2.12613	1.34538	0.918489	0.650874	0.810143	-0.0854085	3.45912	1.27449	1.11262
cluster3_black_Brass	AT5G67430	Carubv10028507	CARHR280160	Thhalv10005629	-0.505953	1.32097	0.431565	1.3559	0.351493	0.677496	2.95063	2.78464	2.52783
cluster4	AT1G02450	Carubv10010607	CARHR001770	Thhalv10009031	3.80625	3.21484	1.15475	3.25741	2.51355	2.59863	0.978178	2.16081	1.02023
cluster4	AT1G03370	Carubv10008175	CARHR002750	Thhalv10000756	2.96879	3.2788	2.19687	2.07977	3.12093	3.03896	2.58245	2.32402	2.36989
cluster4	AT1G04100	Carubv10010148	CARHR003440	Thhalv10008519	2.29511	2.22083	2.72832	2.04937	3.24477	2.95071	2.0127	1.75201	0.216002
cluster4	AT1G09370	Carubv10010434	CARHR009330	Thhalv10009653	2.28289	2.7192	0.965913	1.1732	3.80506	4.19153	2.25	1.7519	0.353812
cluster4	AT1G09930	Carubv10011782	CARHR009980	Thhalv10009349	3.54673	3.90413	4.45994	1.95339	2.27193	3.86984	4.61607	1.52913	0.548132
cluster4	AT1G10040	Carubv10009269	CARHR010150	Thhalv10007805	2.78631	3.42388	2.9448	1.384	3.88511	3.93612	2.52795	0.964417	2.49454
cluster4	AT1G10417	Carubv10009270	CARHR010560	Thhalv10007877	2.83057	2.85437	2.81188	2.48864	4.33906	3.76922	1.2953	-0.391237	2.49774
cluster4	AT1G14260	Carubv10012202	CARHR014680	Thhalv10008459	2.87716	3.64964	2.67144	3.25723	4.21646	3.54721	4.56959	1.17061	0.32851
cluster4	AT1G14370	Carubv10009175	CARHR014810	Thhalv10007701	3.12441	3.6317	2.94382	2.83342	3.23284	3.82093	3.37597	2.0919	3.18674
cluster4	AT1G15190	Carubv10010136	CARHR015700	Thhalv10009974	3.45534	2.83216	2.29851	2.7463	3.94687	2.90379	2.33804	1.8668	1.22523
cluster4	AT1G15430	Carubv10010051	CARHR015990	Thhalv10008539	2.40423	3.14901	2.89333	2.43005	3.57807	3.93072	2.64517	2.12783	1.91284
cluster4	AT1G15540	Carubv10011635	CARHR016100	Thhalv10008198	3.49055	1.96148	3.5808	1.50694	4.26261	3.25989	3.74372	-0.492413	-0.0920657
cluster4	AT1G16290	Carubv10009260	CARHR016760	Thhalv10007775	0.473809	5.02119	3.60005	2.20157	5.08429	5.41052	1.14865	-0.431341	1.34832
cluster4	AT1G19180	Carubv10010018	CARHR019780	Thhalv10008419	2.92734	3.89477	3.40263	2.49636	4.28563	4.44608	2.76757	2.8134	3.18741
cluster4	AT1G19380	Carubv10010542	CARHR019970	Thhalv10008999	4.09813	3.4407	4.2659	3.78404	4.00626	5.2518	2.65098	2.8875	1.85238
cluster4	AT1G21010	Carubv10009886	CARHR021480	Thhalv10008766	2.35907	3.01108	2.9088	2.4349	3.37809	3.83157	1.50679	2.30546	3.43406
cluster4	AT1G25220	Carubv10009928	CARHR026340	Thhalv10008447	2.28118	3.05799	2.64937	1.94524	3.52268	3.53793	3.67982	0.362976	0.590318
cluster4	AT1G27770	Carubv10008156	CARHR027290	Thhalv10006664	1.87908	3.15456	2.0926	2.42104	2.76208	3.15978	2.07907	2.59391	1.79082
cluster4	AT1G28480	Carubv10010616	CARHR027970	Thhalv10009080	1.10402	2.53269	3.32574	2.82429	4.39089	4.27613	1.60899	1.27419	3.69147
cluster4	AT1G29690	Carubv10008721	CARHR029030	Thhalv10007234	2.51206	3.35146	3.03072	2.8946	3.60025	3.92876	3.47751	2.54346	2.36131
cluster4	AT1G30620	Carubv10023266	CARHR030100	Thhalv10007740	2.51712	3.13251	2.47156	2.15428	3.35599	3.34262	-0.0533067	2.28985	0.926173
cluster4	AT1G42990	Carubv10009864	CARHR035240	Thhalv10004635	2.20651	2.54541	2.75241	2.93034	3.75766	4.95321	2.49978	1.73531	0.630807
cluster4	AT1G44130	Carubv10010968	CARHR035820	Thhalv10011529	3.51033	4.5077	1.99049	3.39821	3.19952	3.11888	4.17928	3.03906	1.36608
cluster4	AT1G51660	Carubv10012397	CARHR041820	Thhalv10011588	2.42358	2.66472	2.57885	2.42973	3.30309	3.81304	4.04835	1.58151	1.16897
cluster4	AT1G51700	Carubv10011461	CARHR041860	Thhalv10011811	2.98248	2.77363	3.51986	3.19687	3.41363	4.096	2.73036	2.99277	1.68515
cluster4	AT1G53430	Carubv10012394	CARHR043660	Thhalv10011204	2.44601	3.45047	2.39299	1.58126	2.72768	2.78112	1.53372	1.63835	2.41706
cluster4	AT1G53990	Carubv10011675	CARHR044330	Thhalv10011584	2.95557	2.61505	3.84067	2.04046	3.49102	3.82411	1.61385	2.79627	2.57292
cluster4	AT1G61120	Carubv10019776	CARHR051570	Thhalv10023261	4.58671	3.66747	3.75611	2.86531	6.34662	5.48719	-0.436099	0.422034	4.75585
cluster4	AT1G61800	Carubv10020443	CARHR050530	Thhalv10023518	2.64802	2.19341	3.16361	1.38964	3.78724	4.72412	1.62971	1.64861	0.33151
cluster4	AT1G62420	Carubv10020728	CARHR049480	Thhalv10023929	2.98813	2.8054	2.64237	2.68063	5.27097	4.22937	2.26827	2.08412	4.38989
cluster4	AT1G64710	Carubv10022150	CARHR046190	Thhalv10023526	2.56129	2.4583	2.58283	2.86089	3.45152	3.14555	1.90045	1.54173	0.417668
cluster4	AT1G65240	Carubv10020224	CARHR056850	Thhalv10018479	3.94587	2.92514	3.88032	3.30593	3.79213	3.68046	3.3579	2.98729	1.07194
cluster4	AT1G66480	Carubv10020914	CARHR058500	Thhalv10019620	1.84914	3.31411	2.28911	2.83325	3.59538	3.79526	2.49179	1.98779	2.98857
cluster4	AT1G66780	Carubv10022179	CARHR058920	Thhalv10018422	2.73096	3.97464	2.94922	4.91265	3.85267	5.45537	3.799	0.857498	1.87019
cluster4	AT1G66880	Carubv10022151	CARHR059020	Thhalv10018045	3.18848	3.36188	2.73718	2.59595	2.99656	3.69336	2.21953	3.65436	2.86841
cluster4	AT1G67810	Carubv10021937	CARHR060440	Thhalv10018964	4.0091	2.99399	3.38177	2.94874	2.42588	5.1785	2.53317	1.67487	3.05124
cluster4	AT1G67856	Carubv10021695	CARHR060500	Thhalv10009051	1.51326	2.74231	2.77509	3.36184	4.06234	4.07491	1.42856	2.6673	0.125823
cluster4	AT1G68340	Carubv10020767	CARHR061050	Thhalv10018875	2.3231	2.64639	2.72888	2.19839	3.6922	3.23092	2.41284	2.7901	2.57976
cluster4	AT1G68390	Carubv10020398	CARHR061180	Thhalv10019817	4.33515	3.98253	3.25375	2.15228	3.92908	3.29815	0.747895	0.829282	3.30234
cluster4	AT1G70140	Carubv10019834	CARHR063230	Thhalv10018164	3.5838	3.44935	3.31277	2.86833	2.93479	3.62533	3.06936	2.75968	2.28686
cluster4	AT1G72280	Carubv10020240	CARHR065120	Thhalv10018491	2.88742	2.91683	3.06712	2.4772	3.75556	4.06795	2.3582	1.09794	1.49019
cluster4	AT1G73805	Carubv10020288	CARHR066870	Thhalv10018511	2.18682	3.81173	2.60874	2.3695	2.70423	3.15652	1.43491	3.43417	1.45273
cluster4	AT1G73810	Carubv10020289	CARHR066890	Thhalv10018603	3.78035	3.38079	3.65374	2.58732	3.57942	4.86358	2.95599	3.8983	1.87471
cluster4	AT1G75450	Carubv10020114	CARHR068850	Thhalv10018378	1.12735	3.12634	3.04061	2.42261	4.89421	3.65507	0.896686	-0.285203	0.716383
cluster4	AT1G76040	Carubv10020082	CARHR069570	Thhalv10018359	2.67349	2.56378	2.47377	1.72146	2.81258	2.92114	2.45066	0.392169	1.47398
cluster4	AT1G80450	Carubv10020938	CARHR074800	Thhalv10019207	2.12945	2.46051	2.8966	2.14489	3.29999	3.42209	2.21085	1.9816	1.66722
cluster4	AT2G20142	Carubv10014183	CARHR110660	Thhalv10002051	2.32923	2.23998	2.94695	2.07465	2.30871	3.66572	0.748712	1.32094	1.29686
cluster4	AT2G21910	Carubv10023041	CARHR112940	Thhalv10000679	0.964323	2.82932	4.79785	3.70917	4.43035	4.988	0.902507	-2.32604	0.934689
cluster4	AT2G23680	Carubv10023980	CARHR114690	Thhalv10000336	3.03623	2.72029	2.46695	2.54112	2.4327	4.11651	1.82652	3.1101	3.66758
cluster4	AT2G26190	Carubv10022981	CARHR114990	Thhalv10001975	1.84818	3.55078	2.03612	2.44101	3.24138	3.28379	2.46337	1.85541	2.48716
cluster4	AT2G27690	Carubv10023087	CARHR120320	Thhalv10016556	2.22726	1.67947	3.46308	2.6377	3.34619	3.6645	1.36512	0.48581	1.29732
cluster4	AT2G31230	Carubv10025229	CARHR124830	Thhalv10017149	1.39123	2.55199	3.07197	1.93314	3.22768	4.13551	1.69355	1.7499	2.55432
cluster4	AT2G32660	Carubv10025191	CARHR126520	Thhalv10016291	1.85306	2.67647	4.59569	2.39866	2.33409	1.84856	2.40739	1.27893	1.90357
cluster4	AT2G32680	Carubv10025247	CARHR127090	Thhalv10016223	4.70352	3.56716	3.04488	3.8827	3.06851	4.93165	0.189447	1.41668	0.861404
cluster4	AT2G33780	Carubv10025526	CARHR127880	Thhalv10017206	2.59564	4.7545	3.14417	4.0042	6.78001	3.81551	2.16001	-0.801973	2.88818
cluster4	AT2G34580	Carubv10025648	CARHR128670	Thhalv10017344	3.03773	5.11406	2.69262	1.901	4.80136	4.2922	-1.29242	0.419942	-0.704456
cluster4	AT2G36470	Carubv10023598	CARHR130770	Thhalv10016937	2.35918	2.8486	2.311	2.41847	3.14247	3.63961	1.20329	0.982968	1.72332
cluster4	AT2G37710	Carubv10024881	CARHR131810	Thhalv10016355	2.97876	2.42726	2.07166	3.42971	1.72584	2.47063	1.68963	2.07922	1.59623
cluster4	AT2G41280	Carubv10024716	CARHR136360	Thhalv10017768	2.38293	4.36989	4.02367	2.28003	3.91166	5.03486	1.57211	-0.0173415	0.157032
cluster4	AT2G41342	Carubv10024995	CARHR136460	Thhalv10017494	1.60516	3.27124	3.5151	2.12448	3.8533	3.45739	2.96466	2.09326	3.1235
cluster4	AT2G43120	Carubv10025017	CARHR138190	Thhalv10016961	2.68409	2.85456	2.54338	1.72721	2.70547	2.3019	1.92334	1.79628	1.32524
cluster4	AT2G43620	Carubv10023795	CARHR138790	Thhalv10001579	5.13637	3.47737	3.8731	3.6611	4.40687	5.53874	2.23157	2.0962	2.28873
cluster4	AT2G46400	Carubv10023578	CARHR141680	Thhalv10001568	2.77706	3.83487	3.30633	2.40286	3.4124	4.05414	2.02406	1.98364	1.25073
cluster4	AT2G46430	Carubv10022736	CARHR141710	Thhalv10001335	3.88189	3.04135	3.14917	2.4313	2.08797	3.20545	1.5137	3.33373	2.79499
cluster4	AT3G02550	Carubv10015363	CARHR076550	Thhalv10021328	1.20378	3.60044	2.94708	2.55468	4.41849	3.9658	1.79857	0.214314	1.51799
cluster4	AT3G05580	Carubv10014212	CARHR080010	Thhalv10021158	2.34755	2.84307	2.38376	2.25076	3.39792	3.18025	2.35193	2.59737	2.62079
cluster4	AT3G07390	Carubv10014508	CARHR082030	Thhalv10021367	2.69657	2.9794	2.97828	3.06399	3.63501	4.2033	1.16003	3.26274	1.38533
cluster4	AT3G09010	Carubv10013905	CARHR083350	Thhalv10020896	3.14868	3.6128	3.05921	2.19255	3.8481	4.12113	2.49856	1.73902	2.54324
cluster4	AT3G10720	Carubv10013273	CARHR085300	Thhalv10020324	3.04974	3.06791	2.4834	2.95983	3.53438	3.05136	2.37134	2.95478	1.67296
cluster4	AT3G13950	Carubv10016392	CARHR088760	Thhalv10022156	3.04331	3.12264	2.25724	2.90831	3.29622	3.97529	2.57058	3.92356	1.53001
cluster4	AT3G15500	Carubv10014211	CARHR090550	Thhalv10021174	1.49469	2.31857	2.52368	1.37437	3.38474	3.14893	0.540001	1.60539	3.02328
cluster4	AT3G17690	Carubv10015585	CARHR093040	Thhalv10020120	2.81063	4.44229	3.19141	2.5594	5.37259	3.87218	2.60395	2.30563	0.613362
cluster4	AT3G17700	Carubv10013007	CARHR093050	Thhalv10020123	2.1311	2.63784	2.33404	1.83414	3.17739	2.67807	2.36272	0.333691	1.80456
cluster4	AT3G18830	Carubv10013420	CARHR094250	Thhalv10020495	2.47047	2.83134	2.786	2.66975	2.94019	3.26096	3.20404	1.48589	2.3615
cluster4	AT3G19010	Carubv10014081	CARHR094430	Thhalv10021046	3.7748	3.55371	3.46771	3.37662	4.49491	4.4319	0.462271	1.09272	4.66277
cluster4	AT3G19260	Carubv10014281	CARHR094660	Thhalv10021239	2.65796	3.2453	2.63205	2.51041	2.96599	3.57315	2.75952	1.35432	0.832156
cluster4	AT3G21150	Carubv10015283	CARHR097010	Thhalv10021479	2.16752	2.84605	2.7518	2.58157	3.47979	3.76962	2.55723	-0.0173415	1.72579
cluster4	AT3G21230	Carubv10013305	CARHR097130	Thhalv10020406	3.20412	3.45191	2.35212	2.33138	3.52762	3.17158	0.214485	3.80111	0.225269
cluster4	AT3G21630	Carubv10016145	CARHR097600	Thhalv10020310	2.64222	3.23718	2.8834	2.48717	3.56781	2.86652	2.74881	2.2526	2.3769
cluster4	AT3G21700	Carubv10014303	CARHR097640	Thhalv10021267	2.30818	2.86545	3.376	2.93416	4.15544	4.52896	2.54405	2.40269	2.05221
cluster4	AT3G22260	Carubv10014491	CARHR098160	Thhalv10021399	2.49566	2.52194	2.56725	1.90056	3.2518	2.68946	1.64594	2.37205	3.01008
cluster4	AT3G23120	Carubv10016055	CARHR099030	Thhalv10020067	4.34158	0.840179	2.35276	3.22382	3.96854	1.95862	0.104726	1.17671	1.38234
cluster4	AT3G23240	Carubv10014553	CARHR099190	Thhalv10022374	2.56656	2.88324	2.58783	1.85576	2.13202	2.67469	2.63247	1.21678	1.12826
cluster4	AT3G25780	Carubv10019017	CARHR146680	Thhalv10004810	2.82109	4.0971	3.9381	2.06851	5.25727	4.33183	4.02681	1.70434	2.05114
cluster4	AT3G25882	Carubv10018259	CARHR146850	Thhalv10005164	1.66091	2.57768	2.13649	2.41871	2.89612	3.5956	0.941106	1.99678	1.64656
cluster4	AT3G25900	Carubv10017635	CARHR146880	Thhalv10004584	2.50711	3.0163	2.51237	2.29705	3.9828	3.04141	1.73566	2.51382	4.05623
cluster4	AT3G26680	Carubv10018420	CARHR147690	Thhalv10004102	2.34537	3.06809	2.70172	2.37576	3.09472	3.24473	2.15193	1.80265	1.66952
cluster4	AT3G27970	Carubv10017519	CARHR149630	Thhalv10005696	1.35846	2.31812	2.11572	2.22002	4.50802	3.35744	3.21239	0.873216	1.20063
cluster4	AT3G28580	Carubv10019198	CARHR286700	Thhalv10005338	4.60939	5.34739	1.62722	-0.155467	4.95649	5.88953	2.6837	2.82426	0.406149
cluster4	AT3G44350	Carubv10017870	CARHR104510	Thhalv10010503	4.46931	2.13906	3.12372	3.66043	2.82042	3.64234	0.764067	2.9184	-0.229945
cluster4	AT3G44830	Carubv10019048	CARHR151210	Thhalv10002852	3.19985	2.82997	2.38795	0.711171	3.12149	3.34214	4.00756	1.75304	-1.36143
cluster4	AT3G47380	Carubv10018051	CARHR156000	Thhalv10010734	2.44697	1.43051	2.41603	2.71794	3.14008	3.48065	2.66206	1.34244	2.32215
cluster4	AT3G47550	Carubv10017756	CARHR156180	Thhalv10010967	2.18253	2.80136	2.5758	2.42573	3.20171	3.55847	3.19879	1.75468	2.03455
cluster4	AT3G50760	Carubv10018870	CARHR160270	Thhalv10010596	2.41669	3.00112	2.80415	3.2717	3.46579	3.76334	3.83212	2.78802	1.30829
cluster4	AT3G52430	Carubv10016967	CARHR162200	Thhalv10011112	2.73992	3.17897	2.23873	1.88749	2.9804	2.72398	0.965738	0.483788	2.46195
cluster4	AT3G53770	Carubv10019274	CARHR163660	Thhalv10010830	4.80925	4.37889	2.60419	2.80734	5.24769	3.11262	-0.498149	-0.0173415	0.591101
cluster4	AT3G57280	Carubv10010248	CARHR167480	Thhalv10006224	2.1097	2.46306	2.54305	2.37568	3.20799	3.65019	2.99302	1.37922	1.63471
cluster4	AT3G57330	Carubv10016622	CARHR167520	Thhalv10005764	2.59592	3.31246	2.50448	1.93985	3.52129	3.40125	2.58179	2.28661	2.41761
cluster4	AT3G59880	Carubv10018249	CARHR170210	Thhalv10006503	2.91549	2.04603	3.32277	3.09917	2.66723	3.80735	0.726394	1.85565	2.12111
cluster4	AT3G61190	Carubv10018832	CARHR171500	Thhalv10006244	3.04793	3.45109	2.5858	1.78577	4.02709	4.9378	3.98712	1.53609	1.86552
cluster4	AT4G11000	Carubv10003560	CARHR223630	Thhalv10029125	3.97438	2.88313	3.03905	0.776087	1.42118	4.98542	3.14419	0.394624	0.686326
cluster4	AT4G18422	Carubv10006128	CARHR225240	Thhalv10026678	2.4709	0.988973	3.48134	3.10734	5.01839	6.80594	2.24915	2.22963	1.60361
cluster4	AT4G19460	Carubv10004612	CARHR226250	Thhalv10027268	3.58607	3.94502	3.49885	2.59773	4.01429	4.54368	3.75739	2.97858	0.74413
cluster4	AT4G20860	Carubv10007797	CARHR227430	Thhalv10026881	3.67479	3.3651	2.0416	2.78293	2.66269	3.1344	-0.1757	2.16299	3.67687
cluster4	AT4G21120	Carubv10006478	CARHR227710	Thhalv10024732	3.74182	2.7878	2.3297	3.173	3.14441	2.94098	2.36491	1.21103	2.27329
cluster4	AT4G22530	Carubv10007518	CARHR229420	Thhalv10026009	3.27647	2.85175	2.57727	2.79722	1.78189	3.80604	2.83379	2.79981	0.828032
cluster4	AT4G22640	Carubv10006332	CARHR229520	Thhalv10026519	5.74757	3.55994	3.12502	2.33754	3.05794	3.65962	3.86448	1.70245	1.92052
cluster4	AT4G22980	Carubv10004396	CARHR230040	Thhalv10024773	3.79261	4.08152	3.01875	2.84271	3.20408	4.02344	1.11708	2.17656	1.99114
cluster4	AT4G23220	Carubv10004328	CARHR230400	Thhalv10024579	6.05963	0.683584	4.69644	4.22931	1.16216	5.69965	5.12781	-0.331313	-0.339626
cluster4	AT4G24110	Carubv10005571	CARHR231510	Thhalv10026087	3.43267	3.41791	4.17423	3.01487	4.27117	5.77653	2.87229	1.43503	1.50645
cluster4	AT4G25670	Carubv10005814	CARHR233110	Thhalv10027473	2.16191	3.77601	2.34675	1.24276	2.658	3.26037	1.96657	-0.0173415	1.76065
cluster4	AT4G25900	Carubv10005219	CARHR233370	Thhalv10025755	2.58751	2.75464	2.73257	2.06184	3.73475	3.00022	3.39268	2.90116	1.03229
cluster4	AT4G27980	Carubv10004479	CARHR235680	Thhalv10024735	3.12514	3.58457	3.08482	2.29655	3.42993	4.14796	-1.42855	1.5011	-0.678563
cluster4	AT4G28703	Carubv10006083	CARHR236480	Thhalv10026608	0.737943	3.21514	2.7036	3.80415	3.8315	4.00319	1.8851	4.08865	1.70811
cluster4	AT4G30090	Carubv10006249	CARHR238000	Thhalv10025377	2.54971	3.40259	3.48785	3.1622	3.9337	3.28911	1.66713	1.13284	2.39478
cluster4	AT4G30430	Carubv10006331	CARHR238330	Thhalv10027429	5.22789	4.1096	4.07674	3.313	3.92085	5.51338	1.40337	0.49982	0.866486
cluster4	AT4G30530	Carubv10005588	CARHR238420	Thhalv10026067	2.53436	1.69531	2.52708	1.71379	3.63003	3.59294	2.14197	0.921218	2.05336
cluster4	AT4G32300	Carubv10006528	CARHR240210	Thhalv10024411	2.40442	2.78717	2.28205	2.22274	3.24986	2.79616	1.50164	1.4169	1.59944
cluster4	AT4G34150	Carubv10005541	CARHR242700	Thhalv10026060	2.85101	3.56136	3.22346	3.09621	3.82791	4.4351	3.15186	3.21478	2.80557
cluster4	AT4G34180	Carubv10005534	CARHR242630	Thhalv10026013	2.57314	2.47394	2.56912	2.3696	3.30308	3.60134	2.29249	1.74527	2.52046
cluster4	AT4G35480	Carubv10006700	CARHR243810	Thhalv10027339	3.22021	3.44335	3.11346	3.62097	4.36551	3.90327	3.80568	1.59002	2.11967
cluster4	AT4G39030	Carubv10004548	CARHR247720	Thhalv10024859	2.30428	3.03489	2.93029	2.0398	3.64982	3.74792	2.01748	1.81698	2.02075
cluster4	AT4G39640	Carubv10004464	CARHR247090	Thhalv10024781	3.66625	4.08876	3.82791	3.30056	4.27215	4.48721	3.3987	2.38953	2.14797
cluster4	AT4G39890	Carubv10005710	CARHR246810	Thhalv10026225	3.16021	2.98705	3.50929	3.27547	4.507	4.28116	0.897301	0.994868	1.41109
cluster4	AT4G39940	Carubv10006314	CARHR246760	Thhalv10025861	2.33317	1.84266	2.77977	1.65093	3.75434	3.56538	-0.48906	1.67635	2.67296
cluster4	AT4G40080	Carubv10005112	CARHR246540	Thhalv10025543	2.70545	3.37516	3.39224	2.75192	4.07608	4.33871	3.83358	-0.0173415	2.85469
cluster4	AT5G01830	Carubv10008498	CARHR212180	Thhalv10022583	2.45589	3.339	3.35253	2.25746	4.37823	4.46505	2.94321	2.52155	2.08894
cluster4	AT5G02970	Carubv10000728	CARHR210310	Thhalv10013252	1.52067	2.94182	2.44126	1.67072	3.49629	3.00343	2.09095	1.3745	0.53284
cluster4	AT5G05340	Carubv10001455	CARHR207910	Thhalv10014105	2.42946	2.311	2.66641	1.71915	2.71879	3.36579	0.967567	2.31635	1.03964
cluster4	AT5G11970	Carubv10003648	CARHR201160	Thhalv10015080	1.86729	2.10434	2.52365	2.5045	2.8638	3.31414	1.23374	0.707493	2.18834
cluster4	AT5G12930	Carubv10000933	CARHR200520	Thhalv10013519	3.59457	3.99143	3.31924	3.11743	3.97986	3.49115	1.10366	0.906557	-0.412531
cluster4	AT5G13190	Carubv10002238	CARHR200280	Thhalv10014995	2.28679	2.14558	2.97904	2.71388	3.25681	3.71421	2.60689	1.60312	0.971766
cluster4	AT5G18490	Carubv10000625	CARHR194520	Thhalv10013152	2.44836	3.09158	2.59162	2.31092	2.92019	3.06344	1.88592	1.59178	2.30798
cluster4	AT5G24600	Carubv10001810	CARHR188850	Thhalv10005694	3.36368	3.54969	3.49535	2.3976	4.60167	3.58262	2.16868	2.08476	1.43105
cluster4	AT5G26920	Carubv10000582	CARHR186650	Thhalv10005593	3.53076	4.76022	2.67657	2.60198	2.94211	3.21178	3.21053	2.27333	1.03147
cluster4	AT5G27760	Carubv10002335	CARHR186270	Thhalv10005192	2.46477	2.56919	2.88964	2.06731	2.99559	4.05615	2.08088	0.822682	2.78488
cluster4	AT5G36925	Carubv10006142	CARHR216180	Thhalv10028243	6.49698	5.07549	5.17092	4.86473	5.49476	6.64403	0.984329	3.26347	0.338165
cluster4	AT5G38900	Carubv10005517	CARHR263630	Thhalv10027927	2.40883	2.61612	2.68352	2.52965	3.35937	4.63219	4.7134	0.362239	0.13739
cluster4	AT5G39000	Carubv10007175	CARHR263480	Thhalv10027636	3.29877	3.64686	2.97295	2.11677	3.88593	2.7754	2.10689	2.40352	1.54254
cluster4	AT5G39670	Carubv10007058	CARHR262620	Thhalv10028351	3.48394	3.61599	2.45142	2.40642	2.66082	3.7812	2.56912	2.32982	0.170327
cluster4	AT5G42830	Carubv10026362	CARHR181320	Thhalv10003208	3.64613	3.67278	3.1541	3.73021	3.37847	3.99292	1.02382	3.93482	0.574507
cluster4	AT5G44070	Carubv10026307	CARHR179220	Thhalv10003194	3.98654	4.1759	3.8505	3.29461	4.52918	4.49741	1.01003	3.30141	3.96816
cluster4	AT5G47960	Carubv10027077	CARHR184300	Thhalv10004881	2.30102	2.57819	2.96151	2.35652	2.58499	3.48294	1.72999	2.03486	2.35817
cluster4	AT5G49520	Carubv10026463	CARHR287940	Thhalv10004295	3.16661	3.74824	3.1187	2.96871	3.83949	4.20983	2.89354	3.95181	2.00742
cluster4	AT5G52670	Carubv10028293	CARHR265660	Thhalv10015896	5.60808	4.26967	4.27287	1.77271	4.06712	5.0258	2.37071	2.8351	0.338165
cluster4	AT5G54490	Carubv10028639	CARHR267770	Thhalv10015021	3.38906	2.96273	3.02622	2.52691	4.06855	3.89515	3.46646	2.36251	0.802204
cluster4	AT5G57035	Carubv10025897	CARHR270790	Thhalv10012732	2.31799	3.43149	2.26221	1.97248	2.81716	2.97304	2.15424	2.05579	1.55229
cluster4	AT5G64120	Carubv10026774	CARHR278030	Thhalv10004581	2.90999	2.27064	1.59523	2.68906	2.73301	4.16607	2.80133	1.85173	1.37388
cluster4	AT5G64790	Carubv10027803	CARHR278780	Thhalv10004092	5.4866	5.909	5.32552	4.41759	6.46643	5.86118	0.0432134	-0.0173415	0.338165
cluster4	AT5G64900	Carubv10027392	CARHR278930	Thhalv10005173	1.8362	2.42948	3.29052	2.91163	4.39422	3.60724	1.99398	0.606968	5.01
cluster4	AT5G66210	Carubv10028399	CARHR281520	Thhalv10003969	2.39705	3.09867	2.54234	2.19262	3.25546	3.46673	1.62333	2.86075	1.44063
cluster5	AT1G06135	Carubv10010975	CARHR124970	Thhalv10017816	5.84464	8.1634	6.6707	5.87298	7.33342	7.56837	8.1396	6.93981	9.32854
cluster5	AT1G06137	Carubv10011363	CARHR005650	Thhalv10009900	4.18382	4.56412	5.60868	4.57578	7.32924	4.54813	7.24739	5.87283	8.13702
cluster5	AT1G07135	Carubv10011181	CARHR006840	Thhalv10009119	4.81846	5.49471	5.37122	3.55934	5.82009	6.76825	6.8135	3.65397	4.60745
cluster5	AT1G07160	Carubv10009317	CARHR006870	Thhalv10008595	5.92801	6.6528	6.57086	4.80435	7.29809	8.03642	8.91125	4.68014	6.18784
cluster5	AT1G13520	Carubv10011246	CARHR013840	Thhalv10007827	3.74518	4.72083	4.45341	3.71398	4.81729	4.71345	6.69385	5.64399	7.48709
cluster5	AT1G14540	Carubv10010887	CARHR015030	Thhalv10008244	6.92107	7.55054	6.03578	5.21846	5.9844	6.55274	8.12339	7.30436	9.59724
cluster5	AT1G15520	Carubv10008103	CARHR016070	Thhalv10006564	7.62136	5.53027	4.87037	3.04988	5.63959	6.55	5.50495	4.41148	4.2389
cluster5	AT1G17147	Carubv10010726	CARHR017720	Thhalv10009187	4.39299	5.6636	4.98424	4.76576	6.21565	6.72616	6.39799	4.45664	6.03509
cluster5	AT1G19020	Carubv10010768	CARHR019640	Thhalv10009213	4.89523	4.99089	4.45734	3.96397	5.2518	6.22493	6.37726	5.19443	6.38771
cluster5	AT1G22810	Carubv10011955	CARHR023170	Thhalv10009842	7.02778	6.57005	6.94008	5.28253	7.30946	8.66173	8.345	6.80388	7.12141
cluster5	AT1G24140	Carubv10011449	CARHR024430	Thhalv10007920	5.65434	5.5239	4.8269	3.84715	6.30738	6.13385	5.06603	3.35338	5.41528
cluster5	AT1G36622	Carubv10006166	CARHR117970	Thhalv10009203	5.57787	5.21124	3.73377	4.56836	5.02591	6.24603	6.07596	5.48606	6.59668
cluster5	AT1G51920	Carubv10010790	CARHR042070	Thhalv10011907	6.80116	6.43083	5.77861	4.30085	6.15057	6.73737	5.80915	5.12236	4.61038
cluster5	AT1G56060	Carubv10010821	CARHR045780	Thhalv10011923	5.83775	5.60944	5.33121	3.10604	5.2292	7.10328	7.25275	8.25856	7.29214
cluster5	AT1G56250	Carubv10020754	CARHR289800	Thhalv10024163	9.14217	7.72077	7.79565	5.46568	7.22768	8.04964	9.18697	6.85249	6.2698
cluster5	AT1G58420	Carubv10021366	CARHR284110	Thhalv10023719	4.61835	4.629	4.68159	4.87963	4.88681	6.4722	5.2467	4.83599	6.32388
cluster5	AT1G69930	Carubv10021952	CARHR063020	Thhalv10019743	4.96938	6.40215	5.22581	2.95428	6.76082	6.15033	5.06669	8.27899	9.56841
cluster5	AT1G71520	Carubv10022408	CARHR291170	Thhalv10019510	7.44451	6.34732	4.81038	4.31683	6.47306	7.93324	8.19983	4.26811	8.10266
cluster5	AT1G72520	Carubv10019743	CARHR065460	Thhalv10018089	6.8684	6.46276	6.1166	4.18366	6.7989	7.50706	5.18516	3.09874	7.47356
cluster5	AT1G78410	Carubv10021179	CARHR071930	Thhalv10019550	5.30897	6.31635	5.52129	4.64142	5.85321	6.54478	7.27421	5.34363	6.62225
cluster5	AT1G80820	Carubv10020628	CARHR073650	Thhalv10018849	4.42656	5.4292	5.17146	3.87328	6.4754	5.92339	7.13472	7.1448	6.06793
cluster5	AT2G02010	Carubv10017075	CARHR144620	Thhalv10004080	6.1961	5.58577	5.58298	3.78774	6.27962	6.85782	7.75148	5.75307	5.09981
cluster5	AT2G22880	Carubv10024877	CARHR114200	Thhalv10000717	4.45595	3.8503	4.08364	3.7271	4.92328	5.82275	6.7939	5.3825	6.4928
cluster5	AT2G23270	Carubv10024419	CARHR292860	Thhalv10000531	5.97562	6.44871	6.1057	4.3836	6.64617	8.42364	9.88534	7.53804	8.12346
cluster5	AT2G25735	Carubv10024318	CARHR115510	Thhalv10000375	4.25552	4.91826	4.95371	4.37466	5.9701	6.53327	8.33658	3.05566	5.77724
cluster5	AT2G29110	Carubv10022590	CARHR122400	Thhalv10016194	5.32193	5.44018	4.94787	4.09298	5.48099	4.49686	9.66704	7.81924	4.45118
cluster5	AT2G32030	Carubv10024139	CARHR125820	Thhalv10017278	4.65122	4.8623	4.52505	3.54695	5.29606	6.51896	6.56468	4.18334	5.41492
cluster5	AT2G35980	Carubv10024001	CARHR130230	Thhalv10017726	5.54818	5.95866	4.74827	4.28321	7.74952	7.22547	5.48482	5.97769	5.81972
cluster5	AT2G37430	Carubv10024141	CARHR132160	Thhalv10017303	5.56162	6.44617	6.56218	4.70065	6.69391	7.83455	8.16549	4.90526	5.18798
cluster5	AT2G40180	Carubv10023372	CARHR135210	Thhalv10017681	5.19938	4.77076	4.96122	4.3524	5.71589	5.34457	8.1624	5.50996	6.04186
cluster5	AT2G40740	Carubv10023773	CARHR135830	Thhalv10017926	6.67739	6.38258	6.91616	4.0255	6.39577	5.98241	9.75875	8.88856	7.70415
cluster5	AT3G01830	Carubv10015918	CARHR075100	Thhalv10021726	7.59414	5.28699	5.22384	4.11641	5.53972	6.95427	5.76755	7.57863	3.3206
cluster5	AT3G02800	Carubv10014666	CARHR076810	Thhalv10021545	4.21892	5.40192	5.18625	3.16031	5.95944	6.20717	7.70575	5.3642	5.38804
cluster5	AT3G02840	Carubv10016286	CARHR076850	Thhalv10020937	6.7383	6.04613	6.33578	3.96415	6.68389	7.45202	10.0967	8.07924	8.26253
cluster5	AT3G12910	Carubv10014270	CARHR087430	Thhalv10021225	8.52888	7.68446	8.09515	5.32588	8.56536	6.84289	11.0268	8.25119	9.54516
cluster5	AT3G15518	Carubv10016443	CARHR090570	Thhalv10021811	6.19878	5.95626	5.54335	4.80126	6.44038	7.12319	7.84595	6.24176	4.75087
cluster5	AT3G19615	Carubv10016371	CARHR095070	Thhalv10021824	5.6694	5.95582	5.44201	3.32696	6.99409	6.64989	6.10523	3.72645	6.69532
cluster5	AT3G21520	Carubv10014640	CARHR097450	Thhalv10022105	4.81933	4.40143	5.69715	4.04959	6.37767	4.47218	9.0884	2.015	7.18402
cluster5	AT3G23230	Carubv10015406	CARHR099180	Thhalv10022108	7.53952	6.65869	6.31906	4.47152	7.07962	7.79976	11.8655	6.83005	9.37383
cluster5	AT3G23250	Carubv10015750	CARHR099200	Thhalv10022110	5.64209	6.30354	6.33523	4.65134	5.89187	7.31039	6.38234	5.81068	5.08463
cluster5	AT3G52520	Carubv10018232	CARHR162280	Thhalv10011026	4.27046	5.16939	4.13865	3.69084	5.7736	6.1441	6.57654	5.23013	8.18276
cluster5	AT3G53600	Carubv10018114	CARHR163530	Thhalv10010956	3.18121	3.86701	4.51728	1.95626	6.0264	6.63482	6.68277	4.47122	7.68303
cluster5	AT3G54150	Carubv10018982	CARHR164070	Thhalv10010557	6.14132	5.7783	5.14972	3.79069	5.70365	6.56419	5.53992	3.08106	7.20131
cluster5	AT3G55840	Carubv10019166	CARHR165950	Thhalv10010400	4.75068	5.99001	5.30361	4.41979	6.75251	6.58095	7.17656	4.77619	5.17773
cluster5	AT4G04480	Carubv10001108	CARHR253030	Thhalv10028702	6.05954	7.11534	8.3094	3.2678	9.8252	7.25224	12.2723	9.19882	12.4509
cluster5	AT4G11070	Carubv10001458	CARHR255530	Thhalv10028794	4.24125	6.31661	6.89997	4.81044	5.98243	5.22555	8.04493	8.83239	6.00625
cluster5	AT4G11470	Carubv10000407	CARHR255070	Thhalv10028502	8.02256	5.59525	5.8349	2.84562	6.03456	5.84468	3.10192	3.42317	5.20273
cluster5	AT4G14450	Carubv10007627	CARHR220660	Thhalv10027546	7.7786	5.73624	5.6937	5.08794	7.16715	6.91562	3.76938	2.26536	4.92948
cluster5	AT4G16820	Carubv10007507	CARHR223440	Thhalv10027304	7.558	5.41238	5.57542	3.38381	6.78304	6.2756	8.24472	5.95132	7.23997
cluster5	AT4G18540	Carubv10004475	CARHR225390	Thhalv10024794	4.17617	5.72106	6.98303	5.32349	8.69029	7.43505	4.75797	6.15058	12.2345
cluster5	AT4G21920	Carubv10006011	CARHR228720	Thhalv10026602	6.53466	4.6267	5.36698	4.33262	6.61303	7.51301	7.83368	4.14084	7.26487
cluster5	AT4G22030	Carubv10004916	CARHR228850	Thhalv10026894	7.18867	7.21738	7.46373	4.44472	9.1816	6.76458	8.97755	7.66732	8.55134
cluster5	AT4G23030	Carubv10006239	CARHR230090	Thhalv10024949	4.44172	5.40667	5.31998	3.88031	5.90952	5.18531	7.49301	7.37662	7.34959
cluster5	AT4G24570	Carubv10007320	CARHR231970	Thhalv10027021	3.51089	4.86142	4.40408	3.35707	6.36065	6.21994	8.02221	6.60163	6.02933
cluster5	AT4G28085	Carubv10006589	CARHR235790	Thhalv10026985	4.65006	5.31335	5.69812	4.70409	7.35675	6.66769	9.40764	2.81379	6.98237
cluster5	AT4G37710	Carubv10007212	CARHR246100	Thhalv10027223	6.82731	7.46657	7.25928	5.73456	7.86722	7.0195	8.38014	5.94396	7.76637
cluster5	AT5G05300	Carubv10003272	CARHR207940	Thhalv10021821	6.93432	5.58081	5.45068	5.12194	6.08695	7.06689	9.3591	4.41996	3.60595
cluster5	AT5G11140	Carubv10002784	CARHR202160	Thhalv10016060	5.5542	6.81229	5.44802	4.12894	8.78267	6.29085	1.3624	8.95448	8.82279
cluster5	AT5G22380	Carubv10001788	CARHR191150	Thhalv10014563	5.47105	6.96206	5.90202	5.27813	7.10267	6.58651	5.93753	3.26186	5.77278
cluster5	AT5G24110	Carubv10001559	CARHR189470	Thhalv10004616	8.7537	7.30887	6.5969	5.35019	7.73765	7.43737	9.94047	8.38319	9.63823
cluster5	AT5G27420	Carubv10003676	CARHR186030	Thhalv10004360	4.9135	5.03646	4.81708	4.01137	5.68859	6.06217	6.57152	3.84626	5.2387
cluster5	AT5G35735	Carubv10004863	CARHR216840	Thhalv10004354	5.1706	5.06191	4.68531	3.73292	5.13274	6.46023	6.87177	5.63734	5.88463
cluster5	AT5G36970	Carubv10006971	CARHR216120	Thhalv10028131	6.42542	6.83967	6.13128	2.53394	7.42354	7.3173	7.8234	6.60829	6.89143
cluster5	AT5G38310	Carubv10006613	CARHR214270	Thhalv10027932	4.34214	5.65646	5.57449	4.30601	6.50117	5.05913	7.78304	5.74207	6.61559
cluster5	AT5G43650	Carubv10027730	CARHR006300	Thhalv10003353	3.73203	6.10396	6.86437	1.12051	6.13847	4.91348	5.73269	3.46808	8.24206
cluster5	AT5G46295	Carubv10027473	CARHR175490	Thhalv10001093	5.63405	4.85284	5.5819	4.46724	6.60406	6.85265	7.99756	7.3163	4.00143
cluster5	AT5G47850	Carubv10025941	CARHR184390	Thhalv10003696	4.79062	6.51941	5.26782	3.94573	5.47605	5.66347	7.67932	6.21924	6.21375
cluster5	AT5G56960	Carubv10026331	CARHR270700	Thhalv10013360	9.541	6.86297	6.31518	4.92465	7.2345	7.77993	9.71224	6.79787	7.98449
cluster5	AT5G64905	Carubv10027429	CARHR278940	Thhalv10005182	7.22435	8.0697	7.11917	5.26421	7.96934	8.29571	11.0086	6.82512	9.17716
cluster5	AT5G65600	Carubv10028148	CARHR279560	Thhalv10003759	7.1904	5.82502	5.99316	4.24977	6.39307	6.33083	5.72833	8.50946	3.35921
cluster6	AT1G01010	Carubv10009049	CARHR001500	Thhalv10007665	1.22551	1.12666	0.696553	0.570561	0.430578	0.839292	1.6841	0.978173	0.849189
cluster6	AT1G01120	Carubv10012263	CARHR001340	Thhalv10007351	1.30996	0.589262	0.991109	0.984019	1.22215	1.16477	-0.0644152	1.72989	1.77006
cluster6	AT1G01440	Carubv10008546	CARHR001000	Thhalv10007009	0.767511	1.01016	0.522865	0.397403	0.770557	0.544672	0.957992	0.777336	1.84058
cluster6	AT1G01470	Carubv10010557	CARHR000900	Thhalv10009011	0.43761	0.583096	0.514779	0.864448	0.511462	0.413065	1.28869	0.675269	0.522198
cluster6	AT1G01550	Carubv10009625	CARHR000810	Thhalv10008079	1.11679	1.24233	1.13786	1.30558	1.48865	1.50095	1.76751	0.958587	1.20026
cluster6	AT1G01650	Carubv10008675	CARHR000700	Thhalv10007312	0.393821	0.601062	0.392989	0.33333	0.696307	0.745848	1.36228	0.899038	0.848896
cluster6	AT1G01720	Carubv10009926	CARHR000620	Thhalv10008371	0.559032	0.474117	1.42515	1.07299	1.17494	1.68801	0.861934	1.04146	0.0776179
cluster6	AT1G02120	Carubv10008556	CARHR000210	Thhalv10007106	0.581086	0.941439	0.816002	0.586811	1.1671	1.04569	0.279574	1.01515	1.27787
cluster6	AT1G02410	Carubv10009922	CARHR001740	Thhalv10008363	0.566189	0.532491	0.61355	0.63351	0.658818	0.794774	1.40939	0.84222	1.23262
cluster6	AT1G02500	Carubv10009376	CARHR001810	Thhalv10007845	0.198527	0.700825	0.309421	0.584489	0.660956	0.621065	1.82008	0.490067	1.72524
cluster6	AT1G02860	Carubv10009650	CARHR002200	Thhalv10008149	0.953382	0.928831	1.29215	0.786641	1.06753	1.18411	1.0976	0.681952	0.857553
cluster6	AT1G02900	Carubv10012118	CARHR002250	Thhalv10009124	1.03518	0.573274	0.561939	0.944755	1.12114	1.02631	1.93248	0.235266	1.52068
cluster6	AT1G03060	Carubv10008059	CARHR002410	Thhalv10006519	1.36204	1.21364	0.385634	0.138677	0.180283	0.930381	1.32372	1.11256	1.08785
cluster6	AT1G03080	Carubv10008080	CARHR002430	Thhalv10006534	1.14381	1.0909	0.242245	-0.380875	0.196746	0.627143	1.24252	0.568332	0.278997
cluster6	AT1G03610	Carubv10012401	CARHR002950	Thhalv10008277	0.480015	0.79274	0.696648	1.42995	1.38839	0.978786	1.0538	0.573666	1.41262
cluster6	AT1G03770	Carubv10009016	CARHR003100	Thhalv10007494	0.844894	1.37706	0.928354	-0.155994	0.975952	0.573387	0.952843	-0.220306	0.728435
cluster6	AT1G04200	Carubv10008423	CARHR003530	Thhalv10006925	0.947802	1.37866	1.04006	0.770305	1.17001	0.666127	1.23107	1.34189	0.446642
cluster6	AT1G04360	Carubv10012007	CARHR003690	Thhalv10009604	0.487429	0.595519	1.12601	0.805929	1.77411	1.08866	0.363513	1.22423	1.96092
cluster6	AT1G04500	Carubv10009410	CARHR003840	Thhalv10007843	1.92133	0.852929	0.339377	0.637544	2.18285	1.83959	1.26121	-0.867119	1.97357
cluster6	AT1G04780	Carubv10008526	CARHR004170	Thhalv10007017	1.01954	1.24847	0.426114	0.0649339	0.705603	0.483227	0.906477	1.01952	0.961936
cluster6	AT1G05010	Carubv10009749	CARHR004440	Thhalv10008207	0.932525	0.220666	0.438373	0.612902	0.71523	0.541902	1.65447	0.489864	0.46018
cluster6	AT1G05670	Carubv10008426	CARHR005190	Thhalv10010012	1.26258	1.89946	1.46254	-0.10407	2.75378	0.0435314	1.68636	-0.0511198	-0.473191
cluster6	AT1G05710	Carubv10010563	CARHR005230	Thhalv10009016	0.452989	0.723246	0.798229	0.755502	1.22211	1.78222	0.660724	0.876475	1.24688
cluster6	AT1G06050	Carubv10009838	CARHR005570	Thhalv10008266	0.675227	0.806029	0.72641	0.716862	1.20866	0.839133	2.15435	1.41069	0.0968813
cluster6	AT1G06140	Carubv10011460	CARHR005670	Thhalv10018358	1.28215	0.710857	-0.0172913	0.583126	1.8634	0.859824	2.43355	0.617917	0.241272
cluster6	AT1G06620	Carubv10011473	CARHR006210	Thhalv10009355	0.694694	0.98794	0.820135	0.385869	1.76608	0.84317	0.741161	0.697595	2.08853
cluster6	AT1G06830	Carubv10011626	CARHR006520	Thhalv10009180	0.522497	0.488988	1.20874	1.06388	1.0918	1.82424	1.34765	0.297743	0.434356
cluster6	AT1G07030	Carubv10011609	CARHR006720	Thhalv10008381	0.497377	0.905996	0.801804	0.81255	0.9345	1.16724	0.119625	1.36732	1.03327
cluster6	AT1G07560	Carubv10011533	CARHR007350	Thhalv10006786	0.756436	1.17118	0.70918	-0.469616	0.692862	0.129821	1.00865	1.21525	1.41056
cluster6	AT1G08290	Carubv10009617	CARHR008140	Thhalv10008125	0.836172	1.13119	1.6665	1.10693	1.30065	1.03925	0.996601	0.971427	0.17777
cluster6	AT1G08720	Carubv10008230	CARHR008640	Thhalv10006727	0.757445	0.915447	0.481309	0.379664	0.65299	0.45353	0.861198	1.27473	0.964356
cluster6	AT1G08830	Carubv10010551	CARHR008750	Thhalv10008927	0.216828	0.17368	0.562167	0.579195	0.84067	0.986171	1.15578	1.59085	0.450938
cluster6	AT1G08920	Carubv10010993	CARHR008830	Thhalv10007539	0.520197	0.2707	0.506322	-0.0367317	0.621674	0.246419	1.11156	1.19783	0.999576
cluster6	AT1G09400	Carubv10009647	CARHR009360	Thhalv10009352	1.07673	1.34493	0.37498	-0.0144767	-0.0696006	0.733262	0.785051	0.568472	0.0761684
cluster6	AT1G09645	Carubv10010723	CARHR009620	Thhalv10009166	0.585225	0.927604	1.18197	1.20926	1.50521	1.65243	1.60293	0.381325	0.153742
cluster6	AT1G10150	Carubv10009272	CARHR010250	Thhalv10007757	0.77042	1.08657	0.764715	0.784254	1.92431	0.990916	0.809336	0.582558	1.12635
cluster6	AT1G10410	Carubv10011985	CARHR010550	Thhalv10007496	0.955369	1.04833	0.705704	0.624711	1.14414	1.04909	1.58833	1.78247	0.601775
cluster6	AT1G10650	Carubv10009658	CARHR010820	Thhalv10008132	0.763183	1.20582	0.879428	0.185051	1.68749	0.701384	0.76148	0.588895	1.75903
cluster6	AT1G10720	Carubv10009128	CARHR010910	Thhalv10007670	0.558813	0.637957	0.810834	0.452115	1.057	0.506801	0.438418	0.744377	0.843765
cluster6	AT1G11210	Carubv10009737	CARHR011440	Thhalv10008322	0.654189	1.10907	1.132	1.37872	1.91737	1.07234	1.4052	1.25124	1.16551
cluster6	AT1G11905	Carubv10012392	CARHR012230	Thhalv10008726	0.454917	0.476955	1.00369	0.522429	0.715192	0.620029	2.10433	0.921127	0.213398
cluster6	AT1G12560	Carubv10011828	CARHR012840	Thhalv10008503	1.40727	0.750709	0.686257	0.45148	1.31284	1.5093	0.887785	1.32337	0.295868
cluster6	AT1G12710	Carubv10009895	CARHR013010	Thhalv10008388	0.268886	0.426065	0.708995	0.356371	0.985187	0.954856	0.925945	1.81943	0.456674
cluster6	AT1G12750	Carubv10011917	CARHR013040	Thhalv10008314	0.57106	0.90031	1.41717	1.3149	0.960969	1.74671	0.37731	1.22579	2.53726
cluster6	AT1G13260	Carubv10009612	CARHR013640	Thhalv10010019	0.841242	1.0203	0.521423	1.09156	0.476315	0.942888	1.83025	1.07359	0.753918
cluster6	AT1G13360	Carubv10010335	CARHR013740	Thhalv10008809	0.660339	0.359379	0.779828	0.960975	0.414988	0.615345	1.59978	0.264064	-0.042656
cluster6	AT1G13590	Carubv10011693	CARHR013920	Thhalv10009205	-0.274938	0.626481	0.56427	0.602292	1.09753	1.04128	1.29577	0.540212	1.426
cluster6	AT1G14000	Carubv10009171	CARHR014370	Thhalv10007646	1.20941	0.70233	0.844064	0.399429	0.923367	0.804074	0.972766	1.22702	0.660563
cluster6	AT1G14010	Carubv10010285	CARHR014380	Thhalv10008684	0.341021	0.502433	0.640598	0.676284	0.855944	0.793911	0.768172	1.61916	0.417783
cluster6	AT1G14170	Carubv10009036	CARHR014570	Thhalv10006996	1.58414	1.00055	0.978935	0.596237	1.09758	1.07923	0.695636	1.27961	0.514103
cluster6	AT1G14730	Carubv10010271	CARHR015260	Thhalv10008705	0.0299335	1.55573	1.24721	1.17933	1.82086	0.525865	1.42806	0.186577	1.63568
cluster6	AT1G15030	Carubv10009528	CARHR015570	Thhalv10008018	0.952282	1.03677	1.28	0.864973	1.60893	1.61383	1.88575	0.434743	-0.0451428
cluster6	AT1G15040	Carubv10011706	CARHR015580	Thhalv10009317	1.36367	1.07838	0.253866	0.445724	1.98289	0.501068	1.78906	3.01631	0.186351
cluster6	AT1G15100	Carubv10010511	CARHR015620	Thhalv10008995	-0.269868	0.550012	0.479689	0.714252	0.652876	1.10427	0.856774	0.592986	0.202045
cluster6	AT1G15170	Carubv10008971	CARHR015690	Thhalv10007529	0.97391	0.742473	1.21747	0.603931	1.00291	1.24198	1.78216	0.0862477	1.88909
cluster6	AT1G15890	Carubv10012171	CARHR215210	Thhalv10028114	2.22783	-0.0578883	0.432595	0.312789	0.348197	0.469096	1.1113	0.202957	-0.174509
cluster6	AT1G16180	Carubv10009295	CARHR016660	Thhalv10007762	0.646866	0.257434	0.494803	0.705812	0.886838	0.895258	1.07846	0.607422	0.337152
cluster6	AT1G17060	Carubv10008841	CARHR017590	Thhalv10007523	1.15262	1.29644	1.0533	0.815432	2.01133	0.813054	2.05497	0.910105	0.32999
cluster6	AT1G17180	Carubv10010257	CARHR017750	Thhalv10008735	1.08855	0.2238	0.653335	0.434771	0.327989	0.894815	1.32586	1.05614	-0.353559
cluster6	AT1G17340	Carubv10011400	CARHR017930	Thhalv10006824	0.384181	1.12003	0.948438	0.520497	0.584602	0.863291	1.45284	0.143539	0.557545
cluster6	AT1G18560	Carubv10008481	CARHR019180	Thhalv10006990	0.172333	0.69768	0.458785	0.251401	0.475029	0.693354	1.0675	0.5008	0.413666
cluster6	AT1G19010	Carubv10009495	CARHR019630	Thhalv10008269	0.0774175	0.746416	0.408929	0.62147	1.16997	0.865684	0.18462	1.42984	0.616999
cluster6	AT1G19130	Carubv10010381	CARHR019730	Thhalv10008865	0.63932	0.702387	0.910338	0.815511	1.30094	1.39638	0.505197	1.42621	2.34107
cluster6	AT1G19360	Carubv10011112	CARHR019950	Thhalv10007712	0.97224	1.16349	0.683566	0.914519	0.994407	0.914042	1.14863	1.39334	2.25715
cluster6	AT1G20110	Carubv10008630	CARHR020600	Thhalv10007122	0.396643	0.693444	0.424271	0.418265	0.537355	0.450532	1.01072	0.512698	0.511021
cluster6	AT1G20780	Carubv10008332	CARHR021220	Thhalv10006866	1.22215	0.994014	0.572894	0.483449	0.687173	0.713012	1.50607	0.716498	0.979239
cluster6	AT1G20980	Carubv10012577	CARHR021440	Thhalv10006656	1.23577	0.946511	0.547067	0.106544	0.731903	0.748233	1.10436	0.291021	0.110285
cluster6	AT1G21080	Carubv10009386	CARHR021530	Thhalv10007857	1.17646	1.30413	1.02006	0.686636	1.79234	0.737593	0.985272	0.791512	0.73592
cluster6	AT1G21380	Carubv10011646	CARHR021770	Thhalv10007405	1.27833	1.3782	1.01031	0.612973	1.26535	1.14043	1.19456	0.861436	0.205791
cluster6	AT1G21900	Carubv10010277	CARHR022250	Thhalv10008753	0.768147	0.666739	1.10627	1.04317	1.44115	1.49797	0.820594	0.332153	0.728951
cluster6	AT1G22070	Carubv10009423	CARHR022430	Thhalv10007944	1.08897	1.10011	0.975261	0.870266	1.09038	1.16526	1.48255	0.838711	1.45374
cluster6	AT1G22870	Carubv10008248	CARHR023220	Thhalv10006737	0.862764	1.14227	0.560505	0.173104	0.759607	0.735085	1.23211	0.08444	0.157564
cluster6	AT1G23170	Carubv10008554	CARHR023630	Thhalv10007115	1.01833	1.74255	0.619906	1.08346	1.38085	1.22668	1.13372	-0.0173415	0.908925
cluster6	AT1G25280	Carubv10009152	CARHR026240	Thhalv10007625	0.719818	1.21066	0.753475	0.449309	1.26079	1.15707	1.46374	0.760815	1.0116
cluster6	AT1G26440	Carubv10009115	CARHR025520	Thhalv10007943	0.282086	0.749013	0.586852	0.525622	0.648285	0.568851	1.46116	0.779072	0.764808
cluster6	AT1G26690	Carubv10010145	CARHR025270	Thhalv10008758	0.808866	0.331541	0.751009	0.734957	1.09899	0.755063	1.04178	0.863393	0.275495
cluster6	AT1G27290	Carubv10010578	CARHR026860	Thhalv10009048	0.291279	0.154336	0.371205	1.09203	0.656828	0.706642	0.926171	0.662027	0.978129
cluster6	AT1G27500	Carubv10008543	CARHR027090	Thhalv10007008	0.960278	1.54995	0.757922	0.454751	1.1166	1.1849	1.87034	1.47098	1.24487
cluster6	AT1G28200	Carubv10009952	CARHR027690	Thhalv10008557	0.631621	0.48646	0.558441	0.788984	0.972072	1.11535	1.21213	0.797901	0.218705
cluster6	AT1G28240	Carubv10008674	CARHR027730	Thhalv10007204	0.931279	1.24137	0.607862	0.421686	1.21532	0.987758	1.92459	0.912882	0.755433
cluster6	AT1G28360	Carubv10011585	CARHR027850	Thhalv10009947	0.044729	0.861686	0.582377	1.55726	0.462042	2.10093	1.42502	0.342667	2.54604
cluster6	AT1G29340	Carubv10008444	CARHR028670	Thhalv10006853	0.771713	1.27075	0.963966	0.844162	1.31608	1.33937	1.52137	1.24872	1.55825
cluster6	AT1G29670	Carubv10009525	CARHR029020	Thhalv10008016	1.31753	0.696671	0.924023	1.34162	0.902904	0.788253	2.25653	1.75359	0.919445
cluster6	AT1G30000	Carubv10008589	CARHR029390	Thhalv10007084	0.898057	1.09088	0.788095	0.790791	0.961829	0.745401	1.19406	2.05711	0.497923
cluster6	AT1G30270	Carubv10012271	CARHR029660	Thhalv10007518	0.335877	1.03428	0.657509	0.087986	0.849384	0.72012	1.93948	0.588113	0.938842
cluster6	AT1G30640	Carubv10008728	CARHR030120	Thhalv10007242	1.37887	1.05272	0.894824	0.404371	1.22575	0.65789	1.98832	0.856387	1.18679
cluster6	AT1G30810	Carubv10008288	CARHR030280	Thhalv10006810	0.800524	1.17323	1.07567	0.277662	1.26081	0.926039	0.849259	0.42034	1.26002
cluster6	AT1G32460	Carubv10011572	CARHR031930	Thhalv10009227	0.538697	0.757402	0.935136	1.13771	1.59172	1.31081	0.60372	0.454809	0.914206
cluster6	AT1G32530	Carubv10008449	CARHR031980	Thhalv10006944	0.7915	0.987012	0.462855	-0.181586	0.397125	0.42268	1.31469	0.399088	0.471436
cluster6	AT1G33110	Carubv10008954	CARHR032430	Thhalv10007464	0.924437	1.16138	1.05166	0.681677	1.12091	0.992959	1.15549	1.7663	1.41201
cluster6	AT1G33475	Carubv10010089	CARHR032910	Thhalv10008489	0.380322	0.267657	0.947471	1.33682	0.862444	1.31592	2.14601	-0.536417	-0.0282456
cluster6	AT1G34180	Carubv10008706	CARHR033690	Thhalv10007196	1.28056	0.731574	0.31917	0.316261	0.391927	0.27026	2.18726	0.55969	1.29006
cluster6	AT1G34190	Carubv10008761	CARHR033700	Thhalv10007221	0.858916	0.995963	0.659668	0.321662	1.06205	0.772173	1.00991	0.677431	0.772468
cluster6	AT1G34370	Carubv10008876	CARHR033830	Thhalv10007411	1.25046	1.42829	1.32797	1.01777	1.52279	1.48314	1.70223	0.930558	0.836233
cluster6	AT1G35430	Carubv10010640	CARHR034200	Thhalv10001838	0.352669	0.222132	1.41383	1.57063	0.792112	1.81097	1.46085	0.509746	1.90303
cluster6	AT1G35580	Carubv10012014	CARHR034370	Thhalv10001814	0.348366	0.518683	0.300428	0.453211	0.59102	0.52951	1.35849	0.350367	0.325252
cluster6	AT1G35670	Carubv10008949	CARHR034460	Thhalv10001816	1.08134	1.01781	0.478571	0.430519	0.831981	0.558174	1.27554	1.05898	0.541491
cluster6	AT1G44350	Carubv10008915	CARHR035910	Thhalv10011458	0.166907	0.180687	0.879268	0.357357	2.21289	1.03977	1.73799	0.707767	0.00507393
cluster6	AT1G45180	Carubv10012632	CARHR036270	Thhalv10011314	0.838436	1.34822	0.763396	0.740417	1.2573	1.26235	0.68536	0.655256	0.787338
cluster6	AT1G47380	Carubv10009209	CARHR036930	Thhalv10011502	0.294527	0.939342	0.636807	0.493588	1.2141	0.278626	0.773129	0.800626	0.333207
cluster6	AT1G48040	Carubv10009425	CARHR037680	Thhalv10011569	0.84241	1.23212	0.886735	0.805789	1.2872	1.26886	1.67465	0.978627	0.577243
cluster6	AT1G48370	Carubv10008440	CARHR037980	Thhalv10011269	0.52173	0.505139	0.804662	0.41207	0.957647	1.21255	1.89361	0.107912	0.148486
cluster6	AT1G48850	Carubv10009182	CARHR038850	Thhalv10011486	0.622722	0.651568	0.41252	0.154774	0.773741	0.358513	0.797249	1.38646	0.8473
cluster6	AT1G49450	Carubv10008941	CARHR039460	Thhalv10011440	0.161729	1.89647	0.80971	-0.0121702	1.00835	0.0134256	1.26368	1.78591	2.28122
cluster6	AT1G50360	Carubv10008120	CARHR040370	Thhalv10011193	1.41255	2.04984	1.05327	0.331632	1.72652	1.10291	1.1758	0.796962	1.12224
cluster6	AT1G50640	Carubv10010284	CARHR040690	Thhalv10011689	0.773469	1.07066	1.13188	1.21728	1.48208	1.77028	0.729835	1.03271	1.2175
cluster6	AT1G51860	Carubv10008240	CARHR041990	Thhalv10011226	1.47133	1.07317	0.793083	0.217915	0.978671	0.877169	1.4851	0.699993	0.730624
cluster6	AT1G52330	Carubv10010254	CARHR042460	Thhalv10011771	0.0746534	0.350827	0.622076	0.640592	0.946266	0.793561	2.23059	0.5297	0.338426
cluster6	AT1G52780	Carubv10011888	CARHR042960	Thhalv10011203	1.22611	0.797019	0.267897	0.697865	0.159829	0.399719	1.11043	0.0601688	0.228656
cluster6	AT1G52857	Carubv10015041	CARHR043070	Thhalv10011870	-0.778167	0.0864608	0.161554	0.84111	1.17948	0.997417	1.53071	1.19029	0.640198
cluster6	AT1G53760	Carubv10009999	CARHR044070	Thhalv10011709	0.564365	0.0869648	0.453192	0.324967	0.362827	0.69149	1.22253	0.538624	0.485354
cluster6	AT1G53920	Carubv10009398	CARHR044230	Thhalv10011561	1.13804	1.09053	1.16741	1.05114	1.12527	1.70082	1.3331	0.523009	0.581444
cluster6	AT1G54090	Carubv10008575	CARHR044420	Thhalv10011317	0.567279	1.06019	0.770773	0.702795	1.07411	0.905031	1.41321	1.15678	1.78493
cluster6	AT1G54890	Carubv10020577	CARHR056070	Thhalv10023565	1.29121	0.880141	1.35673	0.533097	1.15542	1.55245	2.75666	1.61874	0.212272
cluster6	AT1G56145	Carubv10008183	CARHR045890	Thhalv10012006	0.862399	1.48025	0.521049	-0.120059	0.749832	0.751406	1.19164	1.01934	0.117818
cluster6	AT1G57560	Carubv10020714	CARHR054780	Thhalv10023601	1.11257	0.923008	0.591299	0.837186	0.409261	0.765302	1.12825	1.11973	1.49805
cluster6	AT1G57610	Carubv10020742	CARHR054670	Thhalv10023609	0.81862	0.712815	1.12855	0.647884	1.35592	1.94235	2.79876	0.329212	1.36569
cluster6	AT1G57700	Carubv10019892	CARHR054480	Thhalv10023319	0.557455	1.05177	1.17492	0.00944723	1.2375	1.03112	1.55772	0.700983	0.827842
cluster6	AT1G58340	Carubv10020211	CARHR284180	Thhalv10024168	0.387634	1.29704	0.0853052	0.500705	0.848983	0.485031	1.10993	1.07205	0.78669
cluster6	AT1G59740	Carubv10020041	CARHR053410	Thhalv10023363	1.41133	1.08653	0.910355	1.06174	1.10155	1.32784	1.31226	0.38621	-0.268052
cluster6	AT1G60030	Carubv10020111	CARHR052940	Thhalv10023405	1.59836	1.24013	1.37786	0.6848	0.506326	0.857076	2.24265	1.43582	0.82317
cluster6	AT1G61080	Carubv10021509	CARHR052240	Thhalv10023269	2.63084	0.795753	-0.238338	0.668515	0.55633	0.269127	1.47377	1.16743	0.84002
cluster6	AT1G61215	Carubv10020225	CARHR051450	Thhalv10023448	0.424994	1.17273	1.4068	0.831809	1.7049	0.54508	1.73081	0.416788	1.40389
cluster6	AT1G61260	Carubv10020573	CARHR051340	Thhalv10023538	1.05277	0.783962	1.83729	1.03059	1.74687	1.4512	1.16541	1.3413	0.149
cluster6	AT1G61415	Carubv10022268	CARHR051130	Thhalv10027967	1.38276	-0.31961	2.76033	1.82106	-0.98904	2.35456	1.22943	1.66396	-1.00027
cluster6	AT1G61660	Carubv10020420	CARHR050690	Thhalv10023487	1.35594	1.387	1.43008	1.02942	1.5196	1.30697	1.29829	0.836899	0.43992
cluster6	AT1G63500	Carubv10020201	CARHR047870	Thhalv10023428	1.19499	1.02851	0.973674	0.907459	1.06289	0.540946	0.799658	1.5988	1.32514
cluster6	AT1G63840	Carubv10021019	CARHR047330	Thhalv10023722	0.807297	0.820514	0.96756	1.59362	0.976944	1.23609	-0.0402698	1.91115	1.45012
cluster6	AT1G63930	Carubv10020366	CARHR047040	Thhalv10023488	1.27545	0.757691	0.518109	1.18506	1.02237	1.0955	2.68137	0.154541	0.430823
cluster6	AT1G64060	Carubv10021686	CARHR046890	Thhalv10023240	1.02616	1.02381	0.621769	-0.280534	0.563831	0.388192	1.14948	1.95702	1.35696
cluster6	AT1G64300	Carubv10021457	CARHR046660	Thhalv10023305	1.50119	0.604659	0.379529	0.68422	1.08554	0.891555	1.89651	-0.468081	-0.664898
cluster6	AT1G64700	Carubv10022047	CARHR046200	Thhalv10023888	0.71331	0.324861	0.029121	0.942031	1.21076	0.75914	0.791609	0.505645	1.23568
cluster6	AT1G64980	Carubv10020823	CARHR056380	Thhalv10019022	0.0417986	0.315992	0.644566	0.537308	0.893096	0.772928	1.39056	0.134344	1.6381
cluster6	AT1G65520	Carubv10020872	CARHR057230	Thhalv10019107	0.820088	0.40953	1.08604	0.896081	0.635654	1.5232	1.10872	0.486115	0.350001
cluster6	AT1G65540	Carubv10021982	CARHR057250	Thhalv10018184	0.9913	1.22058	0.788812	-0.36845	0.585358	1.02789	1.35153	0.203689	0.967382
cluster6	AT1G65610	Carubv10019972	CARHR057380	Thhalv10018270	1.72772	1.443	0.576666	0.647917	0.894262	0.976095	2.02227	1.75551	0.790569
cluster6	AT1G65730	Carubv10019889	CARHR057590	Thhalv10018216	1.13519	0.861703	0.576045	2.13057	0.701553	0.601593	1.82101	0.234093	0.394786
cluster6	AT1G65820	Carubv10021117	CARHR057680	Thhalv10027981	0.225492	0.293756	0.872775	0.813257	0.887585	1.08632	0.915414	-0.106706	1.40547
cluster6	AT1G66260	Carubv10020732	CARHR058200	Thhalv10018970	0.296863	0.837649	0.721032	0.646562	1.26805	0.904115	0.633417	0.712998	0.783849
cluster6	AT1G66340	Carubv10019861	CARHR058220	Thhalv10018186	0.878872	1.07087	0.688024	0.570613	1.11084	0.948297	1.2693	-0.141422	0.692107
cluster6	AT1G66900	Carubv10020782	CARHR059060	Thhalv10018994	0.291237	0.575745	0.697431	0.505428	0.716741	0.65012	1.22833	0.857853	1.11918
cluster6	AT1G67050	Carubv10020794	CARHR059460	Thhalv10019003	0.0712717	0.486104	-0.0330999	0.813885	0.897549	0.842852	1.16093	1.19356	1.2681
cluster6	AT1G67190	Carubv10020360	CARHR059640	Thhalv10018615	0.662729	0.866015	0.982162	0.861003	1.28345	0.887274	0.565343	0.607124	0.799664
cluster6	AT1G67310	Carubv10022369	CARHR059790	Thhalv10018053	1.21525	1.69679	0.897227	0.144055	1.21798	0.969624	1.52632	-0.245015	1.14552
cluster6	AT1G67800	Carubv10021966	CARHR060430	Thhalv10019546	1.51376	1.4903	1.51503	0.77531	0.696131	1.40127	2.80389	0.802716	-0.174509
cluster6	AT1G68370	Carubv10020380	CARHR061120	Thhalv10018636	0.252032	0.732608	0.330763	0.055279	0.628368	0.44084	1.02125	0.383785	0.498399
cluster6	AT1G69270	Carubv10021478	CARHR062140	Thhalv10018335	1.18244	1.12222	0.755424	1.19377	1.20313	1.04253	2.14637	0.679872	0.964795
cluster6	AT1G69520	Carubv10021977	CARHR062450	Thhalv10019583	1.48584	0.961065	1.3088	1.18394	1.52819	1.5003	1.13991	2.5011	-0.219847
cluster6	AT1G69750	Carubv10021152	CARHR062820	Thhalv10019223	0.359836	1.69013	1.34003	1.08416	0.803298	2.0555	0.945693	0.505686	0.582104
cluster6	AT1G69910	Carubv10019905	CARHR062990	Thhalv10018260	0.434385	0.711221	1.45153	1.15702	1.03113	1.7674	2.08635	0.785155	-0.29829
cluster6	AT1G70410	Carubv10022362	CARHR063580	Thhalv10018978	0.579504	1.15342	1.08801	1.15361	2.16669	1.5963	0.734788	0.567535	1.02367
cluster6	AT1G70590	Carubv10020524	CARHR063810	Thhalv10018848	0.460944	0.753876	0.616316	0.913578	0.852055	0.827761	1.2843	1.53566	1.22951
cluster6	AT1G70690	Carubv10020594	CARHR063950	Thhalv10019845	1.30694	0.540651	1.35569	1.07799	1.03351	1.52483	0.877419	0.634891	2.81727
cluster6	AT1G70750	Carubv10019836	CARHR064010	Thhalv10018172	1.21063	1.28591	0.961083	-0.0135351	1.57573	1.29089	1.28543	1.3185	0.122635
cluster6	AT1G71110	Carubv10020087	CARHR064400	Thhalv10018709	0.779488	1.42999	0.371729	-0.394127	0.536972	0.596126	1.10337	2.15811	1.01659
cluster6	AT1G71530	Carubv10019921	CARHR291160	Thhalv10018253	1.46487	2.3164	-0.219932	0.131531	0.444281	0.530474	2.20108	1.14349	0.814011
cluster6	AT1G71940	Carubv10020785	CARHR064770	Thhalv10018999	0.744686	0.338607	0.511008	0.601062	0.511951	0.811621	0.600272	1.06502	0.420377
cluster6	AT1G71950	Carubv10022211	CARHR064760	Thhalv10019318	0.256436	0.409262	0.785886	0.891574	0.821673	1.29596	0.780788	0.675037	0.55373
cluster6	AT1G72010	Carubv10022457	CARHR064820	Thhalv10018667	1.01317	1.02041	1.14407	1.55769	1.4619	1.34316	1.10089	0.619995	0.673993
cluster6	AT1G73030	Carubv10020963	CARHR066000	Thhalv10019148	0.745374	0.867814	1.14801	1.15927	1.3755	1.39852	1.4332	0.738331	0.70655
cluster6	AT1G73500	Carubv10020687	CARHR066520	Thhalv10019452	1.20724	0.551045	1.14712	0.667975	1.14554	2.04769	0.808765	0.223851	0.517272
cluster6	AT1G73540	Carubv10020817	CARHR066540	Thhalv10019174	0.691063	1.21735	1.1606	0.710441	1.83007	1.92039	0.78151	0.990742	1.99751
cluster6	AT1G73730	Carubv10020043	CARHR066800	Thhalv10018327	0.997199	1.28972	0.891968	0.600253	1.0321	1.04176	1.31186	0.870139	0.901113
cluster6	AT1G74380	Carubv10020269	CARHR067640	Thhalv10018522	0.670102	0.831429	0.652638	0.690938	0.589341	0.726411	1.08623	0.5661	0.495076
cluster6	AT1G74440	Carubv10020930	CARHR067710	Thhalv10019143	1.29968	0.629305	1.39671	1.4122	1.18656	1.83639	0.198695	0.847093	1.59704
cluster6	AT1G74490	Carubv10020458	CARHR067770	Thhalv10019838	0.352837	0.922388	0.608831	0.517957	1.28687	0.529053	1.62941	0.349357	0.867695
cluster6	AT1G74710	Carubv10020059	CARHR068010	Thhalv10018346	0.728707	2.30406	1.02111	1.25334	1.21066	0.927294	2.57402	0.299072	1.11949
cluster6	AT1G75860	Carubv10020695	CARHR069410	Thhalv10019693	0.141685	1.53152	0.926327	0.823993	0.786699	1.03488	1.10444	0.559937	0.671386
cluster6	AT1G76250	Carubv10021873	CARHR069810	Thhalv10018564	0.103605	0.238901	0.807738	1.22759	0.319574	1.33068	2.5496	-0.483318	0.869663
cluster6	AT1G77250	Carubv10020138	CARHR070720	Thhalv10018403	0.53723	1.34231	0.6764	0.324521	1.03269	0.574744	0.907067	0.317505	0.538027
cluster6	AT1G77390	Carubv10020219	CARHR070870	Thhalv10018521	1.00931	1.7071	1.54444	0.759251	1.19143	0.032775	0.227557	1.75558	1.44873
cluster6	AT1G77420	Carubv10020464	CARHR070910	Thhalv10018704	0.195914	1.30815	0.363733	0.227801	0.840438	0.476127	0.711992	-0.0827732	1.05428
cluster6	AT1G77810	Carubv10021555	CARHR071310	Thhalv10018693	0.482602	3.64101	0.776237	0.396976	1.31029	0.72856	0.916106	0.523239	1.38632
cluster6	AT1G78210	Carubv10020680	CARHR071680	Thhalv10018907	0.865628	1.03338	1.07345	1.36386	1.64632	1.83078	0.431818	0.256362	1.62363
cluster6	AT1G78280	Carubv10019734	CARHR071750	Thhalv10018079	0.83629	0.917082	0.603702	0.386217	0.627235	0.726034	0.855402	1.76271	1.17613
cluster6	AT1G78310	Carubv10021365	CARHR071780	Thhalv10018916	0.559463	1.09403	0.725473	1.2729	1.21044	1.68301	1.86212	1.2335	0.594719
cluster6	AT1G79180	Carubv10020691	CARHR072820	Thhalv10018933	1.54997	0.659227	0.495108	0.265388	1.13931	0.964442	2.06286	1.49395	0.602463
cluster6	AT1G79590	Carubv10020885	CARHR073320	Thhalv10019084	0.441117	0.389108	0.767581	0.670832	1.1613	0.962094	0.814997	0.850387	0.312098
cluster6	AT1G80460	Carubv10020141	CARHR074790	Thhalv10018399	1.03645	1.13512	0.6237	0.39169	0.882124	0.704376	1.31108	0.51233	0.762642
cluster6	AT1G80920	Carubv10021065	CARHR073560	Thhalv10019250	0.340797	0.901661	0.599738	1.19566	1.60433	0.661302	0.772794	0.56241	1.01702
cluster6	AT2G01430	Carubv10017961	CARHR143950	Thhalv10001113	0.338257	0.456854	1.60503	0.282174	1.27751	1.01642	1.58356	0.744832	0.573082
cluster6	AT2G01540	Carubv10018104	CARHR144090	Thhalv10004998	0.433599	0.0684501	0.60149	0.783253	0.897496	0.824242	0.864439	1.24385	1.99116
cluster6	AT2G01600	Carubv10018506	CARHR144150	Thhalv10003910	0.449867	0.93391	0.342831	0.773738	1.72165	1.27987	2.36032	1.25262	0.36782
cluster6	AT2G01650	Carubv10017174	CARHR144220	Thhalv10004151	1.17356	1.23921	0.940994	1.0161	1.30282	1.21365	1.0549	0.889423	0.745748
cluster6	AT2G01690	Carubv10019393	CARHR144260	Thhalv10003708	0.493845	0.793555	0.335342	0.116939	0.875543	0.416514	1.12407	0.404881	1.48021
cluster6	AT2G01880	Carubv10018405	CARHR144440	Thhalv10004597	0.832686	-0.119553	0.933693	0.247192	1.02614	0.433021	2.00504	0.411538	0.595851
cluster6	AT2G02230	Carubv10017527	CARHR144890	Thhalv10004545	0.571237	0.287244	0.251293	0.508945	0.344115	0.864573	1.49759	0.790051	-0.00402286
cluster6	AT2G02730	Carubv10017692	CARHR145160	Thhalv10004758	0.490807	0.720922	0.607891	0.608907	1.1383	1.23664	1.91078	0.499859	0.498469
cluster6	AT2G02810	Carubv10017499	CARHR145250	Thhalv10004564	0.41705	0.541125	0.286018	0.398078	0.362795	0.508448	1.53558	0.711533	0.859907
cluster6	AT2G03240	Carubv10016686	CARHR145570	Thhalv10003656	0.910302	1.36075	0.699989	0.746038	1.01619	0.624524	1.28142	0.0595123	2.55499
cluster6	AT2G03470	Carubv10019121	CARHR145820	Thhalv10005386	0.374384	0.744593	0.688897	0.355243	0.792987	0.752502	1.80327	0.414816	0.436202
cluster6	AT2G04305	Carubv10016267	CARHR102180	Thhalv10002529	0.649204	0.930421	0.828819	0.789439	1.15789	1.13484	1.33403	1.31123	1.40999
cluster6	AT2G04400	Carubv10013857	CARHR102260	Thhalv10002557	1.47283	1.01163	1.54966	0.485141	1.92508	1.39892	2.3256	0.42526	0.826625
cluster6	AT2G12400	Carubv10016344	CARHR105020	Thhalv10022640	0.362844	0.778976	0.521537	0.364435	0.734032	0.37757	1.32519	0.697957	0.160014
cluster6	AT2G16500	Carubv10013090	CARHR106720	Thhalv10022578	1.33383	-0.0149502	0.945897	1.09255	0.899344	2.12857	2.42915	0.135722	1.68714
cluster6	AT2G16720	Carubv10014371	CARHR106950	Thhalv10022799	0.956591	1.41281	1.28714	1.02189	1.71777	0.8885	0.563227	0.838109	1.13621
cluster6	AT2G17130	Carubv10013986	CARHR293450	Thhalv10022743	1.11551	0.522329	0.626518	0.721872	0.851333	1.10991	0.910022	0.923251	0.382298
cluster6	AT2G17420	Carubv10013889	CARHR107590	Thhalv10022728	0.478731	0.573349	0.802076	0.732051	1.25895	1.34799	1.34414	0.765324	1.35235
cluster6	AT2G17720	Carubv10014309	CARHR108010	Thhalv10022796	1.30107	0.784417	0.977379	0.74954	1.33568	1.31668	1.30386	1.28022	0.500015
cluster6	AT2G17840	Carubv10013699	CARHR108340	Thhalv10022685	0.859161	0.928494	0.53994	0.607158	0.602644	-0.0203935	0.00824976	0.953814	1.08086
cluster6	AT2G18090	Carubv10012971	CARHR108570	Thhalv10022555	1.23027	1.53657	1.02867	0.651223	1.35076	1.15	1.42008	0.840036	1.06555
cluster6	AT2G18100	Carubv10013157	CARHR108580	Thhalv10022586	0.184707	0.615791	1.0778	0.117685	0.510435	0.746772	1.69141	0.325026	0.251128
cluster6	AT2G18150	Carubv10015891	CARHR108630	Thhalv10022774	0.512213	1.06346	1.00674	0.352792	1.43205	0.859015	1.43026	0.192291	1.71058
cluster6	AT2G19160	Carubv10013892	CARHR109640	Thhalv10022718	0.763161	1.06953	1.06921	0.893518	1.39227	1.10026	2.45626	1.09215	1.08939
cluster6	AT2G20370	Carubv10013229	CARHR110900	Thhalv10001932	1.1661	1.19512	0.758652	0.833593	1.01115	1.16707	0.556744	0.974356	1.07661
cluster6	AT2G21510	Carubv10023340	CARHR112430	Thhalv10000223	1.34576	0.616763	0.309127	0.291986	0.20341	0.826054	1.37787	0.677172	1.79397
cluster6	AT2G21520	Carubv10025610	CARHR112450	Thhalv10000082	0.962695	1.39572	0.66969	0.165446	0.916759	0.362435	1.21443	0.916067	0.205457
cluster6	AT2G21550	Carubv10023109	CARHR112490	Thhalv10000156	0.567725	0.384085	0.492456	0.529456	0.759606	0.707859	0.824229	0.155832	1.40467
cluster6	AT2G21780	Carubv10024339	CARHR112830	Thhalv10000578	1.77697	0.493482	1.61869	1.82516	0.694266	1.65244	2.21713	0.299092	0.42673
cluster6	AT2G22010	Carubv10022522	CARHR113090	Thhalv10000015	0.937735	1.14818	0.772446	-0.0609953	0.805947	0.73988	0.698066	0.583157	0.662989
cluster6	AT2G22475	Carubv10005323	CARHR113670	Thhalv10000257	0.556063	0.710016	0.711343	0.776956	1.06975	0.689927	0.918625	0.679357	0.554438
cluster6	AT2G22850	Carubv10024747	CARHR114160	Thhalv10000309	0.1245	0.30436	1.17772	0.464083	0.844576	0.927095	1.84427	0.4143	0.462779
cluster6	AT2G23300	Carubv10022687	CARHR292940	Thhalv10000055	1.16022	1.10153	0.915846	1.32944	1.25568	1.11814	1.53667	0.221359	0.649744
cluster6	AT2G23420	Carubv10022829	CARHR293030	Thhalv10000109	1.01165	1.22414	0.858012	0.909856	1.34746	0.871985	2.19101	0.277348	0.257721
cluster6	AT2G23910	Carubv10023711	CARHR184880	Thhalv10000263	2.03596	0.641591	0.414945	0.409379	0.973584	0.785755	3.05917	0.203411	0.4459
cluster6	AT2G24430	Carubv10025508	CARHR117630	Thhalv10000520	0.772427	0.29664	0.227295	-0.375943	0.8548	0.623754	1.81939	1.27136	0.55939
cluster6	AT2G24860	Carubv10024166	CARHR116800	Thhalv10000367	0.611936	0.738757	1.01184	0.779927	1.65	1.3731	1.15907	0.947984	1.07119
cluster6	AT2G25260	Carubv10023508	CARHR116280	Thhalv10000212	0.471792	1.36794	1.18137	0.274076	1.02894	0.437325	0.796476	1.68771	0.15452
cluster6	AT2G26290	Carubv10023277	CARHR115130	Thhalv10002290	1.47031	1.10043	1.03381	0.183799	0.897636	1.36677	1.4802	0.00789363	-0.359065
cluster6	AT2G26300	Carubv10023418	CARHR115230	Thhalv10002013	0.84495	0.904957	0.900913	0.636048	0.986826	0.79817	1.73766	-0.139968	1.36713
cluster6	AT2G26650	Carubv10025578	CARHR118540	Thhalv10001904	1.34266	1.55148	0.987162	0.525145	1.09545	1.10475	2.29416	1.13649	0.448567
cluster6	AT2G27080	Carubv10023872	CARHR119400	Thhalv10002079	1.34073	1.36182	0.900614	1.10858	1.53068	1.3357	1.48895	1.72811	0.463214
cluster6	AT2G27580	Carubv10023955	CARHR121460	Thhalv10017328	0.755158	0.628278	1.272	1.08429	1.24004	1.74647	1.07549	0.464608	-0.024179
cluster6	AT2G27830	Carubv10024088	CARHR120530	Thhalv10017255	0.612615	1.07437	0.755632	1.05282	1.20853	1.34702	1.41643	1.87498	1.08605
cluster6	AT2G28080	Carubv10023101	CARHR120810	Thhalv10016590	0.752471	0.905343	0.938229	0.765616	1.28298	1.28382	1.02302	0.0674809	1.00327
cluster6	AT2G28940	Carubv10023166	CARHR122110	Thhalv10017635	0.817211	0.928241	1.20744	0.813331	1.65225	1.38053	2.0055	0.968884	0.883671
cluster6	AT2G30140	Carubv10023179	CARHR123460	Thhalv10016641	2.15994	0.262252	0.452256	1.93872	2.20554	0.69444	-0.131703	2.15103	1.06467
cluster6	AT2G30395	Carubv10024641	CARHR123750	Thhalv10017867	1.75129	0.397321	0.570276	0.222717	0.851354	0.549672	0.677498	1.09086	-0.298797
cluster6	AT2G31810	Carubv10023086	CARHR125500	Thhalv10016569	0.617159	0.989533	0.728065	0.632491	0.980703	0.71253	1.03683	0.700756	0.205767
cluster6	AT2G31820	Carubv10022790	CARHR125510	Thhalv10016361	0.968423	1.22682	0.810158	0.317043	0.803905	0.755043	1.06731	0.492462	0.14261
cluster6	AT2G31870	Carubv10022947	CARHR125560	Thhalv10016696	0.837194	0.958751	0.698641	0.250452	1.10622	-0.0181347	1.09106	0.741502	1.06747
cluster6	AT2G32235	Carubv10023708	CARHR126020	Thhalv10016999	1.25743	0.267484	1.27783	0.0979659	0.826653	1.96317	2.69709	-0.276296	-0.0132233
cluster6	AT2G32270	Carubv10025062	CARHR126070	Thhalv10016884	0.450369	0.95447	0.511592	0.475892	0.748192	1.06564	2.99336	0.00178726	-0.263233
cluster6	AT2G32380	Carubv10024187	CARHR126200	Thhalv10017325	0.310396	0.367928	0.823748	1.08269	0.848731	1.3506	1.20196	0.223146	0.0662873
cluster6	AT2G32830	Carubv10025365	CARHR126780	Thhalv10016483	0.582537	0.0285742	0.352049	0.865977	0.469283	1.20935	0.843774	1.45021	0.812049
cluster6	AT2G33100	Carubv10022555	CARHR127100	Thhalv10016169	2.37008	-0.859976	1.4847	0.630242	0.202141	0.635494	1.30258	0.281791	1.32066
cluster6	AT2G33390	Carubv10024392	CARHR127400	Thhalv10017471	0.853396	0.926164	0.994671	0.996866	1.47796	1.27801	1.0961	0.942809	0.787581
cluster6	AT2G33480	Carubv10023833	CARHR127490	Thhalv10017152	0.840968	0.450064	0.703574	1.20122	1.28998	1.41547	0.402861	2.624	1.76372
cluster6	AT2G33540	Carubv10025216	CARHR127550	Thhalv10016157	0.682491	1.06994	0.551224	0.0143595	0.501361	0.653946	0.443908	0.493969	0.788933
cluster6	AT2G33590	Carubv10023695	CARHR127620	Thhalv10017002	0.649982	0.681136	0.62406	0.510968	0.591889	0.968648	1.98872	-0.176628	-0.153027
cluster6	AT2G34250	Carubv10023123	CARHR128340	Thhalv10016599	0.835834	0.958219	0.790234	0.68332	1.18972	1.14824	1.32208	0.507515	0.427493
cluster6	AT2G34790	Carubv10022971	CARHR128950	Thhalv10016496	2.30988	1.38016	0.442487	0.266876	1.34038	0.257747	1.78421	1.33336	0.64314
cluster6	AT2G34910	Carubv10025643	CARHR129060	Thhalv10017016	0.912777	0.766307	0.733171	0.362314	1.37146	0.707657	1.75479	1.82769	0.587761
cluster6	AT2G34940	Carubv10024993	CARHR129110	Thhalv10016381	0.621249	0.686131	0.517697	-0.195824	1.01039	1.08244	0.487216	2.19777	2.10966
cluster6	AT2G35170	Carubv10023076	CARHR129330	Thhalv10017682	0.549498	1.25128	0.622766	0.463133	1.46991	0.871058	1.5526	0.723667	1.36046
cluster6	AT2G35270	Carubv10025435	CARHR129430	Thhalv10017027	0.279255	0.390993	0.697333	0.548706	0.656199	0.765216	0.789328	1.13423	-0.324201
cluster6	AT2G35390	Carubv10023348	CARHR129550	Thhalv10016745	0.821465	1.4344	0.88567	0.611524	1.92287	0.942818	2.35661	0.248279	-0.366542
cluster6	AT2G35610	Carubv10022808	CARHR129800	Thhalv10016368	0.813806	1.02808	0.6355	0.607881	0.962306	0.829842	1.1215	0.991902	1.19326
cluster6	AT2G35770	Carubv10023157	CARHR130020	Thhalv10016610	0.750383	0.844559	0.789781	0.8081	0.660041	1.11821	0.881982	1.09051	0.672655
cluster6	AT2G36300	Carubv10023901	CARHR130570	Thhalv10017131	0.527641	0.415607	0.741913	1.13964	0.863767	1.25129	1.08997	0.600806	0.496118
cluster6	AT2G36310	Carubv10023574	CARHR130600	Thhalv10016893	0.675277	0.600531	0.343298	0.462483	0.752384	0.514951	1.12453	0.874369	0.267004
cluster6	AT2G36320	Carubv10024192	CARHR130610	Thhalv10017322	0.526722	0.601881	0.72013	1.11993	1.14458	1.2377	2.0902	1.46275	1.5062
cluster6	AT2G36330	Carubv10023779	CARHR130620	Thhalv10017222	1.07957	0.709952	0.987258	1.0654	0.894442	1.11028	0.975072	0.485439	-0.0625855
cluster6	AT2G36680	Carubv10024035	CARHR130970	Thhalv10017224	0.440358	0.775012	0.95647	0.883917	1.20975	1.60273	1.4527	0.706939	0.114221
cluster6	AT2G37150	Carubv10022961	CARHR131660	Thhalv10016485	0.826356	0.857604	0.685813	0.315877	1.17484	0.95985	2.38487	1.0112	0.108355
cluster6	AT2G37550	Carubv10023020	CARHR132060	Thhalv10016645	0.507011	0.898615	0.494875	0.415921	0.634119	0.552974	1.02725	0.563232	0.49651
cluster6	AT2G37970	Carubv10024529	CARHR132520	Thhalv10017151	0.79119	0.566329	0.725515	0.628233	1.22615	0.760625	0.54677	0.244525	1.68014
cluster6	AT2G38410	Carubv10022769	CARHR133030	Thhalv10016346	0.447592	1.35895	0.344426	0.455823	0.816151	0.783455	2.35884	0.505268	0.540702
cluster6	AT2G38500	Carubv10023522	CARHR133200	Thhalv10016859	0.392332	0.818832	1.02416	0.918982	0.835293	1.27522	1.9492	1.58488	0.733432
cluster6	AT2G38610	Carubv10023665	CARHR133280	Thhalv10017040	0.260154	0.381962	0.669985	0.512952	0.905203	1.00093	1.4051	0.419175	0.508778
cluster6	AT2G38740	Carubv10023919	CARHR133430	Thhalv10017141	0.591122	0.324848	0.698783	0.487081	0.728696	0.607275	1.52715	1.46463	0.471766
cluster6	AT2G39360	Carubv10025380	CARHR134150	Thhalv10016254	1.23876	0.77683	0.775335	0.801985	0.747439	0.666189	1.72096	2.30441	0.0487541
cluster6	AT2G39435	Carubv10023163	CARHR134280	Thhalv10016572	1.01504	0.993215	0.865454	0.5336	0.897448	0.714173	2.12751	1.20628	1.03323
cluster6	AT2G39480	Carubv10025368	CARHR134350	Thhalv10016145	0.898638	1.86697	1.12633	0.816197	1.55589	1.54474	1.46064	0.774009	1.18291
cluster6	AT2G39550	Carubv10025181	CARHR134420	Thhalv10016771	0.265578	0.847312	0.696987	0.395392	0.647696	0.46611	0.730425	1.03502	0.253765
cluster6	AT2G39720	Carubv10023378	CARHR134560	Thhalv10016765	0.560293	0.566917	0.47067	1.11988	0.636881	0.945991	0.561764	0.975842	1.00444
cluster6	AT2G39770	Carubv10023461	CARHR134630	Thhalv10016850	0.459385	1.36862	0.792345	0.849614	1.35411	1.09965	1.18712	0.572989	0.613566
cluster6	AT2G40090	Carubv10022955	CARHR135050	Thhalv10016489	0.86927	1.35041	1.02478	0.638944	1.44939	1.16603	0.97878	0.899702	1.0227
cluster6	AT2G40110	Carubv10024314	CARHR135080	Thhalv10017415	1.02084	1.18172	0.72376	1.29021	1.69854	1.28798	0.491669	0.371582	0.738257
cluster6	AT2G41070	Carubv10023893	CARHR136180	Thhalv10017050	0.208814	1.06809	0.929492	0.294937	1.36943	0.970463	0.878188	1.09254	0.0532751
cluster6	AT2G41160	Carubv10023778	CARHR136250	Thhalv10017035	0.463588	0.506571	1.24005	0.981837	0.842492	1.411	1.5843	0.900066	0.273055
cluster6	AT2G41410	Carubv10024577	CARHR136520	Thhalv10017207	0.592892	0.614266	1.01313	1.16231	1.38974	2.03943	1.86022	1.24577	0.305141
cluster6	AT2G41630	Carubv10023678	CARHR136720	Thhalv10016972	0.415593	0.591013	0.586832	0.549368	0.799749	0.879833	1.89875	0.83172	0.47205
cluster6	AT2G42010	Carubv10025073	CARHR137110	Thhalv10006647	0.86078	1.17577	0.528675	0.263841	0.548161	0.705409	1.18354	0.369673	0.146926
cluster6	AT2G43140	Carubv10023683	CARHR138210	Thhalv10016998	0.657379	0.175323	0.645333	0.283684	0.402186	1.17032	1.39345	0.765345	0.609505
cluster6	AT2G43160	Carubv10022603	CARHR138230	Thhalv10001304	1.0379	1.08983	0.770346	0.711932	0.865638	1.20359	1.04158	1.08872	0.693371
cluster6	AT2G43790	Carubv10023366	CARHR138970	Thhalv10001439	0.144826	0.714968	0.606143	0.574576	0.921222	0.704067	0.722798	0.79945	1.12769
cluster6	AT2G44010	Carubv10024778	CARHR139190	Thhalv10001750	0.928746	0.862638	0.975704	1.13191	1.56991	1.25157	2.33572	0.749688	0.672593
cluster6	AT2G44080	Carubv10024269	CARHR139250	Thhalv10001780	0.954984	0.324623	0.589377	0.232374	0.0563446	1.20334	0.57412	0.746734	0.802075
cluster6	AT2G44180	Carubv10023245	CARHR139340	Thhalv10001459	0.60515	0.833854	0.930952	0.559527	0.692245	0.797559	1.10978	1.11494	2.19375
cluster6	AT2G44200	Carubv10023005	CARHR139360	Thhalv10001457	0.568576	1.25254	0.857456	0.0733711	1.2279	1.33129	0.730139	0.57613	0.617725
cluster6	AT2G44410	Carubv10023334	CARHR139570	Thhalv10001730	0.75283	0.838553	1.29204	1.37157	1.8612	1.47063	1.76526	0.778318	0.758858
cluster6	AT2G44430	Carubv10024727	CARHR139590	Thhalv10001779	0.326466	0.936119	0.5075	0.194025	0.733154	0.397245	1.20902	0.625317	0.625369
cluster6	AT2G44500	Carubv10022909	CARHR139680	Thhalv10001372	0.505517	1.85481	0.830588	0.147637	1.61413	1.0968	1.22433	0.667228	1.03458
cluster6	AT2G44970	Carubv10023043	CARHR140200	Thhalv10001413	0.838444	1.03318	0.830687	0.613119	1.25709	1.04588	1.06886	0.425612	0.0959683
cluster6	AT2G45010	Carubv10023936	CARHR140270	Thhalv10001602	0.686683	0.919388	0.919466	0.86202	1.00449	1.10031	1.27127	0.394422	0.369561
cluster6	AT2G45300	Carubv10023012	CARHR140500	Thhalv10001404	0.964413	1.15728	0.743945	0.618296	1.32804	1.04566	0.970365	1.3342	0.635024
cluster6	AT2G46260	Carubv10022924	CARHR141530	Thhalv10001385	0.76141	1.58585	0.999902	0.94368	2.01494	1.27427	2.03383	0.680517	1.21914
cluster6	AT2G46320	Carubv10023475	CARHR141600	Thhalv10001514	0.270371	0.830047	0.724753	0.133825	1.6752	0.959909	1.88933	2.24455	1.48823
cluster6	AT2G46650	Carubv10024306	CARHR142000	Thhalv10001679	0.476502	-0.605524	0.535415	0.166031	1.52458	1.1756	1.95494	-0.183351	1.17154
cluster6	AT2G46990	Carubv10024162	CARHR142360	Thhalv10001719	-0.469182	1.49071	1.63892	0.865223	2.5201	1.43145	2.11215	-0.470686	-0.388783
cluster6	AT2G47260	Carubv10023565	CARHR142660	Thhalv10001802	0.0712539	0.532214	0.635099	0.574864	1.10726	1.20521	0.739503	0.912142	1.49929
cluster6	AT2G47490	Carubv10023674	CARHR142890	Thhalv10001547	0.486877	0.525724	0.653516	0.257455	0.685649	0.961651	1.11271	1.38871	0.714831
cluster6	AT3G01040	Carubv10013435	CARHR076030	Thhalv10020487	0.765317	0.576637	0.507901	0.0653568	0.6726	0.412378	1.08874	0.610428	0.0750322
cluster6	AT3G01720	Carubv10012992	CARHR075200	Thhalv10020079	1.11577	0.999083	0.438911	0.17588	0.639758	0.548262	0.865459	0.705632	0.428445
cluster6	AT3G01990	Carubv10013759	CARHR074960	Thhalv10020734	1.43667	2.32942	0.414468	0.592139	2.11275	-0.0466884	1.49257	0.931747	0.297314
cluster6	AT3G02140	Carubv10015638	CARHR076110	Thhalv10021165	1.1555	0.433155	1.03333	0.695748	1.16607	1.18688	1.34951	0.808106	0.058848
cluster6	AT3G02230	Carubv10014051	CARHR076200	Thhalv10021014	0.377934	0.599581	0.19365	0.539432	0.409388	0.627996	1.35521	1.17591	0.732043
cluster6	AT3G02340	Carubv10013815	CARHR076320	Thhalv10020821	0.598483	0.881686	0.605496	0.948286	0.950775	0.815597	1.15821	0.697872	0.529821
cluster6	AT3G02770	Carubv10015490	CARHR076780	Thhalv10021668	0.659043	0.537353	1.10505	0.953358	1.20293	1.47789	1.75107	0.347001	0.199166
cluster6	AT3G03110	Carubv10012871	CARHR077130	Thhalv10019949	1.47885	1.38647	1.03231	0.662203	1.49346	1.33987	0.0549544	1.22354	1.0362
cluster6	AT3G03440	Carubv10013846	CARHR077460	Thhalv10020852	1.29731	1.6363	0.946184	0.688195	1.18682	-0.018267	1.67742	2.01391	0.263765
cluster6	AT3G03610	Carubv10014187	CARHR077650	Thhalv10021157	0.80065	0.839285	0.706233	0.579875	0.910377	0.847634	1.80376	1.22088	0.774876
cluster6	AT3G03740	Carubv10013733	CARHR077790	Thhalv10020746	0.388239	0.551664	0.462991	0.183066	0.517064	0.632393	1.18538	0.0745107	0.782508
cluster6	AT3G04060	Carubv10014118	CARHR078180	Thhalv10021125	0.651213	0.480648	0.385564	0.442161	0.603645	0.636342	1.198	1.24143	1.7596
cluster6	AT3G04240	Carubv10012900	CARHR078390	Thhalv10019996	0.599378	1.05227	0.592885	0.165502	0.852892	0.574631	1.20452	0.837671	0.691433
cluster6	AT3G04580	Carubv10013030	CARHR078760	Thhalv10020124	0.935678	0.982929	0.417698	0.231802	0.496035	0.608201	1.55121	0.297211	0.554941
cluster6	AT3G05050	Carubv10013293	CARHR079380	Thhalv10020353	0.927967	0.714277	0.401491	-0.147057	0.879312	0.543549	1.71996	0.842104	0.15333
cluster6	AT3G05320	Carubv10013656	CARHR079660	Thhalv10020752	0.877539	0.956697	1.55935	0.948162	1.56532	1.7299	2.45289	1.45271	-0.246367
cluster6	AT3G05500	Carubv10014487	CARHR079890	Thhalv10021402	0.311101	0.347487	0.46743	0.580713	0.475618	0.829416	1.22867	0.362629	0.360705
cluster6	AT3G05545	Carubv10013757	CARHR079940	Thhalv10020788	0.462987	0.748084	0.660067	0.787401	0.958057	1.10101	0.655038	0.881562	0.731945
cluster6	AT3G05650	Carubv10012954	CARHR080100	Thhalv10000044	1.1281	1.62437	0.727819	1.33338	0.243889	1.09999	0.39194	1.82925	0.551579
cluster6	AT3G05670	Carubv10012943	CARHR080110	Thhalv10020032	0.682808	1.38241	0.509011	0.0559635	0.448555	0.699486	0.967166	0.590007	0.556733
cluster6	AT3G05710	Carubv10014167	CARHR080160	Thhalv10021138	0.495105	0.814399	0.595363	0.434466	0.857119	0.854421	1.02723	0.504598	-0.0818623
cluster6	AT3G05990	Carubv10013460	CARHR080500	Thhalv10020522	0.35236	0.699491	0.531893	0.472328	0.905914	0.832815	0.71578	1.19578	0.855321
cluster6	AT3G06300	Carubv10014146	CARHR080800	Thhalv10021226	0.852849	1.2834	1.03205	1.10038	1.87254	1.20783	1.45058	0.621657	0.950918
cluster6	AT3G06420	Carubv10014774	CARHR080950	Thhalv10021784	0.507214	0.574611	0.470367	0.623682	1.38863	0.762447	2.23051	1.31504	1.04619
cluster6	AT3G06780	Carubv10015206	CARHR081420	Thhalv10022432	0.322735	0.766936	0.920476	1.15136	1.53174	1.41096	1.36395	1.40586	1.5083
cluster6	AT3G07090	Carubv10014398	CARHR081680	Thhalv10021308	0.882006	0.0961078	0.976792	0.295128	0.671943	1.14353	1.33176	0.578729	0.346221
cluster6	AT3G07270	Carubv10013638	CARHR081920	Thhalv10020678	0.509755	0.326232	0.635289	0.434793	0.630615	0.734761	0.395935	0.738948	1.03269
cluster6	AT3G07370	Carubv10014352	CARHR082020	Thhalv10021313	0.80319	1.09752	1.01209	0.81702	1.25762	1.08115	1.09955	1.26302	0.68653
cluster6	AT3G07570	Carubv10013985	CARHR082270	Thhalv10020960	0.923731	0.523745	0.425596	0.660323	0.582754	0.613673	1.07065	0.427634	0.59514
cluster6	AT3G07870	Carubv10013813	CARHR082600	Thhalv10020831	0.237547	0.788397	0.689214	0.81658	0.929944	0.873749	1.02873	0.475133	0.813419
cluster6	AT3G08030	Carubv10014019	CARHR082770	Thhalv10020990	0.648471	0.951151	0.890153	1.35259	0.954564	1.19384	0.923106	1.34954	0.00319818
cluster6	AT3G08950	Carubv10014336	CARHR083290	Thhalv10021214	0.451262	0.813207	0.698098	0.172638	0.774102	0.920604	-0.0249142	0.863239	1.27152
cluster6	AT3G09220	Carubv10016347	CARHR083560	Thhalv10020392	0.56811	0.454355	0.2857	0.426049	0.565825	0.599089	2.54171	0.0177054	0.959145
cluster6	AT3G09370	Carubv10013377	CARHR083740	Thhalv10020579	0.592557	1.01546	0.933973	0.236724	1.24299	0.956873	1.81425	0.693209	0.188977
cluster6	AT3G09920	Carubv10015222	CARHR084430	Thhalv10020082	1.03381	1.44309	1.10311	0.28329	0.97968	0.959575	0.631349	0.544512	0.891463
cluster6	AT3G10500	Carubv10013370	CARHR085010	Thhalv10020438	1.14151	1.59102	1.21761	0.99601	1.34504	1.45512	1.04244	0.832319	-0.199925
cluster6	AT3G10800	Carubv10016005	CARHR085360	Thhalv10020207	0.973188	1.40355	1.00799	0.719499	1.30635	1.14274	1.52568	0.85073	1.5033
cluster6	AT3G10960	Carubv10016014	CARHR085540	Thhalv10020384	0.977967	0.854585	0.524524	0.637532	0.883057	0.808898	0.825518	1.47098	1.55842
cluster6	AT3G10986	Carubv10014688	CARHR085580	Thhalv10022413	2.74772	1.92875	-0.594844	0.861403	0.411137	1.20377	2.0622	0.495098	1.3418
cluster6	AT3G11850	Carubv10013486	CARHR086410	Thhalv10020560	1.23215	1.94471	0.972003	0.560753	1.316	1.02152	1.49759	1.48349	0.794656
cluster6	AT3G12360	Carubv10013299	CARHR086890	Thhalv10020362	0.845935	1.53317	0.913274	1.00978	1.3318	1.30242	0.611928	0.71965	0.866622
cluster6	AT3G12400	Carubv10015463	CARHR086930	Thhalv10022018	0.805296	0.748788	0.795145	1.02608	0.91804	1.13075	1.28723	0.627739	0.820971
cluster6	AT3G12510	Carubv10014769	CARHR050180	Thhalv10022424	0.661742	0.323787	0.923867	0.880931	1.30723	1.31152	1.83041	-0.929362	0.79966
cluster6	AT3G12570	Carubv10013545	CARHR087070	Thhalv10020602	0.746284	1.15799	1.2227	0.561523	1.00198	0.90586	1.65937	1.18857	1.01375
cluster6	AT3G12630	Carubv10014801	CARHR087140	Thhalv10021683	0.4682	0.449633	0.855584	1.02524	1.03249	1.36396	1.21954	0.745665	0.581793
cluster6	AT3G12830	Carubv10014909	CARHR087360	Thhalv10022038	0.155637	0.545541	0.540561	0.847486	0.935366	0.73319	1.844	0.54528	0.384726
cluster6	AT3G13320	Carubv10013719	CARHR087930	Thhalv10020742	0.440612	0.877212	0.428533	0.406469	0.56084	0.578523	1.89403	0.983569	0.588857
cluster6	AT3G13330	Carubv10012798	CARHR087940	Thhalv10019881	1.34246	0.951757	0.365394	0.0767112	0.211953	0.414392	0.528745	0.775745	0.590288
cluster6	AT3G13380	Carubv10012843	CARHR087990	Thhalv10019932	1.62923	1.44272	0.51944	0.264785	0.967881	1.01328	2.01254	0.379637	0.760945
cluster6	AT3G13600	Carubv10013255	CARHR088300	Thhalv10022216	0.901379	1.01504	0.584884	0.730311	1.22336	0.379759	1.3005	0.0270217	0.572305
cluster6	AT3G14075	Carubv10015555	CARHR088930	Thhalv10020264	0.546787	0.735597	0.674217	0.248765	0.889534	0.803153	1.0725	0.84103	0.421529
cluster6	AT3G14990	Carubv10013988	CARHR089950	Thhalv10020891	1.22369	0.882913	1.07706	0.312556	1.20368	1.24672	1.80206	0.804469	1.93668
cluster6	AT3G15200	Carubv10016260	CARHR090190	Thhalv10022416	1.00505	1.58096	1.69187	0.604156	2.10982	0.776327	1.40495	1.0432	1.27036
cluster6	AT3G15260	Carubv10014320	CARHR090240	Thhalv10022058	0.684335	0.491652	0.989591	0.492355	0.871077	0.906829	0.764088	0.335389	1.38136
cluster6	AT3G15351	Carubv10014784	CARHR090340	Thhalv10021656	0.0406623	0.642394	0.740542	0.709084	1.45833	1.11131	1.29111	0.838134	0.940805
cluster6	AT3G15990	Carubv10013170	CARHR091120	Thhalv10020608	1.16772	1.13818	0.897464	0.481905	1.77119	0.793112	1.73799	0.124115	0.955523
cluster6	AT3G16150	Carubv10014177	CARHR091310	Thhalv10021131	1.14365	-0.105312	-0.102779	0.595466	0.480537	0.616461	1.76068	1.09809	1.05863
cluster6	AT3G16220	Carubv10014438	CARHR091410	Thhalv10021339	0.690845	1.03404	0.436668	0.989635	1.64401	0.698487	2.00294	0.362354	0.0152284
cluster6	AT3G16270	Carubv10015684	CARHR091480	Thhalv10020187	0.829574	1.11779	0.709467	0.427336	0.934173	0.797368	0.96426	0.635705	0.624023
cluster6	AT3G16330	Carubv10014623	CARHR091540	Thhalv10021537	0.955364	0.427342	1.57793	0.701121	0.894402	1.74336	0.993939	1.89108	-0.0769109
cluster6	AT3G16565	Carubv10014731	CARHR091770	Thhalv10021369	1.31638	-0.220884	0.602902	0.652151	1.1587	1.831	2.29998	1.28802	1.3984
cluster6	AT3G18290	Carubv10012831	CARHR093650	Thhalv10019915	1.08776	1.21041	0.443984	0.292194	0.900866	0.980627	0.89353	0.513982	0.636104
cluster6	AT3G18300	Carubv10016360	CARHR093670	Thhalv10021275	0.0146903	1.0769	0.475693	-0.0154028	0.864202	1.29141	1.27983	0.751476	1.05157
cluster6	AT3G19130	Carubv10013726	CARHR094540	Thhalv10020763	0.884005	0.866364	1.05043	0.835579	1.27024	1.39445	0.864327	0.677015	0.434361
cluster6	AT3G19390	Carubv10013678	CARHR094790	Thhalv10020714	1.00107	1.04257	0.32119	0.317949	1.01835	0.517917	1.92189	0.38469	0.0232567
cluster6	AT3G20310	Carubv10014475	CARHR095960	Thhalv10021393	0.589183	0.297465	0.762835	1.04119	0.789265	1.14113	0.733789	0.851772	0.405262
cluster6	AT3G20340	Carubv10014962	CARHR095990	Thhalv10021814	1.091	0.731422	1.14953	1.77399	0.902864	1.12863	1.97914	0.890445	0.541072
cluster6	AT3G20660	Carubv10013447	CARHR096470	Thhalv10022015	1.00089	0.792785	0.528231	0.470935	0.779222	0.568274	1.42615	0.575573	1.30134
cluster6	AT3G21352	Carubv10016390	CARHR097300	Thhalv10021873	0.587939	-0.074286	0.0939676	1.11238	0.648614	1.06047	1.43113	0.535974	1.36453
cluster6	AT3G21710	Carubv10014480	CARHR097660	Thhalv10021505	0.809787	0.512603	0.698931	0.626924	1.20127	0.935064	0.389855	0.527942	1.04653
cluster6	AT3G22240	Carubv10015189	CARHR098150	Thhalv10021881	0.819299	0.552129	0.542267	0.534282	0.790343	1.07935	1.90106	2.36362	1.23717
cluster6	AT3G22942	Carubv10014985	CARHR098880	Thhalv10021823	0.852186	0.85896	1.33191	0.757712	1.15006	1.52414	1.72394	0.0244555	1.76486
cluster6	AT3G22950	Carubv10014743	CARHR098890	Thhalv10026343	0.799117	0.529466	1.24635	0.800406	1.13545	1.14978	1.84766	0.71479	0.507139
cluster6	AT3G23170	Carubv10015819	CARHR099110	Thhalv10021654	1.41185	0.68552	0.628516	1.56806	1.2419	1.15372	0.968342	1.07706	0.55505
cluster6	AT3G23280	Carubv10015729	CARHR099240	Thhalv10020731	0.803716	0.752188	0.485255	0.202221	0.751905	0.454	0.596961	1.01948	0.000267
cluster6	AT3G24090	Carubv10015832	CARHR100130	Thhalv10002424	1.18954	1.45072	1.23275	0.887282	1.36885	0.78534	0.986199	0.986289	1.8926
cluster6	AT3G24180	Carubv10012912	CARHR100020	Thhalv10020003	1.21024	0.819259	0.563479	-0.154552	0.525644	0.337139	1.08099	0.719735	0.837026
cluster6	AT3G24530	Carubv10013586	CARHR100670	Thhalv10002506	0.308318	1.09167	0.615141	0.532287	1.01851	0.807646	0.771273	0.23375	0.715999
cluster6	AT3G24550	Carubv10013175	CARHR100720	Thhalv10002434	0.775336	1.22556	0.871098	0.973521	1.45335	1.33183	0.624093	0.66943	0.719798
cluster6	AT3G24840	Carubv10015522	CARHR101200	Thhalv10002458	0.763152	1.01585	0.369445	0.377281	0.803338	0.513922	1.81009	1.11715	0.344236
cluster6	AT3G26000	Carubv10017220	CARHR146990	Thhalv10004262	0.457442	0.747277	0.581632	0.539956	1.18666	0.677575	0.968792	0.631777	0.745022
cluster6	AT3G26090	Carubv10017203	CARHR147090	Thhalv10004169	0.862303	1.3447	1.07486	0.797972	1.65633	1.01114	1.45805	0.112113	1.37742
cluster6	AT3G27010	Carubv10017630	CARHR148200	Thhalv10004391	1.16019	1.02813	1.2295	1.75756	1.19809	1.68737	0.659343	1.2079	0.821125
cluster6	AT3G27560	Carubv10017518	CARHR148940	Thhalv10004482	0.523379	0.435903	0.394482	0.329776	0.506869	0.575386	0.92898	1.32844	1.0479
cluster6	AT3G29170	Carubv10018086	CARHR152330	Thhalv10005146	0.487534	0.727541	1.17175	1.28172	1.35283	1.58109	1.30035	1.27808	0.437905
cluster6	AT3G29360	Carubv10017126	CARHR154070	Thhalv10004110	0.958418	0.946318	1.00314	1.0306	1.01737	0.995013	0.59562	1.13816	0.376298
cluster6	AT3G29575	Carubv10017919	CARHR153100	Thhalv10004771	0.336661	0.78691	0.622846	0.792326	2.06719	1.35255	1.74385	-0.255869	1.0741
cluster6	AT3G30775	Carubv10017074	CARHR153560	Thhalv10004065	0.543598	0.571257	0.803867	0.48463	0.637715	0.487291	2.10513	1.0737	0.78171
cluster6	AT3G44550	Carubv10008006	CARHR151610	Thhalv10002495	0.634691	1.16354	0.308416	-0.099337	1.40415	0.575122	1.28623	0.904008	0.455607
cluster6	AT3G45090	Carubv10016758	CARHR150850	Thhalv10002416	-0.0200687	1.50002	0.805471	0.0475432	1.31933	1.22719	0.513352	1.56618	0.436628
cluster6	AT3G45730	Carubv10018964	CARHR149930	Thhalv10002754	0.348388	0.703681	0.653657	1.99966	0.14023	1.57011	1.40162	0.321473	0.542131
cluster6	AT3G46330	Carubv10018943	CARHR154780	Thhalv10002794	1.64924	0.648887	1.16619	-0.225772	1.51095	1.5615	0.934799	1.14189	0.338165
cluster6	AT3G46510	Carubv10016804	CARHR155290	Thhalv10002430	0.649097	0.578501	0.361752	0.224106	0.541057	0.342468	1.01248	0.453883	0.541568
cluster6	AT3G46540	Carubv10017680	CARHR155260	Thhalv10002619	0.395209	0.637823	0.22045	0.0265494	0.892004	1.10594	1.02075	0.236861	0.633727
cluster6	AT3G46600	Carubv10016909	CARHR155210	Thhalv10002455	0.378383	1.34692	0.210454	0.442724	0.603921	0.47702	1.64762	1.00273	0.801074
cluster6	AT3G47050	Carubv10016857	CARHR155670	Thhalv10010213	1.54065	0.824435	0.596677	0.494202	0.62362	0.23237	2.7161	0.712551	0.621612
cluster6	AT3G47180	Carubv10018510	CARHR155860	Thhalv10010717	0.860444	0.39361	0.638473	0.448643	0.445354	0.107402	1.13826	0.300592	0.598152
cluster6	AT3G47730	Carubv10016638	CARHR156410	Thhalv10010099	0.893514	1.02991	0.287859	0.159927	0.621699	0.235867	1.99656	1.97783	0.70497
cluster6	AT3G47780	Carubv10016655	CARHR156460	Thhalv10010102	1.58325	1.2822	0.985114	0.27667	0.74751	0.86218	1.38055	2.31713	0.958418
cluster6	AT3G48050	Carubv10016566	CARHR276680	Thhalv10010055	0.73614	1.24129	0.415885	0.338608	0.340505	0.533397	0.621397	0.378444	0.592588
cluster6	AT3G49060	Carubv10019465	CARHR157890	Thhalv10010130	0.332374	1.12434	0.408068	-0.242258	0.51436	0.730166	1.17611	0.67904	0.308757
cluster6	AT3G49390	Carubv10017475	CARHR158360	Thhalv10010470	0.334432	0.659677	0.790287	0.488765	0.998759	0.882163	1.03433	0.522312	-0.15795
cluster6	AT3G49550	Carubv10018212	CARHR158560	Thhalv10010801	0.591421	0.45502	0.857474	0.437052	0.912296	0.566834	1.42237	0.937442	-0.0363906
cluster6	AT3G50340	Carubv10017385	CARHR159800	Thhalv10010424	1.03683	1.3603	0.170413	1.80703	1.65594	1.17625	1.35715	0.144132	-0.106994
cluster6	AT3G50800	Carubv10018688	CARHR160340	Thhalv10010783	0.683149	0.361658	0.563449	0.369844	1.14219	0.631257	1.53456	2.14069	-0.0210497
cluster6	AT3G51350	Carubv10019091	CARHR160930	Thhalv10010279	0.838773	0.842651	0.803964	0.581875	1.26517	1.39146	2.64408	1.47749	1.07306
cluster6	AT3G51360	Carubv10018764	CARHR160950	Thhalv10010308	0.520235	1.72138	0.381047	0.791286	1.4599	0.969099	2.63408	1.77237	0.704704
cluster6	AT3G51440	Carubv10019569	CARHR161030	Thhalv10010472	1.08217	1.18339	1.02651	1.014	1.66914	1.62642	0.558326	1.21239	0.655106
cluster6	AT3G51790	Carubv10019299	CARHR161420	Thhalv10010653	0.683494	0.438139	0.869995	0.789364	0.962596	1.25196	2.7537	0.722844	0.838328
cluster6	AT3G52240	Carubv10018644	CARHR161990	Thhalv10010215	0.879847	1.29386	0.331871	0.409135	0.578446	0.387472	0.725594	0.922492	0.69994
cluster6	AT3G52480	Carubv10018019	CARHR162250	Thhalv10010711	0.278885	0.318255	0.521814	0.851525	0.590716	0.816116	1.6851	1.03639	0.823964
cluster6	AT3G52780	Carubv10018720	CARHR162660	Thhalv10010920	3.41114	-1.00648	-0.0708302	0.157832	0.912201	1.7792	0.280246	1.46875	-0.0038075
cluster6	AT3G53120	Carubv10018514	CARHR162970	Thhalv10010721	0.404906	0.443677	0.867653	0.523632	0.857009	0.65028	1.16087	1.10686	2.0219
cluster6	AT3G53490	Carubv10017981	CARHR163390	Thhalv10010698	0.745376	0.94309	1.04703	1.10326	1.36395	1.21758	0.762875	1.68612	1.02394
cluster6	AT3G53620	Carubv10018002	CARHR163550	Thhalv10010704	0.459545	0.355074	0.494732	0.498217	0.673445	0.85167	1.04695	0.830686	0.0386859
cluster6	AT3G53670	Carubv10018046	CARHR163580	Thhalv10010719	1.44418	-0.0578883	0.356857	-0.818464	0.876518	0.469096	0.909946	0.505403	0.666619
cluster6	AT3G53720	Carubv10016685	CARHR163620	Thhalv10010121	0.966535	1.33102	0.789344	0.428677	0.720969	1.08759	1.19349	0.170763	-0.176857
cluster6	AT3G53780	Carubv10017398	CARHR163680	Thhalv10010439	0.735818	0.510269	0.566431	1.18562	0.786134	0.625362	1.38483	1.97863	2.15826
cluster6	AT3G54020	Carubv10018990	CARHR163920	Thhalv10010600	0.415966	0.664194	0.772156	1.01642	1.15829	0.60438	0.823927	1.75852	2.16266
cluster6	AT3G54040	Carubv10018100	CARHR163940	Thhalv10010808	0.987335	0.545718	0.774898	0.661049	0.827285	1.04789	1.88623	1.46971	0.0760412
cluster6	AT3G54130	Carubv10018965	CARHR164010	Thhalv10010608	0.434318	0.392183	0.718105	0.698501	1.02279	1.03712	0.502318	0.693128	0.657423
cluster6	AT3G54200	Carubv10017950	CARHR164120	Thhalv10010532	1.12891	0.949631	1.0274	1.62562	1.51957	1.16796	1.36018	0.380474	2.10401
cluster6	AT3G54950	Carubv10017102	CARHR164930	Thhalv10010298	0.781976	0.537384	0.458847	0.744326	0.479833	0.62554	1.00951	1.82373	0.949113
cluster6	AT3G55270	Carubv10016710	CARHR165270	Thhalv10010135	1.05434	1.32295	0.634104	0.412299	1.27074	0.865176	0.971481	1.23196	2.37555
cluster6	AT3G55410	Carubv10016624	CARHR165430	Thhalv10010095	0.986294	1.18358	1.05858	0.613735	1.61689	1.35742	1.49002	0.543206	0.969373
cluster6	AT3G55720	Carubv10017270	CARHR165820	Thhalv10010310	0.587233	1.49991	0.870019	0.232957	0.884449	1.49198	0.445869	0.660071	1.02482
cluster6	AT3G55820	Carubv10018041	CARHR165930	Thhalv10010736	0.608726	0.498008	0.653764	0.66642	0.806094	0.658756	2.73012	0.0381842	0.519025
cluster6	AT3G55830	Carubv10017597	CARHR165940	Thhalv10010522	0.64629	0.565523	0.531487	0.810444	1.02702	0.758332	1.482	0.614406	0.280405
cluster6	AT3G55960	Carubv10017717	CARHR166040	Thhalv10006119	0.755947	0.994946	0.876697	0.843476	1.64178	1.09573	0.752039	0.631798	0.493121
cluster6	AT3G56050	Carubv10018806	CARHR166120	Thhalv10005911	1.04487	1.21149	0.853705	1.01059	1.07386	1.08695	0.578617	0.448472	0.50516
cluster6	AT3G56440	Carubv10018419	CARHR166570	Thhalv10006031	0.687535	1.27184	0.955873	0.426021	1.26724	0.373792	1.39609	0.635286	0.748385
cluster6	AT3G57340	Carubv10017488	CARHR167530	Thhalv10006378	0.632249	0.515331	0.669331	0.725126	0.891172	0.86992	1.17767	0.689828	0.591705
cluster6	AT3G57520	Carubv10016720	CARHR167740	Thhalv10005800	0.828378	1.36935	1.41587	0.333801	1.48343	1.32833	1.5099	0.284856	0.847094
cluster6	AT3G58600	Carubv10017727	CARHR168990	Thhalv10006125	0.681683	1.08305	1.20722	0.724949	1.21627	0.961283	1.27164	0.743928	1.09573
cluster6	AT3G59280	Carubv10018261	CARHR169660	Thhalv10006321	0.188913	0.230129	0.537106	0.476175	0.663137	0.890765	1.39297	0.318299	0.308137
cluster6	AT3G59290	Carubv10016612	CARHR169670	Thhalv10005771	1.10135	1.23075	0.599105	0.575353	0.767903	1.20916	2.96514	0.597425	0.309931
cluster6	AT3G59480	Carubv10018769	CARHR169860	Thhalv10006096	0.299838	0.889673	0.42289	1.05117	1.44536	0.516646	2.64453	0.805734	0.489131
cluster6	AT3G60110	Carubv10016801	CARHR170420	Thhalv10005835	0.877985	1.57441	1.19822	0.667334	1.16228	1.19189	2.36465	0.827593	1.02609
cluster6	AT3G60260	Carubv10017843	CARHR170580	Thhalv10006159	0.257113	0.791802	0.780158	0.792762	1.30435	1.13238	0.391143	0.985823	1.0855
cluster6	AT3G60800	Carubv10017708	CARHR171190	Thhalv10006120	0.405859	0.51083	0.669422	0.522805	0.846592	0.699256	1.65715	0.73796	0.597969
cluster6	AT3G61450	Carubv10017837	CARHR171790	Thhalv10006366	1.32698	1.01868	0.848131	0.613786	0.957578	0.458627	1.87829	-0.124318	-0.497121
cluster6	AT3G61850	Carubv10017642	CARHR172180	Thhalv10006092	0.485395	0.721306	0.219365	0.326026	0.687031	0.380742	2.05742	0.829658	0.60088
cluster6	AT3G61980	Carubv10019191	CARHR172340	Thhalv10006320	0.279612	0.333942	0.89076	0.932967	0.905768	1.19039	0.841677	1.12488	1.12101
cluster6	AT3G62100	Carubv10018117	CARHR172440	Thhalv10006424	0.362151	0.585311	0.364118	1.21114	0.650232	0.362171	1.72501	2.27774	0.484486
cluster6	AT3G62240	Carubv10016703	CARHR172570	Thhalv10005791	0.718888	1.21275	0.571342	0.491514	0.567424	0.961535	1.53072	0.893058	1.00842
cluster6	AT3G62260	Carubv10017472	CARHR172590	Thhalv10006037	1.17658	1.59652	0.760704	0.989519	2.00904	1.31611	1.77024	0.351673	1.5964
cluster6	AT3G62690	Carubv10018872	CARHR172960	Thhalv10006175	0.653653	0.659722	0.471315	0.791978	0.49294	1.13363	0.844405	-0.0978641	0.715778
cluster6	AT3G62720	Carubv10017185	CARHR172990	Thhalv10005949	0.341544	0.761286	0.679321	0.471829	1.08551	0.610831	0.997216	1.25105	0.476716
cluster6	AT3G62770	Carubv10017285	CARHR173040	Thhalv10005977	0.541489	0.604106	0.562644	0.607455	0.519064	0.631652	1.23032	1.17032	0.82082
cluster6	AT3G62780	Carubv10018894	CARHR173050	Thhalv10006364	1.47104	0.723064	0.586991	1.46094	0.720775	1.46476	0.0728631	2.91028	0.537737
cluster6	AT3G62830	Carubv10017258	CARHR173100	Thhalv10005973	0.455854	0.494642	0.378904	0.0942958	0.369313	0.525215	1.93119	1.23463	0.612856
cluster6	AT3G63310	Carubv10018936	CARHR291650	Thhalv10006212	0.475034	0.33792	0.756036	0.563508	0.667885	0.781275	1.04327	1.59888	0.177251
cluster6	AT3G63420	Carubv10018305	CARHR291560	Thhalv10006334	0.706766	0.826277	1.30719	1.30852	1.6076	1.65423	0.805199	0.451902	0.575745
cluster6	AT3G63440	Carubv10018610	CARHR291530	Thhalv10005878	0.475987	0.789311	0.180437	0.825076	0.089289	0.42235	2.1664	0.681301	1.64861
cluster6	AT3G66654	Carubv10014582	CARHR081200	Thhalv10021435	0.739488	1.37589	1.28933	0.997684	1.71119	1.51331	0.927206	0.402329	2.51794
cluster6	AT4G00570	Carubv10000506	CARHR248740	Thhalv10028520	1.11392	1.22271	0.8097	0.648664	0.829802	0.921236	0.979542	0.260671	0.453433
cluster6	AT4G00720	Carubv10002475	CARHR248890	Thhalv10028631	0.24729	0.92268	0.466634	0.558453	0.778209	0.655682	1.6279	0.600201	0.77821
cluster6	AT4G00900	Carubv10000105	CARHR249430	Thhalv10028380	1.02692	1.14511	0.333824	0.0678786	0.302811	0.285974	1.73187	0.88454	0.591809
cluster6	AT4G00905	Carubv10001733	CARHR249420	Thhalv10028905	0.384392	1.01639	0.359341	0.447009	1.45924	0.297155	1.09057	0.167384	0.216258
cluster6	AT4G00940	Carubv10001609	CARHR249400	Thhalv10029492	0.80239	0.314225	0.474935	0.13721	0.41731	0.393702	1.00217	0.804043	0.620229
cluster6	AT4G01575	Carubv10003789	CARHR250100	Thhalv10029452	-0.515183	0.614133	0.727108	0.631185	0.742004	1.12902	1.4787	0.323331	0.00891324
cluster6	AT4G01630	Carubv10002806	CARHR250030	Thhalv10028899	1.71289	0.687011	1.54906	0.0178899	0.816724	0.787845	1.96166	0.695255	0.212297
cluster6	AT4G01895	Carubv10003854	CARHR249880	Thhalv10029175	0.880652	0.58739	0.884297	0.524801	1.91627	0.84193	1.14331	0.955326	0.270662
cluster6	AT4G02350	Carubv10000163	CARHR250540	Thhalv10028425	1.07031	1.5792	0.508065	0.428146	1.06744	0.902666	0.772748	0.888781	0.845344
cluster6	AT4G02550	Carubv10001530	CARHR250840	Thhalv10028829	0.632917	0.832667	1.0024	0.811866	1.34079	1.50964	1.01337	0.784803	0.24304
cluster6	AT4G02740	Carubv10001056	CARHR251080	Thhalv10029278	0.380107	0.616144	0.350453	0.284285	0.67943	0.333455	1.64605	0.551068	0.655683
cluster6	AT4G02940	Carubv10000595	CARHR251310	Thhalv10028541	1.22992	0.0374963	0.486415	0.502854	0.540865	0.844393	1.337	1.2308	0.53128
cluster6	AT4G03110	Carubv10000954	CARHR251540	Thhalv10028663	0.574929	1.30173	0.903557	0.936277	1.50023	1.00741	0.869081	0.198557	0.741724
cluster6	AT4G03260	Carubv10000980	CARHR251710	Thhalv10028489	0.908058	1.16159	0.55942	-0.0537809	1.46375	0.98561	1.10596	0.040871	0.536589
cluster6	AT4G03320	Carubv10001647	CARHR251750	Thhalv10028869	0.921027	0.452964	0.350177	0.767251	0.359585	0.850994	0.149651	1.18376	0.645764
cluster6	AT4G03610	Carubv10001384	CARHR252020	Thhalv10028809	-0.20568	0.860577	0.696399	-0.262019	1.2388	0.599143	0.646186	1.22153	0.717586
cluster6	AT4G04695	Carubv10000863	CARHR252860	Thhalv10028618	1.59198	1.76586	1.46266	0.799308	1.38103	1.22659	1.50667	1.79252	0.556654
cluster6	AT4G08040	Carubv10000914	CARHR259250	Thhalv10029359	2.08494	1.306	1.01244	1.6024	-0.329072	0.666947	2.04589	0.405745	1.02219
cluster6	AT4G08180	Carubv10000237	CARHR259310	Thhalv10028436	0.92241	0.801713	0.756525	0.306983	1.15024	0.824049	2.30446	1.08462	1.00153
cluster6	AT4G08230	Carubv10002285	CARHR259330	Thhalv10029535	0.42777	0.315423	0.791204	0.767966	1.25819	1.29811	0.813131	0.725826	0.22218
cluster6	AT4G08330	Carubv10002147	CARHR259420	Thhalv10029030	0.325129	0.371224	0.590975	1.07776	0.540296	0.924115	1.324	1.19253	0.251824
cluster6	AT4G10040	Carubv10002289	CARHR261040	Thhalv10029081	0.365765	0.698822	0.734769	0.813886	0.688294	1.44397	1.22847	1.5206	0.914324
cluster6	AT4G10390	Carubv10001348	CARHR256240	Thhalv10028779	0.888448	0.702182	1.40495	0.406185	1.00916	1.64815	0.946342	0.529955	2.1952
cluster6	AT4G10520	Carubv10000289	CARHR256070	Thhalv10028454	-0.0509235	-0.0578883	2.01757	0.312789	-0.259765	1.44621	1.67182	1.7296	0.416581
cluster6	AT4G12090	Carubv10002930	CARHR254130	Thhalv10029061	0.659993	0.240613	0.763651	0.954458	0.490812	0.988776	2.12196	1.39747	0.342174
cluster6	AT4G12250	Carubv10003353	CARHR254010	Thhalv10028672	0.62809	0.450671	0.541533	0.843999	1.00011	0.637938	2.03395	0.966223	0.591048
cluster6	AT4G14230	Carubv10004717	CARHR220350	Thhalv10025066	0.419041	0.410826	0.507822	-0.0827694	0.726135	0.295327	1.20901	1.01784	0.787382
cluster6	AT4G14350	Carubv10006540	CARHR220560	Thhalv10024825	0.527126	0.854343	0.426734	0.124511	0.597526	0.243988	1.26642	0.66385	0.428248
cluster6	AT4G14420	Carubv10005926	CARHR220630	Thhalv10026456	0.289425	0.466649	0.905023	0.839873	0.504215	0.930083	1.44569	0.299489	0.0601274
cluster6	AT4G14746	Carubv10005711	CARHR221230	Thhalv10026216	1.19554	0.515324	0.530934	1.16989	0.959925	0.79991	1.82442	1.36701	0.837611
cluster6	AT4G15420	Carubv10004257	CARHR222170	Thhalv10024806	0.714328	0.829152	0.692214	0.244394	0.565746	0.656064	0.488187	1.13129	0.181928
cluster6	AT4G15470	Carubv10005406	CARHR222220	Thhalv10026042	0.691498	0.863823	0.724423	0.87399	0.865622	0.864698	1.25919	0.87386	1.04222
cluster6	AT4G15530	Carubv10004079	CARHR222330	Thhalv10024330	2.17338	1.2419	0.927032	0.362168	0.581739	1.14366	1.55247	0.52483	0.694388
cluster6	AT4G17240	Carubv10005179	CARHR223850	Thhalv10025641	0.693798	0.635203	0.809407	0.104407	0.856573	0.722673	2.20016	0.251685	-0.41817
cluster6	AT4G17260	Carubv10005141	CARHR223890	Thhalv10025596	0.728882	1.02364	0.397556	0.475737	-0.0186386	0.733581	0.953721	0.700633	1.15987
cluster6	AT4G17486	Carubv10005683	CARHR224140	Thhalv10026178	0.606104	1.42208	0.706538	1.05475	1.6292	0.877567	1.58884	0.585464	1.0471
cluster6	AT4G17650	Carubv10005567	CARHR224370	Thhalv10026045	1.22725	0.307789	0.870912	0.891248	1.07138	1.58022	0.896569	-0.0520603	0.875237
cluster6	AT4G17720	Carubv10005272	CARHR224440	Thhalv10025761	0.951658	1.39426	1.3374	0.664662	1.67635	1.38581	0.650228	0.769417	1.46471
cluster6	AT4G18010	Carubv10007811	CARHR224780	Thhalv10024638	1.2446	0.745252	0.76571	0.690056	0.920622	1.68344	1.1359	1.16206	0.0457048
cluster6	AT4G18550	Carubv10004827	CARHR225400	Thhalv10025238	-0.176519	0.695644	0.84847	0.908658	1.01347	0.284012	1.75939	2.61505	0.566651
cluster6	AT4G19230	Carubv10004758	CARHR226140	Thhalv10025059	0.718968	0.660159	0.78092	0.359148	1.72847	0.529487	1.28428	-0.7746	0.689032
cluster6	AT4G19660	Carubv10006486	CARHR226480	Thhalv10024752	0.673785	1.37506	1.06474	0.56263	0.963266	0.542067	0.739924	1.4107	1.34181
cluster6	AT4G20170	Carubv10004512	CARHR227000	Thhalv10024965	0.369441	1.2511	1.16536	0.658195	1.38865	1.17991	0.440146	0.483788	1.48711
cluster6	AT4G20380	Carubv10005824	CARHR227210	Thhalv10001047	0.108384	0.73748	0.834462	0.891027	1.30551	0.972479	0.933166	0.707962	0.285876
cluster6	AT4G20460	Carubv10004939	CARHR227280	Thhalv10025334	1.62375	0.918482	0.997158	0.761787	1.59549	0.604928	0.330375	0.926583	2.10884
cluster6	AT4G21540	Carubv10005022	CARHR228210	Thhalv10025052	0.7218	1.06719	0.908602	0.390282	1.18025	0.863141	2.33621	0.34045	0.103685
cluster6	AT4G21990	Carubv10006797	CARHR228800	Thhalv10025134	1.09325	1.03875	0.752089	0.427692	0.756672	1.51199	0.789166	1.39052	1.27198
cluster6	AT4G22070	Carubv10004543	CARHR228870	Thhalv10026864	1.15032	1.40786	0.789604	0.798336	0.910695	0.808467	1.71722	1.26734	0.97882
cluster6	AT4G22820	Carubv10005807	CARHR229850	Thhalv10027105	0.901914	0.834848	1.18912	1.42449	1.8871	1.46643	1.42724	0.707601	1.44044
cluster6	AT4G22920	Carubv10005494	CARHR229960	Thhalv10025991	0.454867	1.0155	1.23612	0.530415	1.50399	1.24775	1.46119	1.48354	-0.404691
cluster6	AT4G23450	Carubv10006703	CARHR230780	Thhalv10026387	0.88397	0.96906	0.523755	0.481849	0.697581	0.056223	0.651185	1.38149	0.896975
cluster6	AT4G24230	Carubv10006316	CARHR231650	Thhalv10025430	0.821074	1.64669	0.961251	1.00864	1.768	1.29502	1.11699	0.77858	0.640561
cluster6	AT4G24340	Carubv10007687	CARHR231770	Thhalv10025575	1.38774	0.887893	1.14694	0.301274	1.54698	0.79058	1.67014	0.240156	1.44125
cluster6	AT4G24370	Carubv10007524	CARHR231780	Thhalv10026382	0.631859	0.294359	0.770847	0.95045	0.912848	1.43492	0.642888	0.00147636	1.21877
cluster6	AT4G24560	Carubv10004163	CARHR231960	Thhalv10024307	0.853379	0.834068	0.214392	0.00411963	0.792349	0.238109	1.47095	0.741602	0.606448
cluster6	AT4G24990	Carubv10006048	CARHR232380	Thhalv10026428	0.32162	0.36672	0.565996	0.788848	0.713108	0.902555	1.01326	0.616342	1.14933
cluster6	AT4G25230	Carubv10004457	CARHR232640	Thhalv10024774	0.942086	1.2635	0.883679	0.454199	1.52668	1.29148	1.8193	0.969638	0.213897
cluster6	AT4G26010	Carubv10006454	CARHR233520	Thhalv10025781	0.790652	0.467619	0.327744	0.57333	0.493256	0.544569	2.53522	2.29817	-0.703113
cluster6	AT4G26400	Carubv10005120	CARHR233950	Thhalv10025560	0.46979	1.33128	1.17794	1.072	1.48874	1.10205	1.10552	0.185875	0.30673
cluster6	AT4G26470	Carubv10007314	CARHR234050	Thhalv10026168	0.657334	0.458792	0.937282	0.573462	1.31644	0.866857	1.8464	1.87356	1.91792
cluster6	AT4G26750	Carubv10004769	CARHR234370	Thhalv10025139	0.85949	1.16611	0.647428	0.637535	0.98936	1.17916	0.834	0.568117	0.0134187
cluster6	AT4G26950	Carubv10005751	CARHR234550	Thhalv10027587	1.41839	0.578396	2.37866	0.317277	1.72773	0.785791	1.84784	1.77746	0.911418
cluster6	AT4G27290	Carubv10007718	CARHR234950	Thhalv10027068	1.34567	0.702706	-0.49436	-0.393624	0.589307	0.772037	0.935176	0.751448	0.0622987
cluster6	AT4G27470	Carubv10005617	CARHR235150	Thhalv10026108	0.506434	0.501543	0.396411	0.490353	0.787081	0.979399	1.56305	2.54609	1.50179
cluster6	AT4G27500	Carubv10004404	CARHR235180	Thhalv10027051	1.1839	1.31882	0.753585	0.631742	1.12517	1.38004	0.984896	0.712089	0.473885
cluster6	AT4G28490	Carubv10004062	CARHR236270	Thhalv10024311	1.87354	1.01792	1.21719	1.03442	0.655781	1.35562	1.62172	0.350815	1.89354
cluster6	AT4G28710	Carubv10006964	CARHR236500	Thhalv10024210	1.98579	1.53417	0.760654	0.24058	0.761082	1.04662	1.45424	1.84983	0.913385
cluster6	AT4G29110	Carubv10005770	CARHR236840	Thhalv10026234	0.600176	0.564461	1.16688	1.0724	1.54384	1.71229	0.866351	3.18996	0.504138
cluster6	AT4G29440	Carubv10004047	CARHR237260	Thhalv10027451	0.809956	1.29993	0.546538	0.53691	0.712675	1.14979	1.36644	1.04721	0.373741
cluster6	AT4G29810	Carubv10023497	CARHR237710	Thhalv10025531	1.31921	0.306323	0.925822	0.557591	1.01204	0.80563	0.440624	0.765242	1.89705
cluster6	AT4G29900	Carubv10006503	CARHR237800	Thhalv10024281	1.36893	1.83042	1.17446	0.656365	1.23311	1.14967	2.03626	0.814092	0.929516
cluster6	AT4G29950	Carubv10004141	CARHR237870	Thhalv10024395	1.28332	1.53708	1.00705	0.294692	1.36735	-0.0511043	1.44729	1.44395	0.64101
cluster6	AT4G30510	Carubv10005100	CARHR238400	Thhalv10025790	0.246111	0.174641	0.402907	0.457547	0.627422	0.749848	2.1427	0.109353	1.03599
cluster6	AT4G30640	Carubv10007535	CARHR238520	Thhalv10014209	0.588953	0.951007	0.883883	0.947614	0.937343	0.952737	0.780452	1.92871	-0.352473
cluster6	AT4G30780	Carubv10004435	CARHR238620	Thhalv10024775	0.618594	0.594286	0.752962	0.285544	1.23622	0.784402	1.37164	1.14793	0.781078
cluster6	AT4G31000	Carubv10004503	CARHR238930	Thhalv10024817	0.502329	1.50934	0.589107	0.151396	0.912316	0.837574	0.356013	1.24209	0.966338
cluster6	AT4G31750	Carubv10005299	CARHR239650	Thhalv10025784	0.163929	0.515587	0.353508	0.649376	1.27184	0.950874	1.18393	0.523689	0.862736
cluster6	AT4G31860	Carubv10005121	CARHR239770	Thhalv10025532	0.942276	0.0996242	0.575632	0.348737	0.985691	1.12856	1.14858	0.729998	0.470218
cluster6	AT4G31875	Carubv10006687	CARHR239800	Thhalv10026431	0.50099	0.243088	0.86676	1.11156	1.22043	0.570859	0.500379	2.19194	0.53285
cluster6	AT4G32030	Carubv10005509	CARHR116290	Thhalv10025671	0.493783	0.836056	1.05826	1.28709	1.48438	1.70461	1.60474	0.280718	0.904296
cluster6	AT4G32140	Carubv10004992	CARHR240070	Thhalv10025399	0.759872	1.36761	1.1301	1.02049	1.39788	1.48636	0.76773	0.317704	0.552885
cluster6	AT4G32160	Carubv10004240	CARHR240090	Thhalv10024530	0.571975	1.18068	0.468952	-0.035237	0.785255	0.241799	0.59738	0.375589	0.839896
cluster6	AT4G32285	Carubv10004350	CARHR240180	Thhalv10024663	0.723343	0.821137	0.489335	0.74303	0.741945	0.580106	1.48283	0.800191	0.666411
cluster6	AT4G32440	Carubv10006237	CARHR240360	Thhalv10025566	0.632552	0.977164	0.832857	0.272691	0.888425	0.701626	2.1275	0.440162	0.971096
cluster6	AT4G32480	Carubv10005303	CARHR240400	Thhalv10025865	0.215073	0.888039	0.853712	0.483345	1.53673	0.656763	0.867942	1.02802	1.82537
cluster6	AT4G33060	Carubv10004633	CARHR241070	Thhalv10025014	0.691681	1.6281	1.07517	1.23616	1.6815	1.20465	0.594126	0.506872	1.55073
cluster6	AT4G33420	Carubv10005237	CARHR241470	Thhalv10025702	1.12312	0.872941	1.11042	0.91678	1.41248	0.930658	0.926379	2.31751	0.49506
cluster6	AT4G33940	Carubv10007238	CARHR242040	Thhalv10026077	0.596	-0.0262071	1.3379	0.956258	1.35788	-0.0794892	1.12518	1.11931	1.38441
cluster6	AT4G33980	Carubv10005640	CARHR242110	Thhalv10026267	1.07687	1.31686	1.3189	0.799164	1.25604	0.9442	0.922454	1.58995	-1.03461
cluster6	AT4G34100	Carubv10004028	CARHR242210	Thhalv10024280	0.936256	1.24186	0.572658	0.457056	0.811389	0.72902	0.632451	0.605543	0.51065
cluster6	AT4G34120	Carubv10005622	CARHR242240	Thhalv10026144	0.930022	0.8938	0.735991	0.728256	0.932257	1.0243	1.42005	1.42565	0.868385
cluster6	AT4G34660	Carubv10005057	CARHR242970	Thhalv10025594	0.595383	0.644299	0.393896	0.186544	0.608365	0.48824	1.31273	0.243992	0.29443
cluster6	AT4G34810	Carubv10007206	CARHR243110	Thhalv10026649	0.69772	1.00395	1.00027	1.38572	0.884369	2.16182	1.60622	0.800323	0.444392
cluster6	AT4G35080	Carubv10005106	CARHR243360	Thhalv10025471	0.250924	0.644357	0.773887	0.692672	1.65394	1.00084	0.665488	0.520068	0.631327
cluster6	AT4G35310	Carubv10004491	CARHR243640	Thhalv10024803	0.958932	1.25773	1.15503	1.00744	1.14371	1.2641	2.15242	1.47242	0.803905
cluster6	AT4G35350	Carubv10005136	CARHR243670	Thhalv10025568	0.993586	0.709953	0.547277	0.416523	0.909778	0.664207	1.70149	0.478984	0.366455
cluster6	AT4G35500	Carubv10004836	CARHR243830	Thhalv10025221	1.1797	1.55982	0.993918	0.890336	1.50588	1.0554	1.08323	0.727681	0.680371
cluster6	AT4G35630	Carubv10006606	CARHR243980	Thhalv10025259	1.35372	-0.18155	0.619972	0.221895	1.03467	0.717377	0.702978	0.329658	1.25221
cluster6	AT4G35940	Carubv10005187	CARHR244340	Thhalv10027062	0.0840229	1.34637	0.99168	0.286843	0.834915	1.63939	1.6716	1.16988	0.382474
cluster6	AT4G35985	Carubv10004804	CARHR244370	Thhalv10027489	1.31729	0.737371	0.558108	0.841189	0.977295	0.412358	0.748409	0.0373505	1.90456
cluster6	AT4G36210	Carubv10004298	CARHR244610	Thhalv10024597	0.719489	0.911736	0.459311	0.130248	0.668087	0.350587	0.458181	0.333806	1.04344
cluster6	AT4G36410	Carubv10005917	CARHR244740	Thhalv10026441	0.344236	-0.00605889	0.646581	0.433865	1.29367	0.541462	1.28068	0.900923	1.46707
cluster6	AT4G36610	Carubv10005282	CARHR244950	Thhalv10025766	1.1366	0.670595	0.613089	0.445982	0.879649	1.03141	0.983922	1.84808	0.98578
cluster6	AT4G36945	Carubv10007202	CARHR245560	Thhalv10025378	0.944667	1.11937	1.22671	0.999827	1.87804	1.15294	1.19775	2.58815	0.265557
cluster6	AT4G37260	Carubv10007638	CARHR245660	Thhalv10025742	0.120802	0.784731	0.826215	0.5959	1.74042	1.31268	1.46723	0.379984	1.27493
cluster6	AT4G37610	Carubv10005081	CARHR246000	Thhalv10025450	0.476736	1.29448	0.910346	0.790292	1.97239	0.862854	1.89954	0.793559	1.42606
cluster6	AT4G37790	Carubv10005427	CARHR246180	Thhalv10025923	0.777378	0.769203	0.915523	0.837459	0.976807	1.03241	1.85209	1.54707	0.824138
cluster6	AT4G38830	Carubv10007091	CARHR247910	Thhalv10024611	1.64827	0.112335	0.937734	-0.118814	-0.648611	1.48382	1.46868	1.54662	1.42427
cluster6	AT5G01180	Carubv10000567	CARHR211500	Thhalv10013125	0.951924	1.24478	0.638478	0.715065	1.16179	0.143289	1.82562	-0.274412	0.00463262
cluster6	AT5G01210	Carubv10000861	CARHR211540	Thhalv10013380	1.17136	0.72644	0.496754	0.896332	0.65543	0.871877	1.0791	0.225171	0.284282
cluster6	AT5G01340	Carubv10001516	CARHR211700	Thhalv10014166	0.528093	0.849445	0.364868	0.41877	0.939848	1.32879	1.43396	0.354831	-0.0809315
cluster6	AT5G01980	Carubv10012728	CARHR212330	Thhalv10015834	0.58517	1.11427	0.977387	0.745577	1.72236	1.35582	1.57276	0.811027	2.11165
cluster6	AT5G02230	Carubv10001663	CARHR211140	Thhalv10014335	1.36385	1.26999	0.79312	0.492793	2.71504	0.565769	1.14619	1.09649	1.4399
cluster6	AT5G02800	Carubv10001173	CARHR210530	Thhalv10013827	0.797597	1.40949	0.94134	0.652124	1.76583	1.19921	0.98047	0.962133	0.673516
cluster6	AT5G03030	Carubv10002291	CARHR210290	Thhalv10015062	0.439074	0.17785	0.695328	0.915168	0.807734	1.14979	1.07145	0.52091	0.436935
cluster6	AT5G03260	Carubv10000520	CARHR210090	Thhalv10013135	1.41969	0.464737	0.0694652	0.420037	1.53432	0.684304	1.87641	0.958896	0.351312
cluster6	AT5G03730	Carubv10000240	CARHR209570	Thhalv10012708	1.23439	1.09018	0.768485	0.505342	1.15615	1.09245	0.829632	0.606764	0.404495
cluster6	AT5G03890	Carubv10002084	CARHR209370	Thhalv10014801	0.0649285	0.49614	0.955858	0.798058	0.799463	1.17184	2.36089	0.800044	0.430663
cluster6	AT5G03990	Carubv10001427	CARHR209290	Thhalv10014260	0.616601	0.566659	0.835735	0.612854	0.878034	1.0802	0.6704	1.12071	-0.0641423
cluster6	AT5G04250	Carubv10001336	CARHR209030	Thhalv10013878	1.0031	1.27954	0.94184	0.77716	1.48532	1.16874	1.17973	0.851086	2.24463
cluster6	AT5G04720	Carubv10000246	CARHR208570	Thhalv10012720	0.892646	0.974195	0.741935	0.579412	0.439045	1.00756	1.55336	1.73191	0.575533
cluster6	AT5G04860	Carubv10000272	CARHR208420	Thhalv10012753	1.06338	1.21088	0.598502	0.286227	0.858535	0.925199	1.54254	1.27156	1.2464
cluster6	AT5G05440	Carubv10002000	CARHR207820	Thhalv10014719	0.418345	0.104558	0.74487	1.02475	0.548084	1.2699	1.02425	0.611663	0.732379
cluster6	AT5G05490	Carubv10002912	CARHR207780	Thhalv10013002	0.262505	1.22624	0.718697	-0.297753	0.720638	1.52165	1.96394	1.66312	0.388443
cluster6	AT5G05790	Carubv10001695	CARHR207470	Thhalv10014370	0.841995	0.772504	0.60554	0.132951	0.529116	0.296423	1.10283	0.256578	-0.0925528
cluster6	AT5G06090	Carubv10000788	CARHR206790	Thhalv10015521	1.9546	0.890533	0.96611	-0.0730877	0.536506	0.636109	1.00173	1.1998	2.7456
cluster6	AT5G06230	Carubv10003438	CARHR206930	Thhalv10013662	0.671616	1.03887	1.07983	0.497977	1.53349	0.0585734	1.96358	0.703622	1.46341
cluster6	AT5G06570	Carubv10001401	CARHR206630	Thhalv10014072	0.783984	0.706173	0.662038	1.05769	0.8273	0.662822	2.52398	-0.933097	0.0136479
cluster6	AT5G06720	Carubv10001380	CARHR206480	Thhalv10014029	0.889417	0.791994	0.515705	0.680014	0.666126	0.744616	1.52856	1.3759	1.71487
cluster6	AT5G06839	Carubv10003744	CARHR206330	Thhalv10014032	0.169742	0.985019	1.1347	0.245549	0.769847	0.729039	1.00406	1.05226	0.595835
cluster6	AT5G07070	Carubv10002839	CARHR206080	Thhalv10013492	0.39067	1.06003	0.392079	0.455521	0.307635	0.800779	0.797827	0.446242	0.614015
cluster6	AT5G07080	Carubv10000939	CARHR206060	Thhalv10013522	0.847237	0.648574	0.414714	0.184704	0.438299	0.335711	1.33689	1.66033	0.664916
cluster6	AT5G07150	Carubv10000694	CARHR205990	Thhalv10013141	0.804592	1.25681	0.518704	0.641698	0.808619	0.383298	1.3056	1.14982	1.11796
cluster6	AT5G07475	Carubv10003579	CARHR205660	Thhalv10014745	0.957902	0.110934	0.599176	0.49746	0.76673	1.27061	0.620126	0.904265	0.531338
cluster6	AT5G07610	Carubv10003229	CARHR205550	Thhalv10015553	0.889537	0.582723	0.497494	1.23929	2.02234	0.658798	1.85672	2.37703	-0.699502
cluster6	AT5G07880	Carubv10002435	CARHR205320	Thhalv10014162	0.134723	1.60779	0.502721	1.09052	0.301041	0.878995	1.17767	0.120846	0.284072
cluster6	AT5G07910	Carubv10003412	CARHR205290	Thhalv10014418	0.351469	0.545064	0.723461	0.734886	0.981682	1.0204	1.38795	0.376578	1.61433
cluster6	AT5G08200	Carubv10001081	CARHR204980	Thhalv10013674	0.940288	1.0983	0.806326	0.708828	1.4432	0.948652	0.932381	-0.0173415	0.860711
cluster6	AT5G08300	Carubv10001317	CARHR204830	Thhalv10013993	0.650417	0.594644	0.585476	0.595878	0.765633	0.822638	1.06234	0.30605	0.240252
cluster6	AT5G08310	Carubv10000227	CARHR204810	Thhalv10015588	2.19508	1.46497	1.05966	0.300189	0.833756	1.12999	1.63853	0.79824	0.526396
cluster6	AT5G08350	Carubv10001901	CARHR204720	Thhalv10014408	0.514462	0.745614	1.30057	0.669749	1.64922	1.32478	1.89597	1.08851	1.47696
cluster6	AT5G08660	Carubv10000422	CARHR204320	Thhalv10012930	1.13148	0.925914	1.02462	0.448146	0.673504	1.07693	0.821711	0.985972	2.45288
cluster6	AT5G09290	Carubv10001300	CARHR204120	Thhalv10013884	-0.239177	1.6218	0.0594762	0.796361	2.22608	-0.388325	0.750881	0.682304	0.213737
cluster6	AT5G09420	Carubv10000509	CARHR203980	Thhalv10013019	1.27848	0.675469	1.34128	0.70233	1.8151	1.24776	1.18679	1.47436	0.997077
cluster6	AT5G10190	Carubv10000817	CARHR203100	Thhalv10013341	1.06827	1.38685	1.12647	0.817345	1.00094	1.53678	1.33623	-0.128067	0.965136
cluster6	AT5G10380	Carubv10002980	CARHR202920	Thhalv10015812	0.957745	1.23687	0.621852	1.04622	0.830077	1.05577	0.554659	2.14244	0.564852
cluster6	AT5G10625	Carubv10002286	CARHR202680	Thhalv10015065	0.56991	0.186085	0.348176	0.451609	0.481072	0.619171	1.17606	0.561357	0.618235
cluster6	AT5G10750	Carubv10001562	CARHR202560	Thhalv10015969	0.419907	0.361178	0.466549	0.540833	0.520014	0.452808	1.38684	0.751529	0.921894
cluster6	AT5G10820	Carubv10002493	CARHR202470	Thhalv10013335	0.883765	0.981747	1.13699	1.07463	1.51728	1.53925	0.651475	0.727141	0.968301
cluster6	AT5G11680	Carubv10001970	CARHR201540	Thhalv10014678	0.467283	0.165271	0.538532	0.394042	0.686266	0.620596	1.05393	0.597445	0.260496
cluster6	AT5G11730	Carubv10001158	CARHR201490	Thhalv10013787	0.935599	0.826218	0.75533	0.830344	0.485542	0.947223	1.32672	0.315795	0.722006
cluster6	AT5G11920	Carubv10000634	CARHR201240	Thhalv10013192	1.83654	1.92023	0.872036	0.830408	1.52861	1.22741	1.07443	1.19115	1.3805
cluster6	AT5G12400	Carubv10000028	CARHR200700	Thhalv10012427	0.529225	1.16556	0.164499	-0.119028	0.246715	0.418808	0.818712	0.563006	0.54302
cluster6	AT5G13330	Carubv10001831	CARHR200110	Thhalv10014575	1.16653	0.335285	0.5727	0.589283	0.872834	1.36327	1.87875	1.09255	1.39609
cluster6	AT5G13590	Carubv10000066	CARHR199850	Thhalv10012490	0.845563	1.31422	0.747456	0.380821	0.695237	0.921456	0.527889	0.743292	0.972116
cluster6	AT5G13750	Carubv10002619	CARHR199690	Thhalv10013417	0.921998	0.422135	0.703655	-0.0179513	0.435834	0.529206	0.974477	1.18659	0.880906
cluster6	AT5G13810	Carubv10001690	CARHR199630	Thhalv10014389	0.612621	0.958204	0.652606	0.992147	0.835883	0.905824	1.17865	0.831243	1.22257
cluster6	AT5G14230	Carubv10000294	CARHR199110	Thhalv10012767	0.863014	1.09138	0.600493	0.0859075	0.955588	0.700052	1.10594	1.1191	0.41766
cluster6	AT5G14310	Carubv10000956	CARHR199020	Thhalv10013549	0.671269	0.653196	0.911724	0.78391	1.24452	0.938192	0.913353	1.43641	1.02337
cluster6	AT5G14480	Carubv10001154	CARHR198830	Thhalv10013782	0.710091	1.48605	0.86424	1.04805	1.87897	1.1928	1.33747	0.343444	1.07027
cluster6	AT5G14760	Carubv10003859	CARHR198550	Thhalv10015655	0.97935	0.598525	0.36442	-0.18441	0.479705	1.08486	1.75518	1.13191	0.498463
cluster6	AT5G15070	Carubv10000109	CARHR198250	Thhalv10012536	0.275219	1.40552	0.389818	-0.323361	1.38827	0.288637	1.08004	0.698558	0.527899
cluster6	AT5G15260	Carubv10001853	CARHR198060	Thhalv10015333	0.564196	0.0459295	0.39405	0.721082	0.678531	0.459088	0.833451	1.12698	1.05123
cluster6	AT5G15470	Carubv10000686	CARHR197850	Thhalv10013218	0.558199	0.765138	0.607639	0.264128	0.8569	0.622645	1.96054	0.940523	1.04801
cluster6	AT5G16110	Carubv10003852	CARHR197190	Thhalv10014345	-0.342099	0.395282	0.332769	0.861211	1.06251	0.855901	0.895427	0.743779	0.37482
cluster6	AT5G16370	Carubv10000624	CARHR196890	Thhalv10016036	0.85406	0.800978	1.1281	1.4559	1.02338	1.28431	1.6114	0.197291	-0.109919
cluster6	AT5G16880	Carubv10001100	CARHR196280	Thhalv10013718	0.674453	1.08676	0.609187	0.372994	0.900452	0.458324	1.00275	0.566526	0.615251
cluster6	AT5G17380	Carubv10000584	CARHR195830	Thhalv10013104	1.49439	1.17328	0.768845	0.52592	0.859729	0.657106	0.835408	0.770833	2.10624
cluster6	AT5G17390	Carubv10003378	CARHR195820	Thhalv10014279	1.12326	1.21091	0.674067	0.224807	1.09451	0.436565	0.183396	1.1734	2.09483
cluster6	AT5G17430	Carubv10002745	CARHR195780	Thhalv10015354	0.0290178	0.950852	0.500357	0.494189	1.13633	0.645795	2.03332	0.678372	0.817875
cluster6	AT5G17990	Carubv10000975	CARHR195080	Thhalv10013530	1.00807	1.16316	1.24461	0.193396	1.44309	1.00327	2.73756	0.0281055	0.347929
cluster6	AT5G18780	Carubv10022204	CARHR194210	Thhalv10013600	0.569984	1.42041	0.695289	0.610759	0.513466	0.59849	0.280246	1.41908	0.407691
cluster6	AT5G19000	Carubv10001097	CARHR194000	Thhalv10013699	0.776899	1.09092	0.844227	0.6808	1.21279	1.08734	1.24999	0.876131	0.277728
cluster6	AT5G20350	Carubv10000476	CARHR192490	Thhalv10012979	0.430129	0.677324	0.501942	0.498259	0.855341	0.54101	1.21433	1.31549	0.896592
cluster6	AT5G21010	Carubv10001086	CARHR191840	Thhalv10013671	0.482706	0.861512	0.728062	0.801555	1.08917	1.04894	1.29777	1.02557	0.316078
cluster6	AT5G21090	Carubv10001683	CARHR191780	Thhalv10014631	0.884006	0.965475	1.31201	1.20236	1.38321	1.52238	1.27483	0.963496	1.11529
cluster6	AT5G21900	Carubv10000690	CARHR191640	Thhalv10015473	0.958737	1.67852	1.27104	0.981027	1.51935	1.53386	2.12991	-0.946852	-0.0632937
cluster6	AT5G21940	Carubv10001723	CARHR191590	Thhalv10014420	0.183173	0.999453	0.678079	1.33196	1.57494	1.38906	0.799976	0.600297	1.6976
cluster6	AT5G21990	Carubv10000579	CARHR191540	Thhalv10013111	0.630502	0.829598	0.301507	0.320729	0.225728	0.488417	2.35387	1.01442	0.459276
cluster6	AT5G22000	Carubv10001170	CARHR191530	Thhalv10013828	0.63596	0.74333	0.85695	1.07677	0.962681	1.29941	1.06274	0.814378	0.743746
cluster6	AT5G22060	Carubv10001042	CARHR191470	Thhalv10013655	1.08951	1.33535	0.876172	0.375781	1.12125	1.20645	1.04887	1.11338	0.255509
cluster6	AT5G22220	Carubv10003027	CARHR191330	Thhalv10015650	0.463983	0.867272	0.180951	0.0503866	1.22363	-0.122355	0.765374	0.673391	0.526702
cluster6	AT5G22450	Carubv10002763	CARHR191080	Thhalv10012493	0.815353	1.56181	0.130237	-0.29231	-0.187343	0.777732	1.04648	1.24061	0.996733
cluster6	AT5G22780	Carubv10003049	CARHR190820	Thhalv10012556	0.901554	1.09056	0.723043	0.397716	1.27964	0.670296	0.628984	0.609027	0.360928
cluster6	AT5G23130	Carubv10001102	CARHR190400	Thhalv10004348	0.849693	1.14723	0.758127	0.614325	1.17869	0.960048	0.687964	1.29919	0.584039
cluster6	AT5G23520	Carubv10001090	CARHR190020	Thhalv10004341	1.05194	1.69598	1.23744	0.73176	1.55077	1.26881	0.734688	0.318035	0.971772
cluster6	AT5G24070	Carubv10003419	CARHR189520	Thhalv10004528	0.923784	0.251655	0.54101	0.0508305	0.43839	1.17076	1.84079	1.40719	-0.210122
cluster6	AT5G24090	Carubv10001507	CARHR189500	Thhalv10004675	1.14412	0.967567	0.773538	0.704477	0.955768	1.03478	1.16803	0.842	1.69372
cluster6	AT5G24270	Carubv10001908	CARHR189260	Thhalv10004891	0.913952	0.656678	0.906343	0.409591	1.17268	0.495621	0.831874	-0.066499	1.0722
cluster6	AT5G24590	Carubv10000892	CARHR188860	Thhalv10004105	0.738532	1.20097	0.998033	0.662521	0.88225	0.687143	1.63143	0.377033	0.242167
cluster6	AT5G24810	Carubv10003319	CARHR188650	Thhalv10003586	1.29635	1.50368	1.07853	0.365004	1.28539	1.01824	1.79393	1.64238	1.13445
cluster6	AT5G25540	Carubv10001953	CARHR187840	Thhalv10004997	0.502743	0.523011	0.739185	0.772788	1.08859	0.856097	0.666012	0.829858	0.714913
cluster6	AT5G26749	Carubv10003911	CARHR186830	Thhalv10005088	0.660542	1.42483	0.920228	0.699258	1.20666	1.2507	0.689058	-0.503663	1.68153
cluster6	AT5G27920	Carubv10003640	CARHR186520	Thhalv10003812	1.11711	0.479644	0.72492	0.826544	0.692221	0.928919	1.01685	1.06341	1.14031
cluster6	AT5G35200	Carubv10007821	CARHR217300	Thhalv10003447	0.951826	1.50059	0.902206	0.486431	1.40605	1.22074	1.63036	0.969956	1.76944
cluster6	AT5G36220	Carubv10004631	CARHR216510	Thhalv10004066	0.954673	1.14352	0.691482	-0.366602	0.72475	1.32222	1.3764	0.250482	0.175746
cluster6	AT5G37480	Carubv10005887	CARHR215460	Thhalv10028111	0.755738	1.06836	1.26118	1.2201	1.6409	1.7089	1.70082	0.35115	0.290908
cluster6	AT5G37600	Carubv10005130	CARHR215260	Thhalv10027817	1.8199	0.822654	0.966253	1.05643	1.03641	1.22876	1.6184	0.439246	0.938333
cluster6	AT5G38260	Carubv10019593	CARHR214350	Thhalv10027672	0.477397	0.992369	0.674217	0.79717	0.348197	0.469096	1.4581	2.29601	0.466364
cluster6	AT5G38895	Carubv10005696	CARHR263640	Thhalv10027926	0.334732	0.556903	0.852498	0.675647	1.6321	0.952471	1.87497	0.0854315	0.567294
cluster6	AT5G39380	Carubv10004618	CARHR263020	Thhalv10027728	0.483409	1.33349	0.682305	0.307648	0.0186122	1.10798	0.277652	1.33517	0.244745
cluster6	AT5G39970	Carubv10006418	CARHR262180	Thhalv10027668	1.06725	1.14123	0.799763	0.200296	1.25742	0.845326	0.327595	1.47359	0.488175
cluster6	AT5G40370	Carubv10006067	CARHR261730	Thhalv10027999	0.572595	0.178933	0.691898	0.552484	1.00283	0.817042	2.03009	0.548503	0.395133
cluster6	AT5G40760	Carubv10004603	CARHR213760	Thhalv10027727	0.942469	1.0815	0.756271	0.302703	1.39502	0.749913	1.56034	1.14823	1.97694
cluster6	AT5G40880	Carubv10006391	CARHR140940	Thhalv10027745	0.565019	1.02019	0.289297	0.0148728	0.351695	0.620227	0.829976	0.512915	1.22433
cluster6	AT5G41080	Carubv10005058	CARHR213290	Thhalv10027797	0.606897	0.892346	0.809904	0.57596	1.16903	0.59373	1.42899	0.473526	1.89347
cluster6	AT5G42420	Carubv10026693	CARHR285130	Thhalv10003241	0.183615	0.220132	0.529867	0.497747	0.398002	0.577759	1.34187	0.431999	0.796728
cluster6	AT5G42650	Carubv10028569	CARHR181560	Thhalv10003180	0.337818	0.112983	1.11308	0.752176	1.74052	1.75123	2.19525	1.46014	0.491964
cluster6	AT5G42930	Carubv10026339	CARHR181160	Thhalv10003368	2.47467	0.61144	1.78006	-0.213832	1.65835	0.672136	2.37639	-0.41271	2.40908
cluster6	AT5G42940	Carubv10026015	CARHR181150	Thhalv10003162	1.09862	1.36488	0.803057	0.609123	0.979987	1.22238	1.37261	0.22585	0.692727
cluster6	AT5G43100	Carubv10027752	CARHR180880	Thhalv10003167	0.658768	0.548797	0.704611	0.744877	1.01466	0.902085	0.846731	0.348007	0.492396
cluster6	AT5G43380	Carubv10026759	CARHR180230	Thhalv10003247	1.34095	0.751608	1.20157	0.395863	0.719338	1.44671	1.19621	0.462558	0.221424
cluster6	AT5G43760	Carubv10026222	CARHR179720	Thhalv10003358	0.988951	0.6752	0.273444	1.03241	0.372676	0.790633	1.41335	1.44004	1.2897
cluster6	AT5G44090	Carubv10027636	CARHR179190	Thhalv10003178	0.814856	1.16526	1.07198	0.793688	1.11586	0.960777	0.929817	0.658093	1.36348
cluster6	AT5G44240	Carubv10027927	CARHR178990	Thhalv10003135	1.17194	1.18935	0.679034	0.181044	0.723503	0.641007	1.16532	1.4286	0.102383
cluster6	AT5G44480	Carubv10026495	CARHR178600	Thhalv10000899	1.45072	1.05264	1.10307	0.58468	1.60734	0.752594	1.52631	1.17496	1.35866
cluster6	AT5G44790	Carubv10025986	CARHR178080	Thhalv10000758	0.873774	0.871531	0.0290569	-0.05963	0.439078	-0.226114	1.71601	0.879105	1.23561
cluster6	AT5G45050	Carubv10025744	CARHR177100	Thhalv10001165	0.990494	1.76239	0.800319	0.697158	1.4573	1.28567	1.73211	0.544255	0.483382
cluster6	AT5G45710	Carubv10026722	CARHR176260	Thhalv10000950	0.617603	0.923552	0.853413	0.474145	1.31709	1.39301	1.93446	1.70039	0.481472
cluster6	AT5G45740	Carubv10028475	CARHR176240	Thhalv10001078	0.381075	0.735065	1.63993	2.28159	1.01011	1.88938	1.79779	0.864005	1.01982
cluster6	AT5G45750	Carubv10027116	CARHR176230	Thhalv10001021	0.975357	1.21683	0.788264	1.13472	1.75346	1.50402	2.23878	0.152163	0.79809
cluster6	AT5G45900	Carubv10025802	CARHR176060	Thhalv10000804	0.815292	1.10434	0.392305	0.324941	0.878195	0.470081	0.885803	0.648502	0.34662
cluster6	AT5G46230	Carubv10027170	CARHR175560	Thhalv10001128	0.577371	0.11676	0.425961	0.587156	0.744782	0.882673	2.46358	1.08513	0.662862
cluster6	AT5G46250	Carubv10026475	CARHR175530	Thhalv10000879	0.612982	0.718862	0.833549	0.514988	0.936098	0.893173	1.86329	0.571302	1.3817
cluster6	AT5G46760	Carubv10028441	CARHR174740	Thhalv10000808	0.944999	0.639913	0.38348	0.0829968	0.726937	0.443597	1.00915	0.23494	0.478112
cluster6	AT5G47100	Carubv10027124	CARHR174290	Thhalv10001023	0.226029	0.767328	0.873085	0.891347	0.998334	1.07766	1.12652	-0.207584	1.15371
cluster6	AT5G47120	Carubv10028224	CARHR174270	Thhalv10001130	0.741949	0.373413	0.842711	0.921558	0.98228	1.36733	1.07633	0.0275441	0.379252
cluster6	AT5G47710	Carubv10027258	CARHR173610	Thhalv10001057	0.100882	0.408803	0.707397	0.867768	1.35155	1.18314	1.12566	0.212891	0.18684
cluster6	AT5G48450	Carubv10026290	CARHR183630	Thhalv10003863	0.789859	1.0656	0.928099	0.723927	1.17142	1.48754	1.24726	1.22277	-0.32814
cluster6	AT5G48655	Carubv10027099	CARHR183280	Thhalv10004921	0.518211	0.461768	1.15981	1.30597	1.31272	1.73448	1.72101	1.39711	1.05431
cluster6	AT5G49570	Carubv10028450	CARHR287990	Thhalv10003714	0.910529	1.17545	0.3097	0.336668	0.831391	0.537497	0.558213	0.672449	0.675203
cluster6	AT5G49680	Carubv10025732	CARHR259160	Thhalv10000004	1.82615	2.12272	0.496685	0.765429	1.07983	1.09054	0.411329	1.00708	0.668158
cluster6	AT5G49700	Carubv10028261	CARHR259140	Thhalv10009678	0.543069	1.01173	0.918956	0.898449	1.13812	1.53797	1.08436	1.31682	-0.176787
cluster6	AT5G49760	Carubv10027977	CARHR259030	Thhalv10012589	0.980339	1.27585	0.868063	0.309283	1.18844	0.508494	0.867219	1.19278	1.57082
cluster6	AT5G50380	Carubv10026007	CARHR229310	Thhalv10012863	0.89271	0.765779	0.520147	0.453895	0.804558	0.372006	1.03489	0.0505511	1.10495
cluster6	AT5G50430	Carubv10027028	CARHR257870	Thhalv10014520	0.854979	0.907049	1.12373	0.62031	1.24027	1.16414	1.4377	1.25058	0.928889
cluster6	AT5G50530	Carubv10028624	CARHR257720	Thhalv10013164	-0.403755	0.2122	1.84584	0.858549	1.26533	0.741695	1.15977	0.615455	0.703547
cluster6	AT5G51060	Carubv10028541	CARHR257030	Thhalv10012613	2.32217	1.76876	0.457782	0.0636417	1.09299	0.116589	0.694826	0.411888	0.835879
cluster6	AT5G51160	Carubv10028013	CARHR256890	Thhalv10015548	0.521686	1.23813	0.70165	0.379641	1.35204	1.4659	1.44887	1.02771	1.22417
cluster6	AT5G51890	Carubv10026787	CARHR264810	Thhalv10014117	1.23797	0.141365	0.288014	0.31076	0.642907	0.600603	1.28988	-0.0173415	0.447895
cluster6	AT5G52200	Carubv10005830	CARHR265120	Thhalv10014782	0.432082	0.393574	0.642087	0.338372	0.783307	0.749879	1.35277	0.499189	0.202171
cluster6	AT5G52260	Carubv10027541	CARHR265230	Thhalv10014388	-0.177869	0.380214	1.27023	1.23659	0.56473	1.63519	1.9715	1.1773	1.07997
cluster6	AT5G52530	Carubv10027942	CARHR233070	Thhalv10024596	0.954384	1.43902	0.711899	0.395993	0.860241	1.15933	1.41322	1.36934	1.15155
cluster6	AT5G53130	Carubv10025973	CARHR266160	Thhalv10012801	0.863635	1.50574	0.351515	0.69111	1.1032	0.551251	1.24631	0.568542	1.51135
cluster6	AT5G53310	Carubv10027123	CARHR266350	Thhalv10014692	0.665576	0.634565	0.819317	0.81923	1.13061	1.06502	1.31306	0.820736	0.488768
cluster6	AT5G53550	Carubv10027623	CARHR266690	Thhalv10012886	1.81712	1.49995	0.925291	1.70789	0.661251	1.25533	2.25769	0.230993	0.54002
cluster6	AT5G53570	Carubv10028664	CARHR266700	Thhalv10013153	1.11777	0.856265	1.10489	0.806173	1.23249	1.24305	1.22268	0.732601	0.873303
cluster6	AT5G53830	Carubv10026984	CARHR266970	Thhalv10014514	0.82057	1.11003	0.413905	0.231866	0.804397	0.902128	2.12424	-0.0617838	0.822042
cluster6	AT5G54110	Carubv10026954	CARHR267310	Thhalv10014374	0.495744	0.856698	0.639646	0.819726	0.946071	0.911629	0.948411	1.58282	0.158435
cluster6	AT5G54170	Carubv10026389	CARHR267380	Thhalv10013518	1.09638	1.20538	1.2113	0.819503	1.36584	1.0976	1.74873	1.0248	1.76542
cluster6	AT5G55050	Carubv10026598	CARHR268370	Thhalv10015846	1.78176	0.995849	0.712295	1.94174	-0.149443	0.734431	0.247384	2.40007	1.28349
cluster6	AT5G55100	Carubv10026019	CARHR268440	Thhalv10015403	0.970797	2.45298	1.14636	-0.00704336	1.8723	0.95962	1.02895	0.93258	0.868897
cluster6	AT5G56170	Carubv10027253	CARHR269570	Thhalv10014845	0.323975	0.577643	0.939709	1.00526	1.044	1.21859	0.664503	0.711803	0.455844
cluster6	AT5G56340	Carubv10026533	CARHR269780	Thhalv10013831	0.675832	0.633711	0.78282	0.846284	0.900981	0.664137	1.1645	0.767451	0.557717
cluster6	AT5G56460	Carubv10027923	CARHR270100	Thhalv10015701	0.836745	0.6142	0.605683	0.47521	0.722508	0.867019	2.03878	1.23813	1.40333
cluster6	AT5G56750	Carubv10026705	CARHR270500	Thhalv10014006	-0.204637	0.744207	0.55527	0.201362	1.0754	0.43653	0.982281	0.552084	0.713189
cluster6	AT5G56880	Carubv10027599	CARHR270630	Thhalv10015576	0.296213	0.785619	0.677181	-0.0584852	2.27352	1.35443	1.94339	1.62502	1.01828
cluster6	AT5G57000	Carubv10027175	CARHR270740	Thhalv10014757	0.470843	0.876856	0.844826	0.923284	1.61332	1.30705	0.625173	1.07696	1.15765
cluster6	AT5G57015	Carubv10028520	CARHR270760	Thhalv10013573	0.755455	1.46921	0.995197	0.83024	1.73211	1.181	1.79022	0.225869	1.05263
cluster6	AT5G57580	Carubv10027506	CARHR271350	Thhalv10012939	0.939796	1.418	1.09791	0.832344	1.39145	1.11551	2.07411	0.897239	1.38239
cluster6	AT5G57710	Carubv10025814	CARHR271460	Thhalv10012564	1.68429	1.51775	0.779779	1.58737	0.948704	1.00087	1.61195	0.726595	0.547251
cluster6	AT5G57910	Carubv10027722	CARHR271690	Thhalv10014665	0.706969	0.840269	1.02072	0.509642	1.59595	1.27616	0.286551	1.33691	0.323834
cluster6	AT5G58375	Carubv10028567	CARHR272210	Thhalv10015157	0.122324	0.589564	0.800559	0.880624	1.29893	1.27731	1.76126	0.957813	1.65808
cluster6	AT5G58380	Carubv10028322	CARHR272220	Thhalv10013486	1.14993	1.11162	0.858149	0.639273	1.22803	1.06222	0.850505	0.70469	0.644019
cluster6	AT5G58690	Carubv10026144	CARHR272600	Thhalv10013061	0.477651	0.929669	0.627758	-0.116792	1.23865	0.738295	1.40928	1.13577	0.504537
cluster6	AT5G58720	Carubv10028185	CARHR272630	Thhalv10013268	0.871955	1.46054	1.14056	0.962886	1.92216	1.29323	0.73072	1.39949	0.863583
cluster6	AT5G59420	Carubv10026378	CARHR285790	Thhalv10013498	1.02361	1.22688	0.903257	0.54011	1.05546	0.952765	1.675	0.686195	0.748601
cluster6	AT5G59450	Carubv10028208	CARHR285820	Thhalv10013016	0.918303	1.65416	0.834368	0.737429	0.961238	1.35819	1.571	1.53352	1.38899
cluster6	AT5G59480	Carubv10026922	CARHR285850	Thhalv10014321	0.440488	-0.0103473	0.450064	0.24988	0.871017	0.823696	1.05226	0.613355	-0.112245
cluster6	AT5G59700	Carubv10025884	CARHR273270	Thhalv10012688	0.798323	1.78707	0.942373	0.313215	1.72511	1.60926	1.61884	0.858861	0.700264
cluster6	AT5G60410	Carubv10025862	CARHR274090	Thhalv10012623	1.15586	1.54243	0.908557	0.415526	1.40259	1.37733	0.894615	0.927139	0.346428
cluster6	AT5G60950	Carubv10028146	CARHR274630	Thhalv10004931	0.968173	0.959378	0.976304	0.741317	1.57092	1.16984	0.394928	-0.197288	1.61355
cluster6	AT5G61600	Carubv10028209	CARHR275390	Thhalv10005566	0.766247	0.371796	0.0885428	0.216184	0.887056	1.32583	1.58417	1.06992	0.83948
cluster6	AT5G61990	Carubv10025815	CARHR275790	Thhalv10003592	1.16167	0.633784	0.610608	0.547752	0.606224	0.549078	0.983654	0.0270687	0.33423
cluster6	AT5G62000	Carubv10025860	CARHR275800	Thhalv10003641	0.752899	1.03445	0.557256	0.490284	0.754553	0.562356	0.94804	0.440128	0.665278
cluster6	AT5G62180	Carubv10011599	CARHR275970	Thhalv10005595	1.31232	0.859502	0.897641	1.09719	1.37363	1.69542	0.80774	1.0866	1.22473
cluster6	AT5G62560	Carubv10026171	CARHR276340	Thhalv10003926	0.861574	1.19268	0.944134	1.29949	1.49992	1.6098	0.81395	0.667604	0.685315
cluster6	AT5G62630	Carubv10025995	CARHR276440	Thhalv10003739	1.09358	1.22839	0.191388	0.363573	0.626003	0.374709	2.32241	0.0845761	1.27072
cluster6	AT5G63320	Carubv10028607	CARHR277170	Thhalv10003590	0.768805	1.20379	0.956974	0.285003	1.27477	1.17914	0.901401	1.25417	0.885687
cluster6	AT5G63370	Carubv10016824	CARHR277200	Thhalv10003850	0.489155	0.9852	0.73508	0.364127	0.943475	0.753782	0.905713	1.14307	0.642962
cluster6	AT5G63610	Carubv10028553	CARHR277490	Thhalv10004142	0.557264	1.00385	0.276168	-0.0725651	0.568566	0.347309	0.527759	0.453182	0.679349
cluster6	AT5G63770	Carubv10025976	CARHR277680	Thhalv10003726	1.12909	1.00917	0.754192	0.123039	0.824992	0.747208	1.24887	0.290789	0.654855
cluster6	AT5G64090	Carubv10026400	CARHR278000	Thhalv10004233	0.605393	1.04062	1.05498	1.3222	1.38155	1.41705	1.17297	0.637028	0.4802
cluster6	AT5G64130	Carubv10027384	CARHR278040	Thhalv10005143	-0.00689881	0.361981	0.760168	0.824443	0.916765	1.17721	1.07553	0.113922	0.522618
cluster6	AT5G64260	Carubv10026839	CARHR278170	Thhalv10005461	0.495994	0.701049	0.751107	0.68415	1.01288	0.808162	1.30783	0.427379	-0.0687191
cluster6	AT5G65270	Carubv10027070	CARHR279220	Thhalv10004873	1.05005	0.990721	0.995848	0.841178	1.38958	1.24049	1.60121	0.804126	0.686757
cluster6	AT5G65925	Carubv10027276	CARHR279940	Thhalv10005632	0.720738	0.502192	0.668677	2.15718	0.740266	1.51199	0.253267	1.28485	0.982612
cluster6	AT5G66200	Carubv10026056	CARHR281530	Thhalv10027681	0.567463	1.02179	0.590866	0.545166	0.960927	1.13855	1.34479	0.795244	0.29573
cluster6	AT5G66390	Carubv10027498	CARHR281330	Thhalv10004548	1.2983	1.31995	0.906382	0.275551	0.802208	0.878687	1.3568	0.452222	0.565582
cluster6	AT5G66490	Carubv10028357	CARHR281260	Thhalv10005334	0.308149	1.15692	1.56759	1.16221	1.03019	1.0827	1.44974	-0.0173415	2.54312
cluster6	AT5G66700	Carubv10027040	CARHR281020	Thhalv10005612	0.239954	1.0288	0.0232974	-0.439542	2.34514	0.504118	1.35801	1.2715	1.56008
cluster6	AT5G66730	Carubv10026275	CARHR280990	Thhalv10004063	0.809293	0.940514	0.853667	0.62936	0.819156	0.923997	1.23217	1.04383	0.489338
cluster6	AT5G67640	Carubv10028295	CARHR279950	Thhalv10005075	0.421424	0.648587	0.877545	0.703615	1.94414	1.00441	0.074196	0.517432	1.96198
cluster7_orange_Cru	AT1G01220	Carubv10028118	CARHR001250	Thhalv10006637	-0.17731	0.00918635	-0.89287	-0.828931	-0.447319	-0.838434	1.08087	0.0137663	0.651695
cluster7_orange_Cru	AT1G01660	Carubv10008712	CARHR000690	Thhalv10007636	-0.25866	0.431957	-0.689979	-1.36233	0.0182618	-0.762197	2.95927	0.22287	0.800337
cluster7_orange_Cru	AT1G02380	Carubv10010187	CARHR001700	Thhalv10009390	-0.373889	-0.199398	-0.664025	-1.44302	-0.662379	-0.789477	1.28856	0.580873	-0.467557
cluster7_orange_Cru	AT1G02460	Carubv10008847	CARHR001780	Thhalv10007481	0.794496	-0.243695	-0.276011	-0.276005	-0.892627	-0.335001	1.32483	-1.2571	-1.37009
cluster7_orange_Cru	AT1G03457	Carubv10009093	CARHR002830	Thhalv10007707	-0.871013	-0.258623	-0.683829	-0.499002	-0.531035	-1.10787	0.766184	0.331713	0.693083
cluster7_orange_Cru	AT1G03650	Carubv10010366	CARHR002980	Thhalv10008981	-0.127623	-0.154478	0.577566	0.330028	0.396413	0.511614	1.54611	0.528001	0.115646
cluster7_orange_Cru	AT1G03950	Carubv10010296	CARHR003290	Thhalv10008774	0.174041	0.00515574	0.183255	0.2183	0.405559	-0.0793573	1.9206	0.258226	0.0526816
cluster7_orange_Cru	AT1G04440	Carubv10012017	CARHR003780	Thhalv10007554	0.310221	0.230246	0.14429	-0.118889	0.294437	-0.102099	1.27972	0.67691	0.09311
cluster7_orange_Cru	AT1G04570	Carubv10008801	CARHR003920	Thhalv10007302	1.43972	-1.07919	0.000801	-0.577064	1.26315	0.339121	0.936234	-0.32179	-3.17646
cluster7_orange_Cru	AT1G04920	Carubv10008160	CARHR004320	Thhalv10006639	0.161466	0.278668	-1.14018	-0.878962	-0.583183	-0.414556	1.50423	0.352802	0.361029
cluster7_orange_Cru	AT1G05320	Carubv10011474	CARHR004810	Thhalv10006865	0.589754	-0.00522389	-0.207834	-0.428644	-0.295527	-0.646455	1.69202	1.41264	0.955606
cluster7_orange_Cru	AT1G05630	Carubv10008138	CARHR005130	Thhalv10006606	0.311973	0.971734	-0.744038	-0.0696605	0.540505	-0.621838	2.53697	-0.0799381	1.42623
cluster7_orange_Cru	AT1G06160	Carubv10010105	CARHR005690	Thhalv10008518	0.644213	-1.2541	0.571622	0.484195	0.253782	0.954074	1.18305	0.498471	0.00172587
cluster7_orange_Cru	AT1G07060	Carubv10010114	CARHR006750	Thhalv10009490	0.273722	-0.0801337	-0.959418	0.144167	-0.875893	-0.777323	3.10823	0.420113	0.593941
cluster7_orange_Cru	AT1G07380	Carubv10008356	CARHR007090	Thhalv10006859	-0.115881	-0.271001	-0.990277	-0.757204	-0.969885	-0.633545	1.15754	-0.203607	-0.151707
cluster7_orange_Cru	AT1G07880	Carubv10010840	CARHR007690	Thhalv10008001	-0.628948	-0.367295	0.0229524	-0.73051	0.193331	-0.305507	1.43716	-0.195883	-0.451478
cluster7_orange_Cru	AT1G09080	Carubv10008520	CARHR008970	Thhalv10009566	1.16115	1.66797	-0.0199789	-0.648437	0.196406	0.454912	2.21284	0.39871	-1.35074
cluster7_orange_Cru	AT1G09460	Carubv10009486	CARHR009440	Thhalv10008261	0.00178595	-0.0191804	-0.0502282	0.220773	0.285894	-0.10811	1.28948	0.219716	0.043129
cluster7_orange_Cru	AT1G09650	Carubv10002539	CARHR024930	Thhalv10009873	-0.49276	1.11044	0.301077	0.157445	-0.809974	0.310565	2.39795	-0.0173415	0.577137
cluster7_orange_Cru	AT1G09680	Carubv10008618	CARHR009650	Thhalv10007116	0.366345	-0.478602	0.0135808	-0.339269	0.307722	-0.173614	1.93988	-0.505967	0.0404215
cluster7_orange_Cru	AT1G09830	Carubv10008837	CARHR009850	Thhalv10007333	-0.21239	-0.509431	-0.337519	-0.286451	-0.281778	-0.572353	1.52713	-0.579473	-0.398184
cluster7_orange_Cru	AT1G09960	Carubv10008890	CARHR010080	Thhalv10007390	0.339978	0.363068	0.294544	0.195372	0.240276	0.653233	1.02304	-0.0103987	0.0589813
cluster7_orange_Cru	AT1G11090	Carubv10011807	CARHR011280	Thhalv10010022	-0.464383	-0.977576	0.0109133	-0.500094	-0.936668	-1.00261	0.973872	0.886443	0.498432
cluster7_orange_Cru	AT1G11390	Carubv10008587	CARHR011630	Thhalv10007063	0.345159	0.342973	0.148247	0.0331263	0.0599556	0.30562	1.20135	0.625042	0.615782
cluster7_orange_Cru	AT1G11780	Carubv10009622	CARHR012120	Thhalv10008060	0.129168	-0.307945	0.322439	0.152489	-0.207259	0.212012	1.00477	-0.172726	-0.251543
cluster7_orange_Cru	AT1G11790	Carubv10009627	CARHR012130	Thhalv10007886	0.248147	0.176282	0.164105	0.238044	0.177794	-0.023275	1.05629	-0.291748	-0.173429
cluster7_orange_Cru	AT1G13090	Carubv10011330	CARHR013450	Thhalv10007466	-0.607314	-0.831052	-0.816342	-1.00836	-1.1282	-1.53673	1.979	0.155464	0.531669
cluster7_orange_Cru	AT1G13610	Carubv10011195	CARHR013950	Thhalv10009744	-2.44244	-0.11643	0.870471	-0.730184	0.113401	0.128194	0.915964	-0.634339	-0.717128
cluster7_orange_Cru	AT1G14290	Carubv10010052	CARHR014710	Thhalv10008529	-0.333522	-0.11839	0.065577	0.210423	-0.081525	0.0263596	1.33106	0.31882	0.514875
cluster7_orange_Cru	AT1G14360	Carubv10011652	CARHR014800	Thhalv10008161	0.453642	0.221224	0.238766	0.289838	0.306938	0.731281	1.32439	0.367721	0.128935
cluster7_orange_Cru	AT1G14430	Carubv10011386	CARHR014870	Thhalv10007241	0.125217	0.478048	0.262484	0.214104	-0.00436398	0.741273	1.79385	-0.528442	-0.738965
cluster7_orange_Cru	AT1G15020	Carubv10008729	CARHR015560	Thhalv10007339	0.220802	0.0703588	0.0507503	-0.111215	0.287268	0.163638	1.06787	-0.172863	0.175435
cluster7_orange_Cru	AT1G15210	Carubv10012050	CARHR015730	Thhalv10006563	-0.288173	0.00766681	-0.735535	-0.236472	-1.29183	-0.569365	1.27569	-0.550739	1.48098
cluster7_orange_Cru	AT1G16490	Carubv10011190	CARHR016960	Thhalv10008436	0.0608251	-0.453143	-1.47234	-1.18811	-0.328571	0.419212	1.31025	0.581569	0.902986
cluster7_orange_Cru	AT1G18670	Carubv10008466	CARHR019300	Thhalv10006926	-0.246016	0.164908	-0.404738	-0.809228	-0.759594	-0.231014	1.44763	-0.292556	0.150797
cluster7_orange_Cru	AT1G19230	Carubv10008247	CARHR019830	Thhalv10006725	0.55549	0.398764	0.0332528	-0.730511	0.575907	0.542794	1.07328	0.243865	0.308342
cluster7_orange_Cru	AT1G19440	Carubv10011929	CARHR020020	Thhalv10007370	0.168336	0.281567	-0.0575605	-0.109007	-0.259175	-0.0840538	2.75993	-0.260053	0.698161
cluster7_orange_Cru	AT1G20480	Carubv10008735	CARHR020930	Thhalv10007257	-0.0591455	-0.0516438	-0.484683	-0.240858	-0.244022	-0.859694	1.17924	0.0214205	-0.17311
cluster7_orange_Cru	AT1G20850	Carubv10009557	CARHR021280	Thhalv10008032	0.853043	0.616651	0.282564	0.0965889	0.431185	0.124335	1.12566	0.426145	0.326875
cluster7_orange_Cru	AT1G21830	Carubv10010313	CARHR022190	Thhalv10008805	0.195872	-0.167036	0.0225882	0.575276	-0.229432	0.202863	1.06651	0.301028	-0.0635658
cluster7_orange_Cru	AT1G22190	Carubv10009949	CARHR022540	Thhalv10008326	-0.23002	0.194905	0.158392	0.362708	0.752708	0.616969	1.16282	-0.141461	0.0279856
cluster7_orange_Cru	AT1G22220	Carubv10009775	CARHR022570	Thhalv10010014	-0.645453	-0.353288	-0.310494	0.259072	-0.0260082	0.169571	2.65374	-0.0686209	-0.756059
cluster7_orange_Cru	AT1G22230	Carubv10009798	CARHR022580	Thhalv10008264	-0.296037	0.264034	-0.0813366	0.552286	0.418044	0.245956	2.3647	1.89247	0.221848
cluster7_orange_Cru	AT1G23330	Carubv10009040	CARHR023780	Thhalv10007569	0.0462457	0.259621	0.122813	-0.47082	0.528209	-0.422966	3.1454	0.604143	-0.162534
cluster7_orange_Cru	AT1G23450	Carubv10011268	CARHR023880	Thhalv10006630	1.12837	1.67747	-0.453334	0.0873682	-0.610082	-0.202563	1.03832	0.506122	-0.0808289
cluster7_orange_Cru	AT1G24530	Carubv10010931	CARHR026560	Thhalv10010028	0.490654	-1.11732	-0.0979805	0.473673	-1.08147	-0.32612	2.90934	-0.0692798	-0.924147
cluster7_orange_Cru	AT1G25500	Carubv10011975	CARHR025960	Thhalv10007483	-0.613515	-0.365768	-0.445997	-0.0340578	-0.377516	0.296289	1.05787	-0.524138	0.113504
cluster7_orange_Cru	AT1G26580	Carubv10008961	CARHR025390	Thhalv10009562	0.207421	0.476014	0.316636	0.0616482	0.516374	0.0552796	1.04005	0.355096	0.206873
cluster7_orange_Cru	AT1G26930	Carubv10009257	CARHR025010	Thhalv10007668	-0.321939	-0.275341	-0.0727339	-0.124127	0.0403896	-0.0464406	1.50882	0.240019	0.629463
cluster7_orange_Cru	AT1G27120	Carubv10008510	CARHR024750	Thhalv10006986	-0.575301	-0.159303	-0.998603	-0.560871	-0.46273	-1.12781	1.3095	0.122287	0.479953
cluster7_orange_Cru	AT1G29100	Carubv10010851	CARHR028410	Thhalv10009052	1.43632	-1.27149	-1.69301	0.84111	-0.105853	0.736052	0.950457	-0.484048	-0.174509
cluster7_orange_Cru	AT1G29160	Carubv10010402	CARHR028470	Thhalv10008914	0.0412859	0.0442291	0.457098	0.711474	-0.123502	0.773298	1.63916	0.8341	0.659437
cluster7_orange_Cru	AT1G30080	Carubv10011427	CARHR029330	Thhalv10007753	0.627584	0.159646	0.48946	0.051762	0.633952	0.530394	1.74382	0.444437	-0.456533
cluster7_orange_Cru	AT1G30400	Carubv10008084	CARHR029780	Thhalv10006546	0.313114	0.37702	-0.361203	-0.663109	-0.42345	-0.00822798	1.26826	0.545956	0.207159
cluster7_orange_Cru	AT1G30825	Carubv10012303	CARHR030300	Thhalv10008211	0.269693	0.230079	0.33545	0.166773	0.451663	0.419162	1.09231	0.754715	-0.0499761
cluster7_orange_Cru	AT1G31280	Carubv10008180	CARHR030750	Thhalv10006643	0.388159	0.627922	-0.123748	-0.516206	-0.517393	0.307572	1.19573	0.310052	0.401789
cluster7_orange_Cru	AT1G33540	Carubv10012575	CARHR032990	Thhalv10007570	-1.02062	0.782129	0.338559	0.646904	-0.27308	0.997417	0.869344	-0.140443	0.275193
cluster7_orange_Cru	AT1G34270	Carubv10009012	CARHR033760	Thhalv10007515	-0.170747	-0.228164	-0.202395	-0.406208	-0.907206	-0.612392	1.23528	-0.388589	0.370452
cluster7_orange_Cru	AT1G35830	Carubv10012223	CARHR034600	Thhalv10001873	-0.130317	0.00908157	-0.358824	0.187142	-0.210533	-0.179429	1.61866	-0.312367	0.302687
cluster7_orange_Cru	AT1G48000	Carubv10010143	CARHR037630	Thhalv10012051	0.18001	-0.646894	-0.164956	-0.568174	-0.371931	-0.697345	1.59296	0.349299	0.637716
cluster7_orange_Cru	AT1G48510	Carubv10011894	CARHR038140	Thhalv10011732	-0.143456	0.340659	0.715932	-0.121557	0.63591	0.503606	3.27777	-0.409547	0.708133
cluster7_orange_Cru	AT1G48830	Carubv10010369	CARHR038830	Thhalv10011801	-0.199886	-0.260957	0.0402377	0.0855526	0.091551	-0.0507114	1.06011	-0.281233	-0.276216
cluster7_orange_Cru	AT1G48960	Carubv10010256	CARHR038970	Thhalv10011768	-0.0166639	-0.524935	-0.332124	-0.442307	-0.0338663	0.791241	2.62257	1.2222	-0.755431
cluster7_orange_Cru	AT1G50410	Carubv10011822	CARHR040420	Thhalv10011211	0.485435	0.640145	0.179191	-0.206014	-0.00867187	0.226044	1.00638	0.466421	0.591296
cluster7_orange_Cru	AT1G53100	Carubv10011618	CARHR043320	Thhalv10012067	-0.779311	0.545162	-0.0103415	-0.959133	-0.325571	-0.0443821	1.38161	-1.18291	0.779199
cluster7_orange_Cru	AT1G53320	Carubv10009251	CARHR043550	Thhalv10011566	0.178285	0.381174	0.185745	0.306746	0.547693	0.0607612	1.60447	0.97081	0.238711
cluster7_orange_Cru	AT1G53490	Carubv10010926	CARHR043720	Thhalv10011691	-0.550505	-0.0335368	0.177053	-0.643727	-0.16306	-0.528402	1.82228	-0.359913	-0.56267
cluster7_orange_Cru	AT1G54740	Carubv10020764	CARHR055880	Thhalv10023602	-0.0566489	-0.409031	-0.179257	-0.0794545	0.557546	-0.21786	1.57761	0.362984	-0.53892
cluster7_orange_Cru	AT1G54790	Carubv10020463	CARHR055920	Thhalv10023524	1.13794	0.372035	0.210042	0.237016	0.702105	0.371965	2.21902	-0.111908	-1.18881
cluster7_orange_Cru	AT1G56010	Carubv10011081	CARHR045740	Thhalv10011659	-0.373492	-0.597002	-0.071545	-0.475602	-0.104837	-0.354078	1.03324	0.488754	0.442526
cluster7_orange_Cru	AT1G56320	Carubv10021493	CARHR289860	Thhalv10023988	-0.598804	0.388853	0.495449	0.0862174	0.26025	1.15599	1.75836	0.626534	0.163104
cluster7_orange_Cru	AT1G58220	Carubv10019784	CARHR053790	Thhalv10024079	0.239323	0.559567	-0.317673	-0.493114	-1.024	-0.187193	0.260337	-0.0810587	0.47836
cluster7_orange_Cru	AT1G58370	Carubv10019737	CARHR284140	Thhalv10023244	1.16546	0.553386	-0.0359246	0.0571726	0.293575	0.0701087	0.882191	0.174702	0.318899
cluster7_orange_Cru	AT1G59660	Carubv10021751	CARHR053550	Thhalv10023238	0.0661316	1.13188	0.170566	-0.413761	0.00702578	0.0034243	0.792778	-0.201282	-0.424526
cluster7_orange_Cru	AT1G60620	Carubv10004883	CARHR052350	Thhalv10025407	-0.30859	-0.258613	-0.438886	-0.593044	-0.62927	-0.610012	3.23177	-0.446837	-0.533628
cluster7_orange_Cru	AT1G61180	Carubv10019775	CARHR051470	Thhalv10023248	0.271553	1.19884	-0.480409	-0.198181	-0.586282	-0.565953	2.77356	-0.815746	0.430342
cluster7_orange_Cru	AT1G61620	Carubv10020693	CARHR050750	Thhalv10023604	-0.0333291	0.259285	0.169174	0.175338	0.14269	0.141986	1.73575	-0.0554331	0.0640173
cluster7_orange_Cru	AT1G62290	Carubv10021675	CARHR049830	Thhalv10023414	0.209567	0.0494536	-0.146218	-0.131382	-0.150073	-0.58711	1.16556	-0.0641155	-0.0765617
cluster7_orange_Cru	AT1G62320	Carubv10019839	CARHR049750	Thhalv10023297	0.802003	0.85328	-0.238002	-0.426141	0.355618	-0.206749	1.55624	0.907133	0.813329
cluster7_orange_Cru	AT1G62790	Carubv10021100	CARHR049050	Thhalv10023739	-0.369242	-0.171971	0.176611	0.408046	0.106038	0.500895	1.65592	0.343285	1.1014
cluster7_orange_Cru	AT1G64890	Carubv10020304	CARHR034490	Thhalv10018559	-0.24719	-0.0557219	-0.136963	0.0350843	-0.00735005	0.0309351	1.12236	-0.178377	-0.46626
cluster7_orange_Cru	AT1G67110	Carubv10020158	CARHR059560	Thhalv10018406	-0.145383	0.47295	0.635778	-0.0352683	0.484141	0.737711	1.47238	-0.22305	0.598964
cluster7_orange_Cru	AT1G68470	Carubv10020285	CARHR061250	Thhalv10018517	0.211741	0.0391117	-0.118005	0.0970336	0.0192138	0.400931	1.43466	0.0554534	-0.515733
cluster7_orange_Cru	AT1G69450	Carubv10019875	CARHR062380	Thhalv10018196	0.605146	-0.0823802	0.131019	0.0319425	0.400918	-0.139668	1.19823	0.797836	0.575524
cluster7_orange_Cru	AT1G69830	Carubv10019759	CARHR062910	Thhalv10018099	0.417679	0.381537	-0.116273	-0.388858	-0.148244	-0.37572	1.25627	-0.220701	-0.25485
cluster7_orange_Cru	AT1G70460	Carubv10021266	CARHR063620	Thhalv10018193	0.896369	0.0980259	-0.258034	-0.313498	-0.350648	-0.159024	2.11593	1.49945	0.185139
cluster7_orange_Cru	AT1G70630	Carubv10019952	CARHR063860	Thhalv10018343	0.169092	-0.420416	-0.564038	-0.658142	-0.322027	-0.945412	3.8528	0.931104	-0.0310787
cluster7_orange_Cru	AT1G71880	Carubv10020153	CARHR064690	Thhalv10018412	1.28162	-0.64599	0.679073	0.260491	0.0663634	0.853115	1.20865	-0.910467	0.323164
cluster7_orange_Cru	AT1G71960	Carubv10022459	CARHR064780	Thhalv10018591	0.096525	0.624853	-0.0495093	0.20058	0.0687707	0.489907	1.52503	-0.148579	-0.149049
cluster7_orange_Cru	AT1G72100	Carubv10020268	CARHR064910	Thhalv10018523	-3.33092	-0.0570703	-0.617454	-1.63768	0.607004	-0.330074	2.58714	-0.379663	-0.150109
cluster7_orange_Cru	AT1G72240	Carubv10021011	CARHR065100	Thhalv10019488	1.4562	-0.56148	0.510602	0.541823	-0.126169	0.531346	1.98813	-1.27593	-0.749133
cluster7_orange_Cru	AT1G72416	Carubv10021087	CARHR065310	Thhalv10019284	0.846257	-0.591837	0.831404	0.0959681	-0.432732	1.39562	1.16107	-0.0181671	0.520643
cluster7_orange_Cru	AT1G73040	Carubv10021789	CARHR066010	Thhalv10019210	1.20214	-0.0136648	-0.0798177	-0.0461538	0.389424	0.684832	1.51949	0.998296	-0.148786
cluster7_orange_Cru	AT1G74660	Carubv10021199	CARHR067950	Thhalv10019368	-0.194022	-0.320496	0.0729011	0.378179	0.231606	0.329427	1.14664	0.95393	-0.0706031
cluster7_orange_Cru	AT1G74870	Carubv10020696	CARHR068190	Thhalv10018832	-0.631978	-0.570892	-0.0641046	-0.214113	0.120622	-0.197187	2.49018	-0.0232157	-0.253053
cluster7_orange_Cru	AT1G76490	Carubv10020027	CARHR070040	Thhalv10018320	-0.213194	-0.373723	-0.468352	-0.0492656	-0.374331	-0.604237	1.01017	-0.176615	0.176673
cluster7_orange_Cru	AT1G76790	Carubv10022155	CARHR070320	Thhalv10018739	-0.0390022	0.111542	-0.118721	-0.0319312	-0.300618	-0.169139	3.27262	-1.2383	2.17281
cluster7_orange_Cru	AT1G77145	Carubv10020822	CARHR070640	Thhalv10019841	0.24039	0.682366	-0.0990246	0.58964	0.728544	-0.283219	1.96585	0.495365	0.27337
cluster7_orange_Cru	AT1G77240	Carubv10021416	CARHR070710	Thhalv10018371	0.898507	0.0120246	0.187769	0.82917	0.79808	-2.92627	0.857556	0.717138	0.0521609
cluster7_orange_Cru	AT1G77450	Carubv10020834	CARHR070970	Thhalv10018998	0.393366	-0.0417053	0.648342	0.454147	0.445241	0.157953	2.85655	0.581355	-0.409261
cluster7_orange_Cru	AT1G77765	Carubv10021563	CARHR071280	Thhalv10019253	-0.161081	-0.3031	0.679751	-0.173071	-0.00531995	-0.175289	2.02824	0.26407	0.274185
cluster7_orange_Cru	AT1G78570	Carubv10022384	CARHR072060	Thhalv10018232	0.652781	0.28032	-0.132325	-0.167297	0.04898	-0.234435	1.36204	0.191351	0.758216
cluster7_orange_Cru	AT1G78910	Carubv10022381	CARHR072500	Thhalv10018480	-0.257411	0.0227886	0.193401	-0.32445	-0.321942	-0.443796	1.40484	-0.344829	-0.183806
cluster7_orange_Cru	AT1G78990	Carubv10022178	CARHR072650	Thhalv10018518	0.177316	-0.367949	0.11111	0.0993635	0.619326	0.151655	2.30145	0.654277	0.220739
cluster7_orange_Cru	AT1G79440	Carubv10020135	CARHR073100	Thhalv10018394	0.503187	0.549401	0.702346	0.189588	0.781389	0.65194	2.56894	-0.249005	0.120386
cluster7_orange_Cru	AT1G79640	Carubv10019901	CARHR073370	Thhalv10018218	0.530706	0.251347	-0.268554	-1.203	-0.135182	-0.993736	1.29547	-0.0605825	0.689238
cluster7_orange_Cru	AT1G79650	Carubv10020503	CARHR073380	Thhalv10018655	-0.0749688	0.180538	0.235063	0.20808	0.149692	0.388797	1.13911	-0.102906	-0.126391
cluster7_orange_Cru	AT1G79660	Carubv10021275	CARHR073400	Thhalv10019378	-0.154857	-0.325938	0.269263	0.576218	-0.221249	0.246046	1.06887	0.811603	0.761531
cluster7_orange_Cru	AT1G80320	Carubv10022458	CARHR074190	Thhalv10018872	0.138479	-0.0488633	0.82136	-0.031279	0.811786	0.4309	2.39045	-0.0869276	-0.111995
cluster7_orange_Cru	AT2G01390	Carubv10018804	CARHR143900	Thhalv10000833	0.461501	0.0724607	-1.2138	-0.824832	0.470401	-2.30149	1.24349	-0.0173415	-0.537104
cluster7_orange_Cru	AT2G01410	Carubv10018601	CARHR143920	Thhalv10001208	0.308323	-0.236129	0.241125	0.704833	0.113389	0.436689	1.00844	-0.366567	0.328891
cluster7_orange_Cru	AT2G02450	Carubv10017334	CARHR145000	Thhalv10004330	0.20749	0.0936119	-0.26037	-0.351763	-0.600425	-0.163925	1.01112	0.0704873	-0.138612
cluster7_orange_Cru	AT2G03260	Carubv10016880	CARHR145590	Thhalv10003663	1.0623	-0.304682	0.593475	-0.285479	-0.0623363	-0.817652	1.50364	0.96002	0.0487917
cluster7_orange_Cru	AT2G03450	Carubv10016817	CARHR145810	Thhalv10003799	0.535692	0.513387	-0.0224146	0.00608907	-0.197833	-0.0730096	1.00771	0.481849	0.818709
cluster7_orange_Cru	AT2G03500	Carubv10017308	CARHR145840	Thhalv10004257	0.556679	0.324067	0.670999	0.48431	0.303715	0.777622	1.14312	0.392392	-0.248891
cluster7_orange_Cru	AT2G03730	Carubv10017215	CARHR146120	Thhalv10004191	-0.243952	-0.260988	-0.296159	-0.642266	-0.284229	-0.679828	1.09699	0.163791	0.778369
cluster7_orange_Cru	AT2G14620	Carubv10014279	CARHR105200	Thhalv10022791	0.392361	-0.252465	0.263979	-0.0736982	1.54513	0.0540772	0.728144	-0.144601	0.0920384
cluster7_orange_Cru	AT2G14820	Carubv10013204	CARHR284790	Thhalv10023006	0.0277562	0.530558	0.046435	0.117575	-0.474957	0.00387913	1.60653	0.258628	-0.753964
cluster7_orange_Cru	AT2G15730	Carubv10014100	CARHR106080	Thhalv10022768	-0.0620443	0.0208372	0.401566	-0.126647	0.336521	0.127244	1.59512	0.790028	0.339075
cluster7_orange_Cru	AT2G16430	Carubv10013635	CARHR106670	Thhalv10022673	0.418282	-0.0667056	-0.0855802	0.170049	-0.0826155	0.0947097	1.68208	0.363738	0.843064
cluster7_orange_Cru	AT2G16660	Carubv10013397	CARHR287470	Thhalv10022630	1.34219	0.579072	0.151304	-0.0835132	-0.0277503	0.392622	2.77056	-0.749269	0.400746
cluster7_orange_Cru	AT2G16890	Carubv10016193	CARHR107160	Thhalv10022679	0.103928	0.798063	0.295061	0.477405	-0.0406657	0.50482	1.30315	-1.17119	0.0868613
cluster7_orange_Cru	AT2G17150	Carubv10012927	CARHR293470	Thhalv10022536	-0.175218	0.370258	-0.643991	-0.688744	-0.517525	-0.505888	1.28743	0.679342	-0.137651
cluster7_orange_Cru	AT2G17300	Carubv10016304	CARHR107410	Thhalv10023149	-0.96802	-1.30143	-0.920623	-0.810956	-1.24655	-0.965955	2.14027	2.09084	1.09642
cluster7_orange_Cru	AT2G17370	Carubv10013360	CARHR107530	Thhalv10022614	0.164873	0.194933	0.0400079	-0.00397027	-0.155147	-0.243549	1.2479	-0.296443	-0.853415
cluster7_orange_Cru	AT2G17710	Carubv10016361	CARHR108000	Thhalv10022897	0.436932	0.653793	0.449281	0.348934	0.525727	0.228024	2.73852	-0.482365	1.4334
cluster7_orange_Cru	AT2G17787	Carubv10014159	CARHR108180	Thhalv10022767	-0.114178	0.165822	-0.0829394	0.134943	0.362705	-0.0395343	1.50353	1.20207	1.07418
cluster7_orange_Cru	AT2G20420	Carubv10013793	CARHR110970	Thhalv10001996	0.129329	0.390893	0.104433	0.0734278	0.225465	0.0330132	1.67495	0.249562	-0.0420966
cluster7_orange_Cru	AT2G20540	Carubv10015651	CARHR111120	Thhalv10001958	0.523415	-0.193607	-0.492142	-0.158808	-0.808696	-0.626753	1.20747	-0.205627	-0.0807685
cluster7_orange_Cru	AT2G20650	Carubv10013368	CARHR111300	Thhalv10002192	-0.112867	-0.511928	-0.318373	-0.11182	-0.363462	-1.11635	1.12372	-0.177861	0.32134
cluster7_orange_Cru	AT2G20720	Carubv10013598	CARHR111360	Thhalv10001973	0.689833	0.637487	0.279151	-0.255204	0.145071	-0.221816	3.46456	0.376226	-0.430948
cluster7_orange_Cru	AT2G20920	Carubv10023781	CARHR111820	Thhalv10000275	-0.0183055	0.108066	0.186093	0.367439	0.0712976	0.38266	1.77317	0.731792	0.835818
cluster7_orange_Cru	AT2G21540	Carubv10025149	CARHR112480	Thhalv10000115	0.0243145	0.228528	-0.582999	-0.162915	0.252618	-0.596078	1.01248	0.108967	0.234033
cluster7_orange_Cru	AT2G22330	Carubv10025388	CARHR113560	Thhalv10000114	0.150569	0.0597911	0.315557	0.0967932	0.551791	0.0525907	1.91736	0.338745	0.238538
cluster7_orange_Cru	AT2G22620	Carubv10022775	CARHR113840	Thhalv10000697	-0.399465	-0.157264	-0.295787	-0.40378	0.0520945	-0.804604	1.31357	1.05331	0.350895
cluster7_orange_Cru	AT2G23980	Carubv10022706	CARHR184680	Thhalv10000059	0.590117	0.299139	0.295484	0.0540936	0.633689	0.142554	1.47652	0.351192	0.809591
cluster7_orange_Cru	AT2G25200	Carubv10023518	CARHR116430	Thhalv10000227	-0.468952	0.0600805	-0.0286828	0.463318	-0.148499	-0.533374	2.29523	0.549276	0.502669
cluster7_orange_Cru	AT2G25290	Carubv10022695	CARHR116250	Thhalv10000057	0.364885	0.869392	0.0681358	-0.393205	1.19233	0.4207	2.21896	0.126452	0.266777
cluster7_orange_Cru	AT2G25625	Carubv10024259	CARHR115660	Thhalv10000347	-0.882475	-0.0394681	-0.0986458	0.171888	-0.692628	-0.606528	1.54334	-0.239614	0.125869
cluster7_orange_Cru	AT2G26810	Carubv10024142	CARHR118990	Thhalv10002083	-0.705915	-0.498074	-0.132036	-0.222092	-0.20159	-0.431977	2.39647	-0.470923	-0.326706
cluster7_orange_Cru	AT2G27180	Carubv10024215	CARHR119660	Thhalv10002111	0.607357	-0.418043	-0.599043	-0.306439	0.300477	-0.278793	2.11153	1.39686	-0.176735
cluster7_orange_Cru	AT2G27420	Carubv10023540	CARHR120010	Thhalv10002030	-1.20612	-3.8927	-0.325457	-0.0790996	-0.342995	-0.196347	2.46244	-0.0670856	-0.55799
cluster7_orange_Cru	AT2G27430	Carubv10023222	CARHR120020	Thhalv10001989	-0.258247	-0.167907	-0.48854	-0.592376	-0.666286	0.23635	2.53589	-0.611908	-0.704477
cluster7_orange_Cru	AT2G28340	Carubv10023774	CARHR121270	Thhalv10017012	-0.863239	0.140512	-0.3364	1.0806	0.348197	-0.0592245	0.849139	-0.510004	-0.311055
cluster7_orange_Cru	AT2G28590	Carubv10023147	CARHR121610	Thhalv10016694	-0.106464	0.593191	0.341679	0.417384	0.646893	0.713973	1.94468	-0.0797253	0.146755
cluster7_orange_Cru	AT2G28760	Carubv10023520	CARHR121890	Thhalv10016891	0.544643	0.119789	0.460296	0.194184	0.761345	0.486131	1.47482	0.497955	0.108131
cluster7_orange_Cru	AT2G29490	Carubv10023969	CARHR122810	Thhalv10017660	0.305063	-0.0914569	0.611364	-0.0284174	0.337537	0.58686	1.09818	0.261077	-0.197261
cluster7_orange_Cru	AT2G30000	Carubv10010703	CARHR006880	Thhalv10017457	-0.367993	0.0023844	0.0951814	0.246715	0.235615	0.259831	1.3293	-0.173898	-0.17905
cluster7_orange_Cru	AT2G31210	Carubv10023260	CARHR124810	Thhalv10017830	0.957283	-0.0570703	-0.431717	-0.378539	-1.13131	0.207642	4.54935	-0.0173415	-0.445521
cluster7_orange_Cru	AT2G31510	Carubv10012456	CARHR125160	Thhalv10016456	-0.162106	0.11462	-0.53644	-0.597863	-0.611312	-0.531377	1.24624	-0.0560802	-0.198944
cluster7_orange_Cru	AT2G31940	Carubv10024302	CARHR125650	Thhalv10017436	-0.408046	-0.726529	0.47279	0.429469	0.759283	0.280016	3.27786	-0.172659	0.438625
cluster7_orange_Cru	AT2G32840	Carubv10023571	CARHR126790	Thhalv10016920	-0.226914	-0.13853	-0.180593	-0.391467	-0.374854	-0.126452	1.67616	0.781073	1.04666
cluster7_orange_Cru	AT2G33460	Carubv10025564	CARHR127470	Thhalv10017223	-0.842315	0.366096	-0.655538	0.676408	0.718232	0.922799	2.13264	-0.139236	0.508733
cluster7_orange_Cru	AT2G34770	Carubv10023963	CARHR128930	Thhalv10017638	-0.428083	0.0886857	-0.136371	-0.128181	-0.262445	-0.0313293	1.69419	0.0686983	0.399129
cluster7_orange_Cru	AT2G36380	Carubv10025439	CARHR130680	Thhalv10016140	0.410943	0.310341	-0.177495	-0.355408	-0.419004	-0.479474	1.25112	1.09756	-0.00413105
cluster7_orange_Cru	AT2G36630	Carubv10023149	CARHR130910	Thhalv10016620	1.10053	0.126991	0.408232	0.582417	0.455379	0.480421	2.00765	0.787006	-0.26048
cluster7_orange_Cru	AT2G36840	Carubv10023321	CARHR131300	Thhalv10016601	-0.514142	0.242658	-0.227232	0.0628813	0.147704	-0.711533	1.73175	0.767728	0.41416
cluster7_orange_Cru	AT2G37280	Carubv10022507	CARHR132310	Thhalv10016141	0.714834	0.599366	-0.269926	-0.346549	-0.544797	0.534104	2.25287	-0.689319	0.295153
cluster7_orange_Cru	AT2G37470	Carubv10018224	CARHR163570	Thhalv10010811	-0.282104	-0.346899	0.111606	0.32105	0.0997757	0.212647	1.51709	0.214889	-0.325598
cluster7_orange_Cru	AT2G37480	Carubv10023934	CARHR132130	Thhalv10017918	-0.0509235	-0.0578883	0.432595	0.312789	0.348197	0.469096	1.55347	-0.0173415	0.557088
cluster7_orange_Cru	AT2G37540	Carubv10023534	CARHR132070	Thhalv10016943	0.855756	0.404082	0.471194	0.510821	0.720728	0.288717	1.57176	0.228989	-0.207091
cluster7_orange_Cru	AT2G38310	Carubv10025307	CARHR132900	Thhalv10017727	0.282097	-0.357342	0.0187458	0.0882375	-0.540503	0.206926	1.19111	0.457637	-0.159782
cluster7_orange_Cru	AT2G38400	Carubv10023117	CARHR133020	Thhalv10016589	-0.00126052	0.340613	0.290056	0.18005	0.28044	-0.250078	1.39128	-0.00876734	-0.415219
cluster7_orange_Cru	AT2G39110	Carubv10024803	CARHR133880	Thhalv10016674	0.615251	0.288488	0.0536456	-0.774124	0.343573	-0.256839	2.05006	0.354774	0.394432
cluster7_orange_Cru	AT2G40250	Carubv10025096	CARHR135290	Thhalv10017802	-0.480692	-0.859112	-1.43589	0.84111	0.705663	0.736052	0.77672	0.168571	-1.56687
cluster7_orange_Cru	AT2G41830	Carubv10022560	CARHR136910	Thhalv10016171	0.776041	0.468842	-0.158733	-0.197551	0.364527	-0.121073	2.05541	0.794769	0.690532
cluster7_orange_Cru	AT2G42580	Carubv10024930	CARHR137720	Thhalv10016343	-0.209964	0.0633742	-0.309959	-0.415432	-0.669805	-0.570633	1.09123	0.104763	-0.259179
cluster7_orange_Cru	AT2G44110	Carubv10025059	CARHR139280	Thhalv10001415	-0.268714	-0.0899652	-0.481842	0.566635	-1.08015	-1.09121	0.98429	0.0837456	1.11082
cluster7_orange_Cru	AT2G44350	Carubv10022842	CARHR139510	Thhalv10001384	0.485593	0.311906	0.187481	0.117959	0.238689	0.244516	1.2033	0.284599	0.488772
cluster7_orange_Cru	AT2G44450	Carubv10023032	CARHR139610	Thhalv10001416	0.330623	0.258629	0.104828	0.101506	0.308031	0.10058	1.73009	1.07448	1.04734
cluster7_orange_Cru	AT2G45510	Carubv10023415	CARHR140700	Thhalv10001408	-0.19876	0.325862	0.121523	-0.289055	-0.0245445	-0.891541	1.26184	0.658317	0.264809
cluster7_orange_Cru	AT2G46380	Carubv10024953	CARHR141660	Thhalv10001333	0.285223	0.380683	-0.427687	0.0752468	-0.667744	-1.30207	1.29754	-0.198215	0.617107
cluster7_orange_Cru	AT2G46720	Carubv10025132	CARHR142090	Thhalv10001434	0.761687	-0.434001	0.118518	0.477553	0.332206	0.193839	1.05378	-0.0173415	-0.443477
cluster7_orange_Cru	AT2G47670	Carubv10024078	CARHR143060	Thhalv10001636	2.05618	-0.511188	0.130909	-0.172951	-0.250201	0.666901	1.03578	-3.31742	0.359002
cluster7_orange_Cru	AT3G01190	Carubv10016167	CARHR075850	Thhalv10021152	-0.178538	-0.0979574	0.199276	0.646606	0.135393	0.17813	1.51363	-0.735001	-0.430938
cluster7_orange_Cru	AT3G01200	Carubv10013964	CARHR075840	Thhalv10020923	-0.16954	-0.269703	-0.0546186	-0.159161	-0.162896	-0.26531	1.34935	-0.213779	0.061482
cluster7_orange_Cru	AT3G01960	Carubv10014878	CARHR075000	Thhalv10021987	-0.0308474	-0.61733	-0.797974	-0.353665	0.186931	0.221023	1.37673	0.160259	0.217683
cluster7_orange_Cru	AT3G02470	Carubv10015160	CARHR076450	Thhalv10022357	3.10752	-0.831603	-1.09183	-0.633167	-0.180124	-0.320679	0.283648	-0.0173415	0.328436
cluster7_orange_Cru	AT3G03330	Carubv10014155	CARHR077370	Thhalv10021121	-0.264354	0.389967	0.0129821	-0.212186	-0.0263201	-0.615231	1.22573	-0.540024	-0.0621459
cluster7_orange_Cru	AT3G03700	Carubv10013574	CARHR077760	Thhalv10020627	0.39752	0.965474	0.731683	0.954	0.260125	-2.0978	1.54738	0.403082	0.618392
cluster7_orange_Cru	AT3G04720	Carubv10014707	CARHR078970	Thhalv10021503	0.346533	-0.321521	0.0863347	0.404674	0.325913	0.420391	3.21746	0.00444853	-0.0713521
cluster7_orange_Cru	AT3G05040	Carubv10016153	CARHR079360	Thhalv10022131	0.198274	0.0244303	0.00285873	-0.636997	-0.557187	-0.344452	1.07731	-0.28876	-0.060534
cluster7_orange_Cru	AT3G05230	Carubv10014790	CARHR079570	Thhalv10021665	-0.0707076	-0.0666646	0.297687	0.360293	0.153104	0.372568	1.04013	0.000582	0.0115672
cluster7_orange_Cru	AT3G07525	Carubv10016257	CARHR082180	Thhalv10022158	-0.419291	-1.00745	-0.0569671	-0.0486991	-0.256377	-0.728738	0.688734	0.118745	-0.26428
cluster7_orange_Cru	AT3G09810	Carubv10013785	CARHR084260	Thhalv10020958	0.219758	0.189055	0.19245	0.40939	0.249539	0.237318	1.6651	0.269063	0.673774
cluster7_orange_Cru	AT3G10260	Carubv10014488	CARHR084740	Thhalv10021400	0.022067	-0.131147	0.320727	0.2077	0.427721	0.25791	1.83748	-0.218288	-0.00115765
cluster7_orange_Cru	AT3G10320	Carubv10015940	CARHR084800	Thhalv10020581	0.0906373	0.302652	-0.203696	-1.09753	0.141615	-0.361072	2.4197	2.05963	0.2661
cluster7_orange_Cru	AT3G10420	Carubv10015636	CARHR084910	Thhalv10020197	0.2076	0.306816	-0.120617	-0.35883	0.315337	-0.351001	1.17922	0.316051	0.196204
cluster7_orange_Cru	AT3G10630	Carubv10015910	CARHR085210	Thhalv10020598	-0.479824	-0.122095	-0.357238	-0.312057	-0.474434	-1.02254	1.34314	0.378554	-0.352657
cluster7_orange_Cru	AT3G11030	Carubv10013691	CARHR085610	Thhalv10022294	0.0335569	0.0786145	0.201969	0.565491	0.101033	0.425554	1.56979	0.39757	0.492073
cluster7_orange_Cru	AT3G11580	Carubv10014376	CARHR086130	Thhalv10021305	0.0995211	-0.173903	0.663232	0.639537	-0.32787	0.741032	1.81235	0.0721077	1.17366
cluster7_orange_Cru	AT3G12730	Carubv10014526	CARHR087250	Thhalv10021440	0.067605	0.101933	0.195683	0.38797	0.327699	0.579985	1.03595	0.460647	0.102523
cluster7_orange_Cru	AT3G13420	Carubv10014412	CARHR088030	Thhalv10021458	-0.504342	-0.0954289	-0.159644	-0.373694	-0.226198	-0.323466	1.86038	0.508433	-0.15955
cluster7_orange_Cru	AT3G13780	Carubv10014249	CARHR088510	Thhalv10021210	-0.419832	0.270956	0.221898	0.0443177	0.178961	-0.0732792	1.44494	0.306808	0.000777
cluster7_orange_Cru	AT3G13870	Carubv10015073	CARHR088660	Thhalv10020092	0.365312	0.439891	-0.0795112	-0.0790743	-0.31257	0.139359	2.02621	0.210964	0.374103
cluster7_orange_Cru	AT3G13900	Carubv10012832	CARHR088710	Thhalv10019918	0.974629	-0.12775	0.688667	-0.215532	0.0877336	0.817967	1.19691	-0.0110113	-0.38086
cluster7_orange_Cru	AT3G15620	Carubv10015516	CARHR090710	Thhalv10020425	-0.18752	0.783475	0.146269	-0.287647	1.11868	-0.0334451	1.03056	0.0855135	0.0506263
cluster7_orange_Cru	AT3G16280	Carubv10014506	CARHR091490	Thhalv10022278	0.0213848	1.0546	-0.431924	0.669935	0.822621	0.537731	1.72987	-0.219997	-1.02676
cluster7_orange_Cru	AT3G16340	Carubv10012817	CARHR091550	Thhalv10019897	0.451552	0.515075	0.107317	-0.453996	-0.665841	0.170509	1.00083	0.175452	0.327214
cluster7_orange_Cru	AT3G16700	Carubv10014572	CARHR091950	Thhalv10021471	-0.344475	0.411593	0.588851	-0.371672	-0.126379	0.31327	1.92639	-0.351914	0.746561
cluster7_orange_Cru	AT3G16910	Carubv10013340	CARHR092190	Thhalv10020385	0.492652	0.266683	0.451365	0.134973	0.779757	0.462654	1.37337	-0.269753	0.287613
cluster7_orange_Cru	AT3G17205	Carubv10012881	CARHR092470	Thhalv10019984	0.605125	0.689209	-0.0156706	-0.288782	0.102854	0.297164	1.05087	0.228744	0.100551
cluster7_orange_Cru	AT3G17580	Carubv10015025	CARHR092890	Thhalv10022414	-1.03578	-1.10431	0.0935964	0.0511939	-0.0369854	-0.546511	2.2123	0.316364	-0.318603
cluster7_orange_Cru	AT3G18200	Carubv10015443	CARHR093530	Thhalv10021001	0.10912	0.307496	0.488761	0.401691	0.371915	0.661863	1.30581	0.258203	-0.556982
cluster7_orange_Cru	AT3G19050	Carubv10012792	CARHR094490	Thhalv10019870	0.739569	0.864073	-0.10696	-0.161357	-0.0810268	0.441685	1.47367	-0.296055	-0.000227
cluster7_orange_Cru	AT3G19330	Carubv10016263	CARHR074890	Thhalv10021033	-0.319935	-0.306074	-0.0992435	0.161135	0.118804	-0.216267	1.85529	-0.130214	0.0932675
cluster7_orange_Cru	AT3G20170	Carubv10013599	CARHR095760	Thhalv10020642	0.358167	0.320634	0.355656	0.338224	0.586733	0.500495	1.51	-0.0911332	0.519082
cluster7_orange_Cru	AT3G20475	Carubv10015967	CARHR096230	Thhalv10022259	-0.258552	0.057616	-0.640791	-0.469234	0.226584	-1.45551	1.59686	0.697435	-0.64436
cluster7_orange_Cru	AT3G20570	Carubv10014654	CARHR096360	Thhalv10021550	0.193866	0.171193	0.165669	0.321384	0.247662	0.18737	1.09747	0.311434	0.388922
cluster7_orange_Cru	AT3G21160	Carubv10013330	CARHR097020	Thhalv10020383	0.287231	0.116975	0.306441	0.130482	0.148522	-0.032398	1.82165	0.683247	0.286505
cluster7_orange_Cru	AT3G21340	Carubv10016135	CARHR097260	Thhalv10020016	0.23979	-0.163923	-0.958445	-0.188207	-0.605723	0.6116	1.43059	1.33589	-0.356215
cluster7_orange_Cru	AT3G21600	Carubv10013957	CARHR097570	Thhalv10020930	-0.0425536	0.505053	-0.125027	-0.438449	0.148069	-0.329677	1.47877	-0.0475121	0.224985
cluster7_orange_Cru	AT3G21640	Carubv10014006	CARHR161760	Thhalv10010511	-0.0774562	0.839266	0.374481	-0.109479	0.467646	0.096585	1.6973	-0.740835	-0.253468
cluster7_orange_Cru	AT3G22750	Carubv10014341	CARHR098600	Thhalv10020938	0.0958661	0.03613	-0.176448	0.172295	-0.124304	0.485507	2.42657	0.994059	-0.269953
cluster7_orange_Cru	AT3G23160	Carubv10013433	CARHR099090	Thhalv10020490	0.0434144	-0.473735	-0.325177	-0.120207	-0.0205399	-0.555815	2.24738	0.571886	1.11293
cluster7_orange_Cru	AT3G23210	Carubv10014200	CARHR099160	Thhalv10021177	-0.584279	-0.663738	-0.229271	-0.977869	-0.268343	-0.615103	1.19408	0.544298	0.884805
cluster7_orange_Cru	AT3G23530	Carubv10012958	CARHR099430	Thhalv10020039	0.57011	0.685394	0.0553694	0.0503425	0.266448	0.166156	1.78443	0.866611	0.193797
cluster7_orange_Cru	AT3G23920	Carubv10013332	CARHR100350	Thhalv10002460	0.335228	0.489491	0.187698	0.391788	-0.115233	0.509054	2.11212	0.0632703	0.191821
cluster7_orange_Cru	AT3G24630	Carubv10013058	CARHR100960	Thhalv10002425	-0.167512	0.147073	-0.45012	-0.856695	-0.802206	-0.360272	1.44018	0.0895158	0.715984
cluster7_orange_Cru	AT3G25710	Carubv10017470	CARHR146640	Thhalv10004524	0.098948	-0.0542118	-0.124806	-0.12737	-0.844274	-0.357725	1.03319	0.199046	-0.676628
cluster7_orange_Cru	AT3G25740	Carubv10019207	CARHR146660	Thhalv10004848	-0.0622476	-0.423658	-0.0943151	-0.513871	-0.137999	-0.44062	1.00105	-0.268635	0.0225673
cluster7_orange_Cru	AT3G25990	Carubv10017413	CARHR146980	Thhalv10004359	0.577896	1.88526	0.965288	0.247991	1.11929	-1.47374	1.13467	-0.430892	0.24764
cluster7_orange_Cru	AT3G26115	Carubv10018106	CARHR147120	Thhalv10004274	0.600503	0.58724	0.45812	-0.0162699	0.723642	0.756415	3.03938	0.129641	-0.383234
cluster7_orange_Cru	AT3G27900	Carubv10012390	CARHR292080	Thhalv10001856	-0.244077	-0.0578883	-0.891753	-1.09485	-0.888336	-0.583167	2.19478	-0.428444	0.338165
cluster7_orange_Cru	AT3G27930	Carubv10017321	CARHR149500	Thhalv10004293	-0.0848524	0.190942	-0.0450161	0.0641532	0.227774	0.334184	1.86195	0.574368	-0.191218
cluster7_orange_Cru	AT3G42640	Carubv10008027	CARHR153650	Thhalv10002391	-0.294081	0.114739	-0.840387	-1.12191	-0.75817	-1.09136	2.07078	0.229254	0.338165
cluster7_orange_Cru	AT3G45210	Carubv10018671	CARHR150750	Thhalv10002696	-0.48685	-1.02848	-0.778463	-0.524731	-0.909886	-0.611565	1.17495	0.390381	-0.148615
cluster7_orange_Cru	AT3G46640	Carubv10017603	CARHR155170	Thhalv10002605	0.456265	-0.0740109	0.232553	0.285473	0.186119	0.18913	1.59513	1.28855	0.505673
cluster7_orange_Cru	AT3G47530	Carubv10019129	CARHR156170	Thhalv10010230	0.0225032	0.0825967	0.0249254	-0.482905	0.0845447	-0.424868	2.34101	-0.2214	0.130924
cluster7_orange_Cru	AT3G48100	Carubv10018078	CARHR156830	Thhalv10010754	-0.280713	0.627575	0.0721755	0.268634	0.31318	0.604505	1.81505	0.702032	0.831293
cluster7_orange_Cru	AT3G48440	Carubv10017261	CARHR157200	Thhalv10010405	0.642546	0.217469	0.65311	-0.018547	0.364815	0.135727	1.52125	-0.0538702	-0.116971
cluster7_orange_Cru	AT3G48770	Carubv10019064	CARHR157530	Thhalv10010053	-0.103777	1.12015	0.119989	0.990427	-0.0735181	0.908462	1.70951	-0.401037	0.549454
cluster7_orange_Cru	AT3G48880	Carubv10017648	CARHR157690	Thhalv10010519	0.158862	0.492334	0.504883	0.266688	0.637021	0.0837829	1.294	0.350184	-0.135424
cluster7_orange_Cru	AT3G48900	Carubv10016884	CARHR157710	Thhalv10010222	-0.429993	0.380323	-0.547676	-0.932954	-0.363163	-0.399665	1.13298	-0.0950205	-0.285087
cluster7_orange_Cru	AT3G48990	Carubv10017034	CARHR157810	Thhalv10010297	0.0354244	-0.556785	-0.456084	-0.14068	-0.467852	-0.489501	1.17473	0.961436	0.568562
cluster7_orange_Cru	AT3G49750	Carubv10017786	CARHR158830	Thhalv10010947	-0.65855	-0.432378	-0.318473	-0.0498796	-0.715585	-0.36839	1.04039	-0.0173415	-0.863969
cluster7_orange_Cru	AT3G50920	Carubv10017980	CARHR160490	Thhalv10010693	-0.189047	0.0226714	0.277229	0.245693	0.18245	0.259702	1.60257	0.0149042	0.884269
cluster7_orange_Cru	AT3G51080	Carubv10017445	CARHR160660	Thhalv10010566	-0.680999	-0.91073	-0.547359	-0.134611	-0.969323	-0.166169	1.706	-0.969458	1.29446
cluster7_orange_Cru	AT3G51540	Carubv10017291	CARHR161110	Thhalv10010380	0.314824	-0.108949	-0.0863285	-0.391682	0.424363	0.78121	1.63572	0.851059	0.209933
cluster7_orange_Cru	AT3G51980	Carubv10017425	CARHR161640	Thhalv10010449	0.156338	-0.304414	-0.180807	0.0339204	-0.338922	-0.651899	1.37899	0.0659711	-0.0752657
cluster7_orange_Cru	AT3G52390	Carubv10017645	CARHR162160	Thhalv10010578	-0.152131	0.192604	-0.0306883	-0.0300022	0.27429	0.236448	1.90137	0.838053	0.552279
cluster7_orange_Cru	AT3G53170	Carubv10017083	CARHR163140	Thhalv10011131	0.162076	0.850461	0.142277	-0.0267049	1.10756	-0.20973	0.766396	-0.0919704	-0.363909
cluster7_orange_Cru	AT3G54270	Carubv10019050	CARHR164190	Thhalv10010402	-0.115213	0.284735	0.0917423	-0.0272359	0.415491	0.595975	1.14077	0.336261	0.398545
cluster7_orange_Cru	AT3G54650	Carubv10016893	CARHR164560	Thhalv10010227	0.129174	0.219737	0.0326553	0.142287	0.41716	0.227589	1.14851	0.373629	0.529619
cluster7_orange_Cru	AT3G55130	Carubv10018379	CARHR165160	Thhalv10010975	1.11763	0.279085	0.286507	0.247352	-0.09239	-0.291618	0.393701	-1.24385	-1.12447
cluster7_orange_Cru	AT3G56000	Carubv10019203	CARHR166080	Thhalv10005891	-0.387282	-0.430501	-0.480504	-0.345991	-0.233423	-1.17369	0.881193	0.180634	0.0943049
cluster7_orange_Cru	AT3G56350	Carubv10017945	CARHR166500	Thhalv10006477	0.293242	-0.223932	-1.10649	-0.827569	0.873519	0.469096	2.51955	1.27255	0.260872
cluster7_orange_Cru	AT3G56620	Carubv10017685	CARHR166730	Thhalv10006038	0.522618	0.415727	0.0734312	-0.244381	-1.24785	0.355059	0.605298	0.280725	-0.159578
cluster7_orange_Cru	AT3G57010	Carubv10017448	CARHR163700	Thhalv10006039	-0.173988	0.219365	0.0816652	0.165924	0.162612	0.0532097	1.89446	0.100512	-0.0530446
cluster7_orange_Cru	AT3G57540	Carubv10019640	CARHR167760	Thhalv10006130	-0.139739	0.267203	0.00795621	0.444401	0.420867	-0.320279	1.61348	-0.379825	0.0457207
cluster7_orange_Cru	AT3G59530	Carubv10017342	CARHR169910	Thhalv10006000	-0.0931119	0.411171	0.295879	-0.0451111	0.879719	-0.0708812	2.1086	0.216777	-0.0507734
cluster7_orange_Cru	AT3G60190	Carubv10019482	CARHR170510	Thhalv10005838	0.0418811	0.373252	-0.220683	-0.202607	0.182286	-0.038006	1.04971	0.468736	0.488909
cluster7_orange_Cru	AT3G60400	Carubv10018596	CARHR170720	Thhalv10005866	0.382124	0.52662	-0.172648	-0.354567	-0.0393238	-1.65609	0.334489	0.253027	-0.274608
cluster7_orange_Cru	AT3G61300	Carubv10018384	CARHR171610	Thhalv10005769	0.559166	0.805136	0.125505	0.152875	0.14204	0.571335	1.75423	0.896138	-0.308681
cluster7_orange_Cru	AT3G61630	Carubv10017705	CARHR171960	Thhalv10006118	-0.189112	-0.614009	-0.639727	0.260049	-0.199301	-0.306878	1.9439	0.291784	0.914017
cluster7_orange_Cru	AT3G62200	Carubv10016771	CARHR172540	Thhalv10005803	1.19153	1.08037	-0.151278	-0.415533	-0.243769	-0.364735	1.95266	0.00814369	0.715942
cluster7_orange_Cru	AT3G62420	Carubv10018852	CARHR172750	Thhalv10006418	-0.0509235	-0.0578883	0.432595	0.312789	0.348197	0.469096	1.16438	0.873793	0.524893
cluster7_orange_Cru	AT3G63400	Carubv10016960	CARHR291570	Thhalv10006033	0.173457	0.851877	0.540812	-0.00704938	0.404707	0.311592	1.2721	0.336008	0.133312
cluster7_orange_Cru	AT4G00200	Carubv10001535	CARHR248250	Thhalv10028822	-0.419585	0.0588316	0.0188622	0.138801	-0.00205784	0.0773327	1.65615	0.430984	0.195224
cluster7_orange_Cru	AT4G00700	Carubv10000130	CARHR248820	Thhalv10028388	0.0346971	0.503956	-0.263002	0.105008	-0.821614	-0.425748	1.39745	0.412025	-0.631005
cluster7_orange_Cru	AT4G05100	Carubv10001366	CARHR252460	Thhalv10029512	-0.426306	0.248061	-0.198257	0.292383	2.18207	-1.10609	1.98677	1.11974	0.816631
cluster7_orange_Cru	AT4G09150	Carubv10000219	CARHR260210	Thhalv10028375	0.589193	-0.235822	0.202819	0.258298	0.105448	0.595717	1.72454	0.264855	0.25588
cluster7_orange_Cru	AT4G10400	Carubv10001079	CARHR277260	Thhalv10019567	-0.684901	-1.00097	-0.968895	-0.50651	-1.1139	-0.501614	2.86128	0.49982	-0.389876
cluster7_orange_Cru	AT4G10960	Carubv10001297	CARHR255640	Thhalv10028777	-0.0509235	-0.0578883	0.432595	0.312789	0.348197	0.469096	1.87665	0.187044	0.0458516
cluster7_orange_Cru	AT4G11060	Carubv10001995	CARHR255550	Thhalv10028973	-0.0662444	-0.0821744	0.0354196	0.340451	0.278431	-0.0494844	1.36826	-0.330891	-0.301467
cluster7_orange_Cru	AT4G11490	Carubv10000439	CARHR254970	Thhalv10028513	0.710391	-1.12351	-0.876054	0.312789	1.0986	-0.0189046	2.9305	-0.33587	0.00719959
cluster7_orange_Cru	AT4G11660	Carubv10001204	CARHR254710	Thhalv10028744	0.0238945	-0.174517	0.205926	-0.148921	-0.440269	-0.159345	1.02518	0.524552	0.355989
cluster7_orange_Cru	AT4G11860	Carubv10000359	CARHR254440	Thhalv10028490	0.568153	0.508565	0.442303	0.183232	0.710644	0.0846033	1.00298	-0.0200867	0.270981
cluster7_orange_Cru	AT4G12080	Carubv10001268	CARHR254140	Thhalv10028768	-0.420261	-0.117637	-0.0544248	0.269097	-0.0299017	0.279851	1.08933	0.17915	-0.512798
cluster7_orange_Cru	AT4G12360	Carubv10003860	CARHR253880	Thhalv10029377	1.05343	0.470433	-0.173682	-0.215532	-0.21892	-0.294022	2.08263	1.02874	1.44317
cluster7_orange_Cru	AT4G12460	Carubv10000358	CARHR253740	Thhalv10028479	0.000431	0.128453	0.207803	-0.215859	-0.132735	-0.100241	1.02519	0.900561	-0.0129577
cluster7_orange_Cru	AT4G12570	Carubv10000186	CARHR253600	Thhalv10028412	0.544124	0.359247	0.318052	0.0527779	0.589003	-0.239016	2.21377	0.949566	0.71569
cluster7_orange_Cru	AT4G12740	Carubv10004796	CARHR218120	Thhalv10024575	-1.14999	-0.447673	-0.957922	-0.785665	-0.729785	-0.847961	1.74473	1.26879	0.204385
cluster7_orange_Cru	AT4G13350	Carubv10007750	CARHR218900	Thhalv10024713	0.225353	0.11993	0.00768231	-0.0536309	-0.175864	-0.0838681	1.55554	0.942334	0.579629
cluster7_orange_Cru	AT4G14290	Carubv10004497	CARHR220470	Thhalv10024836	-0.207075	-0.197003	-0.291979	-0.446038	-0.5178	-0.414443	2.14912	-0.123837	-0.11683
cluster7_orange_Cru	AT4G14410	Carubv10005335	CARHR220620	Thhalv10025927	0.514432	0.343108	0.468167	0.25151	0.740043	0.705009	1.9772	0.0302207	0.305744
cluster7_orange_Cru	AT4G14520	Carubv10005692	CARHR220740	Thhalv10015358	-0.879298	-0.851108	-0.300499	-0.514474	-0.543596	-0.722696	1.25395	0.46987	0.00622978
cluster7_orange_Cru	AT4G14780	Carubv10006325	CARHR221330	Thhalv10025537	-0.121789	0.121555	0.331569	-0.254113	-0.0228797	0.373589	1.59973	-0.240082	-0.573016
cluster7_orange_Cru	AT4G14940	Carubv10004333	CARHR221550	Thhalv10024636	0.791679	0.298787	-0.0923579	0.104134	-0.635402	0.267134	1.0805	0.704574	-0.0696704
cluster7_orange_Cru	AT4G15396	Carubv10004823	CARHR222080	Thhalv10025137	0.98667	0.797272	0.38281	-0.265735	0.628023	-0.547688	1.71036	-1.13434	-0.0442804
cluster7_orange_Cru	AT4G15410	Carubv10004870	CARHR222140	Thhalv10025275	0.0297106	0.209935	0.238819	0.0651716	0.25645	0.351553	1.15521	0.524464	0.255722
cluster7_orange_Cru	AT4G15740	Carubv10006571	CARHR290190	Thhalv10025151	1.79141	0.0365299	0.428382	0.482589	0.305769	0.0740545	1.23823	-0.380259	0.0234099
cluster7_orange_Cru	AT4G16280	Carubv10004227	CARHR222670	Thhalv10024390	-0.0222021	0.0178314	-0.0187252	-0.367253	-0.244048	-0.442856	1.23388	-0.351197	0.0822821
cluster7_orange_Cru	AT4G16440	Carubv10007204	CARHR222790	Thhalv10025117	0.197238	0.239709	-0.121137	0.0501851	-0.223722	-0.0430997	1.03891	0.472437	-0.314424
cluster7_orange_Cru	AT4G17030	Carubv10005585	CARHR223590	Thhalv10026076	0.507293	0.184845	-0.33624	0.582947	0.587847	0.123408	2.13741	0.578634	-0.450663
cluster7_orange_Cru	AT4G17440	Carubv10006806	CARHR224050	Thhalv10026175	-0.0155173	-0.110039	0.284967	0.0299039	0.410952	0.318077	2.89586	0.307578	0.576591
cluster7_orange_Cru	AT4G17460	Carubv10005434	CARHR224070	Thhalv10025921	-0.10249	-0.779711	0.0241571	-0.397519	-0.521406	-0.232738	1.22788	-0.234602	-0.962283
[truncated: 3,965 more rows]
