# Supplementary material for: Gene expression evolution in pattern-triggered immunity within Arabidopsis thaliana and across Brassicaceae species
Source: Plant Cell. 2021 Mar 5;33(6):1863–87. doi: 10.1093/plcell/koab073 (PMC8290292; doi:10.1093/plcell/koab073)
Supplement: koab073_Supplementary_Data [file koab073_supplementary_data.zip › tpc.00600.2020-s10.xlsx]

## Sheet: Supplemental Data Set 7
Supplemental Data. Winkelmüller, Entila, Anver et al. (2021). Gene expression evolution in pattern-triggered immunity within Arabidopsis thaliana and across Brassicaceae species. Plant Cell.
Supplemental Data Set 1. RNA-seq read counts for 1:1 orthologues in all the samples used in this study.
Arabidopsis_thaliana	Capsella_rubella	Cardamine_hirsuta	Eutrema_salsugineum	Ath_mock_1h_r1	Ath_flg22_1h_r1	Ath_mock_9h_r1	Ath_flg22_9h_r1	Ath_mock_24h_r1	Ath_flg22_24h_r1	Ath_mock_1h_r2	Ath_flg22_1h_r2	Ath_mock_9h_r2	Ath_flg22_9h_r2	Ath_mock_24h_r2	Ath_flg22_24h_r2	Ath_mock_1h_r3	Ath_flg22_1h_r3	Ath_mock_9h_r3	Ath_flg22_9h_r3	Ath_mock_24h_r3	Ath_flg22_24h_r3	Cru_mock_1h_r1	Cru_flg22_1h_r1	Cru_mock_9h_r1	Cru_flg22_9h_r1	Cru_mock_24h_r1	Cru_flg22_24h_r1	Cru_mock_1h_r2	Cru_flg22_1h_r2	Cru_mock_9h_r2	Cru_flg22_9h_r2	Cru_mock_24h_r2	Cru_flg22_24h_r2	Cru_mock_1h_r3	Cru_flg22_1h_r3	Cru_mock_9h_r3	Cru_flg22_9h_r3	Cru_mock_24h_r3	Cru_flg22_24h_r3	Chi_mock_1h_r1	Chi_flg22_1h_r1	Chi_mock_9h_r1	Chi_flg22_9h_r1	Chi_mock_24h_r1	Chi_flg22_24h_r1	Chi_mock_1h_r2	Chi_flg22_1h_r2	Chi_mock_9h_r2	Chi_flg22_9h_r2
AT1G01010	Carubv10009049	CARHR001500	Thhalv10007665	236	724	368	537	735	838	149	391	236	439	328	645	287	512	309	549	699	359	103	274	199	135	217	189	142	311	158	107	94	152	91	292	129	115	128	137	286	478	247	193	1133	1093	130	350	266	208
AT1G01020	Carubv10011984	CARHR001490	Thhalv10008618	1091	765	1212	943	1495	870	1420	1104	1097	1150	945	985	1413	743	850	686	1001	678	977	495	782	797	763	633	824	495	854	907	743	362	845	566	1118	1011	757	573	601	602	424	383	623	694	487	318	402	469
AT1G01030	Carubv10009540	CARHR001480	Thhalv10008068	181	241	198	132	336	205	283	177	134	146	284	224	225	244	159	138	277	145	261	252	73	190	386	522	122	205	132	170	261	279	192	254	173	218	269	365	251	481	180	321	582	897	192	367	181	286
AT1G01040	Carubv10008073	CARHR001460	Thhalv10006531	1371	1366	1624	1373	1540	1595	1054	788	1030	977	777	1450	1198	1378	1422	1663	2114	973	1625	711	380	1479	2335	1749	1228	647	1177	1443	1203	1150	1228	670	1610	1329	1599	1310	1028	874	1052	809	1739	2172	646	462	801	701
AT1G01050	Carubv10010288	CARHR001430	Thhalv10008767	1440	1399	2206	1492	2792	1633	1598	1430	2191	2204	1789	1814	1545	1275	1865	1534	1935	1493	2265	2538	2666	2159	2287	3000	3322	2873	2510	3250	2785	2355	2380	2341	2541	2866	2439	2323	3469	4282	3957	4689	3791	3832	3544	2513	3637	4455
AT1G01060	Carubv10008551	CARHR001420	Thhalv10007028	2256	2289	41	21	13762	12984	2086	1940	19	21	6575	7145	2157	2077	9	30	7605	5970	14044	8379	44	20	41381	31151	11191	7039	173	231	17442	12100	11273	8205	34	15	21347	14284	7571	7015	33	50	25409	18314	4766	3122	15	17
AT1G01070	Carubv10009303	CARHR001410	Thhalv10009501	191	107	111	112	201	135	150	62	120	179	115	228	167	98	65	107	161	118	0	0	0	0	0	0	0	0	4	1	0	0	0	0	0	0	0	0	7	5	27	15	37	15	7	0	7	22
AT1G01080	Carubv10009913	CARHR001380	Thhalv10008355	1763	1695	3026	1485	1915	1430	2065	1714	2976	1597	1220	1572	2279	1581	2347	1630	1513	1127	2076	1091	1930	1105	924	631	1422	1121	1675	1344	962	358	1546	1140	1966	1292	1287	671	1876	1762	2384	829	1373	597	2160	1127	1740	1021
AT1G01090	Carubv10009201	CARHR001370	Thhalv10007695	6648	6696	7832	4658	6976	3939	5625	5036	6366	4446	3857	4955	6802	7184	5255	5390	6023	3978	12710	9919	5791	9557	8126	6334	9916	8880	10366	9552	7391	4620	10083	9017	12429	11135	9238	6711	6167	7597	10195	6540	4811	4011	6333	3924	7124	5885
AT1G01110	Carubv10008796	CARHR001350	Thhalv10007299	168	101	132	51	128	54	177	78	128	133	82	118	134	127	78	52	76	63	141	118	45	96	148	52	130	168	86	60	103	43	81	175	115	80	93	49	287	329	319	258	273	188	218	136	228	197
AT1G01120	Carubv10012263	CARHR001340	Thhalv10007351	1254	4018	1027	733	1602	1885	821	1718	748	483	657	1347	1417	3613	720	676	1618	1201	744	637	357	304	2881	1389	797	748	347	308	1456	745	866	524	481	321	1346	948	578	2354	438	129	5082	1676	615	1785	313	130
AT1G01140	Carubv10009130	CARHR001330	Thhalv10007632	1330	2549	2319	2002	1905	1944	1500	1744	2049	1544	1097	1681	1423	2288	2572	2243	2447	1411	3209	968	1083	485	4999	3493	1973	897	1102	824	3447	2297	2701	1325	1129	610	5266	3616	1868	2194	2479	1893	3295	3009	1759	1227	1602	1699
AT1G01160	Carubv10010354	CARHR001310	Thhalv10008482	1480	1063	1400	1036	1290	1004	1622	1336	1355	1732	1180	1059	1596	898	962	1087	1039	929	944	616	577	757	929	784	1401	860	961	1084	1032	639	976	633	1004	990	974	901	1310	1660	1263	1191	1239	1175	1127	965	977	970
AT1G01170	Carubv10010775	CARHR001300	Thhalv10009224	1744	1134	1704	1081	1462	1077	1872	1441	1820	1959	1379	1164	1859	1209	1886	1364	1015	1228	2446	1362	1969	1482	1304	1155	2012	1197	1966	1925	1617	713	2287	1535	2704	2375	2090	1547	3046	3598	3892	2591	2700	3086	3536	1953	2870	3878
AT1G01180	Carubv10009834	CARHR001290	Thhalv10008287	201	539	349	454	118	224	228	344	349	393	110	170	192	380	403	620	182	147	109	505	257	230	112	152	137	448	124	188	91	175	149	507	188	239	118	175	57	99	261	207	79	66	91	67	263	206
AT1G01190	Carubv10008749	CARHR001280	Thhalv10007320	207	383	334	75	254	202	92	60	120	66	135	155	151	180	185	140	267	114	40	33	36	51	68	15	3	34	20	26	18	14	25	41	15	10	61	10	127	210	183	90	110	137	62	63	25	54
AT1G01200	Carubv10010167	CARHR001270	Thhalv10009311	42	16	47	6	61	24	41	15	48	23	50	24	29	14	29	12	55	31	28	6	38	18	75	27	20	12	28	7	41	36	19	10	16	13	32	22	27	46	63	34	39	61	16	21	23	21
AT1G01220	Carubv10028118	CARHR001250	Thhalv10006637	695	707	1077	834	746	807	567	473	801	496	502	752	850	768	978	948	975	515	787	1194	514	816	706	605	511	1194	791	774	535	583	658	983	803	638	658	677	483	593	738	669	452	558	396	354	512	458
AT1G01225	Carubv10028051	CARHR001240	Thhalv10008506	103	118	132	72	80	78	78	88	143	80	78	90	84	107	108	80	79	58	131	73	163	58	167	88	66	83	93	47	118	56	96	66	84	53	120	59	83	156	111	73	102	92	92	96	108	65
AT1G01230	Carubv10010529	CARHR001230	Thhalv10008983	707	1134	1049	1096	880	893	698	845	864	1108	544	927	904	917	784	971	789	632	657	579	1091	638	393	466	792	609	832	929	476	368	700	419	769	719	562	438	94	138	141	156	102	100	120	76	114	162
AT1G01240	Carubv10009708	CARHR001220	Thhalv10008123	1142	869	434	597	211	211	1254	868	383	766	268	337	1211	764	486	553	200	207	665	392	393	365	174	198	603	341	359	515	185	241	547	322	344	334	411	343	241	290	377	364	170	162	273	169	276	450
AT1G01250	Carubv10010347	CARHR001210	Thhalv10009402	19	21	20	0	45	2	12	21	13	2	35	7	20	17	6	9	17	27	61	27	36	12	148	76	36	18	20	19	163	38	63	33	29	22	128	47	50	23	15	8	68	17	51	8	23	9
AT1G01260	Carubv10008640	CARHR001200	Thhalv10007139	525	1411	673	800	556	731	395	647	553	418	369	623	443	1334	513	657	571	466	971	705	308	497	789	486	488	634	531	438	482	352	708	613	704	545	713	514	453	764	418	318	560	844	337	542	283	288
AT1G01280	Carubv10011315	CARHR001190	Thhalv10007395	0	0	0	0	0	1	0	0	0	0	0	0	0	0	0	0	0	0	0	0	0	0	0	0	0	0	0	0	0	0	0	0	0	0	0	0	4	6	0	2	5	2	5	1	0	1
AT1G01290	Carubv10009994	CARHR001180	Thhalv10008544	433	318	515	389	513	489	511	362	416	403	358	503	548	328	371	397	489	402	214	138	283	184	276	208	224	180	236	184	279	137	225	122	281	194	218	219	292	259	241	208	311	237	228	177	191	217
AT1G01300	Carubv10009005	CARHR001150	Thhalv10009389	1495	1166	3408	1021	2513	1149	1638	1147	2637	1140	1548	1359	1797	1726	1654	1107	1590	1404	923	578	1260	738	932	577	656	555	1409	609	929	768	796	454	1163	629	1042	653	901	704	1244	642	932	534	670	366	786	343
AT1G01310	Carubv10012656	CARHR001130	Thhalv10008629	1	2	8	1	6	2	0	0	0	0	6	0	3	1	2	2	0	3	1	1	4	2	0	5	1	3	5	2	2	2	0	3	3	3	2	1	1	7	0	0	1	3	1	1	3	1
AT1G01320	Carubv10011109	CARHR001120	Thhalv10006538	10071	6406	17598	9970	19341	15033	8535	4653	13067	8802	12743	12782	10923	8874	16875	15016	27721	10251	17602	3644	4478	18044	25289	10601	10030	3756	10288	10219	14358	9109	12674	4990	13606	10379	20367	11855	17057	12816	24036	14723	22022	14692	11786	6903	16708	13972
AT1G01350	Carubv10009639	CARHR001090	Thhalv10009432	622	1131	1042	902	938	707	575	806	948	973	564	819	836	966	930	917	906	693	856	805	1396	1126	1056	821	817	807	1025	1010	860	676	762	856	1150	979	748	760	765	1053	738	662	1625	2337	645	602	589	728
AT1G01360	Carubv10010391	CARHR001080	Thhalv10008854	293	298	300	265	378	322	167	193	307	250	296	275	367	234	302	291	272	196	358	255	376	258	502	411	353	158	319	350	291	205	321	170	302	276	373	268	84	152	159	125	85	116	73	83	113	183
AT1G01370	Carubv10010436	CARHR001070	Thhalv10008889	227	122	203	85	233	81	186	165	198	87	184	138	165	109	95	60	91	105	169	107	209	68	91	64	82	145	208	73	99	47	104	84	158	91	71	54	112	99	154	74	80	17	105	61	84	38
AT1G01380	Carubv10011382	CARHR001060	Thhalv10009233	17	12	24	7	51	16	36	19	23	11	22	25	23	23	14	5	31	13	33	12	27	13	56	31	38	16	30	35	34	9	33	31	21	17	35	18	14	10	7	3	10	4	10	7	6	3
AT1G01430	Carubv10009105	CARHR001010	Thhalv10007590	1809	931	1719	958	1353	1017	2182	863	1669	890	1156	1081	1926	929	1653	1233	1830	749	534	192	213	339	498	305	408	180	380	360	325	265	548	143	395	303	488	328	489	344	631	292	392	287	524	200	588	321
AT1G01440	Carubv10008546	CARHR001000	Thhalv10007009	440	810	663	625	423	429	222	360	506	375	178	468	437	799	669	693	593	295	641	758	268	562	568	449	429	803	487	437	298	308	442	822	555	405	505	347	263	571	587	482	322	656	225	378	390	274
AT1G01450	Carubv10010980	CARHR000990	Thhalv10009834	1	1	1	0	1	0	0	1	1	0	0	2	9	0	3	1	4	0	4	5	2	5	6	6	0	0	4	1	6	4	8	5	5	3	5	12	0	0	0	1	0	0	1	0	0	0
AT1G01453	Carubv10010006	CARHR000970	Thhalv10009686	0	3	27	2	19	0	6	3	13	0	0	0	24	2	19	10	18	0	5	3	22	4	5	3	6	3	12	0	7	2	3	9	5	1	5	4	11	26	18	6	21	7	5	28	10	6
AT1G01460	Carubv10009221	CARHR000910	Thhalv10009579	0	1	9	57	2	0	0	1	13	21	0	3	0	0	1	12	1	0	24	39	13	27	31	32	13	17	29	20	15	19	18	16	44	36	37	11	46	114	56	40	66	118	42	61	49	53
AT1G01470	Carubv10010557	CARHR000900	Thhalv10009011	960	1823	1930	1843	1542	1201	1124	1106	1538	1849	673	1182	902	1332	1352	2011	1415	1269	326	902	1195	927	506	749	388	692	1055	1123	476	427	425	700	1152	1181	584	983	150	504	806	672	518	863	234	247	472	794
AT1G01480	Carubv10009396	CARHR000890	Thhalv10007457	27	301	41	464	49	551	14	86	28	280	18	240	2	193	39	514	29	202	16	2097	187	244	29	347	51	1921	50	246	5	225	36	2097	37	302	23	229	4	24	1	26	19	58	7	30	4	14
AT1G01500	Carubv10009744	CARHR000870	Thhalv10008178	387	461	957	891	587	623	412	316	726	668	422	530	562	391	724	718	489	426	253	344	277	376	244	294	303	326	421	469	221	284	295	329	487	477	191	267	386	708	501	422	448	652	356	471	420	408
AT1G01510	Carubv10011468	CARHR000860	Thhalv10007060	1571	1128	1636	1067	1329	1077	1146	1007	1382	977	1089	1187	1525	1220	1197	1113	1300	802	1242	835	539	782	1060	805	853	794	890	840	904	644	975	819	983	933	1002	695	976	1041	1037	745	1065	952	768	436	812	502
AT1G01520	Carubv10011679	CARHR000850	Thhalv10008382	58	21	2	4	807	410	28	7	7	0	139	310	38	22	0	3	574	210	73	37	18	8	203	140	56	36	4	17	139	60	47	54	12	22	152	61	79	68	4	1	311	178	81	32	1	3
AT1G01550	Carubv10009625	CARHR000810	Thhalv10008079	3059	8957	4857	5351	3939	5536	2433	4384	3531	3601	2129	4974	3352	7258	4310	5958	4323	3982	6647	19725	9623	9449	7783	12281	7231	19387	7003	8662	5359	8455	6686	18518	8069	8413	6722	8376	7198	17899	8630	12094	10828	18576	7560	11770	7233	10668
AT1G01570	Carubv10008901	CARHR000790	Thhalv10007848	31	63	57	48	32	36	30	33	48	44	44	23	67	79	43	55	36	29	7	19	5	9	5	5	10	34	7	2	8	4	1	18	3	4	9	11	0	1	0	0	0	1	0	2	0	0
AT1G01580	Carubv10008441	CARHR000770	Thhalv10006930	150	95	485	90	694	147	419	182	306	109	697	235	71	69	11	25	385	54	277	96	600	249	972	483	331	161	226	251	401	247	410	157	262	179	540	286	199	182	648	143	590	165	270	240	553	178
AT1G01610	Carubv10008926	CARHR000740	Thhalv10007431	1699	1522	2252	1225	1962	1804	2037	1352	1901	1550	1488	1738	1871	1474	1633	1318	1700	1429	1818	1567	1296	1365	1361	981	1349	1197	1772	1291	1128	934	1739	1531	1754	1164	1685	1196	1441	1596	1802	781	3031	1469	1578	858	1370	639
AT1G01620	Carubv10009929	CARHR000730	Thhalv10008397	9711	7497	5011	2400	6845	2620	9314	5117	4969	3841	4501	3747	9873	6670	4105	3396	5069	3025	2982	1567	1807	1999	1815	1425	1642	1444	1897	1645	1382	1036	1944	1244	2034	2231	1897	1130	982	739	1372	494	601	261	721	571	558	349
AT1G01630	Carubv10010070	CARHR000720	Thhalv10008535	1126	1345	1804	1109	1322	1301	1190	846	1426	927	1051	1412	1242	1195	1165	1031	1460	1001	941	1011	778	777	793	861	820	1042	883	821	802	856	877	878	648	561	1069	750	1204	1469	2016	1110	1113	821	1690	945	1773	997
AT1G01640	Carubv10012544	CARHR000710	Thhalv10017613	119	134	200	188	175	138	87	83	177	224	168	139	74	99	141	148	106	71	200	163	444	252	197	234	254	173	341	376	227	153	208	156	333	307	205	211	190	258	232	210	244	241	257	107	197	179
AT1G01650	Carubv10008675	CARHR000700	Thhalv10007312	1082	1807	1780	1676	1690	1871	1315	1484	1489	1861	1451	1809	1247	1668	1354	1473	1831	1496	887	1959	847	1224	1053	1351	1201	2238	1074	1289	999	1221	946	2181	1166	1216	1191	1380	1306	2747	1671	1420	2249	3263	976	1635	1255	1165
AT1G01660	Carubv10008712	CARHR000690	Thhalv10007636	59	36	69	31	57	26	42	54	38	38	34	41	58	51	28	29	42	31	2	29	11	7	19	22	11	119	31	17	14	14	5	10	7	5	3	6	804	1209	771	660	655	649	671	660	571	746
AT1G01680	Carubv10009781	CARHR000680	Thhalv10008431	16	49	25	83	50	200	7	13	11	30	7	101	11	19	3	47	20	62	281	774	223	55	122	179	988	2759	89	58	108	73	92	313	25	34	108	183	4	14	28	63	74	176	9	33	21	25
AT1G01690	Carubv10009137	CARHR000670	Thhalv10007771	252	141	223	97	189	117	255	159	220	132	162	168	269	139	153	100	144	96	223	364	203	186	126	151	167	359	197	158	90	58	115	250	225	187	122	110	330	237	215	103	244	175	249	159	196	100
AT1G01700	Carubv10011721	CARHR000650	Thhalv10007495	26	13	57	20	42	23	29	22	28	2	22	29	51	27	25	19	14	16	73	31	57	30	107	70	68	40	58	53	96	58	57	26	40	44	79	47	116	206	147	100	82	67	101	74	59	80
AT1G01710	Carubv10009215	CARHR000630	Thhalv10007689	1283	1026	1359	1073	1110	1066	1361	1099	1116	1357	917	1137	1217	963	1017	1040	1032	911	1565	1490	1384	1766	2327	2638	1474	1601	1661	1743	2186	2351	1609	1303	1907	1665	2302	2239	2030	1855	2694	2117	2274	2263	1829	993	1972	1784
AT1G01720	Carubv10009926	CARHR000620	Thhalv10008371	1041	1686	1310	1571	2038	2017	904	1231	926	1359	920	1628	752	1211	904	1340	1466	1353	401	564	296	344	1713	1447	231	405	321	386	1280	860	352	483	356	320	953	897	382	1052	812	738	1118	1552	433	612	436	672
AT1G01730	Carubv10010200	CARHR000610	Thhalv10008538	634	881	855	897	889	966	731	806	747	998	529	841	692	719	563	764	581	652	572	478	330	527	589	548	492	412	597	548	523	504	470	356	707	535	487	479	0	0	0	0	0	0	0	0	0	0
AT1G01750	Carubv10011760	CARHR000570	Thhalv10009057	83	130	363	51	432	97	242	117	245	50	265	119	289	125	229	76	371	79	9	17	166	50	56	41	82	27	95	31	52	19	53	22	48	43	58	11	46	231	122	64	111	80	52	110	69	62
AT1G01760	Carubv10011834	CARHR000560	Thhalv10007725	100	131	141	113	122	70	43	65	118	67	47	83	143	139	154	125	95	51	269	111	214	299	197	92	134	79	241	149	125	72	174	100	327	228	160	127	264	346	414	309	259	268	174	204	277	293
AT1G01770	Carubv10012179	CARHR000550	Thhalv10007047	746	584	1128	1178	443	528	855	571	910	1245	338	473	841	604	1404	1600	538	340	665	342	257	726	407	325	499	310	602	530	304	263	487	286	722	592	414	393	969	1155	1473	1728	827	1084	779	622	1133	2096
AT1G01780	Carubv10010886	CARHR000540	Thhalv10008789	953	299	582	465	729	408	1543	731	575	1119	912	341	814	290	405	380	370	300	318	268	191	306	193	221	589	224	425	484	256	223	383	213	506	492	266	236	448	625	362	339	447	321	388	290	229	364
AT1G01790	Carubv10011770	CARHR000530	Thhalv10006595	2262	3728	4122	2517	2428	2309	1705	1610	2882	1463	1266	2305	1872	3397	3838	3005	2767	1329	5055	2478	1875	4990	6560	3099	2032	2131	5067	3585	2841	2262	3118	2233	5288	2851	5038	2874	1839	2032	4653	1885	2227	1457	1621	1309	2753	1345
AT1G01810	Carubv10012511	CARHR000510	Thhalv10009772	29	11	38	24	58	17	29	7	22	45	36	37	36	14	26	15	50	40	76	44	13	39	57	94	66	33	84	88	106	62	106	52	93	58	144	111	45	35	8	10	32	13	17	31	21	5
AT1G01830	Carubv10008707	CARHR000500	Thhalv10007207	367	318	421	250	509	313	354	260	405	272	271	364	266	276	292	259	429	285	876	467	250	381	1393	1077	714	364	572	460	1216	869	783	364	618	367	965	1068	366	358	203	165	506	456	312	141	128	129
AT1G01840	Carubv10011703	CARHR000490	Thhalv10009990	39	15	44	12	42	12	37	19	30	30	18	26	32	15	12	6	19	19	200	83	154	130	135	129	128	69	162	160	118	72	171	86	188	210	144	115	192	203	212	148	190	212	229	95	160	198
AT1G01860	Carubv10009683	CARHR000480	Thhalv10008101	466	289	534	307	467	294	369	332	514	251	330	355	478	262	434	381	359	240	759	409	506	423	611	391	636	493	676	583	583	287	598	520	508	423	573	417	552	525	640	289	342	190	549	271	490	338
AT1G01880	Carubv10011785	CARHR000470	Thhalv10007143	93	74	143	78	76	46	72	102	134	73	48	38	144	102	116	77	61	43	364	239	200	301	453	298	309	289	383	259	320	209	337	251	470	374	301	266	160	145	156	101	127	149	131	78	111	83
AT1G01900	Carubv10008379	CARHR000460	Thhalv10006878	116	154	186	87	208	106	86	92	146	41	114	124	126	174	108	122	187	96	45	59	34	51	102	50	84	39	65	28	67	23	73	50	77	54	115	53	188	207	211	86	182	55	134	98	104	40
AT1G01910	Carubv10009581	CARHR000450	Thhalv10008053	1280	1510	2523	2444	1750	1467	1270	1320	2030	1981	1265	1592	1391	1517	1970	2365	1630	1337	818	528	1040	879	910	901	1066	721	1035	1098	1125	740	936	568	900	988	862	956	1060	1104	1359	1231	1176	1305	941	742	1188	1105
AT1G01920	Carubv10008771	CARHR000440	Thhalv10007294	800	730	955	555	755	600	593	621	724	648	425	648	766	689	708	530	653	413	441	343	463	402	479	466	481	442	415	450	381	329	451	299	549	512	411	413	1394	1612	1508	1126	1398	1500	1112	818	1118	1082
AT1G01930	Carubv10008663	CARHR000430	Thhalv10007219	491	667	704	510	567	437	567	541	572	580	469	518	500	609	622	620	594	348	736	638	412	760	579	578	771	668	722	848	557	504	667	548	817	826	502	592	310	348	231	187	210	216	242	167	199	257
AT1G01940	Carubv10012351	CARHR000410	Thhalv10008970	670	742	1025	816	1067	700	856	749	779	908	766	851	700	572	683	705	1041	959	918	540	996	724	989	832	884	472	837	815	988	708	873	479	947	918	899	853	449	524	450	327	293	305	463	340	376	252
AT1G01950	Carubv10008265	CARHR000400	Thhalv10006753	614	813	851	561	935	736	539	549	753	388	512	693	640	1016	645	665	963	585	1162	997	435	856	2052	1607	832	995	812	686	1331	1050	884	871	868	770	1448	1150	1634	2000	1500	1403	1595	1644	1171	1125	1234	1260
AT1G01960	Carubv10008079	CARHR000390	Thhalv10006576	3147	4253	4495	3664	2721	2517	2859	2400	3116	2824	1831	2580	3100	4209	4226	4745	3592	1940	4201	3217	1707	3399	3274	2443	3128	3254	2729	2511	2321	2439	3094	3042	2781	2278	3003	2643	3275	3460	4346	3735	3187	3490	2632	1804	3043	2433
AT1G01970	Carubv10009324	CARHR000380	Thhalv10007755	939	735	1190	741	1171	960	788	663	933	862	902	1073	1066	709	1034	966	1138	652	2295	684	557	955	3563	2099	1689	598	875	869	3017	1901	1955	820	1152	926	3571	2377	1887	2098	2497	1459	1706	1382	1719	1230	1982	1295
AT1G01980	Carubv10011221	CARHR000370	Thhalv10007313	6	1	1	0	2	3	3	0	2	2	0	3	2	2	5	0	1	1	0	0	0	1	0	0	0	1	0	1	1	0	0	0	0	0	0	0	0	0	0	1	2	0	0	2	0	3
AT1G02010	Carubv10008507	CARHR000350	Thhalv10006989	336	293	338	264	811	608	316	240	302	312	349	526	362	306	284	253	536	335	908	374	281	759	973	943	874	350	820	932	850	633	795	297	1015	926	1139	791	502	421	316	140	270	166	320	197	237	152
AT1G02020	Carubv10008571	CARHR000330	Thhalv10007140	367	318	417	313	276	315	319	247	376	234	134	292	361	337	396	458	362	303	1222	473	606	1295	1140	747	1025	423	1298	1205	943	815	1019	561	1494	1261	964	905	0	0	0	0	0	0	0	0	0	0
AT1G02040	Carubv10011272	CARHR000300	Thhalv10008559	0	0	2	0	2	0	0	0	0	0	5	0	0	0	1	1	0	0	89	97	51	89	96	101	100	124	107	90	61	70	87	104	104	116	66	81	0	0	0	0	0	0	0	0	0	0
AT1G02060	Carubv10011958	CARHR000280	Thhalv10006939	122	257	308	255	132	108	44	55	191	74	34	154	162	281	375	339	218	60	117	85	51	137	198	54	29	62	67	42	38	56	67	61	121	48	64	58	175	170	303	189	258	228	127	92	201	95
AT1G02065	Carubv10009506	CARHR000270	Thhalv10008083	42	49	52	39	49	29	38	29	51	42	16	54	25	58	18	30	20	23	20	26	16	18	17	15	7	21	27	20	13	11	30	30	44	11	27	12	9	9	1	2	5	3	3	9	0	1
AT1G02070	Carubv10011621	CARHR000260	Thhalv10009084	1	5	10	8	7	5	20	12	17	17	0	5	11	5	2	12	1	2	0	2	0	0	4	0	3	1	2	0	1	2	0	0	1	1	2	3	1	2	2	1	1	5	1	0	0	2
AT1G02080	Carubv10012145	CARHR000250	Thhalv10006521	2860	4536	4582	3862	3606	3514	1949	1832	2895	2245	1766	3365	2817	4369	4329	4865	5066	2169	4504	2976	1815	4964	6021	4247	2706	2830	2797	2816	3001	3320	3457	2794	3589	2965	4214	3449	4352	5192	6088	4470	6296	8394	2771	2665	3780	2917
AT1G02090	Carubv10009724	CARHR000240	Thhalv10026057	1538	1507	2180	1411	2946	1977	1803	1490	1649	1702	1696	2032	1779	1193	1371	1104	2563	1785	1902	1631	1530	1623	1589	1838	1972	2130	1937	1852	1894	1294	1670	1659	1979	2005	1727	1712	914	1073	1068	840	1149	1210	829	683	872	1043
AT1G02100	Carubv10009548	CARHR000230	Thhalv10008126	1585	1508	1758	1744	1639	1745	1591	1586	1366	2081	1115	1481	1570	1327	1502	1494	1315	1140	864	678	517	830	1112	1106	950	826	871	989	1161	698	910	605	948	936	920	838	859	933	1214	801	1046	1160	667	550	823	581
AT1G02110	Carubv10008455	CARHR000220	Thhalv10006946	1031	622	1021	465	1022	419	1017	672	871	441	620	604	942	763	594	463	631	487	449	240	127	159	579	446	293	387	237	226	501	314	310	240	305	275	513	382	94	90	292	127	70	81	66	52	183	90
AT1G02120	Carubv10008556	CARHR000210	Thhalv10007106	2804	4867	3770	4437	3215	3893	2683	3991	2894	3957	1938	3603	2664	3836	2900	3786	2560	2397	2410	2551	1716	2525	2497	3289	3064	2837	2650	2822	1902	2054	2197	2240	2497	2646	1898	2594	3372	8639	3359	4394	4307	7413	2914	5044	3018	4648
AT1G02130	Carubv10010169	CARHR000200	Thhalv10008797	1318	1327	1803	1254	1674	1374	1630	1226	1429	1473	873	1335	1532	1175	1184	1307	1316	1190	2772	2620	3860	2586	2064	2310	2676	2707	3109	3455	2127	1905	2677	2319	3541	3130	2388	2349	1209	1452	1204	858	1285	1041	1130	830	977	961
AT1G02140	Carubv10010485	CARHR000190	Thhalv10009013	3945	3355	5282	3810	5737	4198	5505	4505	5132	6411	5131	4086	4842	2980	3887	3431	4574	3690	3477	3529	4366	3132	3500	3825	4691	4442	3995	4423	3987	2809	3648	3927	3674	3969	3371	3556	3142	3948	4117	3231	3023	2563	3315	2480	3197	2934
AT1G02145	Carubv10011809	CARHR000180	Thhalv10007459	965	736	999	729	979	789	963	894	900	852	595	753	1129	648	773	703	805	507	1124	1109	629	914	809	981	1386	1249	1026	1106	728	684	1058	994	1227	1319	980	754	575	477	597	407	363	251	534	282	488	380
AT1G02150	Carubv10011354	CARHR000170	Thhalv10007383	3176	2568	4266	2360	2808	1893	2876	2116	3854	2442	1624	2312	3650	2801	3356	3015	2646	1851	4513	1518	1258	2577	3045	1505	2242	1579	2768	2427	2077	1360	3126	1845	3470	2600	2915	1811	1896	1654	1835	932	1244	1009	1829	847	1374	943
AT1G02160	Carubv10011359	CARHR000160	Thhalv10009237	810	523	906	608	823	552	825	761	841	1036	610	579	751	475	572	521	473	503	680	522	813	448	690	752	839	493	547	601	770	322	670	517	628	590	714	705	0	0	3	0	1	0	1	0	0	0
AT1G02170	Carubv10011418	CARHR000150	Thhalv10004433	991	2814	1236	1769	1087	1729	950	2573	1108	2006	724	1570	948	2527	942	1531	879	1473	880	3984	651	1087	699	1852	977	3929	994	1466	575	1202	878	3549	1164	1424	781	1295	1318	3164	1374	1543	2253	3795	1136	1903	1110	1628
AT1G02190	Carubv10008574	CARHR000130	Thhalv10007056	1	4	5	4	7	1	2	0	4	6	0	2	2	7	9	1	3	3	0	32	2	2	3	10	0	46	0	0	3	5	2	37	0	1	2	2	7	45	1	0	11	22	0	22	0	0
AT1G02205	Carubv10008547	CARHR000120	Thhalv10009534	392	502	497	166	297	129	331	270	443	129	126	238	335	499	318	204	277	195	400	298	106	109	219	117	143	189	344	140	171	67	401	315	338	201	181	133	15	10	5	4	12	6	4	9	4	4
AT1G02260	Carubv10008913	CARHR001550	Thhalv10007447	484	452	930	957	465	370	386	420	766	775	193	411	414	462	719	798	377	372	611	745	540	553	410	451	458	766	770	466	414	332	441	819	713	553	447	498	125	129	156	231	232	315	124	81	164	169
AT1G02270	Carubv10008987	CARHR001560	Thhalv10007319	584	731	889	1027	918	797	630	661	665	902	778	896	752	786	752	790	961	622	834	1197	958	742	1621	1607	1672	2219	976	975	1541	1038	1030	1139	1011	1000	1279	1340	764	907	1086	1005	1700	1950	674	611	923	758
AT1G02280	Carubv10010930	CARHR001580	Thhalv10008332	3591	2738	4006	2148	4092	2090	3368	2883	3779	2772	2530	2254	3942	3020	3354	2677	3003	1779	3792	2014	2768	2436	2620	1682	2870	2578	3112	2560	3200	1491	3011	2551	3388	2569	3211	2146	3471	3397	3863	2210	2207	1408	3101	1893	2904	2523
AT1G02290	Carubv10012070	CARHR001590	Thhalv10009871	270	251	336	179	195	186	272	155	206	120	80	243	254	212	250	226	299	167	413	180	462	333	461	294	261	139	320	306	308	329	403	163	407	345	405	339	228	142	194	150	182	155	200	104	136	97
AT1G02310	Carubv10011405	CARHR001620	Thhalv10007769	35	45	37	73	32	44	25	10	17	9	39	18	42	19	10	37	27	10	26	33	19	12	37	24	33	55	16	23	27	13	34	22	5	15	44	32	28	21	49	15	21	41	13	13	30	31
AT1G02330	Carubv10009977	CARHR001640	Thhalv10008452	676	1085	1284	1014	1229	1004	662	838	1127	965	629	1171	881	933	975	976	1250	840	545	333	628	545	517	495	674	519	697	689	598	312	549	461	715	784	468	398	932	797	884	631	1386	1398	862	573	738	643
AT1G02335	Carubv10010261	CARHR001650	Thhalv10008737	28	211	149	68	131	41	68	50	110	55	27	43	89	196	72	103	132	42	36	106	123	82	108	43	38	61	47	32	36	24	71	68	58	54	94	27	39	89	157	126	46	27	86	36	48	55
AT1G02340	Carubv10009652	CARHR001660	Thhalv10008396	34	51	40	45	121	99	41	43	39	39	84	88	91	43	71	48	128	73	295	176	302	89	198	159	96	105	105	60	66	105	227	198	115	74	208	90	316	357	459	211	276	138	265	199	246	342
AT1G02360	Carubv10010007	CARHR001680	Thhalv10008465	281	9002	406	4906	487	6470	209	5448	214	2790	604	3047	282	6698	261	3736	461	2621	41	13628	375	1262	555	3319	342	15739	391	2037	309	2019	188	11405	360	1772	284	1148	212	691	430	461	488	945	185	313	213	387
AT1G02370	Carubv10008848	CARHR001690	Thhalv10007036	327	248	721	379	659	517	359	201	499	299	359	524	377	285	406	359	651	365	256	261	378	280	547	376	387	365	392	252	367	271	273	354	372	361	318	307	939	606	1020	560	1205	1131	652	426	788	470
AT1G02380	Carubv10010187	CARHR001700	Thhalv10009390	95	60	122	92	100	74	85	80	104	57	58	66	117	105	113	85	112	37	151	226	121	132	106	66	94	260	158	146	109	57	119	237	111	153	107	95	214	388	262	238	268	374	181	284	190	266
AT1G02390	Carubv10008716	CARHR001710	Thhalv10007347	22	176	46	85	47	95	36	76	23	33	21	43	16	74	25	46	41	39	43	230	140	86	105	212	85	314	78	104	92	185	74	244	51	62	114	170	164	156	228	117	945	124	195	87	241	35
AT1G02400	Carubv10009706	CARHR001720	Thhalv10008179	119	2758	348	1114	258	1110	149	1768	275	683	242	808	212	2831	242	837	206	568	38	3554	265	284	169	620	90	2675	97	252	91	421	53	3485	142	384	63	334	145	1939	149	261	666	1437	87	1815	71	164
AT1G02410	Carubv10009922	CARHR001740	Thhalv10008363	554	974	975	923	891	1252	561	813	860	835	732	1051	585	830	670	752	853	852	293	647	548	377	548	451	378	819	530	410	493	301	315	688	453	402	433	454	601	1122	676	392	686	679	418	728	492	399
AT1G02420	Carubv10012086	CARHR001750	Thhalv10007463	81	165	219	132	94	135	21	48	119	37	58	110	84	160	192	165	182	48	219	98	259	185	256	160	154	108	147	110	128	111	151	117	208	140	186	145	161	115	153	90	213	149	95	67	131	87
AT1G02450	Carubv10010607	CARHR001770	Thhalv10009031	0	15	9	109	2	138	0	11	9	76	7	104	1	6	5	80	2	106	56	94	620	25	46	57	77	117	81	32	47	33	27	45	36	59	16	59	5	38	7	139	24	257	7	26	14	48
AT1G02460	Carubv10008847	CARHR001780	Thhalv10007481	36	89	99	115	206	256	30	55	59	50	60	215	46	60	36	82	163	152	42	86	31	101	129	155	21	83	41	64	41	114	33	36	39	65	57	107	47	22	68	111	56	82	30	9	29	40
AT1G02470	Carubv10011810	CARHR001790	Thhalv10008621	94	112	130	313	394	372	137	82	103	312	206	242	86	87	145	286	255	170	84	20	153	268	130	247	126	25	153	407	74	101	118	16	313	450	92	164	30	32	57	123	106	41	39	18	89	120
AT1G02475	Carubv10010960	CARHR001800	Thhalv10008722	998	1222	1842	1851	1478	1714	1146	869	1636	1812	917	1531	1281	1141	2027	2255	1595	1128	2408	1173	2133	1886	2204	1843	1817	1342	1966	2056	2116	1646	2298	1305	2423	2053	2637	1975	1058	1059	1604	1085	865	804	1328	809	1360	1259
AT1G02500	Carubv10009376	CARHR001810	Thhalv10007845	13556	17888	11303	17076	18185	19784	14413	14768	9384	15925	15305	15982	11527	14327	7343	15064	13988	15850	2335	7115	1938	1473	2424	2749	2490	7857	2118	2163	2131	1894	2235	5726	2228	1625	2423	2041	23537	39359	36862	38753	33051	53958	22555	24164	39690	30115
AT1G02520	Carubv10008098	CARHR001850	Thhalv10006577	189	625	451	795	318	660	105	122	184	394	115	445	162	319	285	655	282	255	179	320	637	854	825	910	311	362	302	477	204	1132	292	258	322	420	329	879	406	554	972	609	1706	2276	269	286	771	343
AT1G02560	Carubv10009892	CARHR001870	Thhalv10008324	5528	6109	8464	4758	5464	3931	6070	4867	8202	5186	4050	4262	6516	5601	7587	5883	4268	3042	9270	6201	4500	7361	6725	4746	7038	6777	8761	7586	6003	3829	6797	6395	9965	8130	6710	5042	5950	6910	9248	4598	4516	3278	6535	4794	6370	4706
AT1G02570	Carubv10009964	CARHR001880	Thhalv10009368	3	3	22	15	30	18	6	7	9	14	22	8	11	8	9	13	20	1	46	56	33	32	37	96	52	72	16	49	45	32	34	40	34	33	40	45	22	76	34	16	20	20	11	26	11	7
AT1G02580	Carubv10012183	CARHR001890	Thhalv10009931	6	11	17	56	36	76	1	6	4	20	13	35	14	8	7	42	12	44	1	4	0	1	18	11	2	4	1	1	12	5	4	2	4	2	8	5	1	1	0	0	0	4	0	0	2	0
AT1G02610	Carubv10010204	CARHR001900	Thhalv10008710	296	427	617	828	193	300	344	359	576	1068	74	202	372	234	704	847	148	121	454	259	2591	1429	238	276	401	133	1589	1364	163	124	494	293	1244	662	420	318	1197	1714	2614	2179	456	588	1842	809	1846	2466
AT1G02630	Carubv10009401	CARHR001920	Thhalv10007870	8	5	10	1	4	0	8	0	0	3	6	0	3	4	1	1	0	0	12	5	9	6	7	8	2	2	10	2	4	5	7	4	6	5	13	6	4	4	9	6	7	1	2	2	2	4
AT1G02640	Carubv10008371	CARHR001930	Thhalv10006876	2010	2506	1630	937	346	171	1253	1453	1436	1209	200	381	1781	1833	1557	1544	289	217	1690	847	2916	4475	224	164	580	572	3150	2697	138	170	1009	767	3367	2385	321	261	1486	2003	2849	2612	143	141	1820	600	1481	2068
AT1G02660	Carubv10011093	CARHR001940	Thhalv10006955	824	2059	1484	2135	105	261	416	963	1223	1629	71	314	651	1560	1827	2709	185	185	126	332	1519	1288	50	36	53	364	854	688	14	40	95	492	781	388	68	74	560	1921	1722	1254	449	851	445	1368	1179	1056
AT1G02680	Carubv10010486	CARHR001960	Thhalv10009111	447	307	488	396	435	399	370	383	497	630	510	364	434	256	334	419	322	285	504	400	446	415	374	386	759	474	614	639	465	279	505	417	687	657	454	415	697	1001	687	484	466	484	699	527	551	765
AT1G02700	Carubv10010109	CARHR002000	Thhalv10008633	14	5	2	4	9	4	12	7	4	0	0	3	2	2	0	4	7	20	4	14	11	6	7	7	4	8	5	1	6	2	12	14	18	0	45	43	7	6	9	1	25	163	7	9	1	1
AT1G02720	Carubv10009529	CARHR002020	Thhalv10008011	294	271	389	205	332	189	242	254	435	190	164	243	370	312	310	188	294	155	583	450	287	410	304	290	413	435	505	398	327	271	404	392	634	456	415	384	73	37	25	20	17	12	53	28	28	14
AT1G02730	Carubv10008123	CARHR002030	Thhalv10006597	634	540	1450	362	715	222	450	304	1252	376	394	480	664	787	842	346	503	257	1046	346	428	412	766	286	388	444	736	341	475	254	416	356	583	377	464	231	746	481	899	292	341	139	437	262	425	233
AT1G02740	Carubv10009970	CARHR002040	Thhalv10008162	265	343	446	314	293	254	198	195	299	214	126	311	325	341	367	280	365	182	186	200	415	301	348	291	279	242	380	336	193	125	275	271	393	344	234	194	330	618	259	212	416	514	246	470	211	261
AT1G02750	Carubv10010253	CARHR002050	Thhalv10008730	359	374	614	732	505	569	313	377	577	747	230	558	360	342	600	651	534	386	697	804	1001	743	835	919	759	1057	955	1006	610	563	774	878	1075	911	795	762	1042	1543	699	1076	1628	3257	714	1354	740	1049
AT1G02790	Carubv10012094	CARHR002080	Thhalv10007721	0	0	0	2	0	0	0	0	0	3	0	0	0	0	0	0	0	0	0	0	0	0	0	0	0	0	0	0	0	0	0	0	0	0	0	0	0	0	0	0	0	0	0	0	0	0
AT1G02800	Carubv10011914	CARHR002100	Thhalv10007402	133	39	74	10	65	8	106	44	60	27	32	45	81	71	10	3	32	32	17	5	3	2	4	3	3	6	5	6	11	1	1	8	12	5	4	2	51	28	22	14	36	10	25	7	14	3
AT1G02810	Carubv10011654	CARHR002110	Thhalv10007177	139	267	277	106	251	101	84	96	128	47	166	139	139	152	220	169	233	83	59	61	99	83	59	51	50	101	76	51	62	31	56	72	68	102	47	27	130	169	131	115	100	72	94	103	72	74
AT1G02813	Carubv10012198	CARHR002120	Thhalv10009715	0	0	0	0	10	0	2	0	0	0	0	1	1	1	0	2	1	1	0	2	0	0	0	0	0	0	0	0	0	0	0	0	0	0	0	0	2	0	0	0	12	3	2	0	0	0
AT1G02816	Carubv10010322	CARHR002130	Thhalv10008908	491	597	862	981	688	551	474	457	791	881	269	449	568	489	776	910	614	469	316	97	193	97	168	187	240	104	97	135	128	135	255	95	152	131	299	142	769	837	1011	1416	1424	1443	973	464	829	1555
AT1G02820	Carubv10010737	CARHR002140	Thhalv10009185	157	227	47	82	1491	536	201	123	44	38	422	461	184	161	76	67	541	317	111	78	159	20	1663	1164	70	61	45	26	708	793	261	114	95	44	1326	746	147	162	40	33	400	151	271	74	23	31
AT1G02840	Carubv10011968	CARHR002180	Thhalv10008507	5226	4205	5471	4140	5309	3411	4672	4104	4718	4763	3224	3951	5136	4040	3759	3490	3581	3104	1771	1254	746	1367	1901	1434	1516	1327	1309	1368	1819	1423	1390	1314	1466	1459	1547	1455	1721	1945	1502	1119	1243	943	1388	984	1132	1043
AT1G02860	Carubv10009650	CARHR002200	Thhalv10008149	476	1305	933	892	527	660	437	775	752	775	324	475	699	1166	945	904	631	485	607	981	1166	836	442	746	488	921	685	707	433	514	527	948	670	651	429	631	184	416	431	455	839	1298	189	271	225	421
AT1G02870	Carubv10010371	CARHR002210	Thhalv10008837	1088	615	1567	785	1613	835	893	796	1344	1233	1243	898	1025	772	943	717	1253	938	1514	1142	1272	984	1587	1169	1530	1175	1426	1008	1339	736	1300	1322	1544	1252	1113	876	1247	1015	970	607	1343	834	888	539	742	518
AT1G02880	Carubv10007400	CARHR002230	Thhalv10008492	401	1243	801	769	968	1033	483	853	672	638	624	846	431	1138	497	530	662	566	40	56	25	58	26	29	29	32	27	41	15	42	33	54	31	26	26	44	250	452	409	516	655	805	244	354	432	435
AT1G02890	Carubv10008107	CARHR002240	Thhalv10006579	2137	5019	3727	4032	2344	2772	1258	1642	2493	1968	1032	2473	2263	4045	4020	4852	3478	1608	3372	3272	1605	4581	2485	2648	2717	3303	3102	3885	1534	1928	2815	3020	3859	3408	2267	2372	3315	4820	4630	4505	4363	6633	2937	2798	3583	3525
AT1G02900	Carubv10012118	CARHR002250	Thhalv10009124	437	1874	932	788	639	745	422	696	680	569	430	545	567	767	593	586	618	422	18	55	40	50	26	31	15	55	14	9	25	23	21	62	13	36	20	30	290	489	236	139	194	245	205	227	143	176
AT1G02910	Carubv10009110	CARHR002260	Thhalv10009985	1636	1693	2565	1719	1705	1421	1541	1363	2146	1801	1200	1345	1843	1722	2192	1914	1243	965	1465	1479	803	1073	1396	1016	1260	1633	1690	1297	1283	771	1221	1454	1707	1390	1267	990	1140	1292	1628	894	804	830	1140	813	1208	838
AT1G02950	Carubv10010097	CARHR002280	Thhalv10008570	95	265	215	108	184	98	150	182	137	180	71	58	132	146	107	120	123	46	16	26	20	18	18	18	20	15	19	23	13	9	11	21	19	15	20	4	95	120	102	101	73	65	42	51	31	60
AT1G02960	Carubv10012349	CARHR002290	Thhalv10007546	795	706	792	681	540	498	717	741	770	631	266	460	898	721	777	649	416	315	318	238	147	254	211	208	300	246	304	309	174	111	256	250	361	298	258	215	223	271	163	170	151	175	200	163	145	162
AT1G02970	Carubv10008963	CARHR002300	Thhalv10007445	109	72	126	58	130	74	64	40	114	54	90	92	117	101	67	49	115	44	197	155	146	95	159	89	157	175	134	82	168	82	122	133	79	110	111	93	120	138	136	75	194	111	96	98	133	48
AT1G02990	Carubv10008104	CARHR002320	Thhalv10006698	500	1239	751	805	580	689	374	494	515	406	421	606	532	995	869	833	849	368	1265	1054	499	1197	1426	1021	751	866	703	750	685	729	1003	963	960	763	1026	879	1130	3071	1315	1478	1737	2614	914	2229	1121	1135
AT1G03000	Carubv10011267	CARHR002330	Thhalv10006717	938	847	1062	773	663	545	608	587	891	657	438	666	903	837	1099	1003	643	434	1155	516	378	1077	1009	662	655	464	809	864	722	578	845	504	1060	810	957	786	457	1138	2093	1296	392	677	418	543	1334	1203
AT1G03010	Carubv10008601	CARHR002350	Thhalv10007049	31	76	76	43	81	53	14	37	37	49	41	65	47	58	55	49	76	47	10	7	6	7	15	2	12	6	16	4	5	6	23	3	12	11	13	12	31	30	36	19	43	33	12	23	21	30
AT1G03020	Carubv10010921	CARHR002360	Thhalv10009174	1	11	12	7	1	5	0	8	22	0	0	1	2	6	20	0	2	0	4	3	7	8	6	7	5	5	2	0	1	2	1	3	1	0	11	2	54	42	162	38	101	105	25	18	34	29
AT1G03030	Carubv10009873	CARHR002370	Thhalv10008317	461	630	650	581	560	578	391	440	535	505	317	524	584	589	438	635	539	396	766	390	709	581	593	530	921	474	569	637	572	339	779	394	789	737	684	526	762	716	707	519	770	616	663	428	528	590
AT1G03040	Carubv10009831	CARHR002380	Thhalv10008279	1195	1525	2130	2006	1989	1888	1339	1447	1897	2317	1410	1587	1254	1361	1450	1513	1359	1250	1419	1479	1130	1936	1336	1697	1542	1683	1931	2305	1158	1228	1308	982	1995	2111	1425	1443	821	789	793	988	989	1391	697	375	744	800
AT1G03050	Carubv10008628	CARHR002390	Thhalv10007148	0	2	2	3	0	0	0	0	1	0	0	3	0	0	0	2	2	0	0	42	8	4	7	19	4	89	1	4	3	13	2	25	8	4	1	17	0	4	1	1	0	4	0	3	0	0
AT1G03055	Carubv10010025	CARHR002400	Thhalv10008499	99	135	54	13	269	226	124	80	46	17	304	207	170	117	67	38	265	138	167	118	87	111	479	437	143	106	115	138	442	254	175	103	151	137	624	330	41	14	8	4	119	40	20	17	3	1
AT1G03060	Carubv10008059	CARHR002410	Thhalv10006519	1336	4860	2323	2968	1561	2210	839	1334	1547	1308	956	1867	1243	4116	2573	3624	2303	1107	3917	6149	1381	4380	3535	3002	2528	5945	2206	2521	1697	2116	2175	5151	2424	2580	2418	2194	3073	7461	3296	3652	4748	9819	1985	4592	2657	2410
AT1G03070	Carubv10011301	CARHR002420	Thhalv10008600	18	43	23	15	116	12	62	42	13	0	34	26	35	32	31	24	161	44	8	27	20	14	16	19	3	14	6	13	20	24	12	13	9	6	106	115	13	26	15	6	30	234	5	5	1	4
AT1G03080	Carubv10008080	CARHR002430	Thhalv10006534	1789	6215	3531	4098	2702	3265	1480	2438	2525	2910	1498	2887	2141	4529	4149	4319	4170	1947	2556	5342	1442	2754	3244	3305	2882	5578	1872	2824	2069	1559	2209	4045	1874	2143	2253	2453	3791	6515	4273	4718	7527	11516	2807	3896	4060	3619
AT1G03090	Carubv10008397	CARHR002440	Thhalv10006937	3559	4493	5020	8667	817	652	3499	3675	4703	10151	471	890	2842	2693	9191	13009	820	452	1619	2227	1928	3981	513	856	1146	1691	2488	2857	413	378	1301	2257	3524	2409	975	781	884	2153	3301	3777	894	2167	960	1114	1972	4150
AT1G03100	Carubv10011829	CARHR002450	Thhalv10006842	70	105	298	108	126	110	44	43	198	100	52	129	109	115	203	170	179	126	126	66	105	99	290	145	147	97	108	112	230	107	133	92	132	132	200	147	288	289	535	346	354	317	211	146	404	309
AT1G03110	Carubv10009228	CARHR002460	Thhalv10007706	658	536	1014	432	1253	630	519	397	777	495	838	739	676	508	510	412	1112	596	683	424	585	475	1298	629	653	725	785	547	1013	575	633	586	586	554	749	561	969	782	854	546	1010	560	757	481	758	476
AT1G03140	Carubv10011298	CARHR002470	Thhalv10009621	1311	1999	1733	1668	1240	1158	1338	1434	1387	1556	818	1285	1492	1672	1724	1823	1392	1005	1782	1333	1583	1373	1274	1300	1341	1326	1357	1406	908	1178	1341	1304	1554	1235	1148	1302	2097	3082	2197	2109	2349	2816	1988	1641	1774	2048
AT1G03150	Carubv10010452	CARHR002490	Thhalv10008907	1020	796	927	728	1363	778	1308	902	803	1238	1155	840	1025	706	581	777	897	787	912	585	957	671	740	872	1278	783	884	1045	943	474	1030	687	873	922	981	902	730	824	655	617	595	669	727	499	594	723
AT1G03160	Carubv10008235	CARHR002500	Thhalv10006729	1126	1262	1936	1248	1021	909	967	753	1504	947	571	1084	1048	1225	1774	1869	1226	745	1752	653	666	1511	1476	1002	811	595	1441	1324	998	709	1359	623	1707	1223	1528	1120	1633	1585	3264	1891	1433	1423	1346	850	2198	1623
AT1G03170	Carubv10012407	CARHR002510	Thhalv10008552	5	6	13	10	37	6	6	4	14	9	21	14	6	13	6	12	9	18	2	1	0	1	16	20	3	2	1	1	7	4	3	0	0	2	11	1	1	5	4	11	7	11	4	4	6	2
AT1G03180	Carubv10009697	CARHR002520	Thhalv10008478	179	109	186	116	263	95	262	113	183	142	137	133	148	125	108	76	156	87	162	95	112	60	78	103	158	93	110	112	134	64	141	105	127	114	103	113	128	134	41	30	29	40	77	51	46	29
AT1G03190	Carubv10008351	CARHR002530	Thhalv10006888	358	354	512	374	485	398	360	310	423	429	343	356	419	299	443	443	500	293	446	261	217	394	565	472	536	335	445	513	479	326	509	304	503	553	497	433	544	482	647	469	543	473	407	319	444	444
AT1G03210	Carubv10009900	CARHR002540	Thhalv10008339	618	839	739	674	596	641	743	767	616	1025	432	610	507	610	463	588	400	396	116	114	326	247	186	182	263	165	202	226	141	190	201	116	207	267	175	144	361	375	479	605	379	484	311	206	430	559
AT1G03220	Carubv10011636	CARHR002340	Thhalv10007672	3646	44635	7567	14204	4256	6531	3038	20913	5492	10388	2861	6149	3667	38626	6262	12217	4600	5163	1792	57302	5977	7651	2271	11791	1708	45821	4584	5423	1702	7063	2335	48323	5564	7035	2407	8944	2787	73203	9455	16424	10052	20214	4355	48589	4844	14690
AT1G03250	Carubv10010119	CARHR002550	Thhalv10008549	626	1025	1081	1071	1352	1178	988	1134	973	1363	1034	1112	966	898	879	871	1068	818	481	399	541	504	696	807	454	474	563	507	679	517	473	389	510	458	622	552	188	304	339	279	402	516	213	189	255	205
AT1G03260	Carubv10009985	CARHR002560	Thhalv10009966	376	376	524	477	284	294	398	388	365	409	359	312	360	347	380	386	300	257	399	353	278	388	266	342	486	416	490	511	307	272	413	339	519	506	319	367	409	503	395	343	432	405	352	333	372	363
AT1G03270	Carubv10008943	CARHR002570	Thhalv10007435	181	94	177	38	221	110	123	91	127	52	150	114	162	101	112	65	180	79	168	110	40	55	85	111	175	77	83	79	97	44	165	76	79	93	120	83	347	481	162	118	200	277	265	205	119	132
AT1G03280	Carubv10009067	CARHR002580	Thhalv10023437	1283	1537	1601	1385	1439	1306	1301	1207	1410	1514	919	1352	1423	1408	1344	1527	1231	1029	1145	1046	734	1159	1104	1515	1534	1167	1158	1618	1097	1021	1105	1085	1273	1462	1117	1323	974	1174	1115	1001	1195	1588	833	701	888	946
AT1G03290	Carubv10008752	CARHR002590	Thhalv10007330	588	1473	1020	1727	950	1533	659	956	803	1615	490	1289	710	1165	974	1747	1049	1087	47	32	68	82	72	228	133	77	67	145	51	107	48	23	55	91	64	104	899	1217	1257	1736	1470	3178	847	703	941	1515
AT1G03310	Carubv10012076	CARHR002620	Thhalv10006762	503	433	998	364	726	621	452	258	685	243	549	691	621	575	648	501	1180	594	930	190	511	519	1034	441	416	173	527	391	673	516	772	172	596	421	1010	596	547	377	641	241	918	535	502	253	590	168
AT1G03320	Carubv10012047	CARHR002700	Thhalv10009886	18	4	12	8	2	5	10	6	25	9	5	6	12	7	8	9	6	8	17	3	6	5	13	25	12	10	5	10	29	8	7	2	7	3	23	16	27	41	12	12	33	14	32	12	12	10
AT1G03330	Carubv10010754	CARHR002690	Thhalv10009199	1057	823	1490	1122	1525	1045	1384	1113	1396	1611	1258	1204	1251	776	939	973	1020	919	1700	1238	2581	1378	1938	1753	2962	1889	2066	2168	2349	1066	2001	1476	1698	1814	1631	1548	579	483	604	554	592	550	534	318	589	759
AT1G03350	Carubv10009113	CARHR002720	Thhalv10009692	756	1763	1310	1161	1212	1154	695	942	938	593	563	1182	997	1512	1148	1255	1451	892	1575	2110	1637	1159	1732	1499	1226	1980	1118	929	1293	1268	1321	2074	1124	908	1435	1470	1245	2032	1293	1159	1941	2437	1275	1215	1087	974
AT1G03360	Carubv10009740	CARHR002730	Thhalv10008200	546	323	1053	432	1303	658	567	456	820	570	770	688	720	450	628	449	908	558	605	283	621	454	931	682	735	465	619	507	730	450	612	359	615	678	602	499	579	467	684	380	852	671	501	257	561	310
AT1G03365	Carubv10008257	CARHR002740	Thhalv10006805	563	683	840	709	628	646	509	400	688	517	355	594	650	656	867	868	928	421	559	271	288	575	553	358	411	249	557	510	400	264	477	194	647	538	511	392	745	621	921	757	1044	1193	669	339	748	708
AT1G03370	Carubv10008175	CARHR002750	Thhalv10000756	591	6170	1546	2759	728	2128	414	2690	1211	1493	300	1765	768	6155	1642	2640	920	1089	1479	7193	1154	2118	1630	2745	1652	7326	1767	2129	1095	1720	1212	6745	1703	2095	1231	1830	620	3440	1466	1847	1309	3040	586	2785	1117	1501
AT1G03380	Carubv10008219	CARHR002760	Thhalv10006706	964	1458	1168	1566	1035	1505	1038	794	891	1307	622	1279	1164	1293	1329	2042	1187	817	1140	595	612	1380	1247	1495	1087	643	1131	1363	725	847	1045	583	1227	1196	1156	1075	1052	1117	2016	1994	1415	2069	809	548	1471	1346
AT1G03390	Carubv10011653	CARHR002770	Thhalv10007560	0	0	0	0	0	0	0	0	0	0	0	0	0	0	0	0	0	0	0	0	0	0	0	0	0	0	1	0	1	0	0	0	0	0	0	0	17	10	25	2	76	26	23	11	24	20
AT1G03430	Carubv10010558	CARHR002780	Thhalv10009010	569	981	665	512	427	520	630	893	588	663	291	561	607	875	616	479	438	389	636	920	860	584	415	521	936	916	850	774	383	258	598	666	1005	855	416	453	272	261	314	245	244	181	231	121	234	313
AT1G03440	Carubv10009374	CARHR002790	Thhalv10007833	394	344	317	196	879	449	442	229	263	189	333	448	453	378	234	246	731	497	598	433	264	304	973	671	517	328	384	312	692	598	649	469	454	333	999	642	301	411	240	88	388	168	324	193	131	71
AT1G03457	Carubv10009093	CARHR002830	Thhalv10007707	575	342	571	246	371	237	730	441	540	406	437	315	645	334	380	220	321	250	608	805	509	548	486	498	575	838	623	613	513	315	600	855	739	597	473	424	724	1240	753	595	592	876	661	726	693	510
AT1G03470	Carubv10009825	CARHR002840	Thhalv10008490	322	115	467	350	235	107	362	217	488	556	91	101	334	152	388	315	167	113	753	231	346	293	238	138	671	283	504	410	239	115	651	253	584	522	380	208	84	142	180	115	43	68	95	71	97	147
AT1G03475	Carubv10009383	CARHR002850	Thhalv10007888	4737	5133	8414	5215	4358	3496	5360	5394	8421	6573	3425	3661	5472	4766	7193	6298	3226	2740	5511	4680	4453	8135	5481	3950	5911	5785	9365	11436	4910	2457	4695	5012	10870	12951	4718	3377	4584	5420	6880	4335	3762	2941	4548	3677	4440	4162
AT1G03490	Carubv10012206	CARHR289550	Thhalv10017733	0	0	0	0	0	0	0	0	0	0	0	0	0	0	0	0	0	0	0	0	0	0	0	0	0	0	0	0	0	0	0	0	0	0	0	0	0	0	0	0	0	0	0	0	0	0
AT1G03510	Carubv10011372	CARHR002870	Thhalv10007694	60	57	124	72	69	44	40	45	112	70	7	52	46	37	110	87	76	28	65	53	69	79	121	83	101	100	89	64	117	51	79	61	67	76	61	79	73	67	116	45	60	34	47	41	62	50
AT1G03530	Carubv10008331	CARHR002890	Thhalv10006867	571	413	1323	630	1713	732	391	196	871	536	865	927	530	465	977	617	1562	695	440	93	180	433	1712	592	344	169	426	231	769	425	375	131	377	369	567	452	1100	754	1092	511	1527	1085	673	481	849	357
AT1G03540	Carubv10011274	CARHR002900	Thhalv10000094	12	68	95	76	40	42	1	3	41	4	14	31	24	87	102	87	82	16	90	49	61	101	100	58	58	63	73	68	60	30	56	58	133	136	95	61	75	81	124	74	98	75	40	51	69	44
AT1G03550	Carubv10012530	CARHR002910	Thhalv10008409	553	395	576	637	700	517	760	536	478	1016	405	466	675	298	399	455	379	337	0	1	18	4	10	2	6	20	10	12	11	4	2	3	8	3	6	3	18	38	30	13	29	14	12	32	13	16
AT1G03560	Carubv10008524	CARHR002920	Thhalv10007014	418	508	598	564	506	436	371	405	494	385	298	438	492	464	651	478	504	294	676	587	353	503	826	651	783	764	564	628	717	366	565	582	578	578	611	538	0	0	0	0	0	0	0	0	0	0
AT1G03590	Carubv10009068	CARHR002930	Thhalv10007577	825	1569	1130	991	996	2196	751	824	818	874	600	1329	861	1285	822	944	932	1144	728	1169	648	842	1271	2585	830	1233	1088	1223	838	1718	758	844	816	946	794	1444	1413	2371	1975	1316	1047	1444	1372	1182	1358	935
AT1G03600	Carubv10010460	CARHR002940	Thhalv10008901	12840	8167	7957	4259	8277	5821	12509	8669	7901	5707	5858	6677	12912	8817	6780	5309	5867	6130	9492	5333	3493	4202	5118	3509	4579	3389	5676	3860	4834	2958	6540	4752	5897	3868	7692	4634	7721	7459	8500	4044	4614	1785	8678	3278	5384	4291
AT1G03610	Carubv10012401	CARHR002950	Thhalv10008277	976	1369	2156	1906	501	537	905	983	1331	1758	313	607	949	1878	1736	2557	444	327	327	479	373	405	277	294	272	453	362	413	233	238	216	447	285	274	306	259	250	547	506	598	367	605	347	391	351	643
AT1G03620	Carubv10010027	CARHR002960	Thhalv10008491	134	80	106	65	94	93	194	135	116	175	116	75	109	67	72	66	33	61	10	18	13	15	8	32	41	29	22	23	34	14	24	17	19	26	11	13	62	46	43	60	59	90	36	25	42	81
AT1G03630	Carubv10009346	CARHR002970	Thhalv10007802	3480	3330	3635	1448	2271	1896	2906	2143	3169	1277	2127	2760	3584	3496	2678	1876	2808	2091	11734	5139	4345	3513	6995	3420	6845	4741	4956	3334	5814	2851	7565	5189	5439	3901	9598	4410	6993	5702	5826	2284	3246	1650	7110	3579	4029	2183
AT1G03650	Carubv10010366	CARHR002980	Thhalv10008981	96	95	311	202	158	136	146	146	250	244	91	105	128	116	236	193	122	133	81	188	150	89	87	129	84	223	133	98	69	74	78	177	93	137	68	106	112	161	133	78	97	85	83	102	98	74
AT1G03680	Carubv10010421	CARHR003010	Thhalv10008668	4701	4239	9046	4965	3992	3199	6716	4678	9255	6509	4166	3805	5862	4141	7728	6072	3093	3209	9889	6503	5785	8465	6691	5506	7233	6064	12439	9307	6858	4538	8668	6003	13785	9741	9120	6559	1725	1789	4850	2288	1817	1492	1929	1079	3467	2543
AT1G03687	Carubv10009418	CARHR003020	Thhalv10007899	478	312	553	283	426	328	425	247	433	302	335	364	450	337	371	333	392	281	378	208	196	330	405	347	432	279	321	361	395	247	359	215	465	388	337	371	416	352	473	304	305	242	386	185	347	268
AT1G03700	Carubv10012189	CARHR003030	Thhalv10009824	3	10	9	14	6	7	1	2	6	2	12	10	4	4	2	7	2	1	4	26	18	10	5	15	20	23	6	2	5	16	13	13	10	15	11	27	0	10	12	2	2	8	1	2	3	1
AT1G03710	Carubv10011650	CARHR080820	Thhalv10008370	8	1	3	4	10	2	4	1	6	2	3	10	10	13	1	2	4	2	0	0	0	0	0	0	0	0	0	0	0	0	0	0	0	0	0	0	2	8	1	2	7	5	0	6	2	3
AT1G03740	Carubv10008411	CARHR003070	Thhalv10006913	972	7095	2260	4295	761	2916	988	3352	1797	2322	691	2111	956	5649	2681	4220	1025	1212	532	4029	570	1320	600	1614	601	3636	742	1359	413	956	518	3498	825	1296	450	835	1463	7674	1987	3510	3306	7434	1258	6717	1823	2637
AT1G03750	Carubv10008286	CARHR003080	Thhalv10006771	240	328	318	315	254	268	254	289	271	357	140	221	245	343	306	317	199	165	272	239	190	311	204	358	355	329	315	354	192	177	267	237	365	352	224	270	442	641	400	386	450	710	355	362	357	406
AT1G03760	Carubv10011875	CARHR003090	Thhalv10007808	405	381	519	422	466	280	375	329	443	479	250	338	388	382	430	456	467	247	111	88	210	129	284	199	243	156	225	155	273	122	163	84	247	212	186	182	322	317	339	253	384	481	286	218	290	224
AT1G03770	Carubv10009016	CARHR003100	Thhalv10007494	260	470	439	331	368	318	190	378	384	338	173	326	323	586	369	400	324	219	314	479	216	291	297	469	503	924	300	380	236	203	313	448	300	422	295	336	182	203	164	187	275	371	156	112	128	154
AT1G03780	Carubv10008388	CARHR003110	Thhalv10006864	354	275	620	132	401	130	339	213	498	168	200	240	405	308	256	149	166	151	388	150	144	127	255	150	179	180	288	114	233	76	178	140	224	122	140	79	221	138	245	92	107	21	170	84	125	82
AT1G03790	Carubv10011207	CARHR003120	Thhalv10007884	53	8	8	15	33	13	46	4	6	9	0	8	5	3	3	16	8	6	15	2	12	0	13	5	6	5	2	2	4	0	19	0	1	2	17	5	21	5	50	6	27	15	13	21	2	0
AT1G03800	Carubv10011371	CARHR003130	Thhalv10008830	13	13	20	35	66	28	2	6	18	45	15	18	0	19	19	30	19	29	13	4	8	0	1	2	0	4	3	3	2	2	5	5	0	0	3	2	53	113	38	24	26	18	58	58	27	36
AT1G03820	Carubv10011357	CARHR003150	Thhalv10008747	231	235	433	120	404	164	259	130	439	95	335	314	242	118	321	126	294	179	78	51	193	50	172	95	83	51	101	36	167	48	108	48	66	53	170	52	126	131	172	92	121	43	90	61	113	54
AT1G03830	Carubv10008276	CARHR003160	Thhalv10022496	314	321	781	340	386	228	196	174	504	229	177	262	332	321	577	433	455	243	1053	498	351	821	981	684	1140	586	814	902	790	456	899	486	957	852	824	663	413	346	617	413	367	472	245	181	408	357
AT1G03840	Carubv10008897	CARHR003170	Thhalv10009734	89	69	124	29	75	37	62	56	54	36	85	78	47	63	29	25	78	36	42	23	34	39	69	17	16	28	36	32	44	34	34	24	39	29	38	28	86	124	98	78	109	66	60	47	57	45
AT1G03850	Carubv10010567	CARHR003180	Thhalv10008980	521	1258	777	1775	277	1180	536	740	637	1327	223	828	585	729	609	1161	301	512	182	4870	992	443	168	779	490	7981	271	856	100	306	182	5268	225	487	132	319	233	768	204	1217	166	802	160	604	106	824
AT1G03860	Carubv10009925	CARHR003190	Thhalv10008384	2574	2978	4512	3003	3749	2655	2938	2394	3303	2845	2341	2747	2901	2674	3134	3239	3632	2774	2403	1815	2668	1113	2516	1796	3176	2840	1855	1545	2581	1533	2187	2032	1474	1344	2290	1636	4777	5195	4336	3132	3641	2678	4552	3240	3701	2783
AT1G03870	Carubv10011002	CARHR003200	Thhalv10008582	4592	3703	4569	2471	5656	7919	5638	2396	3510	1918	3604	5548	6667	3969	3122	2700	5861	6465	7633	1762	2026	3769	5104	3494	5741	1303	3578	2979	3804	2275	7409	1762	4727	2686	6901	3969	2227	2521	2002	1153	883	459	3147	1023	1311	1118
AT1G03890	Carubv10012169	CARHR003210	Thhalv10009863	0	0	0	0	0	0	0	0	0	0	3	0	0	0	0	0	0	0	4	6	4	0	9	4	4	9	1	4	0	0	6	5	0	3	5	0	25	64	25	33	13	9	45	25	17	34
AT1G03900	Carubv10009732	CARHR003220	Thhalv10003361	2052	2672	2714	2944	2729	2669	2304	2181	2269	2959	2034	2457	2231	2270	2063	2675	2327	2311	2255	3707	1578	2428	1752	2692	2474	3361	2641	3036	2047	2459	2143	3003	2965	2780	1991	2805	1848	2620	2622	2783	2437	2871	1752	1481	2164	2340
AT1G03905	Carubv10009912	CARHR003230	Thhalv10008378	111	389	272	352	408	491	75	283	211	390	261	411	109	306	137	208	241	317	280	361	381	493	428	816	425	458	375	765	435	675	337	314	401	588	353	519	67	220	115	221	154	596	74	140	102	182
AT1G03910	Carubv10008511	CARHR003250	Thhalv10006994	1500	1816	2719	2023	2200	1552	1251	1301	2032	1912	1378	1681	1738	1614	2256	2246	2371	1247	1716	1392	858	1909	2079	1822	1726	1718	1888	1924	1727	1165	1396	1510	1963	1703	1738	1563	1529	1816	1609	1539	2303	2778	1305	959	1234	1839
AT1G03920	Carubv10008713	CARHR003260	Thhalv10007188	79	65	110	68	97	40	151	57	76	52	76	69	92	44	91	48	106	43	11	19	12	19	15	33	21	15	0	32	7	35	14	12	13	11	18	18	19	25	36	13	16	7	11	7	13	20
AT1G03930	Carubv10009684	CARHR003270	Thhalv10003191	977	1159	1208	1101	1107	948	924	799	963	884	696	1005	954	1040	910	1156	1183	669	2147	1130	635	1146	1882	1844	1524	1187	734	1175	1104	1173	1694	1024	827	950	1647	1357	528	486	694	504	592	538	449	286	459	504
AT1G03940	Carubv10011644	CARHR003280	Thhalv10007549	32	18	279	29	102	50	7	13	261	67	107	69	32	33	29	13	79	115	63	16	13	4	190	49	55	19	10	4	146	22	57	14	8	8	116	29	39	12	13	8	49	12	28	12	7	2
AT1G03950	Carubv10010296	CARHR003290	Thhalv10008774	253	411	427	588	380	432	321	317	403	463	305	352	299	298	391	521	358	291	270	1021	480	473	318	546	462	1252	411	592	226	405	350	1031	436	509	277	470	375	614	613	570	472	775	378	342	523	587
AT1G03970	Carubv10011573	CARHR003320	Thhalv10009710	476	608	705	565	412	415	353	456	585	567	270	462	455	604	676	652	413	407	318	471	449	271	173	231	331	505	303	312	177	152	271	488	351	334	268	291	341	679	544	468	418	623	403	426	414	484
AT1G03982	Carubv10010963	CARHR003330	Thhalv10009926	0	0	2	0	6	0	0	0	0	0	0	0	0	0	0	1	0	0	0	1	0	0	0	0	0	0	0	0	3	0	0	0	0	0	0	0	0	0	0	1	0	0	0	1	0	0
AT1G03990	Carubv10012453	CARHR003340	Thhalv10006882	4	3	9	12	23	8	0	0	14	14	9	8	0	3	3	5	7	9	0	1	7	1	1	21	6	1	6	3	2	2	13	5	1	3	7	4	1	1	2	0	0	7	0	0	0	2
AT1G04000	Carubv10011762	CARHR003350	Thhalv10010011	622	399	320	330	831	624	655	488	384	500	613	505	557	341	205	283	513	523	511	635	111	184	402	478	266	443	126	114	326	355	355	482	188	127	516	472	604	1562	256	327	751	1296	452	866	195	290
AT1G04010	Carubv10008666	CARHR003360	Thhalv10007051	443	292	495	337	431	436	342	308	406	275	317	408	287	284	363	319	378	286	340	354	221	231	266	308	380	281	301	301	286	196	365	253	333	243	328	309	427	687	545	533	491	754	328	415	476	490
AT1G04020	Carubv10008319	CARHR003370	Thhalv10006912	279	207	398	156	528	168	196	144	346	141	209	252	250	227	251	244	448	146	328	85	501	215	364	159	231	104	305	203	397	158	162	97	182	101	298	105	279	147	542	263	550	208	237	72	427	181
AT1G04030	Carubv10011017	CARHR003380	Thhalv10007735	171	146	253	168	187	109	161	167	237	174	95	110	196	143	205	171	121	81	154	71	102	77	102	68	82	64	127	69	68	40	104	58	132	117	102	60	48	36	62	52	39	10	43	25	53	27
AT1G04040	Carubv10010000	CARHR003390	Thhalv10008462	2451	2207	4938	1950	5487	5016	3433	1878	3587	1494	3482	3602	3419	2387	3028	2093	5811	3220	7285	8215	14829	13045	9735	15329	8922	6857	13296	14870	10632	14064	9811	7577	13742	14413	10316	14691	7663	5577	7178	3701	3437	1673	9399	2896	6080	3364
AT1G04080	Carubv10010956	CARHR003420	Thhalv10006844	3050	3592	5142	3526	3954	2975	2650	2155	3862	2595	2165	3262	3184	3823	3947	3849	3872	2438	2862	2155	1197	2568	3757	2583	2311	2390	2241	2310	2567	2172	2559	2218	2684	2328	3176	2251	3537	3742	4288	3302	3846	3750	2445	2085	3010	2926
AT1G04100	Carubv10010148	CARHR003440	Thhalv10008519	107	894	262	751	200	300	137	548	206	536	169	261	167	663	235	424	159	154	80	288	97	86	98	190	105	339	76	126	38	62	64	203	88	98	82	91	179	639	199	332	182	623	126	480	184	476
AT1G04110	Carubv10012040	CARHR003450	Thhalv10006861	61	100	144	37	129	35	72	105	100	73	24	52	114	168	81	79	78	49	83	83	97	65	102	47	13	53	101	66	46	30	70	77	87	38	78	46	118	89	248	110	83	33	112	91	165	103
AT1G04120	Carubv10008087	CARHR003470	Thhalv10006549	1506	3222	3144	3156	3815	4305	1191	1155	1942	1576	1500	3348	1687	3026	2625	3451	5544	2259	1831	1605	902	2138	3581	2593	1594	1671	1546	1598	1929	1628	1740	1494	1801	1441	2650	2021	628	621	1539	1130	1254	1776	334	393	915	227
AT1G04130	Carubv10011408	CARHR003480	Thhalv10008004	423	414	340	191	712	455	444	391	287	230	393	451	471	360	231	171	763	432	870	644	514	392	671	540	905	665	566	442	760	395	779	604	529	442	933	686	983	1070	564	528	841	1026	760	607	445	435
AT1G04140	Carubv10011722	CARHR003490	Thhalv10006848	2328	3137	3707	3591	2821	2595	1934	1943	2522	2807	1720	2605	2689	3207	3538	3891	3211	2175	3108	2560	1844	3541	3444	2918	1727	2200	2404	2476	1940	2653	2605	2391	3237	2460	2910	2763	3011	4711	3621	4055	4522	6157	2255	2578	2781	3151
AT1G04160	Carubv10008089	CARHR003500	Thhalv10006554	208	448	418	168	260	217	156	159	239	75	120	232	220	560	276	185	401	131	390	309	130	137	387	163	279	480	215	126	299	130	249	288	211	126	356	183	409	770	270	114	327	277	304	452	203	86
AT1G04170	Carubv10008849	CARHR003510	Thhalv10000157	3570	3522	5819	3751	6785	4145	4164	3300	4572	4310	5044	4268	4401	3603	3854	3775	5942	3795	4728	3594	4717	4456	5839	4950	7279	4937	5207	5512	6875	4013	4976	3865	5186	5322	5227	4837	4516	4675	5574	4306	5784	4594	3714	2892	4205	3281
AT1G04190	Carubv10009715	CARHR003520	Thhalv10008141	906	777	1552	872	1657	1095	1079	723	1185	916	1232	1244	1109	774	948	828	1507	921	636	465	921	518	886	710	903	597	625	583	1069	635	684	465	645	641	756	768	961	825	916	709	1150	1128	807	521	810	607
AT1G04200	Carubv10008423	CARHR003530	Thhalv10006925	620	1470	1084	937	828	844	496	907	909	757	571	782	770	1423	837	860	712	545	701	1236	842	585	1032	834	737	1648	758	590	837	581	603	1106	684	589	828	662	582	1610	723	712	888	1823	534	1307	566	497
AT1G04210	Carubv10008166	CARHR003540	Thhalv10006614	1672	2548	2920	1904	2779	1930	1136	1214	1951	1143	1469	1897	1683	2580	2486	2076	3196	1339	1998	1247	968	1453	3189	1630	1421	1375	1004	976	1563	1264	1614	1398	1290	990	1742	1387	3176	3406	3198	2477	4160	3783	2264	1957	2431	1954
AT1G04220	Carubv10008867	CARHR003550	Thhalv10007349	179	209	144	100	411	393	124	126	94	121	210	240	194	176	64	66	394	150	145	249	104	137	251	266	155	313	126	159	191	139	141	312	117	131	173	206	58	111	112	43	557	193	108	59	92	49
AT1G04240	Carubv10010367	CARHR003570	Thhalv10008636	700	641	750	203	1175	873	552	379	627	273	733	794	817	490	562	167	871	446	726	435	435	279	1081	776	668	421	432	302	930	435	644	417	468	251	734	461	155	130	185	43	259	98	188	59	115	32
AT1G04250	Carubv10010236	CARHR003580	Thhalv10008679	1295	1761	897	240	2013	1192	969	856	577	233	1039	1115	1291	1219	629	265	1864	947	2333	1594	2603	1593	4977	4182	2469	1552	1529	1412	3657	2686	2286	1566	1334	1274	4209	3916	864	1304	819	370	1380	852	1051	576	544	331
AT1G04260	Carubv10011583	CARHR003590	Thhalv10008893	483	477	608	553	541	506	451	544	498	660	344	431	448	452	377	447	387	466	337	351	265	300	211	254	262	287	368	321	164	258	274	294	380	344	247	260	316	432	348	339	312	411	319	263	248	322
AT1G04280	Carubv10012550	CARHR003610	Thhalv10007316	1244	1808	1342	2214	937	1732	1435	1369	1172	2189	771	1487	1039	1197	1222	2122	867	947	750	709	764	1157	1341	1374	811	851	817	1016	998	1153	804	579	740	816	940	1066	696	765	1374	1614	805	1145	610	345	1378	1274
AT1G04290	Carubv10010530	CARHR003620	Thhalv10008953	460	508	638	556	816	876	539	631	609	822	912	676	551	427	439	531	600	687	325	249	820	485	296	339	432	260	629	542	384	192	383	256	646	545	405	308	836	1028	1190	1101	660	619	876	658	1126	1075
AT1G04300	Carubv10012200	CARHR003630	Thhalv10006644	1806	2953	3083	3204	2387	2347	1726	1616	2421	2244	1281	2132	1951	2940	3145	3511	2679	1602	2592	2095	878	2789	2865	2383	1828	2113	1932	2144	1720	1976	2178	2097	2580	2094	2302	2156	2334	3298	2705	2922	3480	5027	1835	1766	2110	2442
AT1G04310	Carubv10008561	CARHR003640	Thhalv10007018	836	818	887	665	704	682	667	597	601	749	317	633	819	671	709	731	619	547	2070	1764	1068	1636	1458	965	1501	1296	1597	1624	1326	821	1368	1332	1823	1527	1515	1281	2030	3895	1964	2395	2780	3408	1558	1552	1213	2266
AT1G04330	Carubv10010725	CARHR003650	Thhalv10009178	31	21	19	11	66	12	19	17	13	3	17	15	39	21	6	8	48	23	32	55	18	15	73	55	13	28	10	18	67	33	16	13	8	9	52	33	3	5	6	3	6	2	4	6	3	2
AT1G04340	Carubv10010342	CARHR003660	Thhalv10008972	521	640	790	661	824	524	469	438	632	564	442	606	620	600	522	567	722	519	907	966	1113	676	712	759	1114	1153	898	937	1083	812	927	844	864	850	876	857	467	566	548	427	548	485	437	365	473	488
AT1G04360	Carubv10012007	CARHR003690	Thhalv10009604	161	275	111	109	120	109	101	119	74	45	57	110	139	205	100	127	104	58	23	25	21	22	36	19	33	24	27	8	26	23	17	26	28	46	29	15	43	109	43	16	40	49	22	68	18	17
AT1G04370	Carubv10011057	CARHR003700	Thhalv10009418	2	35	14	4	4	7	0	9	3	0	0	16	0	26	0	5	9	11	1	51	1	3	2	40	0	40	0	5	1	13	2	28	0	2	1	30	3	42	1	6	12	25	2	31	4	1
AT1G04380	Carubv10012463	CARHR003710	Thhalv10009937	1	5	7	0	8	3	5	0	0	0	0	3	5	4	2	0	1	1	0	0	0	0	2	1	1	2	0	0	0	0	0	0	0	0	0	0	16	16	37	6	8	18	11	21	4	1
AT1G04390	Carubv10012499	CARHR003720	Thhalv10006788	440	503	353	359	401	415	254	263	297	243	144	341	345	406	403	471	403	251	434	226	222	470	488	254	218	218	312	354	259	225	337	246	485	287	400	325	269	339	351	274	439	630	251	166	268	270
AT1G04400	Carubv10008610	CARHR003740	Thhalv10007081	2225	3704	5452	5209	1566	1679	1703	1717	3946	3183	884	2205	2241	3206	5949	6902	2296	1790	2969	1638	2660	4234	1543	1916	2091	1630	3300	3634	1333	1675	2339	1616	3639	2966	2492	2324	2775	2731	6055	5009	2726	3404	2286	1387	4424	4467
AT1G04420	Carubv10009108	CARHR003760	Thhalv10007737	2358	2403	3613	1891	2116	1472	1980	1841	3404	1666	1606	1498	2755	2405	3729	2381	1985	1210	6072	3238	4909	2731	3898	2105	3428	3149	4955	3168	3533	1636	4304	3675	5282	3304	4502	2689	2127	2280	2366	817	1563	1012	2080	1384	1560	853
AT1G04430	Carubv10011254	CARHR003770	Thhalv10007078	2603	2874	5620	1938	3115	2615	2339	1687	3809	1537	2301	2717	3733	3767	4216	2206	4188	1873	3656	3804	3060	2621	5430	2938	2774	3871	3886	2969	4411	2589	3425	3972	3313	2123	3993	2557	4676	5112	5128	2706	6540	3416	4314	3666	4258	1877
AT1G04440	Carubv10012017	CARHR003780	Thhalv10007554	2206	3736	2478	3132	1653	2192	2211	2132	2030	2109	989	2228	2183	2843	2455	3311	2319	1699	2750	4558	2100	2772	1038	1908	2160	5215	2244	2783	906	1766	2117	4229	2564	2631	1537	1957	2335	4962	2868	3616	2793	5267	2415	2987	2149	3407
AT1G04445	Carubv10011479	CARHR115370	Thhalv10009393	10	6	6	16	3	1	14	12	5	3	8	7	0	9	2	16	4	7	0	0	0	2	0	0	0	1	0	0	0	0	0	0	3	0	0	0	0	0	0	0	0	0	0	0	0	0
AT1G04450	Carubv10012323	CARHR003800	Thhalv10008832	0	0	0	0	0	0	0	0	0	5	0	0	0	0	0	0	0	0	0	0	2	2	0	3	0	0	2	0	0	0	2	0	5	2	0	0	0	0	0	0	0	0	2	0	0	0
AT1G04470	Carubv10012233	CARHR003810	Thhalv10006651	0	0	0	3	0	4	0	1	0	1	13	2	0	0	0	0	0	3	0	1	2	2	6	8	0	4	0	1	12	3	2	3	0	0	7	0	1	2	0	0	3	5	1	0	0	0
AT1G04500	Carubv10009410	CARHR003840	Thhalv10007843	3	35	46	31	16	7	5	11	27	20	6	16	13	36	14	35	6	5	21	39	11	10	12	10	15	22	14	5	4	6	13	40	15	22	3	7	10	6	25	35	42	71	12	6	7	37
AT1G04510	Carubv10008852	CARHR003850	Thhalv10007366	1478	1725	2714	1921	2813	1770	1805	1463	2288	2067	1922	2194	1818	1831	2067	2120	2635	1667	1742	1041	833	1582	2189	1443	1674	1323	1737	1506	1900	1413	1517	1126	1734	1601	1810	1414	1847	1934	2354	1744	2446	2758	1381	1227	1667	1620
AT1G04520	Carubv10009823	CARHR003860	Thhalv10008311	436	305	726	149	1248	714	406	233	590	160	673	802	620	439	312	134	994	553	384	138	310	189	543	319	446	207	331	182	520	258	345	175	270	186	439	313	669	557	377	283	636	203	424	352	310	153
AT1G04530	Carubv10009880	CARHR003870	Thhalv10008199	2197	3575	1256	1139	3772	3802	2048	2455	1211	1078	2640	3699	2449	2979	1144	1307	2936	2431	2158	811	613	418	2246	1391	874	649	467	405	1113	944	1396	1021	592	437	1977	1179	893	1429	948	1037	686	853	871	945	725	889
AT1G04540	Carubv10011922	CARHR003880	Thhalv10007144	2	5	3	3	6	4	0	16	5	3	0	4	0	37	5	4	2	5	0	0	0	0	0	0	0	0	0	0	0	0	0	0	0	0	0	0	4	4	0	0	2	3	0	0	0	2
AT1G04550	Carubv10009764	CARHR003890	Thhalv10008626	744	461	926	440	1694	1123	616	438	713	450	691	1157	852	452	654	421	1191	786	637	215	229	206	946	769	498	179	255	240	572	377	559	182	376	275	788	512	325	231	351	201	355	263	221	125	233	209
AT1G04555	Carubv10010566	CARHR003900	Thhalv10009014	144	206	213	239	188	252	221	171	173	264	124	219	161	173	156	276	189	193	257	200	236	204	246	240	385	223	224	313	247	188	279	199	238	261	253	253	115	136	103	82	78	96	106	77	106	98
AT1G04560	Carubv10012389	CARHR003910	Thhalv10009503	143	2	0	2	0	0	0	1	1	0	0	0	0	1	0	2	0	0	3	6	0	0	1	7	1	22	2	9	1	1	4	1	0	3	10	6	11	9	72	7	47	41	28	33	0	2
AT1G04570	Carubv10008801	CARHR003920	Thhalv10007302	19	30	35	10	221	129	0	6	22	12	97	93	21	23	20	17	209	95	47	71	25	11	453	192	32	54	22	13	483	183	31	49	7	16	100	99	9	3	4	8	38	30	3	8	1	4
AT1G04580	Carubv10011163	CARHR003930	Thhalv10006570	3	2	3	10	2	14	0	2	0	1	0	6	1	1	1	3	16	2	715	120	48	121	1489	654	349	111	113	84	731	388	411	129	154	102	1117	529	160	158	160	102	183	170	108	81	121	116
AT1G04590	Carubv10009357	CARHR003940	Thhalv10007965	805	587	963	654	1168	740	949	640	868	830	993	831	883	625	728	686	1042	720	587	315	402	434	657	537	634	358	518	546	614	351	545	366	584	623	509	422	499	432	347	278	501	311	389	246	295	234
AT1G04600	Carubv10012168	CARHR003950	Thhalv10006545	11	14	28	7	19	9	3	21	12	2	2	18	15	12	9	9	16	2	17	4	5	17	36	22	15	13	12	4	10	16	10	10	8	12	11	6	69	133	71	36	63	80	55	67	44	30
AT1G04610	Carubv10011757	CARHR003960	Thhalv10010013	75	70	123	16	165	19	66	36	79	51	75	45	64	68	71	30	89	41	11	21	10	19	30	19	19	61	21	8	28	29	15	20	12	8	23	21	67	64	52	76	75	34	26	24	17	30
AT1G04620	Carubv10011940	CARHR003970	Thhalv10007576	255	235	1838	993	387	237	287	202	1598	1062	222	250	224	245	1815	1385	365	217	389	155	1936	2660	628	387	298	247	3077	2500	416	256	393	158	3791	2511	539	356	611	536	1609	904	462	446	614	340	1194	995
AT1G04635	Carubv10010559	CARHR003990	Thhalv10009004	92	58	168	45	228	103	57	67	121	51	72	115	124	75	73	56	175	108	88	39	93	44	173	81	120	60	60	44	144	66	123	64	61	40	107	114	310	256	194	125	322	189	231	178	149	83
AT1G04640	Carubv10010053	CARHR004000	Thhalv10009297	784	582	1731	1124	1145	805	693	543	1700	1291	836	953	924	581	1944	1404	1083	723	1169	603	1311	1700	1596	1493	1065	572	1666	1879	1619	1076	1279	670	1951	1788	2228	1786	969	994	1560	1186	1060	1049	939	567	1281	1342
AT1G04645	Carubv10011016	CARHR181900	Thhalv10009662	0	0	0	1	1	0	0	0	0	0	0	4	0	0	0	0	1	1	1	3	0	0	1	3	8	0	3	4	2	3	2	0	1	2	3	0	2	1	0	0	0	0	1	0	1	0
AT1G04650	Carubv10008197	CARHR004030	Thhalv10006668	46	43	99	50	127	80	60	34	79	39	89	93	66	57	109	61	112	35	134	30	118	68	73	71	89	54	111	52	92	46	90	36	101	85	118	54	96	78	368	152	183	108	86	44	268	78
AT1G04670	Carubv10012332	CARHR004050	Thhalv10009113	0	0	0	0	5	0	0	0	1	0	0	0	0	0	0	0	0	0	0	0	0	0	0	0	0	1	0	0	0	0	1	0	0	0	0	0	0	0	0	0	0	0	0	0	0	0
AT1G04690	Carubv10009717	CARHR004070	Thhalv10008181	2350	2853	3933	3319	3205	2994	2579	2278	3110	2918	2332	3148	2780	2856	3183	3997	3245	2727	1992	1587	1454	1969	1713	1845	2151	1562	2103	2324	1877	1522	2083	1388	2149	2008	1977	1769	2206	2665	3653	4092	2297	2943	2388	1755	2998	3428
AT1G04700	Carubv10011648	CARHR004080	Thhalv10006649	51	104	114	43	121	73	50	45	59	35	38	86	58	121	81	78	106	36	2	7	6	8	10	17	13	4	11	1	9	6	12	6	10	3	14	1	34	78	83	19	70	70	25	40	28	13
AT1G04730	Carubv10008278	CARHR004120	Thhalv10006720	202	168	339	241	436	163	123	129	289	156	321	257	255	162	246	257	374	135	342	115	308	251	411	226	257	137	463	277	414	155	224	121	344	203	466	222	233	182	395	288	322	175	187	113	301	121
AT1G04750	Carubv10010251	CARHR004130	Thhalv10008733	2159	3270	3693	3469	2853	2971	2428	2966	3304	3819	2121	3071	2706	2967	2656	3221	2817	2682	3073	3195	5030	2629	2578	2977	3642	3664	3686	3644	3341	2563	3116	2745	3638	3349	2905	2905	2349	3019	2722	3229	3315	4083	2187	1996	2428	2606
AT1G04760	Carubv10012187	CARHR004140	Thhalv10008729	48	49	99	27	47	14	61	47	107	30	61	48	82	42	46	17	16	29	86	45	76	34	55	44	31	60	95	56	54	14	23	35	102	62	51	15	23	14	29	3	12	16	17	16	12	8
AT1G04770	Carubv10009848	CARHR004150	Thhalv10008052	215	238	1955	929	1304	2780	159	256	766	696	611	992	206	248	766	815	961	929	788	476	2368	2560	1453	2342	503	507	2822	3472	954	1465	499	449	2093	2818	1964	2493	393	239	1031	1273	1104	1333	121	116	948	1070
AT1G04780	Carubv10008526	CARHR004170	Thhalv10007017	937	2762	2320	2803	1434	1606	794	1189	1732	1534	581	1552	1089	2298	2356	2784	1717	1135	1443	2016	963	1798	1558	1646	1189	2242	1579	1545	1240	1266	1239	1731	1675	1482	1249	1385	1277	3179	1915	2268	2470	4181	1147	2259	1555	1929
AT1G04790	Carubv10008582	CARHR004180	Thhalv10007101	618	902	1043	859	640	672	564	582	821	633	244	668	724	863	920	986	718	434	917	783	593	1014	767	713	690	761	984	1025	544	572	722	714	1166	935	773	619	562	649	880	619	867	878	508	400	577	642
AT1G04820	Carubv10008014	CARHR040120	Thhalv10020718	12127	10310	14129	5920	12277	7398	12726	10842	11423	7614	12230	9638	13607	11124	7339	5417	10096	7999	4954	4534	4420	2555	3896	2060	1985	4024	3567	1977	3118	2967	3018	3217	2956	1896	3599	2362	27445	34689	21137	19870	21266	14109	25633	20115	18881	17532
AT1G04830	Carubv10009123	CARHR004220	Thhalv10007609	554	635	653	658	533	488	530	527	560	567	469	504	599	655	586	591	515	398	531	525	301	606	517	621	615	616	569	701	580	440	530	514	677	712	542	614	530	780	624	620	794	1107	482	512	436	633
AT1G04840	Carubv10008505	CARHR004230	Thhalv10007007	21	31	76	38	20	36	8	19	64	11	14	32	27	37	62	69	50	15	60	47	49	57	91	56	24	48	55	30	33	25	33	54	81	65	56	42	70	62	118	75	139	63	37	62	83	65
AT1G04850	Carubv10011080	CARHR004240	Thhalv10007758	2873	3151	3904	3542	3684	3447	3999	3028	3414	4876	3926	3419	3146	2750	2689	3832	3301	2813	2269	1549	1998	2079	1949	1960	3014	1845	2365	2990	2424	1625	2390	1655	2398	2502	2382	2055	2673	3288	3097	3127	3501	3844	2319	1973	2679	3046
AT1G04860	Carubv10008214	CARHR004250	Thhalv10006716	719	1539	1653	1657	1293	1102	611	612	1196	898	630	1104	894	1357	1771	1850	1741	746	934	782	616	1056	1370	806	804	855	760	702	854	630	831	811	973	711	761	726	1046	1023	1623	1107	1676	1664	784	575	1096	914
AT1G04870	Carubv10009430	CARHR004260	Thhalv10013798	1160	1087	2390	1145	2430	1277	1224	994	1823	1414	1557	1519	1329	1137	1357	1131	2209	1278	1417	1028	1339	1078	2263	1641	1800	1481	1502	1193	2101	1079	1306	1079	1214	1227	1487	1340	1572	1286	1677	973	1483	745	1004	803	1361	740
AT1G04880	Carubv10010835	CARHR004270	Thhalv10007631	4	22	24	7	68	11	3	17	14	4	27	8	28	25	9	12	36	16	3	3	1	0	2	6	1	2	1	4	2	1	1	3	0	0	1	2	44	29	40	12	41	22	28	27	27	10
AT1G04890	Carubv10011320	CARHR004280	Thhalv10009864	0	0	3	0	0	0	0	0	0	0	0	0	0	0	0	0	0	0	0	0	0	0	0	0	0	0	0	0	0	0	0	0	0	0	0	0	0	3	2	2	16	33	0	2	1	0
AT1G04900	Carubv10011212	CARHR004300	Thhalv10007628	497	418	883	443	688	380	425	474	774	480	572	454	691	494	627	492	640	332	549	333	600	380	822	418	565	438	447	430	616	338	550	440	539	380	559	396	1095	1060	822	746	1210	1037	632	675	746	550
AT1G04910	Carubv10008864	CARHR004310	Thhalv10007374	889	1178	1153	1045	1086	1052	834	842	878	874	715	1113	1113	1016	893	1025	990	817	980	870	715	916	900	900	1151	831	922	946	983	827	993	679	859	817	977	886	1351	1691	1431	1851	1589	1985	1176	871	1331	1403
AT1G04920	Carubv10008160	CARHR004320	Thhalv10006639	37	39	81	36	76	57	45	28	35	12	56	54	29	66	49	37	52	49	64	132	16	40	92	84	36	116	33	45	52	54	65	128	33	37	44	58	312	526	216	168	382	368	221	218	162	160
AT1G04945	Carubv10011153	CARHR004350	Thhalv10007024	284	380	673	456	817	590	276	223	517	387	475	665	351	356	506	468	770	526	3431	2001	3902	2913	3236	2204	2499	1950	3136	2952	2619	1845	2566	1867	3476	2928	2846	2425	601	483	606	313	1130	941	385	267	517	254
AT1G04950	Carubv10008770	CARHR004360	Thhalv10007291	833	669	943	637	637	561	683	705	855	683	432	651	788	624	906	807	699	504	644	407	287	664	514	436	541	420	570	670	392	289	489	374	752	696	525	380	332	357	444	398	477	528	281	204	333	293
AT1G04960	Carubv10012006	CARHR004370	Thhalv10008218	840	1467	1082	1321	1031	1220	920	1239	922	1353	825	992	901	1194	949	1193	1021	777	489	931	539	755	647	938	624	921	543	766	495	607	567	838	702	671	494	719	949	1651	1394	1617	1538	2133	975	1049	1149	1737
AT1G04970	Carubv10008924	CARHR004380	Thhalv10007436	796	1489	1158	1783	984	1478	732	753	856	921	468	1046	1031	1288	1350	2035	1182	854	701	391	626	748	573	644	427	441	626	704	413	454	616	421	765	669	618	600	591	707	506	601	601	929	503	345	453	597
AT1G04980	Carubv10012209	CARHR004390	Thhalv10007682	866	1345	1322	2716	1052	1177	1006	1015	1202	1823	684	1415	1130	988	820	2532	1475	1396	476	615	678	624	368	573	1006	765	520	707	445	424	375	304	305	484	410	652	1935	2646	936	1434	486	626	1232	1357	1015	1202
AT1G04985	Carubv10012011	CARHR004400	Thhalv10008833	1173	1578	1612	1578	1269	1344	1406	1504	1378	1689	1009	1341	1415	1380	1320	1403	1247	1194	513	445	607	905	565	489	465	466	630	780	432	464	447	468	619	596	430	492	453	565	530	376	463	516	428	376	455	415
AT1G04990	Carubv10009335	CARHR004410	Thhalv10007912	119	261	827	783	333	323	171	240	660	699	222	318	204	243	817	819	369	225	35	31	67	74	82	88	37	54	115	98	64	47	38	32	141	62	67	54	220	305	170	164	566	636	139	196	185	124
AT1G05010	Carubv10009749	CARHR004440	Thhalv10008207	9934	27869	17883	17911	9264	10736	8413	14823	15149	13289	4882	12854	12788	20069	18706	20586	12008	11545	11031	20601	7580	2752	13355	8448	5836	21211	4356	2500	7187	4755	7227	18505	3850	2237	9880	5470	2914	6335	5837	6577	4424	7698	4023	4043	6012	4862
AT1G05020	Carubv10008537	CARHR004450	Thhalv10007033	57	199	94	95	23	42	62	99	102	98	18	29	66	179	156	111	34	35	5	17	5	6	5	2	6	39	10	3	0	1	4	43	1	3	9	3	97	368	156	203	77	117	121	255	140	155
AT1G05040	Carubv10011812	CARHR004490	Thhalv10009951	0	0	1	0	0	2	0	1	0	0	0	0	0	0	1	0	0	0	0	0	0	0	0	0	0	0	0	0	0	1	0	0	0	0	0	0	6	10	14	15	8	12	8	3	31	39
AT1G05055	Carubv10009246	CARHR004500	Thhalv10007730	329	297	571	332	483	329	358	265	410	365	215	371	380	279	350	408	478	350	378	207	301	427	390	413	333	255	413	421	364	299	380	242	428	373	334	371	178	191	225	160	360	321	132	118	146	114
AT1G05060	Carubv10010084	CARHR004510	Thhalv10008572	408	598	570	722	605	1476	342	403	469	782	387	794	438	369	487	617	468	686	499	573	732	579	494	771	546	610	481	644	489	679	496	501	532	517	580	799	495	667	566	471	684	1135	419	377	451	518
AT1G05065	Carubv10010777	CARHR004530	Thhalv10009388	34	25	54	29	37	33	27	19	44	23	22	55	42	30	41	32	33	32	23	39	27	14	57	61	42	50	35	12	55	14	35	23	37	33	29	28	0	0	0	0	0	0	0	0	0	0
AT1G05080	Carubv10011452	CARHR175950	Thhalv10003402	0	0	0	0	0	0	0	0	0	0	0	0	0	0	0	0	1	0	0	0	0	0	0	0	0	0	0	0	0	0	0	0	0	0	0	0	0	0	0	0	0	0	0	0	0	0
AT1G05100	Carubv10009674	CARHR004560	Thhalv10008116	7	6	25	67	34	15	2	9	15	24	15	15	13	13	11	15	17	9	6	7	6	4	16	11	2	10	4	4	11	2	6	5	3	5	11	6	3	8	4	0	25	9	1	7	3	1
AT1G05120	Carubv10008314	CARHR004580	Thhalv10006803	629	904	1131	1135	806	773	654	711	803	1212	582	809	683	808	886	1129	813	494	1130	847	516	1150	1614	1446	1173	968	986	1146	1196	953	1010	849	948	1120	1148	1090	1430	1837	1901	1681	2109	2733	1010	1133	1370	1209
AT1G05160	Carubv10008960	CARHR004620	Thhalv10009356	332	297	468	351	451	277	263	238	442	289	214	313	438	256	400	361	277	211	175	84	127	140	232	108	139	82	130	115	155	87	151	74	200	125	248	149	895	791	963	726	749	626	719	491	706	632
AT1G05180	Carubv10008715	CARHR004640	Thhalv10007362	860	1098	1686	1448	1292	1094	906	911	1473	1608	796	1208	943	983	1523	1735	1270	916	1022	709	1063	1086	1208	1146	1177	987	1094	1138	1334	876	1012	891	1278	1294	1170	1106	961	1074	1247	1144	1335	1287	898	629	947	1155
AT1G05190	Carubv10010237	CARHR004660	Thhalv10008693	12746	9504	15407	7933	10433	6554	12004	10765	15162	10357	7978	7054	13220	9284	13099	8983	6736	5802	15653	9369	10736	6762	9013	5386	9626	8923	11059	7849	8518	3247	10307	9175	11762	8426	9851	5429	10892	12401	11281	4355	7065	3941	11874	7169	8086	5575
AT1G05200	Carubv10008205	CARHR004670	Thhalv10006709	1222	759	1010	744	1468	1116	1040	543	690	477	902	1098	1240	892	867	820	1577	741	988	273	558	895	1105	840	576	224	813	746	751	647	738	272	1201	666	1116	872	511	266	238	207	546	355	337	138	163	179
AT1G05205	Carubv10010747	CARHR004680	Thhalv10009219	576	496	780	458	785	623	906	669	793	770	804	644	637	418	373	454	436	461	512	489	630	487	415	610	840	585	603	776	643	390	562	486	635	721	503	571	433	559	535	607	424	337	390	299	460	576
AT1G05210	Carubv10010479	CARHR004690	Thhalv10008934	200	225	246	118	228	90	200	166	218	130	126	178	255	148	123	98	132	121	139	124	272	85	157	114	214	143	177	138	147	90	118	115	183	168	153	119	1250	1615	1491	1666	1361	1184	1255	778	1273	1718
AT1G05230	Carubv10008621	CARHR004700	Thhalv10006934	650	555	980	676	740	559	456	421	811	569	365	504	625	719	724	694	579	397	568	335	493	457	880	543	521	385	516	427	475	465	492	415	616	358	631	586	694	520	747	356	927	859	701	318	499	261
AT1G05250	Carubv10012652	CARHR004710	Thhalv10008202	0	1	4	0	6	0	0	1	0	2	0	0	1	7	2	0	2	3	7	119	539	52	279	75	143	82	243	54	155	26	88	114	130	44	125	19	119	728	265	60	287	90	185	272	177	99
AT1G05260	Carubv10009829	CARHR004730	Thhalv10008189	806	858	1436	864	1730	1391	738	443	1010	817	1570	1078	670	424	1235	1016	2196	759	284	200	531	286	485	283	576	311	376	289	375	252	420	259	372	354	436	250	439	441	450	306	648	580	295	183	328	294
AT1G05270	Carubv10012564	CARHR004740	Thhalv10007929	969	1133	1428	1393	1371	1192	1074	976	1262	1486	873	1196	1080	1013	1250	1515	1438	944	1377	1360	1412	1734	1332	1575	1643	1631	1747	2103	1291	1101	1300	1290	1860	1985	1150	1327	1073	1387	1190	1046	1392	1275	976	805	905	1084
AT1G05280	Carubv10012119	CARHR004750	Thhalv10009924	19	40	47	21	57	18	29	6	30	12	9	36	19	32	35	17	43	17	53	20	6	24	25	39	27	34	18	17	29	17	34	18	27	26	13	40	2	1	2	1	2	4	4	2	0	0
AT1G05290	Carubv10011948	CARHR004770	Thhalv10009385	0	0	0	0	0	0	0	0	0	0	0	0	2	0	0	0	0	0	0	0	0	0	0	0	0	0	0	0	0	0	0	0	0	0	0	0	0	0	0	0	0	0	0	0	0	0
AT1G05291	Carubv10011853	CARHR004780	Thhalv10008905	0	0	0	0	0	0	0	0	0	0	0	0	0	0	0	0	0	0	0	0	0	0	0	0	0	0	0	0	0	0	0	0	0	0	0	0	14	12	56	26	5	6	15	1	17	52
AT1G05300	Carubv10009542	CARHR004790	Thhalv10008057	80	874	251	980	188	934	72	369	236	558	109	614	129	687	157	1202	166	631	211	5252	830	4929	2119	4944	684	3729	1977	5647	2078	5182	344	3079	1491	5987	525	3641	359	5502	578	2723	2251	5275	319	3870	815	1851
AT1G05310	Carubv10011085	CARHR004800	Thhalv10009800	10	51	39	8	8	8	15	17	24	10	4	7	35	60	32	14	23	7	1	23	23	91	12	255	0	28	33	192	10	344	0	5	20	166	2	78	2	23	11	10	5	20	6	4	2	6
AT1G05320	Carubv10011474	CARHR004810	Thhalv10006865	249	698	833	481	383	456	263	255	639	474	222	450	385	526	763	660	552	215	478	1759	1555	2068	1075	1508	712	1607	1148	1716	654	1284	673	1522	1088	1619	641	1056	1170	3769	1886	2620	2563	4948	933	2295	1586	2417
AT1G05330	Carubv10012259	CARHR004820	Thhalv10009852	2	7	0	0	3	2	0	7	0	2	0	1	3	6	0	0	3	2	2	17	1	0	0	9	0	15	6	2	2	5	4	14	0	9	0	2	2	2	2	2	2	8	0	6	4	4
AT1G05350	Carubv10009195	CARHR004850	Thhalv10007699	1046	1779	1476	1308	1140	1158	1395	1635	1231	1668	1213	1125	1178	1486	1070	1240	1014	953	1346	1058	831	1265	859	821	1525	1148	1426	1533	958	717	1056	866	1402	1309	923	772	1432	2284	1764	2041	1651	2256	1247	1300	1321	1568
AT1G05360	Carubv10009268	CARHR004870	Thhalv10007747	584	428	535	419	651	579	437	382	438	340	400	585	590	448	349	430	556	408	326	326	411	228	296	259	326	326	285	247	254	231	303	248	265	280	299	251	198	276	179	154	298	303	175	148	155	142
AT1G05370	Carubv10009204	CARHR004880	Thhalv10007749	29	86	70	33	68	44	33	94	65	22	46	48	26	72	60	23	21	38	27	88	19	22	50	48	20	78	31	17	32	41	23	75	24	24	46	27	29	36	58	17	37	16	23	12	26	26
AT1G05380	Carubv10008137	CARHR004890	Thhalv10009713	934	2419	1727	1824	1032	1128	631	934	1161	813	731	1030	1055	2226	2055	2073	1958	764	2057	1578	859	1568	1650	1074	1291	1631	1189	1040	904	757	1462	1581	1534	1243	1498	1092	1730	2120	1937	1686	2013	2566	1255	1292	1486	1176
AT1G05385	Carubv10011658	CARHR004900	Thhalv10008840	615	413	702	378	580	461	728	502	677	452	442	478	710	344	544	426	518	518	602	156	526	442	779	478	527	232	561	491	695	364	515	222	565	434	676	561	321	217	292	123	247	252	353	153	223	126
AT1G05410	Carubv10009042	CARHR004920	Thhalv10007544	584	548	819	576	671	450	548	500	658	575	392	481	680	554	633	595	679	451	1109	690	919	1034	1147	1182	1328	842	1116	1193	996	736	1074	679	1348	1161	906	1005	439	458	620	528	471	392	372	285	447	495
AT1G05420	Carubv10010861	CARHR004910	Thhalv10009912	24	49	27	7	22	9	18	34	25	6	6	25	16	66	18	9	16	15	20	9	5	16	18	18	14	1	13	9	20	11	8	2	26	20	18	16	2	2	6	0	13	2	1	2	0	1
AT1G05430	Carubv10010009	CARHR205340	Thhalv10008449	659	727	1006	941	971	792	592	602	869	826	612	897	861	797	856	1055	931	749	709	507	648	564	572	578	606	483	664	545	502	434	624	495	783	651	597	543	612	585	811	570	575	655	557	341	675	586
AT1G05440	Carubv10012616	CARHR004930	Thhalv10002568	52	45	97	47	66	21	49	52	103	46	82	40	72	62	45	17	42	24	87	32	51	28	39	30	31	30	58	43	42	22	36	23	40	44	39	26	74	55	43	17	16	12	51	21	24	29
AT1G05450	Carubv10010889	CARHR004940	Thhalv10008963	2	14	9	6	3	12	0	8	1	8	1	9	0	8	3	8	3	9	19	71	4	41	9	58	17	47	13	23	29	55	42	47	14	47	25	46	0	1	0	0	0	1	0	0	0	0
AT1G05460	Carubv10008170	CARHR004950	Thhalv10006684	409	246	530	235	403	225	463	196	434	322	406	286	455	227	401	329	469	244	878	387	387	564	765	425	873	409	722	638	623	310	733	335	847	736	727	448	753	523	876	600	547	355	648	294	696	493
AT1G05470	Carubv10008606	CARHR004960	Thhalv10007110	503	444	545	280	490	239	417	249	465	235	380	363	415	366	425	259	342	182	601	288	277	313	498	435	458	318	380	340	387	264	414	265	303	309	410	290	335	231	302	252	369	263	272	144	166	207
AT1G05490	Carubv10008086	CARHR004970	Thhalv10010079	2	10	19	6	25	16	0	7	39	4	7	21	27	18	16	8	15	12	12	5	9	3	14	0	9	14	6	13	10	7	6	0	7	5	7	6	35	130	44	20	95	77	27	59	33	28
AT1G05500	Carubv10010976	CARHR004980	Thhalv10007226	1252	1864	1758	1468	1421	1468	1513	1378	1425	1445	1003	1308	1605	1653	1385	1592	1473	1057	1756	1138	2019	1823	1591	1255	1694	1297	1892	1761	1523	1026	1645	1145	1882	1650	1681	1296	1235	1380	1239	967	1018	861	1091	852	930	915
AT1G05510	Carubv10010839	CARHR004990	Thhalv10009707	3	0	0	0	1	0	0	0	0	0	0	0	0	0	0	0	1	0	9	19	3	2	10	14	12	23	0	9	9	5	12	10	0	12	8	5	26	10	84	4	82	47	26	29	5	7
AT1G05520	Carubv10011838	CARHR005000	Thhalv10006857	897	1355	1790	1571	1412	1323	946	855	1320	1194	990	1362	1097	1298	1475	1854	1859	1025	529	373	251	523	549	575	504	514	463	528	504	499	522	302	579	572	530	593	2357	2876	2508	2881	3135	4154	1602	1712	2187	2208
AT1G05540	Carubv10011245	CARHR005020	Thhalv10009821	120	52	53	17	153	111	104	79	52	23	125	107	117	55	37	21	107	91	0	0	0	1	0	0	0	2	0	2	0	0	0	0	0	0	0	0	58	35	83	37	80	57	49	16	53	29
AT1G05560	Carubv10009073	CARHR005030	Thhalv10007593	439	595	3006	2716	4258	1093	454	342	2074	2147	1329	1363	598	520	3262	2853	3968	1158	455	115	2045	1082	1551	480	199	82	1168	534	729	176	645	262	1744	967	1372	627	432	1563	3649	1860	5554	5509	1368	1052	1761	2533
AT1G05570	Carubv10012675	CARHR005040	Thhalv10006528	1003	1417	2838	1924	1612	1277	1062	647	1899	1406	865	1368	1458	1353	3484	2852	2467	810	875	599	1488	3084	1974	1331	874	791	2229	1909	864	821	794	804	2295	1648	1084	956	1712	2070	3335	2176	2227	1978	1236	1130	2195	1691
AT1G05577	Carubv10011656	CARHR005070	Thhalv10009387	11	12	7	5	17	10	3	6	3	4	35	17	14	7	7	3	7	5	8	9	1	2	3	1	0	9	0	7	1	2	0	5	0	3	0	4	5	20	3	4	15	20	5	12	4	6
AT1G05580	Carubv10011346	CARHR005080	Thhalv10006774	0	0	0	0	0	1	0	0	0	0	0	0	0	0	0	0	1	0	0	0	0	0	0	1	0	0	0	0	0	0	0	0	0	0	0	0	0	0	0	0	0	2	1	0	0	1
AT1G05590	Carubv10011603	CARHR005090	Thhalv10007179	417	336	566	279	422	380	387	242	460	304	276	398	451	350	344	294	327	285	333	160	216	264	222	165	326	216	396	276	259	156	284	169	352	283	293	200	285	269	920	444	302	252	284	209	670	347
AT1G05600	Carubv10012229	CARHR005100	Thhalv10007424	295	157	260	216	215	249	194	142	257	158	125	181	345	210	286	299	224	136	207	51	181	115	160	92	121	69	147	130	154	95	132	74	145	113	167	107	489	315	321	314	452	461	371	138	352	322
AT1G05610	Carubv10009001	CARHR005110	Thhalv10009542	22	24	21	15	40	15	20	10	12	24	0	18	14	14	15	28	18	14	12	23	10	11	10	9	6	4	9	2	2	3	6	14	5	3	5	9	7	25	11	14	12	17	4	2	7	4
AT1G05620	Carubv10009769	CARHR005120	Thhalv10008223	397	435	768	454	571	328	389	317	607	251	362	392	427	411	425	340	470	263	1414	1433	2729	3066	1324	1311	1382	1398	2992	2779	1245	1114	1194	1359	3395	3144	1248	1293	753	857	1295	1586	703	864	749	544	1111	1521
AT1G05630	Carubv10008138	CARHR005130	Thhalv10006606	496	587	664	411	541	545	363	379	507	356	393	755	463	791	483	379	542	445	169	825	296	417	194	270	248	1109	535	348	139	157	164	822	492	352	160	198	389	412	341	150	364	357	236	232	233	120
AT1G05650	Carubv10011292	CARHR005170	Thhalv10007830	12	25	10	5	83	43	10	14	17	9	54	47	22	36	10	8	121	21	0	0	2	2	6	5	15	10	2	7	6	7	3	0	2	1	19	1	6	26	0	3	38	16	8	6	0	3
AT1G05670	Carubv10008426	CARHR005190	Thhalv10010012	253	648	378	308	529	347	128	250	269	114	136	326	251	763	355	287	468	208	239	401	73	177	261	333	187	706	138	132	211	136	183	541	223	178	249	157	236	253	204	149	196	227	142	144	149	84
AT1G05680	Carubv10009096	CARHR005200	Thhalv10007603	292	1154	2983	3114	3023	1675	201	393	2358	1868	1029	2150	252	533	2810	1651	2519	1589	484	4157	2109	1142	1997	2350	1042	4728	1175	655	634	1612	812	6098	1008	825	1358	2956	122	427	561	119	1541	2546	125	1015	286	172
AT1G05690	Carubv10009329	CARHR005210	Thhalv10007799	68	39	82	44	290	480	99	36	47	20	158	230	92	45	57	71	253	150	596	1350	610	423	1155	1104	366	1417	321	292	632	700	415	1206	313	265	973	737	96	181	213	318	343	611	131	173	155	327
AT1G05700	Carubv10011047	CARHR054170	Thhalv10006777	108	518	399	1447	264	1823	90	209	248	641	219	1037	219	402	338	1262	294	553	197	3237	433	10226	1683	18534	990	4359	3262	18721	1112	12862	259	1900	1988	10810	431	5971	10	27	18	9	6	107	9	39	10	21
AT1G05710	Carubv10010563	CARHR005230	Thhalv10009016	292	531	441	371	605	590	357	444	393	291	437	546	314	397	269	354	403	453	59	107	132	97	194	208	75	103	129	135	133	99	95	83	103	154	123	139	119	283	129	230	304	526	103	197	137	274
AT1G05720	Carubv10010380	CARHR005240	Thhalv10008926	567	602	1047	904	882	860	876	628	953	1033	611	795	770	536	685	796	674	590	1373	1271	2401	1402	1265	1762	2447	1589	2111	2313	1694	1115	1679	1262	1923	2098	1484	1517	1052	1058	1088	1196	1228	1258	970	657	973	1223
AT1G05730	Carubv10010564	CARHR005250	Thhalv10009017	71	76	155	87	175	93	84	102	131	125	109	124	85	90	68	80	123	101	62	63	183	104	294	196	169	94	116	107	212	110	133	71	133	138	133	153	550	506	470	291	603	426	394	345	407	242
AT1G05750	Carubv10011161	CARHR005270	Thhalv10009524	181	195	408	264	155	141	125	129	305	152	78	141	171	207	314	322	192	126	128	82	120	117	171	85	84	63	105	61	107	68	109	86	129	108	125	91	145	179	250	107	173	93	113	99	188	76
AT1G05760	Carubv10010372	CARHR005260	Thhalv10008892	42	94	75	46	53	45	41	28	28	37	31	17	38	52	59	95	50	17	34	63	51	36	66	63	27	37	49	36	34	30	29	48	61	39	53	50	55	87	91	81	43	47	23	35	32	55
AT1G05785	Carubv10010613	CARHR005300	Thhalv10009079	231	235	251	295	378	261	269	302	295	509	279	285	243	174	225	198	244	253	311	482	423	347	282	454	581	573	415	640	360	293	393	431	518	589	297	418	271	306	225	266	382	462	221	208	224	358
AT1G05790	Carubv10011376	CARHR005310	Thhalv10006938	544	644	1006	989	444	639	467	458	885	824	275	561	682	638	1099	1206	579	435	554	502	367	783	462	391	501	558	664	682	301	312	459	521	841	638	383	371	331	462	626	466	295	365	335	245	456	469
AT1G05800	Carubv10010888	CARHR005320	Thhalv10009478	0	1	0	0	0	6	0	0	0	0	0	0	0	1	0	0	0	0	0	14	0	0	0	1	0	6	0	0	0	0	0	10	0	0	0	1	0	6	0	0	0	2	0	3	0	0
AT1G05805	Carubv10009382	CARHR005330	Thhalv10008050	589	968	1017	938	446	690	596	662	926	788	287	645	599	810	789	883	291	393	647	502	415	540	796	1564	725	459	602	724	579	980	549	333	652	539	648	946	341	495	988	984	832	1266	335	232	760	846
AT1G05810	Carubv10010263	CARHR005340	Thhalv10008743	365	392	530	358	283	268	478	281	462	381	125	232	456	324	393	343	213	129	140	70	158	98	152	126	170	97	136	111	159	112	193	83	149	73	169	129	62	120	127	71	106	67	72	60	100	68
AT1G05820	Carubv10008828	CARHR005350	Thhalv10007296	107	179	127	118	162	169	71	109	104	137	65	106	108	196	110	124	115	107	205	194	170	225	299	179	152	219	177	167	208	109	185	147	254	220	296	209	119	211	132	101	109	99	115	125	113	95
AT1G05830	Carubv10008150	CARHR005360	Thhalv10006646	1238	1401	1933	1549	1250	1172	1071	1072	1482	1222	738	1260	1442	1510	1810	1710	1284	759	1028	578	295	617	941	758	805	642	600	630	741	521	835	639	709	562	804	679	703	716	525	416	647	548	494	399	408	368
AT1G05835	Carubv10011930	CARHR005380	Thhalv10009110	318	176	198	69	454	185	320	277	167	233	416	314	228	175	63	81	164	293	135	85	88	41	97	97	98	77	87	53	116	44	106	64	94	69	134	93	45	29	36	6	29	19	21	17	10	4
AT1G05840	Carubv10008865	CARHR005370	Thhalv10007469	1159	1138	1121	1380	810	864	1296	1053	1087	1353	755	871	1261	978	1184	1285	696	594	789	1120	599	607	430	669	748	1235	725	799	402	348	687	1016	750	603	569	532	601	754	772	743	555	752	504	394	533	837
AT1G05850	Carubv10009762	CARHR005390	Thhalv10008219	8352	10550	12004	4581	9615	7100	9115	7301	10074	4587	7698	7003	9974	9785	8465	5137	9130	6042	21260	19643	10394	8532	21234	14551	18793	15372	15216	10011	19611	11331	20592	16424	12327	7908	23595	13438	6532	10016	10123	5801	7774	4764	7796	5556	8908	4142
AT1G05860	Carubv10009960	CARHR005400	Thhalv10008336	337	251	294	269	333	301	313	227	249	203	203	299	344	227	260	250	371	237	418	316	177	314	258	341	395	282	275	387	253	220	358	369	432	326	371	337	453	520	376	400	612	820	334	256	299	407
AT1G05870	Carubv10010453	CARHR005410	Thhalv10008864	749	351	485	219	1847	998	719	336	430	146	972	1038	576	421	292	217	1148	833	1221	1520	285	395	1176	1136	1256	1471	541	496	898	715	1013	1109	569	601	1214	1088	199	196	163	129	493	291	207	89	97	70
AT1G05880	Carubv10008969	CARHR005420	Thhalv10009394	25	176	12	81	24	114	5	28	25	40	10	46	17	40	11	46	3	26	178	7018	187	72	173	795	700	12856	66	104	94	256	53	5466	35	142	87	413	9	218	47	78	126	747	12	161	16	34
AT1G05894	Carubv10011325	CARHR005430	Thhalv10009329	7	18	24	13	46	26	12	12	11	15	6	31	10	11	16	10	35	23	6	201	15	77	71	154	33	153	20	65	69	133	8	250	18	84	13	117	42	94	34	38	153	288	52	56	29	46
AT1G05900	Carubv10012090	CARHR005460	Thhalv10007955	410	334	410	350	843	829	550	381	387	407	647	620	571	289	294	292	602	453	589	615	251	319	329	398	543	624	342	401	334	350	429	456	423	355	450	295	329	329	392	343	143	146	273	175	293	283
AT1G05910	Carubv10008115	CARHR005470	Thhalv10006586	887	1161	1355	983	1379	994	728	653	996	806	886	1132	955	1130	978	1050	1717	756	1450	1005	529	1266	1866	1199	1341	993	999	1144	1406	1138	1127	1053	1131	1159	1488	1133	1886	2662	1736	1664	2646	3327	1151	1472	1349	1265
AT1G05940	Carubv10003609	CARHR248030	Thhalv10028547	778	933	1251	1098	879	962	749	755	899	909	526	947	897	809	1151	1333	921	751	556	285	383	602	615	487	422	261	522	513	464	413	508	211	620	514	644	500	1356	1627	1780	1733	1251	1602	1327	857	1394	1865
AT1G05950	Carubv10008604	CARHR005480	Thhalv10007042	180	116	334	118	322	73	186	138	308	103	201	220	198	115	214	109	186	95	55	129	88	53	36	82	71	201	101	54	32	26	28	130	84	52	24	40	1	0	2	0	0	1	0	0	1	0
AT1G05960	Carubv10008206	CARHR005490	Thhalv10006704	1501	2764	2818	3247	1673	1482	1076	1514	2168	2193	1062	1483	1410	2295	3160	2857	1715	976	2129	1883	1050	1978	1674	1048	1556	1665	1849	1649	1073	939	1909	1774	2243	1406	1551	1184	1670	2056	2089	1461	1908	2044	1284	1187	1445	1153
AT1G05970	Carubv10010117	CARHR005500	Thhalv10008811	309	163	238	150	176	100	386	267	195	284	165	134	317	171	202	212	112	130	479	431	390	332	257	301	508	412	414	501	250	207	425	363	565	487	311	299	396	314	340	194	286	179	310	189	263	205
AT1G05990	Carubv10010897	CARHR005510	Thhalv10009546	3	4	8	2	13	5	4	1	6	1	4	0	7	1	15	5	16	0	0	0	1	0	0	0	1	0	0	0	0	1	0	0	0	0	0	0	7	28	11	8	17	2	6	12	6	11
AT1G06010	Carubv10010720	CARHR005530	Thhalv10009243	561	362	631	423	556	349	751	545	570	666	556	379	525	318	357	373	301	310	602	520	721	372	335	374	723	548	667	579	460	240	507	452	735	570	424	393	613	579	473	356	1039	703	511	327	418	521
AT1G06040	Carubv10010113	CARHR005560	Thhalv10008612	5960	5663	1651	897	11181	9768	5877	4723	1247	1056	6449	8524	7166	5179	1152	864	8154	6712	9209	7692	1593	444	12715	12987	7123	6361	901	675	8354	7861	7786	7281	888	643	11318	8676	4101	4164	1648	987	7759	9377	4399	1944	1138	881
AT1G06050	Carubv10009838	CARHR005570	Thhalv10008266	118	241	197	268	239	248	116	162	183	230	87	225	142	225	144	175	187	161	0	0	0	0	0	0	0	3	0	5	0	0	0	3	0	0	0	0	211	706	335	429	471	797	229	565	228	467
AT1G06060	Carubv10009937	CARHR005580	Thhalv10008762	793	703	638	580	550	665	659	700	635	668	345	674	709	675	591	571	642	475	797	828	629	307	571	707	707	666	581	492	576	459	828	814	710	518	630	679	444	478	528	414	527	574	431	306	368	456
AT1G06070	Carubv10008993	CARHR005590	Thhalv10007692	643	785	797	611	768	659	646	623	619	629	647	699	660	679	519	627	757	619	891	698	584	622	879	830	748	575	658	582	748	688	778	605	685	641	785	793	872	1169	718	693	1201	1367	673	749	597	611
AT1G06080	Carubv10012159	CARHR005600	Thhalv10008299	427	213	125	34	277	71	366	189	121	48	152	155	557	316	57	20	204	134	79	55	102	73	149	76	74	124	122	112	174	111	104	55	79	123	75	72	379	174	153	32	447	49	157	69	146	15
AT1G06090	Carubv10009877	CARHR005610	Thhalv10008185	70	85	129	12	139	44	172	137	154	120	124	106	108	109	75	29	138	72	9	9	146	24	65	10	46	17	41	14	20	11	25	12	20	14	46	7	7	53	51	14	24	6	22	28	9	8
AT1G06110	Carubv10012429	CARHR005620	Thhalv10007687	1131	777	1107	851	839	644	1027	767	1005	965	643	778	1061	747	1005	975	758	574	583	344	588	475	656	540	505	398	661	543	528	461	510	351	717	507	604	549	833	969	980	829	968	1166	905	490	696	776
AT1G06135	Carubv10010975	CARHR124970	Thhalv10017816	0	36	0	9	0	15	0	16	0	3	0	9	0	41	1	33	0	8	0	92	0	11	0	43	0	203	1	24	0	32	0	80	13	57	0	25	0	59	0	1	1	19	0	67	0	3
AT1G06137	Carubv10011363	CARHR005650	Thhalv10009900	0	10	0	10	0	11	0	9	0	0	0	13	0	8	0	14	0	10	0	57	0	9	1	30	0	89	9	16	0	13	0	46	0	17	0	6	0	26	0	3	2	14	0	37	0	9
AT1G06140	Carubv10011460	CARHR005670	Thhalv10018358	23	49	102	61	17	32	4	20	73	16	9	23	30	50	70	75	33	23	90	275	161	198	131	89	51	295	136	99	65	69	59	304	150	103	74	85	79	132	128	76	144	175	47	67	103	88
AT1G06150	Carubv10011638	CARHR005660	Thhalv10022616	99	108	159	89	120	125	82	80	136	66	66	106	132	125	129	134	97	85	1151	585	415	957	1612	1504	942	515	917	947	1177	1020	958	403	911	884	987	904	1123	947	1232	885	1800	1899	769	390	850	798
AT1G06160	Carubv10010105	CARHR005690	Thhalv10008518	581	1404	1100	1917	300	735	700	868	783	1181	211	620	433	609	488	921	200	454	155	353	139	209	147	272	149	319	47	145	180	116	179	239	90	144	140	265	179	388	125	210	178	163	163	219	71	165
AT1G06170	Carubv10009189	CARHR005700	Thhalv10009992	5	6	8	1	16	3	2	7	5	4	9	4	2	2	3	0	7	3	107	15	44	29	201	102	58	15	69	28	197	67	110	30	71	45	140	87	51	11	53	2	35	4	30	4	40	2
AT1G06190	Carubv10011218	CARHR005720	Thhalv10007829	2198	2035	4368	2038	3071	1987	1923	1798	3794	1944	1896	2451	2624	2156	3309	2652	3135	1870	1577	694	852	834	1397	816	1201	935	1229	780	1443	830	1328	880	1255	1055	1455	1114	1054	965	1320	471	814	531	785	626	1099	525
AT1G06200	Carubv10012464	CARHR005730	Thhalv10008791	1438	1489	1909	1492	1584	1646	1513	1522	1667	1919	1144	1648	1609	1293	1511	1484	1597	1489	912	625	1168	945	937	824	754	679	912	870	942	595	908	590	1115	1010	913	690	797	831	977	790	917	787	732	509	822	859
AT1G06210	Carubv10009444	CARHR005740	Thhalv10007923	632	1167	885	801	1078	1014	692	715	766	802	602	1069	678	939	665	858	1159	786	663	456	827	639	720	777	737	582	773	786	754	534	587	412	684	723	724	556	760	907	869	955	1256	1586	652	486	632	780
AT1G06220	Carubv10000141	CARHR005750	Thhalv10006688	1720	2003	3324	2091	2821	1946	1293	1012	2236	1470	1440	2075	1912	2109	2768	2711	3851	1632	2554	1465	1438	2291	4492	2355	1985	1736	2198	1829	2660	1925	2053	1585	2215	1743	2957	2163	2991	2926	4133	2821	4353	4322	1974	1709	2602	2052
AT1G06230	Carubv10008353	CARHR005770	Thhalv10006830	2138	2642	3154	2751	2950	2403	1990	1675	2355	2285	1916	2261	2128	2485	2517	2735	2410	1653	1940	1408	932	2078	2685	1707	1406	1550	1563	1527	1323	1183	1412	1517	1894	1545	1806	1403	1424	1776	2096	1709	2200	2579	1170	1000	1374	1239
AT1G06240	Carubv10011561	CARHR005780	Thhalv10007851	306	201	487	242	364	211	245	170	386	269	189	342	383	244	414	420	397	309	899	442	379	614	763	528	421	412	733	535	602	444	616	406	790	583	730	586	320	252	294	261	329	299	243	123	258	188
AT1G06260	Carubv10011832	CARHR005820	Thhalv10008102	0	0	0	3	3	2	0	0	1	0	0	0	2	1	3	0	1	1	0	0	0	0	0	3	1	0	1	0	1	2	0	0	1	0	1	1	0	0	2	1	1	3	1	0	0	0
AT1G06270	Carubv10009635	CARHR005830	Thhalv10008110	107	86	192	79	191	106	96	44	163	77	105	140	118	69	145	101	178	109	119	111	110	97	222	162	133	143	154	119	178	143	155	144	148	116	151	149	446	359	455	381	415	363	255	208	366	303
AT1G06280	Carubv10011711	CARHR005860	Thhalv10008796	0	0	0	0	0	0	0	0	0	0	0	0	0	0	0	0	0	0	0	0	0	0	0	0	0	0	0	0	0	0	0	0	0	0	0	0	0	0	0	0	0	0	0	0	0	0
AT1G06290	Carubv10012245	CARHR005870	Thhalv10006988	1088	2746	1912	2068	1033	1289	966	1029	1373	1293	454	1315	1146	2381	1877	3346	1626	1035	2206	1722	1903	3596	1474	1575	1528	1747	1810	2819	993	1520	1588	1634	2006	2139	1682	1617	1653	2946	2754	3039	2013	3258	1549	1720	2110	2342
AT1G06320	Carubv10011022	CARHR005880	Thhalv10009758	8	0	19	1	37	1	13	3	8	0	27	7	14	2	5	0	15	4	17	8	10	3	4	15	24	11	9	8	17	4	15	9	12	22	21	17	18	40	21	6	31	17	25	23	29	20
AT1G06330	Carubv10012029	CARHR005890	Thhalv10009000	5	3	8	1	15	0	2	4	5	0	1	3	10	3	1	4	10	3	10	22	47	22	37	10	22	23	16	8	20	8	18	25	19	37	35	13	3	17	4	2	6	7	1	4	1	0
AT1G06340	Carubv10011095	CARHR005900	Thhalv10009453	0	0	0	0	1	0	0	0	2	2	0	0	0	3	2	1	1	2	0	1	5	1	0	0	0	0	2	0	0	0	0	0	0	1	2	0	2	1	0	1	2	0	0	3	0	0
AT1G06360	Carubv10011896	CARHR005980	Thhalv10008191	838	443	982	253	853	270	615	354	883	309	469	425	808	543	567	154	490	294	282	153	155	93	150	150	116	153	95	70	105	59	137	127	208	141	130	130	308	210	220	121	255	67	188	139	208	74
AT1G06380	Carubv10011944	CARHR005990	Thhalv10008540	375	381	715	393	839	563	348	282	533	392	481	516	499	330	423	349	694	453	408	257	623	393	677	413	580	325	486	414	563	347	454	312	510	520	394	432	406	372	424	234	458	387	320	250	291	245
AT1G06400	Carubv10010250	CARHR006010	Thhalv10008720	1492	1431	1774	1680	1860	1650	1715	1470	1512	2259	1086	1484	1497	1290	1549	1869	1517	1295	1141	743	1967	1523	698	868	1196	758	1497	1780	767	716	1074	800	1731	1585	789	1058	946	1268	1062	1386	1156	1396	986	776	993	1528
AT1G06410	Carubv10008292	CARHR006020	Thhalv10006783	3736	6096	5404	5063	4468	4891	4266	3239	3727	4437	3823	4204	4167	6001	5843	6189	5719	2823	6084	6170	4122	5899	6673	5363	4363	5422	4525	5000	4014	4327	5109	6238	4882	4157	5050	5045	5425	8768	6929	6003	6084	6215	4879	5428	5432	4238
AT1G06420	Carubv10010258	CARHR006030	Thhalv10008812	144	39	125	27	84	39	119	91	133	102	136	78	96	71	41	20	27	31	46	37	27	24	28	36	39	33	51	24	21	12	36	30	29	35	11	21	124	153	64	54	131	128	114	109	69	76
AT1G06430	Carubv10011447	CARHR006040	Thhalv10006971	2362	3996	2188	2382	9138	7085	2953	2549	1719	1972	3347	5141	3402	3480	3187	4236	8012	4604	3869	1807	2118	3216	7867	6360	2870	1759	2907	2601	4519	3920	3601	2150	3082	2413	5576	4750	2684	2823	5822	3027	4931	4478	3083	1772	4262	2976
AT1G06440	Carubv10012333	CARHR006050	Thhalv10007863	39	47	226	90	73	41	27	26	180	71	42	56	91	62	138	123	83	36	94	78	155	95	120	54	89	57	72	68	62	38	76	58	126	90	85	67	133	193	208	107	182	126	93	123	196	94
AT1G06450	Carubv10011336	CARHR006060	Thhalv10008017	108	135	192	133	234	127	63	51	111	78	90	137	191	126	111	116	217	145	255	128	111	205	491	292	211	87	135	166	346	261	266	180	165	158	317	291	17	15	11	15	33	38	6	4	13	20
AT1G06460	Carubv10012533	CARHR006070	Thhalv10008353	668	585	6278	3663	714	634	843	664	5296	3437	639	733	799	715	5777	4564	762	635	3878	2338	7985	10114	3148	2811	1729	1546	13703	10071	3051	2396	3432	2032	14616	9408	4052	3508	1572	1811	9203	4983	1572	1247	2224	1220	7619	4374
AT1G06470	Carubv10009289	CARHR006080	Thhalv10007752	626	726	1117	834	923	792	625	517	884	741	470	741	704	608	907	831	821	534	745	560	1296	865	665	608	742	602	1168	989	609	483	755	451	1217	833	646	604	1286	1783	1584	1404	1316	1892	1122	1176	1362	1163
AT1G06475	Carubv10010766	CARHR006090	Thhalv10009210	61	19	321	53	235	76	86	37	145	61	73	66	74	36	88	38	139	120	81	80	149	106	512	277	229	103	325	171	732	152	168	36	262	194	185	171	168	205	159	81	399	168	124	118	118	75
AT1G06500	Carubv10010938	CARHR006110	Thhalv10009066	455	198	450	274	385	216	493	305	408	516	208	310	438	235	242	257	251	205	214	195	339	170	179	176	275	215	235	229	188	89	226	234	270	215	203	176	340	295	272	255	239	171	312	169	211	244
AT1G06510	Carubv10011989	CARHR006130	Thhalv10009532	498	617	778	501	448	451	403	410	604	357	272	420	445	638	617	672	382	342	391	256	309	284	317	224	270	239	343	280	225	185	346	258	408	318	348	194	877	1180	865	818	723	732	838	604	826	756
AT1G06520	Carubv10012249	CARHR006140	Thhalv10007168	38	144	84	35	82	80	46	63	60	35	15	37	103	134	56	71	74	31	15	12	20	23	61	43	12	15	31	12	34	30	19	9	20	22	44	19	22	38	37	27	34	31	19	11	25	24
AT1G06530	Carubv10009757	CARHR006150	Thhalv10009835	1573	1952	3520	2505	2753	1933	1283	1354	2566	2083	1132	2315	1939	1853	2311	2302	2780	1848	1366	976	1522	1908	2149	1726	1931	1164	2417	2146	2112	1050	1540	1020	2288	2186	1737	1600	1754	2251	2118	1421	3091	2883	1865	1403	1824	1483
AT1G06550	Carubv10009384	CARHR006160	Thhalv10007893	1974	2255	3004	1841	5608	5054	1862	1871	2460	2196	3735	4150	1852	1750	1582	1620	4016	2814	1216	837	910	1169	1363	1558	1022	1100	1180	1463	1303	1300	1046	778	1011	1240	1212	1057	719	992	1035	800	1163	1442	738	610	728	826
AT1G06560	Carubv10011768	CARHR006170	Thhalv10007146	585	503	1035	486	583	345	497	399	826	317	294	437	723	580	880	631	704	395	529	226	332	389	671	400	385	335	437	363	467	304	476	315	515	459	503	382	505	507	584	392	401	443	443	306	472	393
AT1G06570	Carubv10009131	CARHR006180	Thhalv10007634	1535	3395	1490	3222	3175	2930	1379	2211	1255	2767	1171	2608	1892	2613	2160	4277	2884	2141	1529	1329	1650	2134	2069	1818	1002	934	1851	2028	1641	1386	1563	1273	2283	1898	2198	1878	0	0	0	0	0	0	0	0	0	0
AT1G06590	Carubv10008254	CARHR006200	Thhalv10006743	442	527	665	485	469	324	423	342	444	425	373	412	451	534	448	430	364	266	289	218	176	321	354	251	226	245	266	230	263	224	242	159	284	247	274	228	326	353	385	268	237	228	249	180	247	249
AT1G06620	Carubv10011473	CARHR006210	Thhalv10009355	404	843	618	1090	537	809	333	436	557	654	472	589	273	464	360	635	542	325	330	650	515	502	395	509	330	548	627	566	389	365	493	390	580	523	502	512	185	428	183	152	478	432	193	261	137	120
AT1G06650	Carubv10009503	CARHR006340	Thhalv10009596	910	1427	1573	1827	1084	1745	1059	1014	1559	1651	868	1795	1140	1216	1721	2346	1373	1443	625	360	432	441	376	221	406	295	518	430	419	216	517	259	539	277	530	288	816	726	1273	1620	952	1159	896	477	1253	1707
AT1G06660	Carubv10012445	CARHR006330	Thhalv10007468	121	92	154	44	75	31	67	110	133	55	66	63	120	123	59	54	53	53	81	55	70	29	71	29	57	60	85	35	65	47	57	46	37	44	58	38	93	52	68	54	38	37	86	30	65	63
AT1G06670	Carubv10011734	CARHR006350	Thhalv10006566	1855	1733	3317	2062	3686	2612	1372	950	2112	1319	1695	2470	2088	1983	2611	2353	4487	1864	1122	418	318	1112	1706	756	771	435	689	615	1005	605	856	499	928	737	1017	754	1706	1169	1738	1092	2279	1866	1003	636	1239	782
AT1G06680	Carubv10011102	CARHR006360	Thhalv10008504	59712	53539	32384	15394	33809	28289	61637	44540	30807	16196	28042	34590	62640	53047	28411	23242	29054	29635	104782	62682	30008	27162	49390	31602	47253	40650	50142	28586	36446	25107	69217	48597	54338	31636	70543	36700	40944	45608	34098	13006	22347	11580	49119	24657	23713	11222
AT1G06690	Carubv10011808	CARHR006370	Thhalv10007941	1289	1733	1638	1021	1938	1393	1442	1136	1414	1033	1051	1344	1190	1166	1306	1163	1184	795	1756	1335	904	1371	1559	965	1171	1411	2159	1334	1022	552	1138	1147	1797	1089	1088	637	1058	1604	1545	496	1041	758	1419	1106	974	625
AT1G06700	Carubv10009518	CARHR006380	Thhalv10007987	2218	2453	2690	2294	2181	1576	2181	2328	2405	2410	1661	1766	2210	2320	2238	2539	1941	1440	1696	1593	2274	2277	833	851	1376	1753	2196	2250	809	653	1377	1689	2819	2268	981	815	1587	3540	1819	1673	3034	5098	1374	1965	1029	1596
AT1G06710	Carubv10008194	CARHR006390	Thhalv10006683	112	261	428	238	223	182	32	69	302	111	69	220	187	245	446	338	353	123	226	136	138	269	437	236	287	189	265	250	275	152	219	175	302	260	267	206	237	188	219	176	312	258	184	117	196	136
AT1G06720	Carubv10012207	CARHR006400	Thhalv10006612	1245	1412	3703	1691	3040	1693	935	727	2353	1246	1451	1894	1482	1557	2899	2124	3643	1200	1474	656	1013	1926	4113	2162	1945	1245	1716	1547	2120	1186	1713	871	1886	1688	2020	1503	2911	2623	4074	2131	4608	6030	1879	1741	2953	1575
AT1G06730	Carubv10008753	CARHR006420	Thhalv10007491	394	382	621	522	546	400	335	301	536	349	347	459	439	413	503	507	581	357	300	146	172	358	494	302	332	203	348	329	431	253	297	186	380	266	426	361	549	610	702	465	650	613	453	281	572	404
AT1G06750	Carubv10011536	CARHR006430	Thhalv10009309	81	46	63	35	157	33	85	44	89	59	76	73	62	57	49	40	66	68	146	118	15	76	123	139	165	123	86	86	124	71	141	111	100	132	136	109	416	433	370	318	394	429	249	202	288	309
AT1G06770	Carubv10009276	CARHR006460	Thhalv10007754	332	552	473	406	415	357	295	365	387	405	290	403	354	465	442	447	346	263	777	695	612	708	1046	1017	798	560	768	726	879	773	795	636	826	782	801	785	69	98	153	104	189	207	80	74	91	127
AT1G06780	Carubv10008650	CARHR006470	Thhalv10007109	435	780	723	665	754	664	482	502	410	479	423	627	496	636	549	581	704	507	332	377	170	412	445	447	403	452	371	408	332	286	406	402	448	466	389	439	513	837	590	692	851	1096	411	512	522	529
AT1G06790	Carubv10011131	CARHR006490	Thhalv10028967	456	193	500	224	617	357	450	288	391	308	459	383	489	203	338	216	546	358	259	160	294	248	383	305	265	179	353	238	314	197	259	175	296	268	275	281	794	941	602	449	937	802	720	448	496	486
AT1G06800	Carubv10008898	CARHR006500	Thhalv10007393	243	987	459	711	329	524	238	578	388	512	204	440	258	697	325	602	269	418	1189	1438	1034	1874	865	1311	1053	1106	1686	2127	707	1180	1047	1083	1995	1756	1044	1463	97	142	142	73	172	155	132	59	103	54
AT1G06820	Carubv10008639	CARHR006510	Thhalv10007141	1338	1331	1773	1096	1476	1076	1110	1007	1469	933	957	1082	1203	1323	1646	1417	1238	740	2546	1318	645	1465	1719	1538	1829	1099	1647	1813	1211	921	1953	1165	1917	1626	2114	1483	2415	2453	4192	2056	1394	1003	2664	1463	2918	1961
AT1G06830	Carubv10011626	CARHR006520	Thhalv10009180	371	509	529	179	327	268	196	351	416	149	191	264	352	476	262	124	279	282	236	1019	406	254	519	563	310	713	262	267	595	420	550	503	197	218	724	522	165	375	242	90	134	107	215	171	94	84
AT1G06840	Carubv10008222	CARHR006530	Thhalv10006712	828	3021	1652	1939	865	1515	549	1085	1144	1112	514	1136	838	2232	1444	1921	1053	811	778	1128	643	1109	1027	1226	808	1211	791	972	595	783	729	1200	917	942	755	810	983	3996	1442	1383	2770	6628	774	2977	1174	1241
AT1G06850	Carubv10009673	CARHR006540	Thhalv10008146	306	287	381	214	379	226	267	221	350	241	332	283	336	283	257	196	287	255	311	407	197	188	298	294	331	471	265	212	263	219	292	390	257	218	392	237	354	619	332	188	356	401	335	380	245	208
AT1G06870	Carubv10009515	CARHR006550	Thhalv10008025	578	839	886	808	853	749	507	490	708	566	482	698	551	616	759	605	865	604	1188	1434	864	1020	1085	1199	1313	1556	1190	1097	1238	1046	1227	1386	1108	980	1254	1267	2178	3625	1993	1749	4131	6999	1746	2375	1688	1478
AT1G06890	Carubv10009574	CARHR006560	Thhalv10008030	1024	1404	2791	2708	1730	1653	1162	884	2184	2159	888	1526	1292	1442	2151	2636	1808	1336	2657	2156	2920	2535	3205	2718	3293	2379	2854	2991	3733	2459	2835	1817	2686	2383	3025	2487	2405	2786	3554	4048	4008	4405	2099	1752	3109	3805
AT1G06900	Carubv10012025	CARHR006570	Thhalv10006660	1465	1540	2645	1765	2130	1260	1248	1023	1903	1396	1404	1524	1734	1756	2469	2045	2303	1068	1313	526	557	955	1946	757	1157	816	962	742	1345	628	998	654	867	710	1304	728	2060	1759	2186	1558	1760	1105	1395	1041	1649	1147
AT1G06910	Carubv10011115	CARHR006580	Thhalv10007960	233	138	204	127	242	244	178	123	239	240	223	217	198	122	171	163	249	125	206	72	125	77	156	97	113	93	144	103	129	63	112	72	167	126	129	99	85	45	117	69	92	68	78	39	73	87
AT1G06920	Carubv10011767	CARHR006590	Thhalv10009577	0	0	0	0	2	0	0	0	0	0	0	0	0	0	0	0	0	0	1	0	7	3	0	0	0	0	1	0	0	0	0	1	7	1	0	0	0	0	0	0	0	0	0	0	0	0
AT1G06923	Carubv10011424	CARHR006600	Thhalv10009633	3	40	28	2	23	2	0	10	11	0	26	1	17	8	17	6	20	1	0	2	23	1	3	4	6	3	6	1	2	1	5	0	6	0	3	2	1	0	2	0	1	0	1	1	1	0
AT1G06930	Carubv10011615	CARHR006610	Thhalv10008904	36	24	42	2	24	12	19	32	27	12	12	20	30	15	11	8	24	20	0	0	1	5	8	3	10	4	2	3	4	6	6	2	3	8	11	2	13	9	6	2	8	4	4	5	5	3
AT1G06950	Carubv10008186	CARHR006620	Thhalv10006671	3827	5487	9479	4550	5316	3583	3644	3099	6774	3982	2729	3847	4817	5415	8172	7871	6290	2573	7279	3106	2577	4863	7552	2842	4610	3990	4624	3437	4378	2418	4411	3707	4807	3677	5411	2935	6756	5569	9196	4258	5917	4049	4951	3609	5677	3221
AT1G06970	Carubv10011344	CARHR006640	Thhalv10010023	6	2	0	2	17	2	1	6	1	0	0	2	3	2	3	2	7	2	0	0	0	0	0	0	0	1	0	0	0	0	0	0	0	0	0	0	4	21	9	7	15	4	12	9	5	3
AT1G06980	Carubv10012328	CARHR006650	Thhalv10009700	17	3	22	7	74	74	8	15	17	5	125	23	14	15	13	11	54	26	41	17	57	22	53	33	23	13	44	22	36	27	38	9	30	20	61	45	5	9	8	1	15	12	5	17	10	14
AT1G06990	Carubv10012021	CARHR006660	Thhalv10008013	3	0	0	0	0	0	0	2	0	0	0	5	3	0	0	0	0	0	0	0	0	0	0	0	0	1	0	0	0	0	0	0	0	0	0	0	0	0	2	0	0	0	0	0	0	0
AT1G07000	Carubv10011870	CARHR006680	Thhalv10007127	223	4297	669	1626	367	1053	193	1897	496	705	215	867	279	4780	508	1426	403	795	584	6032	1311	980	591	1390	540	4928	843	713	380	1001	403	5646	746	782	360	1021	559	4153	683	1629	1478	4205	470	3196	783	1285
AT1G07010	Carubv10012402	CARHR006700	Thhalv10009773	1357	1171	546	424	3234	3313	1424	1000	473	431	2245	2684	1464	1175	530	588	2784	1910	2103	1057	288	450	3311	2361	1271	897	570	514	2175	1322	1582	1060	712	466	3485	2100	549	576	196	115	1338	1261	617	323	154	135
AT1G07020	Carubv10012654	CARHR006710	Thhalv10008798	402	667	559	422	301	292	414	538	502	622	207	337	372	616	378	416	265	324	300	324	541	260	123	236	343	276	386	355	171	179	279	245	414	296	155	247	313	509	286	349	350	353	339	270	288	251
AT1G07030	Carubv10011609	CARHR006720	Thhalv10008381	820	1256	1415	1348	1371	1034	683	1058	992	1161	935	1113	802	1059	835	979	1035	986	297	268	170	213	216	152	298	229	341	273	286	199	284	296	265	215	283	255	696	2215	778	1012	984	1967	696	1494	616	1237
AT1G07040	Carubv10012278	CARHR006730	Thhalv10007958	402	686	1013	1962	469	576	396	399	842	1447	216	570	451	580	1404	2668	522	408	2191	4125	4359	8245	1115	2446	1609	2453	5039	5704	743	1954	2697	3608	6771	5308	1382	2373	399	974	1905	2428	1265	2474	436	712	1194	2373
AT1G07050	Carubv10011200	CARHR006740	Thhalv10008808	8	1	1411	614	48	35	32	8	1493	1062	55	55	8	10	1240	676	58	44	4	8	2639	1166	9	34	8	22	2976	1555	55	43	36	15	2048	1164	47	186	20	10	732	225	17	9	8	8	509	315
AT1G07060	Carubv10010114	CARHR006750	Thhalv10009490	2	4	6	0	4	0	0	0	3	0	0	2	0	0	1	3	2	0	3	29	2	1	3	0	6	11	3	4	3	2	0	12	0	9	0	3	7	20	12	13	4	5	3	5	10	22
AT1G07080	Carubv10010028	CARHR006780	Thhalv10008497	1864	1693	2377	1991	2642	2344	2462	1802	2091	2312	2090	1968	1749	1500	1655	2062	1883	1907	601	431	1797	1906	1041	1044	617	449	1595	1680	968	1028	740	386	1588	1460	1029	923	869	1145	1325	1093	1361	1090	974	511	1051	1259
AT1G07090	Carubv10010340	CARHR006790	Thhalv10009726	212	331	394	280	346	344	256	229	400	297	193	328	196	257	226	287	301	334	125	71	69	129	135	136	62	65	87	74	105	107	99	37	117	113	171	142	134	135	101	81	376	284	87	58	54	55
AT1G07110	Carubv10012057	CARHR006800	Thhalv10006901	3280	3448	6068	4693	3637	3089	3650	2845	5143	4737	3011	3263	3461	3442	6238	6289	3381	2075	8998	5054	5403	11303	5854	4051	4529	4008	9707	9499	3975	3011	6810	5418	10382	7266	6749	4412	5454	7279	9351	5227	3270	2760	5293	4060	5938	5581
AT1G07120	Carubv10012267	CARHR006810	Thhalv10007909	14	13	7	5	4	4	7	10	7	4	6	9	10	6	6	7	11	2	1	0	0	3	0	1	5	2	1	1	0	1	4	1	2	0	1	0	3	11	7	1	5	0	1	3	6	1
AT1G07130	Carubv10010524	CARHR006820	Thhalv10008979	151	245	188	211	198	205	108	207	193	196	146	148	137	219	143	176	117	137	172	92	67	90	147	161	184	84	112	171	208	102	183	102	168	153	178	158	167	386	192	235	102	150	159	165	138	271
AT1G07135	Carubv10011181	CARHR006840	Thhalv10009119	233	4160	1654	2795	419	2169	133	2901	883	1199	235	2003	112	7181	1056	2213	298	1138	5	676	21	31	40	183	17	1073	12	84	32	56	9	983	60	104	19	111	97	1123	130	141	250	950	98	1072	100	212
AT1G07140	Carubv10010221	CARHR006850	Thhalv10008685	4332	6796	8214	7319	6999	6004	4306	5218	6431	6697	4478	5572	5520	6885	6195	6296	7627	5299	2925	3877	3993	2753	3516	3135	4123	4559	3480	3604	4270	2247	3430	4173	3101	3288	3186	3507	8148	9270	7538	6599	8668	8076	6652	5738	6906	5890
AT1G07150	Carubv10008850	CARHR006860	Thhalv10007482	62	145	222	244	214	266	41	62	147	141	76	191	93	101	220	191	92	107	19	42	66	49	39	54	15	21	98	58	17	31	22	31	47	70	31	32	145	123	116	80	194	198	85	53	95	117
AT1G07160	Carubv10009317	CARHR006870	Thhalv10008595	16	1026	37	497	91	531	9	596	20	156	68	408	24	1608	33	494	25	427	8	7824	438	2187	80	538	35	6542	788	2461	23	647	26	9371	686	2268	25	541	138	2045	127	242	163	969	50	1847	105	307
AT1G07175	Carubv10012404	CARHR006890	Thhalv10009263	1	11	14	23	10	2	16	10	7	22	11	10	4	10	7	11	8	3	20	19	130	59	58	31	91	42	118	49	57	16	40	32	34	59	25	24	0	4	4	2	0	2	2	3	0	4
AT1G07180	Carubv10008908	CARHR006910	Thhalv10007398	2837	3143	445	259	5705	3701	2704	2463	196	314	3239	3751	3443	3164	317	317	5504	2972	3254	2103	268	94	6312	3868	2755	2229	189	192	3783	2388	2990	2322	84	90	5185	2771	1761	2090	757	251	1774	810	1827	1294	527	183
AT1G07200	Carubv10008201	CARHR006920	Thhalv10006689	761	916	1110	1133	847	1025	439	415	851	720	427	850	760	839	1141	1373	1095	646	611	374	337	646	795	650	379	322	588	625	552	566	578	337	606	550	561	603	607	699	749	782	927	1266	429	365	475	674
AT1G07210	Carubv10009750	CARHR006930	Thhalv10008508	1174	1244	2010	1137	1696	1260	1334	1171	1656	1139	979	1330	1656	1295	1342	1149	1676	1047	793	598	1340	780	1044	814	890	862	900	800	1074	681	881	703	881	863	942	856	1627	1669	1522	1166	1674	1523	1419	998	1329	987
AT1G07220	Carubv10008891	CARHR006940	Thhalv10007804	327	674	641	432	568	589	205	536	472	328	287	515	321	801	489	509	504	389	340	357	294	456	482	400	430	396	522	524	525	294	390	342	575	432	404	402	193	226	291	245	242	322	153	135	240	254
AT1G07230	Carubv10008826	CARHR006950	Thhalv10007332	698	1234	854	1051	624	807	609	687	687	844	454	708	777	1089	781	1109	653	597	979	1199	829	1356	963	1153	755	1129	943	1095	674	991	1031	1128	1136	1030	880	1075	249	621	606	683	562	1263	361	492	425	394
AT1G07240	Carubv10009037	CARHR006960	Thhalv10007519	506	2188	1126	1409	600	855	429	1333	892	1162	271	748	445	1591	978	1367	534	633	0	21	3	0	4	2	3	14	0	5	1	5	3	18	1	0	3	1	742	2850	1213	1697	1304	2820	832	1927	1075	1383
AT1G07250	Carubv10009025	CARHR006970	Thhalv10007440	587	726	821	805	1098	743	345	392	667	529	508	782	525	666	720	918	799	620	225	276	121	217	788	646	107	197	200	178	496	457	199	215	209	173	524	488	417	766	522	685	1152	1570	371	437	389	541
AT1G07260	Carubv10009021	CARHR006980	Thhalv10009289	260	325	527	832	361	348	219	201	354	482	130	335	198	207	284	489	242	315	4	8	3	4	7	3	12	7	3	4	2	3	5	10	7	5	10	8	188	2240	524	868	1092	1905	182	1480	310	391
AT1G07280	Carubv10008793	CARHR007000	Thhalv10007265	802	533	2722	1937	522	585	829	329	2401	1625	461	780	1031	565	3361	2968	688	496	683	249	2040	2851	629	493	225	174	2860	1862	382	485	618	209	3801	1722	670	574	228	191	2773	1388	392	442	381	106	2017	1293
AT1G07290	Carubv10009481	CARHR007010	Thhalv10007927	73	55	91	53	112	59	37	26	94	36	72	58	75	54	71	46	104	50	37	25	32	53	81	50	44	26	38	39	53	49	28	19	32	31	55	36	28	32	9	5	32	16	9	6	12	7
AT1G07300	Carubv10011953	CARHR007020	Thhalv10009101	203	205	277	193	206	208	176	291	184	269	134	149	247	211	102	134	211	152	182	156	122	80	355	267	249	184	147	122	387	167	185	122	131	134	373	226	136	240	106	211	223	224	98	110	147	203
AT1G07310	Carubv10009572	CARHR007040	Thhalv10008043	766	1325	1108	1325	665	899	794	795	915	1055	419	823	727	1138	932	1306	642	776	1222	1135	946	854	884	1006	894	859	1303	934	805	913	958	1016	1230	1099	950	1094	547	906	1410	1377	1079	1383	584	383	1123	1151
AT1G07320	Carubv10009944	CARHR007030	Thhalv10008395	11955	9253	14552	6466	10289	6109	10793	9404	14135	7639	6183	7352	13230	9715	10863	7841	7797	5880	16220	8722	5910	5916	8462	4319	9963	8770	11764	6783	7857	3333	10108	9049	11339	7731	9287	5014	11259	11968	14323	5278	6515	3334	12585	6703	9654	5711
AT1G07340	Carubv10008940	CARHR007050	Thhalv10007449	0	0	0	2	0	0	0	0	2	0	0	0	0	0	0	1	0	0	0	0	5	1	0	0	0	0	0	0	0	0	0	0	1	0	0	0	0	0	0	0	0	0	0	0	0	0
AT1G07350	Carubv10009665	CARHR007060	Thhalv10008061	3634	4308	1802	1252	4471	2608	3036	2320	1249	894	1712	2054	2949	2188	1267	795	4114	2881	11154	10130	557	356	3351	4057	6547	7447	411	492	4005	3720	6252	6791	442	397	6384	6620	3799	4466	792	633	3547	3612	2514	1718	670	624
AT1G07380	Carubv10008356	CARHR007090	Thhalv10006859	238	275	365	291	231	291	169	129	241	180	100	255	269	259	360	417	385	189	404	924	204	500	333	482	330	567	384	458	225	328	345	547	559	476	327	375	360	383	486	729	435	783	303	238	421	554
AT1G07410	Carubv10010276	CARHR007150	Thhalv10008748	33	47	66	36	219	45	24	34	45	17	26	45	58	57	43	31	147	35	494	854	349	383	342	439	658	802	510	481	557	479	564	647	404	440	538	623	325	454	223	211	370	444	312	257	174	157
AT1G07420	Carubv10009860	CARHR007160	Thhalv10008485	476	350	1830	1402	1565	1059	575	522	1574	1552	862	872	764	392	1339	1253	862	624	591	311	647	768	714	752	656	506	1095	1017	890	835	662	375	928	872	761	736	604	723	2863	1860	918	800	613	431	2329	1797
AT1G07430	Carubv10009150	CARHR007170	Thhalv10007705	5	13	11	22	19	16	7	0	8	14	19	22	4	10	4	11	9	15	4	8	2	2	15	25	5	5	2	6	19	5	7	8	10	1	8	12	12	32	16	9	48	74	6	11	6	10
AT1G07440	Carubv10010021	CARHR007180	Thhalv10008362	648	439	1585	755	674	556	578	441	1504	794	588	552	590	456	1845	1224	698	570	1238	718	2042	1713	1101	1050	1486	539	1875	2220	1312	718	1548	711	2200	2213	1257	1280	1736	1499	4488	2450	1326	862	2083	835	3508	2322
AT1G07460	Carubv10010864	CARHR007200	Thhalv10009305	0	1	0	2	1	0	0	0	3	4	0	0	3	0	2	0	0	0	0	0	0	0	2	0	1	0	1	0	0	2	1	0	1	0	0	0	1	6	0	1	0	0	0	0	0	2
AT1G07473	Carubv10012574	CARHR007230	Thhalv10009441	0	0	0	5	0	5	11	0	0	3	0	1	0	2	2	2	2	0	0	0	0	0	2	2	0	0	0	0	6	0	0	0	0	0	0	1	19	13	11	2	15	8	6	6	7	10
AT1G07510	Carubv10008328	CARHR007280	Thhalv10006814	1042	1383	1338	1162	1841	1495	853	811	939	999	883	1214	982	1407	1019	1330	1742	1329	447	494	300	618	759	829	473	735	437	786	458	640	471	498	441	517	539	735	866	1494	1070	973	2058	2916	606	910	819	707
AT1G07520	Carubv10010943	CARHR007290	Thhalv10006948	260	644	503	427	357	515	157	312	349	311	140	461	322	824	481	499	357	336	45	111	61	45	49	66	58	119	24	33	46	62	51	96	21	55	61	75	239	931	561	665	327	688	256	766	488	566
AT1G07530	Carubv10008391	CARHR007300	Thhalv10006868	1049	1406	1641	1717	1326	1613	752	1022	1342	1523	674	1384	1209	1261	1405	1812	1430	1094	1330	1290	894	1423	1417	1240	1068	1140	1266	1199	969	1074	1093	1306	1452	1173	1303	1290	1455	2290	1952	1611	2380	3687	1302	1480	1428	1860
AT1G07540	Carubv10011259	CARHR007310	Thhalv10007062	0	0	0	0	0	0	0	0	0	0	0	0	0	0	0	0	0	0	0	0	0	3	0	0	0	4	0	0	1	0	0	0	1	0	0	1	0	1	1	0	2	0	0	2	0	0
AT1G07560	Carubv10011533	CARHR007350	Thhalv10006786	65	205	158	103	110	150	49	74	98	55	96	95	106	117	251	132	147	30	31	83	157	105	112	90	146	159	81	79	94	63	86	130	100	81	127	70	349	567	296	613	409	523	131	375	582	397
AT1G07570	Carubv10009302	CARHR007360	Thhalv10007756	1006	1419	608	558	1653	1704	778	1151	431	629	675	1352	980	1257	395	648	1276	1243	640	557	544	764	1234	903	480	561	893	769	841	764	622	568	834	747	898	841	966	1611	1541	1351	1916	2077	832	778	1168	1519
AT1G07590	Carubv10008810	CARHR007380	Thhalv10007326	16366	16477	18585	17323	31111	26755	18186	14540	13885	19040	18250	18713	19032	11352	12867	13481	23948	17694	138	77	112	128	182	93	96	111	182	120	110	102	114	92	211	171	145	105	28513	37304	20790	33341	50816	46089	19557	19817	23837	44945
AT1G07615	Carubv10008970	CARHR007400	Thhalv10007444	351	305	583	279	443	243	340	278	446	342	242	306	390	378	474	322	410	282	598	417	327	561	551	410	616	476	578	520	423	337	527	395	727	610	509	407	712	766	737	473	761	588	598	434	624	397
AT1G07620	Carubv10008702	CARHR007410	Thhalv10007259	54	713	140	636	284	1130	47	275	116	273	159	584	71	422	116	436	272	412	103	1397	105	372	712	1564	324	1509	99	400	486	1149	202	1531	158	378	413	918	144	1422	136	290	876	1970	109	1242	103	274
AT1G07640	Carubv10011378	CARHR007430	Thhalv10008140	530	783	1309	1367	1024	1204	457	354	777	538	356	961	528	789	931	1068	986	865	212	325	108	351	307	391	116	256	213	252	195	195	205	224	337	289	244	293	478	850	776	604	846	947	383	365	376	468
AT1G07645	Carubv10012292	CARHR007450	Thhalv10009069	1	0	0	0	0	0	4	0	0	0	0	1	0	0	0	0	0	0	4	5	4	1	2	5	8	8	3	2	5	0	10	2	0	4	3	0	10	18	38	4	26	2	15	13	3	9
AT1G07650	Carubv10008366	CARHR007440	Thhalv10006761	1184	4159	1827	1585	1327	2131	976	2156	1357	1141	726	1918	1128	3914	1637	1835	1351	1265	1845	8308	1000	2521	2839	4481	1665	7555	2228	2571	1725	2622	1777	7674	2449	2513	1981	2763	1953	4922	2248	2700	3308	5069	1643	3071	2025	2250
AT1G07670	Carubv10008142	CARHR007620	Thhalv10006641	1143	2452	1816	1830	1610	1732	859	828	1191	1033	723	1681	1170	2109	1426	2141	2533	1549	2742	4940	1263	2595	2758	2410	2916	3970	1622	1850	1801	2370	1926	2377	1564	1701	2340	2777	3862	7726	4232	5160	3608	5761	2854	5001	2996	3173
AT1G07700	Carubv10010324	CARHR007470	Thhalv10026224	1463	1512	979	865	1937	2038	1420	1403	821	781	1326	1998	1680	1433	775	848	1886	1483	1038	1207	998	592	1183	1261	1095	1217	772	789	1199	1028	1041	1353	691	668	1656	1294	1118	1157	1021	787	1779	1392	1146	685	857	791
AT1G07705	Carubv10008611	CARHR007480	Thhalv10007092	617	687	1134	756	802	595	700	505	903	669	626	774	726	703	839	1021	799	510	844	475	470	818	968	728	813	571	892	957	804	520	779	416	892	833	889	618	612	676	684	760	524	680	489	445	573	588
AT1G07710	Carubv10012363	CARHR007490	Thhalv10009425	5	12	32	13	38	14	6	14	21	0	8	20	11	9	21	7	29	12	43	13	19	17	205	67	6	9	31	21	58	26	37	11	38	27	137	54	18	18	25	17	17	9	7	7	24	12
AT1G07720	Carubv10011152	CARHR007510	Thhalv10009782	685	620	1109	463	1313	834	664	329	939	332	508	668	889	671	732	381	1214	503	764	1006	1139	1284	2444	1095	763	706	1344	1920	1421	780	1227	1025	1229	1471	1378	937	149	198	120	85	551	221	165	137	86	99
AT1G07725	Carubv10011844	CARHR007520	Thhalv10007118	4	6	8	9	9	8	3	4	2	8	0	4	2	4	3	4	4	2	0	0	1	1	1	2	0	0	0	0	0	0	1	0	1	8	0	0	2	0	0	4	1	0	0	1	0	0
AT1G07730	Carubv10025518	CARHR007540	Thhalv10007858	3	0	3	0	0	0	0	0	0	0	0	0	0	0	0	0	0	0	224	247	245	557	369	356	320	250	355	652	286	222	317	220	382	595	377	328	0	0	0	0	0	0	0	0	0	0
AT1G07740	Carubv10007904	CARHR007530	Thhalv10009298	28	63	128	83	68	91	12	15	70	60	45	45	51	57	154	141	96	55	107	40	183	113	229	109	104	110	113	66	169	133	131	115	102	131	127	120	42	43	101	35	57	32	37	22	56	33
AT1G07745	Carubv10009852	CARHR007550	Thhalv10008243	308	197	298	270	253	210	334	238	257	231	228	185	378	176	261	219	186	172	95	51	33	50	76	84	112	74	120	95	88	62	82	68	136	109	91	74	63	20	57	25	35	14	34	24	51	33
AT1G07750	Carubv10009562	CARHR007580	Thhalv10008034	597	543	818	608	939	647	681	436	743	703	667	682	672	490	601	642	865	604	252	349	438	300	493	401	348	280	321	214	340	290	269	209	277	254	370	280	829	1010	1142	1639	937	962	808	600	938	1081
AT1G07770	Carubv10018235	CARHR007590	Thhalv10002722	13573	8886	13894	8000	17060	8450	14249	12879	12500	13455	14535	9392	13750	8268	7398	5599	8902	7372	3974	3097	4657	2339	3798	3220	6496	4844	3940	3318	5344	2300	3782	3611	3095	3433	3514	3153	12977	15880	10494	7781	10760	6760	11705	7570	8155	8206
AT1G07780	Carubv10001692	CARHR034480	Thhalv10014368	493	305	963	353	818	439	329	244	663	334	293	468	535	308	565	344	644	358	2168	2409	2907	3434	2301	3547	2113	2398	3825	4125	2112	2088	2591	2222	4745	4016	2319	2927	362	500	514	466	303	436	371	310	519	445
AT1G07795	Carubv10010697	CARHR007610	Thhalv10009977	0	7	6	0	13	3	5	8	2	2	22	1	18	4	11	2	6	2	7	11	7	6	2	1	5	10	9	6	0	0	7	4	4	19	4	5	0	3	6	0	2	1	3	3	1	0
AT1G07830	Carubv10018201	CARHR007640	Thhalv10009035	947	640	1133	603	1250	619	1060	902	1047	1112	960	735	1070	609	622	612	755	700	813	594	803	568	1069	961	1235	722	911	927	1252	737	999	606	810	989	946	912	1035	1140	831	504	1021	711	841	680	782	504
AT1G07840	Carubv10009657	CARHR007650	Thhalv10008245	673	551	1064	679	1504	805	684	517	846	753	1076	935	784	514	755	655	1468	731	798	620	456	772	1282	1013	1203	888	971	862	1230	635	774	591	958	1039	1002	863	913	893	923	698	1209	1157	663	508	682	704
AT1G07850	Carubv10011500	CARHR007660	Thhalv10007281	1	0	1	0	2	2	3	0	4	0	4	6	0	3	0	0	1	1	0	0	0	0	0	1	0	0	0	0	2	0	0	0	0	0	0	2	3	1	1	0	3	4	0	0	0	0
AT1G07870	Carubv10008692	CARHR007680	Thhalv10007727	247	252	478	292	536	551	181	193	273	321	237	420	249	312	283	379	502	327	378	231	374	442	419	385	427	302	479	571	359	305	408	254	552	574	436	414	189	268	254	243	763	1141	190	191	202	236
AT1G07880	Carubv10010840	CARHR007690	Thhalv10008001	174	158	354	175	201	229	296	108	330	215	177	198	207	182	257	169	225	254	185	355	271	119	145	148	162	404	223	141	156	122	113	264	163	148	229	134	169	169	193	67	117	67	147	113	123	75
AT1G07890	Carubv10009719	CARHR007700	Thhalv10008402	16718	42700	36530	49791	44062	67063	28187	30838	28307	40481	31174	54794	16972	31950	24741	48767	47964	61677	25537	46362	24488	30280	25654	40715	33836	43443	38771	33844	43147	52668	27302	37123	34712	31131	44344	60439	35851	47653	34637	40376	34707	46413	33929	34971	30040	33406
AT1G07900	Carubv10010390	CARHR007710	Thhalv10008781	5	20	21	39	9	128	5	17	12	12	26	70	1	18	8	25	10	61	3	29	2	3	17	12	2	42	10	2	14	3	2	35	1	0	6	6	1	11	0	0	2	2	4	1	4	1
AT1G07910	Carubv10007914	CARHR007720	Thhalv10006605	455	553	746	578	579	531	301	232	528	323	262	525	480	470	722	571	722	321	1229	555	356	917	1206	967	826	550	796	807	889	681	962	581	955	798	1071	687	838	855	1027	1012	1097	1440	584	517	788	752
AT1G07930	Carubv10011249	CARHR204750	Thhalv10007618	8926	7476	13244	8105	13682	8950	11768	8994	11256	12981	11787	8052	9225	9136	7621	7163	10779	8881	3881	2597	2189	2744	3812	3532	4942	3862	3479	3319	4495	3796	3592	2657	2842	3169	3668	4045	55390	56816	61688	39192	53136	31836	46317	29692	43524	24582
AT1G07950	Carubv10010555	CARHR016900	Thhalv10008938	503	473	695	547	612	445	579	401	572	582	488	507	553	407	459	470	521	412	37	11	50	31	32	33	60	34	50	26	34	26	60	24	75	66	37	38	254	205	229	208	166	111	209	119	163	187
AT1G07960	Carubv10010571	CARHR007740	Thhalv10009030	970	893	1234	1435	1378	1433	1139	1139	1086	1477	1214	1245	1207	923	936	938	1206	1008	649	688	906	719	653	996	1036	854	728	1088	882	647	832	709	962	1018	735	922	1444	1868	1282	1491	1995	2267	1250	1154	1247	1504
AT1G07970	Carubv10008478	CARHR007750	Thhalv10006976	563	379	688	395	600	368	505	354	576	459	515	403	521	408	592	530	505	323	427	229	213	336	405	256	401	288	447	367	373	257	263	253	432	429	422	314	262	257	477	251	284	187	160	140	298	163
AT1G07985	Carubv10009702	CARHR007770	Thhalv10009537	100	46	74	67	38	28	58	41	46	166	13	16	35	24	29	67	13	19	32	21	60	22	39	26	22	29	52	18	36	19	25	15	36	29	30	44	15	19	72	22	12	11	23	19	24	49
AT1G07990	Carubv10011058	CARHR007780	Thhalv10006825	1486	1824	1710	1908	1584	1707	1435	1518	1406	2132	1134	1588	1349	1651	1473	1944	1379	1170	1517	1143	605	1256	1356	1433	1885	1363	1323	1511	1139	1190	1272	1004	1312	1385	1481	1432	1539	2032	1797	1882	1907	2391	1206	1176	1388	1669
AT1G08010	Carubv10009871	CARHR007790	Thhalv10008338	627	480	627	438	963	583	584	501	585	659	683	570	658	490	446	363	562	510	478	423	204	306	732	591	605	580	467	409	687	456	500	422	511	495	649	558	370	469	498	244	408	386	326	263	294	285
AT1G08030	Carubv10011453	CARHR007800	Thhalv10007441	637	574	818	719	863	702	648	508	782	684	464	753	760	579	754	660	802	478	792	705	467	712	740	825	996	820	727	1036	748	538	703	725	845	1019	710	705	853	778	683	671	1148	1196	586	416	583	606
AT1G08035	Carubv10012236	CARHR007810	Thhalv10009338	6	6	8	6	27	19	0	4	12	12	25	14	7	4	1	8	7	5	7	3	3	10	10	9	4	6	10	9	13	10	3	5	6	15	16	12	5	2	2	3	12	2	2	2	1	2
AT1G08040	Carubv10010995	CARHR007820	Thhalv10007913	583	439	790	475	610	493	625	482	696	663	476	487	600	407	585	525	483	339	245	116	454	337	467	248	277	218	374	428	389	204	281	133	402	414	398	301	563	640	747	720	620	764	533	371	599	715
AT1G08060	Carubv10008075	CARHR007860	Thhalv10006530	486	952	712	638	503	483	350	379	461	376	359	511	430	804	743	977	837	334	1446	863	398	1168	1534	998	947	855	842	831	893	821	1030	816	1020	842	1283	972	1650	1585	2021	1535	1846	1860	1010	790	1331	945
AT1G08065	Carubv10012428	CARHR269770	Thhalv10008451	0	0	0	0	0	0	0	0	0	0	0	0	0	0	0	0	0	0	0	0	0	0	0	0	0	0	0	0	0	0	0	0	0	0	0	0	1	0	0	0	0	0	0	0	0	0
AT1G08070	Carubv10008399	CARHR007890	Thhalv10006910	29	41	146	46	85	28	19	26	102	44	25	49	53	47	132	138	47	26	127	110	148	137	204	94	109	123	176	102	123	54	94	149	152	119	165	89	130	101	170	85	104	76	119	86	157	66
AT1G08080	Carubv10012300	CARHR007900	Thhalv10009315	0	2	2	6	5	3	0	1	4	8	2	14	1	3	0	11	5	15	0	2	1	4	0	0	1	5	0	0	2	2	2	1	2	1	0	2	15	42	18	13	13	16	14	13	9	15
AT1G08110	Carubv10010424	CARHR007920	Thhalv10008645	2466	2001	2427	1545	2519	1974	2526	2287	2297	1953	1611	1898	2688	2060	2378	1840	2094	1676	921	520	988	859	656	473	551	533	789	799	506	330	800	589	1066	959	826	603	1760	2015	1916	1237	1683	1373	1625	1099	1429	1344
AT1G08125	Carubv10009772	CARHR007930	Thhalv10008555	661	396	738	509	710	445	622	419	602	667	516	613	808	411	632	638	715	500	348	197	186	414	316	322	390	244	397	516	338	200	295	229	488	399	256	283	98	130	148	103	114	91	84	57	119	105
AT1G08130	Carubv10008341	CARHR007940	Thhalv10006843	937	1305	1754	936	1305	832	814	663	1308	740	712	1037	1018	1239	1482	1328	1694	645	1565	920	767	1088	1635	862	1083	1090	1064	902	1034	673	1088	1026	1191	896	1276	890	1750	1858	1848	1520	1577	1557	1213	1192	1500	1023
AT1G08140	Carubv10012247	CARHR007960	Thhalv10009857	0	1	1	0	0	0	0	0	0	0	0	0	0	0	0	0	0	0	0	0	0	0	0	0	0	0	0	0	0	0	0	0	0	0	0	0	0	0	0	0	0	0	0	0	0	0
AT1G08150	Carubv10012128	CARHR007980	Thhalv10006822	0	0	0	0	0	0	0	7	0	0	0	0	0	0	0	0	0	0	1	0	0	0	0	0	0	1	0	2	0	0	0	0	0	0	0	0	185	231	214	165	295	296	156	142	138	118
AT1G08160	Carubv10010243	CARHR007990	Thhalv10009522	237	316	366	166	379	212	146	112	193	201	102	169	192	238	191	169	230	130	113	149	112	115	131	139	55	86	91	83	57	65	106	77	82	72	131	64	125	202	206	94	133	79	46	73	49	50
AT1G08170	Carubv10011530	CARHR008000	Thhalv10008775	3	1	1	0	1	0	0	0	0	0	6	0	0	1	0	0	0	0	1	0	3	3	0	1	0	3	1	0	0	1	1	0	2	1	1	0	14	10	3	3	16	8	11	3	5	4
AT1G08180	Carubv10010984	CARHR008010	Thhalv10009156	255	140	214	215	257	279	312	146	200	232	178	197	251	145	145	224	163	248	114	78	46	50	41	45	52	45	57	49	31	12	109	59	102	48	60	68	449	331	463	349	377	334	418	163	392	365
AT1G08190	Carubv10011806	CARHR008020	Thhalv10006697	2393	3162	3377	2666	3289	2986	2316	1985	2279	2205	2464	2648	2370	3030	2654	2915	3835	2192	2683	1970	1303	2445	2511	1960	2206	1914	2054	2154	1779	1499	2079	1783	2145	2004	2102	1803	1870	2206	2795	1970	2833	2658	1613	1229	1904	1454
AT1G08200	Carubv10009400	CARHR008030	Thhalv10007880	4742	5272	6259	3717	7444	4812	5220	4158	5375	3635	5768	5314	4667	5172	4053	3892	6416	4449	5890	4818	7859	6381	9254	7335	6315	4740	7700	6499	9304	5484	5964	4294	7640	5732	9197	6676	3379	4210	5425	3868	5216	4473	3224	2662	3554	3133
AT1G08210	Carubv10008955	CARHR008040	Thhalv10007475	806	819	956	779	578	446	639	596	835	778	402	466	794	756	875	769	452	392	501	411	709	609	334	251	448	433	890	606	276	215	462	454	1014	655	312	253	531	491	660	502	400	293	445	276	444	429
AT1G08220	Carubv10009984	CARHR008050	Thhalv10008429	280	336	608	261	519	371	261	276	430	279	347	351	331	272	336	289	523	288	450	476	480	338	472	437	542	629	512	397	461	289	377	575	389	403	431	412	457	376	365	249	400	445	325	263	352	270
AT1G08230	Carubv10009101	CARHR008060	Thhalv10007611	457	393	833	1013	1142	1073	491	515	864	1226	509	836	306	338	715	856	622	658	162	140	175	253	364	353	216	177	270	244	318	214	275	156	314	217	381	372	114	181	145	396	419	544	134	84	148	310
AT1G08260	Carubv10008067	CARHR008100	Thhalv10006524	713	864	1223	594	955	650	526	551	851	467	672	730	634	965	821	809	897	384	1510	701	425	958	1487	662	1103	774	831	762	872	560	881	737	826	686	1092	550	647	603	1064	620	755	400	393	276	625	373
AT1G08280	Carubv10009362	CARHR008130	Thhalv10007826	420	297	470	369	507	349	273	214	421	326	253	355	380	324	315	418	540	290	284	151	117	133	277	179	212	160	233	136	237	184	254	145	191	152	241	161	101	123	83	40	117	53	70	69	35	32
AT1G08290	Carubv10009617	CARHR008140	Thhalv10008125	63	114	133	82	157	85	86	74	82	44	49	100	34	131	70	64	112	86	40	48	25	45	77	42	20	29	7	14	23	22	24	66	18	17	51	55	29	124	53	68	80	73	35	51	42	50
AT1G08300	Carubv10011774	CARHR008150	Thhalv10006953	308	355	322	241	381	268	228	255	246	154	205	258	351	271	287	190	416	243	57	53	18	16	85	49	116	73	26	24	78	40	75	43	43	32	80	58	108	59	121	108	103	130	55	45	71	52
AT1G08310	Carubv10010878	CARHR008170	Thhalv10008270	28	27	45	31	74	69	47	31	73	24	34	51	35	31	32	23	53	40	47	16	16	15	23	36	32	19	14	28	14	12	21	25	14	13	30	23	6	42	33	27	8	30	7	32	29	37
AT1G08315	Carubv10011052	CARHR008200	Thhalv10010031	201	778	389	551	226	394	161	470	335	450	174	284	256	702	308	604	207	282	180	2150	249	364	124	424	212	2164	219	476	131	294	207	1775	246	497	151	323	234	584	293	412	245	453	264	289	260	323
AT1G08320	Carubv10011576	CARHR008210	Thhalv10007490	248	495	437	556	333	463	310	257	299	511	212	328	314	323	315	438	256	214	92	217	279	222	143	373	211	237	116	221	103	281	133	218	91	193	165	167	289	638	484	329	457	563	257	397	328	359
AT1G08340	Carubv10009491	CARHR008220	Thhalv10008285	52	126	131	80	114	79	196	117	114	54	226	56	128	98	93	50	100	35	19	28	29	10	28	8	35	39	45	11	28	2	15	16	20	22	22	20	35	75	67	39	56	38	39	52	25	42
AT1G08350	Carubv10008667	CARHR008230	Thhalv10007170	326	546	426	305	410	349	326	454	347	337	196	408	330	491	372	345	332	210	255	161	260	269	249	206	226	178	325	390	207	157	202	135	275	385	169	140	402	471	521	551	393	456	327	252	373	413
AT1G08370	Carubv10009516	CARHR008250	Thhalv10007986	1024	1145	1260	1047	1406	1001	1287	1091	1035	1188	1139	1140	1060	1137	937	1041	1295	1065	1242	1245	518	894	794	1094	1287	1475	910	975	960	957	1093	1043	993	1023	1085	1008	656	842	949	1063	1023	1618	488	585	729	684
AT1G08380	Carubv10010597	CARHR008270	Thhalv10009047	55723	42483	22957	11469	27217	20940	61963	44919	20175	14631	30815	26020	54996	39271	16511	13031	18273	21419	71991	45094	25699	11162	28583	19523	38093	28731	24240	13641	19725	12626	49693	33696	23028	13114	43719	22895	40066	45942	25500	10572	15285	7397	47236	22359	16027	8924
AT1G08390	Carubv10010612	CARHR008260	Thhalv10009077	203	126	146	77	153	96	195	135	142	99	151	135	230	109	70	67	81	121	266	148	105	51	110	100	250	134	97	81	98	68	219	115	83	104	151	124	274	275	190	167	120	100	277	111	149	227
AT1G08400	Carubv10008321	CARHR008280	Thhalv10006826	202	239	271	198	239	173	158	111	183	144	117	233	225	251	189	190	272	148	239	136	129	113	269	191	255	175	160	119	191	145	245	133	188	122	223	194	261	273	213	191	230	272	179	169	179	132
AT1G08410	Carubv10012258	CARHR008290	Thhalv10007194	725	663	1532	929	1730	1167	550	467	1052	909	1012	1146	704	629	991	867	1572	833	667	358	442	692	2170	1168	931	616	683	664	1381	927	818	485	689	666	942	999	1144	1258	1447	967	1868	1653	834	783	1071	789
AT1G08420	Carubv10008182	CARHR008300	Thhalv10006669	1666	2518	2502	2701	2313	2196	1587	1635	1876	2363	1489	2222	1930	2297	2224	2544	2743	1680	2053	2044	1055	1765	2168	2307	2174	2245	1550	2014	1990	1648	1958	1762	1681	1777	2177	2219	1496	2138	1972	1542	2473	3017	1113	1283	1402	996
AT1G08440	Carubv10011859	CARHR008320	Thhalv10009830	0	1	2	0	1	0	1	0	2	0	0	6	9	1	0	0	8	1	4	9	1	0	27	16	1	8	3	2	22	5	5	1	0	3	8	4	11	25	13	0	82	21	14	2	4	0
AT1G08450	Carubv10009219	CARHR008330	Thhalv10007710	1152	4294	1723	1860	1425	1807	1205	2746	1428	1646	1030	1919	1172	3543	1405	2030	1170	1599	4002	9470	4198	2522	3058	3614	4187	9141	2940	1908	2101	2238	2382	6977	2340	2363	2539	3158	2309	9466	2325	5735	3168	7746	1872	6132	2104	4267
AT1G08460	Carubv10009385	CARHR008340	Thhalv10007924	486	536	499	459	401	404	434	459	412	452	267	392	528	441	371	567	383	359	419	371	179	248	267	238	315	304	257	266	256	149	258	310	314	246	284	267	232	340	246	191	228	277	232	198	177	181
AT1G08465	Carubv10010384	CARHR008350	Thhalv10008858	228	281	395	202	317	289	239	188	355	182	135	283	270	262	310	254	283	220	535	264	505	458	470	448	253	158	434	373	368	228	426	250	589	378	534	353	357	381	484	391	339	282	353	202	347	303
AT1G08470	Carubv10009397	CARHR008360	Thhalv10007865	444	349	805	427	597	461	437	370	595	433	345	500	467	393	562	449	603	312	606	341	315	356	648	456	740	294	478	492	599	325	640	276	507	391	648	486	506	344	681	320	516	273	453	216	500	292
AT1G08480	Carubv10010583	CARHR008370	Thhalv10019305	2316	1969	3257	2424	3392	2631	3567	2388	3127	3102	2789	2501	2035	2147	1789	2285	2124	2411	2790	2870	5306	3354	2496	3149	3946	3122	3821	4562	3729	2394	3089	2443	3776	4309	2934	3374	1622	1902	2217	2502	2373	2411	1580	1209	2076	2084
AT1G08490	Carubv10012604	CARHR008380	Thhalv10007548	1434	1914	2255	1768	1704	1641	1408	1345	1736	1676	1056	1590	1565	1721	1886	1979	1600	1224	1500	802	784	1111	1564	886	877	887	1141	948	1180	805	1180	861	1183	956	1410	889	967	1124	1479	940	1045	914	952	719	1132	842
AT1G08500	Carubv10010188	CARHR008390	Thhalv10008399	70	57	195	58	126	53	63	48	116	73	71	49	98	44	103	52	85	27	88	137	210	123	122	82	121	59	190	132	99	65	132	108	266	127	69	64	63	39	61	15	33	5	38	18	32	15
AT1G08510	Carubv10009296	CARHR008410	Thhalv10007761	2844	3679	3472	2223	3244	2920	2326	2017	2451	2035	1866	2887	3263	3327	2828	2342	3515	2035	2285	2634	1652	1573	3622	2581	1943	2784	1445	1600	2397	1493	2321	2715	1500	1115	3107	1898	294	323	558	364	579	463	276	207	397	138
AT1G08520	Carubv10008387	CARHR008420	Thhalv10006894	5671	5069	6022	2989	4374	3067	5685	4111	5508	4198	4256	3257	5584	5146	5208	4406	3390	2258	11411	6029	2978	6202	7493	3434	6243	5366	6571	5347	4580	2275	6638	5631	7132	5580	6339	3526	7446	8085	9590	4536	4689	3135	7045	4469	5630	4431
AT1G08530	Carubv10010041	CARHR008430	Thhalv10008466	264	226	421	359	278	247	345	275	383	334	263	290	338	286	328	325	281	213	430	280	442	304	334	267	520	348	344	332	367	238	446	296	402	342	366	304	384	333	392	386	270	203	338	180	375	349
AT1G08540	Carubv10008711	CARHR008440	Thhalv10007187	2904	2448	3655	1937	2244	2238	3020	2129	3247	2290	2080	2401	3579	2738	3439	3176	2765	1829	6851	3682	4044	5876	5202	3226	4855	3682	6359	6248	5079	2730	5320	3803	7308	5545	6330	4279	4424	4072	5684	3260	3031	1970	4331	2377	4229	3529
AT1G08550	Carubv10009082	CARHR008450	Thhalv10007587	985	632	3792	2501	767	774	1082	743	3602	3256	902	911	1047	773	3606	3151	845	497	1072	936	3407	4498	1308	1188	1158	1179	5779	4919	1328	910	1029	1257	5523	4181	1392	1449	508	454	4665	1990	298	253	627	248	2981	2264
AT1G08560	Carubv10012277	CARHR008460	Thhalv10008289	738	619	1454	300	717	241	585	563	1353	522	412	519	853	650	634	270	372	314	961	515	1080	363	448	261	503	535	1125	395	569	180	454	472	759	581	404	223	346	248	398	147	181	69	315	148	247	207
AT1G08570	Carubv10009966	CARHR008470	Thhalv10008616	1186	1314	1919	1980	2822	2121	878	878	1841	1758	815	1846	1136	950	1752	1985	2186	1452	3185	1979	1793	1464	3231	3047	2063	1638	1655	1425	1748	1989	2015	1790	1211	873	4242	3003	850	1702	1401	1338	1380	1540	891	757	838	1262
AT1G08580	Carubv10010661	CARHR008480	Thhalv10009120	1419	947	2670	1470	3746	2206	1527	1109	2150	1706	1958	2019	1816	932	1299	1158	2315	1811	657	510	1061	667	1454	1319	1435	909	906	915	1801	703	846	563	741	988	801	1010	1585	1608	1288	860	1869	1378	1312	946	1141	911
AT1G08590	Carubv10008171	CARHR008490	Thhalv10006658	110	163	244	59	213	112	130	42	140	28	80	91	167	142	225	95	333	68	66	16	20	34	77	25	59	12	62	16	35	24	44	13	48	31	49	18	112	69	156	51	156	84	77	28	50	41
AT1G08600	Carubv10011116	CARHR008510	Thhalv10006555	1006	1200	1548	1339	1227	1034	884	642	1072	866	487	1121	1080	1233	1552	1646	1889	767	946	510	359	1110	1198	767	548	551	679	743	637	503	610	580	800	846	953	686	1100	1094	1406	1227	1437	1690	729	628	1000	1008
AT1G08610	Carubv10012539	CARHR008520	Thhalv10007213	462	195	657	256	655	417	351	181	490	329	337	391	523	182	509	388	630	285	356	65	283	284	693	409	520	180	335	334	435	218	424	130	451	399	395	318	487	152	399	157	489	330	327	110	310	146
AT1G08620	Carubv10008112	CARHR008530	Thhalv10006592	728	1496	1115	1147	1209	1321	557	619	749	757	547	1106	758	1325	1026	1279	1436	757	1012	1316	279	995	1265	1219	658	1294	539	689	758	863	734	1107	838	801	980	994	874	1460	952	929	2247	2623	603	742	677	739
AT1G08630	Carubv10009546	CARHR008540	Thhalv10008026	635	2632	2358	6621	440	625	478	1840	1650	9283	195	836	575	1552	4189	9743	418	565	1115	2303	2877	3702	968	473	620	1227	2545	3167	1268	268	1209	2537	4121	3082	956	501	693	2127	1546	2930	334	1524	628	757	986	4052
AT1G08640	Carubv10009875	CARHR008550	Thhalv10008167	3336	2953	5416	3101	4899	3247	4482	3319	4731	4069	4116	2932	4113	2603	3623	2920	3339	2309	2654	1372	2214	1344	2194	1272	2410	1711	2025	1602	2066	913	2185	1567	2516	1944	2132	1261	2041	1742	2415	932	1153	558	2039	1225	1880	1004
AT1G08650	Carubv10009932	CARHR008580	Thhalv10008405	540	392	465	305	1906	1281	379	274	461	287	1166	1057	415	268	290	261	1508	764	299	215	291	108	760	491	283	254	244	122	697	417	286	149	145	77	688	357	155	128	155	74	597	500	93	50	105	39
AT1G08660	Carubv10009038	CARHR008590	Thhalv10007525	1331	699	1650	981	1020	750	1435	1016	1453	1344	860	842	1341	672	1144	979	794	657	920	681	587	655	528	538	1143	824	959	973	608	498	852	577	946	938	755	675	606	602	739	659	631	661	485	366	615	693
AT1G08670	Carubv10011520	CARHR008600	Thhalv10008666	27	78	42	85	63	90	48	66	23	132	63	96	55	30	38	88	72	65	24	27	61	44	51	49	49	38	25	67	44	52	48	32	28	73	33	63	61	89	69	67	76	110	33	39	56	65
AT1G08680	Carubv10008548	CARHR008610	Thhalv10007026	972	1171	1347	1089	971	795	974	896	1100	900	676	863	1012	1166	1364	1433	1144	700	976	541	496	1211	801	590	706	489	930	1049	516	491	861	549	1372	1165	914	631	645	701	940	737	715	785	522	366	660	616
AT1G08695	Carubv10012032	CARHR039790	Thhalv10023088	0	0	0	0	1	0	0	0	0	0	0	0	0	0	0	0	0	0	0	0	0	0	0	1	0	0	0	0	0	1	0	0	0	0	0	0	0	0	0	0	0	0	0	0	0	0
AT1G08700	Carubv10009057	CARHR008620	Thhalv10007596	1069	906	1029	867	951	953	898	702	822	723	556	979	1125	853	810	931	995	874	682	433	313	475	758	659	532	409	451	423	679	637	586	428	489	420	710	727	678	1061	784	747	795	1236	598	655	594	647
AT1G08710	Carubv10009806	CARHR008630	Thhalv10008513	422	383	499	465	332	414	288	365	393	370	155	337	444	368	429	430	395	280	264	285	201	287	279	377	379	357	310	439	245	280	322	302	362	368	310	411	428	759	477	489	484	641	328	432	389	495
AT1G08720	Carubv10008230	CARHR008640	Thhalv10006727	525	1099	875	954	453	473	478	568	658	595	262	547	465	996	991	1181	605	387	714	1027	580	942	605	707	713	1106	713	884	442	537	586	880	838	832	609	666	652	1681	877	980	611	1036	537	1244	681	787
AT1G08730	Carubv10011892	CARHR214520	Thhalv10006560	43	21	56	12	49	41	24	15	45	15	68	51	35	42	32	27	39	14	7	2	0	2	8	5	3	9	2	3	6	5	5	10	1	0	3	2	0	2	0	0	0	0	0	2	0	0
AT1G08750	Carubv10009426	CARHR008670	Thhalv10007907	347	376	609	472	543	449	381	386	514	450	263	406	516	367	431	491	489	272	443	398	412	404	403	440	684	505	469	619	425	280	465	349	577	569	384	378	908	986	1060	994	901	1007	772	545	822	967
AT1G08760	Carubv10008392	CARHR008680	Thhalv10006887	544	469	656	588	754	690	467	329	519	443	433	548	597	403	629	679	825	380	864	385	451	836	1381	1000	729	360	577	717	817	758	741	352	734	602	813	805	624	608	874	765	1109	1310	594	305	652	568
AT1G08770	Carubv10010304	CARHR008690	Thhalv10008786	330	502	365	454	421	387	390	334	317	412	253	324	308	396	365	378	333	374	425	301	565	292	230	264	406	264	403	418	351	383	423	270	484	382	336	360	1093	2291	1171	1301	1272	1672	1097	1089	1018	1262
AT1G08780	Carubv10010510	CARHR008700	Thhalv10009095	962	692	1141	692	1162	650	1044	819	1092	1078	1017	821	969	677	635	635	787	689	1330	1021	1040	892	894	967	1998	1214	1401	1304	1485	611	1325	1160	1209	1325	1189	1051	1396	1547	1400	1077	1239	891	1186	826	1154	1168
AT1G08790	Carubv10011157	CARHR008710	Thhalv10009929	0	0	0	0	0	0	0	0	0	0	0	0	0	0	0	0	0	0	0	0	0	0	0	0	0	0	0	0	0	0	0	0	0	0	0	0	0	0	0	0	0	0	0	0	0	0
AT1G08800	Carubv10008154	CARHR008720	Thhalv10006726	686	2190	1366	2695	1045	1980	539	734	1034	930	422	1303	745	1530	1607	2205	1567	883	567	941	686	845	1162	1436	665	1163	605	885	759	874	647	1001	642	649	835	1003	891	2171	1200	1609	2262	4062	745	1292	1077	1098
AT1G08810	Carubv10009957	CARHR008730	Thhalv10008426	404	360	426	268	546	342	402	315	454	406	226	282	383	364	406	274	367	247	573	388	263	277	635	544	433	348	444	398	466	256	621	468	470	347	584	404	227	332	114	116	192	165	203	158	79	189
AT1G08820	Carubv10009369	CARHR008740	Thhalv10007714	962	1358	1288	1554	1014	1330	830	951	1109	1393	633	1127	971	1120	1085	1620	1200	880	1144	835	902	1165	1097	1079	1092	1038	1234	1276	1109	767	1067	936	1485	1504	1248	1144	1398	2050	1635	1506	2107	2769	1170	1219	1319	1665
AT1G08830	Carubv10010551	CARHR008750	Thhalv10008927	6225	8896	10673	14900	11456	17630	3835	4687	5087	11699	5104	9220	4338	4352	5491	12575	7511	10925	4139	8891	6507	9478	5128	14358	5383	8348	4517	10828	5646	10976	3037	5638	6023	9904	6017	8368	3143	11113	5242	10809	4964	10003	2449	6126	3273	9459
AT1G08840	Carubv10011024	CARHR008760	Thhalv10006571	269	224	550	329	421	259	258	168	422	315	306	315	192	273	391	310	312	203	819	504	421	1249	1014	1195	728	615	800	1493	692	789	682	561	1180	1334	804	920	719	833	907	599	752	714	446	423	677	483
AT1G08845	Carubv10010378	CARHR008770	Thhalv10001765	224	209	311	175	318	268	178	179	296	219	191	263	228	180	214	204	278	227	606	322	500	493	758	717	716	415	569	601	693	474	592	290	616	628	522	643	324	254	503	314	237	206	265	131	447	369
AT1G08860	Carubv10008668	CARHR008780	Thhalv10007173	0	48	10	20	1	8	0	15	6	4	0	15	0	79	5	13	4	12	18	35	26	7	20	45	13	104	26	13	19	46	13	67	17	6	25	49	1	7	2	12	3	17	1	5	2	8
AT1G08910	Carubv10008291	CARHR008810	Thhalv10007035	904	585	1380	1087	1257	950	868	455	1153	869	930	890	886	644	889	783	1193	743	997	504	194	556	659	562	680	721	532	575	416	422	736	649	730	564	669	643	182	188	187	105	152	116	137	96	113	78
AT1G08920	Carubv10010993	CARHR008830	Thhalv10007539	585	1073	906	1234	694	548	391	492	672	746	397	418	449	632	593	666	429	258	374	521	710	567	675	712	242	580	421	537	293	457	258	438	292	439	849	816	291	875	744	2292	3057	5011	302	689	831	1737
AT1G08940	Carubv10009965	CARHR008850	Thhalv10008391	218	2335	525	1591	380	1429	204	1312	364	1017	234	976	258	1783	329	1249	266	832	197	3969	356	489	209	1135	221	3465	467	566	136	620	178	3367	422	477	151	580	57	1125	121	319	250	915	57	834	81	314
AT1G08960	Carubv10008760	CARHR008860	Thhalv10007271	348	397	432	313	348	244	262	170	307	180	248	373	416	376	360	311	434	269	406	509	199	214	212	260	379	433	304	260	262	265	408	429	291	164	288	333	421	818	372	428	600	868	373	456	387	259
AT1G08970	Carubv10010196	CARHR008870	Thhalv10008649	1045	1155	1439	957	1092	951	896	914	1293	1228	868	1053	1022	957	836	1016	943	945	534	308	250	361	704	544	562	319	387	390	580	437	460	214	346	323	594	570	693	1019	669	656	774	660	670	454	527	580
AT1G08980	Carubv10009223	CARHR008880	Thhalv10007679	790	708	2908	1871	481	413	701	797	2612	1877	342	517	883	899	3019	2763	424	428	1408	757	1082	1416	599	442	1023	713	1379	1079	672	387	1159	595	1501	1084	1018	546	1446	1108	3046	1357	420	208	1332	496	1802	1660
AT1G08985	Carubv10002886	CARHR123550	Thhalv10012253	0	0	0	0	0	0	0	0	0	0	0	0	0	0	0	0	0	0	0	0	0	0	0	0	0	0	0	0	0	0	0	0	0	0	0	0	0	0	0	0	0	0	0	0	0	0
AT1G08990	Carubv10011725	CARHR008890	Thhalv10007230	65	117	204	49	207	98	103	71	133	37	174	55	146	108	149	73	230	67	2	1	12	10	20	2	9	9	7	5	12	7	6	13	5	8	11	3	24	99	26	7	40	16	18	24	11	10
AT1G09010	Carubv10008228	CARHR008900	Thhalv10006730	1610	1516	2512	1945	1143	1060	1810	1199	2141	1970	721	1222	1778	1484	2575	2846	1221	840	1785	1401	1018	1507	1275	954	1371	1438	1495	1355	895	800	1216	1297	1624	1290	1138	871	940	840	1293	1305	801	716	794	357	975	916
AT1G09020	Carubv10008946	CARHR008910	Thhalv10007484	1234	1663	1774	1396	1586	1426	1212	1121	1380	1369	1397	1541	1277	1573	1461	1617	1919	1170	2545	2006	1373	2158	2759	2363	2545	2229	2166	2285	2511	2013	2368	1978	2352	2126	2789	2376	2307	2632	3001	2620	2917	3055	1890	1736	2243	1947
AT1G09030	Carubv10011185	CARHR008930	Thhalv10009804	1	0	0	0	0	0	0	0	0	4	0	0	0	0	0	0	0	0	0	0	3	0	0	2	0	1	0	0	1	1	0	1	0	0	0	0	2	0	0	0	2	0	1	2	0	0
AT1G09040	Carubv10012573	CARHR008940	Thhalv10006718	120	193	202	211	136	123	77	131	201	200	82	161	174	157	252	243	203	100	154	155	125	250	231	189	129	197	201	182	87	82	121	173	280	148	173	154	187	300	332	326	312	520	179	158	226	262
AT1G09060	Carubv10011895	CARHR008950	Thhalv10006723	1276	1682	1692	1253	1745	1733	1269	1207	1316	1226	1239	1435	1216	1660	1681	1514	1307	1001	2063	1710	789	1810	1739	1676	1571	1558	1946	1877	1178	1491	1577	1694	2054	1758	1589	1574	1093	1494	1317	1252	1193	1186	937	750	1024	1123
AT1G09070	Carubv10009766	CARHR008960	Thhalv10008221	2129	9579	4840	6444	3278	4474	1906	5169	3804	2968	1328	4019	2227	9564	4222	4927	3459	3934	847	3289	2793	1684	1380	1899	818	3549	2018	1973	825	1688	975	3234	1710	1890	1119	2305	1191	4224	2454	2744	4385	8583	1363	2689	1740	1911
AT1G09080	Carubv10008520	CARHR008970	Thhalv10009566	42	235	18	407	169	659	61	117	8	189	334	716	51	59	6	384	461	1128	115	1613	89	96	116	844	649	2162	119	234	211	735	176	205	45	52	128	1172	2575	1915	64	1529	286	904	932	1188	247	759
AT1G09090	Carubv10008289	CARHR008980	Thhalv10006793	199	334	445	598	245	463	328	159	295	244	213	396	177	115	301	504	419	212	152	199	272	238	197	184	234	169	157	171	162	163	184	125	187	219	186	175	159	159	438	387	406	369	139	100	259	265
AT1G09130	Carubv10011543	CARHR009000	Thhalv10008180	3549	4251	5874	4367	4506	3998	4766	4372	5392	4722	3122	3567	4432	3907	4699	4766	3495	2831	5776	4173	2598	3350	3848	2814	4514	4314	4910	3983	3227	2022	4298	4044	5056	4038	3822	2519	3454	3696	4559	3205	3115	2996	3812	2477	3711	2988
AT1G09140	Carubv10009803	CARHR009010	Thhalv10008203	5075	5062	3851	3578	5132	3875	4460	3869	3055	3553	2575	3790	4552	3359	3404	3035	6049	4426	3513	4024	993	1859	1355	2176	3572	4036	2213	2424	1656	1735	2852	2958	2560	2449	2917	3077	2624	2833	1024	866	2795	2771	2262	1395	823	946
AT1G09150	Carubv10010413	CARHR009020	Thhalv10008886	1255	866	1495	929	1396	946	1544	1135	1392	1474	1552	1056	1266	835	941	922	1033	798	1172	754	1207	775	1021	874	1275	1003	1088	1016	1327	773	1003	783	998	994	1071	863	1512	1630	1736	1611	1595	1459	1432	963	1431	1578
AT1G09155	Carubv10009939	CARHR009080	Thhalv10008383	24	32	46	2	66	33	29	45	50	41	51	55	70	24	41	19	31	31	31	1650	75	110	28	289	38	1752	72	208	10	67	52	1548	47	108	37	106	1	184	12	54	12	86	5	238	4	94
AT1G09157	Carubv10007365	CARHR262660	Thhalv10027899	2	0	0	1	5	6	2	4	0	0	0	3	0	4	2	0	7	0	0	1	0	0	1	0	0	0	0	0	0	0	1	0	0	0	0	0	0	0	0	0	0	0	0	1	0	0
AT1G09160	Carubv10009213	CARHR009090	Thhalv10007698	1587	1035	1374	834	1297	1092	1233	935	1141	751	1001	1160	1534	1183	961	756	1377	842	672	277	534	423	570	355	572	335	565	441	495	289	570	252	580	554	657	450	1489	2170	1286	878	1593	1747	1222	1347	1081	871
AT1G09170	Carubv10011730	CARHR009100	Thhalv10006679	10	27	58	24	40	20	5	6	35	10	22	23	17	28	27	38	62	8	4	7	15	7	21	4	13	9	9	7	4	3	9	7	10	9	8	3	26	75	47	23	46	29	22	43	15	22
AT1G09190	Carubv10012008	CARHR009130	Thhalv10009682	66	72	326	144	119	106	95	88	270	121	42	94	150	101	200	208	125	105	142	103	78	117	128	77	59	65	135	142	81	67	141	103	237	159	92	83	307	358	444	198	322	181	249	168	341	182
AT1G09195	Carubv10011869	CARHR009150	Thhalv10007209	226	451	363	521	174	233	155	215	286	255	103	214	208	329	340	496	173	150	293	137	191	363	182	209	181	183	313	270	125	154	232	167	396	302	176	209	0	0	0	0	0	0	0	0	0	0
AT1G09200	Carubv10018763	CARHR009160	Thhalv10029057	1786	1573	2538	1104	1567	571	1797	1280	2571	813	1152	1194	1780	1534	932	945	1030	900	986	629	2837	692	562	298	487	565	1436	663	614	313	515	565	777	527	451	263	0	0	0	0	0	0	0	0	0	0
AT1G09210	Carubv10011053	CARHR009170	Thhalv10007717	6895	6228	6487	6055	8388	6288	7670	5508	5252	5320	6477	7815	6578	4650	2841	5312	8389	6514	7577	6623	5848	6987	4500	4325	9113	5880	6457	5855	5199	4807	5069	2717	4877	4334	4721	4869	22084	25358	9468	16667	5760	6636	15055	13541	9881	8985
AT1G09220	Carubv10012313	CARHR009180	Thhalv10007397	30	58	117	49	53	71	40	28	95	76	29	49	57	42	109	112	77	31	89	48	22	96	105	85	42	40	55	40	52	47	56	53	77	61	64	58	0	0	0	0	0	0	0	0	0	0
AT1G09230	Carubv10011629	CARHR009190	Thhalv10007645	871	439	770	638	753	634	1213	597	749	799	550	542	866	470	717	665	648	511	296	95	107	255	358	254	218	136	260	190	336	128	223	93	281	186	367	254	256	275	364	279	348	265	258	201	226	209
AT1G09240	Carubv10009752	CARHR009200	Thhalv10008206	86	137	323	225	268	199	74	37	155	121	63	245	130	146	189	239	268	247	25	27	22	34	75	242	17	11	9	30	56	74	14	15	11	10	61	78	114	319	554	513	964	929	205	188	245	363
AT1G09250	Carubv10010314	CARHR009230	Thhalv10008777	563	615	396	396	650	519	607	369	356	305	319	573	603	543	316	395	595	592	481	208	357	218	432	277	148	87	213	209	171	217	272	115	256	205	354	266	590	901	176	161	1028	814	533	437	126	152
AT1G09270	Carubv10011976	CARHR009240	Thhalv10007310	1911	2885	2687	2656	2898	2618	2137	2309	2152	2579	1943	2641	1992	2353	2040	2678	2756	2094	1820	1601	976	1450	1772	1546	1627	1766	1382	1321	1498	1261	1512	1481	1428	1273	1725	1592	2030	2675	2467	2294	2749	3046	1644	1489	1934	1796
AT1G09280	Carubv10012485	CARHR009250	Thhalv10007152	813	648	878	688	692	551	633	477	740	599	452	556	768	673	921	911	591	388	784	529	442	849	848	550	590	474	648	667	633	513	674	505	1081	761	645	628	461	360	475	366	427	348	362	167	387	325
AT1G09290	Carubv10009568	CARHR009260	Thhalv10008047	415	297	633	418	646	427	435	272	526	426	350	443	534	352	579	544	638	365	243	166	333	228	333	264	331	162	321	258	266	231	281	171	369	343	268	289	334	221	352	274	321	340	241	134	245	248
AT1G09300	Carubv10009008	CARHR009270	Thhalv10007508	299	368	686	381	586	435	385	317	503	412	419	435	436	355	450	561	565	360	304	198	263	310	620	419	458	364	270	328	450	264	349	246	392	361	385	337	848	820	782	603	820	717	612	517	632	481
AT1G09310	Carubv10010410	CARHR009290	Thhalv10008903	7690	7393	9474	2918	8266	6175	11672	6276	9603	3068	7539	8360	9159	7397	6157	3236	9045	7108	6974	3656	3863	529	6790	2216	5849	2973	2456	888	6869	1543	8151	3891	2052	885	7909	2882	2015	2385	1353	153	3988	688	2939	1250	924	200
AT1G09320	Carubv10008882	CARHR009280	Thhalv10009728	276	305	580	477	434	285	233	326	503	525	289	286	325	338	486	372	287	202	164	112	79	150	296	186	203	123	248	169	204	119	175	126	217	224	175	143	100	104	114	74	167	64	113	68	62	61
AT1G09330	Carubv10012409	CARHR009300	Thhalv10010041	931	1471	1536	1399	1565	1677	1109	1221	1199	1519	1021	1439	1237	1280	1067	1283	1495	1283	830	1062	1073	754	691	736	1079	1374	988	927	1014	776	936	983	932	992	907	883	1571	2329	1648	1924	1935	2429	1491	1525	1605	1840
AT1G09340	Carubv10009455	CARHR009310	Thhalv10007937	12941	14013	15074	7818	12752	10622	16277	13093	14699	9177	12316	11948	15400	14710	14864	11001	11114	9582	21192	13447	12018	21454	20585	12448	11552	11136	23839	19382	15754	9567	16701	12148	29434	19314	28382	16024	8208	10176	14508	5034	6132	4673	10043	6526	9680	5906
AT1G09350	Carubv10009676	CARHR009320	Thhalv10008154	6	14	0	1	40	12	9	5	5	0	30	14	8	2	0	1	37	9	0	0	0	0	1	7	0	1	0	0	4	0	0	2	0	0	2	2	76	66	43	3	277	243	48	34	43	8
AT1G09360	Carubv10011513	CARHR178520	Thhalv10009592	0	0	0	0	0	0	0	0	0	0	0	0	0	0	0	0	0	0	0	0	0	0	0	0	0	0	0	0	0	0	0	3	0	0	0	0	0	0	0	0	0	0	0	0	0	0
AT1G09370	Carubv10010434	CARHR009330	Thhalv10009653	1	5	1	2	3	0	0	3	0	0	3	0	0	2	2	0	0	0	186	665	516	248	72	155	96	469	158	171	48	96	214	746	235	221	123	107	12	73	22	25	13	39	13	21	13	17
AT1G09380	Carubv10009476	CARHR009340	Thhalv10007900	2	6	7	0	4	3	1	1	5	0	0	2	7	4	5	2	21	3	199	138	298	253	31	28	58	65	381	247	29	11	183	144	799	406	101	49	5	10	25	5	3	4	5	9	1	3
AT1G09390	Carubv10011694	CARHR009350	Thhalv10007968	439	335	262	99	326	222	466	327	259	149	264	275	506	351	196	162	244	208	112	91	146	72	125	127	114	97	136	108	137	85	107	89	92	102	176	70	108	121	113	49	104	71	120	75	70	46
AT1G09400	Carubv10009647	CARHR009360	Thhalv10009352	1	8	1	15	17	16	13	15	5	14	12	16	4	7	5	18	11	12	349	304	1183	1224	326	177	461	602	1706	1341	199	197	223	563	1181	1078	198	339	204	332	144	297	294	452	174	217	179	298
AT1G09420	Carubv10011205	CARHR009380	Thhalv10007053	561	524	808	1170	438	513	532	526	671	1138	340	490	464	466	568	1276	332	372	583	405	251	582	461	359	354	355	438	478	256	223	418	395	602	552	430	332	741	939	880	966	202	284	855	500	515	1019
AT1G09430	Carubv10009231	CARHR009400	Thhalv10007711	2152	4623	3486	6219	2957	4282	2958	3135	3099	5769	1902	3682	2613	3442	3448	6726	3003	3147	1849	1223	1344	1596	1415	1840	1766	1316	1564	1794	1216	1411	1600	1184	1568	1353	1458	1710	1177	1779	1289	1838	1598	2795	1231	974	1086	1188
AT1G09440	Carubv10009469	CARHR009410	Thhalv10007579	200	214	317	156	175	149	170	131	220	113	146	156	238	198	302	181	253	112	937	332	726	613	572	432	701	267	815	632	393	312	899	310	941	582	625	400	68	80	82	62	60	53	66	59	53	41
AT1G09450	Carubv10008644	CARHR009420	Thhalv10007117	170	92	204	50	190	43	165	128	204	69	200	87	161	132	98	49	70	51	83	56	90	77	93	67	80	90	101	70	76	33	77	52	83	79	69	51	109	109	63	41	48	17	72	62	56	20
AT1G09460	Carubv10009486	CARHR009440	Thhalv10008261	560	888	556	449	407	324	853	630	479	501	213	394	721	685	397	527	280	329	149	280	65	106	57	78	92	228	98	117	37	48	112	199	100	80	59	62	241	462	236	240	166	164	257	185	126	167
AT1G09470	Carubv10009671	CARHR009430	Thhalv10008143	226	128	337	65	205	105	204	141	326	167	216	160	222	174	154	70	168	149	104	64	117	37	95	49	72	76	90	35	88	50	75	45	65	70	58	39	146	193	229	163	183	151	141	130	121	147
AT1G09490	Carubv10009753	CARHR222090	Thhalv10008138	651	583	946	743	854	670	530	433	770	758	558	528	704	518	913	873	656	489	44	2646	307	406	99	803	164	2608	135	711	87	297	129	1953	284	770	110	463	2	7	2	1	1	3	0	5	1	7
AT1G09500	Carubv10009736	CARHR009470	Thhalv10019826	48	122	283	593	234	196	69	54	283	569	64	142	66	64	473	974	176	133	343	163	132	67	637	295	195	164	68	112	576	251	266	297	196	152	1355	443	832	2131	1984	3744	3967	5292	1273	1784	1964	4622
AT1G09520	Carubv10012528	CARHR009490	Thhalv10008580	560	644	763	537	813	479	536	464	614	492	369	490	586	575	502	521	566	516	329	155	123	193	333	252	178	139	202	158	252	214	303	146	223	219	316	252	851	896	566	488	1048	759	705	382	475	295
AT1G09530	Carubv10008815	CARHR009500	Thhalv10007343	1410	1246	1695	1472	1707	1482	1104	854	1238	1353	704	1209	1262	1145	1269	1605	1673	1206	1797	1093	338	266	969	645	1376	647	335	341	882	591	1260	607	269	283	929	743	3929	3837	1324	952	4437	2386	3281	1729	1060	902
AT1G09540	Carubv10009497	CARHR009510	Thhalv10008000	24	16	39	19	50	16	40	24	15	30	24	19	24	7	20	15	49	16	18	26	41	25	19	30	27	33	11	10	11	14	15	5	14	14	26	13	88	57	45	104	161	152	83	28	91	56
AT1G09560	Carubv10010233	CARHR009530	Thhalv10008725	1919	5666	3665	11397	5089	13090	2772	4331	2880	8195	3589	8652	2141	4080	1803	9690	4139	8847	2751	12543	3833	10103	5334	14993	5608	13071	5267	14051	4066	13191	3955	10699	4375	10578	3467	8916	5355	21091	6754	15077	15379	33374	5474	14375	8304	11183
AT1G09570	Carubv10008141	CARHR009540	Thhalv10006625	2800	3875	3056	3204	2094	1698	2418	1812	2015	1980	979	1826	3149	3884	3464	5080	2882	1434	4170	1738	2321	5729	3080	2264	3388	1460	3809	4052	2243	2033	3928	1852	4981	3998	2851	3254	6925	8600	7406	6303	5729	7082	5713	4696	5267	4954
AT1G09575	Carubv10009897	CARHR009550	Thhalv10008337	143	405	125	153	86	58	134	249	135	123	97	99	167	391	114	119	75	57	124	155	189	124	81	83	128	137	128	144	102	63	149	151	125	132	104	82	221	829	207	166	155	259	192	767	132	182
AT1G09580	Carubv10010159	CARHR009560	Thhalv10008686	326	247	498	209	365	190	252	255	392	209	141	192	308	323	233	203	256	160	362	372	508	234	219	203	407	435	371	295	332	168	301	271	361	314	284	246	518	542	480	371	414	283	433	323	408	314
AT1G09600	Carubv10008488	CARHR009580	Thhalv10006949	34	30	56	6	46	18	73	28	29	10	47	49	47	32	19	8	28	19	34	21	4	15	64	25	28	35	12	7	27	25	20	31	7	5	43	43	69	213	89	90	89	154	79	180	60	76
AT1G09610	Carubv10011736	CARHR009590	Thhalv10009538	4	14	23	15	19	29	10	15	11	1	0	10	2	17	6	12	24	7	14	28	63	12	46	37	32	15	14	9	20	18	34	28	30	10	54	16	7	15	17	9	19	20	15	5	13	6
AT1G09620	Carubv10008148	CARHR040170	Thhalv10006633	3906	4918	7164	4355	5003	3553	3054	2430	4755	3043	2724	3801	4120	5216	6375	6204	6829	3196	5168	2437	2274	4468	6548	3345	3754	2592	4014	3721	4174	2662	3905	2742	4752	3512	4745	3268	3713	3040	4540	2803	4537	3213	2716	1830	2941	1990
AT1G09630	Carubv10010267	CARHR009600	Thhalv10008742	587	1788	874	1025	590	945	505	1278	729	948	375	907	707	1456	517	903	566	629	844	1075	1329	859	621	741	801	1154	928	1162	715	661	863	847	935	965	642	639	872	1564	673	763	981	1420	714	995	617	717
AT1G09645	Carubv10010723	CARHR009620	Thhalv10009166	606	1284	900	1197	708	985	780	1111	892	1218	471	946	794	989	712	910	656	785	965	2928	1128	1167	827	1858	1533	3347	1209	1717	1140	1167	1201	2839	1127	1601	1015	1536	420	783	585	605	481	830	523	520	542	727
AT1G09650	Carubv10002539	CARHR024930	Thhalv10009873	22	11	21	15	27	25	28	25	29	15	26	10	30	28	10	8	11	16	18	127	13	50	21	48	27	73	40	59	30	31	21	96	31	53	20	33	0	0	0	0	0	0	0	0	0	0
AT1G09660	Carubv10009882	CARHR009630	Thhalv10008323	1635	616	1759	711	2261	1105	1597	806	1578	1133	1849	1239	1649	840	1123	737	1541	1348	812	341	557	610	1105	765	958	554	976	812	1347	858	822	431	1003	883	962	874	1516	995	1191	532	1292	614	1029	604	949	481
AT1G09680	Carubv10008618	CARHR009650	Thhalv10007116	50	69	156	91	62	44	34	32	100	51	61	53	36	63	149	111	73	47	176	500	144	172	168	135	252	757	210	216	119	82	155	574	210	233	97	124	154	109	211	114	169	113	101	74	153	82
AT1G09690	Carubv10010498	CARHR009570	Thhalv10008951	14694	10158	20688	10070	17766	9385	15350	11784	18148	11372	11586	11113	15058	10372	9962	8958	11222	10302	7058	5402	8548	4161	6754	5348	11623	7652	7109	6014	9934	3964	6217	6225	4969	5452	5749	5611	11558	12450	11262	7767	7899	3980	12005	7299	8999	6578
AT1G09700	Carubv10009604	CARHR009670	Thhalv10009442	302	258	396	202	337	280	310	243	339	341	234	301	329	270	327	340	415	250	544	380	542	431	517	459	566	473	489	500	569	313	630	452	735	620	491	434	700	641	682	521	674	601	567	340	569	566
AT1G09720	Carubv10011130	CARHR009690	Thhalv10009464	0	0	2	0	0	0	0	0	0	0	0	0	0	0	0	0	0	0	0	0	0	0	0	0	1	0	0	0	0	0	0	0	0	0	0	0	0	0	2	0	0	1	0	2	0	0
AT1G09730	Carubv10008238	CARHR009700	Thhalv10006645	970	1719	1342	1447	1053	998	788	858	993	989	452	1076	984	1429	1296	1505	1212	773	1340	1314	886	1272	1347	1304	1145	1304	1088	1350	836	907	1027	1167	1253	1166	1140	995	1213	1630	1372	1358	1611	2497	944	965	1050	1168
AT1G09740	Carubv10010470	CARHR009710	Thhalv10008924	909	1242	1260	1436	1525	1721	1265	855	884	1612	1308	1227	986	770	825	1348	1154	1209	705	1017	1232	1145	896	1394	1158	1036	934	1532	967	963	928	855	920	1163	1020	1203	608	811	686	681	778	742	521	443	701	739
AT1G09750	Carubv10008880	CARHR009730	Thhalv10007613	3035	1551	4142	1177	2129	1088	3467	1857	4007	1815	1719	1452	2869	2213	2592	2009	1038	1123	2215	738	837	1698	1275	649	1089	484	1921	1606	865	437	1594	571	2382	1546	1766	629	1031	584	3132	1088	814	281	1005	241	1810	758
AT1G09760	Carubv10012046	CARHR009720	Thhalv10008494	1862	1222	2176	1521	2427	1457	2029	1639	1927	1924	1818	1717	1949	1263	1422	1510	1855	1622	907	409	1411	695	1216	789	703	621	915	661	1129	692	870	431	769	703	1026	886	1616	1666	1521	1217	1588	1309	1336	991	1197	1081
AT1G09770	Carubv10008427	CARHR009740	Thhalv10006800	3803	4467	5415	4725	3778	2938	3072	3338	4178	3780	2003	3338	3714	4304	4675	4961	4026	2267	4754	3090	2076	4416	4631	3665	5304	3655	4476	4452	3789	2631	4123	3516	5570	5025	3812	3589	4181	5175	4651	3703	5905	6267	3249	3023	3261	3485
AT1G09780	Carubv10008742	CARHR009750	Thhalv10007256	3608	5061	10310	7154	7367	5877	3938	3545	7812	5323	4440	6387	4449	4862	6899	7420	7365	4830	4519	2673	5934	9396	7006	6483	5210	3785	8836	8672	7539	7660	5533	3301	9951	9170	5671	6767	5403	5084	8284	6492	4971	5554	4404	3061	7351	4632
AT1G09790	Carubv10011331	CARHR009760	Thhalv10007643	0	1	0	0	2	4	0	1	0	0	16	0	0	3	0	0	0	0	0	0	0	0	0	0	0	0	0	0	0	0	0	0	0	0	0	0	0	0	0	0	0	0	1	0	0	0
AT1G09795	Carubv10011733	CARHR009780	Thhalv10007791	1240	1213	3430	1984	1407	751	1117	1100	3143	1884	962	844	1398	1320	2999	2130	1329	775	1308	656	1676	1752	1303	712	909	939	2456	1747	1137	554	878	605	2715	1776	1138	895	1279	1314	2262	1015	1038	486	1264	752	1586	1027
AT1G09800	Carubv10009493	CARHR009790	Thhalv10007981	203	94	259	138	268	150	191	141	248	143	196	142	203	114	155	117	223	142	390	259	384	260	413	434	495	321	389	328	541	279	408	333	407	380	440	339	326	327	290	195	414	311	273	191	213	212
AT1G09810	Carubv10011018	CARHR009800	Thhalv10009895	450	414	798	661	955	677	529	366	599	621	489	547	528	367	544	612	777	543	380	217	313	305	1136	712	493	315	287	330	764	426	399	355	409	423	585	495	573	366	643	608	753	782	462	232	572	489
AT1G09812	Carubv10010622	CARHR009810	Thhalv10009091	25	18	41	16	73	43	17	16	33	16	43	69	25	26	13	15	37	58	79	40	32	33	123	151	51	36	41	22	112	39	56	25	43	36	99	111	66	37	113	81	85	62	40	14	46	63
AT1G09815	Carubv10010654	CARHR009820	Thhalv10009118	585	1082	945	725	1062	549	713	847	872	851	392	743	683	841	548	629	624	738	979	799	675	558	663	713	945	980	963	856	720	426	918	648	982	817	644	775	346	405	359	182	357	329	324	204	212	193
AT1G09820	Carubv10010987	CARHR009830	Thhalv10009487	165	163	216	150	225	210	76	74	171	100	126	207	213	150	186	133	240	117	82	61	109	93	102	71	78	91	62	51	73	50	67	47	121	81	82	91	375	377	315	378	464	451	312	209	311	282
AT1G09830	Carubv10008837	CARHR009850	Thhalv10007333	928	1002	1348	742	1408	975	741	496	991	644	670	1046	1024	1004	921	1136	1751	1121	649	1584	472	394	726	444	748	1703	622	411	724	381	585	1409	609	568	579	460	1834	1324	2319	1147	1649	1142	1401	794	1851	934
AT1G09840	Carubv10009250	CARHR009860	Thhalv10007729	1117	1128	1432	1055	1404	1254	955	893	1165	1123	899	1350	1264	1059	1114	986	1403	928	1246	1049	1109	1484	1519	1658	1244	917	1605	1639	1401	1323	1391	970	1787	1635	1360	1379	2160	2523	1947	1962	3097	3231	1783	1420	1552	1598
AT1G09850	Carubv10009056	CARHR009870	Thhalv10007640	475	536	1457	991	625	300	572	461	1149	837	357	443	467	476	974	1103	501	300	258	160	683	703	330	280	236	199	810	700	330	255	286	174	749	577	371	323	757	751	668	496	489	296	817	468	568	446
AT1G09860	Carubv10011209	CARHR009890	Thhalv10009498	9	2	0	0	0	0	0	0	1	0	0	1	3	9	0	1	0	1	1	0	2	0	1	0	0	1	0	1	0	0	1	6	0	0	2	0	2	10	3	2	5	4	2	5	4	2
AT1G09870	Carubv10008976	CARHR009900	Thhalv10007485	724	812	1126	1112	945	933	900	692	986	1021	709	1052	854	961	922	1233	1022	773	604	590	765	842	934	769	607	660	824	811	677	635	665	570	799	692	763	740	1414	1839	1531	1866	2224	2736	1093	1170	1250	1418
AT1G09880	Carubv10008518	CARHR009920	Thhalv10007038	5	13	21	8	12	6	12	5	15	3	11	5	0	20	8	12	11	16	22	11	25	13	15	11	4	9	12	5	22	5	19	8	16	9	21	8	14	18	17	21	13	12	6	10	10	24
AT1G09890	Carubv10010965	CARHR009930	Thhalv10007093	19	47	54	34	50	24	14	20	27	17	30	21	29	63	34	44	55	25	14	13	27	25	34	22	14	23	18	5	8	8	27	12	22	14	29	8	33	150	89	85	58	42	69	47	42	74
AT1G09910	Carubv10008508	CARHR009950	Thhalv10007058	322	369	478	482	309	322	262	267	354	350	210	307	382	401	478	539	273	193	441	313	257	543	382	445	358	356	500	547	281	326	398	288	682	540	389	375	81	130	204	140	228	163	85	71	140	109
AT1G09920	Carubv10010346	CARHR009970	Thhalv10008829	750	977	920	1138	1097	1476	905	1194	969	2038	1233	1189	899	710	820	984	813	1000	1007	1370	992	868	1125	1999	1662	2056	1067	1636	1183	1139	968	1236	1072	1367	1168	1404	453	797	577	727	882	1409	513	486	556	823
AT1G09930	Carubv10011782	CARHR009980	Thhalv10009349	5	32	3	4	22	111	0	10	1	9	1	21	1	20	1	3	6	23	162	2702	40	145	119	595	266	6270	82	190	141	281	88	1890	74	167	117	215	20	97	26	16	44	42	17	35	14	23
AT1G09932	Carubv10011217	CARHR010000	Thhalv10008516	118	3024	155	826	329	1880	125	1394	112	593	133	1208	111	2507	93	769	259	927	126	1235	129	162	92	422	188	2596	109	163	72	144	57	1366	121	187	103	227	99	344	149	192	174	321	158	170	56	170
AT1G09935	Carubv10011120	CARHR010050	Thhalv10009613	0	7	0	2	3	5	0	4	0	3	0	6	0	0	0	1	1	1	0	14	1	1	0	2	0	82	0	0	0	0	0	19	0	0	0	2	0	4	1	2	2	5	1	1	0	0
AT1G09940	Carubv10008813	CARHR010060	Thhalv10007359	460	3354	1459	2839	588	1283	564	2181	1442	1962	447	1165	528	4525	1567	2642	582	920	820	9634	977	1486	756	1436	829	10088	1123	1629	630	1079	852	10390	1467	1851	711	1198	837	8821	2224	2381	2130	5270	761	8041	1923	2282
AT1G09950	Carubv10010176	CARHR010070	Thhalv10008665	7	11	11	16	20	2	0	3	7	16	6	11	20	19	18	10	16	9	4	42	18	7	14	10	6	37	13	35	7	4	3	16	25	16	9	7	11	34	6	25	26	36	1	29	14	17
AT1G09960	Carubv10008890	CARHR010080	Thhalv10007390	166	229	317	248	177	162	132	148	245	196	118	170	152	219	237	222	172	92	228	380	262	219	584	443	254	437	253	257	447	267	251	410	283	262	468	312	258	385	334	288	635	505	205	192	209	187
AT1G09970	Carubv10008210	CARHR010090	Thhalv10006696	5679	32467	15420	20838	8378	15225	4138	14613	10569	12740	3930	11764	5244	25733	13739	17953	8934	9951	5898	19486	6719	13856	7497	12624	7681	16208	8243	11966	7285	11303	7582	17110	8072	10649	6525	12200	3889	13103	5067	7068	10092	16331	3321	8679	4294	5236
AT1G09980	Carubv10011744	CARHR010100	Thhalv10006833	924	1642	1333	1158	1223	1098	601	877	949	699	817	1112	892	1483	1112	1151	1320	712	1238	974	461	899	1110	806	814	1037	746	777	886	694	963	978	852	756	1038	775	1235	1899	1061	836	1613	1754	817	1131	778	605
AT1G10010	Carubv10012383	CARHR010110	Thhalv10007516	5	0	0	1	0	0	0	0	0	0	0	0	0	0	1	0	0	0	0	0	0	0	0	1	0	0	0	0	0	4	0	0	1	0	0	0	0	17	3	1	13	27	0	5	0	1
AT1G10020	Carubv10009083	CARHR010130	Thhalv10007581	1053	709	1235	882	739	503	693	492	897	843	473	510	1177	680	930	803	751	419	2391	738	827	1342	1438	1085	1665	541	1610	1445	1012	773	1665	623	1378	923	1548	1064	1171	1618	1687	1307	620	461	1079	632	1393	985
AT1G10030	Carubv10010632	CARHR010140	Thhalv10009099	622	358	724	349	741	378	668	458	694	470	590	430	635	400	373	309	426	307	623	313	729	347	334	324	704	373	541	533	371	239	506	349	567	558	439	358	967	851	939	521	369	216	851	419	683	631
AT1G10040	Carubv10009269	CARHR010150	Thhalv10007805	56	520	156	193	210	245	63	587	128	146	109	262	98	435	94	103	153	161	37	355	99	106	64	216	106	359	63	110	82	102	70	228	67	96	60	104	531	1155	401	272	566	947	389	712	302	176
AT1G10050	Carubv10008147	CARHR010160	Thhalv10006640	393	1625	583	916	492	785	285	759	399	395	188	672	303	1289	442	690	533	533	316	700	187	513	363	425	393	576	324	554	237	280	301	572	400	445	280	340	572	2764	980	964	1178	3208	565	1971	760	780
AT1G10060	Carubv10010964	CARHR010170	Thhalv10007903	633	705	1104	1157	752	452	460	472	893	1292	360	483	664	531	953	827	393	320	503	783	939	758	1294	987	835	694	1925	1341	2224	957	1051	542	930	897	914	933	559	1039	885	588	363	325	579	587	562	676
AT1G10070	Carubv10009404	CARHR010180	Thhalv10007897	795	1432	3659	15302	415	542	853	1453	3745	21476	281	725	749	922	6864	18168	333	363	370	573	1577	3872	223	560	485	568	2607	3908	392	243	532	569	3228	3159	154	348	805	2760	2896	3126	431	1328	1062	1177	1925	3604
AT1G10095	Carubv10009225	CARHR010210	Thhalv10000880	158	134	241	237	155	117	147	147	215	182	147	143	166	141	202	197	134	89	611	410	383	508	420	414	700	400	698	640	441	323	617	420	875	767	500	434	362	415	404	379	533	653	291	228	333	407
AT1G10110	Carubv10018394	CARHR009060	Thhalv10015724	20	12	34	18	26	14	5	13	20	14	25	21	19	18	19	12	34	13	0	0	0	0	0	0	0	0	0	0	0	0	0	0	0	0	0	0	103	95	82	39	109	73	65	52	66	54
AT1G10120	Carubv10009514	CARHR010220	Thhalv10008002	1012	543	1125	539	1079	738	1123	639	875	816	892	855	1113	661	739	466	856	589	594	251	375	463	692	540	537	262	644	565	556	363	573	217	572	509	546	425	1008	964	1016	607	817	598	902	470	1012	607
AT1G10130	Carubv10008220	CARHR010230	Thhalv10006682	1350	1411	1944	1479	1492	1528	1379	1075	1375	1428	1034	1487	1467	1475	1803	1754	1642	995	1307	793	773	1446	1447	1056	1147	956	1279	1336	1190	1013	1245	846	1286	1226	1348	974	1323	1189	1626	1664	1369	1278	920	796	1318	1156
AT1G10150	Carubv10009272	CARHR010250	Thhalv10007757	554	1295	786	954	380	499	410	604	579	504	245	508	660	1058	744	846	489	277	725	685	759	781	610	371	312	635	680	639	225	204	512	807	712	546	566	425	961	2087	1105	1310	584	653	972	1298	909	1295
AT1G10155	Carubv10010397	CARHR010260	Thhalv10008847	14	33	19	21	100	105	13	24	14	11	61	69	26	25	12	7	86	53	201	233	25	13	392	425	111	108	12	9	170	126	182	171	8	5	275	113	206	527	122	117	233	196	197	209	73	93
AT1G10170	Carubv10008145	CARHR010270	Thhalv10006708	1209	2465	3598	3285	2360	1697	897	1215	2094	1511	934	1777	1138	3147	3932	3628	3127	1551	775	378	269	766	538	352	467	316	559	484	312	299	521	336	788	600	488	424	1189	3034	3228	1905	2146	4258	1123	1790	2149	1485
AT1G10180	Carubv10011742	CARHR010280	Thhalv10006875	624	577	769	517	682	513	464	348	604	291	448	623	646	616	694	577	739	454	788	407	451	621	878	568	539	402	479	525	599	537	626	361	646	589	678	569	1152	940	1180	776	1123	866	878	492	809	634
AT1G10200	Carubv10010373	CARHR010300	Thhalv10008856	1302	961	3438	2160	1012	1099	1407	922	3095	2309	710	1196	1450	1098	2639	2342	1128	926	3091	1696	3346	2116	1596	1348	2389	1582	2880	2686	1656	985	2477	1478	2923	2399	1848	1409	1394	1410	2503	1720	1137	1072	1592	864	2093	1567
AT1G10240	Carubv10012599	CARHR010360	Thhalv10006984	345	283	355	220	263	193	271	178	254	191	201	250	377	267	257	297	388	229	439	260	124	352	281	236	336	232	247	298	305	250	372	241	354	261	401	307	611	564	538	415	417	318	462	275	413	367
AT1G10270	Carubv10012602	CARHR010370	Thhalv10006738	387	440	867	503	1108	671	311	280	646	316	461	726	395	502	578	573	1098	640	607	411	466	889	1661	824	583	459	772	691	823	698	723	376	903	694	824	792	1100	787	1103	478	1723	1428	642	402	782	284
AT1G10280	Carubv10012092	CARHR010380	Thhalv10007760	78	152	131	128	119	169	97	73	86	92	109	137	116	153	113	107	191	130	121	83	32	50	125	82	104	78	47	43	108	125	75	59	55	40	147	131	207	404	138	143	326	653	176	257	105	125
AT1G10290	Carubv10008252	CARHR010390	Thhalv10006739	1817	4409	3205	3157	2281	2209	1613	2279	2382	2109	1550	2274	2062	3877	2638	3452	2855	1775	2133	3134	1275	2176	2272	1828	1887	3170	1693	1755	1825	1570	1790	2529	1774	1491	2033	1817	2681	4453	3379	3405	3957	5162	1956	2947	2601	1962
AT1G10310	Carubv10011121	CARHR010440	Thhalv10008625	685	464	739	626	694	541	846	612	693	821	628	627	571	436	459	654	476	562	417	252	289	317	430	376	364	258	385	377	418	270	367	253	376	349	385	345	646	712	801	497	537	414	687	448	598	480
AT1G10320	Carubv10012360	CARHR010450	Thhalv10009354	676	479	800	712	985	765	541	451	623	814	533	727	732	454	603	532	767	400	676	518	195	566	873	1055	1070	743	597	722	833	617	769	593	689	772	692	772	1257	1117	840	702	1093	1244	793	684	705	700
AT1G10330	Carubv10011208	CARHR010470	Thhalv10009465	85	78	68	42	35	66	56	69	55	37	27	58	77	84	85	45	68	37	153	44	66	79	152	51	26	40	38	25	46	36	68	45	57	43	116	53	206	144	204	210	147	171	216	82	165	186
AT1G10350	Carubv10009603	CARHR010480	Thhalv10008066	290	365	472	419	418	328	323	292	412	356	300	349	314	367	334	452	358	255	736	353	589	537	541	478	485	387	530	521	411	401	488	292	553	548	549	475	165	191	369	361	184	170	190	98	271	349
AT1G10360	Carubv10010208	CARHR010490	Thhalv10009674	743	409	733	354	797	524	792	429	684	491	509	480	762	459	602	472	492	466	901	838	563	939	1040	1095	687	750	953	1046	869	880	718	814	1173	1020	1002	971	475	627	668	477	590	534	469	323	408	441
AT1G10370	Carubv10010042	CARHR010500	Thhalv10008682	2422	4731	1836	2042	8569	7074	2589	2718	967	936	5320	5187	2732	3635	409	1253	8896	5482	6095	3295	989	407	14794	8597	4069	2596	812	693	10832	6642	4494	2559	582	428	12101	6817	468	474	1563	709	1462	1553	499	285	1213	538
AT1G10380	Carubv10009641	CARHR010510	Thhalv10008265	399	402	373	222	387	411	373	229	210	137	214	320	248	322	205	262	401	364	107	55	33	53	71	61	52	40	49	74	33	51	61	41	50	31	82	32	96	156	91	90	101	93	64	37	53	50
AT1G10385	Carubv10012362	CARHR010520	Thhalv10009913	0	0	1	0	3	5	2	0	4	0	6	0	0	2	3	0	13	1	6	0	2	4	6	2	9	7	0	1	5	0	2	2	6	5	11	1	5	13	4	2	9	3	4	7	5	5
AT1G10390	Carubv10008140	CARHR010530	Thhalv10006652	2877	3312	4060	3528	3905	3083	2916	2786	3161	4060	2839	3184	3176	3315	3350	3759	3763	2717	3363	2855	1521	3682	3409	3544	3645	3240	2795	3363	2839	2451	2934	2612	3309	3475	3149	3198	2665	3561	3266	3230	3705	5142	1931	2190	2529	2724
AT1G10410	Carubv10011985	CARHR010550	Thhalv10007496	668	1945	1877	3428	1645	3332	677	1155	1342	2066	858	2469	948	1552	1398	2836	1409	1847	462	1642	751	1065	934	3114	814	1616	809	1569	629	1952	591	1269	934	1393	626	1573	597	2267	1001	2416	2439	5473	625	1949	1148	1484
AT1G10417	Carubv10009270	CARHR010560	Thhalv10007877	32	367	95	116	56	97	43	261	61	145	36	113	39	231	36	52	27	83	35	64	49	22	51	27	35	87	72	28	51	17	30	55	37	48	36	26	125	102	69	58	47	39	91	51	50	50
AT1G10430	Carubv10009843	CARHR010580	Thhalv10008290	744	997	1183	984	1145	897	774	821	939	1112	642	881	875	798	914	846	903	704	812	525	678	670	891	1132	929	697	753	887	885	944	846	547	780	834	877	1049	1103	2119	1367	1348	1543	2288	983	1482	932	1364
AT1G10450	Carubv10008167	CARHR010590	Thhalv10006620	988	1311	1788	1569	1286	1139	868	799	1398	1282	747	1104	1284	1337	1820	1766	1729	686	934	589	663	1299	1495	1101	947	787	1042	1229	865	632	897	698	1332	1223	860	882	1638	1924	1429	1322	2902	4770	942	1134	1160	785
AT1G10470	Carubv10010030	CARHR010610	Thhalv10008575	1468	1936	1898	1031	3438	1996	1979	1292	1623	863	1847	1758	2012	1518	1664	1389	2558	1157	2242	981	2115	1393	3054	2488	2512	1231	1336	1478	3111	2155	2258	1161	1325	1714	2906	2298	1194	1001	939	1011	3376	3318	582	541	741	1232
AT1G10480	Carubv10012103	CARHR010620	Thhalv10008773	122	451	134	96	113	163	99	118	79	44	89	113	108	251	50	58	129	73	101	267	449	174	148	190	171	331	109	112	95	118	131	303	123	135	122	137	287	908	161	105	492	591	173	409	83	95
AT1G10490	Carubv10012139	CARHR010630	Thhalv10006661	975	918	2121	1030	2094	1366	664	660	1497	943	1305	1388	1125	1079	1588	1198	2457	913	802	416	716	922	2050	1039	1045	740	936	841	1354	733	904	545	986	885	1015	704	1937	1931	1934	1227	2437	1680	1139	1245	1559	911
AT1G10500	Carubv10010414	CARHR010640	Thhalv10008651	1562	1997	1984	2351	2090	2673	1694	1794	1843	2552	1531	2135	2003	1705	1947	2403	2022	1767	2521	2100	2784	2433	2115	2463	2434	2334	2181	3048	2119	2121	2528	1990	2490	2895	2546	2234	655	840	1364	1394	935	1125	832	513	1175	1740
AT1G10520	Carubv10012462	CARHR010660	Thhalv10009477	97	65	114	86	119	47	86	80	121	92	88	105	110	68	85	82	103	64	193	68	73	103	166	135	225	112	110	153	126	104	211	83	148	170	170	142	39	28	36	27	55	50	22	17	28	15
AT1G10530	Carubv10010489	CARHR010680	Thhalv10009594	53	22	68	31	84	26	24	16	38	65	38	23	43	15	31	16	35	26	6	0	13	5	11	1	5	2	1	8	4	5	6	0	3	4	2	2	8	5	2	3	5	2	5	2	0	2
AT1G10540	Carubv10011003	CARHR010700	Thhalv10007311	27	11	17	19	60	22	8	10	35	32	30	11	17	20	22	5	11	18	2	4	0	5	7	4	6	2	3	4	4	2	2	2	2	0	2	5	9	10	12	14	28	25	7	9	9	5
AT1G10550	Carubv10009787	CARHR010710	Thhalv10008234	63	38	459	41	90	62	76	61	208	27	82	79	349	51	187	48	158	85	568	84	502	408	1331	744	709	104	819	440	1693	763	726	102	655	344	877	861	1108	495	1695	740	1126	169	2778	441	4126	342
AT1G10570	Carubv10011329	CARHR010730	Thhalv10007260	616	540	957	749	689	674	406	355	870	751	340	701	617	492	753	758	642	385	557	309	236	460	385	374	575	317	489	542	290	337	602	294	685	564	452	342	288	280	257	245	295	324	213	111	226	247
AT1G10580	Carubv10008709	CARHR010740	Thhalv10007215	1193	1495	2129	2135	2191	1828	1254	1083	1588	1556	1367	1781	1306	1359	1541	1553	1991	1323	1358	915	1062	1602	1873	1729	1793	1321	1522	1760	1733	1261	1380	954	1541	1581	1654	1590	1511	1795	1940	1530	2414	2940	1250	1086	1572	1231
AT1G10590	Carubv10010598	CARHR010770	Thhalv10008819	3261	3429	4755	4036	4477	3450	3159	3480	3966	4472	2928	3740	3800	3276	3021	3219	3497	3358	2827	3573	5222	3307	2685	3138	3990	4089	4070	4081	3782	2708	3009	3228	3512	3622	2712	3132	3628	4746	4789	4579	4787	4751	3218	3017	4280	4877
AT1G10610	Carubv10012182	CARHR010780	Thhalv10007639	370	206	216	232	262	275	325	237	213	199	193	249	366	205	263	202	243	175	103	38	10	40	62	73	89	33	41	43	73	47	94	44	53	43	78	70	830	683	1127	969	726	964	759	310	713	1094
AT1G10620	Carubv10012045	CARHR010790	Thhalv10006940	0	0	0	0	0	1	0	0	0	0	0	0	0	0	0	0	1	0	0	0	0	0	0	0	0	1	0	0	0	0	0	0	0	0	0	0	1	0	0	0	7	7	1	0	0	0
AT1G10640	Carubv10008765	CARHR010810	Thhalv10007255	198	58	104	9	556	171	116	68	116	22	403	318	166	92	43	28	272	181	403	64	35	21	587	120	138	33	66	50	338	82	209	48	66	29	840	187	206	67	81	40	880	248	179	35	65	37
AT1G10650	Carubv10009658	CARHR010820	Thhalv10008132	394	940	619	524	1678	1919	375	475	513	382	703	1293	507	907	456	466	1476	1000	582	791	641	496	1443	1391	594	835	478	608	859	776	527	751	587	484	1164	1066	932	1509	698	617	2473	2665	793	1183	565	689
AT1G10657	Carubv10010722	CARHR010830	Thhalv10009171	202	132	231	119	397	545	247	129	232	141	578	565	152	135	117	88	257	346	209	118	284	191	306	297	112	93	209	180	225	141	153	91	155	147	405	526	152	142	203	111	339	204	143	91	97	79
AT1G10660	Carubv10009779	CARHR010840	Thhalv10008229	820	868	1017	1033	1114	1280	784	616	901	741	616	1033	782	872	1042	1152	1096	778	3137	1470	4835	2807	3711	2982	2713	1282	3381	3061	3196	2105	2884	1269	4720	3374	3727	2973	563	530	1090	1195	597	638	482	335	920	1299
AT1G10680	Carubv10011664	CARHR010860	Thhalv10009914	3	10	5	0	0	0	0	0	6	3	0	1	2	2	3	8	6	1	1	0	1	2	1	4	0	7	5	9	7	2	0	0	0	1	0	3	0	2	2	0	0	0	0	1	1	0
AT1G10690	Carubv10010693	CARHR010870	Thhalv10009472	98	111	108	132	126	142	93	94	102	105	136	139	65	120	60	97	54	115	22	18	17	19	26	32	7	18	17	32	25	35	13	13	25	35	22	30	23	154	37	101	60	129	24	91	28	88
AT1G10700	Carubv10009207	CARHR010880	Thhalv10007773	590	2386	929	2336	778	2235	642	1446	880	1672	540	1220	591	1398	847	1855	643	1035	588	3404	807	1186	530	3042	502	3575	783	1693	425	2060	556	2553	807	1117	453	1435	559	984	883	956	561	1337	435	804	721	840
AT1G10710	Carubv10009567	CARHR010890	Thhalv10007956	11	2	13	4	6	9	2	2	12	0	0	0	10	1	5	5	4	3	29	29	74	15	17	17	15	18	38	30	9	13	12	16	52	31	16	13	11	10	11	7	9	10	3	8	6	4
AT1G10720	Carubv10009128	CARHR010910	Thhalv10007670	871	1599	945	1062	926	998	1100	1426	824	1167	741	856	927	1383	843	868	722	712	1141	1358	637	642	971	1093	1450	1540	865	838	997	691	1058	1163	850	782	928	912	401	780	333	252	484	652	344	516	244	243
AT1G10740	Carubv10009032	CARHR010930	Thhalv10007563	1141	1450	955	725	1398	1442	941	980	793	605	943	1477	1387	1545	864	856	1402	1115	1922	1133	328	303	1536	1190	1377	1155	366	307	952	734	1290	1267	314	198	2343	1159	793	1023	570	369	750	518	832	593	369	408
AT1G10745	Carubv10012645	CARHR010950	Thhalv10009817	0	0	0	0	0	0	0	0	0	0	0	0	0	0	0	0	1	0	0	0	0	0	0	0	1	0	0	0	0	0	0	0	0	0	0	0	0	0	0	0	0	0	0	0	0	0
AT1G10747	Carubv10010942	CARHR010960	Thhalv10010877	0	0	0	0	0	0	0	0	0	0	0	0	0	0	0	1	0	0	0	0	0	0	0	0	0	0	0	0	0	0	0	0	0	0	0	0	0	0	0	0	0	0	0	0	0	0
AT1G10750	Carubv10009043	CARHR010970	Thhalv10007533	120	115	196	73	133	97	69	58	166	66	112	99	113	66	85	61	119	75	112	99	59	110	137	93	122	87	89	56	96	54	85	62	147	113	109	67	74	67	72	42	75	42	53	55	36	44
AT1G10760	Carubv10008131	CARHR010980	Thhalv10006565	935	1463	14929	6120	1689	1271	1074	785	9692	4014	933	1323	1093	1698	16377	10829	2372	1095	737	328	4175	8587	2195	851	232	350	5496	3365	925	798	798	319	6291	3187	1613	1069	1455	1495	23692	7752	3106	2203	1253	981	16714	4714
AT1G10770	Carubv10010490	CARHR010990	Thhalv10008932	0	1	11	20	0	0	0	0	13	2	0	0	0	2	35	9	0	0	0	0	3	3	0	0	1	1	1	3	1	0	1	1	2	5	0	1	0	0	30	10	6	1	1	0	30	23
AT1G10780	Carubv10009265	CARHR011000	Thhalv10007703	236	125	310	83	232	76	143	144	247	159	245	167	219	164	146	79	122	93	173	125	86	90	160	66	130	114	171	109	150	61	129	94	168	123	133	94	221	179	205	91	153	52	130	105	159	85
AT1G10790	Carubv10011389	CARHR011010	Thhalv10009702	6	5	12	10	7	18	0	5	7	0	10	3	2	9	8	2	3	4	3	0	7	2	3	0	5	9	0	3	2	1	2	2	2	10	2	0	0	1	2	0	0	0	0	0	0	0
AT1G10800	Carubv10010900	CARHR011020	Thhalv10009458	6	6	11	3	3	7	3	0	5	0	11	5	3	9	2	4	10	5	2	7	3	3	7	2	6	0	6	0	4	0	5	4	3	0	11	3	5	12	13	11	14	6	9	8	3	2
AT1G10820	Carubv10010034	CARHR011040	Thhalv10008502	860	429	915	603	694	681	703	494	794	602	552	671	822	431	686	645	718	469	897	435	923	1433	694	682	692	386	1345	1187	564	422	931	354	1702	1263	638	550	574	418	572	453	457	413	479	198	410	483
AT1G10830	Carubv10009509	CARHR011050	Thhalv10007996	762	716	1079	787	709	532	649	660	968	833	533	554	858	651	949	1010	697	457	1158	598	615	901	858	601	839	635	931	910	910	547	1037	651	1226	952	1007	767	783	689	1358	791	935	1274	650	542	1073	720
AT1G10840	Carubv10012627	CARHR011060	Thhalv10008134	3563	3584	5293	3179	5153	2961	3477	3145	4320	3371	3272	3489	3683	3260	3684	3342	4540	2828	3653	2871	4540	2821	4315	3197	4057	3683	3550	3304	4441	2992	3382	2892	3624	2926	3550	2895	3475	3724	4022	2918	3437	2585	2810	2425	3267	2294
AT1G10850	Carubv10011198	CARHR011070	Thhalv10007013	750	425	722	229	1052	669	697	378	649	248	751	792	806	582	438	209	863	643	585	256	174	293	588	400	357	243	355	275	458	385	490	219	446	326	487	394	757	608	541	240	695	317	558	312	361	213
AT1G10870	Carubv10011084	CARHR011090	Thhalv10006873	823	833	1023	647	976	916	623	441	763	574	450	1003	739	913	677	686	1028	617	1102	616	625	627	972	655	776	516	682	612	716	576	883	529	656	606	928	546	666	700	746	628	726	772	597	412	553	493
AT1G10880	Carubv10012419	CARHR011100	Thhalv10009677	0	0	0	1	0	0	0	0	0	0	0	0	0	0	0	0	0	0	3	2	5	1	3	0	2	6	2	0	4	12	0	2	0	2	5	9	0	0	0	0	1	1	0	0	0	0
AT1G10900	Carubv10008368	CARHR011120	Thhalv10006872	1101	2404	854	1304	1821	2229	852	995	628	730	940	1780	1186	1827	888	1333	2765	1286	1278	523	83	297	3517	2667	743	452	225	311	1825	1664	1180	581	248	282	2413	1822	1405	1841	1143	1281	2857	2842	1003	1020	721	819
AT1G10930	Carubv10012033	CARHR011150	Thhalv10006602	441	513	1100	536	513	302	355	325	917	421	410	502	545	581	838	697	578	224	964	595	301	579	917	496	658	697	692	490	548	402	605	486	573	441	665	448	460	473	629	225	307	141	304	267	411	197
AT1G10940	Carubv10009533	CARHR011160	Thhalv10007985	3080	2687	2500	2629	3097	2916	3308	3360	2287	3981	3530	2952	3135	2272	2111	2287	2642	2134	4812	5052	2280	2021	3806	4980	5716	5246	2381	2993	3661	3071	4359	5040	2802	2705	4623	4546	2871	4326	4123	3277	3124	3698	2683	2363	3091	3441
AT1G10950	Carubv10011995	CARHR011170	Thhalv10007167	3911	4653	6143	4395	4856	4049	3577	3271	4352	3935	3240	4131	4088	4370	4501	4887	4668	3161	4854	3036	3282	3891	4799	3147	3276	3505	3820	3140	3988	3212	4188	3066	3909	2890	4786	3449	3128	2933	4094	3394	2925	1779	2532	1925	3114	2291
AT1G10970	Carubv10009291	CARHR011180	Thhalv10007788	109	108	228	103	136	142	111	88	178	172	77	155	136	100	124	161	127	94	116	49	102	86	106	113	102	58	205	168	110	106	109	59	261	161	106	110	176	296	192	200	128	106	127	117	161	194
AT1G10980	Carubv10008829	CARHR011200	Thhalv10007387	0	5	4	2	8	5	6	2	11	4	6	4	5	8	1	2	2	1	194	74	96	64	152	113	150	76	54	63	111	62	115	81	111	117	124	69	2	2	0	0	1	2	1	2	0	0
AT1G11000	Carubv10008710	CARHR011210	Thhalv10007202	369	727	377	235	285	243	338	539	318	396	219	303	414	724	259	175	207	191	331	427	180	245	228	240	352	421	281	278	216	180	294	402	360	279	220	160	290	405	170	120	125	118	271	201	129	98
AT1G11020	Carubv10009723	CARHR011220	Thhalv10008262	340	523	479	457	293	335	305	364	406	429	141	434	317	432	480	478	293	288	349	341	248	331	274	312	398	374	406	425	301	350	373	335	416	372	298	352	407	600	633	741	777	1032	434	314	500	679
AT1G11040	Carubv10011013	CARHR011230	Thhalv10007652	0	2	0	2	0	0	0	1	1	0	0	1	0	2	1	4	0	0	0	9	1	6	4	7	3	12	0	3	2	4	3	11	6	8	3	4	3	13	5	5	7	6	0	17	2	6
AT1G11050	Carubv10008580	CARHR011240	Thhalv10007041	392	1468	674	933	526	1402	263	523	427	467	271	981	353	1126	468	882	605	652	198	1057	235	410	376	743	262	1177	177	403	367	481	271	979	242	381	308	472	263	1494	307	584	615	1603	285	1300	275	474
AT1G11060	Carubv10008277	CARHR011250	Thhalv10006765	608	733	777	752	853	688	529	507	580	907	647	662	496	641	736	831	731	515	677	510	392	944	832	738	709	576	831	885	700	466	578	525	951	945	683	597	708	964	926	907	1100	1647	539	703	672	715
AT1G11070	Carubv10008313	CARHR011260	Thhalv10009997	36	38	31	14	23	7	36	27	18	15	23	15	65	38	25	26	20	5	14	6	3	6	10	4	5	4	11	11	1	4	5	4	4	12	10	3	0	0	0	0	0	0	0	0	0	0
AT1G11080	Carubv10008980	CARHR011270	Thhalv10007471	431	378	257	110	155	37	526	440	274	293	116	164	299	176	86	67	57	63	242	255	55	83	72	31	180	208	33	29	35	13	76	197	54	39	135	20	82	100	51	52	32	8	50	46	9	31
AT1G11090	Carubv10011807	CARHR011280	Thhalv10010022	171	183	285	160	249	208	209	135	206	164	215	220	282	173	237	210	256	169	380	674	437	419	275	358	333	578	431	462	193	206	399	549	488	419	288	322	269	667	320	379	476	720	310	467	250	280
AT1G11112	Carubv10011297	CARHR011310	Thhalv10009626	46	17	47	20	48	23	16	30	38	19	45	33	26	9	19	10	33	30	16	15	11	13	13	6	16	6	11	22	10	0	18	5	16	18	10	8	17	10	6	6	25	13	29	4	4	11
AT1G11120	Carubv10010513	CARHR011320	Thhalv10008990	84	36	106	21	91	45	63	32	80	25	44	54	74	43	38	41	79	64	59	32	56	41	64	41	74	48	79	57	64	44	69	23	68	110	55	33	59	74	35	25	65	38	50	27	48	51
AT1G11125	Carubv10010002	CARHR011330	Thhalv10008484	25	35	31	11	51	8	19	29	25	12	22	20	41	25	17	20	26	14	32	49	36	23	21	17	28	33	25	15	24	12	20	27	29	30	16	7	33	53	32	28	37	19	16	13	25	19
AT1G11130	Carubv10008374	CARHR011340	Thhalv10006881	379	390	839	192	560	237	208	178	540	194	255	451	458	372	490	265	570	290	388	264	146	181	453	318	323	231	200	149	436	221	367	196	221	193	394	210	524	379	673	371	477	279	360	208	376	244
AT1G11160	Carubv10008176	CARHR011370	Thhalv10006699	92	76	146	49	79	49	56	42	120	29	101	66	88	89	159	54	125	34	42	25	37	100	88	61	40	36	96	67	35	55	41	35	76	82	54	35	149	770	248	355	207	612	112	557	183	309
AT1G11170	Carubv10009178	CARHR011380	Thhalv10007686	52	37	222	192	90	50	81	89	172	140	71	74	71	76	137	183	78	65	8	14	14	26	12	22	8	22	19	31	16	17	9	9	15	18	16	14	327	191	260	790	1003	883	175	123	664	460
AT1G11180	Carubv10009907	CARHR011400	Thhalv10008358	416	433	516	636	241	262	404	477	531	779	143	250	415	355	617	744	206	173	639	486	717	710	439	436	681	535	775	743	494	420	492	425	764	732	565	405	696	1097	1053	1234	1031	1370	641	628	979	1024
AT1G11190	Carubv10009855	CARHR011420	Thhalv10008305	12	60	39	34	37	30	34	27	40	26	19	29	50	50	39	34	62	41	0	21	56	10	31	11	32	17	18	12	13	7	13	18	5	13	27	9	33	72	92	78	61	150	44	39	59	64
AT1G11200	Carubv10009893	CARHR011430	Thhalv10008344	332	1453	678	989	611	928	366	1047	612	947	324	717	426	1138	556	846	441	619	546	5695	1377	875	478	1345	759	6286	869	1317	463	798	561	5104	939	1208	476	956	430	988	663	854	596	1209	390	738	527	733
AT1G11210	Carubv10009737	CARHR011440	Thhalv10008322	11	23	387	298	95	32	15	12	331	246	35	34	20	51	425	443	41	45	0	3	170	102	106	150	5	5	117	62	52	58	11	16	103	79	33	86	38	25	172	168	110	140	7	14	204	96
AT1G11220	Carubv10009857	CARHR011450	Thhalv10009955	59	39	100	32	59	11	32	50	129	40	43	50	56	41	36	28	26	34	100	59	142	38	44	30	71	62	143	38	80	29	50	40	80	57	47	23	62	315	93	234	109	237	55	194	183	232
AT1G11240	Carubv10010339	CARHR011470	Thhalv10008794	1187	883	1636	1030	1765	975	1549	1045	1370	1491	1161	1138	1349	901	1084	978	1188	960	716	548	780	587	943	733	816	716	759	676	787	546	630	616	713	815	646	617	1257	1545	1143	794	1465	1453	1089	940	913	987
AT1G11250	Carubv10011255	CARHR011480	Thhalv10008327	4	4	7	12	10	9	9	3	6	14	13	8	0	6	3	5	4	4	0	0	0	0	0	0	0	0	1	0	0	0	0	0	0	0	0	0	0	0	0	0	0	0	0	0	0	0
AT1G11270	Carubv10009460	CARHR011460	Thhalv10010027	192	120	207	143	89	112	188	152	199	109	82	110	178	160	214	168	107	78	92	32	73	103	91	50	83	64	112	99	65	88	82	68	133	82	65	61	0	0	0	0	0	0	0	0	0	0
AT1G11290	Carubv10011264	CARHR011540	Thhalv10011247	82	115	325	197	79	81	56	34	228	61	22	83	65	156	379	313	132	52	290	231	132	237	258	125	78	173	175	101	99	86	150	213	209	118	185	125	0	0	0	0	0	0	0	0	0	0
AT1G11300	Carubv10012649	CARHR011550	Thhalv10017759	405	744	422	306	312	537	252	662	365	308	206	496	394	688	276	277	192	340	88	223	55	121	160	330	112	345	70	125	132	212	75	234	72	100	109	129	1	12	9	9	11	37	0	26	4	9
AT1G11310	Carubv10008691	CARHR011560	Thhalv10007208	1561	9686	5511	8371	2003	6001	1353	5219	4466	4985	1176	4297	1790	9639	4928	10137	2127	3366	1937	27859	3051	5459	3070	5824	1975	24027	2936	5805	2834	3475	2117	26715	3590	6141	2384	4180	1873	7906	4629	4935	4213	7259	2018	6679	3601	3958
AT1G11320	Carubv10009253	CARHR011570	Thhalv10007713	178	229	209	117	182	205	116	180	158	141	156	219	149	205	190	155	201	111	179	172	264	201	257	161	221	213	264	172	213	126	183	151	290	217	156	178	103	134	155	85	159	119	93	93	126	85
AT1G11330	Carubv10011980	CARHR011580	Thhalv10006785	547	2863	2020	2282	1398	2533	620	1290	1262	1213	676	2164	740	2424	1322	2151	1578	1683	344	962	540	404	505	425	238	1051	434	309	291	214	322	948	454	367	342	311	1235	5023	1766	1776	3059	5024	1083	3540	1185	1023
AT1G11360	Carubv10009983	CARHR011600	Thhalv10008352	1083	1067	1152	846	812	667	1014	986	1074	1021	744	748	1153	922	918	822	678	602	1504	2624	1675	1066	1106	1391	1690	2231	1671	1119	1225	956	1380	2265	1494	1216	1261	1350	798	852	802	822	574	665	838	472	714	929
AT1G11370	Carubv10009760	CARHR011880	Thhalv10009515	0	3	1	4	0	3	0	0	0	6	0	0	0	0	0	4	0	1	2	1	0	0	5	0	1	0	0	0	5	1	1	1	1	0	3	3	0	0	0	0	0	0	0	0	0	0
AT1G11390	Carubv10008587	CARHR011630	Thhalv10007063	644	946	1059	1057	879	809	434	522	752	624	606	752	644	828	767	846	1031	601	676	1155	390	673	1150	758	497	1145	550	477	831	725	635	1097	584	478	867	786	853	1372	1094	917	1688	2599	584	944	869	709
AT1G11400	Carubv10010225	CARHR011640	Thhalv10008698	899	1041	999	1111	965	912	796	843	879	940	552	887	964	1004	777	979	822	709	613	536	644	515	665	773	842	605	602	730	679	571	697	503	621	743	719	721	806	1034	845	865	1253	1934	630	641	674	1038
AT1G11410	Carubv10008301	CARHR011670	Thhalv10006766	248	337	281	169	530	426	197	175	200	123	237	330	307	295	259	204	579	231	541	240	157	240	612	375	380	186	260	302	341	208	458	218	386	259	584	313	187	262	263	107	200	71	186	159	193	72
AT1G11430	Carubv10010192	CARHR011710	Thhalv10008605	2640	2400	4522	2263	3476	2218	3240	2378	4635	3104	2594	2211	3451	2104	3274	2932	2628	2012	3322	1381	1487	2016	2374	1343	3178	1956	2879	2166	2592	1132	2556	1873	3392	2668	2613	1596	1527	1152	3929	1451	1034	402	1467	852	2764	1460
AT1G11440	Carubv10009508	CARHR011720	Thhalv10009480	314	248	386	320	366	277	411	191	309	370	428	303	290	208	250	285	260	178	654	201	216	445	457	285	345	143	400	483	331	219	553	146	535	405	548	277	319	264	368	281	298	252	416	101	416	330
AT1G11475	Carubv10018490	CARHR011740	Thhalv10009269	1497	1173	2152	1312	2392	1484	2084	1465	1879	2172	2054	1487	1743	969	1295	1085	1547	1315	1	2	4	3	1	1	3	2	0	7	3	4	1	5	4	3	1	4	811	934	729	489	832	700	818	490	566	616
AT1G11480	Carubv10008685	CARHR011750	Thhalv10007161	1410	2194	2064	2045	1433	1350	1422	1381	1610	1804	637	1434	1402	1923	2000	2537	1678	1248	1302	918	843	1864	1128	1307	1314	1013	1741	1848	886	1221	1087	896	2216	1859	941	1293	1416	2336	1811	1992	2012	2768	1160	1093	1204	1446
AT1G11490	Carubv10012610	CARHR011760	Thhalv10007989	15	9	7	10	2	5	1	4	3	0	9	3	6	4	13	5	6	1	4	7	3	9	11	0	6	4	2	2	5	5	4	6	5	4	12	3	29	59	17	3	30	22	11	11	12	7
AT1G11500	Carubv10010526	CARHR011780	Thhalv10009712	0	7	13	4	6	9	7	4	13	9	0	2	10	6	3	3	11	3	13	20	13	20	7	18	3	14	15	8	13	4	5	11	12	12	1	9	6	15	13	14	14	12	8	10	3	8
AT1G11530	Carubv10010679	CARHR011800	Thhalv10009112	454	375	943	931	328	239	539	384	1038	1481	229	331	524	301	1073	1087	218	199	216	91	2774	1535	20	49	208	59	2096	1939	23	29	140	104	2141	1580	37	49	67	89	1170	2014	157	324	87	54	1285	2148
AT1G11540	Carubv10011874	CARHR011820	Thhalv10007599	92	237	143	168	166	177	101	119	146	142	124	189	114	123	172	189	117	107	0	0	23	12	3	0	13	6	12	9	16	5	2	5	9	4	2	3	7	19	15	12	9	4	2	12	13	14
AT1G11545	Carubv10009849	CARHR011830	Thhalv10008296	677	339	724	222	757	262	797	312	576	241	459	405	810	404	437	212	503	279	1386	609	1134	684	682	416	1174	374	958	647	610	424	1136	602	1047	610	708	388	845	724	1151	189	380	124	778	335	613	206
AT1G11560	Carubv10011840	CARHR011840	Thhalv10008090	0	0	1	0	0	0	0	0	0	0	0	0	0	1	1	0	1	0	0	0	1	0	0	0	0	0	0	0	0	0	0	0	0	0	0	0	1	1	0	0	0	0	9	0	0	2
AT1G11570	Carubv10010585	CARHR011850	Thhalv10010016	22	25	30	24	45	29	16	13	13	25	10	30	9	25	28	18	22	19	35	53	41	57	39	34	13	13	36	39	25	3	26	35	41	29	39	23	16	15	9	11	0	11	4	6	1	8
AT1G11572	Carubv10012507	CARHR011860	Thhalv10009211	0	3	0	2	2	37	5	7	0	2	26	10	7	2	5	1	6	11	0	0	0	0	0	0	0	0	0	0	0	0	0	0	0	0	0	0	0	1	0	0	0	0	0	0	0	0
AT1G11580	Carubv10008769	CARHR011870	Thhalv10007263	2914	4772	5716	4737	6796	5475	2236	2223	3909	3344	3920	4728	2550	3653	3430	3891	4553	2996	1547	1444	2271	3380	2748	3169	1633	2071	2153	2455	1874	1624	1250	1187	1939	3286	1651	1326	2338	2807	3367	3198	2897	2250	1739	1274	1887	1886
AT1G11600	Carubv10008888	CARHR011910	Thhalv10007399	340	241	416	53	361	124	133	162	385	66	168	212	204	295	118	64	157	166	861	459	417	227	1855	949	349	258	343	103	764	403	601	323	390	219	965	612	366	263	354	98	273	124	251	114	130	61
AT1G11620	Carubv10011712	CARHR011920	Thhalv10000539	0	0	0	0	0	0	0	0	0	0	0	0	0	0	0	0	0	0	0	0	0	0	2	0	0	0	0	0	0	1	0	0	1	2	0	0	5	6	0	6	8	3	1	0	2	0
AT1G11630	Carubv10009327	CARHR011930	Thhalv10007792	380	408	474	378	409	329	286	288	367	259	218	398	465	442	372	339	391	283	320	180	227	184	224	240	273	167	169	157	211	117	258	197	273	168	199	155	322	260	284	135	292	244	257	153	218	111
AT1G11650	Carubv10009124	CARHR011940	Thhalv10007819	6429	7908	11958	10353	8936	6840	7280	6745	10624	11902	6610	6971	6707	7033	9853	11734	7226	6341	5734	5566	5516	8344	5688	6085	6227	6050	8439	9269	5742	4715	5343	5229	8317	8379	5611	5501	3635	4218	6420	5120	3995	3584	3577	2685	5258	4649
AT1G11655	Carubv10011897	CARHR011960	Thhalv10009573	4	0	24	3	9	1	13	2	9	0	8	2	7	1	11	7	22	0	0	0	8	1	2	0	5	1	3	0	1	2	1	1	3	0	0	0	1	7	13	6	7	3	6	8	1	8
AT1G11660	Carubv10008380	CARHR011970	Thhalv10006883	985	1474	1736	1452	1016	945	914	865	1275	1162	773	955	1186	1445	1628	1733	1492	713	1246	1402	647	1080	1026	896	1235	1694	1026	1023	1049	696	974	1193	1103	961	1187	872	1117	1149	1625	1534	1744	1859	817	840	1312	1108
AT1G11670	Carubv10008916	CARHR011980	Thhalv10007409	514	866	803	501	811	498	405	460	607	298	517	588	629	634	770	536	707	347	241	598	362	457	536	531	357	838	318	286	241	417	331	692	212	288	336	309	77	306	84	52	268	168	60	137	51	23
AT1G11680	Carubv10008973	CARHR011990	Thhalv10007480	2465	2354	3714	2143	3960	2555	2371	1663	2601	1783	1961	2374	2511	2453	2563	2664	3333	2059	3691	2057	2660	3714	3927	2828	3175	1685	3638	3703	3176	2553	3259	1859	3912	3918	3515	2634	1799	1377	2212	1774	1957	1413	1896	861	1878	1211
AT1G11690	Carubv10010144	CARHR012000	Thhalv10009979	0	0	0	0	0	0	0	1	0	0	0	0	0	0	0	0	0	2	5	6	3	2	10	22	10	9	11	11	21	4	6	2	6	15	15	11	70	59	28	36	59	47	58	34	46	31
AT1G11700	Carubv10010311	CARHR012010	Thhalv10008790	294	174	289	107	579	354	252	193	236	107	266	305	236	183	158	99	637	347	1206	359	549	437	1730	1453	1035	227	461	374	1755	781	1147	243	640	375	1681	1446	1000	481	558	447	1216	614	1051	188	625	301
AT1G11710	Carubv10012420	CARHR012020	Thhalv10007012	121	128	202	124	280	150	90	83	139	83	95	148	167	154	169	113	325	123	147	32	76	95	238	104	102	30	38	57	95	73	89	46	97	38	140	98	179	124	188	132	277	205	123	74	160	75
AT1G11720	Carubv10011175	CARHR012030	Thhalv10006631	1234	1500	1634	759	1272	1052	986	679	1139	493	807	1107	1168	1657	1572	1121	1529	698	4132	1810	1089	2367	5680	2491	1883	1464	2038	1566	2466	1493	3056	1630	2231	1572	3969	1923	744	511	1086	386	664	371	522	373	675	266
AT1G11730	Carubv10009427	CARHR012040	Thhalv10007904	82	63	93	33	93	30	45	96	116	47	49	63	79	75	62	25	34	36	87	81	58	32	80	45	62	72	85	27	101	52	68	54	59	37	86	36	7	17	10	6	7	7	4	8	4	2
AT1G11750	Carubv10010008	CARHR012060	Thhalv10008442	2761	2959	4154	2205	3086	1854	2855	2449	3897	2512	1791	2305	3212	2709	3414	2765	2791	1880	4654	3086	3837	2757	3052	2607	4151	3560	3900	3797	3122	1650	3670	3467	4077	3552	3265	2398	2568	2707	3286	1898	2026	1745	2846	1960	2618	2122
AT1G11755	Carubv10012283	CARHR012070	Thhalv10008545	284	265	589	459	387	355	345	267	527	385	246	358	502	252	483	457	391	247	200	144	364	261	209	155	250	172	280	330	211	157	282	154	428	401	199	171	348	281	399	392	349	333	339	195	363	424
AT1G11760	Carubv10010459	CARHR012080	Thhalv10008721	253	217	274	241	237	222	220	148	250	292	131	245	226	207	278	257	182	197	488	460	590	464	483	507	387	445	509	496	531	365	423	457	525	539	435	452	340	457	311	321	356	436	292	228	259	307
AT1G11765	Carubv10011450	CARHR012100	Thhalv10002162	0	0	0	0	0	0	0	0	0	0	0	0	0	0	0	0	0	0	0	0	0	0	0	0	0	0	0	0	0	0	0	0	0	0	0	0	1	0	0	0	0	0	1	0	0	0
AT1G11770	Carubv10011431	CARHR012110	Thhalv10007344	0	0	0	0	0	0	0	0	0	0	0	0	0	0	0	0	0	0	0	0	4	0	0	0	0	0	0	0	0	0	0	0	0	0	0	0	0	1	0	0	1	0	0	0	0	2
AT1G11780	Carubv10009622	CARHR012120	Thhalv10008060	359	458	575	423	624	522	288	332	491	452	400	423	465	462	482	433	724	407	587	1054	535	434	538	497	704	1029	517	471	645	393	571	982	587	558	549	412	359	377	449	281	490	484	313	234	323	283
AT1G11790	Carubv10009627	CARHR012130	Thhalv10007886	691	866	1108	720	1112	926	490	579	965	635	610	998	809	1018	895	738	1057	765	1235	1807	1130	448	803	573	852	1758	1022	493	676	413	932	1552	795	515	868	528	327	364	483	227	270	188	353	228	314	228
AT1G11820	Carubv10012467	CARHR012150	Thhalv10006713	1981	1535	1816	1159	2562	1840	1351	1038	1507	977	1654	1943	2118	1457	1688	1380	2479	1430	905	225	487	397	1379	562	641	339	552	292	877	572	719	283	555	354	1190	602	1160	647	1249	400	1115	505	900	436	956	289
AT1G11840	Carubv10009942	CARHR012160	Thhalv10008377	5932	7028	9612	3298	8241	4765	7612	5658	8302	4312	7358	5625	5782	6402	4939	3024	7517	4414	3724	4352	6755	2842	4631	3085	4325	4357	5048	2935	5398	1853	4176	3288	4480	3335	4506	2674	1401	1700	1631	737	1588	847	1186	1098	1159	690
AT1G11860	Carubv10009236	CARHR012170	Thhalv10007781	17626	19494	25552	12979	15868	12172	15610	12764	22677	11744	11916	16631	20779	21057	23795	19516	17762	12796	22882	14065	11462	15288	19632	10699	12111	11964	19819	14097	15582	8913	16643	13405	21068	13461	26923	14473	13143	12907	22357	9238	10525	6344	12035	7134	15335	8682
AT1G11870	Carubv10012421	CARHR012190	Thhalv10009769	762	842	1349	683	920	616	667	567	1103	611	528	717	830	851	996	901	854	536	2357	1334	1554	1728	2214	1229	1911	1625	2050	1681	1697	1021	1835	1591	2133	1631	1752	1147	1437	1709	1671	761	1175	1014	1243	1109	1145	612
AT1G11880	Carubv10008966	CARHR012200	Thhalv10007452	229	197	180	190	201	196	199	190	196	203	160	174	252	156	180	175	175	132	332	381	415	316	177	194	237	321	336	355	235	151	283	324	397	330	235	174	355	283	299	317	308	292	318	171	266	294
AT1G11890	Carubv10010262	CARHR012210	Thhalv10008741	1019	1817	1626	1536	1650	1643	1099	1565	1328	1475	1268	1650	1337	1517	1006	1263	1517	1321	918	1516	1791	1070	732	896	1117	1872	1237	1413	894	772	988	1359	1271	1288	804	830	1679	2476	1551	2156	1582	2258	1533	1721	1568	1848
AT1G11900	Carubv10012108	CARHR012220	Thhalv10007999	73	99	136	132	70	68	85	69	109	82	42	75	84	78	113	84	78	56	44	41	111	58	71	49	55	57	57	67	54	32	69	55	81	72	42	68	92	94	105	91	93	139	68	59	84	73
AT1G11905	Carubv10012392	CARHR012230	Thhalv10008726	363	698	613	725	542	635	381	514	496	574	308	608	453	502	401	527	372	458	379	1498	821	498	380	812	643	2194	498	611	433	468	446	1467	443	523	553	672	290	551	227	293	318	750	211	385	185	295
AT1G11910	Carubv10008798	CARHR012240	Thhalv10007418	11255	10391	15162	15823	16057	16799	12665	9126	11917	18471	11075	13634	10679	9054	11746	18642	14388	12566	7730	6092	9316	12648	6649	9718	9107	6613	10506	15102	6906	8099	7630	5571	11062	11876	7849	8956	7505	9064	21655	21732	12487	18942	7865	5108	16677	18586
AT1G11915	Carubv10009711	CARHR012250	Thhalv10008171	21	26	21	15	20	15	17	12	10	0	3	14	13	21	24	9	17	12	14	18	12	12	21	6	2	11	5	10	10	12	9	6	17	10	13	9	27	20	27	17	28	18	16	16	7	6
AT1G11925	Carubv10010604	CARHR012270	Thhalv10009060	0	41	5	54	0	41	0	25	0	34	0	30	0	73	5	19	0	8	0	106	27	49	2	287	1	81	3	21	4	45	18	16	12	27	2	85	40	90	130	17	11	30	39	59	103	34
AT1G11930	Carubv10010142	CARHR012280	Thhalv10008483	1601	1525	2330	2074	1609	1778	1535	1198	1886	1899	711	1681	1631	1331	1667	1888	1244	1215	2445	2144	1763	2074	2078	2219	2868	2344	2591	2886	2469	1671	2317	1943	2868	2650	2388	2415	1706	2276	2165	1682	1975	2261	1683	1173	1787	1948
AT1G11940	Carubv10009428	CARHR012290	Thhalv10007925	236	263	243	200	166	149	258	263	267	206	113	133	247	247	158	186	147	115	149	162	98	131	72	117	142	121	140	179	94	75	146	93	131	152	96	105	289	349	336	349	198	296	249	183	231	381
AT1G11950	Carubv10011915	CARHR012300	Thhalv10006772	222	250	519	321	292	214	172	130	385	293	92	252	247	275	420	376	318	172	256	107	209	324	558	329	194	123	270	248	303	219	206	136	314	273	315	244	245	272	300	182	405	329	178	180	182	154
AT1G11960	Carubv10008363	CARHR012310	Thhalv10006870	215	457	537	384	297	247	181	235	458	236	140	285	243	458	561	381	420	247	318	210	334	315	421	293	306	239	512	333	264	121	296	241	545	375	377	242	517	677	329	245	903	1410	414	365	303	162
AT1G11990	Carubv10011821	CARHR012320	Thhalv10007119	4	1	10	4	5	1	1	0	12	2	0	4	11	6	10	6	5	1	41	36	28	11	89	16	84	59	42	23	102	18	43	57	43	9	46	11	5	13	5	2	3	0	2	4	5	4
AT1G12000	Carubv10008719	CARHR012330	Thhalv10007237	3078	3701	4879	2068	4007	2378	2566	2163	3445	1839	2625	3375	3160	3574	3008	2798	4905	2771	3358	2190	2021	2033	3115	2383	3292	2950	2929	2054	2943	2207	2823	1987	2124	2005	3117	2152	2473	2447	2474	2399	1835	1692	1572	1596	1902	1477
AT1G12020	Carubv10010193	CARHR012370	Thhalv10010010	341	136	566	234	774	338	399	175	456	220	377	270	432	194	360	209	514	304	504	117	280	306	646	383	289	110	381	305	494	276	479	116	418	275	687	465	86	32	94	38	160	93	65	14	64	39
AT1G12030	Carubv10009904	CARHR012380	Thhalv10009327	12	19	78	45	83	64	37	81	74	73	10	56	35	43	27	32	80	141	32	57	41	20	135	96	10	11	17	20	97	79	40	29	48	16	119	136	32	41	18	13	197	129	38	34	23	18
AT1G12040	Carubv10011166	CARHR012400	Thhalv10006975	44	165	318	43	346	72	142	94	223	37	98	72	172	192	194	145	410	54	1	33	94	24	128	51	76	38	67	41	76	15	47	33	49	14	52	10	51	347	150	103	165	103	81	88	85	48
AT1G12050	Carubv10009247	CARHR012410	Thhalv10007724	1090	929	1783	1491	1051	881	943	762	1436	1307	790	952	914	829	1447	1775	1070	750	1495	1072	1139	2296	1181	1515	1294	1110	1864	2659	1197	1426	1348	1040	1860	2042	1256	1336	1262	1281	2509	2823	1379	1789	1270	759	1963	2380
AT1G12060	Carubv10012322	CARHR012420	Thhalv10008770	94	95	106	41	128	51	74	81	104	55	64	84	62	82	58	38	126	66	214	321	113	149	168	174	203	210	231	160	198	145	214	225	173	122	207	222	101	129	80	41	90	99	79	63	49	30
AT1G12064	Carubv10010850	CARHR012430	Thhalv10009916	10	1	2	0	3	0	0	5	1	2	24	2	3	1	1	2	8	3	6	0	4	1	0	3	0	0	0	2	3	0	1	1	0	0	2	2	4	3	2	2	0	4	9	5	0	2
AT1G12070	Carubv10012423	CARHR012440	Thhalv10009559	10	10	11	4	10	3	15	3	13	13	4	6	7	9	13	4	3	6	0	0	15	2	5	8	2	0	0	3	5	4	0	2	1	1	5	0	1	5	1	4	0	0	1	3	0	0
AT1G12090	Carubv10011959	CARHR012450	Thhalv10009061	8532	5022	18784	4656	13058	6786	8395	4219	14607	4075	7649	8787	9743	7226	10503	5612	8429	7498	21706	5732	12335	6626	15641	10854	8558	2936	12095	6684	14307	9497	19662	4144	13842	8558	20985	11456	2849	2471	6619	1975	4551	1461	2265	1063	3415	1694
AT1G12100	Carubv10012658	CARHR012460	Thhalv10009083	34	20	37	16	23	21	44	24	21	6	49	21	54	20	23	10	13	23	323	74	172	119	650	447	409	112	184	180	630	258	287	78	232	217	463	226	433	219	329	194	411	109	386	98	281	158
AT1G12110	Carubv10008661	CARHR012470	Thhalv10007157	1736	2913	5096	4841	5917	8676	1598	1416	2828	2303	2406	6048	2158	2519	2749	5623	7724	5786	808	1191	2883	4501	3160	3042	1511	966	3879	3678	1746	2623	1468	995	2952	2280	2487	2359	1997	1050	3029	1821	5052	3807	1323	542	3331	1409
AT1G12120	Carubv10008871	CARHR012480	Thhalv10007497	1242	1054	1839	1502	1390	1259	1107	988	1811	1493	848	1236	1408	1151	1866	1371	1263	789	691	490	912	1163	906	814	692	460	1254	1308	835	586	753	403	1663	1323	721	660	1058	1009	1383	1499	1939	2578	830	521	1100	1440
AT1G12140	Carubv10011483	CARHR012490	Thhalv10007582	605	1193	1282	1198	1099	1391	611	576	929	910	649	1057	658	930	1029	1364	1470	778	177	165	155	196	376	326	128	232	234	202	264	229	236	142	235	211	361	211	347	268	313	289	309	205	279	119	224	298
AT1G12150	Carubv10010971	CARHR012500	Thhalv10007286	8	21	29	8	34	7	3	16	25	0	33	10	28	20	22	12	47	3	2	5	9	8	5	1	6	11	2	1	0	1	5	6	1	2	2	1	4	12	4	0	11	4	3	2	1	2
AT1G12200	Carubv10009065	CARHR012510	Thhalv10007557	321	1703	1691	2032	859	1359	176	979	966	1353	392	1061	255	1428	716	1285	542	826	779	1163	812	1920	684	1054	498	972	1330	1593	533	554	671	825	1633	1228	769	681	176	1183	2117	4695	2407	6468	199	866	1345	4139
AT1G12230	Carubv10009318	CARHR012530	Thhalv10007790	2886	2537	2565	1769	2543	1482	3465	2879	2551	3049	2362	1920	2938	2433	2241	2313	1694	1407	1579	1179	1370	1672	1090	863	1105	1077	1679	1435	799	628	1232	981	2336	2008	1243	806	1571	1579	2366	1205	946	733	1425	826	1435	1261
AT1G12244	Carubv10012184	CARHR012550	Thhalv10008640	358	135	303	149	303	187	339	213	335	270	344	179	343	248	283	149	269	165	324	103	194	170	112	93	251	97	177	193	145	89	270	141	226	198	231	134	545	555	433	346	451	507	514	318	342	412
AT1G12250	Carubv10012683	CARHR012560	Thhalv10008422	1396	921	1264	857	1067	841	1071	789	1283	1135	562	796	1292	1003	1290	1247	736	691	1952	1390	1338	1205	700	669	1394	1081	1628	1455	588	424	1375	1008	1810	1507	1057	805	2071	2543	2726	1420	1186	1053	2593	1169	1634	1623
AT1G12260	Carubv10009366	CARHR012570	Thhalv10007823	27	65	60	28	67	20	16	17	37	2	21	28	33	58	34	50	71	25	11	17	14	28	23	21	5	14	23	19	13	9	24	10	19	29	32	7	17	35	40	23	27	39	10	19	20	16
AT1G12270	Carubv10011737	CARHR012580	Thhalv10007205	1470	1627	2665	1749	2008	1514	1601	1182	2115	1800	1567	1720	1794	1703	2067	2008	2460	1325	3	2	6	0	2	4	0	63	4	51	6	1	2	0	2	0	0	1	2020	2446	2379	2167	2645	3183	1555	1521	2004	1767
AT1G12290	Carubv10008383	CARHR012600	Thhalv10006784	145	274	168	245	135	255	108	133	103	96	104	210	111	169	169	232	163	155	231	332	262	511	269	786	521	541	213	588	197	510	175	303	236	503	166	470	447	527	406	424	511	839	351	286	516	328
AT1G12310	Carubv10011992	CARHR012610	Thhalv10009022	1878	1589	2311	1689	2141	1571	1588	1492	2055	1751	1699	1872	1817	1583	1203	1506	1505	1718	1613	1726	2020	1240	1318	1484	1690	1628	1520	1389	1511	1354	1469	1456	1337	1165	1364	1411	1840	2388	1491	1287	1705	1496	1791	1218	1202	1113
AT1G12320	Carubv10010287	CARHR012620	Thhalv10008740	189	245	197	321	337	381	121	172	175	305	279	387	129	165	119	189	173	259	82	147	90	37	171	332	95	138	36	90	133	115	57	61	41	41	123	114	126	393	81	57	108	157	88	155	54	38
AT1G12330	Carubv10008918	CARHR012630	Thhalv10007416	533	265	425	166	440	244	423	259	460	294	425	296	474	369	339	186	332	246	647	473	324	432	824	763	716	384	599	598	651	512	587	436	619	478	703	645	670	485	801	527	863	711	723	221	633	405
AT1G12350	Carubv10012548	CARHR012640	Thhalv10014147	676	670	887	749	825	808	792	822	760	1002	673	739	696	608	593	772	656	582	565	458	652	600	534	544	667	414	704	708	623	382	509	408	715	686	517	486	595	671	766	579	624	559	600	408	579	658
AT1G12360	Carubv10011323	CARHR012650	Thhalv10007001	1595	5060	2302	3031	1650	1991	1765	3292	1914	2731	1302	2110	1683	4491	2142	2866	1518	1471	3148	7872	3522	3107	1591	2959	2678	8441	3634	3330	1389	2171	2139	7169	3625	2832	1644	2136	2150	7074	2956	4077	2054	5276	2084	5102	2169	3440
AT1G12370	Carubv10011602	CARHR012660	Thhalv10007458	195	181	381	184	1373	733	181	135	371	208	684	588	218	162	255	139	644	351	268	219	116	172	1243	1101	354	271	165	203	718	456	217	224	140	136	665	677	350	399	477	299	1121	1086	272	229	341	308
AT1G12380	Carubv10011100	CARHR012670	Thhalv10006821	156	132	260	72	257	179	87	42	185	60	140	251	152	175	153	100	253	163	131	72	41	148	315	166	98	81	125	90	153	129	139	83	148	139	216	134	333	727	493	508	936	1396	272	426	384	373
AT1G12390	Carubv10012074	CARHR012680	Thhalv10023753	493	444	626	517	496	491	400	390	560	661	322	432	476	400	509	504	463	323	527	415	663	462	384	433	446	508	617	597	396	356	539	482	689	631	444	399	820	878	789	823	912	817	787	495	707	813
AT1G12410	Carubv10009963	CARHR012700	Thhalv10008424	3058	3567	5041	3022	4035	2699	2774	2747	4675	3117	2886	3277	3319	3789	4368	3829	3781	2726	5183	3893	4735	3439	4203	3499	5041	4544	4334	4297	4167	2588	4128	3702	4395	4259	4240	3217	3529	4096	4568	2580	3564	2806	3726	2623	3582	2866
AT1G12420	Carubv10009162	CARHR012710	Thhalv10007972	155	266	282	192	476	249	155	147	228	104	288	319	174	222	167	140	330	218	298	316	274	173	492	466	431	522	331	229	346	266	228	251	190	170	301	364	257	641	305	290	582	816	193	487	324	273
AT1G12430	Carubv10008202	CARHR012720	Thhalv10006731	841	840	1408	798	1102	764	718	586	969	833	643	789	890	826	1145	929	1181	614	2307	1566	1144	2165	2144	1731	2131	1639	1844	1811	1531	1337	1821	1595	1975	1680	1939	1658	799	460	845	404	837	511	573	275	508	331
AT1G12440	Carubv10010492	CARHR012730	Thhalv10008959	4268	3770	4802	4123	2905	2261	4113	3712	4647	5321	2758	2776	4279	3348	3936	4042	2519	2358	2657	2482	3228	2427	1239	1483	2224	2252	2558	2406	1055	1208	2247	2451	2771	2294	1948	1704	1449	1814	1704	1678	1696	1533	1548	954	1510	1596
AT1G12450	Carubv10009868	CARHR012740	Thhalv10008347	215	163	347	256	133	123	119	93	213	157	71	138	206	209	350	215	159	94	633	504	779	667	331	308	649	429	793	852	295	245	594	478	758	689	458	404	263	384	323	199	246	233	285	279	257	243
AT1G12470	Carubv10008200	CARHR012770	Thhalv10006686	1149	1867	1616	1442	1259	1141	1054	1052	1196	1286	858	1213	1330	1672	1530	1694	1531	846	2068	1472	1372	2315	1788	1528	1659	1655	1716	1995	1138	993	1632	1492	2336	1979	1539	1219	1563	1920	2190	1911	1870	2232	1208	1115	1590	1490
AT1G12480	Carubv10011981	CARHR012780	Thhalv10007262	83	108	166	124	103	97	71	98	108	85	31	74	151	107	76	94	69	81	116	85	70	60	486	330	137	68	46	46	239	271	167	102	87	46	436	261	84	121	52	32	115	103	89	52	29	34
AT1G12500	Carubv10009549	CARHR012790	Thhalv10008006	1615	1383	1697	925	2359	1659	1592	1261	1386	998	1632	1487	1726	1409	1219	881	1923	1171	1218	502	515	782	1748	1248	1119	481	861	722	1637	768	1229	481	922	653	1516	967	544	572	671	463	1091	662	621	267	475	338
AT1G12520	Carubv10011816	CARHR012800	Thhalv10008232	2661	2381	3224	3501	3678	3008	1736	1557	1668	2814	1336	1977	2199	1370	2802	3539	2125	2261	1896	1616	1382	3877	1672	2744	2068	1650	2232	4069	1687	1847	1190	1525	4422	5268	2179	2410	481	834	761	1253	933	1600	374	442	472	1286
AT1G12530	Carubv10012364	CARHR012820	Thhalv10008831	401	330	520	432	513	457	525	392	452	623	596	440	462	296	394	401	443	338	232	165	367	295	153	202	322	190	351	440	215	128	278	132	398	387	210	226	352	281	322	301	421	528	332	161	284	370
AT1G12550	Carubv10009669	CARHR012830	Thhalv10008209	74	54	112	50	132	114	93	64	113	64	109	86	86	70	72	52	105	76	252	471	178	248	301	287	244	360	329	213	318	262	247	296	275	329	280	327	183	181	223	192	344	271	189	96	198	172
AT1G12560	Carubv10011828	CARHR012840	Thhalv10008503	31	274	216	36	181	70	89	113	163	34	106	54	142	260	146	101	243	41	0	3	25	17	23	10	23	16	9	11	18	2	11	7	16	1	25	1	28	146	44	25	55	27	35	80	29	26
AT1G12570	Carubv10008714	CARHR012850	Thhalv10007216	44	69	53	23	37	28	42	43	49	13	19	15	47	42	54	18	29	10	47	76	36	39	48	18	37	35	58	27	37	12	50	65	67	26	46	23	1	12	6	2	1	3	5	3	0	0
AT1G12580	Carubv10008851	CARHR012860	Thhalv10007365	1074	1561	1771	1563	1265	1300	1171	1184	1456	1247	696	1192	1305	1610	1581	1793	1300	962	1788	1319	1058	1481	2061	1885	1459	1325	1452	1465	1295	1299	1594	1508	1906	1630	1715	1422	2127	4954	2842	2764	2598	4534	1933	3495	2473	2476
AT1G12600	Carubv10009601	CARHR012870	Thhalv10008063	3	19	27	6	9	6	3	2	6	3	0	4	4	15	15	10	11	4	5	22	22	20	15	19	21	13	37	2	12	15	21	6	22	28	16	15	20	37	26	19	24	19	15	14	15	19
AT1G12610	Carubv10010303	CARHR012880	Thhalv10009978	0	6	1	3	0	0	11	1	0	0	0	0	0	1	0	3	0	0	0	0	2	0	0	0	0	4	0	0	2	0	1	4	0	0	1	0	1	0	4	0	0	0	4	4	2	0
AT1G12630	Carubv10012147	CARHR012920	Thhalv10009659	8	4	9	2	10	6	10	2	13	0	31	3	10	8	10	3	2	2	3	0	0	1	3	1	0	0	0	1	0	1	1	0	3	0	0	2	71	71	100	56	272	212	28	17	48	52
AT1G12640	Carubv10009061	CARHR012930	Thhalv10007564	669	1100	1241	1618	1266	1293	677	719	996	1213	710	1160	797	949	1228	1569	1275	919	830	642	734	1300	943	909	710	700	858	1111	728	760	877	650	1158	1008	873	808	529	801	845	928	1005	1409	582	464	662	877
AT1G12650	Carubv10010126	CARHR012940	Thhalv10008688	904	841	1452	1064	1832	1155	721	750	1333	1288	1067	1277	1164	834	984	809	1550	899	527	419	756	494	1132	963	1047	544	776	737	1312	529	766	378	807	857	751	609	1220	1226	1145	846	1391	1209	958	709	1022	887
AT1G12660	Carubv10010857	CARHR012970	Thhalv10009569	0	0	0	0	0	0	0	0	0	0	0	0	0	0	0	0	0	0	0	0	0	0	0	0	0	0	0	0	0	0	0	0	0	0	0	0	0	1	0	0	0	0	0	0	3	0
AT1G12663	Carubv10011831	CARHR035990	Thhalv10023017	0	0	0	0	0	0	1	0	0	0	0	0	0	0	0	0	0	0	0	0	0	0	0	0	0	0	0	0	0	0	0	0	0	0	0	0	0	0	0	0	0	0	0	0	0	0
AT1G12680	Carubv10009041	CARHR012990	Thhalv10007542	599	818	692	707	556	626	523	607	497	573	362	577	561	767	560	684	474	408	844	1027	411	764	743	828	767	1013	653	845	493	608	782	955	833	741	753	710	571	1005	703	672	615	942	538	645	480	644
AT1G12710	Carubv10009895	CARHR013010	Thhalv10008388	91	151	530	358	226	178	91	128	400	337	108	186	142	122	511	308	210	121	285	429	424	315	342	388	309	448	465	312	301	287	289	509	446	315	292	354	214	769	465	280	324	679	127	578	326	333
AT1G12740	Carubv10020186	CARHR013030	Thhalv10007534	181	549	612	98	664	128	266	280	465	72	247	114	378	565	539	183	555	67	4	121	15	3	8	116	3	128	2	4	2	39	4	127	2	20	1	30	78	265	83	46	66	71	27	98	24	23
AT1G12750	Carubv10011917	CARHR013040	Thhalv10008314	848	1181	696	652	694	790	593	1001	697	644	534	855	639	992	499	544	409	579	111	120	76	74	110	127	117	93	92	106	98	124	90	131	78	106	115	99	3	8	32	78	33	79	15	19	63	62
AT1G12760	Carubv10009353	CARHR013050	Thhalv10007780	1640	5066	2429	3146	1907	2559	1330	2762	1847	2442	1269	2261	1805	4072	2158	2880	1836	1959	1971	3203	2089	2458	1943	2349	1992	2814	2100	2441	1597	2031	1836	2966	2140	2041	1972	2314	2075	4228	2873	3263	2987	4880	1910	2548	2336	2785
AT1G12770	Carubv10008776	CARHR013060	Thhalv10007276	1253	1095	2828	1240	1460	959	1086	905	2116	1292	929	1178	1522	1264	2174	2078	1529	945	2106	1518	1104	2216	2076	1283	1680	1409	2103	1582	1744	1168	1840	1386	2428	1898	1948	1528	2059	1573	3081	1256	1402	717	1646	964	2074	996
AT1G12790	Carubv10012622	CARHR013100	Thhalv10008579	185	310	231	301	119	121	117	191	228	227	45	113	184	249	323	284	131	71	83	32	59	57	42	24	23	40	47	44	15	16	58	32	48	43	46	15	211	286	231	188	165	174	195	163	152	235
AT1G12800	Carubv10008376	CARHR013110	Thhalv10006889	4401	6080	5889	2437	3966	3099	3339	2602	4536	1916	2233	3377	4783	5701	5105	3799	4919	2194	7538	3289	1610	3678	6447	2719	3536	2812	3825	2805	3761	2219	4988	3359	4039	2768	5882	3271	5942	5662	5921	2563	3626	1939	5190	3484	4184	2240
AT1G12805	Carubv10010879	CARHR013120	Thhalv10009512	18	7	80	13	47	46	26	0	22	9	0	15	3	90	13	10	33	14	1	1	1	12	0	5	20	4	10	42	7	0	13	4	11	40	1	5	0	0	3	20	4	3	1	0	4	27
AT1G12810	Carubv10011061	CARHR013130	Thhalv10009108	677	599	865	944	888	837	798	698	748	1293	609	596	567	463	535	830	501	613	490	429	577	793	322	480	376	412	711	761	373	437	427	380	791	714	371	519	336	664	1176	1005	682	830	296	358	1093	1037
AT1G12820	Carubv10012250	CARHR013140	Thhalv10007195	1327	1228	1679	1251	1249	1160	1244	887	1324	1139	907	1450	1343	1154	1210	1421	1123	1051	1554	806	829	1285	683	678	957	674	1226	1214	562	951	1228	708	1539	1376	975	913	2449	2771	2853	2174	2392	2456	2106	1376	2372	2445
AT1G12840	Carubv10009467	CARHR013160	Thhalv10007948	3176	4736	5419	4454	4093	4216	3152	3224	4590	3930	3131	3956	3640	4199	4647	5450	4618	3423	4519	3366	8759	6019	4791	3554	3399	3687	5538	5237	4444	3166	4218	3358	6104	5092	4711	3941	3725	5150	5232	5273	5185	5393	3546	2941	4808	4077
AT1G12845	Carubv10012535	CARHR013170	Thhalv10010043	128	61	384	112	213	90	149	105	273	163	158	103	134	121	149	117	139	152	56	24	79	53	111	60	59	44	85	62	129	36	68	46	97	57	143	92	187	171	307	211	217	134	259	88	247	216
AT1G12850	Carubv10009343	CARHR013180	Thhalv10007881	1145	1050	1482	1092	1318	1208	1031	870	1286	1013	988	1250	1172	995	1003	917	1344	918	387	142	187	205	383	369	319	174	269	170	419	323	406	161	278	204	344	262	1392	1277	1099	1067	1932	1964	1066	720	990	789
AT1G12860	Carubv10009081	CARHR013190	Thhalv10007566	1076	703	1602	753	998	688	876	615	1427	637	715	934	1148	827	1226	841	850	532	1256	420	489	702	1013	685	788	318	732	716	706	500	886	356	862	735	739	704	681	472	601	334	625	324	647	258	430	290
AT1G12880	Carubv10010219	CARHR013210	Thhalv10008801	368	635	443	372	457	353	367	813	329	609	245	315	357	557	243	250	258	280	58	276	64	40	53	100	84	253	47	65	49	54	29	186	48	96	58	55	98	87	90	73	57	77	82	75	82	81
AT1G12890	Carubv10012659	CARHR013220	Thhalv10008615	3	8	5	1	9	11	0	6	5	0	14	15	1	10	0	7	8	7	14	7	28	23	19	34	20	11	14	21	28	32	16	35	24	18	29	11	45	31	34	19	42	47	24	10	30	19
AT1G12900	Carubv10009349	CARHR013230	Thhalv10007809	25318	27575	18521	8745	18648	13929	20970	16868	16240	7574	12673	18256	28429	28204	18894	13199	18374	11848	33653	16440	19513	11365	22125	9850	11998	11950	14854	10021	13048	9391	21389	16174	16831	8742	29319	14254	13940	15539	15864	7448	9791	5150	13853	8705	11514	7995
AT1G12920	Carubv10009183	CARHR013260	Thhalv10007678	3379	4191	5697	4233	5412	3854	2822	3050	4323	3293	2915	4226	4292	3804	4242	4038	5353	3030	2521	1052	1762	1896	3546	2007	2693	1726	2287	2123	2913	1557	2351	1484	2516	1974	2646	1915	0	3	0	0	0	0	0	0	0	0
AT1G12930	Carubv10011575	CARHR013280	Thhalv10006676	707	532	1043	711	786	608	647	486	755	664	581	688	816	620	897	934	829	439	916	267	383	846	687	412	581	350	669	785	539	397	627	373	784	629	667	481	855	603	896	533	883	676	593	348	632	519
AT1G12940	Carubv10008932	CARHR013290	Thhalv10007446	3	13	17	123	30	741	4	7	7	42	48	448	6	2	2	126	33	216	2	2	7	7	34	58	15	0	27	7	26	70	1	0	3	7	0	31	227	276	164	84	134	171	126	244	345	61
AT1G12950	Carubv10011529	CARHR013300	Thhalv10007376	66	192	166	65	208	123	97	112	82	58	78	97	67	231	106	87	188	81	148	106	176	276	653	687	211	137	242	269	356	687	154	94	146	220	263	365	12	63	32	23	18	24	11	13	25	18
AT1G12970	Carubv10009069	CARHR013310	Thhalv10007575	292	497	378	420	130	200	263	321	311	357	187	256	309	405	360	435	237	188	405	257	668	703	210	268	406	278	730	746	191	233	371	250	759	624	281	307	346	503	298	276	374	578	341	328	221	223
AT1G12980	Carubv10011023	CARHR013320	Thhalv10009647	3	2	7	2	11	3	1	4	3	12	5	19	10	10	3	4	2	18	0	0	0	1	0	0	0	2	1	1	1	0	2	1	0	0	0	1	0	0	0	4	3	0	0	0	0	0
AT1G12990	Carubv10009381	CARHR013330	Thhalv10007850	408	438	706	745	658	643	520	329	610	422	480	628	655	477	570	510	601	462	636	593	1121	728	550	438	663	551	996	831	478	344	572	617	1062	776	550	386	523	687	1352	1169	963	1497	393	372	1036	801
AT1G13000	Carubv10011103	CARHR013340	Thhalv10007793	567	1582	1098	1341	583	927	823	1188	920	1146	497	941	767	1483	943	1273	620	673	627	5434	1088	1298	412	826	642	4406	1200	1161	353	498	660	4209	1307	1172	501	801	981	3729	1183	1355	1328	2536	862	2405	871	1345
AT1G13020	Carubv10008811	CARHR013350	Thhalv10007279	978	1439	1716	1339	2023	1666	853	1017	1294	1143	1100	1681	969	1344	1230	1383	1846	1378	1225	1257	614	980	1585	1304	1148	1153	872	830	1592	1137	1017	1182	948	881	1454	1303	1376	1946	1371	1129	3109	3095	933	1066	1125	750
AT1G13030	Carubv10008617	CARHR013360	Thhalv10007108	381	321	717	339	711	429	321	228	476	266	412	573	414	365	469	383	773	380	447	197	415	427	728	412	401	281	383	370	454	242	305	225	398	353	425	346	468	315	525	288	581	539	330	221	402	213
AT1G13040	Carubv10012598	CARHR013370	Thhalv10007381	57	155	240	154	87	86	7	9	105	29	33	98	68	175	261	181	211	38	151	49	54	121	184	74	22	85	49	45	40	56	65	70	87	77	99	62	170	142	182	120	187	131	110	90	152	64
AT1G13050	Carubv10011087	CARHR013380	Thhalv10008230	167	111	225	131	160	113	151	87	204	137	82	107	184	132	167	116	136	118	116	102	28	111	114	164	151	145	139	117	115	128	118	103	170	147	95	122	126	104	126	61	71	45	73	42	75	61
AT1G13080	Carubv10008923	CARHR013430	Thhalv10007429	610	1404	221	292	1023	2682	646	536	166	203	627	1695	814	846	275	423	1885	1799	217	200	223	101	150	117	208	200	89	110	79	91	220	205	99	115	319	125	151	324	282	794	1326	1227	250	169	204	630
AT1G13090	Carubv10011330	CARHR013450	Thhalv10007466	681	490	1004	577	580	823	750	463	823	685	535	787	628	447	805	927	855	782	27	118	69	298	160	366	27	166	137	266	92	373	48	60	117	189	70	231	589	826	1118	1031	866	1330	558	560	1015	1003
AT1G13110	Carubv10015900	CARHR013480	Thhalv10007425	1726	15776	4360	10361	1445	10052	1989	8092	4045	6156	1391	6234	2057	9575	4057	9129	1824	5048	3	0	1	0	0	6	3	3	0	13	0	0	0	4	0	0	2	1	503	3930	1046	984	923	1609	547	2627	920	768
AT1G13120	Carubv10008625	CARHR013490	Thhalv10007079	730	851	1198	776	969	735	706	564	945	714	640	817	740	708	900	738	1064	593	656	385	398	635	781	572	638	393	502	548	539	340	626	439	736	644	664	532	661	666	1151	976	1169	1362	550	399	820	997
AT1G13130	Carubv10008758	CARHR013500	Thhalv10007253	0	7	9	4	7	3	0	0	5	2	3	6	0	19	0	4	15	0	0	0	0	0	1	0	3	0	2	3	1	1	1	0	0	0	0	0	0	0	4	1	0	1	0	0	0	0
AT1G13160	Carubv10008325	CARHR013530	Thhalv10005577	970	1268	2285	1335	2466	1571	751	734	1546	941	1055	1798	1269	1354	1744	1377	3093	1244	1078	770	1241	2416	2342	1761	1680	1117	2433	2499	2162	1326	1521	896	2681	2639	1474	1402	2814	2767	2900	2015	3789	3448	1761	1757	2175	1696
AT1G13170	Carubv10008320	CARHR013540	Thhalv10006816	770	631	1061	509	772	522	609	505	855	409	426	605	926	793	645	561	710	397	815	387	348	461	1009	543	730	427	584	434	812	388	746	344	581	410	770	532	1018	700	885	553	979	494	860	440	692	382
AT1G13180	Carubv10009216	CARHR013550	Thhalv10007702	270	542	548	465	319	338	343	408	467	451	205	324	344	553	454	481	306	209	615	813	522	615	401	379	568	1007	580	691	411	295	512	688	619	547	434	426	495	881	504	649	668	1231	401	563	409	544
AT1G13190	Carubv10008697	CARHR013560	Thhalv10007191	1005	1689	1531	1333	1086	944	741	883	1153	1003	428	921	1128	1525	1476	1573	1181	690	1590	1598	963	1020	1314	1027	1204	1841	1050	1100	1200	705	1140	1483	982	950	1348	885	1409	2294	1826	1297	1870	2061	1263	1212	1170	1187
AT1G13195	Carubv10010035	CARHR013570	Thhalv10008511	264	545	590	593	405	521	197	340	394	502	208	352	319	378	411	502	336	287	417	483	802	679	934	1113	396	432	681	744	644	534	429	406	641	738	594	671	258	677	553	622	959	1578	301	408	444	643
AT1G13210	Carubv10008116	CARHR013590	Thhalv10006589	717	10945	2588	4725	499	2720	510	4686	1910	2161	242	2159	707	12626	2235	4640	579	1238	590	14452	1029	2339	879	3879	962	17858	1257	2393	622	2687	513	14680	1102	2072	467	1775	535	8358	2330	3036	874	4725	645	8348	1940	2106
AT1G13220	Carubv10011605	CARHR013600	Thhalv10006601	1133	1487	1744	998	1255	783	1154	1208	1382	1141	936	885	1226	1615	1323	1133	1195	597	1071	1127	442	1133	1427	896	1006	1243	932	920	928	459	797	1161	1003	1047	982	766	895	1008	1323	789	1080	1285	609	674	914	599
AT1G13230	Carubv10009239	CARHR013610	Thhalv10009891	7	6	2	1	0	1	0	7	8	9	0	3	1	2	10	2	3	0	2	4	7	6	9	6	6	2	2	3	12	10	5	7	1	3	7	11	21	10	16	22	79	52	19	11	17	20
AT1G13250	Carubv10010952	CARHR013630	Thhalv10007975	381	276	529	145	436	286	324	315	494	233	453	306	315	293	262	193	240	200	172	107	124	138	265	122	104	59	180	108	220	103	134	48	134	118	224	140	233	420	492	339	365	303	265	149	377	251
AT1G13260	Carubv10009612	CARHR013640	Thhalv10010019	1308	3195	2327	2214	1230	1387	1066	1675	1539	1650	642	1202	1556	2603	1723	1976	865	757	1018	3436	1924	2233	1817	2852	1041	2606	1667	2636	1493	2805	925	2748	1049	2516	1177	2419	768	2155	1019	1584	1930	3781	824	1412	1233	1444
AT1G13270	Carubv10009496	CARHR013650	Thhalv10007980	488	499	3901	1841	966	600	630	569	3677	2000	447	679	760	533	3582	2644	783	521	1402	668	3372	2188	1389	859	1130	977	2508	2034	1164	743	1202	841	2877	2303	1169	983	2704	2662	3890	2441	1985	1523	2674	1768	3054	2254
AT1G13290	Carubv10012013	CARHR013670	Thhalv10009489	0	0	0	0	0	0	0	0	0	0	0	0	0	0	0	0	0	0	0	0	0	0	0	0	0	0	0	0	0	0	0	0	0	0	0	0	0	0	0	0	0	0	0	0	0	0
AT1G13300	Carubv10011925	CARHR013680	Thhalv10008054	725	925	757	1354	290	381	693	441	704	810	338	282	662	512	883	1428	286	146	165	143	439	3076	81	64	245	184	2119	3015	40	84	193	140	2317	2647	159	147	74	135	132	72	66	46	75	51	60	135
AT1G13310	Carubv10012068	CARHR013690	Thhalv10009351	9	18	10	15	23	9	0	6	0	4	12	11	7	4	1	6	8	5	9	107	38	73	22	141	36	278	7	123	17	74	14	96	19	91	14	85	28	70	52	63	45	47	14	30	57	83
AT1G13330	Carubv10011847	CARHR013710	Thhalv10008697	39	56	144	69	103	44	70	72	122	88	166	62	72	42	82	72	92	48	54	45	83	60	76	75	73	88	71	62	77	41	41	51	59	37	65	48	130	125	173	127	154	82	125	89	173	127
AT1G13340	Carubv10009293	CARHR013720	Thhalv10007815	159	715	300	1713	218	802	97	513	189	634	237	483	134	687	227	1092	189	419	37	702	240	76	94	195	129	1233	99	168	84	120	109	947	99	167	74	170	209	1388	253	362	711	1560	110	1664	225	357
AT1G13360	Carubv10010335	CARHR013740	Thhalv10008809	1332	2275	1479	2433	1637	2301	870	1324	1009	1354	680	1941	927	1567	881	2121	1304	1745	465	1165	2142	1363	984	665	570	1347	1990	1772	609	505	502	1318	1475	1504	824	671	1567	2279	1719	1518	3039	2974	1383	1523	1299	1670
AT1G13380	Carubv10010302	CARHR013750	Thhalv10008860	860	552	1041	478	893	614	711	553	949	612	545	594	771	605	733	571	707	561	1068	631	887	720	1083	810	933	684	1008	849	1096	491	1026	623	1029	962	1013	781	614	545	793	508	464	328	616	308	571	564
AT1G13390	Carubv10010468	CARHR013760	Thhalv10008925	937	1607	1451	1814	1033	983	901	1557	1276	1769	593	941	978	1336	1022	1271	599	843	421	1221	525	609	415	742	451	1244	488	720	333	439	402	863	569	732	343	534	493	1329	477	555	878	1098	381	700	343	613
AT1G13400	Carubv10010898	CARHR013770	Thhalv10009343	15	6	18	1	12	4	18	1	37	6	12	12	18	5	5	1	5	14	43	12	19	16	13	15	38	36	40	20	26	18	25	13	34	51	27	21	3	1	16	1	8	1	7	0	13	2
AT1G13410	Carubv10008584	CARHR013780	Thhalv10009406	67	66	253	130	99	76	44	69	181	102	41	81	48	94	209	156	116	37	215	187	266	138	306	191	193	184	183	164	186	134	185	170	196	143	187	155	103	128	105	65	121	58	65	66	111	51
AT1G13440	Carubv10009662	CARHR013790	Thhalv10008131	29277	24903	40201	19738	62235	43764	33124	25167	32568	23962	39783	40644	32310	28553	25280	23126	52472	40668	34934	19765	35735	38149	42267	37738	36655	21175	45024	37178	44148	37385	34078	18774	44163	37586	41401	36163	35336	25762	53360	43349	98483	77256	29375	15526	42729	33073
AT1G13450	Carubv10009313	CARHR013800	Thhalv10007959	961	1178	1157	1089	615	580	1039	892	1019	852	421	625	1112	957	1083	1133	629	467	980	525	466	789	589	463	940	561	1238	918	453	300	903	689	1307	906	595	486	445	525	598	673	338	423	489	298	514	682
AT1G13460	Carubv10008945	CARHR013810	Thhalv10007450	431	1015	694	948	719	890	413	526	500	641	473	767	521	721	590	771	716	509	785	751	641	741	963	873	891	904	743	818	793	596	858	763	908	788	820	762	695	1302	985	1004	1172	1842	619	845	796	762
AT1G13470	Carubv10009445	CARHR013820	Thhalv10009781	13	77	42	149	15	258	53	155	38	215	34	268	4	81	14	218	11	197	2139	12228	6303	1966	1736	3804	3715	12340	3279	1830	997	1411	1005	9495	2075	1553	1218	1945	0	0	0	0	0	0	0	0	0	0
AT1G13520	Carubv10011246	CARHR013840	Thhalv10007827	101	1322	62	643	78	649	26	476	49	344	51	434	54	627	28	543	57	300	0	49	1	5	2	181	1	170	0	36	3	101	0	25	0	12	0	26	91	5379	321	1847	315	2416	185	6126	290	2305
AT1G13560	Carubv10011704	CARHR013880	Thhalv10007875	1756	1984	3635	1862	2850	2005	1746	1483	2930	1848	1981	2011	1970	2063	2541	2062	2372	1513	1355	1188	1973	2190	2009	1296	1250	1580	2816	2091	1739	1151	1365	1430	3043	2176	1602	1306	2957	3232	5263	3605	2968	2591	2477	2299	4073	3301
AT1G13570	Carubv10009278	CARHR013890	Thhalv10007748	652	708	684	672	465	371	569	586	629	615	272	483	665	596	537	637	379	359	159	149	126	149	142	128	125	164	211	167	101	82	138	97	211	156	120	111	263	268	284	286	255	432	226	209	233	256
AT1G13580	Carubv10010947	CARHR013910	Thhalv10008348	265	381	387	469	350	437	218	224	287	302	355	353	334	341	315	370	310	230	241	735	366	256	233	369	230	957	228	259	248	284	249	664	213	258	241	277	641	1371	573	769	1016	1104	575	958	763	603
AT1G13590	Carubv10011693	CARHR013920	Thhalv10009205	209	234	455	386	397	254	355	238	318	676	326	277	284	240	283	381	233	202	11	36	18	7	28	18	27	53	3	19	17	9	24	31	5	21	10	17	721	851	485	1333	1959	1560	467	654	1176	1140
AT1G13600	Carubv10011839	CARHR013930	Thhalv10008825	26	44	37	13	69	43	6	9	30	20	42	61	60	37	14	18	89	41	64	46	40	15	68	47	78	40	9	8	46	50	68	30	11	21	92	44	49	53	24	27	63	66	32	23	13	19
AT1G13605	Carubv10011982	CARHR013940	Thhalv10009527	0	0	0	0	2	0	0	0	0	0	0	0	0	0	0	0	0	0	0	0	0	0	0	0	0	0	0	0	0	0	0	0	0	0	0	0	3	0	0	1	2	0	0	2	1	0
AT1G13610	Carubv10011195	CARHR013950	Thhalv10009744	15	11	16	1	24	28	23	0	8	5	16	14	23	8	7	2	16	13	22	42	39	8	22	40	32	51	24	12	30	29	26	32	15	15	35	13	3	3	1	1	1	0	0	1	0	1
AT1G13620	Carubv10010856	CARHR013980	Thhalv10023099	32	14	36	3	28	7	4	16	29	12	18	9	22	8	15	1	9	12	2	2	9	1	0	2	15	3	5	5	1	0	3	7	5	2	2	1	8	2	7	2	5	2	16	4	2	0
AT1G13630	Carubv10008310	CARHR013990	Thhalv10009738	101	200	221	141	148	125	87	43	103	35	63	98	108	155	216	159	137	58	86	102	78	172	228	195	182	164	166	139	114	94	154	110	226	161	119	118	127	132	112	71	108	138	94	65	126	52
AT1G13635	Carubv10009802	CARHR014010	Thhalv10008250	11	30	45	38	46	29	20	17	51	11	1	17	26	34	46	16	48	16	47	17	64	40	34	29	13	25	23	19	21	14	41	19	30	14	21	34	14	23	32	19	20	13	7	24	20	9
AT1G13640	Carubv10008594	CARHR014020	Thhalv10007082	2166	2356	3312	2744	1690	1722	1611	1184	2665	1803	745	1700	1939	1740	3502	2842	2253	1401	3303	1323	1717	3865	2853	2158	2070	1058	3225	2758	1723	1701	2769	1327	4100	2780	2300	2456	2398	1814	3507	1629	1870	1770	1583	786	2718	1678
AT1G13670	Carubv10010185	CARHR014070	Thhalv10009936	191	283	631	364	313	255	191	264	545	713	152	281	246	264	325	338	144	175	164	162	208	75	215	194	151	199	135	41	198	94	119	158	75	33	246	135	203	416	520	190	278	179	218	161	229	213
AT1G13690	Carubv10010435	CARHR014090	Thhalv10008898	835	647	1024	694	726	523	704	666	881	756	465	677	757	592	594	668	722	623	908	542	1121	778	1015	690	1071	730	969	934	943	698	955	715	859	835	794	905	844	726	823	695	594	592	767	404	608	780
AT1G13700	Carubv10010036	CARHR014100	Thhalv10008475	319	206	365	281	108	150	269	242	404	464	101	149	390	243	383	408	130	120	143	30	111	160	55	53	73	27	85	193	49	93	90	27	90	105	82	71	319	239	354	258	34	49	224	61	298	331
AT1G13710	Carubv10008872	CARHR014110	Thhalv10007373	246	114	217	90	255	119	92	117	251	152	118	241	187	151	48	28	62	225	100	43	16	48	69	39	69	45	53	17	42	36	33	20	53	80	20	26	87	61	86	31	95	64	29	22	8	25
AT1G13730	Carubv10011148	CARHR014120	Thhalv10007774	1072	623	1439	544	2614	1134	983	513	1122	589	1327	1431	1085	690	765	476	2051	1010	1827	1077	851	1053	2351	1578	1811	1449	1120	1025	2112	1359	1333	1117	1122	1022	1868	1354	985	758	772	444	832	472	618	451	618	385
AT1G13740	Carubv10009552	CARHR014140	Thhalv10008099	241	195	295	194	557	379	208	209	225	196	254	320	238	189	210	192	365	233	677	550	355	543	476	569	564	432	535	563	443	274	693	459	505	557	422	425	551	416	340	308	890	810	425	271	280	399
AT1G13750	Carubv10002971	CARHR014130	Thhalv10007099	131	259	271	376	208	434	181	217	272	310	152	399	148	232	162	345	166	221	1755	1242	1409	847	906	1118	1379	1084	1626	980	784	894	1116	1064	1266	780	885	970	153	356	173	256	311	323	137	195	175	191
AT1G13770	Carubv10009181	CARHR014160	Thhalv10007655	504	470	642	496	533	598	493	474	555	477	298	615	535	388	490	602	473	386	1236	1193	1003	1232	830	1352	1540	1309	1392	1633	936	841	1088	978	1344	1481	803	1076	466	460	382	467	411	504	359	283	304	378
AT1G13790	Carubv10008414	CARHR014180	Thhalv10006952	241	197	347	117	205	114	170	213	301	244	189	147	303	241	323	175	248	128	100	65	87	84	97	70	81	76	85	53	93	27	82	39	97	121	70	63	324	461	365	215	409	336	267	311	241	149
AT1G13800	Carubv10008293	CARHR014190	Thhalv10009810	44	60	102	43	62	52	11	13	66	6	2	49	45	54	87	74	95	36	241	41	117	224	242	137	232	65	161	199	129	111	150	73	267	242	182	159	446	452	399	173	336	368	352	261	294	140
AT1G13810	Carubv10009613	CARHR014200	Thhalv10008304	394	392	545	398	556	451	251	192	413	334	321	385	476	328	422	335	598	389	87	100	134	73	150	125	127	128	101	92	98	61	114	75	97	58	104	87	2	0	0	0	0	0	3	0	0	0
AT1G13820	Carubv10009998	CARHR014210	Thhalv10008133	1035	988	1323	674	1069	914	859	772	1127	605	738	909	1217	1001	1081	819	981	656	2542	1362	772	725	1961	1481	1624	1100	1066	801	1256	875	1703	1328	922	701	1959	1320	784	928	600	228	517	299	823	496	370	258
AT1G13830	Carubv10012551	CARHR014220	Thhalv10008701	66	119	128	155	228	539	65	76	94	112	101	210	50	68	101	126	173	234	73	42	108	175	177	507	182	36	117	267	184	582	92	19	80	160	151	366	648	888	367	832	1330	2284	355	467	624	821
AT1G13890	Carubv10012302	CARHR014260	Thhalv10008501	0	0	0	2	0	0	0	0	0	0	0	0	0	1	0	0	0	0	0	0	0	1	0	0	0	0	0	0	0	0	0	0	0	0	0	3	0	0	0	0	0	0	2	0	0	0
AT1G13900	Carubv10008535	CARHR014270	Thhalv10007019	445	868	722	700	472	625	391	485	549	408	274	555	557	818	632	818	698	401	640	853	437	670	670	572	687	874	718	547	506	462	661	746	715	523	699	648	765	1372	797	725	1018	1638	749	960	657	563
AT1G13910	Carubv10009699	CARHR014280	Thhalv10008166	237	124	264	185	275	207	244	111	185	206	225	194	234	113	133	140	213	149	195	177	92	161	188	211	224	214	230	218	136	107	202	173	252	196	194	144	153	115	91	87	111	99	142	55	57	58
AT1G13920	Carubv10010071	CARHR014290	Thhalv10009533	51	98	97	70	109	49	72	38	87	98	31	48	59	124	84	61	73	20	60	80	63	102	65	90	64	48	81	61	41	23	47	57	67	67	67	29	41	66	45	50	50	38	15	22	13	38
AT1G13930	Carubv10010521	CARHR014300	Thhalv10008975	5079	4252	31527	11694	7924	3989	8032	4384	30811	22705	7543	5543	4995	3618	16856	11460	4683	4343	990	571	24473	15052	3890	3886	1267	1157	23785	14532	3769	2670	1704	486	17102	11463	3430	3399	3463	3941	7602	4065	3847	2755	4508	1326	4212	4285
AT1G13940	Carubv10008191	CARHR014310	Thhalv10006678	510	801	736	712	459	649	343	312	540	303	268	618	557	819	892	844	789	440	689	357	392	730	535	290	472	411	561	592	305	282	532	356	693	585	524	341	382	458	618	543	609	762	388	270	427	384
AT1G13960	Carubv10008859	CARHR014330	Thhalv10007428	436	872	1033	1411	874	924	525	598	806	1032	486	807	560	729	927	1351	644	557	685	944	707	1463	660	1102	666	782	1173	1572	554	710	859	831	1396	1279	570	776	450	846	1276	1313	1117	1975	391	523	957	1057
AT1G13970	Carubv10008911	CARHR014340	Thhalv10007430	50	92	105	79	138	49	88	41	123	49	55	89	93	59	89	59	156	43	23	17	43	39	46	32	44	22	33	24	48	11	36	37	42	26	24	20	40	42	65	48	41	53	26	21	41	33
AT1G13980	Carubv10011818	CARHR014350	Thhalv10009607	1525	2032	1758	1592	1028	1008	1025	1232	1292	1101	680	1011	1562	2006	1657	1918	1519	832	1646	967	803	1649	1222	895	980	770	1227	1302	809	734	1208	922	1777	1232	1100	915	1322	1496	1572	1397	1417	1617	995	866	1095	1000
AT1G13990	Carubv10011044	CARHR014360	Thhalv10008453	546	1154	1308	2920	1307	1672	725	997	1040	2818	635	1179	601	807	1835	2915	955	1318	334	385	499	680	193	453	395	301	607	896	128	356	413	307	974	959	267	503	443	1088	1069	1302	617	1281	668	646	907	1222
AT1G14000	Carubv10009171	CARHR014370	Thhalv10007646	1017	3764	2226	3088	1954	2751	1163	1920	1692	2270	1201	2537	1302	2944	1860	3051	2301	1885	2193	3303	2524	3080	2191	2815	1860	3342	2602	2948	1612	2414	1881	2934	2455	2361	2031	2266	1541	3990	2436	2742	4791	8693	1544	3243	2119	2391
AT1G14010	Carubv10010285	CARHR014380	Thhalv10008684	772	1221	1101	1444	980	1190	961	1263	1098	1466	827	1154	970	1056	697	1229	789	957	2143	3883	3557	2508	1201	2256	3731	4374	2743	3470	2042	1658	2143	2790	2755	3045	1650	2262	677	2361	629	998	694	1326	614	1552	662	860
AT1G14020	Carubv10008919	CARHR014390	Thhalv10007443	511	765	728	654	706	600	321	497	633	413	458	689	593	725	553	534	644	438	490	704	321	421	462	426	448	769	456	457	479	382	494	600	418	404	503	396	560	687	372	284	664	658	405	497	348	248
AT1G14030	Carubv10011125	CARHR014400	Thhalv10007614	1125	628	1575	695	963	545	1199	644	1542	867	677	606	1288	619	1189	861	601	415	1056	423	567	896	659	263	436	394	910	668	443	242	696	403	1060	622	697	327	1054	569	1220	447	696	221	818	392	863	522
AT1G14040	Carubv10011174	CARHR014410	Thhalv10006818	186	2332	723	597	241	429	98	739	491	263	74	385	174	2473	634	605	376	189	410	16599	1579	1624	443	1334	512	22536	1215	1512	359	792	471	17751	1132	1893	404	855	233	561	385	284	354	263	218	403	289	263
AT1G14060	Carubv10011860	CARHR014450	Thhalv10008923	729	946	1506	900	1622	1058	724	743	1163	1018	1044	1017	771	890	810	622	1313	951	293	445	485	462	754	594	540	579	585	559	656	371	421	467	498	616	422	427	988	1170	816	496	1493	1117	676	809	739	372
AT1G14080	Carubv10011805	CARHR014460	Thhalv10009946	74	242	203	67	176	160	52	51	120	72	113	142	99	112	151	103	236	102	177	77	155	112	159	86	109	63	85	81	119	88	139	81	81	79	131	87	56	89	62	54	120	191	31	41	41	43
AT1G14110	Carubv10008907	CARHR014490	Thhalv10009405	0	0	0	0	0	0	0	0	0	0	0	0	0	0	0	0	0	0	0	0	0	0	0	0	0	0	0	0	0	0	0	0	0	0	0	0	0	0	0	0	0	0	1	0	0	0
AT1G14130	Carubv10009839	CARHR014520	Thhalv10008257	185	250	504	431	481	354	212	186	400	392	200	338	254	165	377	338	496	222	297	320	1006	523	373	463	424	311	560	593	445	271	360	288	534	566	289	362	185	182	158	299	361	576	110	120	178	344
AT1G14140	Carubv10009878	CARHR014530	Thhalv10008242	582	464	607	518	461	412	520	458	538	542	249	422	512	401	487	471	364	404	399	240	519	286	197	157	304	244	445	390	244	128	328	248	471	329	251	180	337	345	270	240	245	182	312	203	221	302
AT1G14150	Carubv10010358	CARHR014540	Thhalv10008853	1423	1035	1904	1130	1158	977	1483	859	1757	1481	1106	1082	1412	1040	1925	1682	855	800	2322	1131	1519	2391	2143	1620	1367	898	2443	2245	2044	934	1914	1036	3218	2351	3277	2006	949	939	1897	659	572	274	1108	550	1285	726
AT1G14160	Carubv10012228	CARHR014560	Thhalv10008800	44	69	98	118	129	165	73	45	57	95	96	139	54	33	76	111	154	104	39	21	81	73	59	89	74	24	54	65	63	72	81	29	59	78	69	77	39	27	47	35	53	174	19	7	18	41
AT1G14170	Carubv10009036	CARHR014570	Thhalv10006996	186	1066	1055	2133	329	1114	182	379	753	1191	190	749	268	669	602	1603	294	429	475	725	1580	1170	417	1025	626	774	905	1335	375	594	456	572	815	984	327	520	172	659	823	1493	624	1359	241	546	1031	941
AT1G14180	Carubv10009576	CARHR014580	Thhalv10008532	167	181	279	139	248	142	123	114	197	133	178	217	207	153	148	90	210	143	210	109	181	169	215	121	80	103	183	111	100	76	168	95	210	146	170	105	146	154	157	114	128	105	127	93	128	97
AT1G14200	Carubv10012348	CARHR014610	Thhalv10009557	694	1711	697	658	1130	1112	717	1332	480	678	491	848	654	820	281	316	762	1056	1316	1478	542	225	679	1185	821	969	329	279	574	818	709	1072	157	136	742	1147	611	942	312	383	338	500	495	415	235	320
AT1G14205	Carubv10010475	CARHR014620	Thhalv10008948	116	109	201	93	98	36	90	51	174	86	48	86	203	82	233	150	110	46	1586	465	1734	681	530	330	1050	469	1337	949	609	312	1058	573	1155	786	676	544	146	134	287	175	150	133	137	77	194	134
AT1G14210	Carubv10010110	CARHR014630	Thhalv10008594	860	1308	1570	1083	1357	1266	1015	856	1382	894	806	1243	1225	1007	1211	998	1261	929	864	888	1833	1683	871	1293	1538	1013	1786	2269	934	990	1051	809	1689	2072	731	1073	612	611	961	783	575	551	747	381	713	777
AT1G14230	Carubv10008956	CARHR014660	Thhalv10007159	430	633	816	735	561	670	308	378	531	547	345	583	539	488	673	712	594	401	262	161	190	202	151	177	215	213	227	316	143	143	241	177	213	192	194	194	622	1064	414	614	775	1428	347	688	435	438
AT1G14260	Carubv10012202	CARHR014680	Thhalv10008459	71	305	51	97	52	163	34	211	65	73	8	103	15	248	24	72	18	101	30	269	83	176	12	68	16	364	22	117	6	67	8	334	49	157	17	54	207	564	205	282	201	523	206	377	176	274
AT1G14270	Carubv10011314	CARHR014690	Thhalv10008130	1948	1215	1819	959	1617	1074	1656	1342	1804	1262	1041	1115	1726	1074	1384	1151	1119	887	1627	946	1237	1050	1211	875	1053	1092	1281	1037	1022	682	1198	977	1295	1050	1259	895	1350	1317	1692	827	929	644	1323	873	1154	975
AT1G14280	Carubv10009104	CARHR014700	Thhalv10009661	1329	1537	471	235	1550	1282	1285	915	357	209	892	1326	1793	1209	516	332	1923	1042	5479	1841	2253	1188	3500	2150	3131	1025	1381	1039	1925	1423	4897	1968	1357	758	3795	2187	1139	993	403	300	1582	1208	1243	427	322	205
AT1G14290	Carubv10010052	CARHR014710	Thhalv10008529	797	826	860	470	576	425	917	625	726	426	420	508	1000	786	678	514	488	261	1363	2835	2568	3108	544	676	1393	2959	4057	5889	621	492	1436	2890	3960	4480	893	654	335	546	390	740	435	413	362	397	423	640
AT1G14310	Carubv10010081	CARHR014730	Thhalv10008537	373	309	363	282	414	324	394	283	346	469	320	313	400	328	342	385	328	280	386	285	432	342	306	339	509	361	388	544	388	236	427	330	517	489	381	341	448	483	410	297	431	427	393	247	385	417
AT1G14340	Carubv10010131	CARHR014770	Thhalv10008608	228	208	479	328	296	361	292	120	370	284	236	289	254	176	394	472	285	263	605	855	900	739	623	1110	538	661	585	673	473	865	560	665	637	740	583	805	1115	1991	1925	2568	1690	3100	1083	1174	1879	2667
AT1G14345	Carubv10011943	CARHR014780	Thhalv10008846	2077	807	1951	791	3445	2066	2382	863	1970	1086	2647	2277	2426	1026	1514	1078	2680	2029	2528	985	696	1178	3182	2487	1735	902	1389	1308	3022	1709	2227	1036	1649	1155	3828	2379	1805	1577	2335	861	1774	718	1715	680	1434	878
AT1G14350	Carubv10011707	CARHR014790	Thhalv10007659	608	348	526	272	911	545	805	455	569	487	1148	539	578	360	347	231	452	314	213	210	178	100	269	170	190	198	180	153	219	120	225	148	176	188	228	137	497	354	518	316	544	277	455	209	447	402
AT1G14360	Carubv10011652	CARHR014800	Thhalv10008161	1096	2248	1032	1730	1270	1570	1039	1285	816	1447	752	1714	1016	1144	537	1364	1542	1735	1867	5003	1517	1223	1012	1177	2329	4079	1064	963	1192	1183	1284	2404	901	864	1147	1448	4420	6367	1310	2135	1288	2298	2959	3357	1285	1690
AT1G14370	Carubv10009175	CARHR014810	Thhalv10007701	238	2342	554	1397	425	1919	254	1555	459	1029	260	1584	200	2437	465	1298	521	1218	266	3037	518	688	375	1535	594	3678	527	928	448	1449	328	2894	499	1043	418	1129	562	2428	389	772	1339	4317	446	1826	423	627
AT1G14380	Carubv10008540	CARHR014820	Thhalv10007067	929	684	1063	541	766	569	926	547	998	727	704	758	921	609	726	676	907	527	1730	863	1013	1269	1294	1176	1465	795	1307	1257	987	964	1438	798	1497	1244	1401	1114	906	747	945	546	787	576	766	452	683	410
AT1G14390	Carubv10012614	CARHR014830	Thhalv10006929	60	48	82	36	73	55	39	24	72	14	47	75	51	52	84	43	99	51	45	18	41	80	41	35	43	12	41	39	23	19	24	7	66	60	34	22	98	142	79	70	96	107	62	62	102	49
AT1G14430	Carubv10011386	CARHR014870	Thhalv10007241	174	208	155	64	263	189	137	107	162	49	148	177	142	211	123	66	172	159	30	54	7	33	11	7	10	37	30	21	9	9	11	43	37	20	12	13	230	206	157	57	123	54	166	81	105	42
AT1G14440	Carubv10009782	CARHR014890	Thhalv10008236	397	220	514	176	406	169	258	266	499	177	187	289	466	291	246	186	251	250	368	211	363	263	244	139	230	151	361	199	211	102	255	159	414	252	275	186	353	183	365	192	248	122	320	99	228	163
AT1G14450	Carubv10010789	CARHR014900	Thhalv10009257	2000	1693	2776	2081	2528	2036	2627	2026	2505	2921	2075	1913	2165	1443	1412	1831	1567	2103	1667	1372	2588	1501	1486	1538	1449	1149	1631	1702	1749	1222	1455	1284	1802	1785	1645	1845	1598	1819	1718	1349	1463	1209	1722	1049	1363	1444
AT1G14460	Carubv10008136	CARHR014920	Thhalv10006609	436	662	611	346	517	407	286	262	392	249	228	483	516	686	498	409	675	297	289	110	141	250	343	170	162	122	200	191	229	166	180	95	270	178	269	163	639	546	603	513	748	640	468	358	440	322
AT1G14470	Carubv10008784	CARHR014930	Thhalv10009648	28	29	111	83	34	27	5	3	62	2	3	15	21	39	137	113	68	11	78	15	36	50	89	25	27	16	37	7	24	20	37	36	35	51	50	27	858	5232	872	1480	811	2251	914	3519	924	1354
AT1G14510	Carubv10010091	CARHR014960	Thhalv10008569	2397	3586	2789	2639	2529	2306	2107	2925	2490	2280	1233	2532	2835	3257	2274	2687	2341	2079	2247	1073	1907	1613	2410	1874	2256	1282	1955	1960	1952	1312	2049	1297	1972	1807	1841	1701	1441	1591	1224	1321	1862	2385	1306	1098	987	1219
AT1G14520	Carubv10009817	CARHR015000	Thhalv10009301	114	95	531	125	114	38	146	78	267	56	111	94	177	102	229	85	170	45	34	65	54	50	48	59	28	71	36	89	41	33	40	51	61	51	47	14	2	8	2	1	16	17	4	3	1	0
AT1G14540	Carubv10010887	CARHR015030	Thhalv10008244	70	7950	33	5027	21	3511	20	3384	32	1953	41	1216	70	7914	19	4554	17	1378	16	4907	42	2337	21	2686	48	7420	542	3901	19	3006	16	4370	336	3481	11	1488	41	11648	376	9526	582	11002	163	12176	1889	6321
AT1G14560	Carubv10009700	CARHR015060	Thhalv10008170	382	775	551	476	546	427	389	476	412	340	338	495	463	703	394	427	576	401	364	474	236	315	414	315	276	538	301	328	297	289	348	427	346	318	332	336	794	1280	676	609	1023	1109	666	847	506	549
AT1G14570	Carubv10009052	CARHR015070	Thhalv10007578	1266	1586	1871	1492	1451	1176	1040	1021	1337	1201	876	1290	1446	1514	1499	1754	1653	1076	1519	1264	972	1548	1302	1508	1454	1074	1398	1658	1234	1253	1415	1146	1700	1542	1359	1329	1527	1825	1772	1593	1812	2041	1318	1069	1309	1288
AT1G14580	Carubv10009023	CARHR015080	Thhalv10007538	514	604	674	359	559	452	409	386	430	170	305	422	673	670	442	511	580	440	1357	712	629	948	1267	984	740	593	972	789	937	771	1094	763	1215	838	994	959	1543	1556	1821	1619	1862	2431	1246	1026	1669	1414
AT1G14590	Carubv10009437	CARHR015090	Thhalv10004358	289	326	383	283	294	266	281	248	342	327	312	266	383	305	345	286	316	273	501	366	544	412	580	576	514	364	626	527	533	446	550	321	746	588	584	635	310	315	216	143	466	462	270	209	187	210
AT1G14600	Carubv10010057	CARHR015100	Thhalv10008620	159	144	173	153	398	275	216	131	160	102	222	201	214	133	113	98	220	196	295	407	396	546	351	609	306	325	578	935	365	373	302	348	594	819	363	544	175	159	177	134	200	156	131	98	130	209
AT1G14610	Carubv10011060	CARHR015110	Thhalv10006628	4123	4765	7013	4180	5716	4035	3385	2828	4785	3259	2652	4068	4496	5054	5651	5611	7118	2862	5900	2972	2217	4872	7930	4265	5042	4107	4091	3985	5108	3385	4949	4128	4634	4238	5637	3905	4938	4478	6523	5039	4775	3908	3577	2810	4403	3712
AT1G14620	Carubv10012651	CARHR015120	Thhalv10008660	947	662	1425	650	1336	743	1280	986	1203	992	1142	792	1216	686	804	641	1040	673	1187	790	1868	834	1316	887	1481	1135	1148	973	1237	631	1227	1071	1330	1113	1114	763	1095	905	945	622	771	523	868	567	792	620
AT1G14630	Carubv10010032	CARHR015130	Thhalv10008716	154	71	226	32	169	83	114	62	172	83	114	110	78	61	84	35	91	61	44	49	45	58	103	103	85	37	90	79	110	73	54	39	64	70	92	97	87	80	93	63	134	46	70	29	51	44
AT1G14650	Carubv10008350	CARHR015140	Thhalv10006856	2073	2424	2955	2356	2512	2073	2003	2309	2198	2640	1453	2242	2153	2536	2409	2540	2489	1810	2317	1805	1068	2441	2594	2119	1825	1616	2040	2098	2006	1544	2042	1663	2541	2253	2265	2062	2603	3161	3054	2604	3953	4698	1926	1592	2255	2029
AT1G14670	Carubv10008657	CARHR015170	Thhalv10007150	2376	4731	4197	3200	3267	2983	1851	2040	2949	1873	1878	3163	2375	4506	3179	3318	3892	2744	4045	3775	2841	3368	4237	3045	3699	3663	4009	3245	4859	3649	3863	3215	3542	2895	4715	3745	2061	3158	2512	2475	3154	3154	1688	2123	2342	1215
AT1G14680	Carubv10009927	CARHR015180	Thhalv10008342	26	65	112	72	42	24	24	47	80	59	16	43	44	49	86	45	37	23	30	34	23	24	23	22	26	19	29	16	28	21	21	24	31	31	13	30	22	13	13	4	12	9	7	4	13	4
AT1G14685	Carubv10009978	CARHR015190	Thhalv10008428	1829	1686	2396	1744	1099	932	1738	1674	2334	2562	892	1137	1733	1703	1691	1614	916	881	1320	1523	696	957	941	975	1272	1620	1125	1144	966	826	1166	1351	1029	1010	1056	936	1506	2055	1577	1287	1174	1303	1519	1408	1337	1331
AT1G14686	Carubv10011056	CARHR015200	Thhalv10008121	1	2	5	1	1	0	0	0	2	10	0	0	0	1	1	0	0	2	0	1	1	2	0	1	0	0	0	0	0	0	2	0	0	2	0	3	70	128	70	93	87	110	72	92	70	72
AT1G14687	Carubv10010471	CARHR015210	Thhalv10008930	27	26	67	36	74	29	18	38	59	39	62	52	26	33	45	41	32	49	50	22	79	36	65	82	41	15	51	21	73	22	27	26	27	68	34	58	42	47	51	17	37	34	32	14	36	19
AT1G14690	Carubv10012320	CARHR015220	Thhalv10007124	1192	820	1330	1201	1206	878	891	711	1194	1266	848	1052	1208	909	1253	1295	1250	707	919	541	791	913	1132	1020	604	536	583	788	687	676	630	542	651	686	949	835	678	654	929	903	797	863	561	301	690	654
AT1G14710	Carubv10008596	CARHR015240	Thhalv10007113	2348	2564	3444	1967	2929	2241	2652	2101	2690	1977	2054	2401	2777	2804	2318	2095	3321	2073	2052	1875	767	1599	2301	1966	2151	2164	1755	1652	2119	1592	2010	1633	1955	1745	2252	2060	1654	1919	1747	1609	2312	2012	1514	1030	1336	1197
AT1G14720	Carubv10009442	CARHR015250	Thhalv10008160	1011	1170	2567	1473	1311	980	1196	860	2336	1680	1163	1089	1273	1098	2001	1876	1096	953	89	69	105	262	104	154	73	84	226	253	164	123	74	49	211	410	58	160	129	141	360	109	162	77	127	114	191	127
AT1G14730	Carubv10010271	CARHR015260	Thhalv10008705	307	368	289	154	330	208	237	264	211	201	180	235	250	222	135	131	234	185	33	56	24	29	31	25	12	39	31	28	33	27	17	36	16	22	30	22	30	44	66	34	39	18	20	29	15	41
AT1G14740	Carubv10008407	CARHR015270	Thhalv10006891	2214	8166	3739	4481	2157	3990	1933	4324	2935	3601	1313	3434	2254	7329	3660	5216	2832	2758	1639	4227	2063	2830	1844	1992	1549	4162	2185	2354	1277	1475	1448	4380	2683	2837	1410	2054	2423	5081	3378	3814	4842	7766	1942	2993	2850	3241
AT1G14750	Carubv10010916	CARHR015280	Thhalv10009486	41	55	75	15	21	22	25	50	50	24	23	18	63	74	25	24	44	19	14	6	27	7	13	6	8	18	7	1	10	1	10	4	17	10	15	7	9	2	5	2	12	3	6	3	4	0
AT1G14755	Carubv10011088	CARHR015290	Thhalv10009754	0	0	0	0	0	0	0	0	0	0	0	0	0	0	0	0	0	0	0	0	0	0	0	0	0	0	0	0	0	0	0	0	0	0	0	0	0	0	0	0	0	0	0	0	0	1
AT1G14760	Carubv10011432	CARHR015300	Thhalv10009881	26	6	18	12	8	3	25	14	22	12	16	13	19	19	8	2	5	4	9	6	13	4	6	8	8	3	1	7	13	1	5	4	6	8	11	9	29	35	11	11	33	11	23	9	2	7
AT1G14770	Carubv10009280	CARHR015310	Thhalv10009755	334	208	268	192	256	153	280	155	287	200	226	220	376	214	225	205	240	144	217	100	142	91	137	82	164	105	92	98	97	101	186	105	126	113	123	103	1260	1639	1386	1189	1363	1830	1100	861	1098	1295
AT1G14780	Carubv10008542	CARHR015320	Thhalv10007298	117	450	196	341	232	531	96	133	140	192	113	324	187	310	149	466	237	257	195	997	174	319	187	378	365	1532	247	367	136	425	220	910	202	351	220	331	202	865	347	640	707	1408	187	577	346	534
AT1G14790	Carubv10008144	CARHR015330	Thhalv10006629	203	365	316	355	147	180	174	180	272	245	60	254	214	342	329	319	206	166	379	203	251	256	344	222	258	189	320	198	178	170	221	190	287	222	280	150	454	401	935	536	478	530	440	175	588	338
AT1G14800	Carubv10006759	CARHR101930	Thhalv10009766	2	0	0	0	2	0	0	0	0	0	0	0	0	0	0	0	0	1	0	0	0	0	1	0	0	0	0	0	0	0	0	0	0	2	0	0	0	0	0	0	0	0	0	0	0	0
AT1G14810	Carubv10009340	CARHR015340	Thhalv10007952	2548	3315	5414	2992	4777	2498	2592	2668	4628	3251	2565	2902	3309	3168	3675	3243	4493	2389	4521	3041	2198	2103	4031	2138	3660	3515	3091	1948	3605	1880	3362	3424	3094	2147	3766	2111	3415	3418	3986	1787	2866	1487	2860	2243	2927	1400
AT1G14820	Carubv10010095	CARHR015360	Thhalv10008567	427	336	845	563	772	797	426	366	854	737	500	700	495	369	575	522	561	561	623	1165	979	990	921	1331	763	1075	1115	1374	1098	1223	664	1014	1138	1219	764	1047	317	924	380	361	428	864	310	524	303	449
AT1G14830	Carubv10008553	CARHR015370	Thhalv10007102	1951	3457	2782	2346	2548	2053	2094	2033	2140	1964	1976	2196	2273	3115	2132	2513	3190	1696	2738	4057	3022	2604	2352	2343	3088	4525	2809	3015	2544	2214	2501	3388	2744	2418	2546	2435	2673	4195	2554	2148	3243	2957	2212	2483	2311	1552
AT1G14840	Carubv10008632	CARHR015380	Thhalv10007120	1046	724	848	375	1113	630	888	598	771	427	898	786	992	756	671	510	1197	576	2295	1044	1101	1683	3094	1576	1869	1046	1892	1572	1985	1046	1818	1027	2097	1508	2092	1390	932	621	935	566	882	629	817	357	710	523
AT1G14850	Carubv10012399	CARHR015390	Thhalv10006562	1151	1499	2088	1479	1488	1088	958	796	1337	1197	697	1108	1143	1522	1849	2007	1746	889	1184	790	738	1194	1790	914	944	925	931	824	1020	910	1011	823	959	779	1293	948	1853	1756	2235	1645	2669	2685	1246	1057	1482	1048
AT1G14860	Carubv10010439	CARHR015400	Thhalv10008895	417	473	588	705	253	232	428	391	514	857	221	232	489	329	580	951	329	177	573	734	959	975	391	539	632	898	927	1520	208	420	509	672	927	1316	475	576	792	1016	724	1497	1179	756	946	542	892	1452
AT1G14870	Carubv10010549	CARHR015410	Thhalv10009008	1960	15111	2807	13646	1881	8861	1280	8846	1835	10776	1379	5918	1029	8873	1766	9700	1265	5239	3512	69758	13737	14707	1508	12750	9166	70603	7872	18102	1327	6995	2762	54881	7869	15118	1948	8869	615	12260	1257	5142	3084	14009	670	9041	874	5569
AT1G14890	Carubv10010160	CARHR015430	Thhalv10008807	1066	1280	1109	1261	831	863	907	967	977	1314	362	860	934	1138	862	1690	735	860	491	1067	875	1067	791	1210	677	856	982	1170	945	959	604	581	591	1267	841	1231	1217	2634	813	1629	2971	3398	1358	950	487	968
AT1G14900	Carubv10010056	CARHR015440	Thhalv10008756	1714	1030	1647	856	1421	832	1345	885	1489	959	926	1146	1504	1121	836	1033	1119	1142	575	396	895	613	372	352	450	301	691	593	450	337	474	276	550	694	407	470	257	251	375	528	230	253	184	127	317	405
AT1G14910	Carubv10008396	CARHR015450	Thhalv10007171	900	1016	1340	1040	833	738	714	615	974	818	693	851	837	953	1064	1301	1087	846	1279	1474	658	1260	1083	1102	1042	1305	1141	1048	858	1059	1249	1182	1304	1000	1109	1228	1157	1784	1418	1231	1664	2729	960	927	941	802
AT1G14920	Carubv10008833	CARHR015460	Thhalv10007323	1341	1127	1233	705	887	670	1137	755	1027	670	636	773	1147	894	975	904	725	624	961	269	220	369	582	251	412	179	467	249	382	210	695	176	584	282	539	242	757	685	579	340	1639	1003	613	263	404	247
AT1G14980	Carubv10010732	CARHR015510	Thhalv10009183	6660	4693	7142	3712	9107	5038	6594	5015	6031	4394	5979	5626	6588	4091	3814	3156	7921	6753	5399	3753	3598	1650	4617	3614	6522	4413	3019	2319	5586	3232	5251	3608	2215	2249	5208	4966	4688	5264	3731	1939	2988	1688	4303	2914	3320	1614
AT1G14990	Carubv10010473	CARHR015530	Thhalv10009435	280	241	497	301	390	325	367	298	525	526	335	320	323	178	350	371	316	266	238	227	418	229	236	240	375	297	346	251	346	202	278	225	283	315	244	216	233	285	346	259	241	132	227	203	330	260
AT1G15000	Carubv10009146	CARHR015540	Thhalv10007602	556	317	800	361	525	308	343	210	620	273	266	369	483	322	416	329	351	338	1354	572	699	768	1505	1104	1016	415	943	649	1228	725	1173	477	1011	897	1758	1096	214	153	902	399	160	106	200	81	702	237
AT1G15010	Carubv10010520	CARHR015550	Thhalv10009026	48	203	127	494	43	23	105	157	152	267	70	38	101	164	108	422	34	46	56	62	58	30	19	23	65	51	31	25	24	23	39	63	11	8	45	64	7	35	33	18	40	104	10	27	15	14
AT1G15020	Carubv10008729	CARHR015560	Thhalv10007339	578	809	721	793	560	337	553	556	615	675	274	430	541	674	570	718	440	345	541	1052	399	568	392	603	534	888	489	526	406	506	496	790	577	547	433	551	730	918	842	916	554	602	615	426	655	952
AT1G15030	Carubv10009528	CARHR015570	Thhalv10008018	1225	2810	1382	1362	1110	1167	821	1439	1189	970	696	1462	1117	2247	1158	1393	1167	998	551	1616	323	542	870	828	484	1374	342	465	434	506	454	1541	347	432	927	705	391	706	458	498	630	615	342	381	381	462
AT1G15040	Carubv10011706	CARHR015580	Thhalv10009317	794	3637	990	3681	525	734	861	1607	904	2885	504	1100	949	2114	1022	3562	760	475	246	1120	669	475	285	216	375	1202	274	387	233	256	512	800	259	319	477	221	38	347	223	316	52	58	27	314	94	300
AT1G15060	Carubv10012334	CARHR015600	Thhalv10007211	605	863	659	661	612	724	619	654	456	645	283	813	616	872	572	731	657	588	573	253	268	455	489	306	171	213	298	293	262	268	382	237	424	243	457	299	595	1265	620	1004	1132	1596	555	692	617	756
AT1G15080	Carubv10009800	CARHR015610	Thhalv10008246	105	47	175	54	152	77	162	88	193	137	92	127	99	59	159	87	86	55	161	77	249	233	268	209	160	58	280	204	296	177	118	52	336	223	285	174	97	106	158	92	80	85	81	41	85	102
AT1G15100	Carubv10010511	CARHR015620	Thhalv10008995	505	471	702	418	1451	982	425	362	569	481	610	726	505	404	419	411	740	757	206	389	306	244	864	932	216	283	252	281	528	807	283	381	269	243	643	771	371	638	456	445	772	1090	277	374	352	401
AT1G15110	Carubv10011550	CARHR015630	Thhalv10007726	552	674	689	825	954	1032	467	629	562	998	524	786	485	570	460	551	647	646	367	565	237	491	447	617	386	548	405	667	414	389	352	420	417	425	496	439	890	1707	1033	1447	1616	2633	849	935	782	1511
AT1G15125	Carubv10009591	CARHR015660	Thhalv10008074	2197	4942	11115	15022	346	2060	2416	3800	10180	12845	361	3251	1517	3190	8335	12086	306	1790	373	990	490	656	901	3099	484	1076	493	885	1019	1426	832	514	653	879	708	2311	0	0	0	0	0	0	0	0	0	0
AT1G15130	Carubv10008299	CARHR015650	Thhalv10006787	1283	2644	2034	2540	1290	1632	1340	1386	1593	1649	960	1489	1224	2151	1854	3160	1682	1337	1460	2016	1028	1963	1592	1900	1360	1838	1482	1805	1026	1479	1310	1490	1711	1547	1317	1416	1592	2813	3150	3330	2577	4039	1325	1464	2328	2221
AT1G15140	Carubv10009891	CARHR015680	Thhalv10008333	1702	2113	3403	2394	2567	1692	1931	1952	3088	2262	1683	1678	1874	2025	2253	2053	1717	1593	4370	4331	1580	2282	2682	2436	3330	3959	3170	2682	2661	1783	3292	3527	3217	2794	3689	2550	2875	4205	3500	1921	2632	1847	2493	2349	2624	1538
AT1G15170	Carubv10008971	CARHR015690	Thhalv10007529	262	556	811	805	490	887	327	512	616	865	328	647	252	637	718	836	405	601	335	990	144	215	1038	993	305	947	190	279	809	763	333	826	264	296	919	927	197	293	319	244	191	224	219	197	226	254
AT1G15190	Carubv10010136	CARHR015700	Thhalv10009974	0	29	13	10	3	22	7	28	9	9	19	12	5	36	6	6	3	10	16	53	14	15	16	10	10	48	25	13	16	4	12	61	38	26	9	30	0	8	1	2	4	12	5	2	5	1
AT1G15200	Carubv10011586	CARHR015720	Thhalv10007720	4344	2376	4506	2682	4801	3069	4437	4026	3975	5324	4340	3304	4278	2286	2638	2388	3392	2397	2528	3002	1073	1965	2500	3234	4892	4605	2752	3617	3342	1589	2805	3253	2611	3467	2543	2747	1083	1103	987	630	1005	991	756	534	662	448
AT1G15210	Carubv10012050	CARHR015730	Thhalv10006563	791	946	1267	556	1428	949	599	342	819	286	504	951	802	702	1263	848	1942	612	566	1319	578	907	1344	551	738	2017	753	643	708	554	932	1157	746	687	907	485	52	39	72	17	107	31	43	46	42	16
AT1G15215	Carubv10010379	CARHR015740	Thhalv10008534	346	147	348	179	270	166	406	172	304	234	270	208	343	154	246	226	199	125	215	109	148	129	195	183	248	117	186	172	156	76	180	119	245	182	171	142	382	300	436	272	289	190	255	156	303	255
AT1G15220	Carubv10010517	CARHR015750	Thhalv10008971	244	226	327	240	211	146	223	193	306	232	79	184	261	191	277	229	149	119	325	282	371	338	298	276	327	267	429	408	363	246	314	264	450	459	321	288	204	279	217	217	222	236	199	107	177	191
AT1G15230	Carubv10011666	CARHR015760	Thhalv10008936	1058	618	1059	842	1046	832	1243	916	991	1246	734	699	982	592	665	681	617	717	359	316	461	364	466	473	446	303	505	528	356	233	289	307	460	459	321	411	346	519	285	224	522	711	355	287	252	210
AT1G15240	Carubv10008179	CARHR015770	Thhalv10006665	1426	1614	1558	1580	1150	1288	1128	1239	1224	1290	621	1198	1431	1464	1537	1703	1382	847	1503	999	472	1313	856	780	1121	1092	1284	1348	697	676	1258	960	1610	1266	965	871	1117	1207	1183	859	1075	1444	947	705	824	756
AT1G15260	Carubv10011308	CARHR015800	Thhalv10008881	710	437	780	258	987	666	987	427	809	364	839	561	760	395	533	291	633	484	280	104	225	152	434	235	186	70	292	151	262	179	278	99	200	130	284	180	893	547	1144	538	800	359	1166	249	1042	629
AT1G15280	Carubv10011034	CARHR015810	Thhalv10007225	1992	1934	2989	2250	2745	2317	1995	1520	2367	2614	1864	2127	1987	1897	2358	2319	2265	1482	1441	894	918	1768	2789	1570	895	970	1193	1103	1510	1423	1180	910	1456	1103	1891	1422	1042	767	1525	999	1470	1460	788	399	1158	667
AT1G15290	Carubv10011596	CARHR015820	Thhalv10006547	4270	2333	3915	2337	6366	5399	3359	1865	2992	2034	4122	5252	3681	2745	4096	4017	8023	3811	2891	715	616	2673	5287	2984	1338	621	1483	1670	2323	1950	1821	703	1873	1550	3935	2523	3069	1404	2664	2023	5062	2496	2069	750	1833	1538
AT1G15320	Carubv10011752	CARHR015850	Thhalv10008365	3	0	3	0	1	0	5	1	0	4	0	0	5	0	0	0	0	2	26	16	24	14	23	18	19	25	7	24	29	7	16	5	2	5	45	32	130	104	64	47	67	58	86	43	76	71
AT1G15330	Carubv10011907	CARHR015860	Thhalv10008048	113	70	11	37	8	4	30	42	24	53	7	1	39	36	17	38	1	2	12	13	24	8	8	19	10	17	16	11	7	7	10	16	10	23	13	13	26	36	6	12	5	3	10	13	3	21
AT1G15340	Carubv10009517	CARHR015870	Thhalv10007967	3760	3350	4518	3028	3480	2516	3444	2644	3651	3115	2089	2859	3523	3115	3519	3630	2985	2140	5668	3187	3756	4046	4925	3704	4670	3619	4473	3929	3322	2055	4429	3575	4476	4025	4460	3208	3496	4189	4281	3549	3415	3472	3935	2215	3211	3857
AT1G15350	Carubv10011587	CARHR015880	Thhalv10009002	1033	1195	1119	1619	1018	1205	1278	1364	1130	2242	782	997	995	819	883	1216	728	693	1296	1751	1124	1703	857	1110	1216	1548	1661	1795	791	1041	1279	1432	1840	1393	1055	1248	586	791	725	663	993	1360	422	523	577	775
AT1G15360	Carubv10010317	CARHR015890	Thhalv10008845	0	0	2	2	2	0	3	0	1	0	0	1	0	0	1	0	1	0	1	0	2	0	2	1	0	0	0	0	1	0	4	0	0	0	2	2	0	0	0	0	2	0	0	0	1	0
AT1G15370	Carubv10010572	CARHR015900	Thhalv10009024	1205	1376	1470	1596	1642	1584	1541	1308	1343	1927	1084	1631	1504	1212	1078	1443	1444	1563	1208	1146	1635	1105	904	1235	1612	1077	1390	1729	1241	904	1411	952	1405	1590	1133	1144	743	841	816	988	691	624	747	559	801	1089
AT1G15380	Carubv10010450	CARHR015910	Thhalv10008912	1626	2693	1051	2639	1240	1581	1161	1329	961	2415	886	1510	1227	1044	1056	2368	889	791	562	987	484	852	381	476	691	1058	608	940	366	323	636	687	660	895	519	384	732	1722	1829	2217	818	1239	628	1035	980	2824
AT1G15385	Carubv10012662	CARHR015920	Thhalv10009244	7	44	17	25	14	55	8	4	8	13	9	36	7	19	5	13	15	11	9	265	35	16	7	119	12	228	6	15	4	26	15	152	3	8	12	49	12	26	3	5	12	4	1	30	4	7
AT1G15390	Carubv10011124	CARHR015930	Thhalv10008467	1096	855	1457	739	1201	608	837	746	1285	724	592	683	1150	807	984	787	979	573	1048	572	798	455	757	499	831	666	656	546	765	360	852	722	775	659	885	625	871	774	761	340	510	247	902	581	630	365
AT1G15400	Carubv10010935	CARHR015940	Thhalv10009053	1113	1932	1597	1893	973	1027	1034	1468	1324	1871	723	963	1107	1407	1242	1645	804	1034	2250	2141	2943	2166	1778	2500	2229	1738	2442	2768	1560	1813	2072	1728	2542	2154	2226	2334	613	1401	977	1039	848	1455	600	979	792	1172
AT1G15410	Carubv10009705	CARHR015960	Thhalv10008186	1166	995	919	582	905	1073	1040	743	742	609	636	849	1031	828	715	526	1046	723	482	172	226	225	1375	1176	473	168	279	298	1218	629	638	177	382	278	1079	932	0	0	0	0	0	0	0	0	0	0
AT1G15415	Carubv10011465	CARHR015970	Thhalv10009177	72	224	308	999	427	650	105	195	186	925	286	495	70	181	144	351	255	389	10	388	212	90	31	222	16	298	72	94	16	31	52	287	116	171	18	156	70	137	73	150	97	233	23	100	58	220
AT1G15420	Carubv10009844	CARHR015980	Thhalv10008433	886	944	1759	966	2066	1260	827	828	1396	1216	974	1265	1091	955	1157	832	1731	845	655	596	948	704	1456	1008	1096	922	1114	903	1580	693	879	716	1192	998	982	718	1290	1405	1130	641	1642	1349	889	724	888	706
AT1G15430	Carubv10010051	CARHR015990	Thhalv10008539	182	1229	515	887	458	565	203	722	451	480	186	491	222	1528	418	649	443	485	290	1772	462	409	413	568	316	1649	427	431	435	390	365	1562	458	430	431	477	380	1785	419	517	836	1477	292	1335	310	477
AT1G15440	Carubv10008260	CARHR016000	Thhalv10006752	940	879	2286	1206	2403	1299	831	583	1544	1083	997	1381	1075	1038	1755	1460	2566	1269	830	489	613	959	2856	1492	1320	902	1079	797	1807	1123	1105	581	1117	1119	1249	1097	1494	998	1638	702	1893	1196	840	687	1191	432
AT1G15460	Carubv10011515	CARHR016010	Thhalv10007002	58	78	39	13	36	29	29	12	15	4	39	17	18	38	14	13	49	14	2	0	1	0	0	0	0	14	0	21	0	0	0	4	1	0	0	0	2	4	8	3	11	2	0	4	2	4
AT1G15470	Carubv10009691	CARHR016020	Thhalv10008159	447	527	803	502	752	568	565	415	649	463	537	540	461	424	475	537	744	483	479	450	245	468	403	399	587	601	476	553	546	365	488	413	577	544	455	418	772	713	785	666	762	759	583	447	781	531
AT1G15500	Carubv10008598	CARHR016060	Thhalv10007090	7230	7262	11822	7935	9980	6477	6298	5227	8954	5742	4972	6896	7265	7306	9400	9003	9217	5505	10164	4966	7223	12107	12139	7213	8969	6025	11276	9950	9030	6507	8986	5717	14227	10617	8734	7228	5242	19639	9048	10121	10690	27374	3707	17675	7809	9424
AT1G15510	Carubv10012185	CARHR016080	Thhalv10006770	279	234	761	349	383	471	93	83	508	140	162	372	353	290	819	702	898	292	400	88	254	433	824	378	306	149	389	368	450	245	365	120	515	448	423	384	441	488	657	278	555	651	304	286	506	234
AT1G15520	Carubv10008103	CARHR016070	Thhalv10006564	24	7607	465	6310	252	2888	47	3691	435	2414	276	2016	11	3832	319	1642	419	1245	167	10837	665	710	208	2827	276	10210	190	540	85	1239	395	8499	125	255	100	782	804	14336	2608	3455	4914	21769	401	12804	1158	2167
AT1G15530	Carubv10012446	CARHR016090	Thhalv10007025	436	2203	832	1194	257	710	323	1347	612	848	183	711	427	2403	727	1164	296	503	1172	10940	1685	2929	848	2415	874	7903	1883	2465	570	1941	1169	9442	1932	2255	784	1867	900	4293	1309	1729	1378	3330	807	2827	1049	1122
AT1G15540	Carubv10011635	CARHR016100	Thhalv10008198	0	3	2	31	4	4	0	18	1	15	0	3	0	3	0	6	0	8	3	119	4	11	6	37	18	150	6	15	5	27	15	70	4	11	2	27	3	3	4	0	7	5	2	1	3	2
AT1G15550	Carubv10009532	CARHR016110	Thhalv10008008	197	98	309	155	405	188	252	76	243	111	281	157	323	128	191	289	432	131	61	26	14	25	43	22	93	20	20	16	41	23	60	20	19	28	60	32	124	85	73	62	203	179	58	29	33	25
AT1G15570	Carubv10009125	CARHR016120	Thhalv10007623	543	308	537	170	424	124	601	372	518	310	443	322	557	374	283	182	252	206	536	324	172	216	306	184	329	332	368	228	306	184	402	323	483	276	308	200	575	424	430	312	336	152	390	243	335	227
AT1G15660	Carubv10008413	CARHR016160	Thhalv10006918	511	463	768	444	528	304	539	563	663	468	424	454	568	538	510	448	447	301	766	583	394	562	588	459	613	550	818	560	640	371	570	524	740	751	509	365	594	509	420	269	422	255	319	275	353	203
AT1G15670	Carubv10009534	CARHR016170	Thhalv10008027	1531	6502	3770	5833	818	1558	1286	3599	2269	4474	731	1373	1645	5141	2828	6081	944	1289	1416	2089	2014	3726	767	1228	1279	1068	1848	3207	688	1744	1716	1920	1435	2264	778	1466	2625	7107	1412	2112	1803	2171	1856	3294	1600	1288
AT1G15690	Carubv10008378	CARHR016180	Thhalv10006869	14849	16370	36535	24725	21717	15339	17307	12393	28622	26003	17988	15544	15083	16426	33134	38220	21267	12883	29711	17782	25804	40723	22045	12237	20412	17318	43339	34711	18284	13619	24800	18432	46249	27516	27098	15543	10079	8535	27557	12123	9711	6919	7438	4939	18016	8364
AT1G15700	Carubv10011380	CARHR016190	Thhalv10007892	231	257	302	199	224	225	254	215	202	201	163	244	264	198	191	194	265	230	230	176	238	225	245	192	261	165	249	296	208	196	267	201	244	258	207	214	386	291	262	167	238	187	301	162	179	187
AT1G15720	Carubv10011791	CARHR016220	Thhalv10022421	135	135	120	101	131	80	176	162	139	132	78	129	126	141	119	81	104	71	159	87	48	105	107	95	201	122	104	113	133	68	145	96	108	143	105	100	135	158	148	79	141	152	125	97	119	135
AT1G15730	Carubv10009134	CARHR016210	Thhalv10007622	1431	1305	1964	1038	1604	1024	1557	1209	1611	1255	1040	1182	1532	1475	1621	1436	1340	787	1169	608	684	875	1164	697	1144	821	1202	1073	949	476	987	663	1309	1014	1180	695	1821	1997	2179	1088	1081	740	1706	1361	1688	866
AT1G15740	Carubv10010899	CARHR016230	Thhalv10007169	1935	1976	1677	1966	1268	1627	1914	1394	1370	1809	771	1386	1886	1427	1949	2674	1228	921	1402	1385	1474	1729	801	1412	893	1133	1362	1674	451	1053	1229	1170	1632	1288	1040	1082	1326	1706	1453	1912	1527	2283	1533	896	997	1850
AT1G15750	Carubv10008139	CARHR016240	Thhalv10006622	4004	6474	6320	6066	5219	4194	3389	3295	4530	4294	2598	4388	3978	6129	6399	7347	6032	3676	2986	1688	1300	3814	3777	3985	2784	1629	2364	3042	2409	3168	2738	1504	2858	2931	2794	3285	2981	3685	3006	2390	3866	3880	2146	2075	2071	1620
AT1G15760	Carubv10012382	CARHR016260	Thhalv10009960	43	27	54	18	87	22	22	12	60	12	29	45	46	25	27	11	56	37	81	38	52	47	136	83	48	47	58	21	88	89	52	23	30	32	106	76	78	62	45	17	135	64	53	29	34	20
AT1G15780	Carubv10008096	CARHR016270	Thhalv10006572	986	1946	1645	1669	1145	1552	875	1070	1025	1153	461	1320	1153	1870	1404	2118	1533	1087	1343	1843	748	1632	1578	1455	959	1754	1204	1297	947	1019	1122	1820	1437	1302	1279	1356	713	1241	1213	1102	1538	2249	512	557	852	592
AT1G15800	Carubv10010293	CARHR016310	Thhalv10008783	243	416	412	461	239	368	166	411	501	665	125	237	159	519	357	348	150	249	154	1229	395	244	372	646	271	1270	344	276	320	260	232	1294	362	273	357	391	91	406	144	138	146	284	68	299	113	168
AT1G15810	Carubv10012290	CARHR016320	Thhalv10007635	874	784	2036	1062	1277	890	960	759	1486	1011	773	1200	1186	739	1269	1155	1345	841	962	518	743	1015	1457	865	927	683	1106	908	1264	821	872	712	1173	958	1090	935	3479	2626	1719	1239	2970	1668	2853	1191	1352	1027
AT1G15820	Carubv10010058	CARHR016330	Thhalv10008533	82271	64506	16087	5939	36606	29463	78802	52130	13051	6936	32532	37121	71642	61918	9112	7353	32594	35237	116768	62522	19385	9360	46575	30422	46187	33684	25491	11943	32633	25240	72376	43726	19430	11247	65224	36386	0	0	0	0	0	0	0	0	0	0
AT1G15860	Carubv10010104	CARHR016380	Thhalv10008656	941	1364	1311	1468	1470	1590	1048	1223	1107	1340	1074	1430	1210	1066	988	1302	1534	1206	1118	1126	1603	1470	1396	1703	1457	1436	1423	1730	1441	1148	1387	1359	1561	1726	1335	1331	1532	2090	1487	1673	2771	3248	1494	1413	1297	1715
AT1G15870	Carubv10012435	CARHR016390	Thhalv10008623	84	51	270	117	233	125	58	39	186	129	108	135	132	68	149	113	236	112	90	122	220	87	347	233	170	187	107	94	237	110	147	121	117	134	163	145	164	111	147	53	166	80	107	54	118	38
AT1G15880	Carubv10010239	CARHR016400	Thhalv10008707	1158	1589	1211	1434	773	920	1310	1673	1084	1616	650	899	1102	1258	1090	1178	696	700	1220	2165	1353	1145	499	836	1451	2086	1449	1416	615	542	1118	1829	1608	1363	725	799	1537	3206	1598	2150	1262	1831	1648	2059	1488	2482
AT1G15890	Carubv10012171	CARHR215210	Thhalv10028114	51	367	201	354	47	211	50	143	154	232	60	163	60	326	214	360	74	87	139	171	65	126	27	54	138	269	124	137	19	22	95	225	124	108	53	38	1052	1692	1399	1517	942	1056	1069	972	1012	1289
AT1G15900	Carubv10011590	CARHR016410	Thhalv10009838	25	29	35	37	13	18	29	51	38	51	19	17	23	40	25	20	13	15	14	11	50	31	13	13	15	24	32	31	6	9	20	11	38	42	15	15	77	234	60	92	85	116	67	170	69	63
AT1G15910	Carubv10008566	CARHR016420	Thhalv10007054	890	718	1049	601	707	340	677	650	835	692	405	607	873	806	830	636	627	360	2456	1636	864	1528	2053	1415	2345	1901	2163	1865	1967	1066	1946	1623	2328	2170	2030	1400	1923	1826	2412	1827	2014	1792	1552	998	1712	1679
AT1G15920	Carubv10009915	CARHR016430	Thhalv10008404	914	955	899	1039	883	669	1050	1028	839	1031	620	787	994	862	891	705	688	571	416	508	460	451	446	459	527	507	575	502	429	381	456	475	723	556	446	475	1084	1743	988	921	1140	1457	1075	1003	713	1031
AT1G15940	Carubv10008168	CARHR016450	Thhalv10006733	1420	1268	1543	1198	1897	1221	911	1165	1288	1399	1521	1392	1280	1337	1270	1419	1677	937	1527	833	604	1458	2859	1890	1686	904	1490	1453	1898	910	1284	769	1660	1559	1699	1418	683	853	879	715	1008	1159	577	482	671	655
AT1G15950	Carubv10009629	CARHR016460	Thhalv10008111	2723	4405	2636	2439	8520	7310	2507	2440	1941	1892	4046	6524	2908	3792	1727	2324	6784	5887	883	870	600	645	1763	1510	822	954	606	519	1609	1261	860	748	479	546	1706	1197	1532	3858	1940	2933	2987	5460	1458	2127	1638	2036
AT1G15970	Carubv10009599	CARHR016470	Thhalv10008041	400	427	529	304	499	423	467	301	434	374	293	399	405	383	379	322	470	309	833	678	711	642	453	410	638	558	811	732	571	345	585	465	776	578	668	542	129	130	355	295	150	127	104	60	276	209
AT1G15980	Carubv10009072	CARHR016480	Thhalv10007586	2797	3507	3324	1576	2126	1848	2290	2073	3000	1251	1641	2272	3779	3714	4140	2445	2608	1615	6017	3104	2767	4301	4236	2535	2993	2276	5169	4054	3125	1825	4551	2945	6437	3998	5951	3239	2004	1775	3694	2000	1423	874	2363	1207	2720	2012
AT1G15990	Carubv10008459	CARHR016490	Thhalv10009463	0	0	0	1	0	0	0	0	1	0	4	0	0	1	0	0	0	0	0	7	0	1	4	2	0	0	1	1	6	1	1	0	2	0	1	6	0	0	0	0	0	0	0	1	0	1
AT1G16010	Carubv10010853	CARHR016500	Thhalv10007638	1094	1871	1614	1681	1666	1752	781	1196	1265	1064	852	1855	1237	1699	1489	1676	1837	1336	1273	890	749	1326	1427	1547	1171	744	1240	1266	1153	1196	1311	955	1440	1378	1298	1378	982	924	908	838	1446	1693	748	541	778	803
AT1G16020	Carubv10012180	CARHR016520	Thhalv10007433	523	438	764	502	715	505	554	450	634	490	451	556	567	440	552	548	653	391	350	119	132	256	527	412	268	147	256	283	362	256	289	129	308	233	342	287	497	436	604	420	501	313	405	263	532	375
AT1G16022	Carubv10010659	CARHR016530	Thhalv10009837	34	23	46	23	42	10	24	20	27	9	29	20	27	16	30	10	25	8	36	28	42	34	28	7	10	25	26	22	11	7	16	16	21	16	16	12	11	19	18	18	5	5	11	6	3	8
AT1G16030	Carubv10012149	CARHR016540	Thhalv10007031	307	394	318	559	855	313	162	182	177	183	305	455	313	385	531	509	2359	463	1143	1059	267	368	729	872	687	622	302	371	764	1011	1539	999	435	325	3244	3649	1097	1256	313	210	2261	12138	492	451	213	180
AT1G16040	Carubv10010172	CARHR016550	Thhalv10008658	428	312	499	464	454	443	514	442	424	545	465	406	536	300	368	410	470	321	333	200	403	326	313	332	448	292	398	483	392	206	445	259	411	490	422	379	359	399	344	341	404	777	326	198	335	395
AT1G16060	Carubv10010918	CARHR016570	Thhalv10008118	161	127	165	106	271	137	213	106	166	115	161	192	120	109	86	73	171	140	63	64	74	77	101	76	87	66	110	76	108	89	80	64	97	79	80	64	81	102	89	57	76	51	75	49	63	40
AT1G16070	Carubv10009355	CARHR016580	Thhalv10007810	86	43	139	22	90	18	38	59	157	39	69	72	81	83	61	12	65	34	52	31	68	50	57	46	56	32	67	41	52	42	38	23	55	75	34	32	53	20	54	19	23	5	31	14	39	32
AT1G16080	Carubv10009813	CARHR016590	Thhalv10008259	2310	2388	2941	1533	1945	1748	1804	1731	2662	1504	1389	1831	2567	2527	3003	2095	2174	1588	5899	3488	4909	3361	5043	3534	3773	3034	4430	3985	4461	2530	4732	3411	5947	4418	6105	4366	1233	1375	1958	641	1328	1039	1296	775	1160	682
AT1G16180	Carubv10009295	CARHR016660	Thhalv10007762	2181	5539	4057	4730	3692	5306	2533	2763	3076	3690	1607	3913	2590	4014	3473	5614	3852	3697	2989	5953	3795	4778	3401	5648	4278	6771	3732	5117	3097	3924	3246	5425	3950	4913	3517	4327	2201	4442	3560	4377	4079	7358	2280	2813	2835	3533
AT1G16190	Carubv10011879	CARHR016670	Thhalv10007982	687	700	1172	495	1130	650	789	501	838	428	651	813	723	719	651	472	887	560	974	942	522	703	1059	923	967	1052	906	828	1109	735	871	828	976	777	1037	829	330	411	330	231	340	200	228	187	279	168
AT1G16220	Carubv10011374	CARHR016690	Thhalv10007474	176	166	306	123	194	138	134	180	256	163	102	205	208	172	164	127	130	87	13	16	8	15	24	32	16	16	13	19	22	18	21	21	9	14	26	25	74	86	80	64	100	71	66	61	51	73
AT1G16240	Carubv10010186	CARHR016710	Thhalv10008662	1658	2538	1857	2100	1446	1779	1820	2039	1737	2274	1169	1605	1872	2067	1807	2044	1329	1291	976	790	1207	798	581	675	870	887	981	1032	533	490	856	773	1179	957	702	596	1241	1721	1459	1499	1615	1993	1267	1058	1332	1649
AT1G16250	Carubv10009433	CARHR016720	Thhalv10007905	256	365	458	375	224	261	224	208	309	337	117	288	329	309	462	483	255	144	520	515	445	561	326	367	380	449	546	566	269	321	435	448	606	521	319	403	157	149	172	153	200	207	105	92	127	103
AT1G16260	Carubv10011235	CARHR016730	Thhalv10006974	436	998	498	727	388	1156	380	595	490	679	468	1011	521	929	419	979	493	684	521	536	742	618	371	359	254	364	639	370	169	287	222	569	672	435	436	383	1	70	3	96	15	135	1	41	5	39
AT1G16270	Carubv10008134	CARHR016740	Thhalv10006624	889	1517	1355	960	1320	1188	806	769	1024	744	735	1216	1003	1526	1213	1304	1657	886	1811	1297	798	1758	2277	1571	1201	1225	1355	1363	1448	1449	1428	1153	1483	1346	1886	1536	2299	2618	2752	1885	2576	2390	1617	1594	1811	1274
AT1G16280	Carubv10012273	CARHR016750	Thhalv10007467	274	348	615	324	731	361	179	206	418	224	276	473	436	313	442	341	898	405	473	334	484	460	740	552	618	415	520	483	772	396	527	353	656	537	557	464	974	980	831	501	1102	865	633	618	636	411
AT1G16290	Carubv10009260	CARHR016760	Thhalv10007775	6	2	0	0	1	1	0	0	2	0	0	1	0	3	0	0	0	0	133	333	68	76	152	187	180	266	80	83	108	80	161	265	101	96	159	161	1	1	0	2	2	3	2	3	0	1
AT1G16310	Carubv10009337	CARHR016780	Thhalv10009396	19	46	184	90	185	135	34	17	134	95	114	113	30	48	85	111	126	89	87	49	54	69	561	480	114	65	66	88	348	261	108	54	47	52	276	214	102	89	271	287	608	614	95	63	132	177
AT1G16320	Carubv10009990	CARHR016790	Thhalv10008440	1007	820	1616	1424	2242	2237	948	612	1486	1184	1247	1921	1197	795	1793	1838	2414	1523	3936	1777	2875	2373	4955	4154	2674	1580	2441	2201	3472	3040	3776	1914	3187	2224	5038	3804	1590	1752	2404	2146	3101	3168	1749	901	2007	2122
AT1G16330	Carubv10012501	CARHR016800	Thhalv10007052	66	97	170	39	99	37	73	46	135	45	47	63	111	84	72	40	72	40	116	42	52	52	90	45	28	64	76	40	86	37	50	29	69	23	58	32	152	171	109	53	150	122	63	133	84	31
AT1G16340	Carubv10012219	CARHR016810	Thhalv10008359	479	308	638	288	503	283	418	331	545	290	356	418	486	328	481	334	374	282	859	648	594	479	595	401	837	608	764	552	659	322	788	538	784	638	697	394	195	152	225	115	105	74	136	63	153	103
AT1G16350	Carubv10008910	CARHR016820	Thhalv10007432	2490	2195	3908	1599	3559	2325	2004	1476	2894	1506	1826	2789	2782	2001	2699	2306	4391	2440	2406	1347	1099	1566	3902	2350	3577	2099	2280	1870	3212	1605	2341	1498	2241	2240	2713	2007	3027	2665	3045	1812	2920	1756	2243	1574	2536	1274
AT1G16370	Carubv10011578	CARHR016850	Thhalv10007384	160	366	238	146	219	195	137	113	195	116	77	191	200	226	162	194	238	112	2	0	0	0	0	0	1	7	0	5	0	0	1	0	0	0	0	0	74	162	237	73	81	34	85	112	142	75
AT1G16380	Carubv10011761	CARHR016840	Thhalv10010021	0	0	1	0	0	0	0	0	0	1	0	0	0	0	0	0	0	1	0	0	0	0	0	0	0	0	0	0	0	0	0	0	0	0	0	0	3	5	3	0	1	0	3	0	0	1
AT1G16390	Carubv10011593	CARHR016860	Thhalv10007377	711	685	881	416	467	557	640	515	777	403	546	746	516	366	657	382	669	542	143	229	374	278	48	76	227	218	299	299	48	28	218	231	209	256	71	62	101	93	131	75	69	18	138	42	99	67
AT1G16410	Carubv10010983	CARHR016870	Thhalv10007301	413	304	1767	261	1025	531	807	191	1219	103	1034	747	365	168	682	246	638	625	1	0	1	2	0	2	1	11	2	11	1	0	0	1	0	0	2	1	522	284	999	339	1140	300	613	137	523	120
AT1G16420	Carubv10011040	CARHR016890	Thhalv10007917	23	1368	48	296	138	983	15	1145	48	169	97	768	27	1722	30	195	96	444	0	2	4	0	2	6	0	11	2	4	5	3	2	3	2	2	0	0	0	9	7	10	8	4	0	1	4	4
AT1G16440	Carubv10011491	CARHR016910	Thhalv10007415	14	24	47	4	36	12	16	14	32	4	52	20	34	35	38	16	56	8	2	1	10	2	5	1	10	0	3	4	5	1	6	1	3	1	3	0	8	23	5	3	3	5	0	7	5	9
AT1G16470	Carubv10010173	CARHR016940	Thhalv10008648	1863	2102	2938	3163	2613	2941	2003	1911	2553	3354	1602	2724	2244	1894	2089	3610	2666	2328	3115	2271	3841	3942	2437	2687	3808	2878	3841	5445	2777	1959	2936	2311	3359	4024	2560	2379	4186	4663	5234	8002	4362	5329	3860	3143	5136	7197
AT1G16480	Carubv10011798	CARHR016950	Thhalv10006722	78	215	224	134	86	79	40	77	157	62	77	92	111	193	175	157	130	76	213	211	121	218	273	174	202	268	228	202	192	104	194	260	266	218	214	183	229	211	304	161	205	218	169	126	197	125
AT1G16490	Carubv10011190	CARHR016960	Thhalv10008436	8	13	9	4	23	2	14	9	12	5	7	9	10	12	7	2	16	8	18	89	40	73	67	104	85	125	62	130	39	53	69	78	68	152	49	120	106	179	149	225	220	263	64	99	150	190
AT1G16510	Carubv10011035	CARHR016980	Thhalv10009033	82	75	152	62	264	220	95	125	117	100	99	158	63	74	95	42	149	151	42	72	103	77	93	128	54	88	141	87	95	138	41	97	126	79	69	95	47	244	131	57	167	219	74	133	113	58
AT1G16520	Carubv10009722	CARHR017000	Thhalv10008187	609	412	776	291	681	262	469	429	706	403	388	407	492	443	367	254	470	351	347	228	288	276	343	254	257	272	447	234	345	184	270	185	390	266	289	213	383	428	446	305	254	221	258	270	319	298
AT1G16530	Carubv10010749	CARHR017010	Thhalv10009386	40	27	50	1	147	43	34	28	26	2	92	36	43	26	24	6	85	30	2	10	14	15	12	8	5	8	9	6	8	11	12	9	16	18	9	17	21	18	7	12	71	31	11	8	7	6
AT1G16540	Carubv10011147	CARHR017020	Thhalv10006808	465	903	789	1140	721	702	522	648	573	729	365	642	487	599	590	815	525	483	476	261	191	478	403	356	471	320	346	508	269	241	458	257	485	439	304	343	384	797	436	500	546	884	275	450	350	481
AT1G16560	Carubv10009543	CARHR017040	Thhalv10008113	1240	1408	1713	1497	1349	1280	1517	1068	1476	1452	1016	1371	1321	1246	1252	1512	1096	991	1287	1248	2137	1873	1078	1420	1848	1399	1908	2269	1371	1141	1508	988	1745	2037	1177	1336	1617	2221	1974	2459	2114	2309	1516	1259	1676	2237
AT1G16570	Carubv10008948	CARHR017050	Thhalv10007520	631	592	737	598	535	556	548	537	643	583	385	409	693	556	556	643	486	402	616	499	476	608	524	516	684	484	664	806	460	428	590	398	824	729	484	540	592	627	623	559	484	548	533	311	494	536
AT1G16590	Carubv10010297	CARHR017060	Thhalv10008810	73	53	111	79	94	81	87	83	119	57	66	94	143	70	86	93	68	60	88	75	25	76	61	86	76	68	72	88	49	51	81	55	97	74	66	66	60	76	57	58	54	69	58	34	59	75
AT1G16610	Carubv10009275	CARHR017080	Thhalv10007778	2277	1668	2875	1712	3128	1757	2993	2044	2456	3251	3534	2081	2132	1716	1458	1675	2037	1925	1515	1260	876	1442	1658	1687	1884	1491	1579	1680	1933	1401	1402	1115	1668	1553	1859	1530	2353	2457	2313	1682	2601	1845	1672	1177	1750	1267
AT1G16630	Carubv10008298	CARHR017100	Thhalv10006806	273	205	446	132	270	67	202	149	430	112	135	156	254	183	209	67	128	92	216	87	66	49	135	55	107	90	151	73	103	37	83	43	103	78	109	63	204	106	224	74	95	40	139	55	134	56
AT1G16640	Carubv10012547	CARHR017110	Thhalv10009082	56	202	116	64	80	94	56	152	125	101	62	115	50	170	44	33	62	57	14	25	33	12	41	23	22	18	12	12	40	18	8	22	10	10	16	19	0	1	2	1	1	0	1	2	0	0
AT1G16650	Carubv10009211	CARHR017120	Thhalv10007372	468	507	669	520	531	371	386	413	458	523	316	365	528	423	536	498	399	295	247	191	146	213	296	183	251	214	267	213	208	122	202	164	240	206	180	189	569	565	401	323	446	367	440	329	375	315
AT1G16670	Carubv10012041	CARHR017130	Thhalv10007825	317	2072	540	1214	416	1364	253	1159	442	728	346	1045	384	1940	413	929	396	712	627	2774	1513	1057	811	1635	688	3031	978	1128	615	1204	623	3360	905	915	639	1290	406	2378	957	1123	794	2434	494	2308	689	1009
AT1G16680	Carubv10008751	CARHR017140	Thhalv10007268	850	522	903	688	966	678	705	462	757	662	525	700	997	430	704	608	790	495	861	345	215	606	801	568	695	388	535	497	711	361	750	309	742	579	828	496	405	360	427	354	395	411	339	200	303	312
AT1G16690	Carubv10009354	CARHR017150	Thhalv10007658	236	172	311	240	311	202	311	188	291	216	254	243	240	216	243	232	196	147	363	199	123	252	408	401	292	155	327	278	433	251	337	158	327	282	434	346	300	316	452	668	676	656	256	179	453	518
AT1G16700	Carubv10010241	CARHR017160	Thhalv10008714	1417	1721	2541	2176	1837	1755	1966	1999	2136	2638	1615	1681	1688	1449	1528	2164	1410	1437	2100	2338	3070	2381	1959	2340	3242	2686	2841	3167	2725	1742	2325	2066	2299	2886	2205	2160	1284	1539	1748	1514	1367	1085	1283	967	1480	1468
AT1G16710	Carubv10008082	CARHR017170	Thhalv10006544	956	1811	1329	1472	1219	1467	722	686	935	916	711	1202	894	1617	1459	1661	1431	787	1601	1031	407	1321	1778	1351	1088	1003	864	971	934	853	1120	970	1025	996	1370	1111	1005	1248	1257	1057	1569	2333	564	719	829	788
AT1G16720	Carubv10008646	CARHR017180	Thhalv10007626	3142	3326	3291	2608	5144	5614	2888	2156	2698	2009	2758	5011	3787	3842	4056	4810	4931	3537	8321	4263	1476	3798	9545	6560	3967	3258	2637	2832	4143	5087	5721	4196	3189	2274	9835	5725	4173	5150	4214	2417	4513	3109	4254	2523	2512	2174
AT1G16730	Carubv10012617	CARHR017190	Thhalv10008754	167	163	63	46	561	245	148	123	48	30	234	280	159	133	47	38	476	332	82	18	19	13	626	200	60	18	4	10	475	103	51	15	4	11	316	222	9	14	11	5	32	16	18	19	8	13
AT1G16740	Carubv10010647	CARHR017200	Thhalv10009114	1028	803	1588	968	1645	960	1175	865	1272	1122	1046	1039	1183	788	944	882	1193	937	1141	553	1088	611	1291	997	1790	909	1224	1093	1769	866	1186	717	939	1026	1248	1116	873	904	1032	791	850	668	836	582	843	842
AT1G16750	Carubv10008799	CARHR017210	Thhalv10007325	333	290	364	239	336	332	401	251	322	243	281	253	356	310	305	214	320	246	421	359	139	216	460	455	345	257	251	248	394	305	388	269	340	245	477	393	453	330	450	303	468	343	477	172	457	340
AT1G16760	Carubv10010903	CARHR017220	Thhalv10009494	0	0	0	0	1	0	0	0	0	0	0	0	0	0	0	0	0	0	1	0	0	0	2	0	0	0	0	0	0	0	0	0	0	0	0	0	1	7	4	3	5	10	5	0	2	1
AT1G16770	Carubv10011789	CARHR017230	Thhalv10009697	8	10	10	5	7	3	5	5	3	2	0	2	11	2	2	8	5	8	0	0	0	0	1	2	2	0	0	0	0	0	3	0	1	0	1	1	1	1	0	1	3	3	1	2	0	1
AT1G16790	Carubv10011947	CARHR017250	Thhalv10009015	349	260	413	235	326	227	368	220	445	311	197	216	294	255	229	274	284	226	219	57	221	139	274	143	190	96	149	159	307	165	187	63	224	130	235	180	349	297	309	202	222	153	323	171	250	187
AT1G16800	Carubv10008065	CARHR017260	Thhalv10006526	262	380	485	338	369	327	89	153	259	153	182	348	233	327	425	362	578	179	468	213	123	314	569	302	306	180	200	195	283	229	254	178	233	189	383	232	549	573	681	477	842	862	314	326	439	307
AT1G16810	Carubv10012679	CARHR017280	Thhalv10009062	2373	1779	2653	1973	2532	1965	2531	2209	2219	3447	2080	2070	2395	1546	1762	1734	1840	1628	2023	2120	2297	1699	2029	2398	3155	2429	2379	2595	2499	1069	2348	2215	2682	2802	2011	2068	1603	1845	1881	1527	1784	1933	1728	1338	1679	2019
AT1G16830	Carubv10008619	CARHR017300	Thhalv10007086	76	81	159	83	187	123	43	47	140	47	100	141	117	64	122	77	225	90	180	103	222	186	374	163	242	127	199	142	257	118	243	119	207	197	202	172	141	104	149	82	160	125	95	61	109	67
AT1G16840	Carubv10010301	CARHR017310	Thhalv10008939	1051	1371	1616	1568	640	783	1047	1019	1157	1369	445	727	965	1124	1096	1603	603	758	781	1446	1083	1720	339	732	910	1365	1996	2449	484	588	804	1179	1881	2200	553	781	598	1006	2115	2793	557	765	635	638	1788	2366
AT1G16850	Carubv10010543	CARHR017320	Thhalv10008985	44	15	91	32	95	27	27	23	62	21	50	49	56	33	35	25	162	32	31	30	294	227	117	97	44	27	238	284	124	73	81	17	224	298	110	134	14	7	641	483	418	326	7	5	456	501
AT1G16860	Carubv10009033	CARHR017330	Thhalv10007531	0	0	0	0	0	0	0	0	0	0	0	0	0	0	0	0	0	0	1081	540	720	860	1006	650	1055	593	1087	1041	805	523	1099	557	1044	936	928	725	792	865	1044	893	959	995	642	464	846	747
AT1G16870	Carubv10009019	CARHR017340	Thhalv10007506	1064	1054	1949	1107	1301	903	1002	824	1423	1070	632	1026	1240	1217	1244	1237	1493	882	996	546	750	982	1192	903	1290	927	1153	994	1344	780	1032	717	1301	1054	1070	860	820	657	855	516	864	708	573	501	652	405
AT1G16880	Carubv10009908	CARHR017350	Thhalv10008354	7020	6540	13780	8378	6802	6143	7384	5832	13667	7712	5253	7502	9197	6903	15590	11574	6556	4993	14620	9018	15841	12747	9706	6898	10460	8173	15002	13431	8809	5920	12631	9198	17668	13613	15634	9301	8675	9954	16201	7647	8031	6800	8967	5785	11082	8490
AT1G16900	Carubv10008626	CARHR017370	Thhalv10007218	591	480	871	992	731	673	614	547	773	797	619	737	629	442	570	1047	736	584	395	566	451	486	534	559	698	678	569	569	666	454	552	445	651	593	507	535	763	555	816	676	987	1063	524	368	670	521
AT1G16916	Carubv10010818	CARHR017420	Thhalv10009282	502	305	498	408	518	308	677	553	536	763	328	322	479	236	365	347	264	272	498	390	941	599	465	633	775	377	855	939	627	327	509	371	833	860	377	536	432	381	405	265	359	242	399	219	355	318
AT1G16920	Carubv10010133	CARHR017430	Thhalv10008752	1485	1082	1114	516	1355	705	1247	1346	1232	1002	1141	856	1387	1037	757	457	964	793	1185	1205	1246	614	910	704	1094	1404	1038	690	1199	576	884	1151	1022	697	881	597	1837	2589	1599	1530	1979	1771	1712	1451	1292	1346
AT1G16930	Carubv10009120	CARHR017440	Thhalv10000884	162	304	283	210	140	142	185	133	190	149	94	213	187	229	244	245	205	120	370	516	450	352	346	368	378	557	337	496	340	311	373	494	421	495	322	322	437	634	495	773	608	1013	381	383	525	739
AT1G16950	Carubv10012478	CARHR017460	Thhalv10009335	0	1	0	0	3	2	0	2	1	0	2	4	0	0	0	0	0	1	0	0	0	3	2	7	0	0	0	7	0	5	0	0	0	1	0	1	6	48	1	66	11	75	6	66	8	21
AT1G16960	Carubv10010695	CARHR017470	Thhalv10009149	296	210	428	303	234	136	335	284	305	401	92	151	312	194	228	258	104	89	150	184	186	166	114	120	145	123	277	231	86	50	224	187	275	209	119	100	90	158	165	154	103	144	115	86	99	157
AT1G16970	Carubv10008595	CARHR017480	Thhalv10007085	626	661	776	530	916	862	618	589	632	691	610	735	628	575	586	615	798	561	549	323	431	391	612	516	497	472	351	422	477	308	429	331	416	476	441	340	591	663	673	572	897	1316	441	431	534	503
AT1G16980	Carubv10012173	CARHR017490	Thhalv10009417	0	1	1	6	0	0	0	0	0	0	0	0	0	0	0	1	0	0	0	0	0	0	2	0	0	0	0	2	0	0	0	0	0	0	0	0	0	0	0	0	0	1	1	0	0	0
AT1G17030	Carubv10008922	CARHR017560	Thhalv10007403	0	19	22	1	15	2	17	11	24	0	15	5	12	11	7	9	23	1	2	9	16	6	18	6	3	9	5	2	7	5	12	3	5	12	13	2	3	1	7	2	8	0	4	2	4	2
AT1G17040	Carubv10011338	CARHR017570	Thhalv10006979	220	181	258	217	328	368	237	197	224	199	184	239	309	174	198	217	318	179	354	191	283	337	456	420	315	264	298	382	386	280	333	212	401	304	400	327	323	322	381	274	493	732	202	246	269	252
AT1G17050	Carubv10009229	CARHR017580	Thhalv10007715	1142	1504	685	636	4342	3121	1033	983	606	513	2075	2672	1347	1418	659	810	3970	2255	2418	886	1937	1527	4287	2470	2037	919	1489	1118	2684	1796	2783	1536	1740	1210	3749	2194	2172	2028	494	421	3979	2581	1800	1305	424	267
AT1G17060	Carubv10008841	CARHR017590	Thhalv10007523	201	600	362	590	237	350	158	355	349	354	133	291	253	464	298	465	204	190	58	300	129	311	128	303	175	493	277	541	117	212	101	272	179	375	101	162	85	221	156	227	236	402	96	183	317	182
AT1G17070	Carubv10012542	CARHR017600	Thhalv10006789	365	845	609	468	470	413	370	364	440	358	203	410	461	732	539	599	668	341	555	664	278	551	646	510	406	603	425	449	375	399	431	659	504	414	558	471	702	890	750	636	1036	1464	506	559	599	523
AT1G17080	Carubv10010518	CARHR017610	Thhalv10008982	1063	1654	1363	1651	1383	1836	1067	1434	1119	2183	970	1464	1065	1182	1110	1601	1186	1320	1311	1787	1432	1581	1082	1887	1495	1653	1845	2157	1102	1212	1395	1570	1576	1681	1240	1528	1016	2303	1409	1606	1740	2556	1178	1469	1233	1691
AT1G17090	Carubv10011434	CARHR017620	Thhalv10009905	61	63	145	83	165	162	62	19	119	77	78	114	103	33	86	67	90	82	39	50	58	29	46	56	86	86	93	96	57	29	61	54	60	63	58	51	96	134	274	129	180	136	70	105	223	115
AT1G17100	Carubv10010190	CARHR017640	Thhalv10008655	817	700	3999	2093	5607	4201	1295	628	3888	2373	3377	3332	999	883	2741	2954	3498	3574	1439	443	1059	1864	5702	4276	1494	465	2505	1992	6690	4027	1396	336	1998	1607	4978	3892	0	0	0	0	0	0	0	0	0	0
AT1G17110	Carubv10011568	CARHR017650	Thhalv10006749	1332	1551	1954	1458	1599	1482	972	937	1566	1017	842	1505	1331	1450	1642	1608	1647	1060	1673	725	766	1418	1826	1164	1046	771	1247	1101	1224	847	1246	756	1444	1183	1459	1058	914	1002	1172	811	1281	1405	647	588	773	544
AT1G17120	Carubv10008669	CARHR017660	Thhalv10007175	588	799	906	683	621	688	602	413	680	549	334	614	676	650	847	755	706	441	994	717	643	853	858	768	765	584	791	825	527	628	914	535	927	740	923	804	728	922	951	841	749	763	729	610	802	686
AT1G17130	Carubv10009751	CARHR017670	Thhalv10007973	964	1365	1922	1530	1773	1383	1093	1267	1545	1470	1165	1521	1417	1221	1306	1438	1883	1174	1650	1866	1612	1505	1734	1928	1658	2033	1578	1885	1599	1246	1625	1935	1666	1718	1609	1591	1647	2175	1829	1650	3078	3860	1557	1396	1538	1740
AT1G17140	Carubv10009626	CARHR017680	Thhalv10008080	1908	965	1373	645	1241	922	1918	1501	1452	1261	1161	1198	1850	1208	756	511	785	963	1231	1117	627	658	1149	1052	1202	931	1566	1044	1129	629	1179	976	1496	1071	1153	807	695	516	723	242	616	301	809	316	393	249
AT1G17147	Carubv10010726	CARHR017720	Thhalv10009187	104	1369	135	240	77	290	64	1367	129	232	55	363	62	2294	111	180	30	230	99	7127	348	234	124	750	95	5760	182	348	74	407	109	8410	255	486	114	357	104	2609	190	209	147	614	154	2490	121	308
AT1G17160	Carubv10009429	CARHR017740	Thhalv10007918	424	789	690	550	452	518	343	460	600	495	243	532	458	698	576	707	526	409	625	752	779	968	679	587	549	634	907	856	569	583	603	674	807	767	590	656	380	455	453	480	407	455	339	267	429	344
AT1G17180	Carubv10010257	CARHR017750	Thhalv10008735	183	676	751	1185	650	628	256	295	497	1002	327	829	118	284	303	495	685	442	498	1402	3222	1980	1486	1053	711	1433	1537	1260	642	769	1195	1843	1140	1458	1151	1287	289	704	2690	814	1172	1818	223	472	4046	819
AT1G17190	Carubv10010264	CARHR017770	Thhalv10008734	360	250	367	123	457	117	250	246	442	162	321	191	440	197	272	96	280	85	2797	1306	3478	2790	2096	2203	2592	1290	2961	3417	2076	1616	2723	1495	3196	2721	3394	2658	5178	5424	8643	4026	6311	4419	7535	3204	6696	4592
AT1G17200	Carubv10010315	CARHR017780	Thhalv10008792	1383	997	1488	696	1197	763	1841	1158	1707	1191	986	882	1558	837	1122	791	736	760	933	668	673	257	972	861	1037	671	626	352	1047	628	1147	578	666	374	1049	748	1814	1616	2315	1054	1779	1118	2629	869	1953	1202
AT1G17210	Carubv10011970	CARHR017790	Thhalv10006705	1953	2308	2678	2140	2500	2242	1431	1171	1801	1682	1509	2206	1619	2024	2283	2791	2984	1735	1789	836	761	1853	2565	1661	944	748	1103	1245	1278	1438	1235	812	1311	1117	1870	1579	2875	3156	3492	2927	5119	6241	2063	1636	2303	2222
AT1G17220	Carubv10008177	CARHR017800	Thhalv10006681	6841	8049	10900	5883	7380	7518	4633	3962	8012	3876	3526	7448	8072	9087	11337	10446	10065	4565	16591	7146	3656	9320	15646	7314	8352	6614	8027	7381	8685	6198	10858	7696	8073	6479	13546	8295	6426	5774	10076	4483	5988	3350	4646	3879	6028	2191
AT1G17230	Carubv10008143	CARHR017840	Thhalv10006611	289	928	616	655	518	648	222	376	411	412	104	538	398	771	560	804	564	377	348	355	117	318	767	494	253	257	250	279	375	359	276	261	252	278	416	366	417	680	446	459	725	807	357	373	406	294
AT1G17260	Carubv10008225	CARHR017850	Thhalv10006710	59	79	74	58	92	68	36	59	58	33	44	87	68	66	64	44	64	42	188	56	79	138	350	198	135	57	115	87	190	140	132	55	165	129	223	144	116	116	61	22	76	32	48	53	53	28
AT1G17270	Carubv10008696	CARHR017860	Thhalv10007186	166	283	265	249	207	182	213	166	176	174	60	169	142	245	216	207	154	133	261	171	225	276	268	245	431	213	266	282	285	210	268	160	330	266	332	278	351	370	362	390	356	225	380	209	320	446
AT1G17280	Carubv10010163	CARHR017870	Thhalv10009625	1327	1503	1398	1366	1351	1396	1556	1416	1155	1578	944	1306	1448	1183	1187	1306	1253	1117	1499	1336	1091	1142	1268	1386	1563	1408	1250	1441	1256	994	1507	1218	1293	1342	1339	1146	303	453	479	489	716	1170	299	320	429	363
AT1G17285	Carubv10011991	CARHR017880	Thhalv10009909	53	68	68	37	144	50	96	56	71	95	52	92	81	44	31	31	56	46	17	6	21	9	20	19	27	4	8	9	16	9	4	9	16	9	18	9	31	80	4	13	30	31	14	37	7	5
AT1G17290	Carubv10008780	CARHR017890	Thhalv10007290	2973	18438	10743	12724	5728	8941	3265	8806	6136	7394	2648	7240	3587	20457	8292	15152	7080	6371	5690	9156	7405	10190	7122	9945	5228	9303	7092	10336	5154	7991	5314	8629	7881	9138	6590	7842	4201	14050	6116	7962	9211	16614	3268	11193	5403	5699
AT1G17310	Carubv10011075	CARHR017900	Thhalv10009669	0	7	14	5	5	9	2	0	2	4	3	4	5	12	7	7	11	5	0	0	2	1	3	5	3	5	0	0	7	0	2	0	0	0	0	1	0	0	0	0	0	0	0	0	0	0
AT1G17330	Carubv10010080	CARHR017920	Thhalv10008690	458	1543	790	1422	688	1130	594	1568	674	1336	463	998	570	1209	615	854	491	629	875	2523	1577	1091	915	1417	1026	2544	1364	1362	708	898	888	2589	1479	1297	668	1130	151	204	167	110	203	186	159	159	134	109
AT1G17340	Carubv10011400	CARHR017930	Thhalv10006824	932	1471	922	1161	623	941	928	989	788	989	644	822	950	1395	1143	1236	851	527	505	905	209	569	471	492	427	1093	389	420	268	337	407	1020	392	469	417	350	743	1000	1007	1097	746	1106	638	632	798	739
AT1G17345	Carubv10010944	CARHR017940	Thhalv10009429	43	84	105	85	63	28	37	55	68	86	7	26	67	70	111	91	23	31	28	13	32	14	18	9	28	14	17	17	15	8	14	6	20	11	11	12	11	3	19	6	12	7	11	14	31	3
AT1G17360	Carubv10008164	CARHR017960	Thhalv10006648	816	1012	786	413	1465	1793	635	540	547	274	785	1303	806	1041	547	387	2119	890	2398	406	254	186	4463	1524	1438	515	255	170	2244	989	1379	540	287	155	3165	1194	418	333	449	196	1180	700	383	219	245	144
AT1G17370	Carubv10009263	CARHR017970	Thhalv10007746	2268	2217	2352	1345	2970	2203	2038	1808	2085	1564	2164	2328	2316	2287	1551	1615	2573	2193	3306	2256	1184	1986	3484	3307	2921	2245	2091	2264	2694	2575	2727	2197	2473	2398	3931	3116	2332	2695	2338	1458	2802	2516	1914	1422	1590	1241
AT1G17380	Carubv10009758	CARHR017980	Thhalv10008415	46	566	163	412	142	210	26	280	160	120	8	140	28	326	91	175	137	95	78	315	175	35	113	132	60	338	57	63	96	85	116	218	89	60	79	76	125	599	170	157	518	1066	118	471	110	143
AT1G17400	Carubv10009828	CARHR017990	Thhalv10009299	26	27	25	9	14	30	29	43	9	29	26	21	14	27	5	13	15	39	15	6	24	21	14	12	6	5	13	9	7	10	8	4	19	14	5	10	50	54	67	64	35	47	71	20	35	44
AT1G17410	Carubv10010406	CARHR018000	Thhalv10008875	318	254	229	210	259	208	195	273	257	237	202	192	264	209	208	219	175	161	305	313	227	333	184	273	377	300	445	461	247	242	308	316	478	436	254	317	187	176	155	97	93	57	152	74	137	110
AT1G17420	Carubv10008244	CARHR018010	Thhalv10006732	111	827	338	356	318	511	129	453	273	177	138	294	105	1011	267	436	412	211	92	577	11	43	224	349	100	659	15	53	149	113	88	558	50	94	238	243	58	154	71	31	334	212	84	125	72	30
AT1G17430	Carubv10009687	CARHR018020	Thhalv10008164	155	186	256	185	217	116	111	110	215	189	108	202	250	157	201	179	148	117	31	29	26	17	35	24	27	33	27	14	27	16	25	19	31	26	42	5	354	108	499	212	460	296	289	79	405	163
AT1G17440	Carubv10008470	CARHR018030	Thhalv10006997	723	1258	1061	1007	1187	1149	821	897	892	991	699	1140	910	1193	878	1263	1222	837	944	646	421	773	998	995	996	784	729	756	936	781	872	619	787	705	1102	881	709	607	1100	767	1051	1355	607	425	837	557
AT1G17450	Carubv10008077	CARHR018040	Thhalv10017997	516	753	747	770	458	524	309	324	510	378	225	543	454	730	751	1026	725	349	451	229	287	598	705	480	312	271	458	387	325	357	342	259	480	378	537	407	509	590	731	710	743	1027	290	318	461	434
AT1G17455	Carubv10011591	CARHR018050	Thhalv10009148	133	173	425	313	189	100	108	114	399	245	131	140	220	156	327	279	164	86	270	172	541	269	168	149	202	204	344	239	175	89	193	197	316	235	175	154	399	923	528	688	599	990	393	588	488	615
AT1G17460	Carubv10012426	CARHR018060	Thhalv10007199	134	102	329	210	160	106	109	44	246	190	178	84	179	101	392	267	279	121	116	53	117	76	181	149	105	59	82	66	142	80	126	58	119	86	151	113	147	87	236	108	130	147	96	62	176	86
AT1G17470	Carubv10009345	CARHR018070	Thhalv10007806	2224	2274	3324	2365	2725	1784	1949	1762	2465	2042	1554	1884	2226	2114	2568	2664	2566	1512	1361	856	1613	1628	1508	1381	1328	1013	1377	1552	1414	1171	1214	824	1632	1555	1531	1174	1953	1971	2281	1656	2026	1768	1477	1151	1708	1648
AT1G17480	Carubv10012653	CARHR018080	Thhalv10007911	87	74	131	54	118	61	63	77	130	49	68	66	54	73	95	40	52	51	58	24	66	20	57	24	15	41	60	17	66	14	31	35	27	34	29	20	45	36	80	27	35	17	33	26	37	29
AT1G17500	Carubv10008113	CARHR018100	Thhalv10006585	673	2175	1345	1949	785	1447	582	858	954	1006	423	1071	773	1795	1181	1872	1057	637	471	465	380	675	707	588	512	547	462	572	415	361	514	437	448	457	550	443	1096	1748	1360	1781	1850	2997	836	1200	1152	1064
AT1G17510	Carubv10010655	CARHR018110	Thhalv10009138	213	228	552	276	392	230	195	157	345	339	220	285	283	174	334	293	339	279	366	325	515	237	396	303	592	328	484	383	600	187	395	270	470	406	404	382	326	343	267	159	261	195	331	160	274	173
AT1G17520	Carubv10009890	CARHR018120	Thhalv10008387	532	563	678	654	603	527	610	585	634	732	404	471	652	474	597	604	460	365	1066	816	858	971	923	988	1195	952	1067	1138	919	625	1014	884	1268	1206	1001	996	524	572	425	492	600	697	418	334	371	400
AT1G17540	Carubv10008461	CARHR018140	Thhalv10006957	0	0	0	0	0	0	0	1	0	0	0	0	0	0	1	0	0	0	5	2	4	5	6	3	2	5	7	5	0	1	7	4	6	7	3	6	0	0	0	0	0	0	1	0	0	0
AT1G17550	Carubv10009389	CARHR018160	Thhalv10007386	1020	1355	1253	1234	1116	1089	662	837	983	772	677	1071	839	1202	927	954	1216	777	1094	554	681	655	1143	732	756	480	597	558	806	541	910	511	677	500	1056	720	1187	1745	1375	1192	1641	1913	969	1151	1052	995
AT1G17560	Carubv10010419	CARHR018170	Thhalv10008890	248	163	546	136	431	164	283	137	435	203	265	295	360	210	237	153	291	230	317	200	357	240	401	455	435	341	338	267	493	224	260	243	386	325	338	378	753	858	691	274	856	248	668	521	497	229
AT1G17580	Carubv10011741	CARHR018180	Thhalv10006551	1303	1904	1928	1519	1226	1051	1167	1090	1327	1200	741	1008	1234	2011	1922	2036	1527	773	965	481	281	653	1493	794	511	482	559	501	873	476	627	438	515	442	1084	593	894	1252	1194	951	1115	1462	644	629	863	635
AT1G17620	Carubv10010038	CARHR018230	Thhalv10008522	869	735	1195	719	1337	957	779	550	828	398	890	923	1053	848	542	479	1174	945	354	451	250	282	1055	767	405	521	247	267	854	664	424	381	286	205	705	616	697	1435	913	914	1835	1885	809	916	1003	660
AT1G17630	Carubv10011006	CARHR018240	Thhalv10009551	37	83	160	101	67	38	19	27	100	16	34	61	79	82	158	128	139	47	118	54	92	102	197	130	77	80	126	70	150	61	85	76	136	110	131	112	112	158	244	120	183	127	99	92	176	103
AT1G17640	Carubv10012031	CARHR018250	Thhalv10007978	166	142	195	148	101	72	116	166	169	123	107	107	194	148	177	139	96	67	286	147	84	152	118	66	217	144	156	141	90	45	218	192	277	198	136	81	584	681	607	487	494	471	498	374	449	488
AT1G17650	Carubv10011580	CARHR018260	Thhalv10008217	911	805	1359	528	858	466	892	768	1328	643	768	503	1030	840	1181	630	666	454	2337	1468	1962	1569	2126	1180	1672	1432	2261	1563	1687	892	1734	1582	2340	1631	1943	1274	510	471	622	322	378	229	509	376	460	224
AT1G17665	Carubv10011678	CARHR018270	Thhalv10008108	29	24	1132	836	70	44	38	50	1000	1289	76	47	48	32	1147	844	87	48	182	135	223	241	200	152	189	129	270	235	226	99	219	142	300	261	210	135	420	657	827	754	503	733	414	414	703	708
AT1G17680	Carubv10008264	CARHR018280	Thhalv10006758	563	853	935	804	603	615	398	416	611	595	343	594	566	774	1021	1042	730	417	921	645	667	1086	937	658	693	672	853	912	605	544	925	667	1197	885	754	687	676	674	851	841	633	741	523	441	736	784
AT1G17690	Carubv10012647	CARHR018290	Thhalv10006892	991	1311	1969	1264	1982	1285	750	717	1384	1080	983	1382	1322	1195	1471	1280	2580	956	464	216	439	463	1219	704	866	460	573	471	873	449	636	253	657	648	675	481	2399	2111	2428	1588	3003	2428	1703	1286	1752	1475
AT1G17700	Carubv10011150	CARHR018300	Thhalv10009485	81	80	63	33	100	68	50	71	73	47	42	82	76	59	35	34	75	58	48	29	39	65	52	35	23	17	53	30	47	20	28	25	65	44	37	30	73	79	126	88	61	41	74	47	60	70
AT1G17720	Carubv10008904	CARHR018330	Thhalv10007406	2094	2916	3305	2847	3344	3344	2222	2181	2735	2816	2345	3044	2436	2753	2543	2568	3359	2440	1693	1921	895	1578	1858	2165	2141	2107	1540	1816	1780	1522	1628	1592	1547	1550	1662	1685	2346	3168	2447	2386	4082	4382	1840	1989	2154	1848
AT1G17745	Carubv10008585	CARHR018350	Thhalv10007072	1240	2825	5205	9585	3526	4525	1201	1356	3424	7242	1721	4104	773	1408	1861	6901	3387	2711	478	684	862	3107	917	1461	733	684	1539	2808	964	1415	609	373	1654	2477	1008	1345	2118	3948	4697	7466	4295	7167	1331	2578	4909	6314
AT1G17760	Carubv10011584	CARHR018370	Thhalv10006915	509	680	804	526	721	532	486	372	577	463	395	678	566	644	727	739	884	491	384	295	328	318	573	422	378	381	288	303	400	301	300	329	349	343	519	370	353	443	375	325	621	663	270	268	226	233
AT1G17770	Carubv10011407	CARHR018380	Thhalv10017698	0	0	0	0	0	0	0	0	0	0	0	0	0	0	0	0	0	0	0	0	1	2	1	3	0	1	1	1	0	0	0	0	0	1	0	0	0	0	0	0	0	0	0	0	0	0
AT1G17780	Carubv10012112	CARHR018390	Thhalv10018751	470	610	614	769	671	765	700	472	529	644	483	657	707	420	574	709	601	444	290	222	212	330	224	384	433	260	370	551	268	234	360	201	545	570	294	334	281	350	284	308	344	505	255	210	238	401
AT1G17790	Carubv10009010	CARHR018400	Thhalv10007478	332	355	358	280	278	270	332	286	307	383	256	269	302	260	262	292	300	212	312	251	129	230	339	246	203	247	339	242	210	174	263	231	321	281	281	271	458	496	471	333	401	493	342	312	310	368
AT1G17800	Carubv10011266	CARHR018410	Thhalv10019549	0	0	0	0	2	0	0	0	0	0	0	0	0	0	0	0	0	0	0	0	0	0	0	0	0	0	0	0	0	0	0	0	0	0	0	0	0	0	0	0	0	0	0	0	0	0
AT1G17810	Carubv10012552	CARHR018420	Thhalv10008480	10	2	1	33	3	3	0	3	11	37	0	7	8	1	17	88	0	0	0	2	2	2	1	1	0	5	0	1	0	2	4	0	0	12	3	0	5	7	13	6	11	7	3	7	5	4
AT1G17820	Carubv10008308	CARHR018430	Thhalv10006829	455	647	553	786	569	690	415	427	456	560	415	611	527	548	569	694	629	411	296	234	93	273	458	446	300	245	225	313	318	288	332	211	290	270	374	395	529	753	706	717	805	1181	468	455	531	557
AT1G17830	Carubv10009679	CARHR018440	Thhalv10009965	112	141	212	124	419	475	158	129	113	159	376	326	125	158	80	156	414	216	91	61	129	68	309	208	186	68	94	112	236	163	175	86	97	113	261	190	60	114	97	169	135	160	50	54	59	196
AT1G17840	Carubv10008462	CARHR018450	Thhalv10006960	1592	2135	2095	1091	2440	1883	1469	1003	1759	857	1267	1668	1811	2211	1753	1301	3074	1325	1582	1335	1561	1365	3875	1824	1606	1313	1910	1276	2709	1672	2070	1468	1897	1106	2489	1951	1733	1626	2659	1194	4206	2634	1902	974	1993	1202
AT1G17850	Carubv10010974	CARHR018460	Thhalv10007680	971	493	1351	564	883	526	804	523	1210	608	640	607	1040	625	1020	807	707	460	1102	419	736	636	853	436	644	468	742	500	659	412	850	479	908	603	869	488	1319	866	1458	732	732	433	1122	394	992	814
AT1G17860	Carubv10011616	CARHR018480	Thhalv10008818	1401	4842	2386	5472	2411	5559	1523	2867	1550	4184	1385	3725	1786	3192	1491	4847	2331	3486	1094	6233	3762	6072	3301	9348	3579	6642	2908	8094	2638	7037	2226	5697	2251	6704	1981	5671	1339	6593	1862	6656	3179	8955	1521	4486	1969	6318
AT1G17870	Carubv10011415	CARHR018470	Thhalv10007206	274	198	174	160	814	414	174	151	114	69	259	242	276	182	192	85	769	286	630	193	47	53	168	144	264	134	53	57	231	105	431	209	81	70	775	388	1123	1133	326	168	735	1826	931	408	206	153
AT1G17880	Carubv10010502	CARHR018490	Thhalv10008957	7216	5810	10499	5211	10528	5735	8566	6510	9792	6484	7278	6727	8887	5802	5917	4724	8042	5966	5876	3651	7171	3407	6008	4393	7650	5746	4985	4239	6900	3887	5646	4532	4275	4041	5773	4374	7495	7850	6956	4993	6832	3945	7011	4525	5768	4827
AT1G17890	Carubv10009714	CARHR018500	Thhalv10008184	987	1899	1935	1984	1496	1662	1175	1353	1386	1389	785	1579	1266	1743	1138	1874	1374	1355	1540	1966	1765	1715	1570	1764	1685	2033	1847	1692	1667	1588	1407	1600	1603	1548	1623	1661	760	1249	966	935	1051	1216	820	724	820	773
AT1G17920	Carubv10008485	CARHR018540	Thhalv10006969	136	96	270	85	136	80	98	97	220	86	143	160	166	143	153	79	114	68	304	183	148	211	289	189	173	173	306	240	167	87	275	191	326	172	186	153	218	129	276	71	159	60	201	82	201	84
AT1G17930	Carubv10009018	CARHR018550	Thhalv10007522	359	344	417	403	334	318	291	221	377	370	245	328	364	289	360	418	283	192	273	184	215	261	240	227	251	237	300	250	240	135	250	151	300	332	205	236	469	485	491	457	516	583	325	237	412	569
AT1G17940	Carubv10009322	CARHR018560	Thhalv10007785	277	241	516	303	375	288	311	210	384	297	157	228	325	324	411	409	272	183	724	403	603	618	785	535	581	359	564	597	560	381	610	401	663	475	502	475	996	1005	1050	676	908	692	896	554	881	667
AT1G17950	Carubv10012605	CARHR018570	Thhalv10008597	41	59	26	35	8	42	40	38	21	21	18	30	10	35	32	34	37	19	10	23	18	7	14	19	12	27	13	6	17	13	18	39	10	23	17	14	29	65	43	14	23	36	31	20	20	23
AT1G17970	Carubv10009526	CARHR018580	Thhalv10007935	374	164	485	228	256	245	606	276	356	435	594	219	454	192	495	370	226	149	1117	426	485	693	792	544	728	288	661	650	652	385	1022	432	961	775	976	594	249	197	255	130	242	184	209	127	205	116
AT1G17980	Carubv10008394	CARHR018590	Thhalv10006945	959	1508	1223	1000	904	761	1052	1121	908	1066	975	802	1004	1492	1200	1013	1017	678	1500	1889	1025	1330	2039	2010	1534	2019	1579	1711	1658	1338	1492	1794	1846	1579	1567	1771	812	1639	1007	855	1549	1850	588	1063	735	671
AT1G18010	Carubv10009079	CARHR018600	Thhalv10007558	0	0	0	0	0	0	0	0	0	0	0	0	0	0	0	0	0	0	213	361	263	281	396	522	210	240	183	257	211	331	205	252	189	264	310	467	186	443	673	759	173	232	258	264	570	677
AT1G18020	Carubv10012098	CARHR018610	Thhalv10009775	3	0	0	0	0	0	0	2	0	0	0	2	0	0	2	0	0	1	417	248	190	467	284	349	221	141	176	488	266	308	422	163	474	505	541	560	4647	13021	10128	10953	1362	2191	7244	8624	7358	11451
AT1G18030	Carubv10011250	CARHR018620	Thhalv10007969	776	540	515	537	523	435	635	568	479	790	323	432	638	464	479	390	369	344	243	111	122	156	156	164	227	146	190	234	165	153	197	108	237	231	141	179	199	337	185	121	157	175	189	223	113	109
AT1G18040	Carubv10011276	CARHR018630	Thhalv10007847	357	311	468	215	348	168	354	322	449	289	244	317	367	333	318	212	282	184	276	98	189	131	256	132	142	132	189	123	183	114	169	127	177	127	249	131	231	243	239	139	272	231	174	135	161	149
AT1G18060	Carubv10011009	CARHR018640	Thhalv10008687	2999	1899	1250	709	2861	1998	2849	2261	1235	906	2408	2001	3015	1908	1143	725	2005	1638	2284	1544	2242	1595	1835	1783	2132	1590	2114	2097	1686	1196	2055	1520	2047	1861	2113	1598	783	1064	1358	727	916	701	969	611	1016	672
AT1G18070	Carubv10008818	CARHR018650	Thhalv10007335	4240	5907	7114	5609	7603	6249	3988	4269	5454	4848	5327	5972	5098	6014	5974	5405	8281	4751	5338	4063	4410	5674	7311	5514	6040	4859	5454	5410	6278	4532	5625	4983	5807	5584	6110	5587	3941	5376	6589	6043	8481	9787	3014	3858	5009	4000
AT1G18080	Carubv10009720	CARHR018660	Thhalv10008183	15047	11616	22714	11071	20412	11211	17011	13501	19708	15200	17054	12957	16142	12033	10621	10959	14614	12506	13483	9537	8049	8558	12235	9364	15614	12453	11637	9844	14282	9084	11378	9606	9347	9395	11949	9241	21314	23534	22600	14166	19744	9382	20159	12076	17140	10961
AT1G18090	Carubv10008695	CARHR018680	Thhalv10007197	378	182	388	189	710	356	327	152	329	111	419	361	390	207	305	199	515	245	339	106	267	150	439	151	249	122	205	175	345	161	279	127	219	164	329	178	517	312	413	275	569	282	337	164	368	201
AT1G18100	Carubv10011138	CARHR018690	Thhalv10009636	60	50	191	65	164	95	42	34	72	49	120	76	63	58	72	74	288	70	8	12	13	7	28	6	5	22	5	16	20	2	20	13	7	3	10	11	12	4	13	0	36	12	12	11	2	1
AT1G18140	Carubv10008683	CARHR018700	Thhalv10007176	38	211	107	46	75	42	13	89	81	80	35	37	42	219	53	46	65	18	131	299	60	102	127	81	86	203	129	67	46	53	128	114	90	107	110	36	138	482	81	86	107	72	73	217	56	27
AT1G18150	Carubv10008665	CARHR018710	Thhalv10007165	800	1098	1516	1086	1203	926	740	577	1238	1016	881	1062	869	989	1134	1145	1225	720	1017	973	733	1133	1049	854	901	1025	1172	1186	810	935	933	952	1033	951	983	879	1063	1484	2853	2267	1098	1080	998	1009	2246	1699
AT1G18160	Carubv10012038	CARHR018720	Thhalv10006685	1408	3120	1969	2337	1066	1609	1133	1738	1581	1602	851	1496	1499	2558	2088	2426	1399	886	1674	1792	1145	1858	1510	1199	1413	1811	1589	1627	1024	1114	1440	1743	1662	1466	1189	1158	1194	1760	1839	1922	1196	1872	882	904	1319	1626
AT1G18190	Carubv10011252	CARHR018770	Thhalv10007004	621	761	806	685	473	524	497	508	672	442	241	605	732	682	596	653	669	371	887	523	310	638	540	437	789	604	735	661	473	335	803	505	803	719	598	488	488	674	628	588	625	698	401	421	510	402
AT1G18200	Carubv10011865	CARHR018780	Thhalv10008703	148	270	174	334	204	289	118	295	120	446	107	159	173	103	145	265	78	104	151	146	157	234	55	85	256	153	153	366	43	67	113	143	225	367	89	98	11	36	30	40	36	60	21	27	28	51
AT1G18210	Carubv10010474	CARHR018790	Thhalv10008945	1816	6916	3969	4982	2074	3146	1825	5248	3560	3864	1098	3058	1968	5371	2527	4067	1593	3262	1488	2404	2950	2748	1281	2282	1692	1942	2396	3277	1471	1820	1669	1950	2297	3389	1458	2562	791	3272	891	1455	2060	3106	747	1851	989	962
AT1G18250	Carubv10010135	CARHR018800	Thhalv10008614	551	346	1045	144	827	215	543	421	1008	284	523	370	596	437	341	150	284	366	551	402	223	199	453	308	402	368	429	194	440	290	413	273	353	334	509	275	523	867	864	1266	298	212	465	419	548	583
AT1G18260	Carubv10008501	CARHR018810	Thhalv10006987	1479	2304	1694	2106	1424	1520	1417	1281	1311	1469	1039	1549	1297	1750	1540	2302	1727	1460	1920	2160	1511	1802	1399	1676	1842	1950	1516	1532	983	1261	1484	1300	1435	1371	1379	1684	2379	3000	1733	2676	1776	3285	1870	1754	1520	1875
AT1G18265	Carubv10011169	CARHR018820	Thhalv10008550	43	8	107	39	49	17	28	10	101	61	40	44	41	15	99	56	25	19	101	7	77	87	195	81	43	10	148	126	121	44	73	9	149	88	373	98	0	0	0	0	0	0	0	0	0	0
AT1G18270	Carubv10011390	CARHR018830	Thhalv10006567	2427	5058	3763	5528	1697	2154	1943	2472	2664	3856	951	1941	2306	3114	5001	8077	2336	1169	3696	4058	1841	8124	1429	1172	2180	3037	3790	5701	987	878	3323	3834	6448	5700	2389	1519	2433	4522	6078	9791	2056	4793	2252	2391	4723	9859
AT1G18280	Carubv10012497	CARHR018840	Thhalv10008878	0	5	7	10	1	3	8	2	3	9	0	3	3	0	6	15	5	1	12	4	1	4	4	2	5	2	0	9	5	2	4	0	1	4	6	1	2	7	0	8	1	1	3	0	0	6
AT1G18290	Carubv10010107	CARHR018850	Thhalv10009618	20	34	46	45	31	63	22	18	34	65	38	33	44	18	44	37	43	29	110	9	66	66	46	23	155	20	55	58	80	44	165	43	42	19	93	95	7	13	21	33	21	11	4	5	17	21
AT1G18330	Carubv10009624	CARHR018900	Thhalv10008035	496	467	151	139	674	518	519	285	97	71	272	366	541	219	178	98	574	350	3738	656	251	61	1670	1559	1848	626	162	98	980	1216	2227	696	92	78	1958	1539	1795	1209	65	73	1079	1022	1425	403	48	68
AT1G18335	Carubv10010010	CARHR018920	Thhalv10008624	379	263	289	243	398	283	331	315	248	194	272	327	414	214	256	205	294	233	253	223	176	86	158	206	234	220	144	139	174	101	234	214	203	153	183	156	165	207	104	102	115	91	181	95	70	94
AT1G18340	Carubv10009867	CARHR018930	Thhalv10008316	367	301	473	297	431	295	332	286	408	348	350	384	476	303	291	308	381	226	604	368	281	380	511	503	634	434	556	495	586	391	581	392	572	534	539	438	132	83	134	78	134	123	98	61	87	78
AT1G18360	Carubv10009378	CARHR018950	Thhalv10007718	367	270	416	287	580	260	345	207	366	297	462	385	403	296	263	333	452	323	1042	721	818	690	756	661	626	469	827	818	724	462	939	546	974	706	832	669	618	538	154	144	875	589	456	250	113	127
AT1G18370	Carubv10008207	CARHR018970	Thhalv10006702	463	413	882	269	397	175	379	270	715	252	323	334	428	594	398	412	237	184	477	200	192	188	380	157	193	261	420	183	366	147	195	185	305	225	217	134	276	172	396	127	167	91	230	105	214	104
AT1G18390	Carubv10008544	CARHR018990	Thhalv10007020	225	3610	669	2654	345	1655	208	1811	549	1756	291	1171	203	3264	544	2630	282	895	332	6198	485	1793	1081	2990	424	4997	783	1666	748	3037	434	5595	774	1470	550	2046	567	3049	805	1617	1319	3021	515	2355	901	1395
AT1G18400	Carubv10009894	CARHR019000	Thhalv10008517	229	247	865	263	701	507	383	319	462	504	524	508	366	336	468	505	509	396	1100	517	736	670	1317	1229	1236	401	748	817	1299	445	1057	482	1045	778	1159	882	204	158	315	174	373	158	184	63	231	167
AT1G18410	Carubv10012358	CARHR019010	Thhalv10006662	7	16	22	10	29	7	6	6	24	8	29	13	29	8	13	15	17	4	10	2	13	19	20	5	7	21	22	9	12	16	6	2	18	9	22	8	21	26	24	14	10	14	9	5	13	10
AT1G18440	Carubv10009940	CARHR019050	Thhalv10009989	521	520	822	452	704	448	490	457	787	643	491	436	610	495	628	476	500	330	810	603	282	359	621	435	828	802	543	468	688	373	713	744	560	524	671	428	497	1206	705	623	506	811	473	778	495	621
AT1G18450	Carubv10009163	CARHR019060	Thhalv10007641	1781	1576	1929	1131	1926	1395	1774	1801	1769	1699	1561	1472	2012	1573	1430	1319	1550	1165	1367	1176	955	1013	1149	1280	2041	1377	1530	1589	1425	829	1345	1220	1563	1580	1220	1079	1383	1452	1356	1191	1371	1255	1076	808	1180	1211
AT1G18460	Carubv10008464	CARHR019070	Thhalv10006963	2174	2326	982	835	1444	1652	1468	1339	774	737	898	1602	1600	1568	1245	1215	1903	1206	2157	873	335	472	640	473	1155	766	506	420	363	392	1231	951	646	335	1278	671	402	222	344	168	665	358	330	117	187	181
AT1G18470	Carubv10009059	CARHR019080	Thhalv10007552	933	1073	1711	1644	857	959	913	881	1419	1454	662	939	921	1021	1569	1698	939	703	956	631	942	1469	515	800	950	711	1219	1539	549	613	972	685	1479	1406	810	956	1065	1874	1821	1617	1981	2938	1167	1132	1347	1783
AT1G18480	Carubv10017403	CARHR019100	Thhalv10007840	560	1183	1327	1136	1121	1156	417	754	935	769	516	1113	778	1020	920	938	1153	865	307	522	261	295	288	307	398	523	298	272	239	216	240	436	283	232	228	276	0	0	0	0	0	0	0	0	0	0
AT1G18490	Carubv10009776	CARHR019110	Thhalv10008420	358	251	532	240	418	291	329	275	454	344	275	279	395	209	378	320	299	212	772	428	1144	1192	750	510	864	495	1248	1326	784	440	788	525	1441	1059	981	645	192	176	229	147	146	133	135	102	173	155
AT1G18520	Carubv10011030	CARHR019140	Thhalv10009380	0	3	0	1	1	1	7	0	0	0	0	0	0	0	0	0	0	0	0	0	0	0	0	0	0	0	0	0	0	0	0	0	0	0	0	0	0	0	2	0	0	0	0	0	0	0
AT1G18530	Carubv10011170	CARHR019150	Thhalv10008984	0	0	3	1	0	0	0	0	0	0	0	2	1	1	0	1	0	0	0	0	0	0	0	0	0	0	0	0	0	0	0	0	0	0	0	0	2	8	0	5	4	9	0	2	1	4
AT1G18550	Carubv10008434	CARHR019170	Thhalv10006920	180	218	287	91	177	111	108	77	249	99	103	140	145	179	157	103	208	103	113	30	54	48	99	32	53	87	69	37	86	32	52	39	67	44	57	36	91	68	111	50	78	20	67	24	89	23
AT1G18560	Carubv10008481	CARHR019180	Thhalv10006990	163	250	169	135	206	190	221	118	135	128	83	173	158	290	148	161	182	134	275	408	72	121	218	230	225	400	121	154	145	147	162	319	123	90	199	187	308	527	300	268	257	345	240	312	234	336
AT1G18570	Carubv10009563	CARHR019190	Thhalv10008152	367	9240	1407	4581	262	3408	284	4449	686	2422	161	2453	334	7485	843	4666	280	1618	7	2222	21	154	33	917	63	2958	33	428	14	657	11	1814	40	300	14	391	829	4702	1058	2253	1083	2626	802	3762	840	2472
AT1G18580	Carubv10008800	CARHR019200	Thhalv10007318	391	668	854	747	579	637	401	398	620	438	342	628	469	573	621	706	711	464	656	696	913	726	698	610	687	709	778	656	687	670	701	607	846	585	624	696	755	939	874	991	974	1209	668	694	831	791
AT1G18590	Carubv10012097	CARHR019210	Thhalv10008073	399	1581	943	1314	985	1967	492	741	548	837	639	1385	337	599	395	1173	765	1020	115	99	152	112	199	212	109	134	115	181	121	143	178	41	66	63	202	112	103	206	159	137	142	209	93	96	127	184
AT1G18600	Carubv10009672	CARHR019220	Thhalv10008142	374	572	639	423	414	333	321	308	474	400	288	373	410	433	435	483	352	300	463	352	359	358	351	353	337	338	421	363	312	240	362	328	396	336	440	340	250	263	347	256	164	146	236	173	279	205
AT1G18610	Carubv10008756	CARHR019230	Thhalv10007275	367	244	470	360	522	401	317	279	407	292	516	388	385	293	345	344	452	245	718	378	236	745	696	749	684	395	817	817	587	303	704	329	1310	904	770	533	487	664	617	365	416	419	413	410	417	547
AT1G18620	Carubv10008208	CARHR019240	Thhalv10009952	2280	1594	1150	894	733	735	2085	1234	914	937	727	905	2464	1686	1246	1500	923	644	1305	405	480	848	881	476	647	306	619	752	451	320	865	340	893	622	878	389	1575	1151	1316	831	994	542	1415	611	935	704
AT1G18640	Carubv10010958	CARHR019270	Thhalv10008334	775	774	1011	795	697	610	673	680	883	721	597	771	890	765	849	788	684	600	1419	1286	1751	1080	1024	785	1333	1067	1307	1238	1018	717	1300	1156	1445	1115	1005	700	988	1261	1243	1284	659	663	975	761	934	1166
AT1G18650	Carubv10012483	CARHR019280	Thhalv10008839	1146	392	730	198	1006	379	1396	709	799	462	1111	542	1103	519	341	181	471	411	996	306	280	271	572	312	751	225	432	347	522	229	796	264	633	362	765	294	0	0	0	0	0	0	0	0	0	0
AT1G18660	Carubv10008983	CARHR019290	Thhalv10007493	1739	1552	2600	1964	3828	2925	1350	1190	2228	2049	1918	2354	1630	1342	2220	2281	2595	1711	1781	1004	1064	1750	3466	2795	1623	1027	1535	1997	2191	1671	1532	949	1843	1786	2557	1942	961	887	1340	1101	1983	2075	911	540	1012	1007
AT1G18670	Carubv10008466	CARHR019300	Thhalv10006926	406	474	553	196	401	276	286	173	418	178	287	372	437	397	392	223	482	216	566	1210	369	535	971	1118	486	1104	561	489	692	793	530	1239	517	539	556	748	279	306	323	182	245	155	206	115	221	125
AT1G18680	Carubv10010393	CARHR019310	Thhalv10008859	286	236	255	200	218	152	278	276	253	210	161	154	334	208	230	195	194	187	256	228	159	137	149	168	213	165	227	211	149	88	182	221	266	238	193	160	128	116	104	81	98	87	105	66	86	101
AT1G18700	Carubv10012083	CARHR019320	Thhalv10006967	1055	1039	1608	1190	1089	998	908	793	1188	1231	624	1036	1027	1210	1399	1512	1090	695	885	652	535	847	867	665	601	742	778	732	568	464	661	631	926	767	748	605	719	804	1223	1204	696	731	573	496	945	925
AT1G18710	Carubv10010045	CARHR019330	Thhalv10008528	73	35	52	12	148	72	45	29	43	25	247	49	65	34	11	11	23	34	26	7	2	2	17	1	5	5	4	1	5	2	10	3	1	0	5	3	2	7	6	1	38	6	14	0	4	0
AT1G18730	Carubv10010440	CARHR019370	Thhalv10008902	2520	2001	3911	2255	2444	2120	2783	2364	4252	2949	2733	2163	2703	1915	3616	2420	1746	1413	3032	2156	2156	1726	1760	1161	2014	1806	2300	2127	1388	472	2422	2027	3114	2137	2678	1299	1702	1843	2449	833	1403	952	2096	1139	1839	1125
AT1G18740	Carubv10009431	CARHR019380	Thhalv10010024	553	1308	699	928	554	834	409	752	570	403	257	851	585	1171	581	795	560	599	446	1614	452	386	338	527	293	1335	315	536	271	444	451	1800	523	573	374	489	504	1361	550	419	406	608	602	1091	464	394
AT1G18750	Carubv10009419	CARHR019390	Thhalv10007954	205	90	253	177	359	295	60	106	202	98	148	230	208	133	202	143	315	189	153	54	69	158	245	183	140	96	135	150	158	113	154	90	196	152	196	137	86	51	109	59	197	202	84	39	111	90
AT1G18760	Carubv10010970	CARHR019410	Thhalv10009703	0	0	0	0	0	0	0	0	0	0	0	0	0	0	0	0	0	0	0	0	0	0	0	0	0	0	0	0	0	0	0	0	0	0	0	0	0	0	0	0	0	0	0	0	0	0
AT1G18770	Carubv10012578	CARHR104640	Thhalv10009491	0	0	0	0	0	0	0	0	0	0	0	0	0	0	0	0	0	0	0	0	0	0	0	0	0	0	0	0	0	0	0	0	0	0	0	0	0	0	0	0	0	0	0	0	0	0
AT1G18790	Carubv10011133	CARHR019440	Thhalv10009845	0	0	0	0	0	0	0	0	0	0	0	0	0	0	0	0	0	0	0	0	0	0	0	0	0	0	0	1	0	0	0	0	0	0	0	0	0	0	0	0	0	0	0	0	0	0
AT1G18800	Carubv10010235	CARHR019450	Thhalv10008524	1644	1732	3306	1581	2918	1756	1940	1724	2634	2044	1884	2191	1957	1515	1840	1425	2597	1641	1392	1089	2081	1218	2765	2113	2341	1613	1665	1518	2270	1489	1617	1300	1317	1398	1641	1558	2349	2470	1900	1369	2502	2328	1873	1787	1571	1219
AT1G18810	Carubv10011880	CARHR019460	Thhalv10007914	174	154	118	84	343	223	164	93	139	65	257	216	189	97	104	113	229	129	189	34	40	5	710	371	165	35	31	14	193	140	185	24	20	2	328	147	157	144	30	42	400	307	217	45	44	31
AT1G18835	Carubv10011804	CARHR019470	Thhalv10009699	6	39	5	29	23	51	7	14	8	9	2	35	5	36	2	26	3	14	82	85	110	100	33	82	119	61	101	157	52	47	66	41	53	97	63	68	36	51	29	168	156	187	43	41	70	130
AT1G18840	Carubv10008698	CARHR019490	Thhalv10007212	885	732	1235	403	927	647	720	704	1031	457	929	851	1037	757	700	447	967	571	1368	675	1418	824	1251	887	1200	690	1212	970	1335	767	1187	675	1171	778	1183	704	2547	2287	2298	1516	2827	1952	1999	1317	1903	1217
AT1G18850	Carubv10009088	CARHR019500	Thhalv10007868	514	514	1208	601	1805	1128	525	453	847	716	975	1068	616	414	805	598	1361	957	517	229	672	606	1593	879	809	421	654	583	1101	627	579	289	640	677	648	622	1165	1028	1092	678	2049	1813	803	688	949	585
AT1G18860	Carubv10008977	CARHR019510	Thhalv10007461	66	243	91	332	74	395	41	100	54	166	98	264	65	159	82	327	80	209	12	143	57	136	77	335	66	160	70	261	45	245	40	143	68	158	47	128	33	297	82	672	155	937	35	251	266	472
AT1G18870	Carubv10008717	CARHR019520	Thhalv10007243	93	113	127	52	124	36	108	42	86	38	74	31	89	39	50	29	51	20	168	100	80	103	341	229	183	95	148	117	252	79	238	108	131	116	293	158	82	85	45	5	42	16	79	28	19	5
AT1G18880	Carubv10012216	CARHR019530	Thhalv10007154	535	921	828	382	725	579	245	292	557	365	308	561	421	469	484	450	646	386	29	33	17	29	45	61	20	37	8	13	30	28	21	13	14	28	14	13	112	281	132	138	117	131	91	139	63	149
AT1G18890	Carubv10008777	CARHR019540	Thhalv10007293	584	4147	1284	2089	855	2353	538	2311	980	1066	520	1620	592	3837	1217	2029	849	1252	523	2485	1024	738	1316	1500	669	2925	750	747	840	1053	676	2719	751	729	785	1041	453	1821	550	544	1393	2919	382	1308	403	422
AT1G18900	Carubv10008274	CARHR019550	Thhalv10009547	447	1315	833	784	1242	1212	266	486	537	322	515	1093	369	1252	596	746	1257	818	560	494	338	568	2051	1360	523	455	435	410	1067	1219	512	502	454	410	1215	1127	1052	1207	1076	984	2535	3200	717	753	829	878
AT1G18910	Carubv10008101	CARHR019560	Thhalv10006659	339	873	633	548	700	641	298	376	476	391	334	591	335	661	556	542	779	325	524	335	330	513	1359	842	695	450	315	359	549	500	571	388	331	343	835	595	539	446	525	272	1559	1299	378	223	356	214
AT1G18940	Carubv10008700	CARHR019570	Thhalv10007356	20	59	36	41	35	39	24	38	32	6	19	28	32	37	61	52	34	11	56	101	268	238	48	125	73	86	154	211	20	75	47	67	134	168	32	65	26	53	53	49	58	46	30	28	35	33
AT1G18950	Carubv10012346	CARHR019580	Thhalv10006851	1115	1267	1490	1231	1321	1107	966	826	1110	1119	800	1073	1081	1242	1243	1281	1293	763	905	760	312	775	926	727	719	872	566	650	679	544	664	718	798	661	749	624	665	667	708	630	1107	1229	492	383	596	592
AT1G18960	Carubv10012671	CARHR019590	Thhalv10008283	0	4	1	0	8	0	0	0	1	0	10	12	0	4	2	0	2	6	15	9	1	2	12	11	1	16	3	1	16	9	11	20	6	4	5	19	2	13	2	0	3	8	1	0	2	4
AT1G18990	Carubv10011395	CARHR019610	Thhalv10007355	18	8	2	5	7	2	8	14	4	3	0	6	17	5	5	7	4	7	169	86	40	88	100	106	93	52	61	78	92	46	117	59	126	99	77	48	9	34	14	15	39	44	16	15	12	8
AT1G19000	Carubv10011841	CARHR019620	Thhalv10008346	4588	4521	4810	3920	3412	3507	3804	2630	4157	2604	2142	3731	5057	3874	4658	4771	4743	3043	2871	1388	1577	2304	1849	1441	1516	1078	1533	1574	1196	1425	2290	1047	1862	1457	2874	1863	2498	2832	3231	2720	2717	2236	2296	1611	2307	2687
AT1G19010	Carubv10009495	CARHR019630	Thhalv10008269	264	347	359	290	337	308	249	250	324	277	211	269	298	295	239	297	267	227	204	240	175	242	109	153	251	221	246	287	159	134	229	180	264	302	187	142	115	335	117	99	80	120	93	268	92	103
AT1G19020	Carubv10010768	CARHR019640	Thhalv10009213	360	12163	1521	3950	814	3254	306	8668	1233	2659	453	2012	327	10040	857	2274	526	1865	25	2044	131	96	44	722	46	2289	18	132	28	298	26	2138	23	63	33	340	322	14730	355	733	530	2171	456	11991	199	917
AT1G19025	Carubv10008764	CARHR019650	Thhalv10007278	84	123	189	124	373	175	61	50	111	128	27	144	114	116	124	99	127	57	126	143	160	152	266	165	167	183	136	188	153	106	138	143	193	143	193	110	124	167	162	133	160	255	89	140	141	151
AT1G19050	Carubv10010295	CARHR019660	Thhalv10021491	418	628	701	235	1188	965	671	384	632	256	981	762	774	584	542	327	766	386	260	273	647	435	411	453	356	614	506	387	479	185	330	306	349	452	324	298	372	600	223	452	675	653	146	363	249	553
AT1G19080	Carubv10018083	CARHR165540	Thhalv10017287	283	161	303	250	300	233	327	281	283	303	299	216	264	165	178	205	251	167	412	275	421	404	343	358	454	350	494	549	445	258	357	311	598	519	481	372	103	115	107	76	65	62	84	71	87	98
AT1G19090	Carubv10008603	CARHR019680	Thhalv10007076	0	0	0	1	1	0	0	1	0	0	0	1	0	0	0	0	0	0	189	199	154	143	158	148	162	131	182	113	152	141	169	149	167	97	155	147	0	0	0	0	1	3	0	0	1	0
AT1G19100	Carubv10008534	CARHR019690	Thhalv10006991	368	438	603	443	618	495	299	292	443	402	270	497	404	388	471	514	544	305	500	286	276	501	589	427	538	275	432	489	496	348	478	326	567	515	501	403	755	714	808	562	783	654	453	461	647	508
AT1G19110	Carubv10008355	CARHR019700	Thhalv10006890	869	1788	1415	1185	1221	1150	898	727	1051	923	646	1007	1060	1376	1478	1503	1694	751	1677	1408	1553	2242	2393	1705	1112	1216	1612	1490	1147	1411	1450	1368	1871	1294	1732	1456	1059	1361	1323	1074	1343	1679	938	735	1102	865
AT1G19115	Carubv10012380	CARHR019710	Thhalv10009462	9	0	9	2	3	0	4	12	9	4	0	2	3	0	1	8	4	1	3	0	5	0	9	2	0	5	0	0	4	0	9	0	0	2	8	3	1	4	0	1	5	9	2	2	5	0
AT1G19120	Carubv10010639	CARHR019720	Thhalv10009105	946	997	1219	979	1050	855	1034	991	1123	1020	825	936	1054	874	873	724	781	706	1047	955	887	801	754	813	1265	1163	1080	1094	949	536	1051	911	1130	1070	726	789	787	817	795	738	787	840	775	468	696	731
AT1G19130	Carubv10010381	CARHR019730	Thhalv10008865	723	1561	1301	1647	1013	1608	798	1081	1120	1415	571	1298	789	1133	888	1548	806	1247	716	908	1775	914	772	899	674	866	1281	1036	909	817	818	801	1513	1091	715	762	832	2375	918	1330	1497	2851	600	1497	821	1585
AT1G19140	Carubv10009536	CARHR019740	Thhalv10008278	909	820	1156	914	1759	1361	769	798	943	1225	1277	1276	860	718	741	835	1301	1089	889	643	953	1031	1255	1215	982	669	894	1111	1224	959	764	669	1025	1064	1093	1162	669	821	1007	798	949	1368	555	528	717	595
AT1G19150	Carubv10012387	CARHR019750	Thhalv10008493	2629	1829	2112	1046	1477	1430	1701	1324	1958	973	1154	1602	2590	2057	1941	1653	1419	1307	1780	1073	855	701	851	511	581	573	953	691	646	338	1095	712	869	723	1629	743	1090	1201	1751	517	694	252	1072	532	1038	451
AT1G19170	Carubv10011469	CARHR019770	Thhalv10007407	358	323	499	381	409	298	267	212	377	276	170	288	353	297	334	348	378	251	462	285	399	347	343	305	374	271	323	345	330	322	355	201	426	301	364	331	558	1037	462	487	640	877	539	609	419	450
AT1G19180	Carubv10010018	CARHR019780	Thhalv10008419	822	9137	1926	5587	1250	2945	782	3965	1392	2026	643	2330	616	5384	984	2802	1284	1689	991	5710	1710	845	1055	1969	1123	7262	938	1015	818	1175	1230	5829	763	1126	1181	1238	699	5056	682	1203	2291	6034	589	4090	590	1168
AT1G19210	Carubv10011394	CARHR019810	Thhalv10009812	0	0	0	1	0	1	0	0	0	0	0	1	0	0	0	1	0	0	0	3	1	0	0	1	0	4	0	4	0	2	0	3	2	2	0	5	0	0	0	2	3	0	2	0	0	0
AT1G19220	Carubv10008159	CARHR019820	Thhalv10006635	469	574	676	507	337	359	448	303	579	436	262	375	454	610	642	687	383	219	291	222	120	411	382	348	313	234	299	268	261	262	318	198	343	285	320	252	370	606	637	574	531	636	338	415	457	423
AT1G19230	Carubv10008247	CARHR019830	Thhalv10006725	55	177	175	251	167	275	91	77	74	104	124	213	111	139	123	246	206	112	27	115	78	123	181	129	127	156	105	122	94	144	77	73	94	102	94	96	132	244	196	193	376	424	142	166	216	174
AT1G19240	Carubv10010715	CARHR019840	Thhalv10009175	359	492	564	430	434	385	298	497	584	626	231	453	430	405	319	402	357	338	241	145	463	146	219	178	356	182	293	172	290	100	204	149	229	233	209	148	159	127	138	92	146	140	123	46	137	85
AT1G19250	Carubv10008834	CARHR019850	Thhalv10007357	17	126	15	52	20	103	7	23	17	46	22	64	5	25	27	93	7	35	0	10	2	1	25	26	5	64	1	0	5	3	0	9	0	0	0	10	0	8	7	47	85	244	5	16	3	25
AT1G19270	Carubv10008839	CARHR019870	Thhalv10007382	447	1069	654	1200	357	772	422	660	580	686	306	571	463	939	626	960	448	487	505	1576	778	1064	490	1024	445	1734	944	1052	350	663	397	1415	1064	1068	390	662	434	1784	655	982	640	1836	391	1424	569	927
AT1G19290	Carubv10008259	CARHR019880	Thhalv10006776	115	323	347	191	164	138	32	39	205	76	63	157	187	310	351	312	441	90	323	101	207	299	419	238	246	123	218	213	299	175	216	168	324	251	298	217	294	322	339	245	391	377	223	176	263	172
AT1G19300	Carubv10012618	CARHR019890	Thhalv10008059	68	178	238	141	135	136	120	84	229	111	37	139	102	205	153	166	179	132	152	256	206	239	197	277	144	240	279	250	180	231	162	145	256	242	191	229	135	189	162	223	498	396	128	88	184	140
AT1G19310	Carubv10010212	CARHR019900	Thhalv10008430	267	1195	617	979	237	422	299	778	589	766	114	396	292	1109	472	776	188	320	503	1864	749	617	413	934	577	1930	720	785	305	573	486	1533	755	854	449	707	207	407	491	592	257	520	168	248	374	516
AT1G19330	Carubv10010116	CARHR019920	Thhalv10008586	417	299	582	294	362	375	418	338	522	423	355	461	369	295	332	265	205	282	690	625	754	1470	462	474	610	592	2115	2733	459	317	435	633	2208	2919	461	349	216	392	176	192	409	538	206	217	120	202
AT1G19340	Carubv10009255	CARHR019930	Thhalv10007768	192	92	228	65	252	191	186	59	170	88	217	139	227	91	165	63	243	122	232	148	144	223	234	229	263	108	216	260	294	227	237	86	256	268	233	226	358	324	242	131	302	156	260	162	215	91
AT1G19350	Carubv10009520	CARHR019940	Thhalv10008172	3922	2162	3862	1528	5264	2364	3391	1984	3439	1898	3525	3490	3823	2179	2866	1859	4964	2617	6183	2599	2602	3494	4443	3020	4810	1944	4486	3874	3626	2754	4874	2501	5105	3941	5427	3671	3049	2934	2304	1518	3677	2198	3033	1412	1658	1545
AT1G19360	Carubv10011112	CARHR019950	Thhalv10007712	964	2907	1776	2400	1526	2048	1036	1523	1297	1624	879	1686	1165	2214	1585	2191	1414	1249	835	1506	1266	1423	754	1146	802	1807	1159	1418	711	1036	902	1351	1173	1237	775	1024	1116	3652	1727	2713	2112	4483	1118	2754	1549	2067
AT1G19370	Carubv10012465	CARHR019960	Thhalv10009294	165	361	969	848	239	185	131	177	705	550	163	247	248	375	850	920	307	191	149	105	529	559	148	82	123	140	502	453	113	116	144	115	546	463	146	161	259	268	559	557	518	589	244	135	486	336
AT1G19380	Carubv10010542	CARHR019970	Thhalv10008999	351	9784	1165	1333	562	2073	476	5675	870	1070	489	1470	477	8067	613	1355	743	1514	672	3832	1749	1012	483	1133	611	3249	1068	1168	518	1050	652	2978	644	1054	511	1204	609	6633	491	994	1787	3202	731	4469	834	806
AT1G19390	Carubv10011311	CARHR019980	Thhalv10006827	0	0	1	1	3	0	0	3	0	0	0	0	0	1	0	2	0	0	8	40	49	21	39	28	23	67	13	19	22	17	18	29	17	29	31	19	2	291	8	19	16	116	2	313	0	4
AT1G19400	Carubv10009862	CARHR019990	Thhalv10008308	1863	1527	1758	2088	1304	1194	1766	1702	1680	2818	1012	1256	2090	1257	1949	2083	1087	698	1111	503	538	563	740	653	938	528	484	592	594	461	841	546	539	588	927	711	423	452	230	340	1350	1299	313	256	187	266
AT1G19430	Carubv10008443	CARHR020010	Thhalv10006932	703	706	923	690	668	562	680	569	726	666	579	687	825	787	875	743	785	422	1323	626	851	1062	1353	832	1066	639	874	1036	1033	607	1149	588	972	911	1319	880	1209	1073	1487	1303	1165	995	1015	625	1174	1051
AT1G19440	Carubv10011929	CARHR020020	Thhalv10007370	432	713	1190	609	1071	823	393	429	803	389	509	772	661	579	894	496	1117	611	330	1772	319	350	549	505	244	1563	341	307	342	461	355	1794	430	304	439	426	331	368	421	340	992	742	360	232	410	257
AT1G19450	Carubv10012080	CARHR020030	Thhalv10007486	1257	1533	1285	514	5871	4184	1077	863	785	363	2592	2882	2120	1931	985	568	5925	2109	423	292	300	403	849	467	306	262	422	451	938	431	414	320	344	342	683	489	511	620	517	850	1403	1854	448	502	619	682
AT1G19485	Carubv10010997	CARHR020050	Thhalv10006802	1223	858	1087	853	1105	742	1020	890	887	1055	579	861	1116	890	927	931	896	650	546	340	284	381	514	499	560	354	371	392	418	290	434	399	449	403	512	437	726	986	746	737	726	943	561	520	575	769
AT1G19490	Carubv10011417	CARHR020060	Thhalv10009681	124	107	68	71	549	379	82	67	41	12	185	278	93	70	39	51	424	230	234	215	18	112	489	374	216	195	78	80	298	200	216	153	93	137	305	252	353	309	80	115	792	790	203	190	62	72
AT1G19500	Carubv10012246	CARHR020070	Thhalv10009239	2	2	0	3	11	2	0	0	0	0	0	0	1	0	0	1	1	0	0	0	0	0	0	0	0	0	0	0	0	0	0	0	0	0	0	0	0	0	0	0	0	0	0	0	0	0
AT1G19510	Carubv10010724	CARHR020080	Thhalv10009748	31	36	90	56	31	38	5	22	78	57	1	28	22	20	88	66	30	22	170	88	100	164	64	110	96	31	85	138	43	38	165	79	110	121	93	96	18	37	27	44	68	25	22	11	14	23
AT1G19520	Carubv10008438	CARHR020090	Thhalv10006936	1054	1075	2108	1172	1667	1207	837	725	1484	1153	757	1491	1341	1100	1432	1343	1995	1036	1593	516	673	1468	1801	888	1362	675	1304	1276	1258	636	1264	656	1506	1279	1354	950	1789	1474	2310	1737	1927	1649	1421	912	1818	1166
AT1G19530	Carubv10010689	CARHR020100	Thhalv10009139	1735	2358	2083	3703	1451	873	1658	1416	1066	3164	658	737	2623	1486	1687	2724	685	430	785	856	3008	8287	308	1268	756	535	4424	9190	318	265	920	579	9426	10963	369	1084	912	1943	6097	7077	582	1231	1354	900	4664	8649
AT1G19540	Carubv10012117	CARHR020110	Thhalv10008380	236	171	218	184	75	38	354	188	195	358	17	69	251	99	168	226	37	48	170	142	172	91	368	283	141	157	125	119	252	177	197	147	137	107	329	153	358	2325	700	1531	640	1793	384	1805	567	1797
AT1G19570	Carubv10010286	CARHR020120	Thhalv10008761	3629	4360	5813	2528	5154	2706	3797	3894	5183	2867	3820	3843	3677	3760	3286	2391	4238	3477	1518	1951	4205	2449	1624	949	1438	1759	4976	2562	2048	733	1417	898	4305	2519	1774	1181	1354	1628	1637	708	1909	955	1516	855	979	714
AT1G19600	Carubv10009566	CARHR020140	Thhalv10008038	2245	1595	2512	1478	2411	1503	1821	1563	2079	1206	1179	1531	2103	1494	1759	1613	2078	1355	1554	1005	1431	2207	2043	1756	1500	988	2616	2773	1785	1032	1321	915	3128	2936	1487	1531	3103	3956	2782	2126	2683	1840	2654	1875	1936	2106
AT1G19610	Carubv10010796	CARHR247530	Thhalv10009242	133	338	125	355	259	1048	368	467	149	638	227	783	144	222	47	651	141	788	149	2941	337	3478	140	1838	199	2003	1065	4254	211	1552	187	1827	1025	4404	64	1823	10	26	11	12	31	30	10	11	9	9
AT1G19630	Carubv10009004	CARHR020150	Thhalv10007476	1	3	26	3	24	11	0	11	40	1	34	26	0	4	8	1	13	19	5	4	23	8	89	68	28	4	12	5	52	26	14	0	3	1	26	17	24	29	31	29	84	37	22	21	26	28
AT1G19640	Carubv10009402	CARHR020160	Thhalv10007856	13	19	19	6	46	15	4	8	6	0	28	27	8	7	10	4	33	18	32	13	9	9	79	30	11	8	22	3	40	10	29	17	31	10	60	23	2	4	0	0	3	0	2	1	0	0
AT1G19670	Carubv10009755	CARHR020190	Thhalv10008201	771	819	2354	2674	831	920	869	688	2659	2202	1213	1154	540	549	1160	1652	893	1095	519	180	488	414	1706	1369	324	102	547	411	1621	897	466	114	522	375	1959	1784	432	235	399	159	930	340	520	119	408	213
AT1G19690	Carubv10012174	CARHR020210	Thhalv10008056	412	193	545	179	517	255	469	360	561	391	358	354	490	240	305	204	322	229	842	496	629	477	550	350	597	442	843	587	598	297	666	460	880	628	562	398	472	258	551	392	351	278	387	155	487	353
AT1G19700	Carubv10008805	CARHR020220	Thhalv10007267	572	616	732	651	2445	2388	445	319	663	479	928	1414	630	521	729	816	2200	1167	1172	317	361	452	3018	1976	820	365	393	448	1464	1284	897	412	486	372	2046	1432	655	627	594	679	2140	2701	552	282	603	518
AT1G19710	Carubv10011399	CARHR020230	Thhalv10007509	377	440	559	399	661	555	413	356	468	299	348	507	425	435	417	394	577	326	668	265	468	517	718	622	658	351	497	540	689	527	660	301	513	520	650	636	588	557	847	783	746	647	568	340	693	829
AT1G19720	Carubv10012347	CARHR020250	Thhalv10006756	1017	2380	1458	936	791	1051	501	369	765	190	374	1056	1124	2569	2117	1609	2085	540	2773	1200	460	1453	3515	1566	1132	926	942	939	1571	1062	1575	1183	1316	980	2491	1360	1709	1495	2032	1067	2278	1417	1109	1070	1111	478
AT1G19730	Carubv10010677	CARHR020260	Thhalv10009025	567	448	562	499	652	560	495	489	477	638	355	527	514	360	374	450	400	438	165	130	262	112	152	156	173	209	192	209	172	107	157	150	246	217	144	159	650	938	749	756	667	508	589	526	588	840
AT1G19770	Carubv10009375	CARHR020280	Thhalv10007873	2368	6755	3436	3080	939	2410	1962	3824	2621	2558	560	2657	2774	7407	3271	3575	1125	1582	833	13699	4439	2565	790	2600	796	13666	2023	2463	616	1802	1140	16364	1998	2918	669	1712	589	8820	1841	2450	522	2341	816	11551	1032	2164
AT1G19790	Carubv10009551	CARHR020300	Thhalv10009634	46	33	60	25	40	7	28	35	35	20	0	27	34	28	3	25	11	37	58	22	30	37	49	23	44	28	28	25	31	12	23	20	26	30	36	18	210	130	114	82	124	72	137	68	65	59
AT1G19800	Carubv10009585	CARHR020310	Thhalv10008071	972	784	1014	715	987	774	705	592	923	637	738	905	1143	864	893	811	1156	790	1087	580	905	681	935	683	964	578	744	735	901	609	922	564	792	662	1177	681	1316	1218	1519	1274	1057	874	1275	688	1210	1115
AT1G19830	Carubv10010680	CARHR020320	Thhalv10009412	19	18	20	7	16	4	7	6	11	9	11	14	10	13	8	9	9	7	10	2	13	3	27	18	8	3	5	0	14	3	18	12	9	4	13	7	1	0	3	0	10	0	2	0	2	0
AT1G19835	Carubv10008199	CARHR020330	Thhalv10006694	1266	1345	2665	1004	1300	1112	936	550	1599	565	1009	1121	1626	1476	2147	1591	2103	802	1531	538	1213	1713	2759	1209	1063	442	1265	1341	1488	1195	1253	460	1664	1337	1710	1195	1336	1401	2003	1277	1933	1670	1158	630	1512	777
AT1G19840	Carubv10010532	CARHR020340	Thhalv10009868	8	27	48	27	30	42	7	15	25	14	4	64	20	31	34	24	41	29	74	56	50	117	166	109	90	41	154	219	114	79	52	36	124	279	126	108	47	24	20	39	79	42	18	11	8	22
AT1G19850	Carubv10008258	CARHR020350	Thhalv10006748	760	738	887	780	680	735	519	615	838	650	518	848	685	888	528	635	502	543	687	493	190	586	497	423	417	614	514	556	337	301	416	474	643	678	405	401	541	706	689	643	800	800	361	416	384	469
AT1G19860	Carubv10009292	CARHR020360	Thhalv10007764	337	410	440	388	737	710	259	213	363	295	371	671	357	381	330	453	658	474	549	441	205	359	921	703	476	570	380	374	791	599	485	450	470	441	696	590	712	772	388	482	1514	1172	473	397	342	361
AT1G19870	Carubv10008346	CARHR020370	Thhalv10006839	2653	2556	2984	2268	2313	1924	2159	1679	2362	2112	1607	2025	2682	2284	2568	2521	2510	1624	2452	1081	732	1496	2091	1615	2293	996	1587	1777	1627	1071	2001	987	1865	1564	1921	1438	1452	1378	1556	1353	1765	1925	1247	758	1282	1030
AT1G19880	Carubv10011521	CARHR020380	Thhalv10007331	1741	1498	2270	1399	2372	1513	1925	1502	1949	1838	1913	1759	1664	1652	1523	1457	1742	1166	1647	1006	767	1369	1863	1465	1615	1280	1399	1303	1623	1107	1340	987	1421	1439	1567	1224	1503	1676	2094	1656	1914	1708	1221	978	1495	1352
AT1G19900	Carubv10012343	CARHR020390	Thhalv10007284	32	130	128	25	148	4	39	26	72	24	42	3	92	84	134	41	263	1	0	0	17	2	5	2	32	7	7	0	1	0	5	4	7	3	10	2	44	96	90	117	49	39	44	60	67	71
AT1G19910	Carubv10021055	CARHR020400	Thhalv10008949	5440	5970	7171	7788	8615	9007	6122	6004	5926	9213	6232	7398	5798	5048	4957	7184	6951	7058	1749	1262	2650	1416	1529	1676	1702	1091	1925	1795	1751	1376	1775	1200	1933	1861	1796	1774	2773	3906	3715	4030	3929	4112	2781	1969	3259	3859
AT1G19920	Carubv10009002	CARHR020410	Thhalv10007448	1623	1773	2440	1121	3767	2549	1484	1129	1902	1114	2443	2957	2235	1807	1920	1563	4489	2181	1767	635	1229	453	2257	1110	1436	653	699	443	2066	1055	1248	715	567	362	2392	1169	3337	2585	3070	1796	4152	2468	2559	1701	2453	1382
AT1G19940	Carubv10008868	CARHR020420	Thhalv10007364	19	33	43	7	34	25	15	9	41	6	31	22	40	34	24	11	38	15	108	86	126	59	163	70	105	82	141	79	150	63	141	97	103	56	184	71	146	155	232	93	136	57	112	127	157	42
AT1G19950	Carubv10009826	CARHR020430	Thhalv10008288	163	126	288	85	223	123	131	99	223	116	182	144	182	150	178	100	175	110	334	212	149	185	270	147	261	203	347	203	248	114	288	204	316	255	296	160	224	222	248	102	193	55	203	108	168	75
AT1G19970	Carubv10010001	CARHR020460	Thhalv10008458	148	152	220	87	339	241	75	154	196	178	228	220	137	161	102	80	138	139	86	59	209	159	218	186	105	79	214	155	312	148	130	59	182	173	241	174	87	78	109	72	305	179	84	58	91	71
AT1G19980	Carubv10010151	CARHR020470	Thhalv10008122	220	301	249	199	254	189	193	179	231	137	158	191	199	239	224	157	176	140	420	286	306	342	292	267	393	331	418	358	259	144	390	315	468	398	355	261	830	654	694	480	729	633	643	394	581	602
AT1G20020	Carubv10011511	CARHR020500	Thhalv10007988	7440	6930	34039	17661	5431	4766	6779	5846	30053	16133	3993	5741	8133	6613	34438	22316	4708	3284	30552	20130	22963	19762	25133	16377	16987	18420	24684	19228	18288	11616	22387	20291	23544	17519	26415	16101	9050	9369	30364	14023	7584	7376	9657	6204	22183	14431
AT1G20030	Carubv10011588	CARHR020510	Thhalv10008241	35	38	198	71	36	29	42	21	156	71	50	28	56	43	97	70	19	17	186	114	190	125	112	205	67	66	194	174	120	194	118	79	214	158	195	149	15	25	98	19	30	19	7	6	59	9
AT1G20050	Carubv10010245	CARHR020520	Thhalv10008732	1899	1589	2794	1918	2473	1986	2020	1750	2562	2022	1740	2194	1981	1470	1695	1884	1868	1813	1757	2288	2721	1819	1759	1882	2077	2009	2731	2443	2269	1551	1574	1856	2181	2257	1481	1772	1302	1630	2028	1847	1716	1854	1417	1140	1997	1713
AT1G20060	Carubv10008283	CARHR020530	Thhalv10006798	171	111	226	94	156	87	114	119	197	89	133	110	158	148	113	72	84	72	108	48	46	62	77	44	63	63	98	40	59	23	52	55	78	61	84	37	161	112	230	130	100	102	90	69	108	67
AT1G20070	Carubv10010355	CARHR020550	Thhalv10008606	168	146	116	55	608	316	176	59	74	20	153	302	210	132	75	34	446	247	185	276	71	145	587	594	181	214	99	95	421	536	201	301	82	114	351	409	334	391	77	144	1709	1069	235	94	155	85
AT1G20080	Carubv10011202	CARHR020560	Thhalv10007306	0	0	0	0	1	0	0	0	2	0	0	3	0	2	0	0	3	3	0	0	7	2	0	3	0	11	10	8	5	2	3	3	7	6	8	1	0	0	0	0	0	3	0	0	0	0
AT1G20090	Carubv10010350	CARHR020570	Thhalv10008827	2556	1908	2745	1827	2324	1841	2443	1778	2431	2091	1726	1888	3244	1977	2226	1586	2029	1374	2943	1291	1797	2011	2171	2317	2719	1354	2279	2470	2407	1858	2729	1399	2428	2152	2191	2115	2470	3110	2678	1839	2353	1952	2426	1615	2371	1732
AT1G20100	Carubv10009911	CARHR020580	Thhalv10008464	3060	2827	4680	3476	7001	5114	5905	5577	4362	7603	11181	4159	3334	2924	2573	2323	3140	3078	2605	3741	1691	1930	3960	5405	4940	4899	3166	3350	4806	3194	3210	3917	2939	2877	2659	3471	0	0	0	0	0	0	0	0	0	0
AT1G20110	Carubv10008630	CARHR020600	Thhalv10007122	1885	3106	2908	3150	2532	2796	2222	2591	2215	3430	1524	2373	2108	2781	2384	3288	2344	2299	2130	3537	1525	2141	2016	2868	2024	3305	1924	2429	1675	2375	1823	3070	2169	2092	1927	2765	3127	6168	4416	4782	5673	9150	3236	3616	3604	3869
AT1G20120	Carubv10012178	CARHR020610	Thhalv10007776	7	8	28	27	24	42	6	2	24	15	28	26	12	8	36	30	38	19	0	0	0	0	0	10	0	1	0	0	0	3	0	0	0	0	1	0	0	2	1	1	16	46	1	1	1	0
AT1G20130	Carubv10011073	CARHR020620	Thhalv10007885	0	1	6	3	4	0	0	0	0	0	0	2	2	2	2	1	3	6	0	0	0	0	0	0	1	0	0	0	0	0	0	0	0	0	0	0	1	3	0	0	1	0	0	0	1	0
AT1G20140	Carubv10010505	CARHR020650	Thhalv10008964	341	295	603	410	561	350	292	265	400	414	334	441	304	295	335	294	539	501	97	106	169	132	166	164	167	122	161	141	138	105	140	118	177	164	134	169	230	289	206	180	331	664	162	177	200	223
AT1G20150	Carubv10011271	CARHR020660	Thhalv10006858	11	2	5	0	14	5	0	1	0	0	0	8	4	9	2	0	6	3	1	2	0	0	1	0	0	1	0	1	0	0	0	0	0	0	0	0	3	5	5	0	9	7	4	1	0	1
AT1G20160	Carubv10008367	CARHR020670	Thhalv10006877	430	865	450	351	944	790	479	350	305	367	434	869	632	658	444	540	1097	649	56	97	111	256	311	241	115	89	115	159	167	120	154	48	124	239	224	113	134	116	201	63	292	386	87	64	60	94
AT1G20180	Carubv10009395	CARHR020680	Thhalv10007842	0	5	10	14	14	1	0	1	10	0	13	6	2	0	2	6	2	0	3	4	18	4	4	5	2	5	9	8	1	5	1	1	3	0	2	5	0	0	4	0	2	3	0	0	0	2
AT1G20190	Carubv10010090	CARHR020690	Thhalv10008566	524	275	373	151	717	366	452	216	296	165	497	634	619	230	249	249	473	351	419	169	1033	923	457	266	328	79	913	1272	349	241	320	120	973	1019	527	305	130	119	115	69	139	57	157	56	36	62
AT1G20200	Carubv10008972	CARHR020700	Thhalv10007479	1501	2064	2537	2364	2413	1872	1307	1206	1786	1973	1292	2193	1528	1819	1734	3019	2779	2085	1826	1479	2034	1915	1689	1527	2353	1535	1882	2074	1981	1432	1706	1368	1939	2015	1845	1482	2053	2064	2226	2099	2356	2417	1607	1114	1775	1687
AT1G20220	Carubv10009820	CARHR020710	Thhalv10008163	2906	2232	4124	1969	4608	2344	2631	2111	3341	2006	3278	3376	2945	2291	2177	2042	4068	2801	2279	1064	1083	1316	3463	2680	3358	2056	1713	1713	3885	1819	2139	1402	1442	1726	2917	2285	1364	1305	1053	685	1460	1066	1078	783	895	557
AT1G20225	Carubv10010092	CARHR020720	Thhalv10010046	978	1055	1267	1279	1277	1505	1142	987	1080	1399	937	1088	1067	892	1048	1406	1212	1167	1272	739	1418	1284	882	1094	1348	847	1204	1679	1019	866	1238	695	1500	1446	1147	1058	1177	1447	2033	1843	1745	1440	1571	866	2016	1609
AT1G20230	Carubv10008385	CARHR020730	Thhalv10009574	77	84	211	89	74	78	46	40	141	40	86	75	89	72	140	134	146	61	92	74	78	102	149	72	133	76	87	71	115	56	90	79	115	78	112	99	76	121	171	98	147	98	95	71	133	80
AT1G20300	Carubv10011494	CARHR020780	Thhalv10007329	352	589	656	398	703	554	287	408	505	451	327	503	372	519	416	458	742	467	299	294	227	310	412	271	278	372	348	309	355	183	312	302	388	334	299	239	833	929	847	556	1012	871	505	541	646	524
AT1G20310	Carubv10010139	CARHR020790	Thhalv10009337	7	107	38	84	83	189	3	49	15	33	9	74	1	128	13	100	41	121	1	262	33	27	8	55	22	309	20	56	11	26	1	273	22	56	10	39	0	45	0	15	11	28	5	38	6	9
AT1G20330	Carubv10011566	CARHR020800	Thhalv10008036	3842	3430	4501	2481	4979	3959	2905	2353	3370	2153	2514	3951	4214	3423	3143	2844	4221	3437	1989	2872	1527	1986	1911	1976	1521	2144	1892	1591	1706	1740	1784	2181	1940	1661	2050	2303	3217	4330	5655	5688	4560	5663	3758	2406	4451	4725
AT1G20340	Carubv10012022	CARHR020810	Thhalv10008749	47554	54787	35609	21627	32486	27053	45720	33802	34963	17885	19212	29707	53835	51905	34644	31934	31056	31810	84962	44604	67740	29525	45831	26687	30544	24608	45981	25787	31157	22379	55531	36633	49115	28574	58883	32641	43327	49581	46282	20826	24410	12990	53341	24855	32300	20157
AT1G20350	Carubv10010213	CARHR020820	Thhalv10008738	18	144	24	35	50	66	51	115	16	30	34	67	16	148	37	57	58	51	11	15	11	25	21	13	2	11	20	11	7	5	18	22	23	18	9	10	842	795	918	231	545	426	478	402	534	192
AT1G20370	Carubv10008701	CARHR020830	Thhalv10007295	407	412	837	449	872	477	342	308	675	446	374	641	628	496	652	534	1083	544	692	277	663	634	1256	763	608	436	643	515	856	551	708	326	637	535	769	661	884	702	976	678	1048	897	686	408	743	597
AT1G20380	Carubv10008428	CARHR020850	Thhalv10006924	268	227	425	158	421	303	224	186	268	138	242	354	366	262	245	232	493	227	227	139	163	174	236	270	353	173	157	278	228	198	224	100	169	148	188	180	329	510	308	375	861	1152	195	366	212	258
AT1G20410	Carubv10008914	CARHR020860	Thhalv10007426	415	330	770	449	552	343	314	282	628	408	378	456	436	333	571	442	468	265	414	197	379	368	478	354	408	261	460	378	395	226	429	225	459	398	339	292	585	449	583	409	502	428	505	305	500	390
AT1G20430	Carubv10011343	CARHR020890	Thhalv10009140	1215	665	1410	886	1695	1090	1677	1169	1285	1479	1604	1098	1388	716	795	652	1048	979	188	89	339	138	150	145	214	143	204	256	163	186	192	101	276	256	142	157	723	941	540	445	768	938	593	520	493	420
AT1G20450	Carubv10010037	CARHR020900	Thhalv10008313	2437	3256	3000	868	3553	946	4038	2381	2384	1248	3952	1353	2505	2792	1942	1048	3141	1046	1115	1673	1570	872	1817	982	1331	1618	2463	1291	1764	525	1713	1308	1782	1297	2070	1604	5497	6336	16486	4986	7526	11602	6014	4063	13215	4674
AT1G20460	Carubv10010710	CARHR020910	Thhalv10009165	138	279	279	323	174	222	97	171	212	155	57	218	150	275	264	270	211	168	260	287	259	224	215	326	358	414	325	270	275	179	228	291	309	290	224	239	192	335	177	223	269	386	162	237	152	255
AT1G20470	Carubv10011671	CARHR020920	Thhalv10009034	64	22	21	4	80	57	60	21	10	12	64	45	58	28	18	18	72	73	53	63	29	29	97	83	120	72	23	47	53	52	155	72	40	30	128	88	29	46	31	11	49	49	29	42	11	14
AT1G20480	Carubv10008735	CARHR020930	Thhalv10007257	127	150	144	74	54	44	99	70	101	89	42	60	153	173	86	91	59	37	440	816	227	584	225	313	391	771	536	539	227	236	400	711	645	552	313	297	171	220	225	130	160	112	131	118	160	120
AT1G20510	Carubv10008763	CARHR020980	Thhalv10007270	435	2963	1287	1854	773	1752	608	1623	1047	1257	687	1534	389	2315	712	1520	812	1130	105	1169	289	225	133	316	132	1049	306	261	150	143	160	789	222	238	155	213	556	3641	810	709	1715	3865	532	2577	580	611
AT1G20520	Carubv10012650	CARHR020990	Thhalv10008670	2	5	10	3	3	2	0	0	2	13	0	6	8	1	2	5	2	1	9	14	10	5	0	2	5	11	5	3	0	2	2	7	1	4	0	2	2	6	0	0	5	1	0	1	3	0
AT1G20530	Carubv10008623	CARHR021000	Thhalv10007083	50	32	92	80	23	53	52	34	73	47	56	39	52	38	75	88	57	23	126	60	27	117	120	114	102	75	124	94	96	49	81	48	132	147	96	70	35	13	40	32	23	16	21	13	16	34
AT1G20550	Carubv10008720	CARHR021020	Thhalv10007203	172	137	271	159	176	167	155	107	194	126	140	173	172	141	241	176	173	68	410	481	440	345	352	326	544	508	521	437	306	202	358	450	399	388	352	322	237	340	382	259	305	377	238	202	344	322
AT1G20560	Carubv10011463	CARHR021030	Thhalv10007137	800	768	1404	1077	1045	742	593	542	1028	832	559	909	935	768	1158	1152	1152	678	1027	344	486	726	927	586	540	283	568	613	605	413	779	299	697	443	982	673	847	517	1493	1204	827	745	806	388	1179	1121
AT1G20575	Carubv10010118	CARHR021040	Thhalv10008599	644	814	921	969	804	761	799	832	758	1018	706	764	847	785	760	821	794	663	668	686	869	723	554	819	1176	857	714	928	741	584	790	642	771	843	643	656	699	811	687	822	844	839	620	513	653	907
AT1G20580	Carubv10010633	CARHR021050	Thhalv10009078	2575	1758	3253	1833	3238	1986	3098	2613	3088	2923	2818	2241	2797	1578	1890	1716	2350	2135	2607	1852	2347	1642	2695	2377	3620	2360	2791	2591	3455	1599	2661	2056	2541	2575	2477	2383	1040	1067	1129	788	978	695	1008	657	955	665
AT1G20610	Carubv10009205	CARHR021060	Thhalv10007704	271	241	401	117	164	42	213	203	383	127	50	114	350	297	241	112	110	52	344	200	181	139	185	86	211	228	283	111	197	65	196	190	250	190	123	84	320	270	188	155	158	93	185	159	168	99
AT1G20620	Carubv10012481	CARHR021080	Thhalv10007795	16523	18829	28997	20052	9433	6630	18181	11693	24524	19497	6700	11132	13816	14472	22802	26690	8969	7279	24366	12205	46497	79558	8283	9593	13108	7233	48973	40999	5056	8750	17528	9088	73423	44229	11041	12362	9576	13201	54367	50140	12995	19231	14874	7036	36814	38312
AT1G20640	Carubv10008300	CARHR021100	Thhalv10006790	852	1208	908	646	876	1224	553	732	657	510	597	1001	796	965	499	560	1010	728	1411	642	378	711	1616	1179	800	494	747	806	1040	809	1067	602	723	641	1537	913	496	719	410	238	1011	849	423	306	275	179
AT1G20650	Carubv10011749	CARHR021110	Thhalv10007921	992	588	651	301	936	705	740	488	538	331	782	928	1007	612	569	460	981	469	1218	358	944	844	668	424	716	207	1055	872	620	341	998	363	1047	710	845	473	1514	1628	1333	1113	912	743	1870	704	997	1085
AT1G20670	Carubv10008487	CARHR021120	Thhalv10007011	785	844	928	818	792	641	881	879	819	1064	733	645	755	868	798	785	692	492	683	525	296	613	699	600	530	498	586	558	520	472	509	540	637	538	541	463	680	758	837	664	739	803	595	447	549	507
AT1G20693	Carubv10010586	CARHR021130	Thhalv10009970	2817	2451	9991	10097	5124	5441	3149	2531	8360	9986	2437	4778	2498	1867	6274	8445	2736	3022	2853	2019	14263	11216	4256	6342	3156	2100	13795	13209	3390	4057	2890	2112	13874	11135	2765	4545	4539	6188	10612	10624	9613	15367	4739	3208	9604	12694
AT1G20700	Carubv10010349	CARHR021150	Thhalv10008824	77	55	61	33	67	24	42	36	42	51	20	48	26	39	24	29	17	31	67	128	207	197	90	155	76	88	185	221	66	57	82	123	219	214	86	105	12	32	41	36	27	20	16	15	25	26
AT1G20720	Carubv10008105	CARHR021170	Thhalv10006615	149	78	214	112	228	65	84	45	188	49	120	180	138	108	143	118	162	74	307	75	132	125	296	131	165	124	216	148	262	96	146	107	167	106	178	115	119	85	187	106	159	58	53	46	161	46
AT1G20760	Carubv10008174	CARHR021200	Thhalv10006674	1447	2249	2090	1856	1210	1204	1200	1443	1535	1446	878	1258	1389	2055	1985	2165	1534	992	1518	1467	823	1319	1399	1079	1110	1305	1057	1083	1069	1078	1187	1207	1405	1134	1318	1135	1691	2373	2344	2123	2199	2685	1489	1470	1580	1526
AT1G20770	Carubv10010125	CARHR021210	Thhalv10008759	613	715	1068	926	860	817	624	564	809	775	636	857	727	675	797	776	915	684	768	988	878	744	665	766	867	1086	849	944	630	530	741	913	973	837	562	686	397	659	445	508	606	704	340	382	499	524
AT1G20780	Carubv10008332	CARHR021220	Thhalv10006866	765	2396	1540	2520	1006	2116	754	1355	1114	1460	538	1649	863	2171	1554	2397	1236	1356	2310	5304	1581	2346	1665	2748	2082	4491	2415	2252	1401	2157	1940	5003	2560	2046	1607	2435	1710	3885	2729	2616	2224	4135	1533	1970	2381	1939
AT1G20810	Carubv10010195	CARHR021230	Thhalv10008601	1352	1006	1311	790	1194	877	1506	1180	1167	1080	1061	870	1405	883	1146	913	835	635	2563	1776	1876	1277	1529	1239	2222	1773	2064	1569	1333	768	1895	1581	1991	1634	2010	1183	825	850	1149	589	537	407	997	556	839	651
AT1G20816	Carubv10010488	CARHR021240	Thhalv10008937	368	432	445	238	509	420	469	397	355	312	347	386	454	363	316	268	461	303	428	365	423	193	389	446	511	394	347	271	396	299	360	414	410	296	431	394	333	234	251	186	308	179	269	145	222	230
AT1G20823	Carubv10010177	CARHR021250	Thhalv10009964	105	148	113	23	275	151	78	61	67	3	174	204	92	128	45	30	235	166	41	58	12	23	176	209	39	53	5	23	76	131	37	44	16	14	78	86	95	188	35	23	221	223	69	89	32	11
AT1G20830	Carubv10009608	CARHR021260	Thhalv10007995	451	381	610	352	582	463	598	434	527	575	560	548	699	395	489	512	582	428	863	473	639	493	726	619	877	599	635	630	714	439	743	546	683	663	820	639	577	601	689	548	542	537	616	327	546	598
AT1G20840	Carubv10008415	CARHR021270	Thhalv10006916	902	1833	4569	3647	1085	822	866	828	3228	2178	683	1129	1060	1505	4446	5534	1301	715	1262	1273	957	1835	1685	1264	1046	1123	1209	1238	953	1345	1345	1162	1342	1195	1359	1160	580	708	1844	1617	720	420	548	404	1685	1296
AT1G20850	Carubv10009557	CARHR021280	Thhalv10008032	365	1356	972	497	1018	552	732	730	840	447	387	373	692	1220	858	702	1192	482	198	559	630	307	535	379	245	447	336	159	265	153	345	385	338	237	452	196	235	851	742	697	499	542	488	359	299	435
AT1G20860	Carubv10011524	CARHR021290	Thhalv10009424	0	5	0	1	0	1	0	0	1	0	0	0	0	1	1	0	0	4	0	1	6	7	19	11	14	1	2	1	2	12	5	3	2	6	17	6	2	3	2	1	16	13	2	2	3	2
AT1G20870	Carubv10009051	CARHR021300	Thhalv10007660	56	23	84	28	82	62	57	21	51	39	66	54	51	49	47	40	94	46	18	11	9	6	18	20	6	8	11	4	21	4	6	3	12	6	16	9	28	12	8	19	14	9	22	1	5	2
AT1G20880	Carubv10009992	CARHR021310	Thhalv10008444	419	684	522	750	321	458	397	283	438	613	216	360	484	513	550	696	349	296	828	661	435	834	508	807	895	637	798	1017	339	451	811	544	887	871	581	601	545	870	706	884	600	1123	526	509	547	734
AT1G20890	Carubv10010341	CARHR021320	Thhalv10008823	337	351	397	456	361	316	423	347	360	473	374	314	394	278	393	415	257	253	492	404	368	375	284	390	725	419	531	575	440	330	629	337	658	737	413	501	234	209	178	175	165	118	184	111	170	187
AT1G20900	Carubv10009773	CARHR021330	Thhalv10008220	489	655	734	622	486	401	493	618	545	689	424	469	541	575	529	610	343	392	275	414	256	381	268	416	310	359	272	365	318	330	242	335	309	447	281	399	489	639	362	397	370	526	406	254	240	375
AT1G20920	Carubv10008128	CARHR021350	Thhalv10006608	4944	3445	4483	3727	3689	2805	5907	5308	3662	6085	4033	2751	4870	3120	3874	3218	3198	2244	4323	4032	1191	2787	3859	3897	6293	4575	3426	4002	3403	2054	4055	4014	3786	3687	3753	4284	3126	3929	3129	2493	4996	6500	2363	2488	2422	2714
AT1G20925	Carubv10012230	CARHR021390	Thhalv10009415	10	6	2	6	17	5	2	7	7	16	0	7	7	6	5	7	11	7	0	0	0	0	0	2	0	0	0	0	0	0	0	0	0	0	0	0	0	0	0	0	0	0	0	0	0	0
AT1G20930	Carubv10009794	CARHR021400	Thhalv10008253	338	301	477	143	262	153	268	286	431	224	258	189	269	314	213	134	148	187	280	192	451	154	166	106	201	191	322	145	182	119	199	141	323	200	226	153	115	74	137	51	44	20	88	52	80	46
AT1G20950	Carubv10008559	CARHR021410	Thhalv10007087	1785	1786	2793	957	3460	1846	1759	1074	2221	1064	2125	2323	1891	1875	1752	1253	3969	1625	3123	1797	2828	1844	3083	2120	2909	1880	2617	1916	3020	1590	2729	1693	2127	1893	3421	1928	2527	2310	2786	1752	2048	1428	1721	1436	1942	1177
AT1G20960	Carubv10008066	CARHR021420	Thhalv10006525	3346	5037	7261	5168	5255	3779	3159	2583	4537	3716	2866	3894	3449	5249	6394	7648	7355	3149	4350	2083	2034	4735	5663	3260	3149	2273	3349	3228	3218	2572	3269	2166	4253	3517	4063	3428	5971	4492	8283	5404	7264	7033	3983	2378	5410	3494
AT1G20970	Carubv10008095	CARHR021430	Thhalv10006715	2396	3650	3798	5436	2907	4021	3103	2636	3107	4853	2929	3174	2959	3510	3772	5253	3155	2292	1802	1930	1000	1697	1883	1844	2761	2363	2158	2776	2055	1212	1749	1765	1750	1813	1703	1819	3081	4290	3804	3394	3448	3986	2706	3055	3466	2931
AT1G20980	Carubv10012577	CARHR021440	Thhalv10006656	1467	4764	3433	3732	1886	2549	1097	1698	2182	1602	1022	2314	1519	4437	3538	4369	2981	1670	1600	2118	1018	2315	2011	1736	719	1931	1351	1218	1009	1558	1429	2230	1601	1111	1576	1551	2439	3475	3545	3095	3400	4715	1894	2180	2705	2195
AT1G20990	Carubv10009771	CARHR021450	Thhalv10008443	16	16	19	4	16	9	8	6	16	3	16	9	3	19	9	7	15	10	5	2	1	5	2	2	0	6	3	2	1	0	7	4	2	5	8	2	13	14	24	3	15	17	3	5	3	4
AT1G21000	Carubv10009696	CARHR021470	Thhalv10008598	1329	2472	2496	3661	1488	2587	957	1455	1880	2945	663	1911	1267	1605	1857	3117	1363	1621	1393	2438	2943	2011	1623	2833	1337	1757	1206	1967	1091	1646	1394	1885	1123	1366	1205	2406	1047	1923	1796	2786	1736	2253	1234	975	1766	2412
AT1G21010	Carubv10009886	CARHR021480	Thhalv10008766	202	1253	210	348	232	692	118	510	152	158	116	422	185	1044	141	320	181	389	1266	2237	1097	841	786	592	547	1761	618	1027	487	661	1075	2421	593	1079	750	672	161	954	219	296	379	510	149	668	205	228
AT1G21050	Carubv10010083	CARHR021490	Thhalv10008568	541	893	491	396	1037	1135	497	694	455	406	608	1137	575	617	383	480	822	1072	595	620	443	373	696	755	555	480	355	360	505	477	643	472	457	472	746	745	362	398	313	270	539	353	458	176	261	233
AT1G21060	Carubv10012153	CARHR021500	Thhalv10007437	493	442	634	505	644	754	403	328	535	429	420	841	504	463	559	517	856	527	1017	263	749	826	796	605	949	259	829	826	669	602	1045	243	939	759	1045	795	861	345	666	379	746	333	878	152	547	359
AT1G21065	Carubv10011090	CARHR021510	Thhalv10008709	2050	1891	1944	1385	2062	1810	2522	2008	1905	1954	1702	1739	2257	1802	1602	1556	1629	1582	2966	2013	2074	1574	2586	2313	2571	1820	2089	2035	2534	1672	2816	1904	2590	2005	3261	2428	1056	1207	1103	881	1225	1045	1210	709	930	1001
AT1G21070	Carubv10009605	CARHR021520	Thhalv10008081	282	443	355	244	371	241	335	377	366	247	222	260	336	539	240	164	280	158	1974	628	412	362	389	377	1463	736	570	409	424	246	1510	605	682	451	831	483	254	311	186	75	232	132	207	184	129	98
AT1G21080	Carubv10009386	CARHR021530	Thhalv10007857	741	2331	1426	1766	1383	1549	592	1146	1163	1131	930	1466	1028	2182	1280	1715	1624	1227	2526	4159	1150	2086	2091	3004	3021	4789	2520	2716	2121	1925	2409	4002	2618	2561	2199	2588	1103	2212	1369	1357	1973	2803	1000	1554	986	1062
AT1G21090	Carubv10010147	CARHR021560	Thhalv10008611	391	137	419	100	394	127	295	234	474	234	455	293	344	168	165	78	150	199	300	110	130	172	416	246	232	136	224	131	369	227	200	79	277	217	315	193	270	225	274	149	339	160	205	136	151	117
AT1G21150	Carubv10011358	CARHR021600	Thhalv10006396	85	69	152	51	121	50	115	83	121	49	69	74	115	76	58	56	73	59	369	96	396	252	393	204	251	95	258	196	328	193	281	87	409	308	361	254	261	197	204	128	326	194	228	111	166	105
AT1G21160	Carubv10008185	CARHR021610	Thhalv10006634	1327	1244	1592	1687	1608	1496	1431	1205	1119	2041	1657	1314	1168	1218	1427	1581	1348	835	54	59	35	66	171	148	41	78	63	67	81	107	64	66	81	56	89	110	641	1503	484	362	1046	1567	423	1216	375	359
AT1G21200	Carubv10009151	CARHR021650	Thhalv10010018	296	714	428	454	380	447	256	448	418	411	301	445	331	523	348	393	447	328	521	584	294	413	767	560	374	592	412	394	595	418	468	622	509	364	617	560	4	4	6	3	10	10	0	2	1	1
AT1G21280	Carubv10006150	CARHR217380	Thhalv10009460	255	299	292	190	308	303	168	226	248	209	152	297	275	319	158	197	250	247	0	0	0	0	0	0	0	0	0	0	0	0	0	0	0	0	0	0	0	0	0	0	0	0	0	0	0	0
AT1G21310	Carubv10009850	CARHR021700	Thhalv10018812	12714	37999	42165	68329	21474	86371	8660	9061	23176	27137	13850	49981	9985	18286	24694	77881	23596	38685	10857	14386	21342	23584	29509	18949	19647	16918	17241	16324	14774	13083	15466	19825	17805	20728	23641	12314	11969	20705	12968	14914	20130	37618	4842	9084	5275	11547
AT1G21326	Carubv10010842	CARHR021710	Thhalv10008673	25	138	67	101	37	81	27	66	71	97	3	107	35	180	62	118	26	73	1	284	24	42	2	24	2	240	36	57	2	21	6	331	63	79	3	18	13	205	45	27	31	40	27	171	31	35
AT1G21327	Carubv10011367	CARHR021720	Thhalv10009360	0	0	0	0	0	0	0	0	0	0	0	0	0	0	0	0	0	0	0	0	0	0	3	0	0	0	1	0	0	0	0	0	0	0	0	0	0	0	0	0	0	0	0	0	0	0
AT1G21340	Carubv10011507	CARHR021730	Thhalv10009737	2	2	6	2	5	4	0	0	2	0	6	8	2	2	1	0	0	6	4	0	6	5	2	5	5	3	9	5	3	2	1	1	5	1	3	6	1	12	4	0	7	2	1	2	1	0
AT1G21350	Carubv10012470	CARHR021740	Thhalv10008558	1407	1046	1208	599	1040	738	1112	1019	1095	702	812	770	1352	924	981	713	857	634	341	196	203	175	222	119	175	186	263	172	189	85	197	150	348	165	286	152	682	727	708	247	381	198	680	372	480	222
AT1G21360	Carubv10010234	CARHR021750	Thhalv10008571	64	84	128	70	71	16	73	54	90	85	31	28	96	36	137	79	41	17	20	13	97	20	86	37	104	34	46	11	65	28	68	25	42	17	82	38	66	109	189	65	189	115	150	71	128	143
AT1G21370	Carubv10011688	CARHR021760	Thhalv10008107	369	1056	629	799	528	727	405	675	502	639	156	610	555	946	540	767	478	573	529	589	463	407	328	353	501	617	386	344	378	350	459	539	402	422	440	521	357	631	367	581	541	784	338	356	418	449
AT1G21380	Carubv10011646	CARHR021770	Thhalv10007405	792	2726	1644	2099	1523	2256	865	1694	1425	1622	1012	1845	920	2170	1460	2179	1845	1508	1372	2860	2372	2522	1594	2324	1461	2862	2072	2163	1274	2477	1537	2521	2119	2005	1464	2004	1882	3762	2598	3467	3552	7618	1546	2594	2249	2712
AT1G21390	Carubv10010005	CARHR021780	Thhalv10008635	142	203	394	448	217	348	197	139	261	384	124	380	188	203	276	323	174	168	103	131	543	334	157	213	154	175	434	603	124	177	143	150	423	390	98	149	358	580	591	855	747	1298	270	271	559	820
AT1G21400	Carubv10009022	CARHR021790	Thhalv10007543	2242	4610	3826	10690	1698	2060	2231	3707	3663	13747	714	2156	2581	2814	6589	14686	1401	1307	509	882	1797	2328	259	618	563	564	1250	2614	176	318	786	872	1712	1771	263	363	1175	4096	6323	7220	817	1612	1701	1930	3984	8124
AT1G21410	Carubv10009531	CARHR021800	Thhalv10008012	202	170	250	401	441	290	160	112	218	207	144	283	322	149	244	512	421	285	392	235	517	751	287	331	333	248	389	946	202	203	410	292	423	484	365	381	577	557	457	902	1343	1155	648	242	350	912
AT1G21430	Carubv10011440	CARHR021810	Thhalv10009764	0	0	0	0	0	0	0	0	0	0	0	0	0	0	0	0	0	0	0	0	0	0	0	0	0	0	0	0	0	0	0	0	2	0	0	0	0	0	0	0	0	0	0	0	0	0
AT1G21440	Carubv10009659	CARHR021820	Thhalv10008020	1060	980	1543	440	1444	778	1019	869	1335	430	898	980	905	744	727	489	829	653	505	385	772	359	428	269	411	442	539	346	336	190	500	288	580	375	460	251	3235	4415	3528	2990	977	1013	3376	1584	2342	4076
AT1G21450	Carubv10008658	CARHR021830	Thhalv10007142	966	2617	1420	2697	1224	2040	915	1594	1126	1610	795	1654	882	2284	1414	2766	1336	1318	1045	1833	1699	1600	1235	1550	722	1973	1025	1395	742	1172	818	2113	1210	1358	1254	1469	721	2093	1429	1869	1356	2860	688	1466	943	1591
AT1G21460	Carubv10010111	CARHR021840	Thhalv10008590	651	405	996	683	2505	1982	804	461	1087	1201	1200	1544	696	383	721	677	1460	1073	1518	526	1880	1622	3790	3325	1802	591	1327	1744	2507	2350	1588	722	1012	1139	2929	2663	2087	1415	2900	2695	2541	1572	2836	702	2292	3187
AT1G21480	Carubv10009077	CARHR021850	Thhalv10007584	421	254	538	295	295	246	303	295	454	335	244	302	412	287	337	337	245	171	559	357	335	542	363	388	634	434	526	627	400	359	547	362	616	540	467	412	988	801	984	898	901	993	826	414	722	753
AT1G21500	Carubv10010636	CARHR021860	Thhalv10009074	7727	4011	1781	716	2906	1890	9228	5627	1870	1221	4344	2574	7516	4084	1190	748	1809	1984	10960	6926	1787	1208	2873	2231	5648	4442	3025	1653	2537	1155	7074	5239	2970	1935	5573	2406	2786	3221	2272	985	1222	433	3323	1568	1334	1117
AT1G21510	Carubv10009703	CARHR021870	Thhalv10009526	14	15	23	2	7	15	3	7	24	0	11	7	10	13	3	6	6	3	23	19	42	19	43	10	23	28	33	4	58	23	20	35	16	6	23	12	16	13	34	6	5	2	7	17	18	7
AT1G21528	Carubv10011926	CARHR021900	Thhalv10009273	12	7	14	6	3	4	1	1	6	13	0	1	0	2	4	2	3	3	17	55	18	10	6	7	16	36	11	5	1	0	22	37	12	9	5	10	8	5	9	1	6	6	5	11	4	4
AT1G21540	Carubv10008762	CARHR021910	Thhalv10007282	183	260	298	137	228	72	223	178	213	220	40	65	213	285	208	185	92	83	203	237	103	216	245	204	232	237	245	241	157	126	259	249	268	233	166	148	219	939	560	369	572	735	276	508	388	370
AT1G21550	Carubv10011559	CARHR021920	Thhalv10008998	69	218	129	195	164	345	33	76	78	70	41	170	39	131	113	99	281	233	1077	6157	1706	1293	711	3019	989	4123	773	1590	1212	2973	910	4071	735	1254	838	2543	1615	10511	988	2013	2093	4277	1673	8601	1533	1222
AT1G21560	Carubv10011723	CARHR021930	Thhalv10007934	669	321	683	272	543	326	460	369	632	313	354	567	701	405	503	317	476	285	462	227	583	317	317	217	248	202	469	329	249	143	365	241	514	440	307	203	1515	2091	1402	1430	1886	1901	1241	1256	1400	1331
AT1G21580	Carubv10011226	CARHR021940	Thhalv10006523	2091	4147	3020	2960	2056	2217	1626	1745	2182	1767	1488	1991	1903	3601	3194	3155	2842	1379	2832	2122	625	2969	2264	1646	1360	2217	1599	1791	917	1092	1663	1962	2270	1984	1955	1474	1856	3418	1660	1571	2451	2911	1209	1887	1304	1237
AT1G21590	Carubv10011454	CARHR021950	Thhalv10006893	992	2338	1303	1721	1713	3222	916	1386	1080	1307	1071	2380	950	1700	1058	2091	1705	1312	452	2777	1237	1502	1183	1895	372	2397	858	1226	613	1263	452	2820	994	1132	702	1243	422	1495	628	1118	931	1945	425	988	504	1088
AT1G21600	Carubv10009718	CARHR021960	Thhalv10007813	1435	1021	5425	3271	1978	1156	1601	1059	5043	3571	1306	1359	2122	1208	4907	3911	1688	1045	1459	606	3608	3528	1033	827	1459	752	5157	4157	1343	651	1264	779	5434	4190	1087	1014	1466	1223	3270	1538	1409	775	1398	661	2345	1473
AT1G21630	Carubv10008122	CARHR021980	Thhalv10006584	1794	3222	2927	2693	1955	1925	1330	1257	1847	1478	1045	1775	1855	3111	2836	3222	2893	1399	2606	2088	1112	2054	2359	1900	2044	2041	1680	1646	1857	1814	2203	1858	1867	1561	2254	1888	2668	3617	3480	3266	3934	4304	2086	2023	2480	1885
AT1G21640	Carubv10008203	CARHR021990	Thhalv10006690	1170	1964	1933	2169	1749	2220	1108	998	1434	1237	770	2124	1494	2100	2383	3438	2615	1404	2643	856	1417	3916	1692	1751	1242	800	2387	2644	908	1474	2075	1242	3083	2272	2185	1831	1010	884	3326	2374	1467	1516	1197	627	2534	1973
AT1G21650	Carubv10011823	CARHR022000	Thhalv10006535	316	467	1426	612	563	348	297	292	994	504	236	349	382	554	1400	998	585	233	1873	938	864	1209	2133	1210	1136	1092	1231	1104	1152	812	1542	1301	1527	1044	1449	1058	2249	2637	3305	1903	1594	1314	1875	1776	2474	1776
AT1G21660	Carubv10008781	CARHR022010	Thhalv10007304	904	1376	1329	1074	1847	1468	849	945	1149	878	1123	1503	1048	1303	1181	1127	1903	1119	1737	1475	771	1309	2572	2068	1709	1317	1370	1269	2095	1399	1433	1398	1305	1222	2110	1583	1210	2256	2408	1888	1602	2134	1178	1591	2157	1662
AT1G21680	Carubv10011878	CARHR022030	Thhalv10009943	703	1126	4667	3965	1348	920	732	617	3837	2658	442	844	589	932	7045	6551	1294	632	1710	360	956	2202	2470	1274	777	244	1579	1512	1363	1335	1217	304	1785	1259	3100	1809	1353	1931	5602	5356	2150	3918	1708	820	3636	5019
AT1G21690	Carubv10010906	CARHR022040	Thhalv10008129	692	566	1010	641	855	518	769	659	1007	752	623	687	821	640	722	750	594	446	540	309	500	305	495	410	597	462	463	428	621	357	444	359	389	317	519	380	492	601	664	605	269	229	372	303	456	701
AT1G21695	Carubv10010273	CARHR022050	Thhalv10009307	10	9	13	18	20	29	10	10	14	12	9	21	13	12	5	13	19	22	15	22	13	19	33	20	6	14	23	32	23	33	15	36	25	16	23	35	2	1	0	0	0	1	0	4	0	0
AT1G21700	Carubv10012527	CARHR022060	Thhalv10006819	735	1305	1241	908	883	786	642	701	915	609	653	884	810	1208	961	1098	1153	631	1037	809	450	965	1025	890	838	891	791	860	841	793	854	800	865	769	993	832	1549	1913	1874	1501	1928	2096	1151	1043	1324	1159
AT1G21710	Carubv10009521	CARHR022070	Thhalv10008051	450	464	543	395	387	290	373	318	429	357	145	337	497	420	425	388	375	276	505	321	534	353	336	269	403	333	425	346	336	256	469	341	503	383	386	318	244	215	251	179	257	228	197	95	198	175
AT1G21722	Carubv10012612	CARHR022100	Thhalv10008678	0	0	0	0	0	0	0	0	0	0	0	0	0	0	0	1	0	0	0	0	3	0	0	2	0	1	2	1	0	0	1	0	2	2	0	1	1	1	0	1	0	4	2	0	0	3
AT1G21730	Carubv10008234	CARHR022110	Thhalv10006746	759	605	997	613	652	442	623	421	830	568	438	556	840	587	907	618	605	329	955	410	640	1074	587	524	795	368	953	930	467	355	918	430	1149	963	598	469	583	581	779	434	389	287	568	296	513	370
AT1G21740	Carubv10008218	CARHR022130	Thhalv10006728	454	178	490	141	330	197	248	254	423	161	152	285	402	294	257	143	254	225	337	103	55	161	367	220	288	213	172	162	296	166	197	119	168	184	252	156	389	413	367	286	493	316	308	217	264	247
AT1G21750	Carubv10008920	CARHR022140	Thhalv10007438	4241	5353	8134	11319	6250	6498	5159	4140	6809	9900	5380	7023	4256	4259	4368	9661	6517	5747	6675	9604	10278	10335	4157	6056	12864	10231	14090	13810	6802	5871	6104	4915	10197	9905	4548	6076	9057	12046	8386	14996	6905	8670	6598	6678	8297	7339
AT1G21760	Carubv10011906	CARHR022150	Thhalv10008543	779	1008	954	1037	798	823	672	695	739	1072	522	869	782	708	817	942	782	756	857	631	768	778	493	660	634	605	755	815	409	454	757	547	930	721	697	665	637	788	698	618	850	1062	661	540	551	611
AT1G21780	Carubv10012555	CARHR022160	Thhalv10008190	995	940	1422	1644	995	1061	942	969	1283	1628	804	1040	1004	830	1325	1515	833	852	624	403	550	955	566	724	517	337	725	1031	458	474	567	449	882	938	611	643	486	481	709	695	619	675	557	263	561	764
AT1G21790	Carubv10009734	CARHR022170	Thhalv10008385	286	263	217	198	177	151	321	211	223	178	138	154	260	197	198	214	151	131	46	52	77	56	40	46	63	64	55	72	68	35	47	53	58	57	51	50	108	158	88	79	140	110	114	90	64	70
AT1G21830	Carubv10010313	CARHR022190	Thhalv10008805	889	1268	980	1127	602	703	869	935	968	1245	371	666	1000	1089	1100	1287	504	566	753	1344	552	863	514	687	459	856	632	664	327	512	654	1011	673	580	523	576	372	722	402	320	374	402	390	362	288	344
AT1G21840	Carubv10010129	CARHR022120	Thhalv10009605	248	212	186	149	147	147	193	183	155	135	103	159	233	220	127	127	142	104	649	467	992	701	553	607	426	375	685	679	464	516	558	395	751	630	541	597	163	268	157	181	169	232	118	126	129	153
AT1G21866	Carubv10011775	CARHR176330	Thhalv10023052	0	0	0	0	0	0	0	0	0	0	0	0	0	0	0	1	0	0	0	0	0	0	0	0	0	0	0	0	0	0	0	0	0	0	0	0	0	0	0	0	0	0	0	0	0	0
AT1G21880	Carubv10009262	CARHR022230	Thhalv10007751	812	551	1416	292	976	344	747	405	1148	445	738	578	854	633	734	359	813	508	806	342	319	369	1098	663	759	460	474	376	972	495	737	329	502	366	1030	499	555	395	623	229	396	145	435	215	391	128
AT1G21890	Carubv10009309	CARHR022240	Thhalv10007890	5	5	3	2	8	7	0	9	2	12	4	5	3	5	2	0	2	11	0	0	1	0	2	2	0	0	2	0	5	0	0	0	1	0	0	3	27	9	7	7	30	25	30	10	5	2
AT1G21900	Carubv10010277	CARHR022250	Thhalv10008753	1235	2610	1684	2848	1963	2399	1139	1949	1385	2381	1200	2159	1322	2008	1082	2268	1650	1827	1804	3139	2172	2113	1600	2377	2564	3294	2207	2479	1738	1681	1757	2421	1974	2110	1669	1991	2727	4038	2382	4141	3407	5172	2276	2507	2273	3291
AT1G21910	Carubv10010179	CARHR022260	Thhalv10008639	401	433	1065	457	470	392	312	162	486	204	149	379	849	520	819	492	807	416	465	125	289	311	741	480	364	127	229	199	538	400	310	156	223	250	519	531	140	117	236	152	163	76	239	46	275	124
AT1G21920	Carubv10009218	CARHR022270	Thhalv10007661	1906	2112	1551	1738	1756	1648	1438	1089	1181	1253	675	1459	1990	1527	1708	1918	1554	832	929	359	688	1057	785	491	484	279	580	710	403	311	617	406	750	702	726	615	1197	1571	1033	1152	1750	1756	1138	788	803	1184
AT1G21930	Carubv10010735	CARHR022310	Thhalv10009188	597	401	523	479	608	436	820	621	573	840	628	398	571	345	354	444	305	322	619	517	946	505	451	509	1015	655	614	855	600	337	614	436	777	838	503	515	531	534	503	470	401	332	461	338	487	509
AT1G21970	Carubv10011036	CARHR022320	Thhalv10009593	0	0	3	0	0	0	0	0	0	1	0	0	2	0	1	3	0	2	0	0	1	1	0	5	0	0	0	9	0	10	0	0	0	6	1	2	2	8	0	5	0	1	10	3	0	8
AT1G22000	Carubv10012356	CARHR024990	Thhalv10009745	0	0	0	0	2	4	0	4	0	0	0	2	3	4	1	2	3	0	1	0	0	0	0	0	0	0	0	0	0	0	0	0	0	0	0	1	0	0	0	0	0	0	1	0	0	0
AT1G22015	Carubv10011446	CARHR022360	Thhalv10009382	0	0	0	0	0	0	0	0	0	0	9	0	0	0	0	0	0	0	0	0	0	0	0	0	0	0	0	0	0	0	0	0	0	0	0	0	0	0	0	0	0	0	0	0	0	0
AT1G22020	Carubv10008636	CARHR022370	Thhalv10007136	673	1222	1113	1285	813	959	615	596	834	827	424	875	771	1068	1165	1443	1182	692	1246	1138	734	1376	1446	1180	1055	1205	1108	1225	917	877	1151	1149	1255	1115	1152	1091	1032	1245	1304	997	1542	1822	854	763	923	768
AT1G22030	Carubv10009660	CARHR022380	Thhalv10010029	212	233	348	140	271	169	153	146	263	151	160	205	234	151	214	130	178	139	203	122	137	247	221	153	138	89	285	213	141	114	182	79	268	247	160	171	160	196	144	127	270	164	137	110	113	71
AT1G22040	Carubv10008879	CARHR022390	Thhalv10007536	318	634	550	652	354	529	293	372	426	484	215	508	319	419	558	735	479	417	497	508	539	705	698	892	379	500	446	592	500	635	484	518	520	594	638	722	562	1098	572	702	888	1922	472	588	455	593
AT1G22050	Carubv10010678	CARHR022400	Thhalv10009136	210	340	355	333	286	332	248	173	290	166	91	305	283	216	298	315	365	247	235	318	448	343	364	269	294	262	331	301	224	236	241	303	317	286	274	255	614	1456	616	963	1179	2414	459	1140	624	780
AT1G22060	Carubv10008070	CARHR022410	Thhalv10006527	1191	1513	1746	1180	1109	1002	906	687	1219	706	597	1056	1180	1618	1496	1364	1486	603	2288	856	789	1514	2371	1042	1189	747	1284	1031	1190	740	1588	682	1470	988	1464	872	1399	1086	1510	1170	1460	1410	1005	719	1312	819
AT1G22065	Carubv10010515	CARHR022420	Thhalv10009379	191	228	280	166	355	391	86	77	207	135	281	332	121	103	110	124	311	259	31	26	177	99	92	115	23	38	70	86	52	57	26	30	63	96	44	62	337	384	375	229	1265	732	224	154	232	116
AT1G22070	Carubv10009423	CARHR022430	Thhalv10007944	475	1282	1416	1526	744	1528	412	780	998	890	546	1129	484	1014	880	1339	637	916	584	2262	3119	3937	1633	3538	1016	1641	2726	4059	1600	3756	955	1855	2843	3577	1126	2961	772	1317	1444	2222	1353	2698	632	988	1926	1333
AT1G22100	Carubv10012434	CARHR022450	Thhalv10007647	0	0	0	1	0	0	0	0	0	0	0	0	0	0	0	0	0	0	0	0	0	0	0	0	0	1	0	0	0	0	0	0	0	0	0	1	8	21	3	3	18	6	9	2	4	2
AT1G22120	Carubv10011921	CARHR022470	Thhalv10009423	0	0	0	0	0	0	0	0	0	0	0	0	3	0	0	0	0	0	0	0	0	0	0	0	0	0	0	0	0	0	0	0	0	0	0	0	0	0	0	0	0	1	0	0	0	0
AT1G22140	Carubv10010733	CARHR022490	Thhalv10009245	875	793	806	694	1108	1048	1021	801	777	915	921	963	1088	668	559	583	851	869	470	409	491	319	278	391	453	410	391	449	398	269	425	369	388	446	364	447	418	553	347	380	553	657	361	328	312	476
AT1G22150	Carubv10011339	CARHR022500	Thhalv10009756	13	24	85	17	30	13	0	7	36	7	30	9	5	9	6	2	14	11	0	0	0	0	0	0	0	0	0	1	0	0	0	0	0	0	0	0	37	68	146	86	48	25	67	81	231	14
AT1G22160	Carubv10010569	CARHR022510	Thhalv10008987	194	92	94	28	182	209	121	124	124	48	315	207	169	112	65	29	203	172	12	3	15	3	67	84	15	5	9	9	160	105	19	2	6	2	101	153	15	22	19	7	21	15	17	7	20	4
AT1G22170	Carubv10009571	CARHR022520	Thhalv10008087	277	215	330	125	269	150	240	189	287	169	352	220	235	220	133	102	232	155	100	112	133	93	308	220	169	150	171	163	282	176	155	118	114	144	223	204	275	243	429	181	216	170	235	159	402	177
AT1G22180	Carubv10009832	CARHR022530	Thhalv10008258	336	909	688	1340	618	914	250	663	616	1173	319	869	290	645	472	776	327	425	244	3078	696	460	534	1154	449	2915	477	670	555	723	401	2714	501	814	415	770	532	1642	545	938	1245	2564	433	1212	564	938
AT1G22190	Carubv10009949	CARHR022540	Thhalv10008326	1481	1168	1867	1549	1628	1783	969	933	1422	1358	958	1331	1426	1294	1152	1181	1356	1433	557	1156	389	842	832	943	569	859	718	1088	707	777	549	1100	873	1272	663	910	2483	2841	2466	2349	3850	3488	1711	1133	2218	2161
AT1G22200	Carubv10009420	CARHR022550	Thhalv10007894	1169	1757	1942	1954	1643	1536	1247	1267	1697	1702	1548	1498	1221	1381	1536	1743	1578	1099	1402	3127	1498	1489	1365	1588	1913	3493	1624	1815	1490	1118	1669	2909	1935	1660	1537	1544	2175	2822	2708	2457	2630	2734	1911	1708	2140	2353
AT1G22210	Carubv10011681	CARHR022560	Thhalv10008468	0	4	0	10	3	24	0	0	1	2	0	24	0	3	0	8	4	15	0	0	0	0	0	1	0	0	0	0	0	0	0	0	0	0	0	0	0	0	0	0	0	10	0	0	0	0
AT1G22220	Carubv10009775	CARHR022570	Thhalv10010014	48	25	370	62	138	94	47	21	98	31	53	65	45	54	120	119	121	44	11	112	61	81	67	60	33	116	28	48	64	53	18	73	36	39	79	50	107	186	183	146	147	158	120	95	159	123
AT1G22230	Carubv10009798	CARHR022580	Thhalv10008264	116	114	195	86	230	72	63	75	164	141	146	100	115	60	146	77	205	70	107	526	140	84	185	296	87	354	100	116	181	100	88	342	78	77	144	166	215	1208	336	382	846	888	227	701	189	261
AT1G22240	Carubv10012475	CARHR022590	Thhalv10009853	0	2	11	0	3	0	0	0	1	0	0	1	6	2	0	1	2	0	0	0	0	0	0	1	0	2	2	0	0	0	0	1	0	2	0	0	0	2	2	0	3	6	0	2	0	0
AT1G22250	Carubv10010336	CARHR022620	Thhalv10008815	87	308	170	139	45	120	97	283	190	187	40	147	114	300	112	138	47	94	118	547	505	270	163	252	91	444	339	281	106	131	128	533	368	304	81	162	0	0	0	0	0	0	0	0	0	0
AT1G22260	Carubv10011139	CARHR022660	Thhalv10018107	13	33	39	14	24	11	25	16	28	20	23	17	28	33	13	16	20	13	5	4	3	3	2	6	2	5	4	2	3	0	1	1	2	1	2	1	60	156	54	48	131	184	55	95	40	53
AT1G22280	Carubv10009953	CARHR022670	Thhalv10008416	849	5440	2236	4041	1191	2955	903	3842	1871	3222	881	2419	990	5004	1810	3120	987	1670	1419	9438	2496	2697	2106	4421	1610	8672	2749	2843	1563	2457	1276	9287	2606	3033	1409	2759	1650	10436	2521	3150	4412	9435	1733	8441	2215	2893
AT1G22300	Carubv10010075	CARHR022680	Thhalv10008554	6610	9073	9678	9292	8452	9357	9277	8558	8434	14564	9199	7943	7595	7397	5768	8123	6689	6235	6434	7096	10197	8437	6340	7361	8144	8565	7744	10373	6955	6292	6506	6591	7045	8461	5791	6249	7008	9723	8323	9274	7746	7670	7048	6473	7580	9046
AT1G22310	Carubv10008794	CARHR022690	Thhalv10007200	555	557	481	423	455	349	518	488	483	472	348	443	660	430	429	379	365	326	459	253	243	391	274	265	443	312	399	505	310	207	355	326	476	428	264	264	209	197	349	295	340	382	168	129	321	303
AT1G22330	Carubv10009918	CARHR022700	Thhalv10008357	591	338	458	193	157	136	688	395	441	188	201	202	652	322	425	185	212	138	567	286	168	298	272	213	671	268	498	469	207	158	519	217	546	409	368	193	342	254	357	133	181	131	283	107	226	94
AT1G22360	Carubv10008992	CARHR022720	Thhalv10007499	1163	4165	2756	3712	1112	2005	1748	2738	2357	3131	832	2017	1406	3112	2046	3387	1270	1649	1755	24580	2226	4244	1018	2271	1874	16340	2488	3955	876	2015	1852	19554	2116	3182	933	2184	2224	10196	2418	3332	6482	12426	2099	8809	3560	2273
AT1G22410	Carubv10008840	CARHR022760	Thhalv10007380	3222	14973	6213	9040	7556	12342	2840	4252	4234	4608	4260	9414	3279	10009	3901	8968	9766	7948	6211	13006	3385	7065	12263	20042	5086	14827	4946	7845	8735	17121	5278	8549	3222	4934	8653	11126	2704	22150	2113	7958	4843	25049	2125	16371	1855	7745
AT1G22430	Carubv10005213	CARHR022770	Thhalv10007878	2173	1950	2795	2060	2498	2020	2573	2000	2900	2594	1672	1916	2183	1766	2461	2044	1352	1255	206	153	261	415	240	219	260	187	459	604	187	109	206	173	522	543	311	245	1271	1790	2148	1210	1698	1468	1451	1104	1603	1478
AT1G22440	Carubv10009406	CARHR022780	Thhalv10007889	720	978	1499	757	1257	908	683	569	921	845	602	858	695	634	832	823	1048	504	127	84	281	178	234	207	337	99	183	262	257	135	176	103	193	311	266	167	107	209	133	69	411	271	86	143	109	43
AT1G22450	Carubv10010326	CARHR022790	Thhalv10008804	2746	2784	4721	3391	4565	3460	3091	3058	4041	3696	3494	3722	3152	2511	2535	2896	3714	3435	2820	2511	3774	2949	3351	3685	4192	3364	3578	4202	4344	2790	3063	2366	3287	3656	3370	3210	3351	4046	3861	3793	3709	2928	3160	2648	3501	2985
AT1G22460	Carubv10012492	CARHR022800	Thhalv10007232	15	20	30	10	54	17	21	17	25	12	16	11	19	24	19	6	29	5	6	19	7	17	19	4	18	19	18	6	14	6	8	11	10	11	4	12	0	6	3	3	3	6	2	10	1	0
AT1G22470	Carubv10010560	CARHR022810	Thhalv10009293	19	15	98	43	26	17	11	7	40	33	21	30	33	11	33	43	40	23	15	3	31	15	24	18	27	15	31	34	46	24	14	3	36	26	17	15	7	82	15	3	30	71	11	79	24	14
AT1G22480	Carubv10010418	CARHR022820	Thhalv10009689	0	4	2	2	1	0	0	0	0	0	0	0	3	0	0	2	0	0	2	0	0	0	0	0	0	0	2	0	1	0	0	0	0	0	1	0	0	0	0	0	0	0	0	0	0	0
AT1G22490	Carubv10011476	CARHR022830	Thhalv10009836	19	8	42	22	32	7	10	14	32	22	5	14	23	8	62	34	14	4	28	12	30	17	79	55	38	12	25	30	106	42	18	12	18	21	77	41	75	45	72	93	108	49	39	27	69	28
AT1G22500	Carubv10012585	CARHR022870	Thhalv10007970	278	242	758	1185	728	348	245	122	466	551	130	320	373	228	926	2413	667	381	34	63	222	113	47	51	43	48	88	72	38	69	56	59	84	89	67	77	41	47	48	33	33	27	29	31	27	14
AT1G22530	Carubv10008471	CARHR022890	Thhalv10007015	2113	1670	5403	3198	2883	2008	2619	1004	3782	3229	1958	1778	3624	2099	5300	3532	3687	1619	2635	1030	2225	3466	4005	3817	2867	1311	2434	2890	3148	3262	3394	1354	3117	2351	3212	3579	878	1216	1935	816	1776	1561	1073	719	1946	593
AT1G22540	Carubv10008731	CARHR022910	Thhalv10007248	242	352	441	397	265	287	240	244	346	237	119	276	316	278	408	488	288	226	418	228	1152	1481	268	297	253	193	1310	1260	264	309	311	183	1613	1131	314	388	877	912	954	1178	694	631	699	401	818	882
AT1G22550	Carubv10011935	CARHR022920	Thhalv10007251	340	301	639	181	387	190	361	183	475	254	289	274	364	203	519	286	360	161	11	31	37	51	22	24	18	37	23	34	31	14	36	32	30	25	28	27	945	819	2289	1675	917	640	1067	366	1957	1925
AT1G22570	Carubv10011811	CARHR022950	Thhalv10007239	339	416	1492	1327	227	286	368	324	1232	979	96	286	481	380	1745	1557	157	179	6	17	2	46	6	38	6	33	6	31	7	31	3	11	11	48	10	76	10	89	58	121	49	105	13	72	24	121
AT1G22590	Carubv10011303	CARHR022960	Thhalv10008961	767	539	1039	480	795	507	612	459	1016	509	410	516	720	490	899	525	520	319	0	0	1	0	0	1	0	9	0	1	0	0	0	0	0	0	0	0	0	0	1	1	2	0	0	0	0	0
AT1G22610	Carubv10011531	CARHR022980	Thhalv10006627	1140	2122	1996	1799	1792	2206	1159	1200	1379	993	950	1853	1473	2228	1636	2330	2061	1469	1722	1070	557	927	4261	2743	1367	946	890	843	2505	2128	1569	934	919	862	2564	2357	1472	1892	1464	1026	4030	4254	1094	972	1279	627
AT1G22620	Carubv10012563	CARHR022990	Thhalv10006740	534	773	991	952	485	512	438	444	757	809	310	508	656	647	1076	1322	513	370	808	556	573	1068	755	709	665	564	791	837	430	668	702	512	941	770	701	784	644	829	1201	1064	475	735	578	424	731	854
AT1G22630	Carubv10010657	CARHR023000	Thhalv10009125	1155	586	1555	874	1730	1601	1060	620	1679	1040	1381	1622	1494	726	1579	1316	1400	1216	1200	278	145	111	2051	1058	583	231	168	128	1220	386	896	342	183	121	2222	1019	721	508	1383	775	658	386	856	246	1086	1026
AT1G22640	Carubv10009761	CARHR023010	Thhalv10008456	632	374	373	363	691	481	479	276	318	410	353	478	420	312	236	347	382	423	247	131	197	167	239	250	205	71	255	247	220	172	192	89	231	204	220	171	188	261	189	241	364	394	227	138	140	293
AT1G22650	Carubv10009286	CARHR023020	Thhalv10007305	323	1482	524	394	357	520	272	733	364	247	297	605	423	1483	280	508	415	549	123	164	81	165	240	142	249	178	273	218	201	124	135	113	363	325	164	91	33	28	37	5	35	21	14	15	18	13
AT1G22660	Carubv10008660	CARHR023030	Thhalv10007128	386	356	479	370	413	292	385	198	370	320	216	322	441	362	413	466	442	258	748	385	315	674	554	440	694	451	681	705	513	408	669	400	851	816	551	479	423	362	522	407	550	675	340	211	441	323
AT1G22690	Carubv10010675	CARHR023060	Thhalv10009167	2341	2384	2792	2417	1611	1051	2919	2330	2355	2372	1017	1126	2670	2023	1708	1895	1277	1069	625	1125	1880	1176	364	287	371	713	1679	1435	169	174	663	1161	2560	1684	476	381	145	329	263	120	87	66	244	164	156	216
AT1G22700	Carubv10009887	CARHR023070	Thhalv10008318	2295	1947	3113	1617	2269	1648	2605	1718	2881	2150	1755	1757	2811	1920	2896	2407	1881	1287	3155	1622	2618	2419	1907	1319	2141	1552	2722	2531	1694	1015	2261	1520	3315	2621	2029	1297	2164	1826	2914	1558	1445	1176	2175	1154	2304	1711
AT1G22710	Carubv10008884	CARHR023080	Thhalv10009321	1774	4220	3781	4081	1385	2027	1154	1029	2104	1606	495	1687	1478	2749	2644	5056	1529	1388	3514	3106	3256	3816	2841	1921	1261	1379	2766	2198	1162	1454	2926	1990	2441	1417	3900	1832	2188	3850	5639	5404	1544	1380	2618	1795	2288	2789
AT1G22730	Carubv10011923	CARHR023090	Thhalv10006903	757	1198	1399	1373	1090	1003	661	675	1103	915	564	1041	901	1109	1312	1441	1340	816	841	830	597	956	709	573	570	739	744	807	463	528	752	867	1133	814	625	645	66	59	109	53	123	132	38	47	56	20
AT1G22740	Carubv10011037	CARHR023100	Thhalv10008896	313	180	697	379	212	131	470	222	673	500	212	163	452	199	727	330	172	90	516	386	536	357	458	455	519	298	553	451	449	296	619	341	543	366	484	329	521	494	898	406	711	566	589	315	868	352
AT1G22750	Carubv10010067	CARHR023110	Thhalv10008541	1322	1288	1414	1601	2386	2553	1354	1211	1224	1420	1210	1967	1337	1064	1125	1460	1678	1747	2028	1869	1745	937	1880	2779	2228	1704	1093	1270	1857	1963	1906	1664	1011	1067	1984	2220	458	490	658	682	1156	1387	516	330	550	586
AT1G22770	Carubv10012213	CARHR023130	Thhalv10006603	502	919	1261	1180	2140	1871	613	452	727	748	877	1247	464	764	844	924	1834	999	1172	771	1267	699	2887	2378	714	775	826	653	1387	1982	991	747	1082	584	1552	1654	617	650	2611	1496	1908	3227	451	365	1658	665
AT1G22800	Carubv10009412	CARHR023160	Thhalv10007396	416	522	651	377	433	367	492	417	528	380	330	461	541	550	464	467	445	349	376	299	327	313	339	318	400	442	362	346	304	227	280	279	417	406	303	302	434	432	404	248	354	235	375	275	314	227
AT1G22810	Carubv10011955	CARHR023170	Thhalv10009842	5	364	8	20	50	61	0	172	0	14	0	34	3	381	3	22	10	35	6	727	7	40	26	122	0	666	5	27	9	91	7	973	22	59	8	46	1	330	13	2	51	155	2	266	1	3
AT1G22830	Carubv10008463	CARHR023180	Thhalv10009874	120	120	255	126	170	181	98	67	188	129	68	134	135	143	225	198	176	99	73	72	50	80	165	128	93	101	83	85	72	76	81	90	79	72	90	95	108	104	98	83	108	123	72	95	83	101
AT1G22850	Carubv10009653	CARHR023190	Thhalv10008173	3875	3337	2448	1506	4262	3416	3463	2665	2017	1674	2901	3282	4354	3504	2053	1646	3764	2709	3698	2434	1156	1857	3936	3105	2998	2489	1957	2065	3068	2419	2879	2199	2000	1847	3961	3259	2001	2238	1379	791	2262	1954	2015	1276	1009	780
AT1G22860	Carubv10008204	CARHR023210	Thhalv10006692	544	761	706	693	547	548	484	497	565	486	363	539	549	746	740	672	602	366	730	460	384	754	615	464	557	565	599	609	406	363	563	436	650	569	624	539	583	699	742	682	799	1007	465	408	486	574
AT1G22870	Carubv10008248	CARHR023220	Thhalv10006737	448	760	633	651	370	445	208	363	407	272	95	507	363	815	586	624	466	342	749	1643	300	715	412	637	821	1545	710	752	286	431	685	1202	885	718	461	490	549	814	669	622	601	808	471	384	500	540
AT1G22882	Carubv10008493	CARHR023240	Thhalv10006998	694	776	1152	991	801	925	674	594	891	572	641	882	1075	867	1061	841	1133	700	617	677	254	648	972	1066	889	901	615	693	954	687	713	704	679	690	736	861	520	865	533	449	809	948	528	608	580	366
AT1G22910	Carubv10010106	CARHR023290	Thhalv10008564	478	689	811	573	422	440	507	355	813	391	288	443	555	629	681	589	471	300	717	549	674	511	552	517	639	571	554	448	408	323	624	467	588	413	536	390	202	226	336	148	182	124	221	100	171	119
AT1G22920	Carubv10009554	CARHR023300	Thhalv10008042	745	811	1281	951	1019	795	996	837	1091	992	764	861	969	788	867	977	943	793	892	645	800	902	1027	1025	1238	958	1189	1204	1256	681	906	687	1232	1188	1003	901	1677	1635	1957	1451	2007	1947	1400	968	1422	1353
AT1G22930	Carubv10008224	CARHR023310	Thhalv10006618	2926	5540	5261	8429	4609	7033	2545	2927	4102	6067	2187	4579	3001	4419	6479	10181	4474	3206	2894	2487	2023	5531	4737	5803	2390	2018	3401	4239	2016	2691	2448	2445	3887	3453	3656	3366	4771	7710	7074	8294	11311	16901	5057	4319	5156	8801
AT1G22940	Carubv10009472	CARHR023320	Thhalv10007358	536	492	828	576	588	393	465	368	629	606	358	497	498	466	572	623	538	343	1051	622	849	1040	1198	1021	1108	727	1034	1124	1177	840	1085	655	1222	970	1071	973	787	652	1252	617	614	499	653	373	797	489
AT1G22950	Carubv10009356	CARHR023330	Thhalv10007812	528	581	998	626	952	745	513	476	758	583	794	793	603	649	710	587	946	585	439	294	403	366	681	535	581	371	552	398	623	343	606	287	550	469	533	481	971	864	854	598	927	834	749	513	667	564
AT1G22960	Carubv10011979	CARHR023340	Thhalv10006897	133	371	326	361	217	193	61	75	232	70	62	206	168	392	397	277	401	119	290	330	209	312	406	228	187	285	223	176	218	194	242	322	243	184	283	201	424	459	368	256	428	499	251	342	315	170
AT1G22970	Carubv10009565	CARHR023350	Thhalv10008033	660	562	764	556	854	696	605	484	661	586	617	715	734	487	602	572	770	622	608	332	803	453	718	509	638	351	589	580	524	379	516	375	615	624	547	537	1198	741	1217	636	1316	1024	891	438	891	576
AT1G22985	Carubv10010423	CARHR023360	Thhalv10008928	114	202	150	210	92	109	72	152	139	248	128	111	157	145	132	174	70	106	131	126	174	152	63	69	108	113	156	117	61	69	91	161	158	107	84	106	130	166	136	85	111	160	146	109	90	82
AT1G22990	Carubv10010550	CARHR023370	Thhalv10008952	34	39	40	10	45	32	37	33	27	17	43	23	38	15	25	14	54	14	64	64	142	26	58	38	114	134	50	40	53	43	66	89	37	56	47	67	108	142	81	13	98	34	74	84	40	31
AT1G23000	Carubv10012305	CARHR023380	Thhalv10009651	279	98	268	89	252	60	279	166	245	165	312	154	224	141	111	58	68	121	87	25	78	31	81	46	34	28	55	37	56	31	57	9	68	46	39	34	108	52	102	57	82	41	89	40	86	41
AT1G23010	Carubv10008681	CARHR023390	Thhalv10007182	41	45	221	161	253	188	45	25	159	80	117	164	41	44	150	190	209	153	266	99	392	412	881	515	205	92	504	305	499	318	230	126	412	319	915	481	97	206	460	281	249	255	105	129	202	280
AT1G23020	Carubv10008345	CARHR023400	Thhalv10006972	1509	1874	2119	2283	2017	2541	1808	2368	1943	2460	1213	2032	1900	2117	1496	2310	1426	1817	404	631	978	1503	641	835	784	672	1368	2342	597	812	474	268	1108	1082	554	770	238	658	392	524	676	971	271	472	334	530
AT1G23030	Carubv10008550	CARHR023410	Thhalv10007104	572	560	957	462	1032	848	420	272	730	203	414	800	813	638	847	552	1236	479	1105	334	367	416	1769	990	674	299	621	432	912	922	987	283	410	232	1020	760	584	600	674	184	542	287	543	300	350	191
AT1G23050	Carubv10010514	CARHR023430	Thhalv10009563	59	28	73	58	49	40	58	32	74	65	30	27	59	28	64	89	25	14	60	41	54	56	23	17	37	27	43	44	21	24	55	28	64	42	45	34	47	52	53	53	39	32	72	15	37	62
AT1G23060	Carubv10012440	CARHR023440	Thhalv10007872	50	85	107	64	70	43	80	49	50	82	26	124	64	75	63	69	73	65	178	63	139	64	132	30	90	17	85	36	77	42	120	51	84	49	105	48	31	19	27	14	21	2	28	11	14	20
AT1G23070	Carubv10011781	CARHR023450	Thhalv10011000	14	0	1	0	0	4	5	2	0	0	0	0	0	0	0	0	0	2	0	1	0	0	1	0	0	1	0	0	2	0	2	0	0	0	1	1	13	6	8	1	5	4	9	4	0	2
AT1G23080	Carubv10008599	CARHR023460	Thhalv10007111	3362	2837	3789	2319	2160	1924	2980	1772	3255	2242	1649	2424	3545	2435	3300	2989	2714	1691	2474	1038	836	1381	1280	964	2013	914	1045	1245	1084	637	1789	960	1224	1080	1511	908	2922	1506	1723	879	4662	1751	2231	744	1016	637
AT1G23090	Carubv10012133	CARHR023470	Thhalv10007442	607	2210	1952	1668	1175	1013	532	1004	1825	1336	415	1125	783	1551	2198	1859	1122	776	1931	1744	2106	2949	2227	1332	1543	1689	3432	2187	1178	1089	1767	1731	3607	1949	1728	1243	1052	1228	1521	868	2158	1480	966	677	944	641
AT1G23100	Carubv10010739	CARHR023480	Thhalv10009186	401	267	850	251	669	311	367	359	587	416	632	400	459	260	319	259	481	339	415	220	734	230	530	410	485	381	495	285	584	275	434	325	403	380	449	369	996	1018	881	408	926	464	952	693	787	366
AT1G23110	Carubv10010929	CARHR023490	Thhalv10008584	5	4	6	3	59	55	9	6	18	0	122	82	15	13	4	4	30	31	9	26	24	7	93	132	54	29	26	44	38	84	19	24	5	6	72	66	5	0	1	2	79	35	2	2	1	0
AT1G23120	Carubv10011772	CARHR023540	Thhalv10009023	189	251	159	306	166	280	152	149	157	339	97	211	249	146	142	198	152	146	1080	1303	1963	1242	540	778	995	1063	1214	1466	516	668	972	1246	1290	1220	721	917	492	1537	520	1814	782	2745	446	969	416	2326
AT1G23140	Carubv10010496	CARHR162090	Thhalv10008947	48	87	207	261	329	456	53	52	157	234	249	244	70	41	133	140	213	196	157	119	167	181	276	397	194	107	168	290	221	231	119	74	164	193	268	249	363	380	513	675	598	589	312	208	524	756
AT1G23170	Carubv10008554	CARHR023630	Thhalv10007115	140	421	265	163	224	138	107	159	190	104	77	193	179	361	165	163	211	149	465	923	263	434	566	477	456	1001	446	499	558	455	475	642	412	461	504	544	0	0	0	0	0	0	0	0	0	0
AT1G23180	Carubv10008302	CARHR023620	Thhalv10006791	589	721	949	475	652	445	394	283	728	272	202	561	703	763	771	700	1092	537	1318	519	889	1008	1328	614	703	443	960	708	836	618	993	589	1234	811	1273	706	2025	2071	2226	1226	1460	1421	1626	1285	1689	1335
AT1G23190	Carubv10008678	CARHR023640	Thhalv10007178	1396	2447	3063	2223	2872	2787	1909	1445	2215	1881	1734	2440	1861	2478	2037	3091	3703	2209	3440	2860	2487	3648	5501	4014	3497	2995	3735	3766	4930	3607	3625	2317	3476	2993	5305	3880	4936	6223	7508	7155	7436	6688	5174	3662	5899	4992
AT1G23200	Carubv10008680	CARHR023650	Thhalv10007274	17	292	81	39	55	28	34	193	40	16	12	32	16	190	13	19	41	7	62	153	49	34	82	32	40	88	21	15	39	24	58	115	51	15	64	22	49	63	22	13	29	6	44	40	11	13
AT1G23205	Carubv10011899	CARHR023660	Thhalv10008638	80	39	285	60	1013	498	131	37	193	65	746	312	160	158	154	113	1026	403	73	25	59	48	234	78	44	54	32	74	262	97	60	37	23	24	432	126	138	93	127	79	436	147	150	32	89	33
AT1G23210	Carubv10010959	CARHR023670	Thhalv10007462	0	3	5	0	20	0	0	2	8	0	4	8	5	3	2	2	9	4	1	5	3	1	5	4	3	4	0	4	2	5	2	2	2	3	0	3	11	19	15	5	28	0	4	6	11	0
AT1G23220	Carubv10010634	CARHR023680	Thhalv10009103	755	1220	964	975	1023	1034	838	1138	811	1121	888	999	855	1131	664	816	815	851	643	503	675	448	643	700	833	549	689	712	808	533	701	496	744	693	668	708	810	1102	930	676	801	743	884	699	740	819
AT1G23230	Carubv10012123	CARHR023690	Thhalv10006548	587	1112	1157	1029	765	739	424	430	729	431	378	798	536	1071	1086	1392	1015	564	684	484	437	1001	937	587	464	496	633	587	389	529	573	364	801	699	666	538	1027	1237	1950	1659	1249	1559	817	671	1301	1025
AT1G23260	Carubv10010512	CARHR023700	Thhalv10008977	1269	1195	1202	1274	1259	1226	1568	1567	1132	2252	1206	1108	1189	1092	862	1050	781	967	1746	1991	2272	1680	1332	2160	2578	2251	1886	2470	1506	1300	1778	1640	1815	2048	1492	1746	1030	1359	1324	1347	1070	1223	1146	768	1096	1378
AT1G23270	Carubv10012590	CARHR023710	Thhalv10009724	0	0	0	0	0	0	0	0	0	0	0	0	0	1	0	0	0	0	0	0	4	0	0	0	0	0	0	0	0	0	0	0	0	0	0	0	0	0	0	0	0	0	0	0	0	0
AT1G23280	Carubv10009869	CARHR023720	Thhalv10008312	1279	1161	2629	1364	2652	1381	1046	875	2097	1210	1618	1726	1863	1143	1888	1295	2911	1397	1755	1028	1911	1324	3184	1762	2777	1675	1817	1496	3054	1191	2224	1637	1982	1824	2161	1618	3372	3160	3048	1830	3935	2983	2307	1998	2632	1578
AT1G23290	Carubv10011206	CARHR023730	Thhalv10009027	9734	6969	14385	7283	14832	8278	10761	8658	12458	10375	10756	9044	11338	6803	6978	5798	9739	8753	11217	8135	7051	6869	11039	9015	12830	10329	10120	7866	14599	8147	9594	8903	7987	7782	10038	8828	16232	17492	16180	11518	14149	8224	15374	8917	12799	10754
AT1G23300	Carubv10012410	CARHR023750	Thhalv10009930	0	0	0	0	0	0	0	0	0	0	0	0	0	0	0	0	2	0	0	0	0	0	1	10	0	2	0	3	1	0	0	4	0	0	0	1	0	0	0	0	0	1	2	0	0	0
AT1G23310	Carubv10009003	CARHR023760	Thhalv10007514	44697	50046	40475	40427	44837	38045	42696	38660	37954	41920	27584	41685	46958	49570	53234	57096	38914	30915	31188	22456	26743	41723	33963	28169	21345	19244	34034	31280	23580	19978	29639	26050	47646	35862	43950	28526	15191	17413	25080	17168	14045	9530	16082	11661	18216	17372
AT1G23320	Carubv10011523	CARHR023770	Thhalv10009685	0	0	0	0	0	0	0	0	0	1	0	0	0	0	0	1	0	0	0	0	1	0	0	0	0	0	0	0	0	0	0	0	0	0	0	0	0	0	0	0	0	0	1	0	0	0
AT1G23330	Carubv10009040	CARHR023780	Thhalv10007569	314	445	396	322	726	582	268	286	324	409	375	438	396	321	330	279	656	357	682	4540	630	399	1691	1844	591	4550	419	503	996	771	558	4223	388	541	1367	1213	174	317	118	103	530	778	150	216	75	77
AT1G23340	Carubv10009305	CARHR023790	Thhalv10007770	101	72	135	60	161	56	124	42	156	52	139	66	96	91	102	38	95	67	49	21	28	29	74	41	52	47	59	37	48	17	34	19	37	32	67	18	88	98	93	70	70	26	69	50	73	74
AT1G23350	Carubv10011971	CARHR023800	Thhalv10008931	12	5	5	0	4	3	4	2	1	0	0	2	2	3	5	0	2	2	8	5	0	0	0	2	8	3	3	2	2	1	5	6	3	3	1	7	0	0	0	0	0	0	0	0	0	0
AT1G23360	Carubv10010043	CARHR023810	Thhalv10008293	1199	649	1397	948	1077	820	1277	1071	1477	1604	1152	831	1244	623	1053	742	579	543	750	473	715	441	461	353	699	534	731	606	583	194	562	471	712	590	536	403	437	405	524	255	338	186	457	283	385	218
AT1G23390	Carubv10012221	CARHR023830	Thhalv10007835	4504	4503	5753	6652	1378	1991	3858	3216	5749	7702	904	2418	3532	3332	5584	8389	1183	1374	956	986	1762	877	256	227	446	628	736	800	102	320	768	803	633	393	514	439	486	3160	514	649	858	2495	618	2148	421	491
AT1G23400	Carubv10008723	CARHR023840	Thhalv10007246	2479	1439	2603	1731	1430	1235	1994	1341	2169	1957	1090	1472	2546	1568	2829	3048	1839	1109	1504	486	694	1590	1363	1015	1394	546	1372	1486	1054	790	1295	553	1703	1406	1607	1248	682	488	2925	1381	555	637	679	279	2050	1385
AT1G23410	Carubv10012327	CARHR023850	Thhalv10008988	698	331	1029	241	1260	462	560	598	839	411	849	694	735	411	421	140	868	537	3819	2492	4951	2171	4018	2834	4229	3181	3359	2329	4889	2419	3214	2696	2630	2377	3360	2959	13691	14480	12872	8752	10054	4823	13049	7215	10241	7914
[truncated: 16,147 more rows]
[truncated: 56 more columns]
